# Supplementary material for: Profiling Analysis of N6-Methyladenosine mRNA Methylation Reveals Differential m6A Patterns during the Embryonic Skeletal Muscle Development of Ducks
Source: MDPI journal article supplement (doi:10.3390/ani12192593), 2022-09-28
Supplement: s1 [file s1]

---

Number of m6A peaks of E13

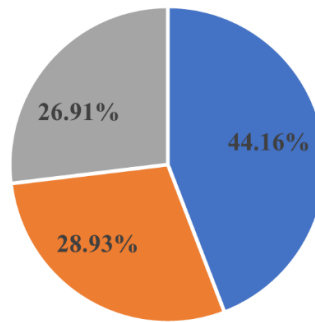

■ peak\_num=1   ■ peak\_num=2   ■ peak\_num>2

---

Number of m6A peaks of E19

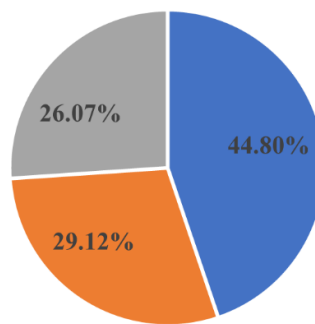

■ peak\_num=1   ■ peak\_num=2   ■ peak\_num>2

---

**Figure S2.** The proportion of 1 - 2 m6A peaks in each group.
