# Supplementary material for: Profiling Analysis of N6-Methyladenosine mRNA Methylation Reveals Differential m6A Patterns during the Embryonic Skeletal Muscle Development of Ducks
Source: MDPI journal article supplement (doi:10.3390/ani12192593), 2022-09-28
Supplement: s1 [file s1]

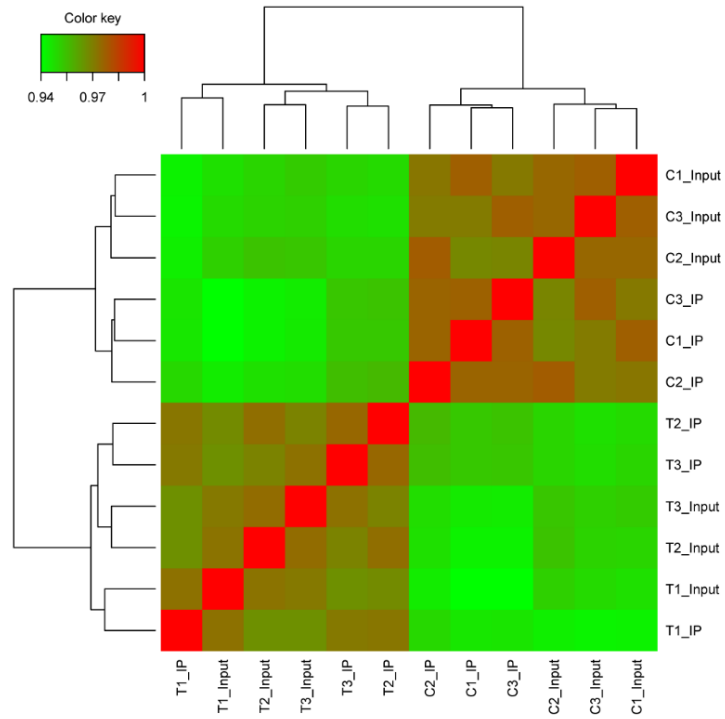

**Figure S1.** The correlation coefficient of MeRIP-seq samples. C group represents E13 group. T group represents E19 group.
