# Supplementary material for: Profiling Analysis of N6-Methyladenosine mRNA Methylation Reveals Differential m6A Patterns during the Embryonic Skeletal Muscle Development of Ducks
Source: MDPI journal article supplement (doi:10.3390/ani12192593), 2022-09-28
Supplement: s1 [file s1]

**Table S1.** Primers used for qRT-PCR.

| Gene Name      | Forward Primer (5' to 3') | Reverse Primer (5' to 3') | Annealing Temperature (°C) |
|----------------|---------------------------|---------------------------|----------------------------|
| <i>METTL14</i> | AACCACCACTGGAAGAATAC      | GAAACACAAATGACCTTGGG      | 58                         |
| <i>WTAP</i>    | CCGCAGAGTTCACAATGACGAA    | CCCTCCAAAGCTTGCACGTA      | 58                         |
| <i>ZC3H13</i>  | CCTTCAAGGCACCGATCTCC      | TAGTTTCATCCCGCCTTTCGT     | 58                         |
| <i>RBM15</i>   | TATGGTAAAGCCACTCCAACCAC   | CCGCATCCAAGCTCTCGT        | 58                         |
| <i>VIRMA</i>   | CTCCAAGCTATACGCGACCT      | CTCGTTTGCACCATCGGACT      | 58                         |
| <i>GAPDH</i>   | GGTAGTGAAGGCTGCTGCTGATG   | CCACCACACGGTTGCTGTATCC    | 52-63                      |
| <i>PFKM</i>    | CGCCGCCTACATCTACGA        | GATTCCCTTCCCTCCTC         | 60                         |
| <i>MYOZ1</i>   | GGAACGAGCGATGGGTAT        | AGGTATTGGGGTTCTGTTGA      | 60                         |
| <i>MYBPC1</i>  | GGCATTTCCAAACCAAGTA       | ACAACATAGCCATCTAAACCTG    | 60                         |
| <i>MYOM2</i>   | CAAAGAGTCAACGCACAGGT      | GCAGATGGGACAACAACAGT      | 60                         |
| <i>KCNQ1</i>   | TTATCCATCAGCACCATGC       | CGGAGGACCAGACCTACTTT      | 60                         |
| <i>GAS2</i>    | CTCCTTCGCCCTCACCAA        | CCAACACGGACCATCACG        | 60                         |
