# Supplementary material for: Profiling Analysis of N6-Methyladenosine mRNA Methylation Reveals Differential m6A Patterns during the Embryonic Skeletal Muscle Development of Ducks
Source: Animals (Basel). 2022 Sep 28;12(19):2593. doi: 10.3390/ani12192593 (PMC9559603; doi:10.3390/ani12192593)
Supplement: Supplementary file 1 [file animals-12-02593-s001.zip]

Archive with 19 entries (19 files):
- Figure S1.pdf
- Figure S2.pdf
- Table S1.pdf
- Table S10.xls
- Table S11.xls
- Table S12.xls
- Table S13.xls
- Table S14.xls
- Table S15.xls
- Table S16.xls
- Table S17.xls
- Table S2.xls
- Table S3.xls
- Table S4.xls
- Table S5.xls
- Table S6.xls
- Table S7.xls
- Table S8.xls
- Table S9.xlsx
