# Supplementary material for: Profiling Analysis of N6-Methyladenosine mRNA Methylation Reveals Differential m6A Patterns during the Embryonic Skeletal Muscle Development of Ducks
Source: Animals (Basel). 2022 Sep 28;12(19):2593. doi: 10.3390/ani12192593 (PMC9559603; doi:10.3390/ani12192593)
Supplement: Supplementary file 1 [file animals-12-02593-s001.zip › Table S2.xls]

Geneid	Treat:GeneID	Treat:Chr	Treat:Start	Treat:End	Treat:PeakID	Treat:Length	Treat:Strand	Treat:Annotation	Treat:Annotated_Transcript	Control:GeneID	Control:Chr	Control:Start	Control:End	Control:PeakID	Control:Length	Control:Strand	Control:Annotation	Control:Annotated_Transcript
ND4	ND4	NC_009684.1	12019	12499	peak_10	481	+	cds	gene-ND4.trans	ND4	NC_009684.1	11301	11781	peak_11	481	+	cds	gene-ND4.trans
FAM181B	FAM181B	NC_040046.1	6010082	6010231	peak_100	150	+	utr3	rna-XM_027467026.1	FAM181B	NC_040046.1	6009993	6010202	peak_99	210	+	utr3	rna-XM_027467026.1
RANGAP1	RANGAP1	NC_040046.1	160853141	160855079	peak_1000	1939	+	PR_intron	rna-XM_027454119.1	RANGAP1	NC_040046.1	160844352	160844648	peak_1086	297	+	PR_intron	rna-XM_027454123.1
UCHL5	UCHL5	NC_040053.1	28294615	28298277	peak_10000	3663	-	PR_intron	rna-XM_027463263.1	UCHL5	NC_040053.1	28294675	28298307	peak_10445	3633	-	PR_intron	rna-XM_027463263.1
GLRX2	GLRX2	NC_040053.1	28326850	28327736	peak_10001	887	-	PR_intron	rna-XM_013104681.3	GLRX2	NC_040053.1	28326850	28327028	peak_10446	179	-	utr3	rna-XM_013104681.3
CDC73	CDC73	NC_040053.1	28384479	28384780	peak_10002	302	-	PR_intron	rna-XM_027463262.1	CDC73	NC_040053.1	28331367	28331547	peak_10135	181	+	utr5	rna-XM_027463262.1
KCNT2	KCNT2	NC_040053.1	29195003	29195574	peak_10005	572	-	utr3	rna-XM_027462476.1	KCNT2	NC_040053.1	29194974	29195574	peak_10450	601	-	utr3	rna-XM_027462476.1
ASPM	ASPM	NC_040053.1	29546968	29547179	peak_10008	212	-	cds	rna-XM_027463333.1	ASPM	NC_040053.1	29526200	29526777	peak_10452	578	-	PR_intron	rna-XM_027463333.1
ZBTB41	ZBTB41	NC_040053.1	29555481	29556202	peak_10009	722	-	cds	rna-XM_005027307.4	ZBTB41	NC_040053.1	29555541	29556082	peak_10458	542	-	cds	rna-XM_005027307.4
DENND1B	DENND1B	NC_040053.1	29702795	29702945	peak_10011	151	-	cds	rna-XM_027463101.1	DENND1B	NC_040053.1	29719634	29723991	peak_10461	4358	-	PR_intron	rna-XM_027463101.1
ZNF281	ZNF281	NC_040053.1	30726739	30727099	peak_10013	361	-	cds	rna-XM_005027317.4	ZNF281	NC_040053.1	30726709	30727189	peak_10462	481	-	cds	rna-XM_005027317.4
KIF14	KIF14	NC_040053.1	30780918	30782510	peak_10017	1593	-	PR_intron	rna-XM_021277406.2	KIF14	NC_040053.1	30771885	30772125	peak_10466	241	-	cds	rna-XM_021277406.2
DDX59	DDX59	NC_040053.1	30822833	30823072	peak_10020	240	-	cds	rna-XM_027463674.1	DDX59	NC_040053.1	30822803	30823102	peak_10472	300	-	cds	rna-XM_027463674.1
STXBP3	STXBP3	NC_040053.1	31026732	31028887	peak_10023	2156	-	PR_intron	rna-XM_005028545.4	STXBP3	NC_040053.1	31026732	31028887	peak_10476	2156	-	PR_intron	rna-XM_005028545.4
PRPF38B	PRPF38B	NC_040053.1	31048344	31048464	peak_10025	121	-	utr3	rna-XM_013107741.2	PRPF38B	NC_040053.1	31049148	31050431	peak_10478	1284	-	cds	rna-XM_013107741.2
NTNG1	NTNG1	NC_040053.1	31360015	31360285	peak_10027	271	-	utr3	rna-XM_027463285.1	NTNG1	NC_040053.1	31359985	31360285	peak_10479	301	-	utr3	rna-XM_027463285.1
RNPC3	RNPC3	NC_040053.1	32485037	32488237	peak_10030	3201	-	PR_intron	rna-XM_027462572.1	RNPC3	NC_040053.1	32485037	32488267	peak_10480	3231	-	PR_intron	rna-XM_027462572.1
S1PR1	S1PR1	NC_040053.1	33162864	33163165	peak_10031	302	-	utr3	rna-XM_027462587.1	S1PR1	NC_040053.1	33162864	33163135	peak_10481	272	-	utr3	rna-XM_027462587.1
TRMT13	TRMT13	NC_040053.1	33443736	33444442	peak_10037	707	-	PR_intron	rna-XM_027463039.1	TRMT13	NC_040053.1	33443878	33444442	peak_10484	565	-	PR_intron	rna-XM_027463039.1
MFSD14A	MFSD14A	NC_040053.1	33459502	33459741	peak_10038	240	-	cds	rna-XM_027463054.1	MFSD14A	NC_040053.1	33459502	33459711	peak_10485	210	-	cds	rna-XM_027463054.1
SLC35A3	SLC35A3	NC_040053.1	33478266	33478536	peak_10039	271	-	utr3	rna-XM_027463052.1	SLC35A3	NC_040053.1	33478266	33478566	peak_10486	301	-	utr3	rna-XM_027463052.1
PALMD	PALMD	NC_040053.1	33645182	33645511	peak_10040	330	-	utr3	rna-XM_021271848.2	PALMD	NC_040053.1	33645242	33645452	peak_10487	211	-	utr3	rna-XM_021271848.2
RWDD3	RWDD3	NC_040053.1	34918973	34920004	peak_10043	1032	-	PR_intron	rna-XM_027463087.1	RWDD3	NC_040053.1	34919793	34920034	peak_10491	242	-	cds	rna-XM_027463087.1
LOC101802937	LOC101802937	NC_040053.1	34933018	34933289	peak_10044	272	-	utr3	rna-XM_027462351.1	LOC101802937	NC_040053.1	34933048	34933259	peak_10492	212	-	utr3	rna-XM_027462351.1
LOC101802620	LOC101802620	NC_040053.1	34941894	34942074	peak_10045	181	-	utr3	rna-XM_027462352.1	LOC101802620	NC_040053.1	34941924	34941984	peak_10493	61	-	utr3	rna-XM_027462352.1
ABCD3	ABCD3	NC_040053.1	35164916	35164977	peak_10046	62	-	utr3	rna-XM_005018721.3	ABCD3	NC_040053.1	35164886	35165813	peak_10496	928	-	PR_intron	rna-XM_005018721.3
FNBP1L	FNBP1L	NC_040053.1	35497410	35497621	peak_10049	212	-	utr3	rna-XM_027462627.1	FNBP1L	NC_040053.1	35497440	35497621	peak_10498	182	-	utr3	rna-XM_027462627.1
PPP1R12A	PPP1R12A	NC_040046.1	161470269	161470389	peak_1005	121	+	utr5	rna-XM_027454343.1	PPP1R12A	NC_040046.1	161470239	161470389	peak_1090	151	+	utr5	rna-XM_027454361.1
DR1	DR1	NC_040053.1	35558659	35558779	peak_10053	121	-	utr3	rna-XM_005026565.4	DR1	NC_040053.1	35558630	35558779	peak_10501	150	-	utr3	rna-XM_005026565.4
CCDC18	CCDC18	NC_040053.1	35585027	35587003	peak_10055	1977	-	PR_intron	rna-XM_005026544.4	CCDC18	NC_040053.1	35579897	35581619	peak_10503	1723	-	PR_intron	rna-XM_027462541.1
MTF2	MTF2	NC_040053.1	35621499	35623974	peak_10057	2476	-	NP_intron	rna-XR_003498712.1	MTF2	NC_040053.1	35621499	35623974	peak_10508	2476	-	NP_intron	rna-XR_003498712.1
RPL5	RPL5	NC_040053.1	35683850	35686563	peak_10058	2714	-	PR_intron	rna-XM_027462554.1	RPL5	NC_040053.1	35683850	35686563	peak_10509	2714	-	PR_intron	rna-XM_027462554.1
RPAP2	RPAP2	NC_040053.1	35836382	35836473	peak_10060	92	-	cds	rna-XM_027462912.1	RPAP2	NC_040053.1	35807917	35825669	peak_10510	17753	-	PR_intron	rna-XM_027462912.1
KIAA1107	KIAA1107	NC_040053.1	35888966	35889057	peak_10062	92	-	cds	rna-XM_027463473.1	KIAA1107	NC_040053.1	35885013	35885134	peak_10514	122	-	utr3	rna-XM_027463473.1
CDC7	CDC7	NC_040053.1	36173635	36173814	peak_10064	180	-	cds	rna-XM_027463430.1	CDC7	NC_040053.1	36173575	36173755	peak_10520	181	-	cds	rna-XM_027463430.1
GYG1	GYG1	NC_040054.1	19174	19355	peak_10065	182	+	utr3	rna-XM_027464529.1	GYG1	NC_040054.1	19234	19295	peak_10522	62	+	utr3	rna-XM_027464529.1
HPS3	HPS3	NC_040054.1	30714	30983	peak_10066	270	+	cds	rna-XM_027464525.1	HPS3	NC_040054.1	29804	30864	peak_10524	1061	+	PR_intron	rna-XM_027464525.1
c689d38c-2033-4e6e-8155-7fd7bebbdbcc	c689d38c-2033-4e6e-8155-7fd7bebbdbcc	NC_040054.1	47441	47829	peak_10067	389	+	NP_exon	c689d38c-2033-4e6e-8155-7fd7bebbdbcc.trans	c689d38c-2033-4e6e-8155-7fd7bebbdbcc	NC_040054.1	47381	47799	peak_10525	419	+	NP_exon	c689d38c-2033-4e6e-8155-7fd7bebbdbcc.trans
TSC22D2	TSC22D2	NC_040054.1	347371	347641	peak_10069	271	+	cds	rna-XM_027464688.1	TSC22D2	NC_040054.1	347281	347641	peak_10527	361	+	cds	rna-XM_027464688.1
MED12L	MED12L	NC_040054.1	566120	567453	peak_10073	1334	+	PR_intron	rna-XM_027464580.1	MED12L	NC_040054.1	556599	559795	peak_10530	3197	+	PR_intron	rna-XM_027464580.1
MBNL1	MBNL1	NC_040054.1	719964	720084	peak_10074	121	+	PR_intron	rna-XM_027464633.1	MBNL1	NC_040054.1	720023	720114	peak_10532	92	+	PR_intron	rna-XM_027464633.1
P2RY1	P2RY1	NC_040054.1	791079	791199	peak_10076	121	+	cds	rna-XM_027464296.1	P2RY1	NC_040054.1	791079	791229	peak_10533	151	+	cds	rna-XM_027464296.1
RAP2B	RAP2B	NC_040054.1	835889	836649	peak_10078	761	+	cds	rna-XM_021275190.2	RAP2B	NC_040054.1	835889	836649	peak_10534	761	+	cds	rna-XM_021275190.2
ARHGEF26	ARHGEF26	NC_040054.1	968853	971817	peak_10079	2965	+	PR_intron	rna-XM_027464549.1	ARHGEF26	NC_040054.1	1008594	1008714	peak_10535	121	+	cds	rna-XM_027464549.1
GMPS	GMPS	NC_040054.1	1290243	1292899	peak_10081	2657	+	PR_intron	rna-XM_027464497.1	GMPS	NC_040054.1	1313754	1313965	peak_10538	212	+	utr3	rna-XM_027464497.1
KCNAB1	KCNAB1	NC_040054.1	1336976	1337036	peak_10083	61	+	utr5	rna-XM_027464505.1	KCNAB1	NC_040054.1	1336976	1337126	peak_10539	151	+	utr5	rna-XM_027464505.1
TIPARP	TIPARP	NC_040054.1	1404557	1405660	peak_10085	1104	+	PR_intron	rna-XM_027464500.1	TIPARP	NC_040054.1	1404528	1405660	peak_10540	1133	+	PR_intron	rna-XM_027464500.1
LEKR1	LEKR1	NC_040054.1	1467532	1467683	peak_10086	152	+	cds	rna-XM_027464536.1	LEKR1	NC_040054.1	1472822	1473907	peak_10541	1086	+	PR_intron	rna-XM_027464536.1
VEPH1	VEPH1	NC_040054.1	1581863	1582281	peak_10087	419	+	PR_intron	rna-XM_027464372.1	VEPH1	NC_040054.1	1581863	1582430	peak_10543	568	+	PR_intron	rna-XM_027464372.1
RSRC1	RSRC1	NC_040054.1	1716959	1845269	peak_10088	128311	+	PR_intron	rna-XM_027464117.1	RSRC1	NC_040054.1	1709668	1710032	peak_10544	365	+	PR_intron	rna-XM_027464118.1
GFM1	GFM1	NC_040054.1	1896372	1896463	peak_10089	92	+	utr3	rna-XM_027463905.1	GFM1	NC_040054.1	1887206	1888037	peak_10779	832	-	PR_intron	rna-XM_027463905.1
LOC101802576	LOC101802576	NC_040054.1	2076209	2081694	peak_10090	5486	+	PR_intron	rna-XM_027464717.1	LOC101802576	NC_040054.1	2076238	2081694	peak_10548	5457	+	PR_intron	rna-XM_027464717.1
SMC4	SMC4	NC_040054.1	2210584	2212511	peak_10092	1928	+	PR_intron	rna-XM_027464720.1	SMC4	NC_040054.1	2210554	2212452	peak_10550	1899	+	PR_intron	rna-XM_027464720.1
MYNN	MYNN	NC_040054.1	4699937	4700178	peak_10098	242	+	cds	rna-XM_027463988.1	MYNN	NC_040054.1	4699668	4700178	peak_10557	511	+	cds	rna-XM_027463988.1
PRSS23	PRSS23	NC_040046.1	7288982	7289282	peak_101	301	+	cds	rna-XM_021277653.2	PRSS23	NC_040046.1	7288952	7289282	peak_101	331	+	cds	rna-XM_021277653.2
PAWR	PAWR	NC_040046.1	161647037	161647127	peak_1010	91	+	cds	rna-XM_027454386.1	PAWR	NC_040046.1	161609090	161678143	peak_1095	69054	+	PR_intron	rna-XM_027454386.1
SEC62	SEC62	NC_040054.1	4783430	4790644	peak_10100	7215	+	PR_intron	rna-XM_027464260.1	SEC62	NC_040054.1	4783430	4790644	peak_10559	7215	+	PR_intron	rna-XM_027464260.1
SKIL	SKIL	NC_040054.1	4877182	4877273	peak_10104	92	+	cds	rna-XM_027464258.1	SKIL	NC_040054.1	4876522	4876763	peak_10561	242	+	cds	rna-XM_027464258.1
FNDC3B	FNDC3B	NC_040054.1	5356326	5380878	peak_10109	24553	+	PR_intron	rna-XM_027464790.1	FNDC3B	NC_040054.1	5356356	5380878	peak_10566	24523	+	PR_intron	rna-XM_027464790.1
NLGN1	NLGN1	NC_040054.1	6075103	6075164	peak_10113	62	+	NP_intron	rna-XR_003499026.1	NLGN1	NC_040054.1	5786006	5786157	peak_10569	152	+	cds	rna-XM_027463956.1
NAALADL2	NAALADL2	NC_040054.1	6296620	6296771	peak_10114	152	+	cds	rna-XM_027463880.1	NAALADL2	NC_040054.1	6284895	6296801	peak_10572	11907	+	PR_intron	rna-XM_027463880.1
PIK3CA	PIK3CA	NC_040054.1	7385156	7385217	peak_10116	62	+	utr5	rna-XM_027464233.1	PIK3CA	NC_040054.1	7380901	7385336	peak_10574	4436	+	PR_intron	rna-XM_027464233.1
ZNF639	ZNF639	NC_040054.1	7419692	7420441	peak_10118	750	+	cds	rna-XM_027464237.1	ZNF639	NC_040054.1	7419632	7420082	peak_10577	451	+	cds	rna-XM_027464237.1
ACTL6A	ACTL6A	NC_040054.1	7518870	7520000	peak_10119	1131	+	PR_intron	rna-XM_027464519.1	ACTL6A	NC_040054.1	7518870	7519910	peak_10579	1041	+	PR_intron	rna-XM_027464519.1
E2F7	E2F7	NC_040046.1	162903308	162903399	peak_1012	92	+	cds	rna-XM_027454626.1	E2F7	NC_040046.1	162905331	162905422	peak_1097	92	+	cds	rna-XM_027454626.1
NDUFB5	NDUFB5	NC_040054.1	7537083	7538086	peak_10120	1004	+	PR_intron	rna-XM_027464520.1	NDUFB5	NC_040054.1	7536044	7538086	peak_10580	2043	+	PR_intron	rna-XM_027464520.1
USP13	USP13	NC_040054.1	7549372	7560948	peak_10121	11577	+	PR_intron	rna-XM_027464511.1	USP13	NC_040054.1	7549432	7560978	peak_10581	11547	+	PR_intron	rna-XM_027464511.1
TTC14	TTC14	NC_040054.1	7800605	7801317	peak_10124	713	+	PR_intron	rna-XM_027464513.1	TTC14	NC_040054.1	7800605	7802120	peak_10585	1516	+	cds	rna-XM_027464513.1
FXR1	FXR1	NC_040054.1	7897435	7899266	peak_10126	1832	+	PR_intron	rna-XM_027463901.1	FXR1	NC_040054.1	7897465	7898521	peak_10586	1057	+	PR_intron	rna-XM_027463901.1
ATP11B	ATP11B	NC_040054.1	8606290	8607354	peak_10129	1065	+	PR_intron	rna-XM_027464667.1	ATP11B	NC_040054.1	8606290	8606609	peak_10590	320	+	cds	rna-XM_027464667.1
OSBPL8	OSBPL8	NC_040046.1	163118986	163146312	peak_1013	27327	+	PR_intron	rna-XM_027454754.1	OSBPL8	NC_040046.1	163118986	163146312	peak_1099	27327	+	PR_intron	rna-XM_027454754.1
MCF2L2	MCF2L2	NC_040054.1	8768807	8769707	peak_10130	901	+	PR_intron	rna-XM_027464350.1	MCF2L2	NC_040054.1	8768701	8769647	peak_10591	947	+	PR_intron	rna-XM_027464350.1
SENP5	SENP5	NC_040054.1	9016220	9021179	peak_10132	4960	+	PR_intron	rna-XM_027464797.1	SENP5	NC_040054.1	9022216	9026894	peak_10595	4679	+	PR_intron	rna-XM_027464798.1
LOC113844454	LOC113844454	NC_040054.1	9208854	9209245	peak_10136	392	+	cds	rna-XM_027464218.1	LOC113844454	NC_040054.1	9208884	9209215	peak_10597	332	+	cds	rna-XM_027464218.1
CAMK2N2	CAMK2N2	NC_040054.1	9215202	9215321	peak_10137	120	+	utr3	rna-XM_027464230.1	CAMK2N2	NC_040054.1	9215173	9215321	peak_10598	149	+	utr3	rna-XM_027464230.1
ALG3	ALG3	NC_040054.1	9222702	9222851	peak_10138	150	+	utr3	rna-XM_027464215.1	ALG3	NC_040054.1	9222673	9222851	peak_10599	179	+	utr3	rna-XM_027464215.1
ABCC5	ABCC5	NC_040054.1	9342020	9350001	peak_10139	7982	+	PR_intron	rna-XM_027464171.1	ABCC5	NC_040054.1	9342020	9349971	peak_10600	7952	+	PR_intron	rna-XM_027464171.1
RNPEPL1	RNPEPL1	NC_040054.1	9408785	9409850	peak_10141	1066	+	PR_intron	rna-XM_005022427.3	RNPEPL1	NC_040054.1	9409493	9409940	peak_10601	448	+	cds	rna-XM_005022427.3
EIF4E2	EIF4E2	NC_040054.1	9526873	9528933	peak_10142	2061	+	PR_intron	rna-XM_027464222.1	EIF4E2	NC_040054.1	9526873	9528933	peak_10605	2061	+	PR_intron	rna-XM_027464222.1
SLC12A9	SLC12A9	NC_040054.1	9575097	9575368	peak_10143	272	+	cds	rna-XM_027464183.1	SLC12A9	NC_040054.1	9575127	9575368	peak_10606	242	+	cds	rna-XM_027464183.1
NPPC	NPPC	NC_040054.1	9794147	9795493	peak_10144	1347	+	PR_intron	rna-XM_027464223.1	NPPC	NC_040054.1	9795404	9795493	peak_10607	90	+	cds	rna-XM_027464223.1
NMUR1	NMUR1	NC_040054.1	9902582	9903032	peak_10146	451	+	utr5	rna-XM_005010340.4	NMUR1	NC_040054.1	9902672	9903002	peak_10608	331	+	utr5	rna-XM_005010340.4
NCL	NCL	NC_040054.1	9922731	9926035	peak_10147	3305	+	PR_intron	rna-XM_027464162.1	NCL	NC_040054.1	9922731	9926035	peak_10611	3305	+	PR_intron	rna-XM_027464162.1
RUBCN	RUBCN	NC_040054.1	10224720	10224960	peak_10150	241	+	cds	rna-XM_027464141.1	RUBCN	NC_040054.1	10224660	10224900	peak_10614	241	+	cds	rna-XM_027464141.1
LOC106018780	LOC106018780	NC_040054.1	10246039	10246190	peak_10153	152	+	cds	rna-XM_021276051.2	LOC106018780	NC_040054.1	10246039	10246250	peak_10617	212	+	cds	rna-XM_021276051.2
IL1RAP	IL1RAP	NC_040054.1	11445383	11446081	peak_10155	699	+	PR_intron	rna-XM_027464101.1	IL1RAP	NC_040054.1	11445383	11446051	peak_10620	669	+	PR_intron	rna-XM_027464101.1
CCDC50	CCDC50	NC_040054.1	11656247	11656398	peak_10158	152	+	utr5	rna-XM_027463903.1	CCDC50	NC_040054.1	11672090	11682638	peak_10623	10549	+	PR_intron	rna-XM_027463904.1
OPA1	OPA1	NC_040054.1	12316790	12320170	peak_10163	3381	+	PR_intron	rna-XM_027463877.1	OPA1	NC_040054.1	12316790	12316941	peak_10627	152	+	utr5	rna-XM_027463877.1
HES1	HES1	NC_040054.1	12481409	12481469	peak_10166	61	+	cds	rna-XM_027464446.1	HES1	NC_040054.1	12479418	12479567	peak_10629	150	+	utr5	rna-XM_027464446.1
FAM43A	FAM43A	NC_040054.1	12634130	12634399	peak_10167	270	+	cds	rna-XM_027464420.1	FAM43A	NC_040054.1	12634100	12634429	peak_10631	330	+	cds	rna-XM_027464420.1
LOC113844527	LOC113844527	NC_040054.1	12846683	12847039	peak_10170	357	+	NP_exon	gene-LOC113844527.trans	LOC113844527	NC_040054.1	12845321	12845441	peak_10632	121	+	NP_exon	gene-LOC113844527.trans
DLG1	DLG1	NC_040054.1	12978517	12980017	peak_10171	1501	+	PR_intron	rna-XM_027464835.1	DLG1	NC_040054.1	13010971	13011686	peak_10634	716	+	PR_intron	rna-XM_027464835.1
LOC101803486	LOC101803486	NC_040054.1	13204110	13204291	peak_10175	182	+	cds	rna-XM_013094581.3	LOC101803486	NC_040054.1	13203961	13204052	peak_10636	92	+	cds	rna-XM_013094581.3
GPC1	GPC1	NC_040054.1	13758737	13758798	peak_10177	62	+	cds	rna-XM_027464059.1	GPC1	NC_040054.1	13785426	13785845	peak_10639	420	+	cds	rna-XM_027464059.1
DUSP28	DUSP28	NC_040054.1	13796274	13796425	peak_10180	152	+	NP_intron	rna-XR_003499048.1	DUSP28	NC_040054.1	13804112	13809596	peak_10640	5485	+	NP_intron	rna-XR_003499045.1
MAP6D1	MAP6D1	NC_040054.1	13844572	13844752	peak_10181	181	+	utr3	rna-XM_027464307.1	MAP6D1	NC_040054.1	13844572	13844723	peak_10642	152	+	utr3	rna-XM_027464307.1
KLHL6	KLHL6	NC_040054.1	13947525	13947615	peak_10183	91	+	cds	rna-XM_027464248.1	KLHL6	NC_040054.1	13934317	13934496	peak_10644	180	+	cds	rna-XM_027464248.1
ARHGEF4	ARHGEF4	NC_040054.1	14121232	14121442	peak_10184	211	+	cds	rna-XM_005014360.4	ARHGEF4	NC_040054.1	14121262	14121532	peak_10647	271	+	cds	rna-XM_005014360.4
LOC101805157	LOC101805157	NC_040054.1	14424242	14425272	peak_10186	1031	+	PR_intron	rna-XM_027464414.1	LOC101805157	NC_040054.1	14424182	14425074	peak_10649	893	+	PR_intron	rna-XM_027464414.1
ETV5	ETV5	NC_040054.1	14439476	14439834	peak_10189	359	+	utr3	rna-XM_027464419.1	ETV5	NC_040054.1	14439446	14439863	peak_10652	418	+	utr3	rna-XM_027464419.1
BBS10	BBS10	NC_040046.1	163207095	163207186	peak_1019	92	+	cds	rna-XM_027454789.1	BBS10	NC_040046.1	163206322	163206382	peak_1104	61	+	cds	rna-XM_027454789.1
STK25	STK25	NC_040054.1	14493722	14493842	peak_10190	121	+	cds	rna-XM_027464129.1	STK25	NC_040054.1	14493692	14495404	peak_10653	1713	+	PR_intron	rna-XM_027464129.1
HDLBP	HDLBP	NC_040054.1	14634271	14635430	peak_10192	1160	+	PR_intron	rna-XM_027464120.1	HDLBP	NC_040054.1	14634271	14635460	peak_10654	1190	+	PR_intron	rna-XM_027464120.1
MTERF4	MTERF4	NC_040054.1	14698847	14699316	peak_10196	470	+	cds	rna-XM_027464824.1	MTERF4	NC_040054.1	14698876	14699258	peak_10656	383	+	cds	rna-XM_027464824.1
KIF1A	KIF1A	NC_040054.1	14749329	14749770	peak_10197	442	+	PR_intron	rna-XM_027464331.1	KIF1A	NC_040054.1	14741788	14743031	peak_10657	1244	+	PR_intron	rna-XM_027464331.1
ILKAP	ILKAP	NC_040054.1	14770093	14772056	peak_10199	1964	+	PR_intron	rna-XM_027464316.1	ILKAP	NC_040054.1	14770093	14772086	peak_10660	1994	+	PR_intron	rna-XM_027464316.1
NAP1L1	NAP1L1	NC_040046.1	163285588	163286503	peak_1020	916	+	PR_intron	rna-XM_027454852.1	NAP1L1	NC_040046.1	163265646	163266061	peak_1105	416	+	PR_intron	rna-XM_027454866.1
ING5	ING5	NC_040054.1	14852529	14854103	peak_10202	1575	+	PR_intron	rna-XM_027464113.1	ING5	NC_040054.1	14851206	14854867	peak_10663	3662	+	PR_intron	rna-XM_027464113.1
D2HGDH	D2HGDH	NC_040054.1	14867839	14867900	peak_10204	62	+	cds	rna-XM_027464112.1	D2HGDH	NC_040054.1	14867989	14868170	peak_10665	182	+	cds	rna-XM_027464112.1
NEU4	NEU4	NC_040054.1	14884404	14884730	peak_10206	327	+	PR_intron	rna-XM_027464080.1	NEU4	NC_040054.1	14885657	14885837	peak_10666	181	+	utr3	rna-XM_027464080.1
FBXO45	FBXO45	NC_040054.1	14949769	14952281	peak_10207	2513	+	PR_intron	rna-XM_021277856.2	FBXO45	NC_040054.1	14949769	14952281	peak_10667	2513	+	PR_intron	rna-XM_021277856.2
PAK2	PAK2	NC_040054.1	15024792	15024942	peak_10210	151	+	utr3	rna-XM_027464818.1	PAK2	NC_040054.1	15024672	15024733	peak_10672	62	+	utr3	rna-XM_027464818.1
SRPRB	SRPRB	NC_040054.1	15082767	15083093	peak_10212	327	+	cds	rna-XM_027464050.1	SRPRB	NC_040054.1	15081658	15083064	peak_10674	1407	+	PR_intron	rna-XM_027464050.1
SENP2	SENP2	NC_040054.1	15252528	15253436	peak_10213	909	+	PR_intron	rna-XM_027463958.1	SENP2	NC_040054.1	15264847	15264938	peak_10675	92	+	utr3	rna-XM_027463958.1
CFAP410	CFAP410	NC_040054.1	15314625	15318915	peak_10216	4291	+	PR_intron	rna-XM_027464569.1	CFAP410	NC_040054.1	15314625	15318915	peak_10676	4291	+	PR_intron	rna-XM_027464569.1
KY	KY	NC_040054.1	16070018	16070169	peak_10217	152	+	utr3	rna-XM_013099363.3	KY	NC_040054.1	16069748	16069809	peak_10680	62	+	utr3	rna-XM_013099363.3
ANAPC13	ANAPC13	NC_040054.1	16094752	16097445	peak_10218	2694	+	PR_intron	rna-XM_005019380.4	ANAPC13	NC_040054.1	16094345	16097415	peak_10682	3071	+	PR_intron	rna-XM_005019380.4
C9H3orf70	C9H3orf70	NC_040054.1	16243497	16244004	peak_10219	508	+	cds	rna-XM_027464024.1	C9H3orf70	NC_040054.1	16243407	16244123	peak_10683	717	+	cds	rna-XM_027464024.1
179d88d0-a560-4b65-a55e-2ef71f13bab0	179d88d0-a560-4b65-a55e-2ef71f13bab0	NC_040046.1	163302062	163302266	peak_1022	205	+	NP_exon	179d88d0-a560-4b65-a55e-2ef71f13bab0.trans	179d88d0-a560-4b65-a55e-2ef71f13bab0	NC_040046.1	163302062	163302295	peak_1108	234	+	NP_exon	179d88d0-a560-4b65-a55e-2ef71f13bab0.trans
PPP2R3A	PPP2R3A	NC_040054.1	16420323	16425541	peak_10221	5219	+	PR_intron	rna-XM_027464015.1	PPP2R3A	NC_040054.1	16419993	16420204	peak_10685	212	+	cds	rna-XM_027464015.1
SLC35G2	SLC35G2	NC_040054.1	16695444	16695847	peak_10225	404	+	PR_intron	rna-XM_027464387.1	SLC35G2	NC_040054.1	16695473	16695877	peak_10689	405	+	PR_intron	rna-XM_027464387.1
LOC101804575	LOC101804575	NC_040054.1	16710030	16711255	peak_10227	1226	+	cds	rna-XM_027464097.1	LOC101804575	NC_040054.1	16710030	16711315	peak_10692	1286	+	cds	rna-XM_027464097.1
GIGYF2	GIGYF2	NC_040054.1	16818909	16851953	peak_10229	33045	+	PR_intron	rna-XM_027464460.1	GIGYF2	NC_040054.1	16812494	16851409	peak_10695	38916	+	PR_intron	rna-XM_027464460.1
NEU2	NEU2	NC_040054.1	16948129	16948249	peak_10237	121	+	cds	rna-XM_027464489.1	NEU2	NC_040054.1	16948099	16948279	peak_10703	181	+	cds	rna-XM_027464489.1
INPP5D	INPP5D	NC_040054.1	17002623	17005161	peak_10238	2539	+	PR_intron	rna-XM_021278825.2	INPP5D	NC_040054.1	17003976	17004246	peak_10704	271	+	cds	rna-XM_021278825.2
ATG16L1	ATG16L1	NC_040054.1	17032781	17033140	peak_10240	360	+	utr3	rna-XM_013108719.2	ATG16L1	NC_040054.1	17032781	17033110	peak_10705	330	+	utr3	rna-XM_013108719.2
DGKD	DGKD	NC_040054.1	17079390	17085491	peak_10241	6102	+	PR_intron	rna-XM_005029781.4	DGKD	NC_040054.1	17116881	17117151	peak_10706	271	+	utr3	rna-XM_005029781.4
LOC101797199	LOC101797199	NC_040054.1	17143245	17143574	peak_10245	330	+	cds	rna-XM_027464483.1	LOC101797199	NC_040054.1	17143364	17143634	peak_10708	271	+	cds	rna-XM_027464483.1
SFT2D3	SFT2D3	NC_040054.1	17255628	17255898	peak_10247	271	+	utr5	rna-XM_027464493.1	SFT2D3	NC_040054.1	17255628	17255898	peak_10709	271	+	utr5	rna-XM_027464493.1
WDR33	WDR33	NC_040054.1	17264761	17264882	peak_10249	122	+	PR_intron	rna-XM_027464457.1	WDR33	NC_040054.1	17265568	17265718	peak_10711	151	+	PR_intron	rna-XM_027464457.1
UGGT1	UGGT1	NC_040054.1	17413301	17413997	peak_10250	697	+	PR_intron	rna-XM_027463887.1	UGGT1	NC_040054.1	17412905	17413968	peak_10712	1064	+	PR_intron	rna-XM_027463887.1
COPS9	COPS9	NC_040054.1	18132248	18133350	peak_10251	1103	+	PR_intron	rna-XM_027464072.1	COPS9	NC_040054.1	18132248	18133350	peak_10714	1103	+	PR_intron	rna-XM_027464072.1
ST6GAL1	ST6GAL1	NC_040054.1	18198048	18199087	peak_10253	1040	+	PR_intron	rna-XM_013108069.3	ST6GAL1	NC_040054.1	18192812	18193142	peak_10716	331	+	PR_intron	rna-XM_027464678.1
LOC101805234	LOC101805234	NC_040054.1	18468424	18468713	peak_10254	290	+	cds	rna-XM_027464416.1	LOC101805234	NC_040054.1	18468424	18468742	peak_10718	319	+	cds	rna-XM_027464416.1
MRPS22	MRPS22	NC_040054.1	18895424	18895847	peak_10256	424	+	PR_intron	rna-XM_027464165.1	MRPS22	NC_040054.1	18895424	18895817	peak_10720	394	+	PR_intron	rna-XM_027464165.1
CLSTN2	CLSTN2	NC_040054.1	19468347	19469458	peak_10257	1112	+	PR_intron	rna-XM_027464574.1	CLSTN2	NC_040054.1	19468377	19469458	peak_10721	1082	+	PR_intron	rna-XM_027464574.1
PXYLP1	PXYLP1	NC_040054.1	19983012	20013588	peak_10258	30577	+	PR_intron	rna-XM_013102097.2	PXYLP1	NC_040054.1	19983012	20013558	peak_10722	30547	+	PR_intron	rna-XM_013102097.2
KRR1	KRR1	NC_040046.1	163424400	163426871	peak_1026	2472	+	PR_intron	rna-XM_027455023.1	KRR1	NC_040046.1	163424430	163426661	peak_1112	2232	+	PR_intron	rna-XM_027455023.1
MOGAT1	MOGAT1	NC_040054.1	21322008	21322069	peak_10261	62	+	utr3	rna-XM_005026421.3	MOGAT1	NC_040054.1	21321978	21322129	peak_10725	152	+	utr3	rna-XM_005026421.3
ACSL3	ACSL3	NC_040054.1	21345450	21345721	peak_10262	272	+	PR_intron	rna-XM_005026417.4	ACSL3	NC_040054.1	21345420	21356054	peak_10726	10635	+	PR_intron	rna-XM_005026417.4
KCNE4	KCNE4	NC_040054.1	21419621	21419772	peak_10266	152	+	cds	rna-XM_021276891.2	KCNE4	NC_040054.1	21420131	21420252	peak_10729	122	+	utr3	rna-XM_021276891.2
LOC101796516	LOC101796516	NC_040054.1	21805541	21806106	peak_10268	566	+	PR_intron	rna-XM_027464423.1	LOC101796516	NC_040054.1	21821713	21821803	peak_10731	91	+	cds	rna-XM_027464430.1
CCDC107	CCDC107	NC_040046.1	163472308	163473449	peak_1027	1142	+	PR_intron	rna-XM_027455098.1	CCDC107	NC_040046.1	163472308	163473449	peak_1114	1142	+	PR_intron	rna-XM_027455098.1
COL4A3	COL4A3	NC_040054.1	22817754	22818048	peak_10270	295	+	PR_intron	rna-XM_027464711.1	COL4A3	NC_040054.1	22818047	22820013	peak_10734	1967	+	PR_intron	rna-XM_027464711.1
AGFG1	AGFG1	NC_040054.1	22938082	22938143	peak_10271	62	+	utr3	rna-XM_027464615.1	AGFG1	NC_040054.1	22937993	22938172	peak_10736	180	+	utr3	rna-XM_027464615.1
ZBTB38	ZBTB38	NC_040054.1	23744740	23745070	peak_10272	331	+	cds	rna-XM_027464768.1	ZBTB38	NC_040054.1	23747341	23747432	peak_10738	92	+	cds	rna-XM_027464768.1
GRK7	GRK7	NC_040054.1	23824261	23824531	peak_10278	271	+	cds	rna-XM_027463918.1	GRK7	NC_040054.1	23824231	23824650	peak_10741	420	+	cds	rna-XM_027463918.1
ATP1B3	ATP1B3	NC_040054.1	23890711	23890891	peak_10280	181	+	utr3	rna-XM_027463940.1	ATP1B3	NC_040054.1	23890711	23890891	peak_10744	181	+	utr3	rna-XM_027463940.1
TRPC1	TRPC1	NC_040054.1	24125410	24125620	peak_10282	211	+	cds	rna-XM_027464106.1	TRPC1	NC_040054.1	24125410	24125650	peak_10745	241	+	cds	rna-XM_027464106.1
U2SURP	U2SURP	NC_040054.1	24201339	24217531	peak_10283	16193	+	PR_intron	rna-XM_027464792.1	U2SURP	NC_040054.1	24201339	24213351	peak_10746	12013	+	PR_intron	rna-XM_027464792.1
CHST2	CHST2	NC_040054.1	24257338	24257578	peak_10287	241	+	cds	rna-XM_027464796.1	CHST2	NC_040054.1	24257308	24257578	peak_10751	271	+	cds	rna-XM_027464796.1
WWTR1	WWTR1	NC_040054.1	135991	136112	peak_10292	122	-	utr3	rna-XM_027463969.1	WWTR1	NC_040054.1	137453	137812	peak_10755	360	-	utr3	rna-XM_027463969.1
PFN2	PFN2	NC_040054.1	245770	247631	peak_10296	1862	-	PR_intron	rna-XM_027464740.1	PFN2	NC_040054.1	245770	247601	peak_10758	1832	-	PR_intron	rna-XM_027464740.1
ERICH6	ERICH6	NC_040054.1	407374	407494	peak_10298	121	-	cds	rna-XM_027464264.1	ERICH6	NC_040054.1	415741	415802	peak_10760	62	-	utr5	rna-XM_027464264.1
SIAH2	SIAH2	NC_040054.1	416804	416894	peak_10299	91	-	utr3	rna-XM_027464534.1	SIAH2	NC_040054.1	418347	418734	peak_10761	388	-	cds	rna-XM_027464534.1
FAT3	FAT3	NC_040046.1	9424914	9425154	peak_103	241	+	cds	rna-XM_027467294.1	FAT3	NC_040046.1	9424944	9425214	peak_104	271	+	cds	rna-XM_027467294.1
IGSF10	IGSF10	NC_040054.1	588222	588343	peak_10304	122	-	cds	rna-XM_027464578.1	IGSF10	NC_040054.1	586633	586784	peak_10764	152	-	utr3	rna-XM_027464578.1
DHX36	DHX36	NC_040054.1	1018978	1020145	peak_10307	1168	-	PR_intron	rna-XM_027464548.1	DHX36	NC_040054.1	1019008	1020145	peak_10769	1138	-	PR_intron	rna-XM_027464548.1
PLCH1	PLCH1	NC_040054.1	1207750	1207841	peak_10310	92	-	cds	rna-XM_021275196.2	PLCH1	NC_040054.1	1207720	1207841	peak_10771	122	-	cds	rna-XM_021275196.2
C9H3orf33	C9H3orf33	NC_040054.1	1274790	1274999	peak_10312	210	-	cds	rna-XM_027464551.1	C9H3orf33	NC_040054.1	1274820	1275029	peak_10774	210	-	cds	rna-XM_027464551.1
SLC33A1	SLC33A1	NC_040054.1	1281296	1281896	peak_10313	601	-	utr3	rna-XM_027464504.1	SLC33A1	NC_040054.1	1281266	1281866	peak_10775	601	-	utr3	rna-XM_027464504.1
CCNL1	CCNL1	NC_040054.1	1494063	1496038	peak_10314	1976	-	PR_intron	rna-XM_027464007.1	CCNL1	NC_040054.1	1494063	1495979	peak_10776	1917	-	PR_intron	rna-XM_027464007.1
SHOX2	SHOX2	NC_040054.1	1703508	1703895	peak_10317	388	-	utr3	rna-XM_027464587.1	SHOX2	NC_040054.1	1703448	1703895	peak_10778	448	-	utr3	rna-XM_027464587.1
CARD8	CARD8	NC_040054.1	2136072	2137611	peak_10319	1540	-	PR_intron	rna-XM_027464383.1	CARD8	NC_040054.1	2135105	2135196	peak_10780	92	-	utr3	rna-XM_027464383.1
82b682c0-352c-4cbc-a160-38290f9456ed	82b682c0-352c-4cbc-a160-38290f9456ed	NC_040046.1	163623486	163623756	peak_1032	271	+	NP_exon	82b682c0-352c-4cbc-a160-38290f9456ed.trans	82b682c0-352c-4cbc-a160-38290f9456ed	NC_040046.1	163623516	163623726	peak_1116	211	+	NP_exon	82b682c0-352c-4cbc-a160-38290f9456ed.trans
IFT80	IFT80	NC_040054.1	2209888	2210250	peak_10320	363	-	PR_intron	rna-XM_027464135.1	IFT80	NC_040054.1	2209829	2209979	peak_10782	151	-	utr5	rna-XM_027464134.1
TRIM59	TRIM59	NC_040054.1	2248261	2248500	peak_10321	240	-	cds	rna-XM_027464721.1	TRIM59	NC_040054.1	2248261	2248500	peak_10783	240	-	cds	rna-XM_027464721.1
KPNA4	KPNA4	NC_040054.1	2262483	2262663	peak_10323	181	-	utr3	rna-XM_027464724.1	KPNA4	NC_040054.1	2262483	2262693	peak_10785	211	-	utr3	rna-XM_027464724.1
PPM1L	PPM1L	NC_040054.1	2321609	2321910	peak_10325	302	-	cds	rna-XM_027464654.1	PPM1L	NC_040054.1	2321669	2321970	peak_10787	302	-	cds	rna-XM_027464654.1
NMD3	NMD3	NC_040054.1	2414198	2416481	peak_10328	2284	-	PR_intron	rna-XM_027464661.1	NMD3	NC_040054.1	2414258	2416511	peak_10789	2254	-	PR_intron	rna-XM_027464661.1
SLITRK3	SLITRK3	NC_040054.1	3396602	3396753	peak_10329	152	-	cds	rna-XM_027464088.1	SLITRK3	NC_040054.1	3395673	3395884	peak_10791	212	-	cds	rna-XM_027464088.1
BCHE	BCHE	NC_040054.1	3526856	3530913	peak_10330	4058	-	PR_intron	rna-XM_013102108.2	BCHE	NC_040054.1	3526915	3530913	peak_10794	3999	-	PR_intron	rna-XM_013102108.2
GOLIM4	GOLIM4	NC_040054.1	4069510	4081226	peak_10333	11717	-	PR_intron	rna-XM_005020781.3	GOLIM4	NC_040054.1	4069510	4078329	peak_10797	8820	-	PR_intron	rna-XM_005020779.3
MECOM	MECOM	NC_040054.1	4364633	4368552	peak_10337	3920	-	PR_intron	rna-XM_027464538.1	MECOM	NC_040054.1	4365638	4368493	peak_10799	2856	-	PR_intron	rna-XM_027464538.1
ZFC3H1	ZFC3H1	NC_040046.1	164843533	164851332	peak_1034	7800	+	PR_intron	rna-XM_027455579.1	ZFC3H1	NC_040046.1	164843563	164851046	peak_1120	7484	+	PR_intron	rna-XM_027455579.1
PHC3	PHC3	NC_040054.1	4816773	4816924	peak_10341	152	-	cds	rna-XM_027464252.1	PHC3	NC_040054.1	4820633	4820848	peak_10804	216	-	PR_intron	rna-XM_027464252.1
RPL22L1	RPL22L1	NC_040054.1	4969451	4969511	peak_10344	61	-	utr5	rna-XM_027464375.1	RPL22L1	NC_040054.1	4969451	4969511	peak_10806	61	-	utr5	rna-XM_027464375.1
TNIK	TNIK	NC_040054.1	4994279	4996572	peak_10345	2294	-	PR_intron	rna-XM_027464539.1	TNIK	NC_040054.1	4994428	4994548	peak_10807	121	-	utr3	rna-XM_027464539.1
PLD1	PLD1	NC_040054.1	5148849	5149239	peak_10348	391	-	utr3	rna-XM_027463946.1	PLD1	NC_040054.1	5148820	5148910	peak_10811	91	-	utr3	rna-XM_027463946.1
e52d0119-c13a-4e50-baa5-40ad0b36e494	e52d0119-c13a-4e50-baa5-40ad0b36e494	NC_040054.1	5152585	5152974	peak_10350	390	-	NP_exon	e52d0119-c13a-4e50-baa5-40ad0b36e494.trans	e52d0119-c13a-4e50-baa5-40ad0b36e494	NC_040054.1	5152555	5152974	peak_10814	420	-	NP_exon	e52d0119-c13a-4e50-baa5-40ad0b36e494.trans
TNFSF10	TNFSF10	NC_040054.1	5464686	5465075	peak_10354	390	-	cds	rna-XM_027464732.1	TNFSF10	NC_040054.1	5464656	5465075	peak_10819	420	-	cds	rna-XM_027464732.1
NCEH1	NCEH1	NC_040054.1	5496812	5497082	peak_10355	271	-	cds	rna-XM_027464730.1	NCEH1	NC_040054.1	5496782	5497111	peak_10820	330	-	cds	rna-XM_027464730.1
TBL1XR1	TBL1XR1	NC_040054.1	6850420	6854010	peak_10356	3591	-	PR_intron	rna-XM_027464782.1	TBL1XR1	NC_040054.1	6850420	6852537	peak_10821	2118	-	PR_intron	rna-XM_027464782.1
GNB4	GNB4	NC_040054.1	7452430	7452640	peak_10358	211	-	utr3	rna-XM_027464244.1	GNB4	NC_040054.1	7452430	7452670	peak_10822	241	-	utr3	rna-XM_027464244.1
DCUN1D1	DCUN1D1	NC_040054.1	8641289	8643460	peak_10360	2172	-	PR_intron	rna-XM_027464672.1	DCUN1D1	NC_040054.1	8641379	8643460	peak_10824	2082	-	PR_intron	rna-XM_027464672.1
LAMP3	LAMP3	NC_040054.1	8700242	8700393	peak_10363	152	-	cds	rna-XM_005024672.4	LAMP3	NC_040054.1	8699943	8700483	peak_10826	541	-	cds	rna-XM_005024672.4
55e87077-d39f-4b52-bcaa-a5a86914f996	55e87077-d39f-4b52-bcaa-a5a86914f996	NC_040054.1	9173338	9173542	peak_10366	205	-	NP_exon	55e87077-d39f-4b52-bcaa-a5a86914f996.trans	55e87077-d39f-4b52-bcaa-a5a86914f996	NC_040054.1	9173338	9173542	peak_10829	205	-	NP_exon	55e87077-d39f-4b52-bcaa-a5a86914f996.trans
EIF4G1	EIF4G1	NC_040054.1	9173955	9174608	peak_10368	654	-	PR_intron	rna-XM_027464231.1	EIF4G1	NC_040054.1	9174077	9174638	peak_10831	562	-	PR_intron	rna-XM_027464231.1
PSMD2	PSMD2	NC_040054.1	9194350	9194441	peak_10373	92	-	utr3	rna-XM_027464184.1	PSMD2	NC_040054.1	9196016	9196077	peak_10836	62	-	cds	rna-XM_027464184.1
LOC101790681	LOC101790681	NC_040054.1	9239529	9239589	peak_10377	61	-	cds	rna-XM_027464216.1	LOC101790681	NC_040054.1	9240334	9240574	peak_10839	241	-	cds	rna-XM_027464216.1
ABCF3	ABCF3	NC_040054.1	9248685	9249607	peak_10380	923	-	PR_intron	rna-XM_027464193.1	ABCF3	NC_040054.1	9248685	9249577	peak_10841	893	-	PR_intron	rna-XM_027464193.1
AP2M1	AP2M1	NC_040054.1	9254388	9254877	peak_10381	490	-	PR_intron	rna-XM_027464211.1	AP2M1	NC_040054.1	9252590	9252651	peak_10842	62	-	utr3	rna-XM_027464211.1
DVL3	DVL3	NC_040054.1	9283124	9283652	peak_10383	529	-	PR_intron	rna-XM_027464192.1	DVL3	NC_040054.1	9282410	9282677	peak_10845	268	-	PR_intron	rna-XM_027464192.1
EIF2B5	EIF2B5	NC_040054.1	9314814	9315024	peak_10385	211	-	utr3	rna-XM_027464194.1	EIF2B5	NC_040054.1	9314814	9315024	peak_10849	211	-	utr3	rna-XM_027464194.1
CHRND	CHRND	NC_040054.1	9554636	9554756	peak_10388	121	-	utr3	rna-XM_027464203.1	CHRND	NC_040054.1	9554636	9554696	peak_10852	61	-	utr3	rna-XM_027464203.1
PRSS56	PRSS56	NC_040054.1	9560103	9560633	peak_10391	531	-	PR_intron	rna-XM_027464200.1	PRSS56	NC_040054.1	9560328	9560852	peak_10855	525	-	PR_intron	rna-XM_027464200.1
DIS3L2	DIS3L2	NC_040054.1	9597483	9597723	peak_10392	241	-	utr3	rna-XM_027464181.1	DIS3L2	NC_040054.1	9766052	9785497	peak_10856	19446	-	PR_intron	rna-XM_027464182.1
COPS7B	COPS7B	NC_040054.1	9804130	9804341	peak_10394	212	-	utr3	rna-XM_027464220.1	COPS7B	NC_040054.1	9804160	9804371	peak_10857	212	-	utr3	rna-XM_027464220.1
PTMA	PTMA	NC_040054.1	9862844	9870575	peak_10399	7732	-	PR_intron	rna-XM_027464228.1	PTMA	NC_040054.1	9862786	9870575	peak_10861	7790	-	PR_intron	rna-XM_027464228.1
MDM1	MDM1	NC_040046.1	166123314	166124856	peak_1040	1543	+	PR_intron	rna-XM_027456049.1	MDM1	NC_040046.1	166124676	166124856	peak_1124	181	+	cds	rna-XM_027456049.1
B3GNT7	B3GNT7	NC_040054.1	9933481	9933632	peak_10400	152	-	utr3	rna-XM_005010342.4	B3GNT7	NC_040054.1	9933331	9933721	peak_10862	391	-	utr3	rna-XM_005010342.4
PSMD1	PSMD1	NC_040054.1	10026750	10032050	peak_10402	5301	-	PR_intron	rna-XM_027464001.1	PSMD1	NC_040054.1	10067488	10067609	peak_10613	122	+	PR_intron	rna-XM_027464001.1
LRCH3	LRCH3	NC_040054.1	10133405	10133616	peak_10404	212	-	utr3	rna-XM_027464756.1	LRCH3	NC_040054.1	10133405	10133616	peak_10866	212	-	utr3	rna-XM_027464756.1
FYTTD1	FYTTD1	NC_040054.1	10197865	10199219	peak_10408	1355	-	PR_intron	rna-XM_027464293.1	FYTTD1	NC_040054.1	10197835	10199219	peak_10870	1385	-	PR_intron	rna-XM_027464293.1
GRIP1	GRIP1	NC_040046.1	166828197	166828986	peak_1041	790	+	PR_intron	rna-XM_027456181.1	GRIP1	NC_040046.1	166828167	166829075	peak_1125	909	+	PR_intron	rna-XM_027456181.1
LOC101799833	LOC101799833	NC_040054.1	10242325	10242534	peak_10410	210	-	cds	rna-XM_027464150.1	LOC101799833	NC_040054.1	10242236	10242534	peak_10872	299	-	cds	rna-XM_027464150.1
TFRC	TFRC	NC_040054.1	10303784	10305003	peak_10411	1220	-	PR_intron	rna-XM_027464142.1	TFRC	NC_040054.1	10303754	10305033	peak_10873	1280	-	PR_intron	rna-XM_027464142.1
PCYT1A	PCYT1A	NC_040054.1	10324845	10324996	peak_10413	152	-	utr3	rna-XM_013106194.3	PCYT1A	NC_040054.1	10324816	10325026	peak_10875	211	-	utr3	rna-XM_013106194.3
MASP1	MASP1	NC_040054.1	10371227	10371317	peak_10415	91	-	PR_intron	rna-XM_027464145.1	MASP1	NC_040054.1	10371077	10371556	peak_10877	480	-	PR_intron	rna-XM_027464145.1
BCL6	BCL6	NC_040054.1	10465180	10465420	peak_10417	241	-	utr3	rna-XM_027464092.1	BCL6	NC_040054.1	10465180	10465390	peak_10879	211	-	utr3	rna-XM_027464092.1
FGF12	FGF12	NC_040054.1	11840301	11848589	peak_10419	8289	-	PR_intron	rna-XM_027463968.1	FGF12	NC_040054.1	11840271	11848619	peak_10881	8349	-	PR_intron	rna-XM_027463968.1
LLPH	LLPH	NC_040046.1	166904492	166908469	peak_1042	3978	+	PR_intron	rna-XM_027456217.1	LLPH	NC_040046.1	166904492	166908499	peak_1127	4008	+	PR_intron	rna-XM_027456217.1
MB21D2	MB21D2	NC_040054.1	12070557	12070888	peak_10421	332	-	utr3	rna-XM_013108576.3	MB21D2	NC_040054.1	12070557	12071067	peak_10884	511	-	utr3	rna-XM_013108576.3
LOC113844492	LOC113844492	NC_040054.1	12515251	12515401	peak_10424	151	-	cds	rna-XM_027464561.1	LOC113844492	NC_040054.1	12516889	12517010	peak_10888	122	-	cds	rna-XM_027464561.1
LOC101802925	LOC101802925	NC_040054.1	12526158	12526607	peak_10426	450	-	cds	rna-XM_027464784.1	LOC101802925	NC_040054.1	12526188	12526577	peak_10889	390	-	cds	rna-XM_027464784.1
LSG1	LSG1	NC_040054.1	12621777	12623480	peak_10427	1704	-	PR_intron	rna-XM_027464413.1	LSG1	NC_040054.1	12621777	12623450	peak_10890	1674	-	PR_intron	rna-XM_027464413.1
ACAP2	ACAP2	NC_040054.1	12729883	12730315	peak_10428	433	-	PR_intron	rna-XM_027464565.1	ACAP2	NC_040054.1	12728766	12730345	peak_10891	1580	-	PR_intron	rna-XM_027464565.1
C1H12orf66	C1H12orf66	NC_040046.1	167723154	167723334	peak_1043	181	+	cds	rna-XM_027456404.1	C1H12orf66	NC_040046.1	167723154	167723334	peak_1128	181	+	cds	rna-XM_027456404.1
PPP1R2	PPP1R2	NC_040054.1	12790217	12792420	peak_10430	2204	-	PR_intron	rna-XM_027464778.1	PPP1R2	NC_040054.1	12790217	12792450	peak_10893	2234	-	PR_intron	rna-XM_027464778.1
YEATS2	YEATS2	NC_040054.1	13856543	13859379	peak_10433	2837	-	PR_intron	rna-XM_027464299.1	YEATS2	NC_040054.1	13853974	13854064	peak_10895	91	-	cds	rna-XM_027464299.1
KLHL24	KLHL24	NC_040054.1	13901273	13901334	peak_10436	62	-	utr3	rna-XM_027464304.1	KLHL24	NC_040054.1	13914895	13915226	peak_10899	332	-	cds	rna-XM_027464304.1
FAM168B	FAM168B	NC_040054.1	14242088	14242328	peak_10439	241	-	utr3	rna-XM_027464496.1	FAM168B	NC_040054.1	14242088	14242328	peak_10901	241	-	utr3	rna-XM_027464496.1
TSPEAR	TSPEAR	NC_040054.1	14353102	14353222	peak_10440	121	-	utr3	rna-XM_027464404.1	TSPEAR	NC_040054.1	14353042	14353252	peak_10902	211	-	utr3	rna-XM_027464404.1
UBE2G2	UBE2G2	NC_040054.1	14381878	14386612	peak_10442	4735	-	PR_intron	rna-XM_027464094.1	UBE2G2	NC_040054.1	14371404	14373320	peak_10903	1917	-	PR_intron	rna-XM_013094603.3
PTTG1IP	PTTG1IP	NC_040054.1	14390260	14390319	peak_10443	60	-	utr3	rna-XM_027464093.1	PTTG1IP	NC_040054.1	14391327	14393553	peak_10905	2227	-	PR_intron	rna-XM_027464093.1
BOK	BOK	NC_040054.1	14457763	14457971	peak_10445	209	-	utr3	rna-XM_013108018.3	BOK	NC_040054.1	14457763	14458001	peak_10906	239	-	utr3	rna-XM_013108018.3
FARP2	FARP2	NC_040054.1	14507950	14508100	peak_10446	151	-	utr3	rna-XM_027464122.1	FARP2	NC_040054.1	14507291	14507442	peak_10907	152	-	utr3	rna-XM_027464122.1
SEPT2	SEPT2	NC_040054.1	14593076	14597798	peak_10448	4723	-	PR_intron	rna-XM_027464130.1	SEPT2	NC_040054.1	14593076	14597828	peak_10909	4753	-	PR_intron	rna-XM_027464130.1
PPP1R7	PPP1R7	NC_040054.1	14663022	14665728	peak_10450	2707	-	PR_intron	rna-XM_027464822.1	PPP1R7	NC_040054.1	14663052	14665728	peak_10910	2677	-	PR_intron	rna-XM_027464822.1
THAP4	THAP4	NC_040054.1	14812478	14812837	peak_10454	360	-	cds	rna-XM_027464850.1	THAP4	NC_040054.1	14811821	14812807	peak_10912	987	-	cds	rna-XM_027464850.1
UBXN7	UBXN7	NC_040054.1	14899540	14899631	peak_10455	92	-	cds	rna-XM_027464082.1	UBXN7	NC_040054.1	14904417	14905545	peak_10914	1129	-	PR_intron	rna-XM_027464082.1
RNF168	RNF168	NC_040054.1	14928678	14928829	peak_10458	152	-	cds	rna-XM_021277869.2	RNF168	NC_040054.1	14927720	14927781	peak_10915	62	-	utr3	rna-XM_021277869.2
WDR53	WDR53	NC_040054.1	14945429	14945729	peak_10462	301	-	cds	rna-XM_027463875.1	WDR53	NC_040054.1	14945429	14945789	peak_10919	361	-	cds	rna-XM_027463875.1
CEP19	CEP19	NC_040054.1	14973086	14973353	peak_10465	268	-	cds	rna-XM_021277864.2	CEP19	NC_040054.1	14972938	14973353	peak_10921	416	-	cds	rna-XM_021277864.2
RYK	RYK	NC_040054.1	15155343	15155582	peak_10466	240	-	utr3	rna-XM_027464169.1	RYK	NC_040054.1	15155343	15155582	peak_10922	240	-	utr3	rna-XM_027464169.1
AMOTL2	AMOTL2	NC_040054.1	15227500	15227561	peak_10468	62	-	cds	rna-XM_027464396.1	AMOTL2	NC_040054.1	15227500	15227688	peak_10924	189	-	PR_intron	rna-XM_027464396.1
LRIG3	LRIG3	NC_040046.1	169758778	169758928	peak_1047	151	+	utr5	rna-XM_027456645.1	LRIG3	NC_040046.1	169796492	169796672	peak_1133	181	+	cds	rna-XM_027456645.1
IGF2BP2	IGF2BP2	NC_040054.1	15267675	15268035	peak_10471	361	-	utr3	rna-XM_021277867.2	IGF2BP2	NC_040054.1	15267675	15268035	peak_10927	361	-	utr3	rna-XM_021277867.2
TRA2B	TRA2B	NC_040054.1	15295490	15301331	peak_10475	5842	-	PR_intron	rna-XM_027464593.1	TRA2B	NC_040054.1	15295519	15301331	peak_10931	5813	-	PR_intron	rna-XM_027464593.1
PFKL	PFKL	NC_040054.1	15332036	15332247	peak_10477	212	-	cds	rna-XM_027464589.1	PFKL	NC_040054.1	15332036	15332247	peak_10933	212	-	cds	rna-XM_027464589.1
DNAJB11	DNAJB11	NC_040054.1	15339426	15343821	peak_10478	4396	-	PR_intron	rna-XM_027464597.1	DNAJB11	NC_040054.1	15339545	15343791	peak_10934	4247	-	PR_intron	rna-XM_027464597.1
DZIP1L	DZIP1L	NC_040054.1	15607232	15608943	peak_10481	1712	-	PR_intron	rna-XM_027463979.1	DZIP1L	NC_040054.1	15607291	15608943	peak_10937	1653	-	PR_intron	rna-XM_027463979.1
LOC101794246	LOC101794246	NC_040054.1	15881713	15881804	peak_10482	92	-	NP_exon	rna-XR_003499032.1	LOC101794246	NC_040054.1	15882763	15882944	peak_10938	182	-	NP_exon	rna-XR_003499032.1
LOC101793891	LOC101793891	NC_040054.1	16000323	16001010	peak_10484	688	-	utr3	rna-XM_027464074.1	LOC101793891	NC_040054.1	16000323	16000862	peak_10939	540	-	utr3	rna-XM_027464074.1
CEP63	CEP63	NC_040054.1	16075387	16077867	peak_10487	2481	-	PR_intron	rna-XM_005019381.4	CEP63	NC_040054.1	16075417	16077897	peak_10941	2481	-	PR_intron	rna-XM_005019381.4
MAP3K13	MAP3K13	NC_040054.1	16118530	16118740	peak_10490	211	-	utr3	rna-XM_027463911.1	MAP3K13	NC_040054.1	16117933	16118113	peak_10946	181	-	utr3	rna-XM_027463911.1
ARMC8	ARMC8	NC_040054.1	16333860	16334041	peak_10492	182	-	utr3	rna-XM_027464022.1	ARMC8	NC_040054.1	16332726	16332906	peak_10951	181	-	utr3	rna-XM_027464022.1
DBR1	DBR1	NC_040054.1	16396063	16396214	peak_10494	152	-	utr3	rna-XM_027464023.1	DBR1	NC_040054.1	16396362	16396572	peak_10954	211	-	utr3	rna-XM_027464023.1
MSL2	MSL2	NC_040054.1	16460646	16460856	peak_10499	211	-	cds	rna-XM_027464025.1	MSL2	NC_040054.1	16460706	16460826	peak_10957	121	-	cds	rna-XM_027464025.1
a4e640b5-bef9-4f31-95b5-04c2afafb611	a4e640b5-bef9-4f31-95b5-04c2afafb611	NC_040046.1	9747489	9747999	peak_105	511	+	NP_exon	a4e640b5-bef9-4f31-95b5-04c2afafb611.trans	a4e640b5-bef9-4f31-95b5-04c2afafb611	NC_040046.1	9747309	9747999	peak_107	691	+	NP_exon	a4e640b5-bef9-4f31-95b5-04c2afafb611.trans
RPAP3	RPAP3	NC_040046.1	170098419	170101711	peak_1050	3293	+	PR_intron	rna-XM_027456650.1	RPAP3	NC_040046.1	170098419	170100675	peak_1135	2257	+	PR_intron	rna-XM_027456650.1
STAG1	STAG1	NC_040054.1	16520680	16528281	peak_10501	7602	-	PR_intron	rna-XM_027464645.1	STAG1	NC_040054.1	16520680	16524965	peak_10960	4286	-	PR_intron	rna-XM_027464645.1
NGEF	NGEF	NC_040054.1	16887423	16887514	peak_10505	92	-	utr3	rna-XM_027464471.1	NGEF	NC_040054.1	16912537	16915147	peak_10702	2611	+	PR_intron	rna-XM_027464471.1
IWS1	IWS1	NC_040054.1	17149036	17149276	peak_10507	241	-	utr3	rna-XM_027464474.1	IWS1	NC_040054.1	17149006	17149276	peak_10965	271	-	utr3	rna-XM_027464474.1
AMMECR1L	AMMECR1L	NC_040054.1	17337070	17337519	peak_10517	450	-	utr3	rna-XM_027463894.1	AMMECR1L	NC_040054.1	17337040	17337489	peak_10978	450	-	utr3	rna-XM_027463894.1
SAP130	SAP130	NC_040054.1	17350446	17350970	peak_10519	525	-	PR_intron	rna-XM_027463889.1	SAP130	NC_040054.1	17350296	17350970	peak_10981	675	-	utr3	rna-XM_027463889.1
2058d621-ab91-45be-b7be-de67b56ec3f8	2058d621-ab91-45be-b7be-de67b56ec3f8	NC_040054.1	17445582	17445793	peak_10520	212	-	NP_exon	2058d621-ab91-45be-b7be-de67b56ec3f8.trans	2058d621-ab91-45be-b7be-de67b56ec3f8	NC_040054.1	17445342	17445733	peak_10982	392	-	NP_exon	2058d621-ab91-45be-b7be-de67b56ec3f8.trans
CAB39	CAB39	NC_040054.1	18382499	18384535	peak_10526	2037	-	PR_intron	rna-XM_027463971.1	CAB39	NC_040054.1	18382499	18384565	peak_10989	2067	-	PR_intron	rna-XM_027463971.1
LOC106019821	LOC106019821	NC_040054.1	18426417	18426478	peak_10527	62	-	cds	rna-XM_027464573.1	LOC106019821	NC_040054.1	18426687	18426778	peak_10990	92	-	cds	rna-XM_027464573.1
PER2	PER2	NC_040054.1	18491617	18492008	peak_10529	392	-	cds	rna-XM_027463950.1	PER2	NC_040054.1	18486005	18487146	peak_10991	1142	-	PR_intron	rna-XM_027463950.1
SLC38A2	SLC38A2	NC_040046.1	170460212	170460333	peak_1053	122	+	cds	rna-XM_027456747.1	SLC38A2	NC_040046.1	170471685	170471985	peak_1137	301	+	utr3	rna-XM_027456747.1
PIK3CB	PIK3CB	NC_040054.1	18603727	18604574	peak_10530	848	-	PR_intron	rna-XM_027463982.1	PIK3CB	NC_040054.1	18603578	18604574	peak_10994	997	-	PR_intron	rna-XM_027463982.1
COPB2	COPB2	NC_040054.1	18901157	18901396	peak_10531	240	-	utr3	rna-XM_027464164.1	COPB2	NC_040054.1	18901157	18901396	peak_10995	240	-	utr3	rna-XM_027464164.1
NMNAT3	NMNAT3	NC_040054.1	18980986	18981076	peak_10532	91	-	cds	rna-XM_013107825.3	NMNAT3	NC_040054.1	18981045	18981225	peak_10998	181	-	cds	rna-XM_013107825.3
SPSB4	SPSB4	NC_040054.1	19752116	19765247	peak_10534	13132	-	PR_intron	rna-XM_027464342.1	SPSB4	NC_040054.1	19715105	19715165	peak_10999	61	-	PR_intron	rna-XM_027464347.1
SLC25A36	SLC25A36	NC_040054.1	19907138	19907229	peak_10535	92	-	utr3	rna-XM_027464053.1	SLC25A36	NC_040054.1	19907556	19909093	peak_11002	1538	-	PR_intron	rna-XM_027464053.1
EPHA4	EPHA4	NC_040054.1	20871978	20872128	peak_10537	151	-	utr3	rna-XM_027464075.1	EPHA4	NC_040054.1	20871978	20872128	peak_11003	151	-	utr3	rna-XM_027464075.1
SCG2	SCG2	NC_040054.1	21539961	21540199	peak_10543	239	-	cds	rna-XM_027464445.1	SCG2	NC_040054.1	21540109	21540259	peak_11008	151	-	cds	rna-XM_027464445.1
CUL3	CUL3	NC_040054.1	21733398	21734360	peak_10546	963	-	PR_intron	rna-XM_013105923.3	CUL3	NC_040054.1	21733338	21734330	peak_11011	993	-	PR_intron	rna-XM_013105923.3
DOCK10	DOCK10	NC_040054.1	21967673	21984878	peak_10547	17206	-	PR_intron	rna-XM_027464808.1	DOCK10	NC_040054.1	21984937	21985118	peak_11012	182	-	PR_intron	rna-XM_027464808.1
IRS1	IRS1	NC_040054.1	22607604	22635791	peak_10548	28188	-	NP_intron	rna-XR_003499038.1	IRS1	NC_040054.1	22607634	22635761	peak_11013	28128	-	NP_intron	rna-XR_003499038.1
SLC38A1	SLC38A1	NC_040046.1	170526808	170526958	peak_1055	151	+	utr3	rna-XM_027456755.1	SLC38A1	NC_040046.1	170526808	170526898	peak_1138	91	+	utr3	rna-XM_027456755.1
PID1	PID1	NC_040054.1	23321780	23322018	peak_10550	239	-	cds	rna-XM_027464166.1	PID1	NC_040054.1	23321750	23322196	peak_11021	447	-	cds	rna-XM_027464166.1
f7d4f5c3-bb75-48d1-adff-9fe527debf34	f7d4f5c3-bb75-48d1-adff-9fe527debf34	NC_040054.1	23560557	23560885	peak_10551	329	-	NP_exon	f7d4f5c3-bb75-48d1-adff-9fe527debf34.trans	f7d4f5c3-bb75-48d1-adff-9fe527debf34	NC_040054.1	23560587	23560885	peak_11022	299	-	NP_exon	f7d4f5c3-bb75-48d1-adff-9fe527debf34.trans
TRIP12	TRIP12	NC_040054.1	23573455	23574672	peak_10553	1218	-	PR_intron	rna-XM_027464829.1	TRIP12	NC_040054.1	23573426	23574672	peak_11024	1247	-	PR_intron	rna-XM_027464829.1
SLC16A14	SLC16A14	NC_040054.1	23672896	23673226	peak_10557	331	-	cds	rna-XM_027464439.1	SLC16A14	NC_040054.1	23672956	23677823	peak_11028	4868	-	PR_intron	rna-XM_027464439.1
TFDP2	TFDP2	NC_040054.1	23906700	23906881	peak_10559	182	-	utr3	rna-XM_027463927.1	TFDP2	NC_040054.1	23906760	23906881	peak_11029	122	-	utr3	rna-XM_027463927.1
SCAF11	SCAF11	NC_040046.1	170590449	170590989	peak_1056	541	+	cds	rna-XM_027456758.1	SCAF11	NC_040046.1	170577545	170580450	peak_1139	2906	+	PR_intron	rna-XM_027456758.1
ATR	ATR	NC_040054.1	24058187	24059383	peak_10567	1197	-	PR_intron	rna-XM_027464294.1	ATR	NC_040054.1	24058127	24058188	peak_11035	62	-	cds	rna-XM_027464294.1
SLC9A9	SLC9A9	NC_040054.1	24321726	24321966	peak_10569	241	-	cds	rna-XM_027464695.1	SLC9A9	NC_040054.1	24321666	24322615	peak_11039	950	-	PR_intron	rna-XM_027464695.1
SLU7	SLU7	NC_040055.1	6489	11875	peak_10570	5387	+	PR_intron	rna-XM_027465116.1	SLU7	NC_040055.1	6519	11845	peak_11041	5327	+	PR_intron	rna-XM_027465116.1
C1QTNF2	C1QTNF2	NC_040055.1	30574	32515	peak_10572	1942	+	PR_intron	rna-XM_005009300.4	C1QTNF2	NC_040055.1	30604	32575	peak_11043	1972	+	PR_intron	rna-XM_005009300.4
PWWP2A	PWWP2A	NC_040055.1	137097	137218	peak_10573	122	+	cds	rna-XM_027465306.1	PWWP2A	NC_040055.1	124660	124781	peak_11045	122	+	NP_exon	rna-XR_003499580.1
FBXO38	FBXO38	NC_040055.1	446928	451339	peak_10576	4412	+	PR_intron	rna-XM_005009317.4	FBXO38	NC_040055.1	446958	451339	peak_11049	4382	+	PR_intron	rna-XM_005009317.4
CSNK1A1	CSNK1A1	NC_040055.1	786711	791914	peak_10577	5204	+	PR_intron	rna-XM_027464915.1	CSNK1A1	NC_040055.1	786711	791914	peak_11050	5204	+	PR_intron	rna-XM_027464915.1
IL17B	IL17B	NC_040055.1	827017	827108	peak_10578	92	+	cds	rna-XM_005009332.4	IL17B	NC_040055.1	827714	827804	peak_11051	91	+	cds	rna-XM_005009332.4
HMMR	HMMR	NC_040055.1	939233	939886	peak_10579	654	+	PR_intron	rna-XM_027465205.1	HMMR	NC_040055.1	939233	943345	peak_11052	4113	+	PR_intron	rna-XM_027465205.1
TENM1	TENM1	NC_040055.1	2483738	2484098	peak_10583	361	+	cds	rna-XM_027465532.1	TENM1	NC_040055.1	2350179	2355512	peak_11056	5334	+	PR_intron	rna-XM_027465532.1
THOC2	THOC2	NC_040055.1	2721693	2722863	peak_10590	1171	+	cds	rna-XM_027465360.1	THOC2	NC_040055.1	2721604	2722833	peak_11064	1230	+	cds	rna-XM_027465360.1
CUL4B	CUL4B	NC_040055.1	3428922	3429581	peak_10592	660	+	utr5	rna-XM_021274229.2	CUL4B	NC_040055.1	3428922	3429581	peak_11066	660	+	utr5	rna-XM_021274229.2
LAMP2	LAMP2	NC_040055.1	3476703	3476794	peak_10594	92	+	PR_intron	rna-XM_027464978.1	LAMP2	NC_040055.1	3476733	3476824	peak_11069	92	+	PR_intron	rna-XM_027464978.1
TMEM255A	TMEM255A	NC_040055.1	3513520	3517341	peak_10595	3822	+	PR_intron	rna-XM_013102048.3	TMEM255A	NC_040055.1	3513490	3517311	peak_11070	3822	+	PR_intron	rna-XM_013102048.3
LOC101799484	LOC101799484	NC_040055.1	3548554	3548645	peak_10597	92	+	cds	rna-XM_027465184.1	LOC101799484	NC_040055.1	3548524	3548705	peak_11072	182	+	cds	rna-XM_027465184.1
MTMR8	MTMR8	NC_040055.1	3708595	3710323	peak_10601	1729	+	PR_intron	rna-XM_027465040.1	MTMR8	NC_040055.1	3708595	3710293	peak_11077	1699	+	PR_intron	rna-XM_027465040.1
AMER1	AMER1	NC_040055.1	3750635	3750905	peak_10604	271	+	cds	rna-XM_027465511.1	AMER1	NC_040055.1	3750724	3750845	peak_11079	122	+	cds	rna-XM_027465511.1
TWF1	TWF1	NC_040046.1	171389445	171389656	peak_1061	212	+	cds	rna-XM_013100644.3	TWF1	NC_040046.1	171389445	171389626	peak_1144	182	+	cds	rna-XM_013100644.3
ARHGEF9	ARHGEF9	NC_040055.1	3776770	3779031	peak_10610	2262	+	PR_intron	rna-XM_021274526.2	ARHGEF9	NC_040055.1	3778790	3779181	peak_11084	392	+	cds	rna-XM_021274526.2
LOC101797327	LOC101797327	NC_040055.1	4065775	4074475	peak_10614	8701	+	PR_intron	rna-XM_027465514.1	LOC101797327	NC_040055.1	4065746	4074475	peak_11088	8730	+	PR_intron	rna-XM_027465514.1
LOC101795560	LOC101795560	NC_040055.1	4252031	4265652	peak_10619	13622	+	PR_intron	rna-XM_027465519.1	LOC101795560	NC_040055.1	4252001	4265652	peak_11092	13652	+	PR_intron	rna-XM_027465519.1
ADAMTS20	ADAMTS20	NC_040046.1	171473211	171473481	peak_1062	271	+	utr5	rna-XM_027456973.1	ADAMTS20	NC_040046.1	171473181	171473481	peak_1145	301	+	utr5	rna-XM_027456973.1
LOC101794906	LOC101794906	NC_040055.1	4377650	4377740	peak_10621	91	+	cds	rna-XM_013107951.3	LOC101794906	NC_040055.1	4377680	4377830	peak_11094	151	+	cds	rna-XM_013107951.3
SLC16A2	SLC16A2	NC_040055.1	4423818	4424619	peak_10622	802	+	PR_intron	rna-XM_027465361.1	SLC16A2	NC_040055.1	4423818	4424619	peak_11095	802	+	PR_intron	rna-XM_027465361.1
UPRT	UPRT	NC_040055.1	4682466	4692288	peak_10624	9823	+	PR_intron	rna-XM_027464973.1	UPRT	NC_040055.1	4682466	4687949	peak_11097	5484	+	PR_intron	rna-XM_027464973.1
FGF16	FGF16	NC_040055.1	4934858	4938803	peak_10625	3946	+	PR_intron	rna-XM_027464974.1	FGF16	NC_040055.1	4934858	4939520	peak_11098	4663	+	PR_intron	rna-XM_027464974.1
ATP7A	ATP7A	NC_040055.1	5057826	5058142	peak_10627	317	+	PR_intron	rna-XM_027465056.1	ATP7A	NC_040055.1	5057856	5058142	peak_11101	287	+	PR_intron	rna-XM_027465056.1
AMOT	AMOT	NC_040055.1	5109552	5120414	peak_10629	10863	+	PR_intron	rna-XM_027465450.1	AMOT	NC_040055.1	5109462	5120414	peak_11104	10953	+	PR_intron	rna-XM_027465450.1
DCX	DCX	NC_040055.1	5470494	5470704	peak_10633	211	+	utr3	rna-XM_013095502.3	DCX	NC_040055.1	5381478	5391833	peak_11108	10356	+	PR_intron	rna-XM_013095502.3
ACSL4	ACSL4	NC_040055.1	5963773	5975165	peak_10637	11393	+	PR_intron	rna-XM_013095524.3	ACSL4	NC_040055.1	5996202	5996609	peak_11111	408	+	PR_intron	rna-XM_027465391.1
IRS4	IRS4	NC_040055.1	6093318	6093529	peak_10639	212	+	cds	rna-XM_005015239.3	IRS4	NC_040055.1	6093288	6093558	peak_11112	271	+	cds	rna-XM_005015239.3
COL4A6	COL4A6	NC_040055.1	6308778	6312103	peak_10642	3326	+	PR_intron	rna-XM_027465434.1	COL4A6	NC_040055.1	6308749	6311345	peak_11116	2597	+	PR_intron	rna-XM_027465434.1
LOC101805207	LOC101805207	NC_040055.1	6341568	6342908	peak_10645	1341	+	PR_intron	rna-XM_027465365.1	LOC101805207	NC_040055.1	6341598	6342849	peak_11118	1252	+	PR_intron	rna-XM_027465365.1
MID2	MID2	NC_040055.1	6479345	6479615	peak_10648	271	+	cds	rna-XM_027465026.1	MID2	NC_040055.1	6479375	6479585	peak_11121	211	+	cds	rna-XM_027465026.1
LOC101803704	LOC101803704	NC_040055.1	6605055	6605265	peak_10650	211	+	cds	rna-XM_027465229.1	LOC101803704	NC_040055.1	6604936	6605235	peak_11122	300	+	cds	rna-XM_027465229.1
91075aa8-eb7a-4ccc-953d-7ce6d5205358	91075aa8-eb7a-4ccc-953d-7ce6d5205358	NC_040055.1	6607391	6607482	peak_10652	92	+	NP_exon	91075aa8-eb7a-4ccc-953d-7ce6d5205358.trans	91075aa8-eb7a-4ccc-953d-7ce6d5205358	NC_040055.1	6608317	6608437	peak_11124	121	+	NP_exon	91075aa8-eb7a-4ccc-953d-7ce6d5205358.trans
SASH3	SASH3	NC_040055.1	6664043	6664133	peak_10655	91	+	utr3	rna-XM_027464901.1	SASH3	NC_040055.1	6664132	6664222	peak_11129	91	+	utr3	rna-XM_027464901.1
UTP14A	UTP14A	NC_040055.1	6686344	6687679	peak_10656	1336	+	cds	rna-XM_027464897.1	UTP14A	NC_040055.1	6686374	6686807	peak_11130	434	+	PR_intron	rna-XM_027464897.1
BCORL1	BCORL1	NC_040055.1	6703386	6703916	peak_10658	531	+	PR_intron	rna-XM_027465115.1	BCORL1	NC_040055.1	6703386	6704036	peak_11133	651	+	cds	rna-XM_027465115.1
PRICKLE1	PRICKLE1	NC_040046.1	171852258	171854203	peak_1066	1946	+	PR_intron	rna-XM_027457011.1	PRICKLE1	NC_040046.1	171851929	171852050	peak_1147	122	+	cds	rna-XM_027457011.1
1322e7b9-d42c-49c1-a5b9-54449978b2b2	1322e7b9-d42c-49c1-a5b9-54449978b2b2	NC_040055.1	6717675	6717915	peak_10661	241	+	NP_exon	1322e7b9-d42c-49c1-a5b9-54449978b2b2.trans	1322e7b9-d42c-49c1-a5b9-54449978b2b2	NC_040055.1	6717705	6717945	peak_11136	241	+	NP_exon	1322e7b9-d42c-49c1-a5b9-54449978b2b2.trans
LOC101800948	LOC101800948	NC_040055.1	6737005	6737485	peak_10663	481	+	utr3	rna-XM_027465370.1	LOC101800948	NC_040055.1	6736616	6736707	peak_11138	92	+	cds	rna-XM_027465370.1
NKAP	NKAP	NC_040055.1	6935148	6939006	peak_10665	3859	+	PR_intron	rna-XM_027465444.1	NKAP	NC_040055.1	6935148	6937475	peak_11141	2328	+	PR_intron	rna-XM_027465444.1
UPF3B	UPF3B	NC_040055.1	6944789	6944997	peak_10666	209	+	cds	rna-XM_027465443.1	UPF3B	NC_040055.1	6944789	6945027	peak_11144	239	+	cds	rna-XM_027465443.1
SEPT6	SEPT6	NC_040055.1	6979072	6979850	peak_10668	779	+	PR_intron	rna-XM_027465257.1	SEPT6	NC_040055.1	6979042	6981820	peak_11146	2779	+	PR_intron	rna-XM_027465257.1
37b7b5c3-9246-4418-90d3-2ef5be6d7542	37b7b5c3-9246-4418-90d3-2ef5be6d7542	NC_040046.1	171854262	171854922	peak_1067	661	+	NP_exon	37b7b5c3-9246-4418-90d3-2ef5be6d7542.trans	37b7b5c3-9246-4418-90d3-2ef5be6d7542	NC_040046.1	171853980	171854933	peak_1149	954	+	NP_exon	37b7b5c3-9246-4418-90d3-2ef5be6d7542.trans
NKRF	NKRF	NC_040055.1	6992859	6992950	peak_10670	92	+	cds	rna-XM_027465251.1	NKRF	NC_040055.1	6992829	6993247	peak_11148	419	+	cds	rna-XM_027465251.1
C10HXorf56	C10HXorf56	NC_040055.1	7007456	7008611	peak_10672	1156	+	PR_intron	rna-XM_027465260.1	C10HXorf56	NC_040055.1	7006905	7008640	peak_11150	1736	+	PR_intron	rna-XM_027465260.1
LOC101799930	LOC101799930	NC_040055.1	7046891	7048750	peak_10673	1860	+	PR_intron	rna-XM_027465252.1	LOC101799930	NC_040055.1	7046861	7050197	peak_11151	3337	+	PR_intron	rna-XM_027465252.1
KIAA1210	KIAA1210	NC_040055.1	7087982	7088073	peak_10676	92	+	PR_intron	rna-XM_027465269.1	KIAA1210	NC_040055.1	7113442	7113683	peak_11155	242	+	cds	rna-XM_027465269.1
FAM199X	FAM199X	NC_040055.1	7190543	7190754	peak_10678	212	+	cds	rna-XM_027465275.1	FAM199X	NC_040055.1	7190513	7190784	peak_11157	272	+	cds	rna-XM_027465275.1
IL1RAPL2	IL1RAPL2	NC_040055.1	7479714	7485490	peak_10679	5777	+	PR_intron	rna-XM_027464997.1	IL1RAPL2	NC_040055.1	7630655	7631164	peak_11158	510	+	cds	rna-XM_027464997.1
NRK	NRK	NC_040055.1	7693686	7698165	peak_10682	4480	+	PR_intron	rna-XM_027465375.1	NRK	NC_040055.1	7693686	7698165	peak_11159	4480	+	PR_intron	rna-XM_027465375.1
RNF128	RNF128	NC_040055.1	7814763	7814914	peak_10684	152	+	utr3	rna-XM_005020473.4	RNF128	NC_040055.1	7814733	7814944	peak_11161	212	+	utr3	rna-XM_005020473.4
SLITRK2	SLITRK2	NC_040055.1	9290053	9290233	peak_10689	181	+	cds	rna-XM_027464940.1	SLITRK2	NC_040055.1	9288499	9288709	peak_11162	211	+	cds	rna-XM_027464940.1
SLITRK4	SLITRK4	NC_040055.1	10036756	10036817	peak_10691	62	+	cds	rna-XM_027465198.1	SLITRK4	NC_040055.1	10036277	10036518	peak_11164	242	+	cds	rna-XM_027465198.1
GABRA3	GABRA3	NC_040055.1	10972962	10973023	peak_10694	62	+	cds	rna-XM_027465377.1	GABRA3	NC_040055.1	10972902	10973053	peak_11171	152	+	cds	rna-XM_027465377.1
PRPS1	PRPS1	NC_040055.1	11237381	11237590	peak_10695	210	+	utr5	rna-XM_027465168.1	PRPS1	NC_040055.1	11246861	11247189	peak_11174	329	+	utr3	rna-XM_027465168.1
TMSB15B	TMSB15B	NC_040055.1	11252371	11253534	peak_10697	1164	+	PR_intron	rna-XM_027465291.1	TMSB15B	NC_040055.1	11252343	11253534	peak_11175	1192	+	PR_intron	rna-XM_027465291.1
RAB9B	RAB9B	NC_040055.1	11258373	11258853	peak_10698	481	+	utr3	rna-XM_013107144.3	RAB9B	NC_040055.1	11257863	11258074	peak_11176	212	+	cds	rna-XM_013107144.3
BTK	BTK	NC_040055.1	11304549	11304729	peak_10699	181	+	utr3	rna-XM_027464927.1	BTK	NC_040055.1	11304549	11304699	peak_11178	151	+	utr3	rna-XM_027464927.1
CEP295	CEP295	NC_040046.1	10251967	10256499	peak_107	4533	+	PR_intron	rna-XM_027465054.1	CEP295	NC_040046.1	10251937	10256439	peak_110	4503	+	PR_intron	rna-XM_027465054.1
ZCRB1	ZCRB1	NC_040046.1	171937831	171939998	peak_1070	2168	+	PR_intron	rna-XM_027457090.1	ZCRB1	NC_040046.1	171937831	171939998	peak_1150	2168	+	PR_intron	rna-XM_027457090.1
TAF7L	TAF7L	NC_040055.1	11314281	11315597	peak_10700	1317	+	PR_intron	rna-XM_027464933.1	TAF7L	NC_040055.1	11314252	11315597	peak_11179	1346	+	PR_intron	rna-XM_027464933.1
LOC113844695	LOC113844695	NC_040055.1	11390107	11390313	peak_10701	207	+	cds	rna-XM_027464896.1	LOC113844695	NC_040055.1	11390107	11390255	peak_11180	149	+	cds	rna-XM_027464896.1
DKC1	DKC1	NC_040055.1	11396951	11400354	peak_10702	3404	+	PR_intron	rna-XM_027464888.1	DKC1	NC_040055.1	11396921	11400354	peak_11181	3434	+	PR_intron	rna-XM_027464888.1
ZMYM3	ZMYM3	NC_040055.1	11575494	11577122	peak_10703	1629	+	cds	rna-XM_027465483.1	ZMYM3	NC_040055.1	11575464	11577848	peak_11182	2385	+	cds	rna-XM_027465483.1
LOC101794001	LOC101794001	NC_040055.1	11634498	11634918	peak_10705	421	+	utr3	rna-XM_027465147.1	LOC101794001	NC_040055.1	11632626	11632775	peak_11183	150	+	PR_intron	rna-XM_027465147.1
SNX12	SNX12	NC_040055.1	11664780	11664990	peak_10706	211	+	utr3	rna-XM_027465154.1	SNX12	NC_040055.1	11664750	11664870	peak_11185	121	+	utr3	rna-XM_027465154.1
SLC7A3	SLC7A3	NC_040055.1	11675022	11676573	peak_10707	1552	+	PR_intron	rna-XM_027465141.1	SLC7A3	NC_040055.1	11675022	11676633	peak_11186	1612	+	PR_intron	rna-XM_027465141.1
LOC101791836	LOC101791836	NC_040055.1	12266407	12269537	peak_10708	3131	+	PR_intron	rna-XM_027465172.1	LOC101791836	NC_040055.1	12266407	12269537	peak_11188	3131	+	PR_intron	rna-XM_027465172.1
YAF2	YAF2	NC_040046.1	171997334	172000165	peak_1071	2832	+	PR_intron	rna-XM_027457095.1	YAF2	NC_040046.1	171997304	172000165	peak_1151	2862	+	PR_intron	rna-XM_027457095.1
AGTR2	AGTR2	NC_040055.1	12419672	12419733	peak_10711	62	+	cds	rna-XM_005031177.4	AGTR2	NC_040055.1	12419402	12419613	peak_11190	212	+	cds	rna-XM_005031177.4
DOCK11	DOCK11	NC_040055.1	12765826	12767069	peak_10714	1244	+	PR_intron	rna-XM_027464869.1	DOCK11	NC_040055.1	12765796	12767069	peak_11193	1274	+	PR_intron	rna-XM_027464869.1
IL13RA1	IL13RA1	NC_040055.1	12848890	12849011	peak_10716	122	+	utr3	rna-XM_027464870.1	IL13RA1	NC_040055.1	12849369	12849580	peak_11194	212	+	utr3	rna-XM_027464870.1
STK26	STK26	NC_040055.1	12901381	12901531	peak_10718	151	+	utr3	rna-XM_027465043.1	STK26	NC_040055.1	12901291	12901472	peak_11196	182	+	utr3	rna-XM_027465043.1
PHF6	PHF6	NC_040055.1	13591054	13601188	peak_10719	10135	+	PR_intron	rna-XM_027465331.1	PHF6	NC_040055.1	13591054	13601218	peak_11198	10165	+	PR_intron	rna-XM_027465331.1
GXYLT1	GXYLT1	NC_040046.1	172016455	172016575	peak_1072	121	+	utr5	rna-XM_027457101.1	GXYLT1	NC_040046.1	172016455	172016546	peak_1152	92	+	utr5	rna-XM_027457101.1
LOC101795408	LOC101795408	NC_040055.1	13705580	13709390	peak_10721	3811	+	PR_intron	rna-XM_027464906.1	LOC101795408	NC_040055.1	13705044	13705135	peak_11200	92	+	PR_intron	rna-XM_027464906.1
HTATSF1	HTATSF1	NC_040055.1	13989609	13992708	peak_10724	3100	+	PR_intron	rna-XM_027465030.1	HTATSF1	NC_040055.1	13989609	13994317	peak_11202	4709	+	PR_intron	rna-XM_027465030.1
XKRX	XKRX	NC_040055.1	14895566	14896567	peak_10726	1002	+	PR_intron	rna-XM_027465463.1	XKRX	NC_040055.1	14909850	14910269	peak_11206	420	+	utr3	rna-XM_027465458.1
TRMT12	TRMT12	NC_040055.1	14927176	14927446	peak_10730	271	+	cds	rna-XM_027465455.1	TRMT12	NC_040055.1	14927146	14927446	peak_11207	301	+	cds	rna-XM_027465455.1
PCDH19	PCDH19	NC_040055.1	14998640	14999061	peak_10731	422	+	cds	rna-XM_027465009.1	PCDH19	NC_040055.1	14998580	14999031	peak_11208	452	+	cds	rna-XM_027465009.1
CHM	CHM	NC_040055.1	18567580	18571163	peak_10736	3584	+	PR_intron	rna-XM_027465383.1	CHM	NC_040055.1	18571012	18571193	peak_11213	182	+	cds	rna-XM_027465383.1
HDX	HDX	NC_040055.1	18941400	18941641	peak_10739	242	+	cds	rna-XM_021266825.2	HDX	NC_040055.1	18941370	18941641	peak_11215	272	+	cds	rna-XM_021266825.2
DNAJB9	DNAJB9	NC_040046.1	173103239	173103420	peak_1074	182	+	utr5	rna-XM_027457306.1	DNAJB9	NC_040046.1	173103578	173103669	peak_1154	92	+	PR_intron	rna-XM_027457297.1
RPS6KA6	RPS6KA6	NC_040055.1	18995361	19003399	peak_10740	8039	+	PR_intron	rna-XM_013092029.3	RPS6KA6	NC_040055.1	18995272	19003429	peak_11217	8158	+	PR_intron	rna-XM_013092029.3
LOC101802153	LOC101802153	NC_040055.1	19421037	19427466	peak_10742	6430	+	PR_intron	rna-XM_027465185.1	LOC101802153	NC_040055.1	19421008	19427495	peak_11218	6488	+	PR_intron	rna-XM_027465185.1
BRWD3	BRWD3	NC_040055.1	19483282	19484520	peak_10743	1239	+	PR_intron	rna-XM_027465384.1	BRWD3	NC_040055.1	19483282	19484490	peak_11219	1209	+	PR_intron	rna-XM_027465384.1
LAS1L	LAS1L	NC_040055.1	19579915	19582173	peak_10747	2259	+	PR_intron	rna-XM_027465234.1	LAS1L	NC_040055.1	19579885	19582173	peak_11224	2289	+	PR_intron	rna-XM_027465234.1
ZC4H2	ZC4H2	NC_040055.1	19646873	19652999	peak_10749	6127	+	PR_intron	rna-XM_005020893.4	ZC4H2	NC_040055.1	19647019	19653058	peak_11226	6040	+	PR_intron	rna-XM_005020893.4
TTC1	TTC1	NC_040055.1	184934	199124	peak_10752	14191	-	PR_intron	rna-XM_027465317.1	TTC1	NC_040055.1	184934	199094	peak_11228	14161	-	PR_intron	rna-XM_027465317.1
LOC101802145	LOC101802145	NC_040055.1	637237	637418	peak_10753	182	-	cds	rna-XM_027465502.1	LOC101802145	NC_040055.1	637177	637478	peak_11229	302	-	cds	rna-XM_027465502.1
PPARGC1B	PPARGC1B	NC_040055.1	674166	674347	peak_10755	182	-	utr3	rna-XM_027465501.1	PPARGC1B	NC_040055.1	674076	674317	peak_11231	242	-	utr3	rna-XM_027465501.1
LOC110351750	LOC110351750	NC_040055.1	808296	808357	peak_10758	62	-	cds	rna-XM_027465090.1	LOC110351750	NC_040055.1	812235	818464	peak_11237	6230	-	PR_intron	rna-XM_027465090.1
PCYOX1L	PCYOX1L	NC_040055.1	828540	828897	peak_10761	358	-	cds	rna-XM_027464874.1	PCYOX1L	NC_040055.1	828540	828897	peak_11238	358	-	cds	rna-XM_027464874.1
GRPEL2	GRPEL2	NC_040055.1	844289	844828	peak_10763	540	-	utr5	rna-XM_027464875.1	GRPEL2	NC_040055.1	837126	837307	peak_11240	182	-	cds	rna-XM_027464875.1
AFAP1L1	AFAP1L1	NC_040055.1	845520	845790	peak_10764	271	-	NP_exon	rna-XR_003499407.1	AFAP1L1	NC_040055.1	845550	845790	peak_11242	241	-	NP_exon	rna-XR_003499407.1
ABLIM3	ABLIM3	NC_040055.1	873443	873534	peak_10768	92	-	PR_intron	rna-XM_027465102.1	ABLIM3	NC_040055.1	874330	875639	peak_11245	1310	-	PR_intron	rna-XM_027465109.1
IFRD1	IFRD1	NC_040046.1	174672804	174673244	peak_1077	441	+	PR_intron	rna-XM_027457370.1	IFRD1	NC_040046.1	174672325	174673215	peak_1159	891	+	PR_intron	rna-XM_027457370.1
STAG2	STAG2	NC_040055.1	2556586	2557505	peak_10782	920	-	PR_intron	rna-XM_027465359.1	STAG2	NC_040055.1	2556586	2557475	peak_11254	890	-	PR_intron	rna-XM_027465359.1
XIAP	XIAP	NC_040055.1	2641428	2643313	peak_10784	1886	-	PR_intron	rna-XM_005022126.4	XIAP	NC_040055.1	2630238	2630359	peak_11256	122	-	utr3	rna-XM_027465319.1
GRIA3	GRIA3	NC_040055.1	2794992	2796357	peak_10787	1366	-	PR_intron	rna-XM_027465323.1	GRIA3	NC_040055.1	2785579	2796327	peak_11260	10749	-	PR_intron	rna-XM_027465323.1
ZBTB33	ZBTB33	NC_040055.1	3523139	3523290	peak_10788	152	-	cds	rna-XM_027465526.1	ZBTB33	NC_040055.1	3523169	3523350	peak_11263	182	-	cds	rna-XM_027465526.1
LOC113844728	LOC113844728	NC_040055.1	3562644	3562853	peak_10791	210	-	utr3	rna-XM_027465190.1	LOC113844728	NC_040055.1	3562733	3562823	peak_11265	91	-	utr3	rna-XM_027465190.1
LOC101795745	LOC101795745	NC_040055.1	4277873	4282221	peak_10793	4349	-	PR_intron	rna-XM_005009013.4	LOC101795745	NC_040055.1	4277843	4282191	peak_11267	4349	-	PR_intron	rna-XM_005009013.4
LOC101795245	LOC101795245	NC_040055.1	4344126	4344515	peak_10795	390	-	cds	rna-XM_027465520.1	LOC101795245	NC_040055.1	4344096	4344545	peak_11271	450	-	cds	rna-XM_027465520.1
RLIM	RLIM	NC_040055.1	4458505	4458715	peak_10796	211	-	cds	rna-XM_005009005.4	RLIM	NC_040055.1	4458475	4458715	peak_11273	241	-	cds	rna-XM_005009005.4
NEXMIF	NEXMIF	NC_040055.1	4482575	4482755	peak_10799	181	-	utr3	rna-XM_027465183.1	NEXMIF	NC_040055.1	4482605	4482785	peak_11276	181	-	utr3	rna-XM_027465183.1
FOXP2	FOXP2	NC_040046.1	175723943	175749504	peak_1080	25562	+	PR_intron	rna-XM_027457488.1	FOXP2	NC_040046.1	175721502	175722989	peak_1160	1488	+	NP_intron	rna-XR_002407053.2
ABCB7	ABCB7	NC_040055.1	4632542	4635591	peak_10803	3050	-	PR_intron	rna-XM_027464995.1	ABCB7	NC_040055.1	4632602	4635621	peak_11283	3020	-	PR_intron	rna-XM_027464995.1
ATRX	ATRX	NC_040055.1	4945157	4945728	peak_10804	572	-	utr3	rna-XM_027464969.1	ATRX	NC_040055.1	4945187	4945968	peak_11285	782	-	utr3	rna-XM_027464969.1
MDFIC	MDFIC	NC_040046.1	175851899	175851990	peak_1081	92	+	PR_intron	rna-XM_005010978.4	MDFIC	NC_040046.1	175850360	175852421	peak_1162	2062	+	PR_intron	rna-XM_005010978.4
MAGT1	MAGT1	NC_040055.1	5053048	5054105	peak_10811	1058	-	PR_intron	rna-XM_027465162.1	MAGT1	NC_040055.1	5053048	5054105	peak_11291	1058	-	PR_intron	rna-XM_027465162.1
SERTM2	SERTM2	NC_040055.1	5356858	5356918	peak_10812	61	-	utr3	rna-XM_027465250.1	SERTM2	NC_040055.1	5356678	5357098	peak_11292	421	-	utr3	rna-XM_027465250.1
PAK3	PAK3	NC_040055.1	5559120	5559330	peak_10814	211	-	utr3	rna-XM_027465355.1	PAK3	NC_040055.1	5559120	5559330	peak_11295	211	-	utr3	rna-XM_027465355.1
TMEM164	TMEM164	NC_040055.1	5896057	5896117	peak_10819	61	-	cds	rna-XM_005015214.4	TMEM164	NC_040055.1	5896057	5896207	peak_11298	151	-	cds	rna-XM_005015214.4
NXT2	NXT2	NC_040055.1	6014591	6014862	peak_10822	272	-	cds	rna-XM_005015226.4	NXT2	NC_040055.1	6014561	6014892	peak_11299	332	-	cds	rna-XM_005015226.4
COL4A5	COL4A5	NC_040055.1	6121037	6121367	peak_10823	331	-	utr3	rna-XM_027465431.1	COL4A5	NC_040055.1	6121067	6121367	peak_11300	301	-	utr3	rna-XM_027465431.1
LOC101804640	LOC101804640	NC_040055.1	6367589	6367797	peak_10825	209	-	utr3	rna-XM_027465366.1	LOC101804640	NC_040055.1	6367589	6367738	peak_11301	150	-	utr3	rna-XM_027465366.1
TSC22D3	TSC22D3	NC_040055.1	6424211	6424419	peak_10826	209	-	utr3	rna-XM_027465047.1	TSC22D3	NC_040055.1	6424181	6424449	peak_11303	269	-	utr3	rna-XM_027465047.1
OCRL	OCRL	NC_040055.1	6600282	6600529	peak_10829	248	-	PR_intron	rna-XM_027465278.1	OCRL	NC_040055.1	6600311	6600529	peak_11305	219	-	PR_intron	rna-XM_027465278.1
TES	TES	NC_040046.1	176506620	176527403	peak_1083	20784	+	PR_intron	rna-XM_027457623.1	TES	NC_040046.1	176506620	176527432	peak_1164	20813	+	PR_intron	rna-XM_027457623.1
PIN4	PIN4	NC_040055.1	6615473	6616079	peak_10830	607	-	cds	rna-XM_027465304.1	PIN4	NC_040055.1	6615415	6616079	peak_11306	665	-	cds	rna-XM_027465304.1
ZDHHC9	ZDHHC9	NC_040055.1	6667290	6669214	peak_10831	1925	-	PR_intron	rna-XM_027464904.1	ZDHHC9	NC_040055.1	6667290	6669214	peak_11307	1925	-	PR_intron	rna-XM_027464904.1
LOC101800121	LOC101800121	NC_040055.1	6746471	6746592	peak_10832	122	-	utr3	rna-XM_021273168.2	LOC101800121	NC_040055.1	6750133	6750343	peak_11308	211	-	cds	rna-XM_021273168.2
ENOX2	ENOX2	NC_040055.1	6828137	6839031	peak_10838	10895	-	PR_intron	rna-XM_027465285.1	ENOX2	NC_040055.1	6828137	6839061	peak_11312	10925	-	PR_intron	rna-XM_027465285.1
MET	MET	NC_040046.1	176659917	176660096	peak_1084	180	+	PR_intron	rna-XM_027457654.1	MET	NC_040046.1	176659946	176660125	peak_1165	180	+	PR_intron	rna-XM_027457654.1
RBMX2	RBMX2	NC_040055.1	6886154	6886542	peak_10840	389	-	cds	rna-XM_027464885.1	RBMX2	NC_040055.1	6886154	6886542	peak_11314	389	-	cds	rna-XM_027464885.1
RAB33A	RAB33A	NC_040055.1	6888667	6888961	peak_10841	295	-	cds	rna-XM_027464886.1	RAB33A	NC_040055.1	6888311	6889019	peak_11315	709	-	cds	rna-XM_027464886.1
MARS2	MARS2	NC_040055.1	6894384	6894445	peak_10842	62	-	utr3	rna-XM_027464884.1	MARS2	NC_040055.1	6895943	6896124	peak_11316	182	-	cds	rna-XM_027464884.1
NDUFA1	NDUFA1	NC_040055.1	6944096	6944727	peak_10845	632	-	PR_intron	rna-XM_027465447.1	NDUFA1	NC_040055.1	6944096	6944727	peak_11318	632	-	PR_intron	rna-XM_027465447.1
SOWAHD	SOWAHD	NC_040055.1	6959966	6960235	peak_10846	270	-	cds	rna-XM_027465372.1	SOWAHD	NC_040055.1	6959966	6960235	peak_11319	270	-	cds	rna-XM_027465372.1
UBE2A	UBE2A	NC_040055.1	6999151	6999392	peak_10847	242	-	utr3	rna-XM_027465262.1	UBE2A	NC_040055.1	6999151	6999362	peak_11320	212	-	utr3	rna-XM_027465262.1
SLC25A43	SLC25A43	NC_040055.1	7018225	7018493	peak_10848	269	-	utr3	rna-XM_027465259.1	SLC25A43	NC_040055.1	7018255	7018522	peak_11321	268	-	utr3	rna-XM_027465259.1
PGRMC1	PGRMC1	NC_040055.1	7061333	7061394	peak_10850	62	-	utr5	rna-XM_027465276.1	PGRMC1	NC_040055.1	7061333	7061394	peak_11324	62	-	utr5	rna-XM_027465276.1
VMA21	VMA21	NC_040055.1	7962722	7962931	peak_10852	210	-	cds	rna-XM_027465341.1	VMA21	NC_040055.1	7962752	7964178	peak_11326	1427	-	PR_intron	rna-XM_027465341.1
GPR50	GPR50	NC_040055.1	8060263	8060324	peak_10854	62	-	cds	rna-XM_013100493.3	GPR50	NC_040055.1	8060114	8060384	peak_11327	271	-	cds	rna-XM_013100493.3
HMGB3	HMGB3	NC_040055.1	8092956	8113557	peak_10856	20602	-	PR_intron	rna-XM_027464923.1	HMGB3	NC_040055.1	8092985	8113557	peak_11329	20573	-	PR_intron	rna-XM_027464923.1
MTMR1	MTMR1	NC_040055.1	8193735	8193826	peak_10857	92	-	cds	rna-XM_027465076.1	MTMR1	NC_040055.1	8193676	8193826	peak_11330	151	-	cds	rna-XM_027465076.1
MTM1	MTM1	NC_040055.1	8217980	8218957	peak_10858	978	-	PR_intron	rna-XM_027465080.1	MTM1	NC_040055.1	8196981	8197042	peak_11331	62	-	utr3	rna-XM_027465080.1
MAMLD1	MAMLD1	NC_040055.1	8250513	8250932	peak_10859	420	-	cds	rna-XM_005020488.4	MAMLD1	NC_040055.1	8250215	8250454	peak_11333	240	-	cds	rna-XM_005020488.4
TMEM185A	TMEM185A	NC_040055.1	8509534	8509742	peak_10861	209	-	cds	rna-XM_027465087.1	TMEM185A	NC_040055.1	8509564	8509772	peak_11337	209	-	cds	rna-XM_027465087.1
AFF2	AFF2	NC_040055.1	8638180	8638421	peak_10862	242	-	utr3	rna-XM_027465060.1	AFF2	NC_040055.1	8639829	8639980	peak_11338	152	-	utr3	rna-XM_027465060.1
FMR1	FMR1	NC_040055.1	9089936	9094065	peak_10870	4130	-	PR_intron	rna-XM_005020499.4	FMR1	NC_040055.1	9089936	9094065	peak_11345	4130	-	PR_intron	rna-XM_005020499.4
LOC101802647	LOC101802647	NC_040055.1	10806314	10806465	peak_10872	152	-	utr3	rna-XM_027465159.1	LOC101802647	NC_040055.1	10806823	10807034	peak_11347	212	-	utr3	rna-XM_027465159.1
FATE1	FATE1	NC_040055.1	11087624	11087715	peak_10876	92	-	utr3	rna-XM_027465018.1	FATE1	NC_040055.1	11087594	11087775	peak_11348	182	-	utr3	rna-XM_027465018.1
PRRG3	PRRG3	NC_040055.1	11096275	11096545	peak_10877	271	-	utr3	rna-XM_027465023.1	PRRG3	NC_040055.1	11096037	11096217	peak_11349	181	-	utr3	rna-XM_027465023.1
RIPPLY1	RIPPLY1	NC_040055.1	11101793	11102092	peak_10881	300	-	cds	rna-XM_027465024.1	RIPPLY1	NC_040055.1	11101793	11102092	peak_11353	300	-	cds	rna-XM_027465024.1
MORC4	MORC4	NC_040055.1	11115492	11116013	peak_10882	522	-	PR_intron	rna-XM_013097626.3	MORC4	NC_040055.1	11115462	11116132	peak_11354	671	-	PR_intron	rna-XM_013097626.3
RBM41	RBM41	NC_040055.1	11129060	11129358	peak_10884	299	-	utr3	rna-XM_027465193.1	RBM41	NC_040055.1	11129060	11129388	peak_11358	329	-	utr3	rna-XM_027465193.1
NUP62CL	NUP62CL	NC_040055.1	11138211	11139221	peak_10885	1011	-	PR_intron	rna-XM_027465169.1	NUP62CL	NC_040055.1	11138211	11139221	peak_11359	1011	-	PR_intron	rna-XM_027465169.1
LOC101801033	LOC101801033	NC_040055.1	11292847	11295033	peak_10886	2187	-	PR_intron	rna-XM_027464925.1	LOC101801033	NC_040055.1	11292847	11294973	peak_11360	2127	-	PR_intron	rna-XM_027464925.1
LOC110354169	LOC110354169	NC_040055.1	11307281	11307549	peak_10888	269	-	cds	rna-XM_027464930.1	LOC110354169	NC_040055.1	11307162	11307579	peak_11361	418	-	cds	rna-XM_027464930.1
CENPI	CENPI	NC_040055.1	11352350	11352560	peak_10889	211	-	utr3	rna-XM_013107146.3	CENPI	NC_040055.1	11351961	11352201	peak_11363	241	-	utr3	rna-XM_013107146.3
F8	F8	NC_040055.1	11426046	11426317	peak_10890	272	-	cds	rna-XM_027465529.1	F8	NC_040055.1	11426046	11426287	peak_11368	242	-	cds	rna-XM_027465529.1
CMC4	CMC4	NC_040055.1	11454031	11456475	peak_10894	2445	-	PR_intron	rna-XM_021270292.2	CMC4	NC_040055.1	11453971	11457491	peak_11370	3521	-	PR_intron	rna-XM_021270292.2
GCNA	GCNA	NC_040055.1	11468681	11469609	peak_10896	929	-	PR_intron	rna-XM_027465216.1	GCNA	NC_040055.1	11468681	11469639	peak_11372	959	-	PR_intron	rna-XM_027465216.1
OGT	OGT	NC_040055.1	11477720	11478050	peak_10898	331	-	utr3	rna-XM_027465213.1	OGT	NC_040055.1	11477720	11478050	peak_11374	331	-	utr3	rna-XM_027465213.1
TAF1	TAF1	NC_040055.1	11502168	11503625	peak_10899	1458	-	PR_intron	rna-XM_027465209.1	TAF1	NC_040055.1	11502168	11503625	peak_11375	1458	-	PR_intron	rna-XM_027465209.1
CAPZA2	CAPZA2	NC_040046.1	176829312	176843561	peak_1090	14250	+	PR_intron	rna-XM_027457675.1	CAPZA2	NC_040046.1	176829312	176845557	peak_1167	16246	+	PR_intron	rna-XM_027457675.1
RHOG	RHOG	NC_040055.1	11535320	11535951	peak_10904	632	-	cds	rna-XM_027465489.1	RHOG	NC_040055.1	11535260	11535651	peak_11382	392	-	cds	rna-XM_027465489.1
ITGB1BP2	ITGB1BP2	NC_040055.1	11544799	11545154	peak_10905	356	-	cds	rna-XM_005016612.4	ITGB1BP2	NC_040055.1	11544828	11545095	peak_11384	268	-	cds	rna-XM_005016612.4
NONO	NONO	NC_040055.1	11557640	11561038	peak_10907	3399	-	PR_intron	rna-XM_027465486.1	NONO	NC_040055.1	11557640	11561068	peak_11385	3429	-	PR_intron	rna-XM_027465486.1
FOXO4	FOXO4	NC_040055.1	11638679	11638979	peak_10909	301	-	utr3	rna-XM_027465143.1	FOXO4	NC_040055.1	11638679	11638949	peak_11388	271	-	utr3	rna-XM_027465143.1
LOC113844723	LOC113844723	NC_040055.1	11693158	11693218	peak_10913	61	-	utr3	rna-XM_027465151.1	LOC113844723	NC_040055.1	11693187	11693306	peak_11392	120	-	utr3	rna-XM_027465151.1
DLG3	DLG3	NC_040055.1	11731008	11731189	peak_10915	182	-	utr3	rna-XM_027464917.1	DLG3	NC_040055.1	11732237	11732987	peak_11394	751	-	utr3	rna-XM_027464917.1
LRCH2	LRCH2	NC_040055.1	12223531	12226566	peak_10918	3036	-	PR_intron	rna-XM_027464938.1	LRCH2	NC_040055.1	12227724	12233489	peak_11396	5766	-	PR_intron	rna-XM_027464938.1
KLHL13	KLHL13	NC_040055.1	12629453	12631370	peak_10919	1918	-	PR_intron	rna-XM_027464942.1	KLHL13	NC_040055.1	12629424	12631370	peak_11398	1947	-	PR_intron	rna-XM_027464942.1
CFTR	CFTR	NC_040046.1	177152634	177152785	peak_1092	152	+	cds	rna-XM_027457775.1	CFTR	NC_040046.1	177192370	177192461	peak_1168	92	+	utr3	rna-XM_027457775.1
RAP2C	RAP2C	NC_040055.1	12930931	12937151	peak_10921	6221	-	PR_intron	rna-XM_027465015.1	RAP2C	NC_040055.1	12930931	12937151	peak_11401	6221	-	PR_intron	rna-XM_027465015.1
MBNL3	MBNL3	NC_040055.1	12960051	12960291	peak_10922	241	-	utr3	rna-XM_013101748.3	MBNL3	NC_040055.1	12960021	12960291	peak_11402	271	-	utr3	rna-XM_013101748.3
HS6ST2	HS6ST2	NC_040055.1	13074026	13074653	peak_10923	628	-	cds	rna-XM_027464993.1	HS6ST2	NC_040055.1	13073996	13074623	peak_11403	628	-	cds	rna-XM_027464993.1
GPC4	GPC4	NC_040055.1	13298475	13299291	peak_10924	817	-	PR_intron	rna-XM_013109802.2	GPC4	NC_040055.1	13298445	13299291	peak_11404	847	-	PR_intron	rna-XM_013109802.2
LOC101793542	LOC101793542	NC_040055.1	13692989	13693128	peak_10925	140	-	PR_intron	rna-XM_027465117.1	LOC101793542	NC_040055.1	13692989	13693128	peak_11408	140	-	PR_intron	rna-XM_027465117.1
MMGT1	MMGT1	NC_040055.1	13804705	13804825	peak_10926	121	-	cds	rna-XM_027464992.1	MMGT1	NC_040055.1	13804705	13804825	peak_11409	121	-	cds	rna-XM_027464992.1
MAP7D3	MAP7D3	NC_040055.1	13873698	13883631	peak_10927	9934	-	PR_intron	rna-XM_027464990.1	MAP7D3	NC_040055.1	13873668	13884052	peak_11410	10385	-	PR_intron	rna-XM_027464990.1
LOC101800968	LOC101800968	NC_040046.1	177441454	177441933	peak_1093	480	+	cds	rna-XM_027455508.1	LOC101800968	NC_040046.1	177441424	177441963	peak_1169	540	+	cds	rna-XM_027455508.1
ARHGEF6	ARHGEF6	NC_040055.1	14039362	14041838	peak_10930	2477	-	PR_intron	rna-XM_021275254.2	ARHGEF6	NC_040055.1	14039332	14041808	peak_11412	2477	-	PR_intron	rna-XM_021275254.2
RBMX	RBMX	NC_040055.1	14083540	14083721	peak_10932	182	-	utr3	rna-XM_027465236.1	RBMX	NC_040055.1	14083540	14083750	peak_11414	211	-	utr3	rna-XM_027465236.1
FGF13	FGF13	NC_040055.1	14462772	14463102	peak_10934	331	-	utr3	rna-XM_027465299.1	FGF13	NC_040055.1	14462892	14463072	peak_11416	181	-	utr3	rna-XM_027465299.1
MCF2	MCF2	NC_040055.1	14772070	14775735	peak_10935	3666	-	PR_intron	rna-XM_027465293.1	MCF2	NC_040055.1	14761999	14762150	peak_11418	152	-	utr3	rna-XM_027465293.1
ATP11C	ATP11C	NC_040055.1	14823204	14823415	peak_10936	212	-	utr3	rna-XM_027464861.1	ATP11C	NC_040055.1	14823264	14823475	peak_11419	212	-	utr3	rna-XM_027464861.1
CSTF2	CSTF2	NC_040055.1	14919356	14919753	peak_10940	398	-	PR_intron	rna-XM_027465468.1	CSTF2	NC_040055.1	14919326	14919812	peak_11423	487	-	PR_intron	rna-XM_027465468.1
SRPX2	SRPX2	NC_040055.1	14940229	14940468	peak_10941	240	-	utr3	rna-XM_027465477.1	SRPX2	NC_040055.1	14940229	14940438	peak_11424	210	-	utr3	rna-XM_027465477.1
TNMD	TNMD	NC_040055.1	14958387	14959259	peak_10944	873	-	PR_intron	rna-XM_005017253.4	TNMD	NC_040055.1	14958357	14959319	peak_11426	963	-	PR_intron	rna-XM_005017253.4
DIAPH2	DIAPH2	NC_040055.1	15639473	15658505	peak_10945	19033	-	NP_intron	rna-XR_003499557.1	DIAPH2	NC_040055.1	15632276	15658505	peak_11428	26230	-	NP_intron	rna-XR_003499557.1
PCDH11X	PCDH11X	NC_040055.1	16832632	16832723	peak_10949	92	-	cds	rna-XM_027465498.1	PCDH11X	NC_040055.1	16460970	16461151	peak_11432	182	-	PR_intron	rna-XM_027465492.1
DACH2	DACH2	NC_040055.1	18258151	18260866	peak_10951	2716	-	PR_intron	rna-XM_027464920.1	DACH2	NC_040055.1	18244590	18260866	peak_11434	16277	-	PR_intron	rna-XM_027464920.1
LOC113844699	LOC113844699	NC_040055.1	18529893	18530126	peak_10952	234	-	NP_exon	gene-LOC113844699.trans	LOC113844699	NC_040055.1	18529836	18530068	peak_11435	233	-	NP_exon	gene-LOC113844699.trans
ZNF711	ZNF711	NC_040055.1	18676487	18677687	peak_10953	1201	-	cds	rna-XM_027465507.1	ZNF711	NC_040055.1	18676457	18677717	peak_11436	1261	-	cds	rna-XM_027465507.1
LOC101798971	LOC101798971	NC_040055.1	19312165	19312402	peak_10959	238	-	utr3	rna-XM_005011488.4	LOC101798971	NC_040055.1	19312224	19312314	peak_11441	91	-	utr3	rna-XM_005011488.4
LOC101801757	LOC101801757	NC_040055.1	19334401	19334791	peak_10961	391	-	utr3	rna-XM_027465326.1	LOC101801757	NC_040055.1	19334521	19337113	peak_11443	2593	-	PR_intron	rna-XM_027465326.1
SH3BGRL	SH3BGRL	NC_040055.1	19406649	19406949	peak_10962	301	-	utr5	rna-XM_027464976.1	SH3BGRL	NC_040055.1	19406649	19406949	peak_11444	301	-	utr5	rna-XM_027464976.1
ZC3H12B	ZC3H12B	NC_040055.1	19614599	19614720	peak_10963	122	-	utr3	rna-XM_013100860.3	ZC3H12B	NC_040055.1	19614569	19614780	peak_11445	212	-	cds	rna-XM_013100860.3
MAP1A	MAP1A	NC_040056.1	167139	168698	peak_10968	1560	+	cds	rna-XM_027466426.1	MAP1A	NC_040056.1	167169	168668	peak_11449	1500	+	cds	rna-XM_027466426.1
0c363208-761b-44f3-99d0-e2f2596d6366	0c363208-761b-44f3-99d0-e2f2596d6366	NC_040056.1	178430	178611	peak_10975	182	+	NP_exon	0c363208-761b-44f3-99d0-e2f2596d6366.trans	0c363208-761b-44f3-99d0-e2f2596d6366	NC_040056.1	178404	178555	peak_11454	152	+	NP_exon	0c363208-761b-44f3-99d0-e2f2596d6366.trans
FURIN	FURIN	NC_040056.1	253334	253574	peak_10976	241	+	cds	rna-XM_027466007.1	FURIN	NC_040056.1	253304	253604	peak_11456	301	+	cds	rna-XM_027466007.1
FES	FES	NC_040056.1	261592	261831	peak_10978	240	+	PR_intron	rna-XM_027466003.1	FES	NC_040056.1	257712	257988	peak_11458	277	+	cds	rna-XM_027466003.1
MAN2A2	MAN2A2	NC_040056.1	274021	274291	peak_10979	271	+	utr3	rna-XM_027466218.1	MAN2A2	NC_040056.1	274021	274291	peak_11460	271	+	utr3	rna-XM_027466218.1
RCCD1	RCCD1	NC_040056.1	286664	286888	peak_10980	225	+	PR_intron	rna-XM_027466661.1	RCCD1	NC_040056.1	287714	287893	peak_11462	180	+	utr3	rna-XM_027466661.1
IDH2	IDH2	NC_040056.1	348505	348596	peak_10981	92	+	utr3	rna-XM_027466587.1	IDH2	NC_040056.1	348445	348536	peak_11463	92	+	utr3	rna-XM_027466587.1
AP3S2	AP3S2	NC_040056.1	393401	393549	peak_10982	149	+	utr3	rna-XM_027466593.1	AP3S2	NC_040056.1	393431	393549	peak_11464	119	+	utr3	rna-XM_027466593.1
ANPEP	ANPEP	NC_040056.1	398187	398277	peak_10983	91	+	cds	rna-XM_027466576.1	ANPEP	NC_040056.1	403312	403462	peak_11465	151	+	utr3	rna-XM_027466576.1
BLM	BLM	NC_040056.1	510840	511748	peak_10985	909	+	PR_intron	rna-XM_027466109.1	BLM	NC_040056.1	513995	514145	peak_11466	151	+	cds	rna-XM_027466109.1
WDR76	WDR76	NC_040056.1	529556	531922	peak_10989	2367	+	PR_intron	rna-XM_027466352.1	WDR76	NC_040056.1	529586	532273	peak_11469	2688	+	PR_intron	rna-XM_027466352.1
KCND2	KCND2	NC_040046.1	178505200	178505351	peak_1099	152	+	cds	rna-XM_027457814.1	KCND2	NC_040046.1	178202648	178202709	peak_1176	62	+	cds	rna-XM_027457814.1
CASC4	CASC4	NC_040056.1	652497	655849	peak_10990	3353	+	PR_intron	rna-XM_005009253.3	CASC4	NC_040056.1	652497	655849	peak_11470	3353	+	PR_intron	rna-XM_005009253.3
CTDSPL2	CTDSPL2	NC_040056.1	696061	699965	peak_10992	3905	+	PR_intron	rna-XM_027465626.1	CTDSPL2	NC_040056.1	696031	702261	peak_11472	6231	+	PR_intron	rna-XM_027465626.1
EIF3J	EIF3J	NC_040056.1	724110	730682	peak_10996	6573	+	PR_intron	rna-XM_027465627.1	EIF3J	NC_040056.1	724081	730682	peak_11475	6602	+	PR_intron	rna-XM_027465627.1
MORF4L1	MORF4L1	NC_040056.1	837519	847183	peak_10997	9665	+	PR_intron	rna-XM_027465631.1	MORF4L1	NC_040056.1	831785	834576	peak_11476	2792	+	PR_intron	rna-XM_027465630.1
UACA	UACA	NC_040056.1	869133	869224	peak_10998	92	+	utr5	rna-XM_027465612.1	UACA	NC_040056.1	877860	878040	peak_11479	181	+	PR_intron	rna-XM_027465612.1
ND5	ND5	NC_009684.1	12884	13094	peak_11	211	+	cds	gene-ND5.trans	ND5	NC_009684.1	12884	13154	peak_13	271	+	cds	gene-ND5.trans
TLE3	TLE3	NC_040056.1	1052076	1052971	peak_11005	896	+	utr3	rna-XM_027465880.1	TLE3	NC_040056.1	1052046	1052941	peak_11485	896	+	utr3	rna-XM_027465880.1
ANP32A	ANP32A	NC_040056.1	1326068	1326279	peak_11006	212	+	utr5	rna-XM_027465690.1	ANP32A	NC_040056.1	1326068	1326279	peak_11486	212	+	utr5	rna-XM_027465690.1
AAGAB	AAGAB	NC_040056.1	1786712	1792555	peak_11008	5844	+	PR_intron	rna-XM_027466356.1	AAGAB	NC_040056.1	1786682	1792525	peak_11490	5844	+	PR_intron	rna-XM_027466356.1
SNAPC5	SNAPC5	NC_040056.1	2203721	2205043	peak_11010	1323	+	PR_intron	rna-XM_027465644.1	SNAPC5	NC_040056.1	2203721	2205073	peak_11491	1353	+	PR_intron	rna-XM_027465644.1
MEGF11	MEGF11	NC_040056.1	2272514	2272755	peak_11011	242	+	utr5	rna-XM_021269498.2	MEGF11	NC_040056.1	2272244	2272545	peak_11493	302	+	utr5	rna-XM_021269498.2
DENND4A	DENND4A	NC_040056.1	2630230	2631215	peak_11013	986	+	PR_intron	rna-XM_027466597.1	DENND4A	NC_040056.1	2632293	2632384	peak_11496	92	+	cds	rna-XM_027466597.1
DPP8	DPP8	NC_040056.1	2707220	2707520	peak_11018	301	+	utr3	rna-XM_027466113.1	DPP8	NC_040056.1	2707130	2707580	peak_11499	451	+	utr3	rna-XM_027466113.1
IGDCC4	IGDCC4	NC_040056.1	2727995	2728175	peak_11019	181	+	utr5	rna-XM_027465693.1	IGDCC4	NC_040056.1	2809475	2810044	peak_11500	570	+	utr3	rna-XM_027465697.1
CPED1	CPED1	NC_040046.1	178755680	178755771	peak_1102	92	+	utr3	rna-XM_013093575.3	CPED1	NC_040046.1	178755830	178756040	peak_1178	211	+	utr3	rna-XM_013093575.3
SPG21	SPG21	NC_040056.1	3025816	3027941	peak_11024	2126	+	PR_intron	rna-XM_027465569.1	SPG21	NC_040056.1	3025816	3027941	peak_11501	2126	+	PR_intron	rna-XM_027465569.1
SNRPA1	SNRPA1	NC_040056.1	3146930	3148957	peak_11025	2028	+	PR_intron	rna-XM_027466181.1	SNRPA1	NC_040056.1	3146900	3148987	peak_11502	2088	+	PR_intron	rna-XM_027466181.1
SELENOS	SELENOS	NC_040056.1	3150806	3151259	peak_11026	454	+	PR_intron	rna-XM_027466182.1	SELENOS	NC_040056.1	3150747	3153133	peak_11503	2387	+	PR_intron	rna-XM_027466182.1
CHSY1	CHSY1	NC_040056.1	3166165	3166346	peak_11028	182	+	utr5	rna-XM_027465886.1	CHSY1	NC_040056.1	3166165	3166316	peak_11504	152	+	utr5	rna-XM_027465886.1
06e48692-fd70-476f-a19e-c54676129b70	06e48692-fd70-476f-a19e-c54676129b70	NC_040056.1	3221834	3222075	peak_11030	242	+	NP_exon	06e48692-fd70-476f-a19e-c54676129b70.trans	06e48692-fd70-476f-a19e-c54676129b70	NC_040056.1	3221804	3222075	peak_11507	272	+	NP_exon	06e48692-fd70-476f-a19e-c54676129b70.trans
ADAMTS17	ADAMTS17	NC_040056.1	3698767	3699247	peak_11036	481	+	utr3	rna-XM_027465887.1	ADAMTS17	NC_040056.1	3698767	3699187	peak_11516	421	+	utr3	rna-XM_027465887.1
LYSMD4	LYSMD4	NC_040056.1	3719013	3719194	peak_11039	182	+	NP_exon	rna-XR_003499738.1	LYSMD4	NC_040056.1	3718983	3719074	peak_11519	92	+	NP_exon	rna-XR_003499738.1
IGF1R	IGF1R	NC_040056.1	4018675	4018886	peak_11041	212	+	cds	rna-XM_027466223.1	IGF1R	NC_040056.1	4147453	4147634	peak_11521	182	+	cds	rna-XM_027466223.1
a00f0252-04ca-4c37-b932-f1fdc0be18f9	a00f0252-04ca-4c37-b932-f1fdc0be18f9	NC_040056.1	4162059	4162869	peak_11044	811	+	NP_exon	a00f0252-04ca-4c37-b932-f1fdc0be18f9.trans	a00f0252-04ca-4c37-b932-f1fdc0be18f9	NC_040056.1	4161999	4162869	peak_11522	871	+	NP_exon	a00f0252-04ca-4c37-b932-f1fdc0be18f9.trans
WNT16	WNT16	NC_040046.1	178788466	178788646	peak_1105	181	+	cds	rna-XM_027457925.1	WNT16	NC_040046.1	178788436	178788735	peak_1179	300	+	cds	rna-XM_027457925.1
FAM169B	FAM169B	NC_040056.1	4224502	4225736	peak_11050	1235	+	PR_intron	rna-XM_013091747.3	FAM169B	NC_040056.1	4224472	4225736	peak_11528	1265	+	PR_intron	rna-XM_013091747.3
RGMA	RGMA	NC_040056.1	6278428	6283740	peak_11051	5313	+	PR_intron	rna-XM_027465779.1	RGMA	NC_040056.1	6278368	6283740	peak_11529	5373	+	PR_intron	rna-XM_027465779.1
FAM174B	FAM174B	NC_040056.1	6421675	6422156	peak_11053	482	+	utr3	rna-XM_013091762.3	FAM174B	NC_040056.1	6421526	6422126	peak_11531	601	+	utr3	rna-XM_013091762.3
AKAP13	AKAP13	NC_040056.1	6979822	6983418	peak_11055	3597	+	PR_intron	rna-XM_027466172.1	AKAP13	NC_040056.1	6979852	6979913	peak_11532	62	+	cds	rna-XM_027466172.1
AGBL1	AGBL1	NC_040056.1	7236632	7240484	peak_11061	3853	+	PR_intron	rna-XM_027466124.1	AGBL1	NC_040056.1	7237666	7240424	peak_11539	2759	+	PR_intron	rna-XM_027466124.1
MRPS11	MRPS11	NC_040056.1	7927281	7927663	peak_11065	383	+	PR_intron	rna-XM_027466208.1	MRPS11	NC_040056.1	7927191	7927663	peak_11542	473	+	PR_intron	rna-XM_027466208.1
ACAN	ACAN	NC_040056.1	8048862	8048982	peak_11067	121	+	cds	rna-XM_027466277.1	ACAN	NC_040056.1	8047965	8048205	peak_11544	241	+	cds	rna-XM_027466277.1
PTPRZ1	PTPRZ1	NC_040046.1	179039137	179039258	peak_1107	122	+	utr5	rna-XM_027457989.1	PTPRZ1	NC_040046.1	179143316	179143497	peak_1182	182	+	cds	rna-XM_027457989.1
305e1172-b73e-45fa-804c-b5b728084706	305e1172-b73e-45fa-804c-b5b728084706	NC_040056.1	8162989	8163199	peak_11070	211	+	NP_exon	305e1172-b73e-45fa-804c-b5b728084706.trans	305e1172-b73e-45fa-804c-b5b728084706	NC_040056.1	8163079	8163229	peak_11549	151	+	NP_exon	305e1172-b73e-45fa-804c-b5b728084706.trans
TICRR	TICRR	NC_040056.1	8280433	8280494	peak_11071	62	+	cds	rna-XM_027465634.1	TICRR	NC_040056.1	8280373	8280553	peak_11550	181	+	cds	rna-XM_027465634.1
55afb182-b97c-4f30-8926-f20498b98666	55afb182-b97c-4f30-8926-f20498b98666	NC_040056.1	8283481	8283841	peak_11073	361	+	NP_exon	55afb182-b97c-4f30-8926-f20498b98666.trans	55afb182-b97c-4f30-8926-f20498b98666	NC_040056.1	8283468	8283757	peak_11553	290	+	NP_exon	55afb182-b97c-4f30-8926-f20498b98666.trans
LOC101796528	LOC101796528	NC_040056.1	8296598	8296748	peak_11075	151	+	cds	rna-XM_027465638.1	LOC101796528	NC_040056.1	8296717	8296808	peak_11554	92	+	cds	rna-XM_027465638.1
MINAR1	MINAR1	NC_040056.1	8390456	8390577	peak_11077	122	+	cds	rna-XM_005030686.4	MINAR1	NC_040056.1	8396862	8397073	peak_11555	212	+	utr3	rna-XM_005030686.4
ARNT2	ARNT2	NC_040056.1	8676432	8683211	peak_11081	6780	+	PR_intron	rna-XM_013106565.3	ARNT2	NC_040056.1	8683210	8690549	peak_11556	7340	+	PR_intron	rna-XM_013106565.3
TLNRD1	TLNRD1	NC_040056.1	8990799	8991277	peak_11084	479	+	cds	rna-XM_027466720.1	TLNRD1	NC_040056.1	8990799	8991217	peak_11559	419	+	cds	rna-XM_027466720.1
LOC101795095	LOC101795095	NC_040056.1	9822343	9823483	peak_11089	1141	+	PR_intron	rna-XM_027466447.1	LOC101795095	NC_040056.1	9822284	9823454	peak_11566	1171	+	PR_intron	rna-XM_027466447.1
HDGFL3	HDGFL3	NC_040056.1	10065982	10077374	peak_11091	11393	+	PR_intron	rna-XM_027466361.1	HDGFL3	NC_040056.1	10065982	10069310	peak_11573	3329	+	PR_intron	rna-XM_027466361.1
BTBD1	BTBD1	NC_040056.1	10123470	10123561	peak_11092	92	+	cds	rna-XM_027466064.1	BTBD1	NC_040056.1	10124157	10124337	peak_11574	181	+	utr3	rna-XM_027466064.1
C11H15orf40	C11H15orf40	NC_040056.1	10124591	10128172	peak_11094	3582	+	PR_intron	rna-XM_027466068.1	C11H15orf40	NC_040056.1	10124649	10128142	peak_11575	3494	+	PR_intron	rna-XM_027466068.1
HOMER2	HOMER2	NC_040056.1	10213318	10222298	peak_11095	8981	+	PR_intron	rna-XM_027466065.1	HOMER2	NC_040056.1	10213318	10222238	peak_11577	8921	+	PR_intron	rna-XM_027466065.1
USP8	USP8	NC_040056.1	10524730	10529489	peak_11098	4760	+	PR_intron	rna-XM_027466332.1	USP8	NC_040056.1	10524670	10529459	peak_11578	4790	+	PR_intron	rna-XM_027466332.1
LMOD2	LMOD2	NC_040046.1	179818819	179824086	peak_1110	5268	+	PR_intron	rna-XM_005013153.4	LMOD2	NC_040046.1	179823906	179823967	peak_1183	62	+	cds	rna-XM_005013153.4
5aa4e18a-ab88-4a71-85b4-e68e6850a5a2	5aa4e18a-ab88-4a71-85b4-e68e6850a5a2	NC_040056.1	10912272	10912512	peak_11101	241	+	NP_exon	5aa4e18a-ab88-4a71-85b4-e68e6850a5a2.trans	5aa4e18a-ab88-4a71-85b4-e68e6850a5a2	NC_040056.1	10912272	10912512	peak_11581	241	+	NP_exon	5aa4e18a-ab88-4a71-85b4-e68e6850a5a2.trans
ZNF592	ZNF592	NC_040056.1	10932748	10933137	peak_11105	390	+	cds	rna-XM_005017208.4	ZNF592	NC_040056.1	10932807	10933137	peak_11585	331	+	cds	rna-XM_005017208.4
SEC11A	SEC11A	NC_040056.1	10970696	10976160	peak_11109	5465	+	PR_intron	rna-XM_027466184.1	SEC11A	NC_040056.1	10970725	10976348	peak_11589	5624	+	PR_intron	rna-XM_027466184.1
c501566b-e345-4e96-8f62-98fb79202418	c501566b-e345-4e96-8f62-98fb79202418	NC_040056.1	11134279	11134518	peak_11110	240	+	NP_exon	c501566b-e345-4e96-8f62-98fb79202418.trans	c501566b-e345-4e96-8f62-98fb79202418	NC_040056.1	11134279	11134518	peak_11590	240	+	NP_exon	c501566b-e345-4e96-8f62-98fb79202418.trans
CSNK1G1	CSNK1G1	NC_040056.1	11222785	11223271	peak_11112	487	+	PR_intron	rna-XM_027466537.1	CSNK1G1	NC_040056.1	11222785	11223301	peak_11592	517	+	PR_intron	rna-XM_027466537.1
MYO9A	MYO9A	NC_040056.1	11614038	11614454	peak_11116	417	+	PR_intron	rna-XM_027466499.1	MYO9A	NC_040056.1	11618365	11618637	peak_11596	273	+	PR_intron	rna-XM_027466499.1
PLXNB2	PLXNB2	NC_040046.1	181741925	181742554	peak_1112	630	+	cds	rna-XM_027455568.1	PLXNB2	NC_040046.1	181741925	181742584	peak_1185	660	+	cds	rna-XM_027455568.1
726c731a-b841-4b3c-be61-49f959165300	726c731a-b841-4b3c-be61-49f959165300	NC_040056.1	11657646	11657945	peak_11123	300	+	NP_exon	726c731a-b841-4b3c-be61-49f959165300.trans	726c731a-b841-4b3c-be61-49f959165300	NC_040056.1	11657616	11657975	peak_11602	360	+	NP_exon	726c731a-b841-4b3c-be61-49f959165300.trans
ARIH1	ARIH1	NC_040056.1	11691856	11692334	peak_11125	479	+	cds	rna-XM_027466212.1	ARIH1	NC_040056.1	11691856	11692304	peak_11604	449	+	cds	rna-XM_027466212.1
BBS4	BBS4	NC_040056.1	11784432	11784643	peak_11127	212	+	cds	rna-XM_021270662.2	BBS4	NC_040056.1	11783433	11784702	peak_11607	1270	+	PR_intron	rna-XM_021270662.2
NEO1	NEO1	NC_040056.1	12091959	12092080	peak_11128	122	+	PR_intron	rna-XM_027465579.1	NEO1	NC_040056.1	11966206	11966357	peak_11608	152	+	cds	rna-XM_027465579.1
CD276	CD276	NC_040056.1	12351087	12353337	peak_11130	2251	+	PR_intron	rna-XM_027466272.1	CD276	NC_040056.1	12351087	12353308	peak_11611	2222	+	PR_intron	rna-XM_027466272.1
FAM219B	FAM219B	NC_040056.1	12502230	12503421	peak_11132	1192	+	utr5	rna-XM_027466043.1	FAM219B	NC_040056.1	12502230	12503391	peak_11614	1162	+	utr5	rna-XM_027466043.1
EDC3	EDC3	NC_040056.1	12554859	12555486	peak_11133	628	+	PR_intron	rna-XM_027466624.1	EDC3	NC_040056.1	12554859	12555457	peak_11615	599	+	PR_intron	rna-XM_027466624.1
LOC101792739	LOC101792739	NC_040056.1	12620550	12620641	peak_11137	92	+	cds	rna-XM_027466368.1	LOC101792739	NC_040056.1	12620550	12620641	peak_11619	92	+	cds	rna-XM_027466368.1
SEMA7A	SEMA7A	NC_040056.1	12658365	12659297	peak_11139	933	+	PR_intron	rna-XM_027466305.1	SEMA7A	NC_040056.1	12658365	12659297	peak_11621	933	+	PR_intron	rna-XM_027466305.1
MAPK12	MAPK12	NC_040046.1	181958575	181958756	peak_1114	182	+	utr3	rna-XM_027458258.1	MAPK12	NC_040046.1	181958515	181958666	peak_1188	152	+	utr3	rna-XM_027458258.1
LOC101796105	LOC101796105	NC_040056.1	12730546	12730818	peak_11142	273	+	cds	rna-XM_027466314.1	LOC101796105	NC_040056.1	12729088	12729552	peak_11624	465	+	PR_intron	rna-XM_027466314.1
SNX33	SNX33	NC_040056.1	12818100	12818279	peak_11145	180	+	utr5	rna-XM_005021349.4	SNX33	NC_040056.1	12818070	12818279	peak_11627	210	+	utr5	rna-XM_005021349.4
LINGO1	LINGO1	NC_040056.1	12851562	12851772	peak_11148	211	+	utr5	rna-XM_027465653.1	LINGO1	NC_040056.1	12977287	12977437	peak_11631	151	+	cds	rna-XM_027465652.1
TUBGCP6	TUBGCP6	NC_040046.1	182012029	182013042	peak_1115	1014	+	PR_intron	rna-XM_027458299.1	TUBGCP6	NC_040046.1	182011856	182012321	peak_1190	466	+	PR_intron	rna-XM_027458299.1
PEAK1	PEAK1	NC_040056.1	13271964	13272085	peak_11151	122	+	cds	rna-XM_027466103.1	PEAK1	NC_040056.1	13271964	13272324	peak_11634	361	+	cds	rna-XM_027466103.1
TSPAN3	TSPAN3	NC_040056.1	13333533	13344452	peak_11159	10920	+	PR_intron	rna-XM_027465609.1	TSPAN3	NC_040056.1	13333533	13344452	peak_11642	10920	+	PR_intron	rna-XM_027465609.1
LOC106017522	LOC106017522	NC_040046.1	182058091	182058242	peak_1116	152	+	utr3	rna-XM_027458316.1	LOC106017522	NC_040046.1	182055668	182055849	peak_1193	182	+	cds	rna-XM_027458316.1
SCAPER	SCAPER	NC_040056.1	13450236	13466637	peak_11160	16402	+	PR_intron	rna-XM_027465599.1	SCAPER	NC_040056.1	13449616	13450002	peak_11643	387	+	PR_intron	rna-XM_027465593.1
ETFA	ETFA	NC_040056.1	13607361	13624007	peak_11162	16647	+	PR_intron	rna-XM_027465604.1	ETFA	NC_040056.1	13607361	13624037	peak_11646	16677	+	PR_intron	rna-XM_027465604.1
TBC1D2B	TBC1D2B	NC_040056.1	14144786	14146026	peak_11164	1241	+	NP_intron	rna-XR_003499744.1	TBC1D2B	NC_040056.1	14177226	14180870	peak_11652	3645	+	NP_intron	rna-XR_003499743.1
DAPK2	DAPK2	NC_040056.1	14190824	14193325	peak_11166	2502	+	PR_intron	rna-XM_027465912.1	DAPK2	NC_040056.1	14190794	14193325	peak_11653	2532	+	PR_intron	rna-XM_027465912.1
HERC1	HERC1	NC_040056.1	14300607	14302563	peak_11169	1957	+	PR_intron	rna-XM_027466640.1	HERC1	NC_040056.1	14277325	14277566	peak_11656	242	+	cds	rna-XM_027466635.1
PIM3	PIM3	NC_040046.1	183290892	183291222	peak_1117	331	+	utr5	rna-XM_027458508.1	PIM3	NC_040046.1	183290892	183291132	peak_1195	241	+	utr5	rna-XM_027458508.1
LOC101791306	LOC101791306	NC_040056.1	14838040	14838430	peak_11172	391	+	cds	rna-XM_005027966.3	LOC101791306	NC_040056.1	14838010	14838430	peak_11663	421	+	cds	rna-XM_005027966.3
VPS13C	VPS13C	NC_040056.1	14947656	14950444	peak_11173	2789	+	PR_intron	rna-XM_027465720.1	VPS13C	NC_040056.1	14893553	14894626	peak_11664	1074	+	PR_intron	rna-XM_027465720.1
RORA	RORA	NC_040056.1	15492479	15492600	peak_11174	122	+	cds	rna-XM_027466151.1	RORA	NC_040056.1	15492389	15492660	peak_11665	272	+	cds	rna-XM_027466151.1
ICE2	ICE2	NC_040056.1	15515565	15516433	peak_11176	869	+	PR_intron	rna-XM_027466150.1	ICE2	NC_040056.1	15515768	15515828	peak_11667	61	+	PR_intron	rna-XM_027466150.1
BNIP2	BNIP2	NC_040056.1	15867306	15867366	peak_11178	61	+	cds	rna-XM_027465564.1	BNIP2	NC_040056.1	15867306	15867396	peak_11670	91	+	cds	rna-XM_027465564.1
GTF2A2	GTF2A2	NC_040056.1	15881806	15882016	peak_11179	211	+	utr3	rna-XM_027465568.1	GTF2A2	NC_040056.1	15881806	15882016	peak_11671	211	+	utr3	rna-XM_027465568.1
OTUD7A	OTUD7A	NC_040056.1	15928771	15928832	peak_11180	62	+	utr5	rna-XM_027466340.1	OTUD7A	NC_040056.1	16029617	16030955	peak_11672	1339	+	PR_intron	rna-XM_027466340.1
MTMR10	MTMR10	NC_040056.1	16268799	16269488	peak_11184	690	+	cds	rna-XM_013104951.2	MTMR10	NC_040056.1	16268799	16269488	peak_11679	690	+	cds	rna-XM_013104951.2
APBA2	APBA2	NC_040056.1	16369097	16379747	peak_11186	10651	+	PR_intron	rna-XM_021276260.2	APBA2	NC_040056.1	16369097	16379747	peak_11681	10651	+	PR_intron	rna-XM_021276260.2
TRADD	TRADD	NC_040056.1	16953138	16953258	peak_11188	121	+	cds	rna-XM_027466483.1	TRADD	NC_040056.1	16953228	16953617	peak_11685	390	+	utr3	rna-XM_027466483.1
B3GNT9	B3GNT9	NC_040056.1	16969575	16969756	peak_11191	182	+	cds	rna-XM_005025741.4	B3GNT9	NC_040056.1	16969456	16969845	peak_11689	390	+	cds	rna-XM_005025741.4
LOC101791437	LOC101791437	NC_040056.1	17120864	17121074	peak_11195	211	+	utr5	rna-XM_027466726.1	LOC101791437	NC_040056.1	17121163	17162669	peak_11694	41507	+	PR_intron	rna-XM_027466726.1
LOC113844914	LOC113844914	NC_040056.1	17240951	17241281	peak_11197	331	+	PR_intron	rna-XM_027466727.1	LOC113844914	NC_040056.1	17239875	17239966	peak_11695	92	+	PR_intron	rna-XM_027466727.1
MED17	MED17	NC_040046.1	10314218	10314309	peak_112	92	+	cds	rna-XM_005012858.4	MED17	NC_040046.1	10314218	10314339	peak_115	122	+	cds	rna-XM_005012858.4
BRD1	BRD1	NC_040046.1	183672417	183672478	peak_1120	62	+	PR_intron	rna-XM_027458582.1	BRD1	NC_040046.1	183676449	183677648	peak_1198	1200	+	cds	rna-XM_027458582.1
CFDP1	CFDP1	NC_040056.1	17431380	17480764	peak_11200	49385	+	PR_intron	rna-XM_027465748.1	CFDP1	NC_040056.1	17431380	17480764	peak_11700	49385	+	PR_intron	rna-XM_027465748.1
BCAR1	BCAR1	NC_040056.1	17486770	17486861	peak_11201	92	+	utr5	rna-XM_027466183.1	BCAR1	NC_040056.1	17487070	17487255	peak_11701	186	+	cds	rna-XM_027466183.1
522ef0bc-1daf-4487-bfa5-4386f2ff73f4	522ef0bc-1daf-4487-bfa5-4386f2ff73f4	NC_040056.1	17491347	17492007	peak_11205	661	+	NP_exon	522ef0bc-1daf-4487-bfa5-4386f2ff73f4.trans	522ef0bc-1daf-4487-bfa5-4386f2ff73f4	NC_040056.1	17491347	17492007	peak_11704	661	+	NP_exon	522ef0bc-1daf-4487-bfa5-4386f2ff73f4.trans
WDR59	WDR59	NC_040056.1	17512266	17512327	peak_11207	62	+	PR_intron	rna-XM_027465978.1	WDR59	NC_040056.1	17555662	17555723	peak_11706	62	+	cds	rna-XM_027465978.1
RFWD3	RFWD3	NC_040056.1	17596251	17596342	peak_11210	92	+	utr3	rna-XM_021266804.2	RFWD3	NC_040056.1	17596191	17596432	peak_11708	242	+	utr3	rna-XM_021266804.2
GLG1	GLG1	NC_040056.1	17669146	17669296	peak_11211	151	+	utr3	rna-XM_027466713.1	GLG1	NC_040056.1	17665514	17665605	peak_11709	92	+	cds	rna-XM_027466713.1
PDPR	PDPR	NC_040056.1	17696051	17696560	peak_11212	510	+	NP_exon	rna-XR_003499704.1	PDPR	NC_040056.1	17696111	17696560	peak_11712	450	+	NP_exon	rna-XR_003499704.1
SF3B3	SF3B3	NC_040056.1	17743217	17743553	peak_11214	337	+	PR_intron	rna-XM_027465684.1	SF3B3	NC_040056.1	17743217	17743553	peak_11714	337	+	PR_intron	rna-XM_027465684.1
GOT2	GOT2	NC_040056.1	17990639	17990759	peak_11215	121	+	utr3	rna-XM_027466377.1	GOT2	NC_040056.1	17990639	17990759	peak_11715	121	+	utr3	rna-XM_027466377.1
SLC38A7	SLC38A7	NC_040056.1	17996378	17996588	peak_11216	211	+	utr3	rna-XM_027466013.1	SLC38A7	NC_040056.1	17993012	17993193	peak_11716	182	+	utr5	rna-XM_027466013.1
CNOT1	CNOT1	NC_040056.1	17999249	18004852	peak_11217	5604	+	PR_intron	rna-XM_027466699.1	CNOT1	NC_040056.1	17999249	18010074	peak_11718	10826	+	PR_intron	rna-XM_027466699.1
ATP6V0D1	ATP6V0D1	NC_040056.1	18074453	18074574	peak_11218	122	+	utr5	rna-XM_027465622.1	ATP6V0D1	NC_040056.1	18074453	18074574	peak_11719	122	+	utr5	rna-XM_027465622.1
SLC9A5	SLC9A5	NC_040056.1	18167766	18167886	peak_11220	121	+	utr3	rna-XM_027465940.1	SLC9A5	NC_040056.1	18166129	18166462	peak_11721	334	+	PR_intron	rna-XM_027465940.1
PLEKHG4	PLEKHG4	NC_040056.1	18182691	18194801	peak_11221	12111	+	PR_intron	rna-XM_027465929.1	PLEKHG4	NC_040056.1	18182781	18183818	peak_11723	1038	+	PR_intron	rna-XM_027465929.1
LOC101804141	LOC101804141	NC_040056.1	18346383	18346929	peak_11228	547	+	PR_intron	rna-XM_027465962.1	LOC101804141	NC_040056.1	18346024	18346988	peak_11729	965	+	PR_intron	rna-XM_027465962.1
LOC101789642	LOC101789642	NC_040056.1	18382252	18382973	peak_11229	722	+	cds	rna-XM_027465942.1	LOC101789642	NC_040056.1	18382252	18382973	peak_11730	722	+	cds	rna-XM_027465942.1
80d3b6e4-ce5a-46d1-9124-cbbe9e7d4411	80d3b6e4-ce5a-46d1-9124-cbbe9e7d4411	NC_040056.1	18507849	18508412	peak_11230	564	+	NP_exon	80d3b6e4-ce5a-46d1-9124-cbbe9e7d4411.trans	80d3b6e4-ce5a-46d1-9124-cbbe9e7d4411	NC_040056.1	18508115	18508441	peak_11732	327	+	NP_exon	80d3b6e4-ce5a-46d1-9124-cbbe9e7d4411.trans
KIAA0895L	KIAA0895L	NC_040056.1	18509438	18509588	peak_11232	151	+	cds	rna-XM_027466325.1	KIAA0895L	NC_040056.1	18509408	18509499	peak_11735	92	+	utr5	rna-XM_027466325.1
2a9459c5-49c6-4719-b334-f53c0fcf8e62	2a9459c5-49c6-4719-b334-f53c0fcf8e62	NC_040056.1	18525943	18526033	peak_11233	91	+	NP_exon	2a9459c5-49c6-4719-b334-f53c0fcf8e62.trans	2a9459c5-49c6-4719-b334-f53c0fcf8e62	NC_040056.1	18525972	18526033	peak_11736	62	+	NP_exon	2a9459c5-49c6-4719-b334-f53c0fcf8e62.trans
EXOC3L1	EXOC3L1	NC_040056.1	18555885	18556419	peak_11235	535	+	PR_intron	rna-XM_027466322.1	EXOC3L1	NC_040056.1	18555885	18556479	peak_11738	595	+	PR_intron	rna-XM_027466322.1
CENPT	CENPT	NC_040056.1	18679582	18679883	peak_11237	302	+	cds	rna-XM_027466081.1	CENPT	NC_040056.1	18679522	18679883	peak_11740	362	+	cds	rna-XM_027466081.1
RANBP10	RANBP10	NC_040056.1	18787091	18787272	peak_11239	182	+	utr3	rna-XM_027466084.1	RANBP10	NC_040056.1	18716260	18716411	peak_11741	152	+	cds	rna-XM_027466090.1
FAM192A	FAM192A	NC_040056.1	18889982	18901553	peak_11241	11572	+	PR_intron	rna-XM_027466708.1	FAM192A	NC_040056.1	18889953	18890013	peak_11745	61	+	utr5	rna-XM_027466708.1
PARD6A	PARD6A	NC_040056.1	19041662	19041783	peak_11242	122	+	cds	rna-XM_027465671.1	PARD6A	NC_040056.1	19041602	19041693	peak_11747	92	+	cds	rna-XM_027465671.1
KIFC3	KIFC3	NC_040056.1	19259831	19259892	peak_11246	62	+	PR_intron	rna-XM_027465816.1	KIFC3	NC_040056.1	19268709	19269485	peak_11748	777	+	PR_intron	rna-XM_027465816.1
CCDC102A	CCDC102A	NC_040056.1	19355655	19355984	peak_11248	330	+	cds	rna-XM_027466093.1	CCDC102A	NC_040056.1	19353375	19353435	peak_11749	61	+	utr5	rna-XM_027466093.1
CERK	CERK	NC_040046.1	186652133	186662901	peak_1125	10769	+	PR_intron	rna-XM_027458721.1	CERK	NC_040046.1	186652133	186662901	peak_1201	10769	+	PR_intron	rna-XM_027458721.1
1a20f64e-f9db-493e-bf45-0de1ad5ff2ab	1a20f64e-f9db-493e-bf45-0de1ad5ff2ab	NC_040056.1	19362218	19362545	peak_11251	328	+	NP_exon	1a20f64e-f9db-493e-bf45-0de1ad5ff2ab.trans	1a20f64e-f9db-493e-bf45-0de1ad5ff2ab	NC_040056.1	19362218	19362485	peak_11753	268	+	NP_exon	1a20f64e-f9db-493e-bf45-0de1ad5ff2ab.trans
DOK4	DOK4	NC_040056.1	19365759	19366385	peak_11253	627	+	PR_intron	rna-XM_027465754.1	DOK4	NC_040056.1	19363379	19365730	peak_11755	2352	+	PR_intron	rna-XM_027465754.1
MAP1LC3B	MAP1LC3B	NC_040056.1	19524251	19524491	peak_11254	241	+	utr3	rna-XM_027466674.1	MAP1LC3B	NC_040056.1	19517319	19517469	peak_11759	151	+	utr5	rna-XM_027466673.1
JPH3	JPH3	NC_040056.1	19595688	19595898	peak_11255	211	+	cds	rna-XM_027465873.1	JPH3	NC_040056.1	19594670	19594821	peak_11761	152	+	utr5	rna-XM_027465873.1
BANP	BANP	NC_040056.1	19906058	19906328	peak_11260	271	+	utr3	rna-XM_027465795.1	BANP	NC_040056.1	19906178	19906268	peak_11767	91	+	utr3	rna-XM_027465795.1
ZNF469	ZNF469	NC_040056.1	20119158	20119339	peak_11261	182	+	cds	rna-XM_027465782.1	ZNF469	NC_040056.1	20119098	20119339	peak_11768	242	+	cds	rna-XM_027465782.1
CELSR1	CELSR1	NC_040046.1	186910766	186911097	peak_1127	332	+	utr5	rna-XM_027458791.1	CELSR1	NC_040046.1	186910766	186911067	peak_1202	302	+	utr5	rna-XM_027458791.1
2823ded7-739f-42a7-8d16-a2d35c103b91	2823ded7-739f-42a7-8d16-a2d35c103b91	NC_040056.1	20168383	20168564	peak_11277	182	+	NP_exon	2823ded7-739f-42a7-8d16-a2d35c103b91.trans	2823ded7-739f-42a7-8d16-a2d35c103b91	NC_040056.1	20168323	20168594	peak_11779	272	+	NP_exon	2823ded7-739f-42a7-8d16-a2d35c103b91.trans
ZC3H18	ZC3H18	NC_040056.1	20173955	20185478	peak_11283	11524	+	PR_intron	rna-XM_027465792.1	ZC3H18	NC_040056.1	20174489	20185478	peak_11785	10990	+	PR_intron	rna-XM_027465792.1
CTU2	CTU2	NC_040056.1	20228451	20229827	peak_11285	1377	+	PR_intron	rna-XM_027465809.1	CTU2	NC_040056.1	20228451	20229241	peak_11787	791	+	PR_intron	rna-XM_027465809.1
CDT1	CDT1	NC_040056.1	20258716	20259208	peak_11287	493	+	PR_intron	rna-XM_027465726.1	CDT1	NC_040056.1	20258716	20258992	peak_11789	277	+	PR_intron	rna-XM_027465726.1
ACSF3	ACSF3	NC_040056.1	20373534	20373892	peak_11290	359	+	cds	rna-XM_027466651.1	ACSF3	NC_040056.1	20373653	20373892	peak_11790	240	+	cds	rna-XM_027466651.1
SPG7	SPG7	NC_040056.1	20562719	20562780	peak_11292	62	+	cds	rna-XM_027466410.1	SPG7	NC_040056.1	20558122	20562750	peak_11794	4629	+	PR_intron	rna-XM_027466410.1
RPL13	RPL13	NC_040056.1	20590555	20591501	peak_11294	947	+	PR_intron	rna-XM_027466423.1	RPL13	NC_040056.1	20590526	20591501	peak_11796	976	+	PR_intron	rna-XM_027466423.1
CDK10	CDK10	NC_040056.1	20614505	20615392	peak_11296	888	+	PR_intron	rna-XM_027466422.1	CDK10	NC_040056.1	20614505	20615392	peak_11797	888	+	PR_intron	rna-XM_027466422.1
ZNF276	ZNF276	NC_040056.1	20625120	20626194	peak_11297	1075	+	PR_intron	rna-XM_027466411.1	ZNF276	NC_040056.1	20627102	20627312	peak_11798	211	+	cds	rna-XM_027466411.1
TCF25	TCF25	NC_040056.1	20677796	20681908	peak_11298	4113	+	PR_intron	rna-XM_027466387.1	TCF25	NC_040056.1	20677796	20681879	peak_11801	4084	+	PR_intron	rna-XM_027466387.1
TUBB3	TUBB3	NC_040056.1	20701649	20701946	peak_11300	298	+	cds	rna-XM_027465875.1	TUBB3	NC_040056.1	20701738	20701916	peak_11803	179	+	cds	rna-XM_027465875.1
GAS8	GAS8	NC_040056.1	20711275	20711623	peak_11301	349	+	cds	rna-XM_005030488.4	GAS8	NC_040056.1	20711245	20713540	peak_11804	2296	+	PR_intron	rna-XM_005030488.4
NFAT5	NFAT5	NC_040056.1	20838436	20838766	peak_11303	331	+	cds	rna-XM_027466608.1	NFAT5	NC_040056.1	20838466	20843515	peak_11805	5050	+	PR_intron	rna-XM_027466608.1
WWP2	WWP2	NC_040056.1	20899451	20900853	peak_11307	1403	+	PR_intron	rna-XM_027465849.1	WWP2	NC_040056.1	20899451	20900823	peak_11809	1373	+	PR_intron	rna-XM_027465849.1
ZFHX3	ZFHX3	NC_040056.1	21422916	21423606	peak_11308	691	+	cds	rna-XM_027466394.1	ZFHX3	NC_040056.1	21422886	21423606	peak_11811	721	+	cds	rna-XM_027466394.1
ZNF821	ZNF821	NC_040056.1	21692776	21692986	peak_11316	211	+	utr5	rna-XM_027466685.1	ZNF821	NC_040056.1	21692866	21692927	peak_11823	62	+	utr5	rna-XM_027466688.1
AP1G1	AP1G1	NC_040056.1	21756907	21757177	peak_11319	271	+	utr3	rna-XM_005028793.4	AP1G1	NC_040056.1	21756847	21757177	peak_11827	331	+	utr3	rna-XM_005028793.4
PHLPP2	PHLPP2	NC_040056.1	21761824	21762413	peak_11320	590	+	PR_intron	rna-XM_027466395.1	PHLPP2	NC_040056.1	21761794	21762413	peak_11830	620	+	PR_intron	rna-XM_027466395.1
KARS	KARS	NC_040056.1	21834992	21836252	peak_11322	1261	+	PR_intron	rna-XM_027466159.1	KARS	NC_040056.1	21834992	21836252	peak_11833	1261	+	PR_intron	rna-XM_027466159.1
ADAT1	ADAT1	NC_040056.1	21845167	21845674	peak_11323	508	+	NP_exon	rna-XR_001195058.3	ADAT1	NC_040056.1	21845435	21845674	peak_11834	240	+	NP_exon	rna-XR_001195058.3
LOC101804775	LOC101804775	NC_040056.1	21889721	21890111	peak_11326	391	+	cds	rna-XM_027466163.1	LOC101804775	NC_040056.1	21889691	21890171	peak_11837	481	+	cds	rna-XM_027466163.1
IQGAP1	IQGAP1	NC_040056.1	19268	19855	peak_11327	588	-	PR_intron	rna-XM_027466297.1	IQGAP1	NC_040056.1	19268	19885	peak_11839	618	-	PR_intron	rna-XM_027466297.1
TP53BP1	TP53BP1	NC_040056.1	83105	83196	peak_11331	92	-	cds	rna-XM_027466295.1	TP53BP1	NC_040056.1	83135	83256	peak_11842	122	-	cds	rna-XM_027466295.1
PPIP5K1	PPIP5K1	NC_040056.1	185478	186078	peak_11335	601	-	utr3	rna-XM_013105030.3	PPIP5K1	NC_040056.1	185478	185779	peak_11846	302	-	utr3	rna-XM_013105030.3
PRC1	PRC1	NC_040056.1	288676	288826	peak_11337	151	-	utr3	rna-XM_027466658.1	PRC1	NC_040056.1	287899	288019	peak_11849	121	-	utr3	rna-XM_027466658.1
LRRK2	LRRK2	NC_040046.1	187801415	187801934	peak_1134	520	+	utr5	rna-XM_027458956.1	LRRK2	NC_040046.1	187801385	187801596	peak_1208	212	+	utr5	rna-XM_027458956.1
TTLL6	TTLL6	NC_040056.1	302262	302323	peak_11341	62	-	cds	rna-XM_027466667.1	TTLL6	NC_040056.1	301641	302263	peak_11856	623	-	PR_intron	rna-XM_027466667.1
4836b7cd-ddec-43bc-8798-2114fead8c81	4836b7cd-ddec-43bc-8798-2114fead8c81	NC_040056.1	317441	317560	peak_11342	120	-	NP_exon	4836b7cd-ddec-43bc-8798-2114fead8c81.trans	4836b7cd-ddec-43bc-8798-2114fead8c81	NC_040056.1	317470	317648	peak_11858	179	-	NP_exon	4836b7cd-ddec-43bc-8798-2114fead8c81.trans
ZNF710	ZNF710	NC_040056.1	350455	351150	peak_11343	696	-	PR_intron	rna-XM_027466582.1	ZNF710	NC_040056.1	350455	351150	peak_11862	696	-	PR_intron	rna-XM_027466582.1
2955f80d-c3db-45b9-9615-3a1304421b5d	2955f80d-c3db-45b9-9615-3a1304421b5d	NC_040056.1	413603	413752	peak_11346	150	-	NP_exon	2955f80d-c3db-45b9-9615-3a1304421b5d.trans	2955f80d-c3db-45b9-9615-3a1304421b5d	NC_040056.1	413603	413811	peak_11864	209	-	NP_exon	2955f80d-c3db-45b9-9615-3a1304421b5d.trans
02cdfd9c-498e-44af-8f4c-13e33263afa1	02cdfd9c-498e-44af-8f4c-13e33263afa1	NC_040056.1	539066	539186	peak_11351	121	-	NP_exon	02cdfd9c-498e-44af-8f4c-13e33263afa1.trans	02cdfd9c-498e-44af-8f4c-13e33263afa1	NC_040056.1	540347	540467	peak_11868	121	-	NP_exon	02cdfd9c-498e-44af-8f4c-13e33263afa1.trans
SPG11	SPG11	NC_040056.1	746257	746467	peak_11356	211	-	cds	rna-XM_027465625.1	SPG11	NC_040056.1	746287	746467	peak_11870	181	-	cds	rna-XM_027465625.1
ADAMTS7	ADAMTS7	NC_040056.1	797709	797830	peak_11357	122	-	cds	rna-XM_027466354.1	ADAMTS7	NC_040056.1	797679	797890	peak_11871	212	-	cds	rna-XM_027466354.1
LAMB1	LAMB1	NC_040046.1	187993768	187994202	peak_1136	435	+	PR_intron	rna-XM_027459003.1	LAMB1	NC_040046.1	187993678	187994202	peak_1210	525	+	PR_intron	rna-XM_027459003.1
KIF23	KIF23	NC_040056.1	1211440	1211620	peak_11360	181	-	cds	rna-XM_027466275.1	KIF23	NC_040056.1	1211440	1211620	peak_11874	181	-	cds	rna-XM_027466275.1
GLCE	GLCE	NC_040056.1	1242531	1243370	peak_11363	840	-	cds	rna-XM_027465844.1	GLCE	NC_040056.1	1242382	1243340	peak_11877	959	-	NP_exon	rna-XR_003499732.1
FEM1B	FEM1B	NC_040056.1	1461182	1461451	peak_11365	270	-	cds	rna-XM_005022963.2	FEM1B	NC_040056.1	1461122	1461511	peak_11880	390	-	cds	rna-XM_005022963.2
PIAS1	PIAS1	NC_040056.1	1485445	1485685	peak_11369	241	-	cds	rna-XM_027465618.1	PIAS1	NC_040056.1	1485445	1485745	peak_11883	301	-	cds	rna-XM_027465618.1
SMAD3	SMAD3	NC_040056.1	1802246	1802756	peak_11373	511	-	utr3	rna-XM_005030067.4	SMAD3	NC_040056.1	1802216	1802726	peak_11886	511	-	utr3	rna-XM_005030067.4
ZWILCH	ZWILCH	NC_040056.1	2197363	2197971	peak_11376	609	-	PR_intron	rna-XM_027465640.1	ZWILCH	NC_040056.1	2197605	2197911	peak_11890	307	-	PR_intron	rna-XM_027465640.1
DIS3L	DIS3L	NC_040056.1	2258210	2258420	peak_11377	211	-	cds	rna-XM_027466487.1	DIS3L	NC_040056.1	2258240	2258479	peak_11891	240	-	cds	rna-XM_027466487.1
PDCD7	PDCD7	NC_040056.1	3000012	3001977	peak_11379	1966	-	PR_intron	rna-XM_021276346.2	PDCD7	NC_040056.1	3000012	3002066	peak_11894	2055	-	PR_intron	rna-XM_021276346.2
CCDC71L	CCDC71L	NC_040046.1	188515599	188515957	peak_1138	359	+	cds	rna-XM_027459190.1	CCDC71L	NC_040046.1	188515569	188515957	peak_1213	389	+	cds	rna-XM_027459190.1
ANKDD1A	ANKDD1A	NC_040056.1	3047371	3050562	peak_11381	3192	-	PR_intron	rna-XM_027465570.1	ANKDD1A	NC_040056.1	3047371	3050503	peak_11895	3133	-	PR_intron	rna-XM_027465570.1
PLEKHO2	PLEKHO2	NC_040056.1	3067397	3068475	peak_11382	1079	-	cds	rna-XM_027465571.1	PLEKHO2	NC_040056.1	3067367	3068505	peak_11896	1139	-	cds	rna-XM_027465571.1
4054c3da-ef1c-48a4-94f1-aadf80929a1a	4054c3da-ef1c-48a4-94f1-aadf80929a1a	NC_040056.1	3230146	3230507	peak_11383	362	-	NP_exon	4054c3da-ef1c-48a4-94f1-aadf80929a1a.trans	4054c3da-ef1c-48a4-94f1-aadf80929a1a	NC_040056.1	3230176	3230477	peak_11898	302	-	NP_exon	4054c3da-ef1c-48a4-94f1-aadf80929a1a.trans
LRRK1	LRRK1	NC_040056.1	3230146	3232923	peak_11384	2778	-	PR_intron	rna-XM_027466358.1	LRRK1	NC_040056.1	3230176	3233631	peak_11899	3456	-	PR_intron	rna-XM_027466358.1
ALDH1A3	ALDH1A3	NC_040056.1	3311984	3312494	peak_11386	511	-	utr3	rna-XM_005011090.4	ALDH1A3	NC_040056.1	3312194	3312374	peak_11901	181	-	utr3	rna-XM_005011090.4
ASB7	ASB7	NC_040056.1	3421856	3422096	peak_11388	241	-	utr3	rna-XM_021266612.2	ASB7	NC_040056.1	3421886	3422096	peak_11903	211	-	utr3	rna-XM_021266612.2
MEF2A	MEF2A	NC_040056.1	3728733	3728794	peak_11393	62	-	utr3	rna-XM_027465892.1	MEF2A	NC_040056.1	3729452	3729603	peak_11908	152	-	cds	rna-XM_027465892.1
LRRC28	LRRC28	NC_040056.1	3857528	3857829	peak_11395	302	-	utr3	rna-XM_027465898.1	LRRC28	NC_040056.1	3857528	3857799	peak_11910	272	-	utr3	rna-XM_027465898.1
SYNM	SYNM	NC_040056.1	3932753	3933023	peak_11397	271	-	cds	rna-XM_027465718.1	SYNM	NC_040056.1	3932723	3933053	peak_11912	331	-	cds	rna-XM_027465718.1
PANX1	PANX1	NC_040046.1	10456681	10456830	peak_114	150	+	cds	rna-XM_027467497.1	PANX1	NC_040046.1	10456770	10458937	peak_116	2168	+	PR_intron	rna-XM_027467497.1
ATXN7L1	ATXN7L1	NC_040046.1	188901244	188902054	peak_1140	811	+	cds	rna-XM_013103528.3	ATXN7L1	NC_040046.1	188877283	188887767	peak_1215	10485	+	PR_intron	rna-XM_013103528.3
ARRDC4	ARRDC4	NC_040056.1	4394332	4394392	peak_11404	61	-	utr3	rna-XM_013091753.3	ARRDC4	NC_040056.1	4394004	4394154	peak_11920	151	-	utr3	rna-XM_013091753.3
NR2F2	NR2F2	NC_040056.1	5045728	5045997	peak_11406	270	-	utr3	rna-XM_005011108.4	NR2F2	NC_040056.1	5045728	5045997	peak_11923	270	-	utr3	rna-XM_005011108.4
CHD2	CHD2	NC_040056.1	6292191	6292431	peak_11409	241	-	utr3	rna-XM_027465995.1	CHD2	NC_040056.1	6291412	6291503	peak_11929	92	-	utr3	rna-XM_027465995.1
ST8SIA2	ST8SIA2	NC_040056.1	6445599	6445779	peak_11417	181	-	utr3	rna-XM_027466259.1	ST8SIA2	NC_040056.1	6445510	6445809	peak_11936	300	-	utr3	rna-XM_027466259.1
SRPK2	SRPK2	NC_040046.1	189024453	189070567	peak_1142	46115	+	PR_intron	rna-XM_027463867.1	SRPK2	NC_040046.1	189088740	189093693	peak_1217	4954	+	PR_intron	rna-XM_027463867.1
SLCO3A1	SLCO3A1	NC_040056.1	6523769	6524460	peak_11420	692	-	utr3	rna-XM_027466359.1	SLCO3A1	NC_040056.1	6523829	6524430	peak_11939	602	-	utr3	rna-XM_027466359.1
SV2B	SV2B	NC_040056.1	6815781	6815842	peak_11422	62	-	cds	rna-XM_027466233.1	SV2B	NC_040056.1	6815452	6815662	peak_11941	211	-	cds	rna-XM_027466233.1
KLHL25	KLHL25	NC_040056.1	7095371	7095670	peak_11423	300	-	utr3	rna-XM_027466175.1	KLHL25	NC_040056.1	7095490	7095581	peak_11944	92	-	utr3	rna-XM_027466175.1
MRPL46	MRPL46	NC_040056.1	7924792	7925118	peak_11428	327	-	cds	rna-XM_027466207.1	MRPL46	NC_040056.1	7924704	7925059	peak_11946	356	-	utr3	rna-XM_027466207.1
DET1	DET1	NC_040056.1	7940344	7940732	peak_11430	389	-	utr3	rna-XM_005017114.2	DET1	NC_040056.1	7940344	7940911	peak_11948	568	-	utr3	rna-XM_005017114.2
MFGE8	MFGE8	NC_040056.1	8073013	8073223	peak_11431	211	-	utr3	rna-XM_027466128.1	MFGE8	NC_040056.1	8073013	8073193	peak_11950	181	-	utr3	rna-XM_027466128.1
POLG	POLG	NC_040056.1	8170844	8172512	peak_11436	1669	-	PR_intron	rna-XM_027465854.1	POLG	NC_040056.1	8171023	8172542	peak_11955	1520	-	PR_intron	rna-XM_027465854.1
KIF7	KIF7	NC_040056.1	8284895	8285045	peak_11439	151	-	utr3	rna-XM_027466360.1	KIF7	NC_040056.1	8284805	8285105	peak_11957	301	-	utr3	rna-XM_027466360.1
PEX11A	PEX11A	NC_040056.1	8307196	8307257	peak_11446	62	-	utr3	rna-XM_005030683.3	PEX11A	NC_040056.1	8306926	8307017	peak_11962	92	-	utr3	rna-XM_005030683.3
LOC101800329	LOC101800329	NC_040056.1	8519744	8519804	peak_11449	61	-	cds	rna-XM_027466238.1	LOC101800329	NC_040056.1	8519774	8523356	peak_11964	3583	-	PR_intron	rna-XM_027466238.1
MESD	MESD	NC_040056.1	8972058	8972179	peak_11450	122	-	utr3	rna-XM_027466719.1	MESD	NC_040056.1	8975356	8976608	peak_11965	1253	-	PR_intron	rna-XM_027466719.1
TMC3	TMC3	NC_040056.1	9157510	9157721	peak_11453	212	-	utr5	rna-XM_027465739.1	TMC3	NC_040056.1	9157900	9161002	peak_11967	3103	-	PR_intron	rna-XM_027465739.1
MEX3B	MEX3B	NC_040056.1	9488513	9488603	peak_11455	91	-	utr3	rna-XM_027466170.1	MEX3B	NC_040056.1	9489611	9489879	peak_11968	269	-	cds	rna-XM_027466170.1
EFL1	EFL1	NC_040056.1	9532947	9543394	peak_11459	10448	-	PR_intron	rna-XM_027466446.1	EFL1	NC_040056.1	9532917	9543394	peak_11970	10478	-	PR_intron	rna-XM_027466446.1
DNAJC2	DNAJC2	NC_040046.1	190005412	190011125	peak_1146	5714	+	PR_intron	rna-XM_027459467.1	DNAJC2	NC_040046.1	190005412	190011125	peak_1220	5714	+	PR_intron	rna-XM_027459467.1
ADAMTSL3	ADAMTSL3	NC_040056.1	9616869	9617858	peak_11462	990	-	PR_intron	rna-XM_027466442.1	ADAMTSL3	NC_040056.1	9816570	9816780	peak_11565	211	+	NP_intron	rna-XR_003499852.1
RAMAC	RAMAC	NC_040056.1	10148397	10150285	peak_11466	1889	-	PR_intron	rna-XM_027466069.1	RAMAC	NC_040056.1	10148397	10150315	peak_11976	1919	-	PR_intron	rna-XM_027466069.1
WHAMM	WHAMM	NC_040056.1	10238139	10238348	peak_11468	210	-	cds	rna-XM_005026944.3	WHAMM	NC_040056.1	10238198	10238289	peak_11977	92	-	cds	rna-XM_005026944.3
NAPEPLD	NAPEPLD	NC_040046.1	190057774	190058045	peak_1147	272	+	cds	rna-XM_005013657.4	NAPEPLD	NC_040046.1	190041944	190042004	peak_1221	61	+	PR_intron	rna-XM_013094002.3
PDE8A	PDE8A	NC_040056.1	10306097	10314110	peak_11471	8014	-	PR_intron	rna-XM_027466408.1	PDE8A	NC_040056.1	10287021	10287082	peak_11981	62	-	utr3	rna-XM_027466408.1
GABPB1	GABPB1	NC_040056.1	10495830	10502064	peak_11474	6235	-	PR_intron	rna-XM_027466338.1	GABPB1	NC_040056.1	10495830	10502064	peak_11984	6235	-	PR_intron	rna-XM_027466338.1
TRPM7	TRPM7	NC_040056.1	10559183	10561593	peak_11476	2411	-	PR_intron	rna-XM_027466330.1	TRPM7	NC_040056.1	10559183	10561473	peak_11986	2291	-	PR_intron	rna-XM_027466330.1
SPPL2A	SPPL2A	NC_040056.1	10616131	10616252	peak_11479	122	-	utr3	rna-XM_027465878.1	SPPL2A	NC_040056.1	10616101	10616282	peak_11990	182	-	utr3	rna-XM_027465878.1
LOC106016306	LOC106016306	NC_040056.1	10802170	10802261	peak_11482	92	-	utr5	rna-XM_027466022.1	LOC106016306	NC_040056.1	10802140	10802261	peak_11993	122	-	cds	rna-XM_027466022.1
SHF	SHF	NC_040056.1	10808666	10809146	peak_11483	481	-	utr3	rna-XM_027466148.1	SHF	NC_040056.1	10808636	10809116	peak_11994	481	-	utr3	rna-XM_027466148.1
ALPK3	ALPK3	NC_040056.1	10855686	10859691	peak_11485	4006	-	PR_intron	rna-XM_027466655.1	ALPK3	NC_040056.1	10848754	10848874	peak_11996	121	-	utr3	rna-XM_027466655.1
RBPMS2	RBPMS2	NC_040056.1	11089361	11100579	peak_11487	11219	-	NP_intron	rna-XR_003499763.1	RBPMS2	NC_040056.1	11100309	11100430	peak_12001	122	-	NP_exon	rna-XR_003499763.1
ZNF609	ZNF609	NC_040056.1	11137981	11138807	peak_11488	827	-	utr3	rna-XM_027466517.1	ZNF609	NC_040056.1	11137742	11138658	peak_12002	917	-	utr3	rna-XM_027466517.1
PTPN12	PTPN12	NC_040046.1	190361148	190392935	peak_1149	31788	+	PR_intron	rna-XM_027459634.1	PTPN12	NC_040046.1	190361148	190392906	peak_1224	31759	+	PR_intron	rna-XM_027459634.1
SNX1	SNX1	NC_040056.1	11335900	11336631	peak_11493	732	-	PR_intron	rna-XM_027466534.1	SNX1	NC_040056.1	11335717	11338031	peak_12008	2315	-	PR_intron	rna-XM_027466534.1
PATL2	PATL2	NC_040056.1	11352484	11352693	peak_11494	210	-	cds	rna-XM_027466524.1	PATL2	NC_040056.1	11347465	11347964	peak_12009	500	-	PR_intron	rna-XM_027466524.1
AP3B2	AP3B2	NC_040056.1	11407523	11409478	peak_11495	1956	-	PR_intron	rna-XM_027466518.1	AP3B2	NC_040056.1	11407523	11408249	peak_12011	727	-	PR_intron	rna-XM_027466518.1
GRAMD2A	GRAMD2A	NC_040056.1	11623223	11623461	peak_11505	239	-	utr3	rna-XM_027466542.1	GRAMD2A	NC_040056.1	11623252	11623431	peak_12019	180	-	utr3	rna-XM_027466542.1
PKM	PKM	NC_040056.1	11639711	11639861	peak_11507	151	-	cds	rna-XM_027466521.1	PKM	NC_040056.1	11639681	11639861	peak_12021	181	-	cds	rna-XM_027466521.1
ADPGK	ADPGK	NC_040056.1	11793893	11794194	peak_11509	302	-	cds	rna-XM_027466215.1	ADPGK	NC_040056.1	11793863	11794313	peak_12023	451	-	cds	rna-XM_027466215.1
INSYN1	INSYN1	NC_040056.1	12369402	12369612	peak_11511	211	-	cds	rna-XM_027466273.1	INSYN1	NC_040056.1	12369492	12369642	peak_12024	151	-	cds	rna-XM_027466273.1
C11H15orf39	C11H15orf39	NC_040056.1	12453381	12453561	peak_11514	181	-	utr3	rna-XM_027466267.1	C11H15orf39	NC_040056.1	12452624	12453112	peak_12026	489	-	PR_intron	rna-XM_027466267.1
SCAMP5	SCAMP5	NC_040056.1	12488035	12488443	peak_11518	409	-	cds	rna-XM_005017179.4	SCAMP5	NC_040056.1	12488152	12488241	peak_12030	90	-	cds	rna-XM_005017179.4
CSK	CSK	NC_040056.1	12528945	12529292	peak_11519	348	-	PR_intron	rna-XM_027466157.1	CSK	NC_040056.1	12528915	12530587	peak_12032	1673	-	PR_intron	rna-XM_027466157.1
3844a453-1def-4ada-a66d-11df6ff380dc	3844a453-1def-4ada-a66d-11df6ff380dc	NC_040046.1	190433709	190433889	peak_1152	181	+	NP_exon	3844a453-1def-4ada-a66d-11df6ff380dc.trans	3844a453-1def-4ada-a66d-11df6ff380dc	NC_040046.1	190433709	190433859	peak_1227	151	+	NP_exon	3844a453-1def-4ada-a66d-11df6ff380dc.trans
CLK3	CLK3	NC_040056.1	12579871	12580109	peak_11520	239	-	utr3	rna-XM_027466626.1	CLK3	NC_040056.1	12579841	12580109	peak_12033	269	-	utr3	rna-XM_027466626.1
ARID3B	ARID3B	NC_040056.1	12588907	12589148	peak_11521	242	-	utr3	rna-XM_027466632.1	ARID3B	NC_040056.1	12618698	12619028	peak_12034	331	-	cds	rna-XM_027466632.1
ISLR2	ISLR2	NC_040056.1	12712546	12712697	peak_11523	152	-	cds	rna-XM_027466311.1	ISLR2	NC_040056.1	12712846	12713086	peak_12038	241	-	cds	rna-XM_027466311.1
PML	PML	NC_040056.1	12722166	12722494	peak_11525	329	-	cds	rna-XM_027466315.1	PML	NC_040056.1	12722196	12722494	peak_12039	299	-	cds	rna-XM_027466315.1
SIN3A	SIN3A	NC_040056.1	12772424	12772664	peak_11526	241	-	utr3	rna-XM_027465810.1	SIN3A	NC_040056.1	12772424	12772664	peak_12040	241	-	utr3	rna-XM_027465810.1
RSBN1L	RSBN1L	NC_040046.1	190454717	190454897	peak_1153	181	+	cds	rna-XM_027459654.1	RSBN1L	NC_040046.1	190455135	190479004	peak_1228	23870	+	PR_intron	rna-XM_027459654.1
SNUPN	SNUPN	NC_040056.1	12809877	12810114	peak_11532	238	-	cds	rna-XM_027465658.1	SNUPN	NC_040056.1	12809877	12810174	peak_12046	298	-	cds	rna-XM_027465658.1
6eac3d56-3ac3-4687-9b1b-7fc3e6f570c3	6eac3d56-3ac3-4687-9b1b-7fc3e6f570c3	NC_040056.1	12825508	12825895	peak_11534	388	-	NP_exon	6eac3d56-3ac3-4687-9b1b-7fc3e6f570c3.trans	6eac3d56-3ac3-4687-9b1b-7fc3e6f570c3	NC_040056.1	12825508	12825895	peak_12048	388	-	NP_exon	6eac3d56-3ac3-4687-9b1b-7fc3e6f570c3.trans
CSPG4	CSPG4	NC_040056.1	12832678	12832859	peak_11536	182	-	cds	rna-XM_027466369.1	CSPG4	NC_040056.1	12831961	12832082	peak_12052	122	-	cds	rna-XM_027466369.1
HMG20A	HMG20A	NC_040056.1	13155520	13155731	peak_11538	212	-	utr3	rna-XM_027466107.1	HMG20A	NC_040056.1	13155580	13155731	peak_12054	152	-	utr3	rna-XM_027466107.1
PSTPIP1	PSTPIP1	NC_040056.1	13368151	13368272	peak_11542	122	-	utr3	rna-XM_005025076.4	PSTPIP1	NC_040056.1	13368121	13368272	peak_12057	152	-	utr3	rna-XM_005025076.4
TMEM266	TMEM266	NC_040056.1	13649739	13649799	peak_11546	61	-	utr3	rna-XM_027465601.1	TMEM266	NC_040056.1	13649680	13650037	peak_12060	358	-	utr3	rna-XM_027465601.1
FBXO22	FBXO22	NC_040056.1	13755418	13755748	peak_11548	331	-	cds	rna-XM_027466621.1	FBXO22	NC_040056.1	13753503	13753623	peak_12063	121	-	utr3	rna-XM_027466621.1
UBE2Q2	UBE2Q2	NC_040056.1	13761779	13764309	peak_11549	2531	-	PR_intron	rna-XM_027466619.1	UBE2Q2	NC_040056.1	13761868	13764220	peak_12065	2353	-	PR_intron	rna-XM_027466619.1
PSMA4	PSMA4	NC_040056.1	13927631	13928388	peak_11551	758	-	PR_intron	rna-XM_027466474.1	PSMA4	NC_040056.1	13927631	13928417	peak_12067	787	-	PR_intron	rna-XM_027466474.1
DNAJA4	DNAJA4	NC_040056.1	14032849	14035030	peak_11552	2182	-	PR_intron	rna-XM_027465915.1	DNAJA4	NC_040056.1	14032937	14034912	peak_12069	1976	-	PR_intron	rna-XM_027465915.1
FBXL22	FBXL22	NC_040056.1	14370969	14373893	peak_11554	2925	-	PR_intron	rna-XM_021277799.2	FBXL22	NC_040056.1	14371028	14373834	peak_12071	2807	-	PR_intron	rna-XM_021277799.2
RAB8B	RAB8B	NC_040056.1	14485062	14488692	peak_11556	3631	-	PR_intron	rna-XM_027466055.1	RAB8B	NC_040056.1	14478541	14478632	peak_12073	92	-	utr3	rna-XM_027466057.1
LACTB	LACTB	NC_040056.1	14520262	14520713	peak_11558	452	-	cds	rna-XM_021277803.2	LACTB	NC_040056.1	14520202	14520713	peak_12076	512	-	cds	rna-XM_021277803.2
PHTF2	PHTF2	NC_040046.1	190560428	190562173	peak_1156	1746	+	PR_intron	rna-XM_021268263.2	PHTF2	NC_040046.1	190560308	190560369	peak_1231	62	+	cds	rna-XM_021268263.2
TPM1	TPM1	NC_040056.1	14539815	14540055	peak_11561	241	-	utr3	rna-XM_027466572.1	TPM1	NC_040056.1	14539815	14540055	peak_12079	241	-	utr3	rna-XM_027466572.1
TLN2	TLN2	NC_040056.1	14729501	14731083	peak_11563	1583	-	PR_intron	rna-XM_027466633.1	TLN2	NC_040056.1	14673020	14673141	peak_12081	122	-	cds	rna-XM_027466633.1
KLF13	KLF13	NC_040056.1	16069799	16069919	peak_11564	121	-	utr3	rna-XM_005027978.4	KLF13	NC_040056.1	16072250	16072370	peak_12083	121	-	utr3	rna-XM_005027978.4
MPHOSPH10	MPHOSPH10	NC_040056.1	16294169	16294319	peak_11568	151	-	cds	rna-XM_027466201.1	MPHOSPH10	NC_040056.1	16294199	16294289	peak_12086	91	-	cds	rna-XM_027466201.1
FAM189A1	FAM189A1	NC_040056.1	16420169	16420260	peak_11570	92	-	cds	rna-XM_027466196.1	FAM189A1	NC_040056.1	16412597	16412838	peak_12088	242	-	cds	rna-XM_027466196.1
TJP1	TJP1	NC_040056.1	16586041	16587201	peak_11571	1161	-	PR_intron	rna-XM_027465587.1	TJP1	NC_040056.1	16586071	16587201	peak_12090	1131	-	PR_intron	rna-XM_027465587.1
MBTPS1	MBTPS1	NC_040056.1	16861477	16861898	peak_11576	422	-	utr3	rna-XM_027466060.1	MBTPS1	NC_040056.1	16861477	16861898	peak_12095	422	-	utr3	rna-XM_027466060.1
HSDL1	HSDL1	NC_040056.1	16894742	16895037	peak_11578	296	-	cds	rna-XM_027466262.1	HSDL1	NC_040056.1	16894742	16895037	peak_12097	296	-	cds	rna-XM_027466262.1
FBXL8	FBXL8	NC_040056.1	16938091	16938211	peak_11579	121	-	utr3	rna-XM_005025737.3	FBXL8	NC_040056.1	16938480	16938660	peak_12098	181	-	cds	rna-XM_005025737.3
C11H16orf70	C11H16orf70	NC_040056.1	16980752	16981051	peak_11581	300	-	utr3	rna-XM_027466486.1	C11H16orf70	NC_040056.1	16980782	16981051	peak_12099	270	-	utr3	rna-XM_027466486.1
CBFB	CBFB	NC_040056.1	17026158	17061337	peak_11582	35180	-	PR_intron	rna-XM_027465863.1	CBFB	NC_040056.1	17026098	17061337	peak_12100	35240	-	PR_intron	rna-XM_027465863.1
AMFR	AMFR	NC_040056.1	17256709	17256979	peak_11583	271	-	utr3	rna-XM_027466647.1	AMFR	NC_040056.1	17256679	17257009	peak_12101	331	-	utr3	rna-XM_027466647.1
ZNRF1	ZNRF1	NC_040056.1	17498820	17499060	peak_11586	241	-	utr3	rna-XM_027466061.1	ZNRF1	NC_040056.1	17498790	17499030	peak_12103	241	-	utr3	rna-XM_027466061.1
DMTF1	DMTF1	NC_040046.1	195488034	195488304	peak_1159	271	+	utr3	rna-XM_027460236.1	DMTF1	NC_040046.1	195473949	195476079	peak_1234	2131	+	PR_intron	rna-XM_027460236.1
ST3GAL2	ST3GAL2	NC_040056.1	17706789	17707028	peak_11591	240	-	utr3	rna-XM_027465615.1	ST3GAL2	NC_040056.1	17706641	17707057	peak_12108	417	-	utr3	rna-XM_027465615.1
MTSS1L	MTSS1L	NC_040056.1	17765234	17765443	peak_11593	210	-	utr3	rna-XM_027466206.1	MTSS1L	NC_040056.1	17765234	17765354	peak_12109	121	-	utr3	rna-XM_027466206.1
CMTR2	CMTR2	NC_040056.1	17955707	17956008	peak_11595	302	-	cds	rna-XM_027466028.1	CMTR2	NC_040056.1	17955707	17955948	peak_12111	242	-	cds	rna-XM_027466028.1
SETD6	SETD6	NC_040056.1	18060599	18062271	peak_11597	1673	-	PR_intron	rna-XM_021276476.2	SETD6	NC_040056.1	18060689	18062331	peak_12113	1643	-	PR_intron	rna-XM_021276476.2
LOC101790169	LOC101790169	NC_040056.1	18065686	18066016	peak_11598	331	-	cds	rna-XM_027466702.1	LOC101790169	NC_040056.1	18065776	18065927	peak_12114	152	-	cds	rna-XM_027466702.1
ANKRD49	ANKRD49	NC_040046.1	10510159	10511917	peak_116	1759	+	PR_intron	rna-XM_027467555.1	ANKRD49	NC_040046.1	10510129	10511947	peak_117	1819	+	PR_intron	rna-XM_027467555.1
LOC101790936	LOC101790936	NC_040056.1	18141387	18141836	peak_11601	450	-	cds	rna-XM_027466378.1	LOC101790936	NC_040056.1	18141117	18141836	peak_12117	720	-	cds	rna-XM_027466378.1
ZDHHC1	ZDHHC1	NC_040056.1	18308018	18308198	peak_11604	181	-	cds	rna-XM_027465951.1	ZDHHC1	NC_040056.1	18307988	18308258	peak_12119	271	-	cds	rna-XM_027465951.1
EXOSC6	EXOSC6	NC_040056.1	18348042	18348278	peak_11605	237	-	utr3	rna-XM_027465966.1	EXOSC6	NC_040056.1	18347954	18348337	peak_12120	384	-	utr3	rna-XM_027465966.1
AARS	AARS	NC_040056.1	18349514	18349574	peak_11607	61	-	cds	rna-XM_027466380.1	AARS	NC_040056.1	18349424	18349664	peak_12122	241	-	cds	rna-XM_027466380.1
CTCF	CTCF	NC_040056.1	18410480	18414888	peak_11609	4409	-	PR_intron	rna-XM_027466477.1	CTCF	NC_040056.1	18410540	18414888	peak_12124	4349	-	PR_intron	rna-XM_027466477.1
DCLRE1C	DCLRE1C	NC_040046.1	195524472	195524712	peak_1161	241	+	cds	rna-XM_027460277.1	DCLRE1C	NC_040046.1	195524442	195524742	peak_1238	301	+	cds	rna-XM_027460277.1
RIPOR1	RIPOR1	NC_040056.1	18449210	18449510	peak_11612	301	-	utr3	rna-XM_027466481.1	RIPOR1	NC_040056.1	18449270	18449510	peak_12127	241	-	utr3	rna-XM_027466481.1
TMEM208	TMEM208	NC_040056.1	18526721	18526930	peak_11614	210	-	utr3	rna-XM_027466328.1	TMEM208	NC_040056.1	18526721	18526930	peak_12130	210	-	utr3	rna-XM_027466328.1
E2F4	E2F4	NC_040056.1	18542387	18542567	peak_11615	181	-	utr3	rna-XM_027466327.1	E2F4	NC_040056.1	18542417	18542626	peak_12131	210	-	utr3	rna-XM_027466327.1
PSKH1	PSKH1	NC_040056.1	18571286	18571465	peak_11618	180	-	utr3	rna-XM_005029713.4	PSKH1	NC_040056.1	18571286	18571436	peak_12135	151	-	utr3	rna-XM_005029713.4
EDC4	EDC4	NC_040056.1	18606484	18606843	peak_11622	360	-	utr3	rna-XM_027466073.1	EDC4	NC_040056.1	18606424	18606843	peak_12138	420	-	utr3	rna-XM_027466073.1
NUTF2	NUTF2	NC_040056.1	18642974	18643181	peak_11624	208	-	utr3	rna-XM_013108661.3	NUTF2	NC_040056.1	18642945	18643210	peak_12140	266	-	utr3	rna-XM_013108661.3
THAP11	THAP11	NC_040056.1	18670983	18671132	peak_11626	150	-	utr3	rna-XM_027466091.1	THAP11	NC_040056.1	18671072	18671728	peak_12142	657	-	utr3	rna-XM_027466091.1
CX3CL1	CX3CL1	NC_040056.1	18821023	18821144	peak_11629	122	-	utr3	rna-XM_005030922.4	CX3CL1	NC_040056.1	18823477	18823568	peak_12145	92	-	cds	rna-XM_005030922.4
RSPRY1	RSPRY1	NC_040056.1	18876149	18876389	peak_11631	241	-	cds	rna-XM_027465858.1	RSPRY1	NC_040056.1	18876149	18876598	peak_12146	450	-	cds	rna-XM_027465859.1
HERPUD1	HERPUD1	NC_040056.1	19031708	19031858	peak_11632	151	-	cds	rna-XM_027466255.1	HERPUD1	NC_040056.1	19031618	19031798	peak_12148	181	-	cds	rna-XM_027466256.1
ENKD1	ENKD1	NC_040056.1	19043779	19044018	peak_11633	240	-	utr3	rna-XM_027465667.1	ENKD1	NC_040056.1	19043749	19044077	peak_12149	329	-	utr3	rna-XM_027465667.1
GFOD2	GFOD2	NC_040056.1	19057231	19057561	peak_11636	331	-	utr3	rna-XM_027465666.1	GFOD2	NC_040056.1	19057260	19057471	peak_12151	212	-	utr3	rna-XM_027465666.1
GINS3	GINS3	NC_040056.1	19110312	19110728	peak_11639	417	-	cds	rna-XM_027466254.1	GINS3	NC_040056.1	19109096	19109186	peak_12155	91	-	utr3	rna-XM_027466254.1
FAM107B	FAM107B	NC_040046.1	195683059	195689730	peak_1164	6672	+	PR_intron	rna-XM_021271923.2	FAM107B	NC_040046.1	195687256	195689730	peak_1241	2475	+	PR_intron	rna-XM_021271923.2
USB1	USB1	NC_040056.1	19203205	19203474	peak_11642	270	-	utr3	rna-XM_027466718.1	USB1	NC_040056.1	19203086	19203534	peak_12159	449	-	utr3	rna-XM_027466718.1
KATNB1	KATNB1	NC_040056.1	19281997	19283148	peak_11643	1152	-	PR_intron	rna-XM_027465840.1	KATNB1	NC_040056.1	19281797	19283148	peak_12160	1352	-	PR_intron	rna-XM_027465840.1
POLR2C	POLR2C	NC_040056.1	19371838	19372018	peak_11644	181	-	utr3	rna-XM_027465759.1	POLR2C	NC_040056.1	19371838	19371988	peak_12162	151	-	utr3	rna-XM_027465759.1
GSE1	GSE1	NC_040056.1	19427216	19427547	peak_11645	332	-	cds	rna-XM_027466383.1	GSE1	NC_040056.1	19427078	19427547	peak_12163	470	-	cds	rna-XM_027466383.1
FBXO31	FBXO31	NC_040056.1	19485418	19485569	peak_11647	152	-	utr3	rna-XM_027465656.1	FBXO31	NC_040056.1	19485238	19485599	peak_12164	362	-	utr3	rna-XM_027465656.1
FRMD4A	FRMD4A	NC_040046.1	196084749	196090874	peak_1165	6126	+	PR_intron	rna-XM_027460397.1	FRMD4A	NC_040046.1	196084809	196090874	peak_1242	6066	+	PR_intron	rna-XM_027460397.1
ZCCHC14	ZCCHC14	NC_040056.1	19526677	19526858	peak_11652	182	-	utr3	rna-XM_027466672.1	ZCCHC14	NC_040056.1	19526677	19526888	peak_12169	212	-	utr3	rna-XM_027466672.1
KLHDC4	KLHDC4	NC_040056.1	19648689	19651698	peak_11656	3010	-	PR_intron	rna-XM_013097946.3	KLHDC4	NC_040056.1	19648689	19651668	peak_12173	2980	-	PR_intron	rna-XM_013097946.3
SLC7A5	SLC7A5	NC_040056.1	19693748	19693929	peak_11658	182	-	utr3	rna-XM_027465794.1	SLC7A5	NC_040056.1	19693509	19695854	peak_12175	2346	-	PR_intron	rna-XM_027465794.1
RNF166	RNF166	NC_040056.1	20223321	20223501	peak_11659	181	-	utr3	rna-XM_027465804.1	RNF166	NC_040056.1	20223291	20223501	peak_12176	211	-	utr3	rna-XM_027465804.1
bae97a29-a070-43be-af1d-ba06c393c8ca	bae97a29-a070-43be-af1d-ba06c393c8ca	NC_040056.1	20232503	20232825	peak_11661	323	-	NP_exon	bae97a29-a070-43be-af1d-ba06c393c8ca.trans	bae97a29-a070-43be-af1d-ba06c393c8ca	NC_040056.1	20232503	20232796	peak_12178	294	-	NP_exon	bae97a29-a070-43be-af1d-ba06c393c8ca.trans
PIEZO1	PIEZO1	NC_040056.1	20235914	20236656	peak_11665	743	-	cds	rna-XM_027465785.1	PIEZO1	NC_040056.1	20235914	20236656	peak_12182	743	-	cds	rna-XM_027465785.1
APRT	APRT	NC_040056.1	20263995	20264231	peak_11667	237	-	utr3	rna-XM_027465727.1	APRT	NC_040056.1	20263673	20263820	peak_12184	148	-	utr3	rna-XM_027465727.1
GALNS	GALNS	NC_040056.1	20274377	20274558	peak_11668	182	-	utr3	rna-XM_005028725.4	GALNS	NC_040056.1	20270874	20271024	peak_12186	151	-	utr3	rna-XM_005028725.4
PABPN1L	PABPN1L	NC_040056.1	20324230	20324596	peak_11669	367	-	PR_intron	rna-XM_027466654.1	PABPN1L	NC_040056.1	20324230	20324596	peak_12188	367	-	PR_intron	rna-XM_027466654.1
CBFA2T3	CBFA2T3	NC_040056.1	20327503	20328044	peak_11670	542	-	utr3	rna-XM_027466652.1	CBFA2T3	NC_040056.1	20327503	20328014	peak_12189	512	-	utr3	rna-XM_027466652.1
ANKRD11	ANKRD11	NC_040056.1	20438912	20439392	peak_11675	481	-	utr3	rna-XM_027466263.1	ANKRD11	NC_040056.1	20438912	20439452	peak_12194	541	-	utr3	rna-XM_027466263.1
BEND7	BEND7	NC_040046.1	196137596	196151056	peak_1168	13461	+	PR_intron	rna-XM_013098773.2	BEND7	NC_040046.1	196141674	196151086	peak_1245	9413	+	PR_intron	rna-XM_013098773.2
SPATA2L	SPATA2L	NC_040056.1	20618246	20618426	peak_11680	181	-	utr3	rna-XM_027466419.1	SPATA2L	NC_040056.1	20618753	20618992	peak_12201	240	-	cds	rna-XM_027466419.1
TANGO6	TANGO6	NC_040056.1	20747494	20748171	peak_11683	678	-	PR_intron	rna-XM_027465865.1	TANGO6	NC_040056.1	20747494	20748292	peak_12202	799	-	PR_intron	rna-XM_027465865.1
NOB1	NOB1	NC_040056.1	20874318	20874528	peak_11684	211	-	cds	rna-XM_027466393.1	NOB1	NC_040056.1	20874318	20874528	peak_12203	211	-	cds	rna-XM_027466393.1
PSMD7	PSMD7	NC_040056.1	20905966	20906232	peak_11685	267	-	cds	rna-XM_027465851.1	PSMD7	NC_040056.1	20905966	20906409	peak_12204	444	-	cds	rna-XM_027465851.1
DHX38	DHX38	NC_040056.1	21668939	21669513	peak_11687	575	-	PR_intron	rna-XM_027466675.1	DHX38	NC_040056.1	21668730	21668911	peak_12205	182	-	utr3	rna-XM_027466675.1
SEPHS1	SEPHS1	NC_040046.1	196212074	196212195	peak_1169	122	+	cds	rna-XM_005018832.4	SEPHS1	NC_040046.1	196207845	196212345	peak_1246	4501	+	PR_intron	rna-XM_005018832.4
DHODH	DHODH	NC_040056.1	21679535	21679714	peak_11691	180	-	utr3	rna-XM_027466689.1	DHODH	NC_040056.1	21679535	21679852	peak_12210	318	-	utr3	rna-XM_027466689.1
IST1	IST1	NC_040056.1	21683139	21683649	peak_11692	511	-	utr3	rna-XM_027466693.1	IST1	NC_040056.1	21683139	21683679	peak_12211	541	-	utr3	rna-XM_027466693.1
ATXN1L	ATXN1L	NC_040056.1	21708871	21708991	peak_11694	121	-	utr3	rna-XM_027466679.1	ATXN1L	NC_040056.1	21708361	21708482	peak_12213	122	-	utr3	rna-XM_027466679.1
TERF2IP	TERF2IP	NC_040056.1	21832994	21834625	peak_11699	1632	-	PR_intron	rna-XM_027466164.1	TERF2IP	NC_040056.1	21832994	21834625	peak_12218	1632	-	PR_intron	rna-XM_027466164.1
GABARAPL2	GABARAPL2	NC_040056.1	21866467	21869464	peak_11700	2998	-	PR_intron	rna-XM_027466169.1	GABARAPL2	NC_040056.1	21866467	21869493	peak_12219	3027	-	PR_intron	rna-XM_027466169.1
LOC101795091	LOC101795091	NC_040057.1	3540	4041	peak_11701	502	+	PR_intron	rna-XM_027467118.1	LOC101795091	NC_040057.1	3391	4928	peak_12220	1538	+	PR_intron	rna-XM_027467118.1
LRRC49	LRRC49	NC_040057.1	78964	84434	peak_11703	5471	+	PR_intron	rna-XM_027467122.1	LRRC49	NC_040057.1	61047	68334	peak_12221	7288	+	PR_intron	rna-XM_027467122.1
THSD4	THSD4	NC_040057.1	300559	300620	peak_11704	62	+	PR_intron	rna-XM_027467115.1	THSD4	NC_040057.1	181078	181229	peak_12223	152	+	cds	rna-XM_027467115.1
MYO1E	MYO1E	NC_040057.1	649128	653696	peak_11705	4569	+	PR_intron	rna-XM_013104927.2	MYO1E	NC_040057.1	649188	653696	peak_12225	4509	+	PR_intron	rna-XM_013104927.2
SLTM	SLTM	NC_040057.1	740340	743281	peak_11706	2942	+	PR_intron	rna-XM_027467111.1	SLTM	NC_040057.1	740370	743281	peak_12227	2912	+	PR_intron	rna-XM_027467111.1
ADAM10	ADAM10	NC_040057.1	791530	791591	peak_11710	62	+	utr5	rna-XM_027467123.1	ADAM10	NC_040057.1	791500	791650	peak_12231	151	+	utr5	rna-XM_027467123.1
ALDH1A2	ALDH1A2	NC_040057.1	1028932	1030382	peak_11712	1451	+	PR_intron	rna-XM_027466844.1	ALDH1A2	NC_040057.1	1028962	1029935	peak_12233	974	+	PR_intron	rna-XM_027466844.1
ZNF280D	ZNF280D	NC_040057.1	1503910	1509962	peak_11714	6053	+	PR_intron	rna-XM_027466739.1	ZNF280D	NC_040057.1	1503821	1503881	peak_12234	61	+	PR_intron	rna-XM_027466739.1
MNS1	MNS1	NC_040057.1	1585819	1586362	peak_11717	544	+	PR_intron	rna-XM_027467139.1	MNS1	NC_040057.1	1585819	1586362	peak_12239	544	+	PR_intron	rna-XM_027467139.1
RFX7	RFX7	NC_040057.1	1643483	1643544	peak_11719	62	+	PR_intron	rna-XM_027467144.1	RFX7	NC_040057.1	1696813	1696904	peak_12241	92	+	cds	rna-XM_027467144.1
CCDC3	CCDC3	NC_040046.1	196338251	196338402	peak_1172	152	+	cds	rna-XM_005018839.4	CCDC3	NC_040046.1	196338281	196338372	peak_1249	92	+	cds	rna-XM_005018839.4
NEDD4	NEDD4	NC_040057.1	1760415	1762420	peak_11724	2006	+	PR_intron	rna-XM_027467178.1	NEDD4	NC_040057.1	1716001	1716122	peak_12245	122	+	utr5	rna-XM_027467178.1
PYGO1	PYGO1	NC_040057.1	1887975	1888335	peak_11725	361	+	cds	rna-XM_027466810.1	PYGO1	NC_040057.1	1881012	1885725	peak_12249	4714	+	PR_intron	rna-XM_027466810.1
DNAAF4	DNAAF4	NC_040057.1	1896866	1899239	peak_11727	2374	+	PR_intron	rna-XM_027466807.1	DNAAF4	NC_040057.1	1897711	1899210	peak_12252	1500	+	PR_intron	rna-XM_027466807.1
CCPG1	CCPG1	NC_040057.1	1925843	1926411	peak_11728	569	+	cds	rna-XM_027467032.1	CCPG1	NC_040057.1	1925814	1926411	peak_12253	598	+	cds	rna-XM_027467032.1
UPF2	UPF2	NC_040046.1	196687917	196688472	peak_1173	556	+	PR_intron	rna-XM_027460618.1	UPF2	NC_040046.1	196687857	196688532	peak_1250	676	+	PR_intron	rna-XM_027460618.1
RSL24D1	RSL24D1	NC_040057.1	1985470	1988320	peak_11730	2851	+	PR_intron	rna-XM_027467037.1	RSL24D1	NC_040057.1	1985470	1988320	peak_12256	2851	+	PR_intron	rna-XM_027467037.1
FAM214A	FAM214A	NC_040057.1	2751490	2751671	peak_11731	182	+	utr5	rna-XM_027467086.1	FAM214A	NC_040057.1	2751490	2751760	peak_12257	271	+	utr5	rna-XM_027467086.1
ARPP19	ARPP19	NC_040057.1	2797016	2801504	peak_11735	4489	+	PR_intron	rna-XM_027467096.1	ARPP19	NC_040057.1	2797016	2801504	peak_12261	4489	+	PR_intron	rna-XM_027467096.1
MYO5A	MYO5A	NC_040057.1	2812075	2831245	peak_11736	19171	+	PR_intron	rna-XM_027467074.1	MYO5A	NC_040057.1	2811759	2812166	peak_12262	408	+	PR_intron	rna-XM_027467074.1
MYO5C	MYO5C	NC_040057.1	2933196	2934155	peak_11741	960	+	PR_intron	rna-XM_027467081.1	MYO5C	NC_040057.1	2939675	2939956	peak_12266	282	+	PR_intron	rna-XM_027467081.1
BCL2L10	BCL2L10	NC_040057.1	2982137	2982434	peak_11742	298	+	utr3	rna-XM_027467094.1	BCL2L10	NC_040057.1	2982137	2982611	peak_12267	475	+	utr3	rna-XM_027467094.1
LOC101792346	LOC101792346	NC_040057.1	3154044	3154104	peak_11743	61	+	PR_intron	rna-XM_027466926.1	LOC101792346	NC_040057.1	3176836	3181124	peak_12268	4289	+	PR_intron	rna-XM_027466927.1
LYSMD2	LYSMD2	NC_040057.1	3210056	3213681	peak_11744	3626	+	PR_intron	rna-XM_027467223.1	LYSMD2	NC_040057.1	3210056	3218624	peak_12269	8569	+	PR_intron	rna-XM_027467223.1
SLC30A4	SLC30A4	NC_040057.1	3331141	3331350	peak_11746	210	+	cds	rna-XM_027467045.1	SLC30A4	NC_040057.1	3331111	3331350	peak_12271	240	+	cds	rna-XM_027467045.1
COPS2	COPS2	NC_040057.1	3651009	3651158	peak_11749	150	+	utr3	rna-XM_027467175.1	COPS2	NC_040057.1	3651009	3651128	peak_12273	120	+	cds	rna-XM_027467175.1
SECISBP2L	SECISBP2L	NC_040057.1	3673096	3673638	peak_11750	543	+	PR_intron	rna-XM_027467174.1	SECISBP2L	NC_040057.1	3682707	3683366	peak_12274	660	+	cds	rna-XM_027467174.1
SHC4	SHC4	NC_040057.1	3694516	3694637	peak_11752	122	+	cds	rna-XM_005019493.4	SHC4	NC_040057.1	3694576	3694637	peak_12275	62	+	cds	rna-XM_005019493.4
CEP152	CEP152	NC_040057.1	3744141	3746276	peak_11753	2136	+	PR_intron	rna-XM_027466922.1	CEP152	NC_040057.1	3744081	3748015	peak_12277	3935	+	PR_intron	rna-XM_027466922.1
FBN1	FBN1	NC_040057.1	3771193	3784794	peak_11755	13602	+	PR_intron	rna-XM_027466791.1	FBN1	NC_040057.1	3771193	3771835	peak_12279	643	+	utr5	rna-XM_027466791.1
MYEF2	MYEF2	NC_040057.1	4046042	4052740	peak_11757	6699	+	PR_intron	rna-XM_027466891.1	MYEF2	NC_040057.1	4045863	4052680	peak_12282	6818	+	PR_intron	rna-XM_027466891.1
FOXC2	FOXC2	NC_040057.1	5460861	5460921	peak_11759	61	+	cds	rna-XM_027467027.1	FOXC2	NC_040057.1	5461515	5461605	peak_12286	91	+	cds	rna-XM_027467027.1
ZDHHC7	ZDHHC7	NC_040057.1	5834889	5835217	peak_11765	329	+	utr3	rna-XM_021270235.2	ZDHHC7	NC_040057.1	5834889	5835247	peak_12289	359	+	utr3	rna-XM_021270235.2
COTL1	COTL1	NC_040057.1	6051286	6061295	peak_11766	10010	+	PR_intron	rna-XM_027466911.1	COTL1	NC_040057.1	6041402	6041462	peak_12291	61	+	utr5	rna-XM_027466911.1
HSBP1	HSBP1	NC_040057.1	6292218	6293080	peak_11767	863	+	PR_intron	rna-XM_027466977.1	HSBP1	NC_040057.1	6292218	6293080	peak_12293	863	+	PR_intron	rna-XM_027466977.1
MLYCD	MLYCD	NC_040057.1	6388092	6388390	peak_11768	299	+	cds	rna-XM_013100193.3	MLYCD	NC_040057.1	6388181	6388360	peak_12294	180	+	cds	rna-XM_013100193.3
MPHOSPH6	MPHOSPH6	NC_040057.1	7187595	7194607	peak_11769	7013	+	PR_intron	rna-XM_027466847.1	MPHOSPH6	NC_040057.1	7191173	7194578	peak_12295	3406	+	PR_intron	rna-XM_027466847.1
SDR42E1	SDR42E1	NC_040057.1	7276413	7276801	peak_11770	389	+	cds	rna-XM_027466766.1	SDR42E1	NC_040057.1	7275201	7275610	peak_12296	410	+	PR_intron	rna-XM_027466766.1
01eb529f-2c4f-406e-910d-96b085d390f9	01eb529f-2c4f-406e-910d-96b085d390f9	NC_040057.1	8414532	8415099	peak_11773	568	+	NP_exon	01eb529f-2c4f-406e-910d-96b085d390f9.trans	01eb529f-2c4f-406e-910d-96b085d390f9	NC_040057.1	8414502	8415099	peak_12298	598	+	NP_exon	01eb529f-2c4f-406e-910d-96b085d390f9.trans
LOC101800496	LOC101800496	NC_040057.1	8473885	8474305	peak_11777	421	+	NP_exon	rna-XR_003500050.1	LOC101800496	NC_040057.1	8473915	8474126	peak_12302	212	+	NP_exon	rna-XR_003500050.1
ADAMTS18	ADAMTS18	NC_040057.1	9321108	9323603	peak_11778	2496	+	PR_intron	rna-XM_027466930.1	ADAMTS18	NC_040057.1	9395857	9396098	peak_12303	242	+	NP_exon	rna-XR_003500079.1
CDH5	CDH5	NC_040057.1	11877976	11880427	peak_11779	2452	+	PR_intron	rna-XM_005019998.4	CDH5	NC_040057.1	11877946	11880457	peak_12304	2512	+	PR_intron	rna-XM_005019998.4
BEAN1	BEAN1	NC_040057.1	11949152	11960691	peak_11781	11540	+	PR_intron	rna-XM_027466754.1	BEAN1	NC_040057.1	11949122	11960750	peak_12306	11629	+	PR_intron	rna-XM_027466754.1
LOC101798867	LOC101798867	NC_040057.1	11966789	11969025	peak_11782	2237	+	PR_intron	rna-XM_027466753.1	LOC101798867	NC_040057.1	11966789	11969384	peak_12307	2596	+	PR_intron	rna-XM_027466753.1
PDP2	PDP2	NC_040057.1	12147589	12147740	peak_11786	152	+	cds	rna-XM_027466945.1	PDP2	NC_040057.1	12146867	12147769	peak_12312	903	+	PR_intron	rna-XM_027466945.1
PDCD2L	PDCD2L	NC_040057.1	12290483	12291306	peak_11788	824	+	PR_intron	rna-XM_027466955.1	PDCD2L	NC_040057.1	12291215	12291276	peak_12316	62	+	cds	rna-XM_027466955.1
UBA2	UBA2	NC_040057.1	12310484	12310724	peak_11789	241	+	cds	rna-XM_027466952.1	UBA2	NC_040057.1	12309476	12310754	peak_12317	1279	+	PR_intron	rna-XM_027466952.1
WTIP	WTIP	NC_040057.1	12396427	12396518	peak_11790	92	+	utr3	rna-XM_027466950.1	WTIP	NC_040057.1	12320084	12320205	peak_12318	122	+	cds	rna-XM_027466950.1
KIAA0355	KIAA0355	NC_040057.1	12492600	12510158	peak_11791	17559	+	PR_intron	rna-XM_027466947.1	KIAA0355	NC_040057.1	12519950	12520041	peak_12321	92	+	utr5	rna-XM_027466947.1
LOC101804819	LOC101804819	NC_040057.1	12635219	12643876	peak_11795	8658	+	PR_intron	rna-XM_027466963.1	LOC101804819	NC_040057.1	12573349	12573529	peak_12325	181	+	cds	rna-XM_027466963.1
PEPD	PEPD	NC_040057.1	13024837	13029991	peak_11796	5155	+	PR_intron	rna-XM_027466969.1	PEPD	NC_040057.1	13024837	13030021	peak_12327	5185	+	PR_intron	rna-XM_027466969.1
CEBPA	CEBPA	NC_040057.1	13185615	13186865	peak_11798	1251	+	cds	rna-XM_027466972.1	CEBPA	NC_040057.1	13185615	13187460	peak_12328	1846	+	cds	rna-XM_027466972.1
FUT4	FUT4	NC_040046.1	10529018	10529437	peak_118	420	+	cds	rna-XM_013093285.3	FUT4	NC_040046.1	10528988	10529467	peak_119	480	+	cds	rna-XM_013093285.3
CEP89	CEP89	NC_040057.1	13549479	13550485	peak_11800	1007	+	PR_intron	rna-XM_027467184.1	CEP89	NC_040057.1	13549479	13550485	peak_12329	1007	+	PR_intron	rna-XM_027467184.1
PDCD5	PDCD5	NC_040057.1	13696480	13696750	peak_11804	271	+	PR_intron	rna-XM_027466825.1	PDCD5	NC_040057.1	13696480	13696570	peak_12332	91	+	PR_intron	rna-XM_027466825.1
LOC101794490	LOC101794490	NC_040057.1	13707251	13707671	peak_11805	421	+	NP_exon	gene-LOC101794490.trans	LOC101794490	NC_040057.1	13707251	13707731	peak_12334	481	+	NP_exon	gene-LOC101794490.trans
TSHZ3	TSHZ3	NC_040057.1	14370701	14370762	peak_11808	62	+	cds	rna-XM_027466899.1	TSHZ3	NC_040057.1	14371031	14371391	peak_12338	361	+	cds	rna-XM_027466899.1
USP6NL	USP6NL	NC_040046.1	196829209	196829892	peak_1181	684	+	PR_intron	rna-XM_027460736.1	USP6NL	NC_040046.1	196829209	196829862	peak_1256	654	+	PR_intron	rna-XM_027460736.1
C12H19orf12	C12H19orf12	NC_040057.1	15265062	15266923	peak_11810	1862	+	PR_intron	rna-XM_005020254.4	C12H19orf12	NC_040057.1	15266685	15266923	peak_12340	239	+	cds	rna-XM_005020254.4
ORC6	ORC6	NC_040057.1	15973344	15973895	peak_11811	552	+	PR_intron	rna-XM_027467001.1	ORC6	NC_040057.1	15972325	15973895	peak_12341	1571	+	PR_intron	rna-XM_027467001.1
GPT2	GPT2	NC_040057.1	16058424	16058574	peak_11813	151	+	utr3	rna-XM_027467214.1	GPT2	NC_040057.1	16058274	16058634	peak_12343	361	+	utr3	rna-XM_027467214.1
LONP2	LONP2	NC_040057.1	16419520	16421392	peak_11815	1873	+	PR_intron	rna-XM_027467003.1	LONP2	NC_040057.1	16419580	16421392	peak_12344	1813	+	PR_intron	rna-XM_027467003.1
HEATR3	HEATR3	NC_040057.1	17188401	17189853	peak_11817	1453	+	PR_intron	rna-XM_027467208.1	HEATR3	NC_040057.1	17188401	17189853	peak_12345	1453	+	PR_intron	rna-XM_027467208.1
TENT4B	TENT4B	NC_040057.1	17212475	17212685	peak_11818	211	+	utr5	rna-XM_027467206.1	TENT4B	NC_040057.1	17212475	17212715	peak_12346	241	+	utr5	rna-XM_027467206.1
ADCY7	ADCY7	NC_040057.1	17295074	17295224	peak_11822	151	+	utr5	rna-XM_005021583.4	ADCY7	NC_040057.1	17263832	17266928	peak_12349	3097	+	PR_intron	rna-XM_027467200.1
NKD1	NKD1	NC_040057.1	17514614	17514884	peak_11823	271	+	utr5	rna-XM_005021581.4	NKD1	NC_040057.1	17514644	17514855	peak_12352	212	+	utr5	rna-XM_005021581.4
CYLD	CYLD	NC_040057.1	17697609	17697759	peak_11826	151	+	cds	rna-XM_027467203.1	CYLD	NC_040057.1	17697549	17697759	peak_12357	211	+	cds	rna-XM_027467203.1
CHD9	CHD9	NC_040057.1	18905376	18905557	peak_11830	182	+	cds	rna-XM_027467012.1	CHD9	NC_040057.1	18881586	18881707	peak_12362	122	+	cds	rna-XM_027467006.1
FTO	FTO	NC_040057.1	19117515	19165214	peak_11838	47700	+	PR_intron	rna-XM_027467172.1	FTO	NC_040057.1	19117515	19165214	peak_12370	47700	+	PR_intron	rna-XM_027467172.1
IRX5	IRX5	NC_040057.1	19876923	19877074	peak_11839	152	+	cds	rna-XM_027466917.1	IRX5	NC_040057.1	19874233	19874414	peak_12371	182	+	utr5	rna-XM_027466917.1
MMP2	MMP2	NC_040057.1	20347904	20347995	peak_11840	92	+	utr5	rna-XM_027467059.1	MMP2	NC_040057.1	20347904	20348114	peak_12374	211	+	utr5	rna-XM_027467059.1
NFATC3	NFATC3	NC_040057.1	20764002	20764213	peak_11842	212	+	cds	rna-XM_027467153.1	NFATC3	NC_040057.1	20764002	20764183	peak_12379	182	+	cds	rna-XM_027467153.1
PLA2G15	PLA2G15	NC_040057.1	20944083	20946797	peak_11846	2715	+	PR_intron	rna-XM_027466866.1	PLA2G15	NC_040057.1	20950159	20950490	peak_12383	332	+	cds	rna-XM_027466866.1
SLC7A6OS	SLC7A6OS	NC_040057.1	21159197	21161196	peak_11850	2000	+	PR_intron	rna-XM_027466868.1	SLC7A6OS	NC_040057.1	21159167	21161256	peak_12384	2090	+	PR_intron	rna-XM_027466868.1
LARP6	LARP6	NC_040057.1	32591	32831	peak_11852	241	-	cds	rna-XM_021276272.2	LARP6	NC_040057.1	32681	32861	peak_12386	181	-	cds	rna-XM_021276272.2
CCNB2	CCNB2	NC_040057.1	671747	672401	peak_11853	655	-	PR_intron	rna-XM_027467130.1	CCNB2	NC_040057.1	676239	677407	peak_12391	1169	-	PR_intron	rna-XM_027467130.1
RNF111	RNF111	NC_040057.1	681398	684910	peak_11855	3513	-	PR_intron	rna-XM_027467102.1	RNF111	NC_040057.1	682137	684910	peak_12392	2774	-	PR_intron	rna-XM_027467102.1
MINDY2	MINDY2	NC_040057.1	766720	769917	peak_11857	3198	-	PR_intron	rna-XM_027467125.1	MINDY2	NC_040057.1	766630	769947	peak_12395	3318	-	PR_intron	rna-XM_027467125.1
AQP9	AQP9	NC_040057.1	972068	972309	peak_11859	242	-	utr5	rna-XM_027466902.1	AQP9	NC_040057.1	972128	972279	peak_12397	152	-	utr5	rna-XM_027466901.1
KIN	KIN	NC_040046.1	198731314	198740148	peak_1186	8835	+	PR_intron	rna-XM_027460822.1	KIN	NC_040046.1	198731314	198740118	peak_1261	8805	+	PR_intron	rna-XM_027460822.1
LOC101801563	LOC101801563	NC_040057.1	1122616	1123876	peak_11860	1261	-	PR_intron	rna-XM_027466802.1	LOC101801563	NC_040057.1	1122616	1123906	peak_12398	1291	-	PR_intron	rna-XM_027466802.1
CGNL1	CGNL1	NC_040057.1	1196145	1197107	peak_11863	963	-	PR_intron	rna-XM_013092422.3	CGNL1	NC_040057.1	1196145	1231298	peak_12403	35154	-	PR_intron	rna-XM_021267097.2
TCF12	TCF12	NC_040057.1	1286655	1286716	peak_11865	62	-	utr3	rna-XM_005011930.4	TCF12	NC_040057.1	1286625	1293842	peak_12405	7218	-	PR_intron	rna-XM_005011930.4
TEX9	TEX9	NC_040057.1	1599735	1603052	peak_11867	3318	-	PR_intron	rna-XM_027467149.1	TEX9	NC_040057.1	1600191	1605505	peak_12406	5315	-	PR_intron	rna-XM_027467149.1
MAPK6	MAPK6	NC_040057.1	3017240	3017748	peak_11868	509	-	cds	rna-XM_027467089.1	MAPK6	NC_040057.1	3017240	3017689	peak_12409	450	-	cds	rna-XM_027467089.1
ITIH5	ITIH5	NC_040046.1	198824376	198824676	peak_1187	301	+	cds	rna-XM_027460861.1	ITIH5	NC_040046.1	198824466	198824676	peak_1262	211	+	cds	rna-XM_027460861.1
LEO1	LEO1	NC_040057.1	3109923	3113953	peak_11871	4031	-	PR_intron	rna-XM_027466910.1	LEO1	NC_040057.1	3109893	3114012	peak_12412	4120	-	PR_intron	rna-XM_027466910.1
LOC101792155	LOC101792155	NC_040057.1	3123684	3123864	peak_11873	181	-	utr3	rna-XM_027466857.1	LOC101792155	NC_040057.1	3124667	3124847	peak_12414	181	-	utr3	rna-XM_027466857.1
SCG3	SCG3	NC_040057.1	3229673	3231699	peak_11876	2027	-	PR_intron	rna-XM_027467220.1	SCG3	NC_040057.1	3229673	3244219	peak_12416	14547	-	PR_intron	rna-XM_027467220.1
BLOC1S6	BLOC1S6	NC_040057.1	3321803	3322742	peak_11877	940	-	PR_intron	rna-XM_027467049.1	BLOC1S6	NC_040057.1	3321803	3322772	peak_12420	970	-	PR_intron	rna-XM_027467049.1
SPATA5L1	SPATA5L1	NC_040057.1	3368280	3368519	peak_11879	240	-	cds	rna-XM_013099450.3	SPATA5L1	NC_040057.1	3368191	3368578	peak_12422	388	-	cds	rna-XM_013099450.3
FGF7	FGF7	NC_040057.1	3509876	3537531	peak_11880	27656	-	PR_intron	rna-XM_005019482.3	FGF7	NC_040057.1	3509905	3537531	peak_12423	27627	-	PR_intron	rna-XM_005019482.3
GALK2	GALK2	NC_040057.1	3575776	3576075	peak_11882	300	-	utr3	rna-XM_027466749.1	GALK2	NC_040057.1	3575776	3576075	peak_12424	300	-	utr3	rna-XM_027466749.1
SEMA6D	SEMA6D	NC_040057.1	4207588	4208968	peak_11883	1381	-	cds	rna-XM_027466879.1	SEMA6D	NC_040057.1	4206389	4206540	peak_12425	152	-	utr3	rna-XM_027466879.1
CRISPLD2	CRISPLD2	NC_040057.1	5929095	5929575	peak_11887	481	-	utr3	rna-XM_005016536.4	CRISPLD2	NC_040057.1	5929095	5929784	peak_12431	690	-	utr3	rna-XM_005016536.4
USP10	USP10	NC_040057.1	5988528	5988918	peak_11888	391	-	cds	rna-XM_027466801.1	USP10	NC_040057.1	5988528	5988918	peak_12432	391	-	cds	rna-XM_027466801.1
KLHL36	KLHL36	NC_040057.1	6021924	6022045	peak_11889	122	-	utr3	rna-XM_027466869.1	KLHL36	NC_040057.1	6021954	6022045	peak_12433	92	-	utr3	rna-XM_027466869.1
EXOC4	EXOC4	NC_040046.1	200871378	200888549	peak_1189	17172	+	PR_intron	rna-XM_027461261.1	EXOC4	NC_040046.1	200871378	200888549	peak_1268	17172	+	PR_intron	rna-XM_027461261.1
12ede1c3-1dff-4fb2-b589-df4112c0fb14	12ede1c3-1dff-4fb2-b589-df4112c0fb14	NC_040057.1	6022282	6022851	peak_11890	570	-	NP_exon	12ede1c3-1dff-4fb2-b589-df4112c0fb14.trans	12ede1c3-1dff-4fb2-b589-df4112c0fb14	NC_040057.1	6022282	6022791	peak_12434	510	-	NP_exon	12ede1c3-1dff-4fb2-b589-df4112c0fb14.trans
CDH13	CDH13	NC_040057.1	6553920	6554129	peak_11894	210	-	utr3	rna-XM_005020165.4	CDH13	NC_040057.1	6553920	6554099	peak_12438	180	-	utr3	rna-XM_005020165.4
LOC101791461	LOC101791461	NC_040057.1	7212339	7212518	peak_11897	180	-	cds	rna-XM_005020161.4	LOC101791461	NC_040057.1	7212279	7212548	peak_12441	270	-	cds	rna-XM_005020161.4
PLCG2	PLCG2	NC_040057.1	7339130	7339341	peak_11899	212	-	cds	rna-XM_027467181.1	PLCG2	NC_040057.1	7284309	7284400	peak_12442	92	-	cds	rna-XM_027467181.1
AMOTL1	AMOTL1	NC_040046.1	10594694	10594815	peak_119	122	+	cds	rna-XM_027467614.1	AMOTL1	NC_040046.1	10594602	10594965	peak_121	364	+	cds	rna-XM_027467614.1
CMIP	CMIP	NC_040057.1	7374690	7377416	peak_11900	2727	-	PR_intron	rna-XM_005018269.3	CMIP	NC_040057.1	7374749	7375079	peak_12443	331	-	utr3	rna-XM_005018269.3
BCO1	BCO1	NC_040057.1	7569228	7569289	peak_11902	62	-	utr3	rna-XM_005018267.4	BCO1	NC_040057.1	7583578	7583699	peak_12444	122	-	cds	rna-XM_005018267.4
ATMIN	ATMIN	NC_040057.1	7671328	7671568	peak_11905	241	-	NP_exon	rna-XR_003499978.1	ATMIN	NC_040057.1	7671298	7671837	peak_12446	540	-	NP_exon	rna-XR_003499978.1
CDYL2	CDYL2	NC_040057.1	7766350	7799933	peak_11906	33584	-	PR_intron	rna-XM_027466858.1	CDYL2	NC_040057.1	7757971	7799963	peak_12448	41993	-	PR_intron	rna-XM_027466858.1
WWOX	WWOX	NC_040057.1	8592408	8592529	peak_11908	122	-	utr3	rna-XM_005018259.4	WWOX	NC_040057.1	9094150	9098179	peak_12449	4030	-	PR_intron	rna-XM_013098287.3
LRGUK	LRGUK	NC_040046.1	201244885	201245096	peak_1191	212	+	NP_exon	rna-XR_003498323.1	LRGUK	NC_040046.1	201245005	201245066	peak_1269	62	+	cds	rna-XM_027461317.1
VAT1L	VAT1L	NC_040057.1	9133853	9133944	peak_11910	92	-	utr3	rna-XM_027466943.1	VAT1L	NC_040057.1	9133823	9159546	peak_12450	25724	-	PR_intron	rna-XM_027466943.1
CDH11	CDH11	NC_040057.1	11156116	11156537	peak_11912	422	-	cds	rna-XM_027466798.1	CDH11	NC_040057.1	11156116	11156537	peak_12454	422	-	cds	rna-XM_027466798.1
CMTM4	CMTM4	NC_040057.1	12020308	12020458	peak_11913	151	-	NP_intron	rna-XR_003499959.1	CMTM4	NC_040057.1	12020967	12021297	peak_12457	331	-	NP_intron	rna-XR_003499959.1
DYNC1LI2	DYNC1LI2	NC_040057.1	12064275	12064516	peak_11915	242	-	utr3	rna-XM_027466831.1	DYNC1LI2	NC_040057.1	12064305	12064546	peak_12458	242	-	utr3	rna-XM_027466831.1
RRAD	RRAD	NC_040057.1	12238960	12239230	peak_11917	271	-	utr3	rna-XM_027466956.1	RRAD	NC_040057.1	12239079	12239290	peak_12459	212	-	utr3	rna-XM_027466956.1
LSM14A	LSM14A	NC_040057.1	12551213	12555356	peak_11919	4144	-	PR_intron	rna-NM_001310414.2	LSM14A	NC_040057.1	12551243	12555326	peak_12461	4084	-	PR_intron	rna-NM_001310414.2
LOC101790071	LOC101790071	NC_040046.1	201385001	201386196	peak_1192	1196	+	PR_intron	rna-XM_027461372.1	LOC101790071	NC_040046.1	201378697	201388160	peak_1270	9464	+	PR_intron	rna-XM_027461372.1
KCTD15	KCTD15	NC_040057.1	12717804	12718433	peak_11921	630	-	utr3	rna-XM_027466961.1	KCTD15	NC_040057.1	12717714	12718791	peak_12463	1078	-	utr3	rna-XM_027466961.1
CEBPG	CEBPG	NC_040057.1	13162704	13163183	peak_11925	480	-	cds	rna-XM_005019973.4	CEBPG	NC_040057.1	13162704	13163243	peak_12467	540	-	cds	rna-XM_005019973.4
LRP3	LRP3	NC_040057.1	13425850	13426391	peak_11926	542	-	cds	rna-XM_005019971.4	LRP3	NC_040057.1	13425790	13426391	peak_12468	602	-	cds	rna-XM_005019971.4
GPATCH1	GPATCH1	NC_040057.1	13488045	13489190	peak_11929	1146	-	PR_intron	rna-XM_027467054.1	GPATCH1	NC_040057.1	13488045	13489190	peak_12470	1146	-	PR_intron	rna-XM_027467054.1
RGS9BP	RGS9BP	NC_040057.1	13653927	13654227	peak_11930	301	-	utr3	rna-XM_005020244.3	RGS9BP	NC_040057.1	13653957	13654286	peak_12472	330	-	utr3	rna-XM_005020244.3
ZNF507	ZNF507	NC_040057.1	13825029	13825179	peak_11933	151	-	cds	rna-XM_013100265.3	ZNF507	NC_040057.1	13811922	13812102	peak_12476	181	-	cds	rna-XM_013100265.3
URI1	URI1	NC_040057.1	15117122	15117303	peak_11934	182	-	cds	rna-XM_027466800.1	URI1	NC_040057.1	15117092	15117303	peak_12480	212	-	cds	rna-XM_027466800.1
CCNE1	CCNE1	NC_040057.1	15203783	15203904	peak_11937	122	-	cds	rna-XM_027466980.1	CCNE1	NC_040057.1	15203604	15203814	peak_12483	211	-	utr3	rna-XM_027466980.1
PLEKHF1	PLEKHF1	NC_040057.1	15286615	15286736	peak_11938	122	-	utr3	rna-XM_021272923.2	PLEKHF1	NC_040057.1	15286615	15286676	peak_12484	62	-	utr3	rna-XM_021272923.2
NET1	NET1	NC_040046.1	201508278	201512273	peak_1194	3996	+	PR_intron	rna-XM_027461402.1	NET1	NC_040046.1	201508278	201508339	peak_1276	62	+	PR_intron	rna-XM_027461402.1
VSTM2B	VSTM2B	NC_040057.1	15334630	15334868	peak_11940	239	-	utr3	rna-XM_027466984.1	VSTM2B	NC_040057.1	15334630	15350406	peak_12488	15777	-	PR_intron	rna-XM_027466984.1
SHCBP1	SHCBP1	NC_040057.1	15895642	15895913	peak_11941	272	-	cds	rna-XM_027466999.1	SHCBP1	NC_040057.1	15894144	15894235	peak_12489	92	-	utr3	rna-XM_027466999.1
VPS35	VPS35	NC_040057.1	15948253	15949214	peak_11944	962	-	PR_intron	rna-XM_027466832.1	VPS35	NC_040057.1	15948253	15949274	peak_12492	1022	-	PR_intron	rna-XM_027466832.1
C12H16orf87	C12H16orf87	NC_040057.1	16022513	16024557	peak_11946	2045	-	PR_intron	rna-XM_027467213.1	C12H16orf87	NC_040057.1	16016544	16028455	peak_12495	11912	-	PR_intron	rna-XM_027467213.1
DNAJA2	DNAJA2	NC_040057.1	16078969	16082018	peak_11947	3050	-	PR_intron	rna-XM_027466925.1	DNAJA2	NC_040057.1	16078939	16082018	peak_12496	3080	-	PR_intron	rna-XM_027466925.1
NETO2	NETO2	NC_040057.1	16120006	16120307	peak_11948	302	-	cds	rna-XM_027466994.1	NETO2	NC_040057.1	16120036	16120517	peak_12497	482	-	cds	rna-XM_027466994.1
SIAH1	SIAH1	NC_040057.1	16459903	16460410	peak_11949	508	-	cds	rna-XM_013103858.3	SIAH1	NC_040057.1	16459992	16460112	peak_12498	121	-	cds	rna-XM_013103858.3
N4BP1	N4BP1	NC_040057.1	16535815	16536055	peak_11951	241	-	cds	rna-XM_027467002.1	N4BP1	NC_040057.1	16535815	16536085	peak_12501	271	-	cds	rna-XM_027467002.1
ZNF423	ZNF423	NC_040057.1	17016756	17023579	peak_11954	6824	-	PR_intron	rna-XM_027467195.1	ZNF423	NC_040057.1	17016756	17023549	peak_12505	6794	-	PR_intron	rna-XM_027467195.1
BRD7	BRD7	NC_040057.1	17336690	17338876	peak_11959	2187	-	PR_intron	rna-XM_027467205.1	BRD7	NC_040057.1	17337390	17338876	peak_12509	1487	-	PR_intron	rna-XM_027467205.1
TOX3	TOX3	NC_040057.1	18593734	18593854	peak_11962	121	-	cds	rna-XM_027466976.1	TOX3	NC_040057.1	18593345	18593585	peak_12511	241	-	cds	rna-XM_027466976.1
AKTIP	AKTIP	NC_040057.1	18988686	18991122	peak_11963	2437	-	PR_intron	rna-XM_027467018.1	AKTIP	NC_040057.1	18988656	18990696	peak_12512	2041	-	PR_intron	rna-XM_027467018.1
SLC12A4	SLC12A4	NC_040057.1	20588711	20589863	peak_11968	1153	-	PR_intron	rna-XM_027467022.1	SLC12A4	NC_040057.1	20588711	20589893	peak_12518	1183	-	PR_intron	rna-XM_027467022.1
LOC101805317	LOC101805317	NC_040046.1	201524038	201524099	peak_1197	62	+	cds	rna-XM_027461432.1	LOC101805317	NC_040046.1	201523710	201523800	peak_1279	91	+	cds	rna-XM_027461432.1
DDX28	DDX28	NC_040057.1	20696103	20696463	peak_11970	361	-	cds	rna-XM_027467023.1	DDX28	NC_040057.1	20696133	20696523	peak_12519	391	-	cds	rna-XM_027467023.1
SLC7A6	SLC7A6	NC_040057.1	21166400	21167798	peak_11973	1399	-	PR_intron	rna-XM_027466864.1	SLC7A6	NC_040057.1	21166489	21167798	peak_12524	1310	-	PR_intron	rna-XM_027466864.1
LOC101797616	LOC101797616	NC_040057.1	21210038	21210518	peak_11976	481	-	utr3	rna-XM_005025722.4	LOC101797616	NC_040057.1	21210308	21210518	peak_12527	211	-	cds	rna-XM_005025722.4
FGD5	FGD5	NC_040058.1	36654	37582	peak_11977	929	+	cds	rna-XM_027467798.1	FGD5	NC_040058.1	36893	37642	peak_12528	750	+	cds	rna-XM_027467798.1
FAM208B	FAM208B	NC_040046.1	201546392	201553204	peak_1198	6813	+	PR_intron	rna-XM_027455717.1	FAM208B	NC_040046.1	201567213	201567423	peak_1280	211	+	cds	rna-XM_027455717.1
MRPS25	MRPS25	NC_040058.1	178020	178386	peak_11981	367	+	PR_intron	rna-XM_027467815.1	MRPS25	NC_040058.1	178020	178356	peak_12533	337	+	PR_intron	rna-XM_027467815.1
TMCC1	TMCC1	NC_040058.1	257010	257460	peak_11982	451	+	PR_intron	rna-XM_027467809.1	TMCC1	NC_040058.1	257040	257131	peak_12534	92	+	PR_intron	rna-XM_027467809.1
PLXND1	PLXND1	NC_040058.1	386384	388331	peak_11987	1948	+	PR_intron	rna-XM_027467956.1	PLXND1	NC_040058.1	386384	386505	peak_12537	122	+	cds	rna-XM_027467956.1
RPL32	RPL32	NC_040058.1	479250	480235	peak_11990	986	+	PR_intron	rna-XM_027468061.1	RPL32	NC_040058.1	479250	480265	peak_12540	1016	+	PR_intron	rna-XM_027468061.1
0ccacd80-a771-46c1-ba0a-e8f6a6f39868	0ccacd80-a771-46c1-ba0a-e8f6a6f39868	NC_040058.1	502399	502607	peak_11992	209	+	NP_exon	0ccacd80-a771-46c1-ba0a-e8f6a6f39868.trans	0ccacd80-a771-46c1-ba0a-e8f6a6f39868	NC_040058.1	502399	502607	peak_12542	209	+	NP_exon	0ccacd80-a771-46c1-ba0a-e8f6a6f39868.trans
SRGAP3	SRGAP3	NC_040058.1	550644	550764	peak_11994	121	+	utr5	rna-XM_027467399.1	SRGAP3	NC_040058.1	550614	550705	peak_12544	92	+	utr5	rna-XM_027467398.1
RAD18	RAD18	NC_040058.1	685411	685502	peak_11996	92	+	cds	rna-XM_027467607.1	RAD18	NC_040058.1	673574	673754	peak_12546	181	+	cds	rna-XM_027467607.1
SUMF1	SUMF1	NC_040058.1	1853330	1853571	peak_12000	242	+	utr3	rna-XM_027467552.1	SUMF1	NC_040058.1	1853330	1853571	peak_12549	242	+	utr3	rna-XM_027467552.1
CRBN	CRBN	NC_040058.1	2126121	2129345	peak_12003	3225	+	PR_intron	rna-XM_027467533.1	CRBN	NC_040058.1	2126121	2129345	peak_12551	3225	+	PR_intron	rna-XM_027467533.1
PDZRN3	PDZRN3	NC_040058.1	3820418	3824514	peak_12004	4097	+	PR_intron	rna-XM_027467387.1	PDZRN3	NC_040058.1	3821296	3824723	peak_12552	3428	+	PR_intron	rna-XM_027467387.1
SHQ1	SHQ1	NC_040058.1	3957935	3959265	peak_12007	1331	+	PR_intron	rna-XM_027467618.1	SHQ1	NC_040058.1	3957935	3959295	peak_12554	1361	+	PR_intron	rna-XM_027467618.1
RYBP	RYBP	NC_040058.1	4078542	4082928	peak_12009	4387	+	PR_intron	rna-XM_027467593.1	RYBP	NC_040058.1	4043449	4043629	peak_12556	181	+	utr5	rna-XM_027467593.1
FOXP1	FOXP1	NC_040058.1	4533077	4567485	peak_12012	34409	+	PR_intron	rna-XM_021266699.2	FOXP1	NC_040058.1	4533403	4567455	peak_12558	34053	+	PR_intron	rna-XM_021266699.2
FRMD4B	FRMD4B	NC_040058.1	5245397	5246531	peak_12015	1135	+	PR_intron	rna-XM_027467444.1	FRMD4B	NC_040058.1	5254486	5254696	peak_12561	211	+	cds	rna-XM_027467444.1
LMOD3	LMOD3	NC_040058.1	5267165	5269096	peak_12019	1932	+	PR_intron	rna-XM_027467848.1	LMOD3	NC_040058.1	5267224	5269066	peak_12564	1843	+	PR_intron	rna-XM_027467848.1
UBA3	UBA3	NC_040058.1	5285180	5288248	peak_12022	3069	+	PR_intron	rna-XM_027467828.1	UBA3	NC_040058.1	5285120	5288248	peak_12568	3129	+	PR_intron	rna-XM_027467828.1
TMF1	TMF1	NC_040058.1	5302916	5303306	peak_12023	391	+	cds	rna-XM_027467825.1	TMF1	NC_040058.1	5303006	5303306	peak_12569	301	+	cds	rna-XM_027467825.1
EOGT	EOGT	NC_040058.1	5336614	5336824	peak_12027	211	+	utr3	rna-XM_027467835.1	EOGT	NC_040058.1	5336644	5336824	peak_12573	181	+	utr3	rna-XM_027467835.1
LRIG1	LRIG1	NC_040058.1	6159914	6160094	peak_12028	181	+	cds	rna-XM_027467906.1	LRIG1	NC_040058.1	6240591	6242010	peak_12575	1420	+	PR_intron	rna-XM_027467908.1
MAGI1	MAGI1	NC_040058.1	6411319	6411410	peak_12031	92	+	cds	rna-XM_027467720.1	MAGI1	NC_040058.1	6411319	6451975	peak_12578	40657	+	PR_intron	rna-XM_027467720.1
ADAMTS9	ADAMTS9	NC_040058.1	6964608	6964759	peak_12036	152	+	NP_exon	rna-XR_003500396.1	ADAMTS9	NC_040058.1	6968295	6977541	peak_12583	9247	+	PR_intron	rna-XM_027468023.1
PRICKLE2	PRICKLE2	NC_040058.1	7145606	7145757	peak_12039	152	+	cds	rna-XM_021274939.2	PRICKLE2	NC_040058.1	7145366	7145697	peak_12586	332	+	cds	rna-XM_021274939.2
PSMD6	PSMD6	NC_040058.1	7179338	7179457	peak_12041	120	+	cds	rna-XM_027467749.1	PSMD6	NC_040058.1	7179338	7179487	peak_12589	150	+	cds	rna-XM_027467749.1
CADPS	CADPS	NC_040058.1	7499847	7500027	peak_12042	181	+	cds	rna-XM_027467975.1	CADPS	NC_040058.1	7499578	7500057	peak_12590	480	+	cds	rna-XM_027467975.1
ARIH2	ARIH2	NC_040058.1	9289674	9304971	peak_12045	15298	+	PR_intron	rna-XM_027468044.1	ARIH2	NC_040058.1	9289674	9293297	peak_12592	3624	+	PR_intron	rna-XM_027468041.1
IL17RD	IL17RD	NC_040058.1	9522859	9523009	peak_12049	151	+	cds	rna-XM_027467603.1	IL17RD	NC_040058.1	9522679	9523069	peak_12596	391	+	cds	rna-XM_027467603.1
FBH1	FBH1	NC_040046.1	201607908	201608058	peak_1205	151	+	cds	rna-XM_027455722.1	FBH1	NC_040046.1	201606692	201608058	peak_1285	1367	+	PR_intron	rna-XM_027455722.1
ARHGEF3	ARHGEF3	NC_040058.1	9535643	9535824	peak_12051	182	+	cds	rna-XM_027467582.1	ARHGEF3	NC_040058.1	9535703	9535853	peak_12598	151	+	cds	rna-XM_027467582.1
FAM208A	FAM208A	NC_040058.1	9669387	9673305	peak_12053	3919	+	PR_intron	rna-XM_027467558.1	FAM208A	NC_040058.1	9669357	9673245	peak_12600	3889	+	PR_intron	rna-XM_027467558.1
CCDC66	CCDC66	NC_040058.1	9686693	9686873	peak_12054	181	+	PR_intron	rna-XM_027467572.1	CCDC66	NC_040058.1	9686603	9686873	peak_12601	271	+	PR_intron	rna-XM_027467572.1
ERC2	ERC2	NC_040058.1	9768402	9768552	peak_12058	151	+	PR_intron	rna-XM_027467567.1	ERC2	NC_040058.1	9766221	9766312	peak_12606	92	+	PR_intron	rna-XM_027467567.1
WNT5A	WNT5A	NC_040058.1	10334336	10336678	peak_12059	2343	+	PR_intron	rna-XM_027467591.1	WNT5A	NC_040058.1	10324910	10325001	peak_12608	92	+	utr5	rna-XM_027467590.1
CHDH	CHDH	NC_040058.1	11104347	11104737	peak_12060	391	+	cds	rna-XM_005019063.4	CHDH	NC_040058.1	11099298	11099418	peak_12612	121	+	utr5	rna-XM_027467334.1
DCP1A	DCP1A	NC_040058.1	11377314	11380072	peak_12062	2759	+	PR_intron	rna-XM_027467506.1	DCP1A	NC_040058.1	11377404	11380102	peak_12615	2699	+	PR_intron	rna-XM_027467506.1
BICD2	BICD2	NC_040058.1	11474882	11544556	peak_12063	69675	+	PR_intron	rna-XM_027467851.1	BICD2	NC_040058.1	11474882	11544616	peak_12617	69735	+	PR_intron	rna-XM_027467851.1
FGD3	FGD3	NC_040058.1	11641601	11651088	peak_12068	9488	+	PR_intron	rna-XM_005019075.4	FGD3	NC_040058.1	11641571	11651088	peak_12622	9518	+	PR_intron	rna-XM_005019075.4
SUSD3	SUSD3	NC_040058.1	11762725	11762963	peak_12070	239	+	cds	rna-XM_027467637.1	SUSD3	NC_040058.1	11762725	11762933	peak_12624	209	+	cds	rna-XM_027467637.1
WNK2	WNK2	NC_040058.1	11867244	11908291	peak_12071	41048	+	PR_intron	rna-XM_027467256.1	WNK2	NC_040058.1	11867184	11908321	peak_12626	41138	+	PR_intron	rna-XM_027467256.1
ZC3HC1	ZC3HC1	NC_040046.1	201752328	201752538	peak_1208	211	+	cds	rna-XM_027461602.1	ZC3HC1	NC_040046.1	201752477	201752538	peak_1290	62	+	cds	rna-XM_027461602.1
FAM120A	FAM120A	NC_040058.1	12020228	12020738	peak_12080	511	+	utr5	rna-XM_027467902.1	FAM120A	NC_040058.1	12020378	12020738	peak_12634	361	+	utr5	rna-XM_027467902.1
PHF2	PHF2	NC_040058.1	12158969	12161623	peak_12083	2655	+	PR_intron	rna-XM_027467391.1	PHF2	NC_040058.1	12157589	12161593	peak_12637	4005	+	PR_intron	rna-XM_027467391.1
IQSEC1	IQSEC1	NC_040058.1	13299166	13299765	peak_12085	600	+	cds	rna-XM_005011369.4	IQSEC1	NC_040058.1	13299076	13299765	peak_12642	690	+	cds	rna-XM_005011369.4
UBE2H	UBE2H	NC_040046.1	201855938	201861669	peak_1209	5732	+	PR_intron	rna-XM_027461640.1	UBE2H	NC_040046.1	201855938	201861699	peak_1291	5762	+	PR_intron	rna-XM_027461640.1
KIAA1257	KIAA1257	NC_040058.1	13366066	13368394	peak_12090	2329	+	NP_intron	rna-XR_001185857.2	KIAA1257	NC_040058.1	13366066	13367629	peak_12645	1564	+	NP_intron	rna-XR_001185857.2
EFCC1	EFCC1	NC_040058.1	13416068	13417829	peak_12091	1762	+	PR_intron	rna-XM_027467550.1	EFCC1	NC_040058.1	13416158	13418008	peak_12646	1851	+	PR_intron	rna-XM_027467550.1
RAB43	RAB43	NC_040058.1	13511543	13511604	peak_12094	62	+	utr5	rna-XM_027467964.1	RAB43	NC_040058.1	13522859	13523129	peak_12648	271	+	cds	rna-XM_027467964.1
RAF1	RAF1	NC_040058.1	13635855	13645214	peak_12097	9360	+	PR_intron	rna-XM_027467853.1	RAF1	NC_040058.1	13635914	13655397	peak_12650	19484	+	PR_intron	rna-XM_027467853.1
VGLL4	VGLL4	NC_040058.1	14289928	14290302	peak_12098	375	+	PR_intron	rna-XM_005013762.4	VGLL4	NC_040058.1	14289987	14290332	peak_12652	346	+	PR_intron	rna-XM_005013762.4
ATRIP	ATRIP	NC_040058.1	15672590	15672710	peak_12099	121	+	cds	rna-XM_027467726.1	ATRIP	NC_040058.1	15672590	15672919	peak_12656	330	+	cds	rna-XM_027467726.1
12500ea8-85ef-4866-b6b9-b0eb94da75f5	12500ea8-85ef-4866-b6b9-b0eb94da75f5	NC_040046.1	10634241	10634692	peak_121	452	+	NP_exon	12500ea8-85ef-4866-b6b9-b0eb94da75f5.trans	12500ea8-85ef-4866-b6b9-b0eb94da75f5	NC_040046.1	10634241	10634692	peak_123	452	+	NP_exon	12500ea8-85ef-4866-b6b9-b0eb94da75f5.trans
RNF123	RNF123	NC_040058.1	15771169	15771919	peak_12100	751	+	PR_intron	rna-XM_027468004.1	RNF123	NC_040058.1	15771169	15771889	peak_12658	721	+	PR_intron	rna-XM_027468004.1
INKA1	INKA1	NC_040058.1	15852582	15853436	peak_12101	855	+	PR_intron	rna-XM_027467942.1	INKA1	NC_040058.1	15852611	15853406	peak_12659	796	+	PR_intron	rna-XM_027467942.1
RBM6	RBM6	NC_040058.1	16042516	16043652	peak_12103	1137	+	cds	rna-XM_027467242.1	RBM6	NC_040058.1	16042486	16043652	peak_12662	1167	+	cds	rna-XM_027467242.1
LOC101805082	LOC101805082	NC_040058.1	16110046	16110285	peak_12108	240	+	utr3	rna-XM_027467243.1	LOC101805082	NC_040058.1	16110135	16110315	peak_12666	181	+	utr3	rna-XM_027467243.1
TEX264	TEX264	NC_040058.1	16423268	16423566	peak_12109	299	+	cds	rna-XM_013100850.3	TEX264	NC_040058.1	16423268	16423566	peak_12667	299	+	cds	rna-XM_013100850.3
DUSP7	DUSP7	NC_040058.1	16556447	16556745	peak_12110	299	+	cds	rna-XM_027467639.1	DUSP7	NC_040058.1	16556417	16556716	peak_12669	300	+	cds	rna-XM_027467639.1
RPL29	RPL29	NC_040058.1	16856036	16857500	peak_12113	1465	+	PR_intron	rna-XM_027467867.1	RPL29	NC_040058.1	16857441	16857500	peak_12672	60	+	utr3	rna-XM_027467867.1
NISCH	NISCH	NC_040058.1	16872646	16872796	peak_12114	151	+	NP_exon	rna-XR_003500194.1	NISCH	NC_040058.1	16894154	16894483	peak_12673	330	+	NP_exon	rna-XR_003500194.1
GNL3	GNL3	NC_040058.1	17057868	17059544	peak_12117	1677	+	PR_intron	rna-XM_027467318.1	GNL3	NC_040058.1	17057838	17059544	peak_12675	1707	+	PR_intron	rna-XM_027467318.1
RASSF1	RASSF1	NC_040058.1	17679069	17679370	peak_12119	302	+	PR_intron	rna-XM_027467436.1	RASSF1	NC_040058.1	17679249	17679430	peak_12677	182	+	PR_intron	rna-XM_027467436.1
HYAL1	HYAL1	NC_040058.1	17696107	17696407	peak_12122	301	+	PR_intron	rna-XM_027467658.1	HYAL1	NC_040058.1	17696227	17696436	peak_12679	210	+	PR_intron	rna-XM_027467658.1
LOC101796407	LOC101796407	NC_040058.1	18035440	18036245	peak_12124	806	+	PR_intron	rna-XM_021279558.2	LOC101796407	NC_040058.1	18035380	18035719	peak_12680	340	+	PR_intron	rna-XM_021279558.2
HEMK1	HEMK1	NC_040058.1	18088455	18088576	peak_12125	122	+	NP_exon	rna-XR_003500268.1	HEMK1	NC_040058.1	18088515	18088725	peak_12681	211	+	NP_exon	rna-XR_003500268.1
MAPKAPK3	MAPKAPK3	NC_040058.1	18168651	18202973	peak_12126	34323	+	PR_intron	rna-XM_005026453.4	MAPKAPK3	NC_040058.1	18168876	18169176	peak_12683	301	+	cds	rna-XM_005026453.4
PARP3	PARP3	NC_040058.1	18551479	18551779	peak_12132	301	+	cds	rna-XM_027467922.1	PARP3	NC_040058.1	18551509	18551749	peak_12686	241	+	cds	rna-XM_027467922.1
BAP1	BAP1	NC_040058.1	18584418	18584849	peak_12134	432	+	PR_intron	rna-XM_027467870.1	BAP1	NC_040058.1	18586276	18587290	peak_12687	1015	+	PR_intron	rna-XM_027467870.1
b1004246-ce95-44d6-bc8e-ab4866a97985	b1004246-ce95-44d6-bc8e-ab4866a97985	NC_040058.1	18589376	18589855	peak_12137	480	+	NP_exon	b1004246-ce95-44d6-bc8e-ab4866a97985.trans	b1004246-ce95-44d6-bc8e-ab4866a97985	NC_040058.1	18590512	18590782	peak_12689	271	+	NP_exon	b1004246-ce95-44d6-bc8e-ab4866a97985.trans
TNPO3	TNPO3	NC_040046.1	202056369	202056549	peak_1214	181	+	utr3	rna-XM_027461847.1	TNPO3	NC_040046.1	202056339	202056699	peak_1294	361	+	utr3	rna-XM_027461847.1
WDR82	WDR82	NC_040058.1	18737285	18737794	peak_12141	510	+	utr3	rna-XM_027467795.1	WDR82	NC_040058.1	18736956	18737794	peak_12692	839	+	utr3	rna-XM_027467795.1
TWF2	TWF2	NC_040058.1	18775438	18775558	peak_12142	121	+	cds	rna-XM_027467790.1	TWF2	NC_040058.1	18777463	18777524	peak_12693	62	+	utr3	rna-XM_027467790.1
PDE12	PDE12	NC_040058.1	18894812	18895112	peak_12144	301	+	cds	rna-XM_027467544.1	PDE12	NC_040058.1	18893370	18893460	peak_12694	91	+	cds	rna-XM_027467544.1
LOC113839633	LOC113839633	NC_040058.1	18947011	18947251	peak_12145	241	+	utr5	rna-XM_027467377.1	LOC113839633	NC_040058.1	18947011	18947251	peak_12696	241	+	utr5	rna-XM_027467377.1
SLMAP	SLMAP	NC_040058.1	18999113	19002796	peak_12146	3684	+	PR_intron	rna-XM_027467371.1	SLMAP	NC_040058.1	19000020	19002796	peak_12697	2777	+	PR_intron	rna-XM_027467371.1
FLNB	FLNB	NC_040058.1	19120978	19121158	peak_12150	181	+	cds	rna-XM_027467363.1	FLNB	NC_040058.1	19064902	19077906	peak_12701	13005	+	PR_intron	rna-XM_027467363.1
IP6K2	IP6K2	NC_040058.1	19213947	19214845	peak_12151	899	+	PR_intron	rna-XM_027467522.1	IP6K2	NC_040058.1	19213947	19214845	peak_12705	899	+	PR_intron	rna-XM_027467522.1
NCKIPSD	NCKIPSD	NC_040058.1	19272015	19272255	peak_12153	241	+	utr3	rna-XM_027467517.1	NCKIPSD	NC_040058.1	19272075	19272195	peak_12707	121	+	utr3	rna-XM_027467517.1
CELSR3	CELSR3	NC_040058.1	19296269	19296510	peak_12154	242	+	cds	rna-XM_027467873.1	CELSR3	NC_040058.1	19276424	19276545	peak_12708	122	+	cds	rna-XM_027467873.1
COL7A1	COL7A1	NC_040058.1	19333065	19333505	peak_12156	441	+	PR_intron	rna-XM_027467874.1	COL7A1	NC_040058.1	19333065	19333848	peak_12711	784	+	PR_intron	rna-XM_027467874.1
LOC101801533	LOC101801533	NC_040058.1	19376656	19376857	peak_12163	202	+	PR_intron	rna-XM_027467653.1	LOC101801533	NC_040058.1	19376656	19376857	peak_12716	202	+	PR_intron	rna-XM_027467653.1
RPN1	RPN1	NC_040058.1	19423532	19423802	peak_12165	271	+	cds	rna-XM_027467876.1	RPN1	NC_040058.1	19423562	19423832	peak_12718	271	+	utr3	rna-XM_027467876.1
GATA2	GATA2	NC_040058.1	19472541	19472841	peak_12168	301	+	utr3	rna-XM_027467602.1	GATA2	NC_040058.1	19462854	19463749	peak_12719	896	+	PR_intron	rna-XM_027467602.1
RUVBL1	RUVBL1	NC_040058.1	19799163	19799342	peak_12171	180	+	cds	rna-XM_027468056.1	RUVBL1	NC_040058.1	19799163	19800005	peak_12722	843	+	PR_intron	rna-XM_027468056.1
MGLL	MGLL	NC_040058.1	19972198	19972258	peak_12173	61	+	utr3	rna-XM_013092331.3	MGLL	NC_040058.1	19972257	19972378	peak_12725	122	+	utr3	rna-XM_013092331.3
TPRA1	TPRA1	NC_040058.1	20081846	20081997	peak_12177	152	+	utr3	rna-XM_013092328.3	TPRA1	NC_040058.1	20081786	20082475	peak_12728	690	+	utr3	rna-XM_013092328.3
PLXNA1	PLXNA1	NC_040058.1	20219883	20231336	peak_12179	11454	+	PR_intron	rna-XM_027468030.1	PLXNA1	NC_040058.1	20219883	20231396	peak_12730	11514	+	PR_intron	rna-XM_027468030.1
CHST13	CHST13	NC_040058.1	20839609	20839728	peak_12184	120	+	cds	rna-XM_021276035.2	CHST13	NC_040058.1	20839815	20839993	peak_12733	179	+	cds	rna-XM_021276035.2
LOC101795858	LOC101795858	NC_040058.1	21153342	21155334	peak_12187	1993	+	PR_intron	rna-XM_005025108.3	LOC101795858	NC_040058.1	21107452	21107543	peak_12735	92	+	utr5	rna-XM_005025108.3
TMEM43	TMEM43	NC_040058.1	21184947	21185186	peak_12188	240	+	utr3	rna-XM_027468000.1	TMEM43	NC_040058.1	21184976	21185246	peak_12737	271	+	utr3	rna-XM_027468000.1
LSM3	LSM3	NC_040058.1	21198669	21200841	peak_12189	2173	+	PR_intron	rna-XM_005025110.4	LSM3	NC_040058.1	21198698	21200841	peak_12738	2144	+	PR_intron	rna-XM_005025110.4
CCDC174	CCDC174	NC_040058.1	21694135	21697291	peak_12190	3157	+	PR_intron	rna-XM_027467485.1	CCDC174	NC_040058.1	21694135	21697320	peak_12739	3186	+	PR_intron	rna-XM_027467485.1
CCDC51	CCDC51	NC_040058.1	21714664	21714989	peak_12192	326	+	PR_intron	rna-XM_027467493.1	CCDC51	NC_040058.1	21714664	21714959	peak_12741	296	+	PR_intron	rna-XM_027467493.1
PLXNB1	PLXNB1	NC_040058.1	21762887	21763008	peak_12195	122	+	cds	rna-XM_027467343.1	PLXNB1	NC_040058.1	21762887	21763098	peak_12745	212	+	cds	rna-XM_027467343.1
SETD5	SETD5	NC_040058.1	21850247	21852942	peak_12197	2696	+	PR_intron	rna-XM_013105503.3	SETD5	NC_040058.1	21840453	21840943	peak_12750	491	+	PR_intron	rna-XM_013105503.3
CALU	CALU	NC_040046.1	202073475	202075915	peak_1220	2441	+	PR_intron	rna-XM_027461876.1	CALU	NC_040046.1	202073475	202075974	peak_1298	2500	+	PR_intron	rna-XM_027461876.1
BRPF1	BRPF1	NC_040058.1	21919049	21919110	peak_12203	62	+	cds	rna-XM_027467357.1	BRPF1	NC_040058.1	21919049	21919230	peak_12754	182	+	cds	rna-XM_027467357.1
RBSN	RBSN	NC_040058.1	181060	181181	peak_12208	122	-	utr3	rna-XM_027467801.1	RBSN	NC_040058.1	182288	183427	peak_12760	1140	-	cds	rna-XM_027467801.1
IFT122	IFT122	NC_040058.1	461534	463367	peak_12211	1834	-	PR_intron	rna-XM_027468057.1	IFT122	NC_040058.1	456322	463278	peak_12762	6957	-	PR_intron	rna-XM_027468057.1
LOC101796791	LOC101796791	NC_040058.1	482171	482411	peak_12212	241	-	utr3	rna-XM_013092546.3	LOC101796791	NC_040058.1	482171	482441	peak_12763	271	-	utr3	rna-XM_013092546.3
IRAK2	IRAK2	NC_040058.1	512180	512390	peak_12214	211	-	utr3	rna-XM_027467409.1	IRAK2	NC_040058.1	512150	512908	peak_12766	759	-	PR_intron	rna-XM_027467409.1
LOC110351418	LOC110351418	NC_040058.1	528841	529141	peak_12215	301	-	utr3	rna-XM_027467845.1	LOC110351418	NC_040058.1	528812	529111	peak_12767	300	-	utr3	rna-XM_027467845.1
THUMPD3	THUMPD3	NC_040058.1	531143	531753	peak_12216	611	-	PR_intron	rna-XM_027467676.1	THUMPD3	NC_040058.1	531113	531443	peak_12768	331	-	utr3	rna-XM_027467676.1
CAV3	CAV3	NC_040058.1	750289	750826	peak_12218	538	-	utr3	rna-NM_001310829.1	CAV3	NC_040058.1	750289	750856	peak_12770	568	-	utr3	rna-NM_001310829.1
LOC113844156	LOC113844156	NC_040046.1	202074741	202074861	peak_1222	121	+	cds	rna-XM_027461866.1	LOC113844156	NC_040046.1	202075364	202075454	peak_1300	91	+	cds	rna-XM_027461866.1
LMCD1	LMCD1	NC_040058.1	801581	801909	peak_12220	329	-	utr3	rna-XM_027467416.1	LMCD1	NC_040058.1	801581	801969	peak_12772	389	-	utr3	rna-XM_027467416.1
BHLHE40	BHLHE40	NC_040058.1	1618340	1619265	peak_12222	926	-	cds	rna-XM_027467426.1	BHLHE40	NC_040058.1	1618310	1618669	peak_12775	360	-	utr3	rna-XM_027467426.1
ITPR1	ITPR1	NC_040058.1	1697620	1699866	peak_12223	2247	-	PR_intron	rna-XM_021272729.2	ITPR1	NC_040058.1	1696496	1699866	peak_12777	3371	-	PR_intron	rna-XM_021272729.2
LOC101794070	LOC101794070	NC_040058.1	1856920	1856981	peak_12227	62	-	utr3	rna-XM_027467553.1	LOC101794070	NC_040058.1	1856861	1857070	peak_12781	210	-	utr3	rna-XM_027467553.1
1961e84c-aa73-4203-8ad1-36b9def555b5	1961e84c-aa73-4203-8ad1-36b9def555b5	NC_040058.1	1959158	1959757	peak_12228	600	-	NP_exon	1961e84c-aa73-4203-8ad1-36b9def555b5.trans	1961e84c-aa73-4203-8ad1-36b9def555b5	NC_040058.1	1959128	1959757	peak_12784	630	-	NP_exon	1961e84c-aa73-4203-8ad1-36b9def555b5.trans
TRNT1	TRNT1	NC_040058.1	2151271	2152337	peak_12232	1067	-	PR_intron	rna-XM_027467396.1	TRNT1	NC_040058.1	2151241	2152367	peak_12788	1127	-	PR_intron	rna-XM_027467396.1
PPP4R2	PPP4R2	NC_040058.1	3890971	3892752	peak_12235	1782	-	PR_intron	rna-XM_027468021.1	PPP4R2	NC_040058.1	3890941	3891092	peak_12790	152	-	cds	rna-XM_027468021.1
GXYLT2	GXYLT2	NC_040058.1	3929145	3929384	peak_12237	240	-	utr3	rna-XM_027468020.1	GXYLT2	NC_040058.1	3929145	3929384	peak_12793	240	-	utr3	rna-XM_027468020.1
GPR27	GPR27	NC_040058.1	4212391	4212630	peak_12239	240	-	cds	rna-XM_013091796.3	GPR27	NC_040058.1	4212421	4212809	peak_12795	389	-	cds	rna-XM_013091796.3
MITF	MITF	NC_040058.1	5008606	5008967	peak_12241	362	-	cds	rna-XM_027467278.1	MITF	NC_040058.1	5008606	5008877	peak_12797	272	-	cds	rna-XM_027467278.1
KBTBD8	KBTBD8	NC_040058.1	6056891	6057220	peak_12244	330	-	cds	rna-XM_027467623.1	KBTBD8	NC_040058.1	6053728	6053937	peak_12799	210	-	cds	rna-XM_027467623.1
ATXN7	ATXN7	NC_040058.1	7192220	7192461	peak_12246	242	-	utr3	rna-XM_027467751.1	ATXN7	NC_040058.1	7192220	7192521	peak_12803	302	-	utr3	rna-XM_027467751.1
DENND6B	DENND6B	NC_040046.1	202301306	202301366	peak_1225	61	+	utr3	rna-XM_027461935.1	DENND6B	NC_040046.1	202301157	202301575	peak_1301	419	+	utr3	rna-XM_027461935.1
PTPRG	PTPRG	NC_040058.1	7763740	7764579	peak_12251	840	-	PR_intron	rna-XM_027467840.1	PTPRG	NC_040058.1	7750137	7750198	peak_12808	62	-	utr3	rna-XM_027467840.1
KCTD6	KCTD6	NC_040058.1	9147180	9147358	peak_12253	179	-	cds	rna-XM_027468038.1	KCTD6	NC_040058.1	9147120	9147417	peak_12812	298	-	cds	rna-XM_027468038.1
PXK	PXK	NC_040058.1	9159612	9159673	peak_12255	62	-	cds	rna-XM_027468036.1	PXK	NC_040058.1	9159545	9159694	peak_12814	150	-	cds	rna-XM_027468036.1
HTD2	HTD2	NC_040058.1	9196959	9197105	peak_12257	147	-	cds	rna-XM_027468051.1	HTD2	NC_040058.1	9196930	9197192	peak_12816	263	-	cds	rna-XM_027468051.1
PRKAR2A	PRKAR2A	NC_040058.1	9204649	9204979	peak_12258	331	-	utr3	rna-XM_027468049.1	PRKAR2A	NC_040058.1	9202255	9202316	peak_12817	62	-	utr3	rna-XM_027468049.1
APPL1	APPL1	NC_040058.1	9405343	9406981	peak_12259	1639	-	PR_intron	rna-XM_027467475.1	APPL1	NC_040058.1	9405313	9407011	peak_12820	1699	-	PR_intron	rna-XM_027467475.1
NINJ1	NINJ1	NC_040058.1	11803053	11803294	peak_12266	242	-	utr3	rna-XM_027467636.1	NINJ1	NC_040058.1	11802994	11803324	peak_12827	331	-	utr3	rna-XM_027467636.1
9b5a9b49-1d58-4bef-b11b-bd16006eb2e5	9b5a9b49-1d58-4bef-b11b-bd16006eb2e5	NC_040058.1	12665240	12665571	peak_12267	332	-	NP_exon	9b5a9b49-1d58-4bef-b11b-bd16006eb2e5.trans	9b5a9b49-1d58-4bef-b11b-bd16006eb2e5	NC_040058.1	12665240	12665571	peak_12828	332	-	NP_exon	9b5a9b49-1d58-4bef-b11b-bd16006eb2e5.trans
FBLN2	FBLN2	NC_040058.1	12677569	12679545	peak_12269	1977	-	PR_intron	rna-XM_027467427.1	FBLN2	NC_040058.1	12677599	12679575	peak_12830	1977	-	PR_intron	rna-XM_027467427.1
LOC101794121	LOC101794121	NC_040046.1	202343714	202344344	peak_1227	631	+	PR_intron	rna-XM_027462003.1	LOC101794121	NC_040046.1	202343743	202344284	peak_1302	542	+	PR_intron	rna-XM_027462003.1
HDAC11	HDAC11	NC_040058.1	12838195	12838316	peak_12273	122	-	PR_intron	rna-XM_027467599.1	HDAC11	NC_040058.1	12839657	12842696	peak_12833	3040	-	PR_intron	rna-XM_027467595.1
ISY1	ISY1	NC_040058.1	13549796	13561285	peak_12275	11490	-	PR_intron	rna-XM_027467963.1	ISY1	NC_040058.1	13549766	13559035	peak_12834	9270	-	PR_intron	rna-XM_027467963.1
CNBP	CNBP	NC_040058.1	13562942	13563504	peak_12276	563	-	utr3	rna-XM_027467441.1	CNBP	NC_040058.1	13562942	13563504	peak_12835	563	-	utr3	rna-XM_027467441.1
TSEN2	TSEN2	NC_040058.1	13708528	13708619	peak_12278	92	-	cds	rna-XM_027467854.1	TSEN2	NC_040058.1	13708468	13708648	peak_12838	181	-	cds	rna-XM_027467854.1
HRH1	HRH1	NC_040058.1	14444008	14444129	peak_12280	122	-	cds	rna-XM_027467685.1	HRH1	NC_040058.1	14442179	14442330	peak_12840	152	-	utr3	rna-XM_027467685.1
ATP2B2	ATP2B2	NC_040058.1	14959477	14967907	peak_12283	8431	-	PR_intron	rna-XM_027467742.1	ATP2B2	NC_040058.1	14881610	14881700	peak_12844	91	-	cds	rna-XM_027467734.1
NOL8	NOL8	NC_040058.1	15457838	15457899	peak_12285	62	-	utr3	rna-XM_027467857.1	NOL8	NC_040058.1	15459324	15459995	peak_12848	672	-	PR_intron	rna-XM_027467857.1
CENPP	CENPP	NC_040058.1	15473074	15473135	peak_12290	62	-	utr5	rna-XM_027467670.1	CENPP	NC_040058.1	15473065	15473154	peak_12655	90	+	utr5	rna-XM_027467670.1
IPPK	IPPK	NC_040058.1	15640451	15640601	peak_12294	151	-	utr5	rna-XM_027467858.1	IPPK	NC_040058.1	15614760	15615951	peak_12857	1192	-	PR_intron	rna-XM_027467858.1
IP6K1	IP6K1	NC_040058.1	15807541	15808019	peak_12296	479	-	cds	rna-XM_027468016.1	IP6K1	NC_040058.1	15807541	15808019	peak_12860	479	-	cds	rna-XM_027468016.1
6d722ad0-f777-4bc3-bff3-4ed934f9d887	6d722ad0-f777-4bc3-bff3-4ed934f9d887	NC_040058.1	15854281	15854413	peak_12298	133	-	NP_exon	6d722ad0-f777-4bc3-bff3-4ed934f9d887.trans	6d722ad0-f777-4bc3-bff3-4ed934f9d887	NC_040058.1	15854255	15854413	peak_12862	159	-	NP_exon	6d722ad0-f777-4bc3-bff3-4ed934f9d887.trans
UBA7	UBA7	NC_040058.1	15854285	15856087	peak_12299	1803	-	PR_intron	rna-XM_027467933.1	UBA7	NC_040058.1	15854255	15856117	peak_12863	1863	-	PR_intron	rna-XM_027467933.1
ENDOD1	ENDOD1	NC_040046.1	10691740	10691891	peak_123	152	+	cds	rna-XM_005012846.4	ENDOD1	NC_040046.1	10691650	10691920	peak_125	271	+	cds	rna-XM_005012846.4
DAG1	DAG1	NC_040058.1	15868988	15869649	peak_12302	662	-	utr3	rna-XM_027467949.1	DAG1	NC_040058.1	15869108	15869649	peak_12865	542	-	utr3	rna-XM_027467949.1
BSN	BSN	NC_040058.1	15925820	15926009	peak_12305	190	-	PR_intron	rna-XM_027467254.1	BSN	NC_040058.1	15927021	15927553	peak_12871	533	-	PR_intron	rna-XM_027467254.1
TRAIP	TRAIP	NC_040058.1	15997662	16000256	peak_12314	2595	-	PR_intron	rna-XM_027467250.1	TRAIP	NC_040058.1	15997662	16000919	peak_12879	3258	-	PR_intron	rna-XM_027467250.1
MON1A	MON1A	NC_040058.1	16033462	16033641	peak_12315	180	-	utr3	rna-XM_027467247.1	MON1A	NC_040058.1	16034265	16034504	peak_12880	240	-	utr3	rna-XM_027467247.1
RAD54L2	RAD54L2	NC_040058.1	16113922	16114311	peak_12318	390	-	PR_intron	rna-XM_027467237.1	RAD54L2	NC_040058.1	16113952	16114251	peak_12882	300	-	PR_intron	rna-XM_027467237.1
FANCD2	FANCD2	NC_040058.1	16256617	16257543	peak_12323	927	-	PR_intron	rna-XM_027467990.1	FANCD2	NC_040058.1	16256617	16257543	peak_12887	927	-	PR_intron	rna-XM_027467990.1
USP4	USP4	NC_040058.1	16355958	16356109	peak_12324	152	-	NP_exon	rna-XR_003500377.1	USP4	NC_040058.1	16355988	16356109	peak_12888	122	-	NP_exon	rna-XR_003500377.1
RHOA	RHOA	NC_040058.1	16365617	16366812	peak_12325	1196	-	PR_intron	rna-XM_027467228.1	RHOA	NC_040058.1	16365617	16366782	peak_12889	1166	-	PR_intron	rna-XM_027467228.1
RRP9	RRP9	NC_040058.1	16438162	16439109	peak_12326	948	-	cds	rna-XM_027467732.1	RRP9	NC_040058.1	16438162	16439109	peak_12890	948	-	cds	rna-XM_027467732.1
TNNC1	TNNC1	NC_040058.1	16863795	16863882	peak_12327	88	-	utr3	rna-XM_005025302.4	TNNC1	NC_040058.1	16863795	16869272	peak_12891	5478	-	PR_intron	rna-XM_005025302.4
PBRM1	PBRM1	NC_040058.1	17021958	17024967	peak_12329	3010	-	PR_intron	rna-XM_027467296.1	PBRM1	NC_040058.1	17021958	17027453	peak_12892	5496	-	PR_intron	rna-XM_027467296.1
NEK4	NEK4	NC_040058.1	17077047	17079169	peak_12333	2123	-	PR_intron	rna-XM_027467316.1	NEK4	NC_040058.1	17077077	17077886	peak_12896	810	-	PR_intron	rna-XM_021276178.2
LOC101800783	LOC101800783	NC_040058.1	17155263	17156253	peak_12335	991	-	PR_intron	rna-XM_027467323.1	LOC101800783	NC_040058.1	17147104	17147164	peak_12898	61	-	PR_intron	rna-XM_027467323.1
SFMBT1	SFMBT1	NC_040058.1	17188437	17188528	peak_12336	92	-	utr3	rna-XM_027467308.1	SFMBT1	NC_040058.1	17188137	17188198	peak_12900	62	-	utr3	rna-XM_027467308.1
LOC101795985	LOC101795985	NC_040058.1	17628058	17628179	peak_12339	122	-	utr3	rna-XM_027467892.1	LOC101795985	NC_040058.1	17642403	17643119	peak_12903	717	-	PR_intron	rna-XM_027467892.1
TMEM115	TMEM115	NC_040058.1	17725224	17725463	peak_12341	240	-	utr3	rna-XM_027467336.1	TMEM115	NC_040058.1	17725224	17725463	peak_12904	240	-	utr3	rna-XM_027467336.1
LOC101799806	LOC101799806	NC_040058.1	17741989	17812988	peak_12343	71000	-	PR_intron	rna-XM_027467341.1	LOC101799806	NC_040058.1	17746001	17812988	peak_12907	66988	-	PR_intron	rna-XM_027467341.1
a1c749f3-748f-44d6-8ade-5a92e9d3e107	a1c749f3-748f-44d6-8ade-5a92e9d3e107	NC_040058.1	18504473	18504713	peak_12345	241	-	NP_exon	a1c749f3-748f-44d6-8ade-5a92e9d3e107.trans	a1c749f3-748f-44d6-8ade-5a92e9d3e107	NC_040058.1	18504473	18504743	peak_12911	271	-	NP_exon	a1c749f3-748f-44d6-8ade-5a92e9d3e107.trans
RBM5	RBM5	NC_040058.1	18535117	18538277	peak_12347	3161	-	PR_intron	rna-XM_027467919.1	RBM5	NC_040058.1	18535255	18536800	peak_12913	1546	-	PR_intron	rna-XM_027467919.1
PPM1M	PPM1M	NC_040058.1	18741947	18742007	peak_12350	61	-	utr3	rna-XM_027467872.1	PPM1M	NC_040058.1	18742036	18742274	peak_12917	239	-	utr3	rna-XM_027467872.1
ARF4	ARF4	NC_040058.1	18903601	18904269	peak_12351	669	-	PR_intron	rna-XM_027467414.1	ARF4	NC_040058.1	18903601	18904299	peak_12919	699	-	PR_intron	rna-XM_027467414.1
72b8c39a-4b1b-469e-82fb-92999f428fe0	72b8c39a-4b1b-469e-82fb-92999f428fe0	NC_040058.1	19381597	19382159	peak_12353	563	-	NP_exon	72b8c39a-4b1b-469e-82fb-92999f428fe0.trans	72b8c39a-4b1b-469e-82fb-92999f428fe0	NC_040058.1	19381597	19382159	peak_12921	563	-	NP_exon	72b8c39a-4b1b-469e-82fb-92999f428fe0.trans
RAB7A	RAB7A	NC_040058.1	19389308	19389548	peak_12355	241	-	utr3	rna-XM_027467612.1	RAB7A	NC_040058.1	19389308	19389488	peak_12925	181	-	utr3	rna-XM_027467612.1
LOC101803678	LOC101803678	NC_040058.1	19597980	19599525	peak_12357	1546	-	PR_intron	rna-XM_013092339.3	LOC101803678	NC_040058.1	19597950	19599345	peak_12927	1396	-	PR_intron	rna-XM_013092339.3
EEFSEC	EEFSEC	NC_040058.1	19673294	19726542	peak_12358	53249	-	PR_intron	rna-XM_027468054.1	EEFSEC	NC_040058.1	19673294	19713184	peak_12929	39891	-	PR_intron	rna-XM_027468054.1
SEC61A1	SEC61A1	NC_040058.1	19835247	19835427	peak_12359	181	-	utr3	rna-XM_027468055.1	SEC61A1	NC_040058.1	19835247	19835367	peak_12931	121	-	utr3	rna-XM_027468055.1
PODXL2	PODXL2	NC_040058.1	20011107	20011376	peak_12362	270	-	utr3	rna-XM_027467513.1	PODXL2	NC_040058.1	20011077	20011317	peak_12932	241	-	utr3	rna-XM_027467513.1
0bbfa08e-cac8-40b3-811e-c656cf8c47dd	0bbfa08e-cac8-40b3-811e-c656cf8c47dd	NC_040058.1	20013999	20014417	peak_12363	419	-	NP_exon	0bbfa08e-cac8-40b3-811e-c656cf8c47dd.trans	0bbfa08e-cac8-40b3-811e-c656cf8c47dd	NC_040058.1	20013969	20014447	peak_12933	479	-	NP_exon	0bbfa08e-cac8-40b3-811e-c656cf8c47dd.trans
MCM2	MCM2	NC_040058.1	20049584	20049793	peak_12367	210	-	utr3	rna-XM_027467692.1	MCM2	NC_040058.1	20049613	20049853	peak_12937	241	-	utr3	rna-XM_027467692.1
LOC101793940	LOC101793940	NC_040046.1	202398033	202399609	peak_1237	1577	+	PR_intron	rna-XM_027462021.1	LOC101793940	NC_040046.1	202402230	202404583	peak_1314	2354	+	PR_intron	rna-XM_027462021.1
SLC41A3	SLC41A3	NC_040058.1	20866580	20866671	peak_12370	92	-	utr5	rna-XM_005025095.4	SLC41A3	NC_040058.1	20871000	20871464	peak_12940	465	-	PR_intron	rna-XM_021276030.2
KLF15	KLF15	NC_040058.1	20997854	20998035	peak_12372	182	-	utr3	rna-XM_013104678.3	KLF15	NC_040058.1	21000193	21000374	peak_12941	182	-	cds	rna-XM_013104678.3
ZXDC	ZXDC	NC_040058.1	21053260	21055226	peak_12375	1967	-	PR_intron	rna-XM_005025111.4	ZXDC	NC_040058.1	21049883	21050064	peak_12943	182	-	utr3	rna-XM_005025111.4
CHCHD4	CHCHD4	NC_040058.1	21166300	21171715	peak_12378	5416	-	PR_intron	rna-XM_027468001.1	CHCHD4	NC_040058.1	21166271	21173980	peak_12947	7710	-	PR_intron	rna-XM_027468001.1
XPC	XPC	NC_040058.1	21188316	21189874	peak_12380	1559	-	PR_intron	rna-XM_027467996.1	XPC	NC_040058.1	21188286	21189874	peak_12948	1589	-	PR_intron	rna-XM_027467996.1
GRIP2	GRIP2	NC_040058.1	21446913	21447094	peak_12385	182	-	cds	rna-XM_027467482.1	GRIP2	NC_040058.1	21679735	21689028	peak_12952	9294	-	PR_intron	rna-XM_021276645.2
LHFPL4	LHFPL4	NC_040058.1	21876944	21877183	peak_12388	240	-	utr3	rna-XM_027467347.1	LHFPL4	NC_040058.1	21876944	21877124	peak_12953	181	-	utr3	rna-XM_027467347.1
SHANK3	SHANK3	NC_040046.1	202823196	202823467	peak_1239	272	+	cds	rna-XM_027455760.1	SHANK3	NC_040046.1	202709625	202769943	peak_1317	60319	+	PR_intron	rna-XM_027455760.1
6c32367a-4492-49c8-b38e-0202af4580b6	6c32367a-4492-49c8-b38e-0202af4580b6	NC_040058.1	21936132	21936310	peak_12390	179	-	NP_exon	6c32367a-4492-49c8-b38e-0202af4580b6.trans	6c32367a-4492-49c8-b38e-0202af4580b6	NC_040058.1	21936161	21936310	peak_12955	150	-	NP_exon	6c32367a-4492-49c8-b38e-0202af4580b6.trans
LAMB2	LAMB2	NC_040058.1	21936132	21936582	peak_12391	451	-	cds	rna-XM_027467356.1	LAMB2	NC_040058.1	21936671	21936865	peak_12957	195	-	PR_intron	rna-XM_027467356.1
CCDC71	CCDC71	NC_040058.1	21961339	21961729	peak_12393	391	-	utr3	rna-XM_027467403.1	CCDC71	NC_040058.1	21961429	21961580	peak_12958	152	-	utr3	rna-XM_027467403.1
QRICH1	QRICH1	NC_040058.1	22022880	22023510	peak_12398	631	-	utr3	rna-XM_027467272.1	QRICH1	NC_040058.1	22022880	22023240	peak_12963	361	-	utr3	rna-XM_027467272.1
QARS	QARS	NC_040058.1	22048112	22049654	peak_12400	1543	-	PR_intron	rna-XM_027467417.1	QARS	NC_040058.1	22048112	22049654	peak_12969	1543	-	PR_intron	rna-XM_027467417.1
LOC113845031	LOC113845031	NC_040058.1	22052502	22052682	peak_12402	181	-	cds	rna-XM_027467418.1	LOC113845031	NC_040058.1	22051966	22052116	peak_12970	151	-	cds	rna-XM_027467418.1
LOC113845032	LOC113845032	NC_040058.1	22060118	22060264	peak_12403	147	-	utr5	rna-XM_027467421.1	LOC113845032	NC_040058.1	22060089	22060206	peak_12972	118	-	utr5	rna-XM_027467421.1
USP19	USP19	NC_040058.1	22062477	22062746	peak_12404	270	-	utr3	rna-XM_027467419.1	USP19	NC_040058.1	22062507	22062687	peak_12973	181	-	utr3	rna-XM_027467419.1
DIPK2A	DIPK2A	NC_040059.1	3185	14347	peak_12405	11163	+	PR_intron	rna-XM_013109177.3	DIPK2A	NC_040059.1	3155	4877	peak_12975	1723	+	PR_intron	rna-XM_013109177.3
AGTR1	AGTR1	NC_040059.1	1690479	1690719	peak_12406	241	+	cds	rna-XM_027468300.1	AGTR1	NC_040059.1	1688326	1688477	peak_12979	152	+	cds	rna-XM_027468300.1
LOC106017999	LOC106017999	NC_040059.1	1976559	1976769	peak_12408	211	+	NP_intron	rna-XR_003500486.1	LOC106017999	NC_040059.1	1976589	1976799	peak_12981	211	+	NP_intron	rna-XR_002403504.2
CDC23	CDC23	NC_040059.1	2024063	2024214	peak_12411	152	+	utr5	rna-XM_027468455.1	CDC23	NC_040059.1	2034211	2034601	peak_12984	391	+	utr3	rna-XM_027468457.1
JAKMIP2	JAKMIP2	NC_040059.1	2040532	2062232	peak_12414	21701	+	PR_intron	rna-XM_027468146.1	JAKMIP2	NC_040059.1	2040004	2041005	peak_12985	1002	+	PR_intron	rna-XM_027468146.1
NUP98	NUP98	NC_040046.1	66765	66885	peak_1242	121	-	utr3	rna-XM_027465474.1	NUP98	NC_040046.1	66795	66915	peak_1319	121	-	utr3	rna-XM_027465474.1
PPP2R2B	PPP2R2B	NC_040059.1	2261877	2263615	peak_12420	1739	+	PR_intron	rna-XM_013102368.3	PPP2R2B	NC_040059.1	2261877	2263645	peak_12992	1769	+	PR_intron	rna-XM_013102368.3
PRELID2	PRELID2	NC_040059.1	2481075	2481314	peak_12424	240	+	NP_exon	rna-XR_003500465.1	PRELID2	NC_040059.1	2481045	2481284	peak_12994	240	+	NP_exon	rna-XR_003500465.1
YIPF5	YIPF5	NC_040059.1	2757756	2757965	peak_12425	210	+	utr3	rna-XM_005022474.4	YIPF5	NC_040059.1	2757726	2757994	peak_12995	269	+	utr3	rna-XM_005022474.4
NR3C1	NR3C1	NC_040059.1	2912780	2912961	peak_12426	182	+	cds	rna-XM_027468464.1	NR3C1	NC_040059.1	2912721	2912991	peak_12996	271	+	cds	rna-XM_027468464.1
FAM160A2	FAM160A2	NC_040046.1	516339	516727	peak_1243	389	-	utr3	rna-XM_027465725.1	FAM160A2	NC_040046.1	516339	516727	peak_1321	389	-	utr3	rna-XM_027465725.1
FGF1	FGF1	NC_040059.1	3134220	3135406	peak_12430	1187	+	PR_intron	rna-XM_013102358.3	FGF1	NC_040059.1	3130814	3135376	peak_13000	4563	+	PR_intron	rna-XM_013102358.3
SPRY4	SPRY4	NC_040059.1	3192375	3192495	peak_12432	121	+	cds	rna-XM_027468540.1	SPRY4	NC_040059.1	3192315	3192465	peak_13002	151	+	cds	rna-XM_027468540.1
GNPDA1	GNPDA1	NC_040059.1	3237908	3238476	peak_12436	569	+	utr3	rna-XM_021274457.2	GNPDA1	NC_040059.1	3237938	3238447	peak_13005	510	+	utr3	rna-XM_021274457.2
ZCCHC10	ZCCHC10	NC_040059.1	3274243	3276723	peak_12437	2481	+	PR_intron	rna-XM_027468140.1	ZCCHC10	NC_040059.1	3274243	3276753	peak_13006	2511	+	PR_intron	rna-XM_027468140.1
AFF4	AFF4	NC_040059.1	3300908	3301596	peak_12440	689	+	NP_intron	rna-XR_003500581.1	AFF4	NC_040059.1	3301625	3301836	peak_13008	212	+	NP_exon	rna-XR_003500581.1
SHROOM1	SHROOM1	NC_040059.1	3370701	3371031	peak_12448	331	+	cds	rna-XM_027468669.1	SHROOM1	NC_040059.1	3369446	3369835	peak_13013	390	+	cds	rna-XM_027468669.1
LCMT2	LCMT2	NC_040046.1	571498	571559	peak_1245	62	-	PR_intron	rna-XM_027465843.1	LCMT2	NC_040046.1	574716	574837	peak_1323	122	-	NP_intron	rna-XR_003499734.1
SEPT8	SEPT8	NC_040059.1	3417571	3432620	peak_12451	15050	+	PR_intron	rna-XM_027468063.1	SEPT8	NC_040059.1	3417601	3432620	peak_13017	15020	+	PR_intron	rna-XM_027468063.1
KIF3A	KIF3A	NC_040059.1	3443085	3450735	peak_12452	7651	+	PR_intron	rna-XM_027468440.1	KIF3A	NC_040059.1	3443055	3450705	peak_13018	7651	+	PR_intron	rna-XM_027468440.1
IRF1	IRF1	NC_040059.1	3525739	3526506	peak_12453	768	+	PR_intron	rna-XM_005030705.4	IRF1	NC_040059.1	3523670	3523760	peak_13019	91	+	cds	rna-XM_005030705.4
P4HA2	P4HA2	NC_040059.1	3682620	3683792	peak_12454	1173	+	PR_intron	rna-XM_027468453.1	P4HA2	NC_040059.1	3682620	3683762	peak_13021	1143	+	PR_intron	rna-XM_027468453.1
ACSL6	ACSL6	NC_040059.1	3802290	3805170	peak_12455	2881	+	PR_intron	rna-XM_027468215.1	ACSL6	NC_040059.1	3805259	3805439	peak_13022	181	+	utr3	rna-XM_027468215.1
FNIP1	FNIP1	NC_040059.1	3884141	3884322	peak_12458	182	+	cds	rna-XM_021266729.2	FNIP1	NC_040059.1	3884171	3884352	peak_13023	182	+	cds	rna-XM_021266729.2
RAPGEF6	RAPGEF6	NC_040059.1	3903507	3903598	peak_12462	92	+	utr5	rna-XM_027468205.1	RAPGEF6	NC_040059.1	3985719	3986512	peak_13027	794	+	PR_intron	rna-XM_027468206.1
TCF7	TCF7	NC_040059.1	4615663	4615753	peak_12468	91	+	cds	rna-XM_027468668.1	TCF7	NC_040059.1	4621750	4622131	peak_13030	382	+	PR_intron	rna-XM_027468668.1
JADE2	JADE2	NC_040059.1	4776027	4783987	peak_12469	7961	+	PR_intron	rna-XM_027468714.1	JADE2	NC_040059.1	4776057	4783987	peak_13032	7931	+	PR_intron	rna-XM_027468714.1
ILK	ILK	NC_040046.1	690496	690737	peak_1247	242	-	utr3	rna-XM_027466011.1	ILK	NC_040046.1	690496	690737	peak_1325	242	-	utr3	rna-XM_027466011.1
SEC24A	SEC24A	NC_040059.1	4857938	4858148	peak_12475	211	+	utr3	rna-XM_027468728.1	SEC24A	NC_040059.1	4842581	4842851	peak_13040	271	+	cds	rna-XM_027468728.1
CAMLG	CAMLG	NC_040059.1	4864574	4864664	peak_12477	91	+	cds	rna-XM_027468161.1	CAMLG	NC_040059.1	4869290	4869440	peak_13043	151	+	utr3	rna-XM_027468161.1
DDX46	DDX46	NC_040059.1	4869977	4877242	peak_12479	7266	+	PR_intron	rna-XM_027468160.1	DDX46	NC_040059.1	4869917	4877242	peak_13044	7326	+	PR_intron	rna-XM_027468160.1
C14H5orf24	C14H5orf24	NC_040059.1	4905326	4905745	peak_12481	420	+	cds	rna-XM_027468297.1	C14H5orf24	NC_040059.1	4905296	4905745	peak_13046	450	+	cds	rna-XM_027468297.1
TXNDC15	TXNDC15	NC_040059.1	4914159	4915187	peak_12483	1029	+	PR_intron	rna-XM_027468296.1	TXNDC15	NC_040059.1	4914277	4915217	peak_13048	941	+	PR_intron	rna-XM_027468296.1
PCBD2	PCBD2	NC_040059.1	4919202	4919351	peak_12485	150	+	cds	rna-XM_027468460.1	PCBD2	NC_040059.1	4919232	4919351	peak_13050	120	+	cds	rna-XM_027468460.1
SLC25A48	SLC25A48	NC_040059.1	5372668	5372819	peak_12486	152	+	utr3	rna-XM_027468564.1	SLC25A48	NC_040059.1	5372698	5372849	peak_13051	152	+	utr3	rna-XM_027468564.1
FBXL21P	FBXL21P	NC_040059.1	5407683	5408041	peak_12487	359	+	cds	rna-XM_005018689.4	FBXL21P	NC_040059.1	5407683	5407922	peak_13053	240	+	cds	rna-XM_005018689.4
SMAD5	SMAD5	NC_040059.1	5513002	5522940	peak_12488	9939	+	PR_intron	rna-XM_005018687.4	SMAD5	NC_040059.1	5513032	5513123	peak_13054	92	+	utr5	rna-XM_005018687.4
MYOT	MYOT	NC_040059.1	6276709	6277039	peak_12491	331	+	PR_intron	rna-XM_027468480.1	MYOT	NC_040059.1	6276739	6277039	peak_13058	301	+	PR_intron	rna-XM_027468480.1
HNRNPAB	HNRNPAB	NC_040059.1	6411550	6414231	peak_12493	2682	+	PR_intron	rna-XM_005028664.4	HNRNPAB	NC_040059.1	6411550	6414231	peak_13060	2682	+	PR_intron	rna-XM_005028664.4
COL23A1	COL23A1	NC_040059.1	6436658	6437018	peak_12495	361	+	PR_intron	rna-XM_027468629.1	COL23A1	NC_040059.1	6436658	6436988	peak_13063	331	+	PR_intron	rna-XM_027468629.1
RUFY1	RUFY1	NC_040059.1	7159166	7159287	peak_12498	122	+	cds	rna-XM_021275548.2	RUFY1	NC_040059.1	7159166	7159347	peak_13064	182	+	cds	rna-XM_021275548.2
CANX	CANX	NC_040059.1	7220085	7227596	peak_12502	7512	+	PR_intron	rna-XM_027468621.1	CANX	NC_040059.1	7220085	7227596	peak_13067	7512	+	PR_intron	rna-XM_027468621.1
MAML1	MAML1	NC_040059.1	7249871	7249932	peak_12505	62	+	cds	rna-XM_027468625.1	MAML1	NC_040059.1	7239503	7239653	peak_13069	151	+	utr5	rna-XM_027468625.1
HMGXB3	HMGXB3	NC_040059.1	7503639	7503700	peak_12507	62	+	cds	rna-XM_027468637.1	HMGXB3	NC_040059.1	7503669	7503849	peak_13073	181	+	cds	rna-XM_027468637.1
TIMM10B	TIMM10B	NC_040046.1	728848	728908	peak_1251	61	-	utr3	rna-XM_027466062.1	TIMM10B	NC_040046.1	728848	728938	peak_1328	91	-	utr3	rna-XM_027466062.1
TCOF1	TCOF1	NC_040059.1	7673509	7676785	peak_12512	3277	+	PR_intron	rna-XM_027468169.1	TCOF1	NC_040059.1	7673509	7676785	peak_13076	3277	+	PR_intron	rna-XM_027468169.1
NDST1	NDST1	NC_040059.1	7733418	7733807	peak_12516	390	+	cds	rna-XM_027468673.1	NDST1	NC_040059.1	7733418	7733748	peak_13080	331	+	cds	rna-XM_027468673.1
SMIM3	SMIM3	NC_040059.1	7836481	7836660	peak_12518	180	+	utr3	rna-XM_027468348.1	SMIM3	NC_040059.1	7835946	7836125	peak_13081	180	+	cds	rna-XM_027468348.1
WDR73	WDR73	NC_040046.1	865907	866026	peak_1252	120	-	cds	rna-XM_027466020.1	WDR73	NC_040046.1	865878	866026	peak_1329	149	-	cds	rna-XM_027466020.1
GM2A	GM2A	NC_040059.1	7894942	7895122	peak_12520	181	+	utr3	rna-XM_027468223.1	GM2A	NC_040059.1	7894942	7895062	peak_13084	121	+	utr3	rna-XM_027468223.1
G3BP1	G3BP1	NC_040059.1	8038810	8040542	peak_12523	1733	+	PR_intron	rna-XM_027468099.1	G3BP1	NC_040059.1	8038780	8040512	peak_13088	1733	+	PR_intron	rna-XM_027468099.1
GRIA1	GRIA1	NC_040059.1	8539536	8539777	peak_12525	242	+	PR_intron	rna-XM_027468284.1	GRIA1	NC_040059.1	8665398	8665459	peak_13090	62	+	utr3	rna-XM_027468283.1
MFAP3	MFAP3	NC_040059.1	8696731	8697002	peak_12528	272	+	utr5	rna-XM_027468231.1	MFAP3	NC_040059.1	8696731	8697062	peak_13092	332	+	utr5	rna-XM_027468231.1
KCNE3	KCNE3	NC_040046.1	1049368	1049578	peak_1253	211	-	cds	rna-XM_027462329.1	KCNE3	NC_040046.1	1049427	1049518	peak_1331	92	-	utr3	rna-XM_027462329.1
GALNT10	GALNT10	NC_040059.1	8784447	8789106	peak_12530	4660	+	PR_intron	rna-XM_021276754.2	GALNT10	NC_040059.1	8784447	8785614	peak_13095	1168	+	PR_intron	rna-XM_021276754.2
SAP30L	SAP30L	NC_040059.1	8836821	8839575	peak_12532	2755	+	PR_intron	rna-XM_027468400.1	SAP30L	NC_040059.1	8838828	8839575	peak_13097	748	+	utr3	rna-XM_027468400.1
LARP1	LARP1	NC_040059.1	8902903	8903412	peak_12535	510	+	cds	rna-XM_027468495.1	LARP1	NC_040059.1	8902903	8903412	peak_13099	510	+	cds	rna-XM_027468495.1
b2c2ada4-d545-47e5-aaaa-8f8baaa3ccd5	b2c2ada4-d545-47e5-aaaa-8f8baaa3ccd5	NC_040046.1	1051420	1051688	peak_1254	269	-	NP_exon	b2c2ada4-d545-47e5-aaaa-8f8baaa3ccd5.trans	b2c2ada4-d545-47e5-aaaa-8f8baaa3ccd5	NC_040046.1	1051479	1051748	peak_1332	270	-	NP_exon	b2c2ada4-d545-47e5-aaaa-8f8baaa3ccd5.trans
CNOT8	CNOT8	NC_040059.1	8975285	8975375	peak_12541	91	+	cds	rna-XM_027468501.1	CNOT8	NC_040059.1	8975256	8975316	peak_13106	61	+	cds	rna-XM_027468501.1
MRPL22	MRPL22	NC_040059.1	9003395	9003486	peak_12543	92	+	cds	rna-XM_027468502.1	MRPL22	NC_040059.1	9003425	9003545	peak_13107	121	+	utr3	rna-XM_027468502.1
CYFIP2	CYFIP2	NC_040059.1	9647254	9647345	peak_12544	92	+	utr5	rna-XM_027468116.1	CYFIP2	NC_040059.1	9695538	9695778	peak_13109	241	+	utr3	rna-XM_027468116.1
LSM11	LSM11	NC_040059.1	9766586	9769387	peak_12546	2802	+	PR_intron	rna-XM_027468691.1	LSM11	NC_040059.1	9766586	9769387	peak_13111	2802	+	PR_intron	rna-XM_027468691.1
CPLX2	CPLX2	NC_040059.1	10672907	10673856	peak_12550	950	+	PR_intron	rna-XM_027468706.1	CPLX2	NC_040059.1	10672847	10673915	peak_13112	1069	+	PR_intron	rna-XM_027468706.1
FAF2	FAF2	NC_040059.1	10717372	10723684	peak_12551	6313	+	PR_intron	rna-XM_027468232.1	FAF2	NC_040059.1	10717372	10723684	peak_13113	6313	+	PR_intron	rna-XM_027468232.1
ZNF346	ZNF346	NC_040059.1	10801028	10801900	peak_12553	873	+	PR_intron	rna-XM_027468074.1	ZNF346	NC_040059.1	10799798	10801900	peak_13115	2103	+	PR_intron	rna-XM_027468074.1
FGFR4	FGFR4	NC_040059.1	10813951	10814071	peak_12555	121	+	cds	rna-XM_027468076.1	FGFR4	NC_040059.1	10813921	10814131	peak_13117	211	+	cds	rna-XM_027468076.1
NSD1	NSD1	NC_040059.1	10824267	10824703	peak_12556	437	+	PR_intron	rna-XM_027468618.1	NSD1	NC_040059.1	10824267	10824733	peak_13118	467	+	PR_intron	rna-XM_027468618.1
LIPT2	LIPT2	NC_040046.1	1053926	1054286	peak_1256	361	-	cds	rna-XM_027462278.1	LIPT2	NC_040046.1	1053986	1054226	peak_1334	241	-	cds	rna-XM_027462278.1
PDLIM7	PDLIM7	NC_040059.1	10899739	10900500	peak_12569	762	+	PR_intron	rna-XM_027468367.1	PDLIM7	NC_040059.1	10899739	10900440	peak_13130	702	+	PR_intron	rna-XM_027468367.1
CHRDL2	CHRDL2	NC_040046.1	1110946	1112735	peak_1257	1790	-	PR_intron	rna-XM_027462174.1	CHRDL2	NC_040046.1	1110946	1112735	peak_1335	1790	-	PR_intron	rna-XM_027462174.1
NHP2	NHP2	NC_040059.1	10951650	10953809	peak_12573	2160	+	PR_intron	rna-XM_027468183.1	NHP2	NC_040059.1	10951650	10953779	peak_13134	2130	+	PR_intron	rna-XM_027468183.1
GRK6	GRK6	NC_040059.1	11014943	11017144	peak_12577	2202	+	PR_intron	rna-XM_027468405.1	GRK6	NC_040059.1	11014943	11015004	peak_13139	62	+	utr5	rna-XM_027468405.1
PRR7	PRR7	NC_040059.1	11033677	11033976	peak_12579	300	+	cds	rna-XM_027468409.1	PRR7	NC_040059.1	11033677	11034006	peak_13140	330	+	cds	rna-XM_027468409.1
PPME1	PPME1	NC_040046.1	1190747	1190928	peak_1258	182	-	NP_exon	rna-XR_003498595.1	PPME1	NC_040046.1	1190747	1190898	peak_1336	152	-	NP_exon	rna-XR_003498595.1
BOD1	BOD1	NC_040059.1	11781582	11781847	peak_12580	266	+	utr3	rna-XM_013107954.3	BOD1	NC_040059.1	11781552	11781877	peak_13142	326	+	utr3	rna-XM_013107954.3
STC2	STC2	NC_040059.1	11884187	11884397	peak_12581	211	+	utr5	rna-XM_027468290.1	STC2	NC_040059.1	11884187	11884368	peak_13143	182	+	utr5	rna-XM_027468290.1
DUSP1	DUSP1	NC_040059.1	12080553	12081029	peak_12583	477	+	utr3	rna-XM_027468541.1	DUSP1	NC_040059.1	12080613	12080880	peak_13147	268	+	utr3	rna-XM_027468541.1
NEURL1B	NEURL1B	NC_040059.1	12213754	12213815	peak_12584	62	+	cds	rna-XM_027468545.1	NEURL1B	NC_040059.1	12213575	12213904	peak_13148	330	+	cds	rna-XM_027468545.1
LOC101800857	LOC101800857	NC_040059.1	12521435	12521586	peak_12585	152	+	utr5	rna-XM_005010002.4	LOC101800857	NC_040059.1	12550007	12550218	peak_13149	212	+	utr3	rna-XM_005010002.4
SRA1	SRA1	NC_040059.1	12615080	12615347	peak_12590	268	+	cds	rna-XM_027468698.1	SRA1	NC_040059.1	12615227	12615377	peak_13152	151	+	cds	rna-XM_027468698.1
HBEGF	HBEGF	NC_040059.1	12752284	12755291	peak_12591	3008	+	PR_intron	rna-XM_027468562.1	HBEGF	NC_040059.1	12759009	12759246	peak_13153	238	+	utr3	rna-XM_027468562.1
PFDN1	PFDN1	NC_040059.1	12764430	12795339	peak_12593	30910	+	PR_intron	rna-XM_027468158.1	PFDN1	NC_040059.1	12764459	12795339	peak_13154	30881	+	PR_intron	rna-XM_027468158.1
TMCO6	TMCO6	NC_040059.1	13419001	13419212	peak_12594	212	+	cds	rna-XM_027468370.1	TMCO6	NC_040059.1	13419001	13419212	peak_13157	212	+	cds	rna-XM_027468370.1
IK	IK	NC_040059.1	13427720	13429972	peak_12595	2253	+	PR_intron	rna-XM_027468372.1	IK	NC_040059.1	13427433	13430002	peak_13158	2570	+	PR_intron	rna-XM_027468372.1
WDR55	WDR55	NC_040059.1	13436768	13437124	peak_12597	357	+	utr3	rna-XM_027468373.1	WDR55	NC_040059.1	13436709	13437094	peak_13160	386	+	cds	rna-XM_027468373.1
LOC113845146	LOC113845146	NC_040059.1	13492785	13493115	peak_12599	331	+	NP_exon	gene-LOC113845146.trans	LOC113845146	NC_040059.1	13491887	13492097	peak_13161	211	+	NP_exon	gene-LOC113845146.trans
CEP57	CEP57	NC_040046.1	10891497	10896306	peak_126	4810	+	PR_intron	rna-XM_027467729.1	CEP57	NC_040046.1	10890125	10890509	peak_127	385	+	PR_intron	rna-XM_027467729.1
LOC113845145	LOC113845145	NC_040059.1	13513094	13513184	peak_12600	91	+	cds	rna-XM_027468326.1	LOC113845145	NC_040059.1	13558229	13558290	peak_13163	62	+	PR_intron	rna-XM_027468326.1
LOC101796191	LOC101796191	NC_040059.1	13729636	13729757	peak_12601	122	+	cds	rna-XM_027468312.1	LOC101796191	NC_040059.1	13729696	13729817	peak_13170	122	+	cds	rna-XM_027468312.1
MRPL48	MRPL48	NC_040046.1	1290995	1291114	peak_1261	120	-	utr5	rna-XM_027462193.1	MRPL48	NC_040046.1	1290100	1291114	peak_1338	1015	-	PR_intron	rna-XM_027462193.1
ARHGEF17	ARHGEF17	NC_040046.1	1521440	1521948	peak_1262	509	-	cds	rna-XM_027462082.1	ARHGEF17	NC_040046.1	1520573	1520814	peak_1339	242	-	cds	rna-XM_027462082.1
PCDH1	PCDH1	NC_040059.1	14094253	14094494	peak_12622	242	+	utr5	rna-XM_027468309.1	PCDH1	NC_040059.1	14094253	14094464	peak_13198	212	+	utr5	rna-XM_027468309.1
5c2d1b16-24f6-4be0-926e-2a82d689b6eb	5c2d1b16-24f6-4be0-926e-2a82d689b6eb	NC_040059.1	14140454	14141234	peak_12627	781	+	NP_exon	5c2d1b16-24f6-4be0-926e-2a82d689b6eb.trans	5c2d1b16-24f6-4be0-926e-2a82d689b6eb	NC_040059.1	14137847	14138807	peak_13201	961	+	NP_exon	5c2d1b16-24f6-4be0-926e-2a82d689b6eb.trans
PCDH12	PCDH12	NC_040059.1	14451387	14451507	peak_12630	121	+	cds	rna-XM_027468310.1	PCDH12	NC_040059.1	14450995	14457381	peak_13398	6387	-	PR_intron	rna-XM_027468310.1
DNAJC18	DNAJC18	NC_040059.1	14493551	14493938	peak_12631	388	+	PR_intron	rna-XM_027468421.1	DNAJC18	NC_040059.1	14493551	14493968	peak_13206	418	+	PR_intron	rna-XM_027468421.1
PROB1	PROB1	NC_040059.1	14509721	14510082	peak_12632	362	+	cds	rna-XM_027468695.1	PROB1	NC_040059.1	14509901	14510052	peak_13207	152	+	cds	rna-XM_027468695.1
SIL1	SIL1	NC_040059.1	14596613	14624524	peak_12636	27912	+	PR_intron	rna-XM_005024927.4	SIL1	NC_040059.1	14596613	14624524	peak_13208	27912	+	PR_intron	rna-XM_005024927.4
CTNNA1	CTNNA1	NC_040059.1	14718476	14718567	peak_12637	92	+	PR_intron	rna-XM_027468651.1	CTNNA1	NC_040059.1	14724587	14724738	peak_13210	152	+	PR_intron	rna-XM_027468651.1
HSPA9	HSPA9	NC_040059.1	14871374	14879794	peak_12639	8421	+	PR_intron	rna-XM_027468389.1	HSPA9	NC_040059.1	14871374	14879794	peak_13211	8421	+	PR_intron	rna-XM_027468389.1
P2RY6	P2RY6	NC_040046.1	1525731	1525970	peak_1264	240	-	utr3	rna-XM_027462253.1	P2RY6	NC_040046.1	1525464	1525525	peak_1342	62	-	utr3	rna-XM_027462253.1
ETF1	ETF1	NC_040059.1	14882277	14882600	peak_12640	324	+	utr5	rna-XM_027468341.1	ETF1	NC_040059.1	14882277	14882600	peak_13212	324	+	utr5	rna-XM_027468341.1
FBXW11	FBXW11	NC_040059.1	14918433	14924180	peak_12644	5748	+	PR_intron	rna-XM_027468126.1	FBXW11	NC_040059.1	14989817	14989997	peak_13216	181	+	utr3	rna-XM_027468126.1
LOC101797491	LOC101797491	NC_040059.1	15267113	15267264	peak_12646	152	+	NP_exon	rna-XR_003500439.1	LOC101797491	NC_040059.1	15299446	15299567	peak_13217	122	+	NP_exon	rna-XR_003500439.1
LCP2	LCP2	NC_040059.1	16136146	16138942	peak_12652	2797	+	PR_intron	rna-XM_005024955.3	LCP2	NC_040059.1	16132828	16133555	peak_13219	728	+	PR_intron	rna-XM_005024955.3
SLIT3	SLIT3	NC_040059.1	17035082	17035233	peak_12653	152	+	cds	rna-XM_027468586.1	SLIT3	NC_040059.1	16521876	16551232	peak_13220	29357	+	PR_intron	rna-XM_027468586.1
PANK3	PANK3	NC_040059.1	17052634	17052935	peak_12654	302	+	cds	rna-XM_027468242.1	PANK3	NC_040059.1	17050065	17052905	peak_13222	2841	+	PR_intron	rna-XM_027468242.1
LOC101800452	LOC101800452	NC_040059.1	17131173	17131383	peak_12655	211	+	NP_exon	rna-XR_002403931.2	LOC101800452	NC_040059.1	17139069	17139160	peak_13419	92	-	NP_intron	rna-XR_002403929.2
RARS	RARS	NC_040059.1	17142201	17142501	peak_12657	301	+	PR_intron	rna-XM_027468162.1	RARS	NC_040059.1	17140103	17140163	peak_13223	61	+	PR_intron	rna-XM_027468162.1
LOC101798009	LOC101798009	NC_040059.1	1762090	1762181	peak_12658	92	-	utr3	rna-XM_027468666.1	LOC101798009	NC_040059.1	1762390	1764176	peak_13227	1787	-	PR_intron	rna-XM_027468666.1
SERPINH1	SERPINH1	NC_040046.1	1728711	1728951	peak_1266	241	-	utr3	rna-XM_005022591.4	SERPINH1	NC_040046.1	1730506	1730776	peak_1344	271	-	utr3	rna-XM_005022591.4
EGR1	EGR1	NC_040059.1	1853563	1853744	peak_12661	182	-	utr3	rna-XM_027468454.1	EGR1	NC_040059.1	1854312	1854823	peak_13229	512	-	cds	rna-XM_027468454.1
KDM3B	KDM3B	NC_040059.1	1931500	1932918	peak_12663	1419	-	PR_intron	rna-XM_027468351.1	KDM3B	NC_040059.1	1930505	1932918	peak_13231	2414	-	PR_intron	rna-XM_027468351.1
TCERG1	TCERG1	NC_040059.1	2291747	2292465	peak_12668	719	-	PR_intron	rna-XM_027468719.1	TCERG1	NC_040059.1	2291688	2293488	peak_13237	1801	-	PR_intron	rna-XM_027468719.1
RBM27	RBM27	NC_040059.1	2357451	2358197	peak_12673	747	-	PR_intron	rna-XM_027468136.1	RBM27	NC_040059.1	2359899	2361599	peak_13241	1701	-	PR_intron	rna-XM_027468136.1
KCTD16	KCTD16	NC_040059.1	2684984	2685075	peak_12676	92	-	utr3	rna-XM_027468522.1	KCTD16	NC_040059.1	2743503	2743624	peak_13243	122	-	cds	rna-XM_027468522.1
ARHGAP26	ARHGAP26	NC_040059.1	2984107	2984437	peak_12679	331	-	utr3	rna-XM_027468466.1	ARHGAP26	NC_040059.1	2984077	2984407	peak_13244	331	-	utr3	rna-XM_027468466.1
HSPA4	HSPA4	NC_040059.1	3248968	3254702	peak_12681	5735	-	PR_intron	rna-XM_027468139.1	HSPA4	NC_040059.1	3248968	3249710	peak_13250	743	-	PR_intron	rna-XM_027468139.1
RAD50	RAD50	NC_040059.1	3475091	3481089	peak_12682	5999	-	PR_intron	rna-XM_027468667.1	RAD50	NC_040059.1	3475091	3481451	peak_13257	6361	-	PR_intron	rna-XM_027468667.1
SLC22A4	SLC22A4	NC_040059.1	3591969	3592060	peak_12684	92	-	utr3	rna-XM_027468658.1	SLC22A4	NC_040059.1	3591909	3592030	peak_13259	122	-	utr3	rna-XM_027468658.1
FSTL4	FSTL4	NC_040059.1	4077716	4077806	peak_12685	91	-	cds	rna-XM_027468512.1	FSTL4	NC_040059.1	4077298	4077687	peak_13261	390	-	cds	rna-XM_027468512.1
C14H5orf15	C14H5orf15	NC_040059.1	4485053	4485411	peak_12686	359	-	cds	rna-XM_027468458.1	C14H5orf15	NC_040059.1	4485023	4485441	peak_13262	419	-	cds	rna-XM_027468458.1
PPP2CA	PPP2CA	NC_040059.1	4654473	4655372	peak_12687	900	-	PR_intron	rna-XM_027468635.1	PPP2CA	NC_040059.1	4654473	4655372	peak_13263	900	-	PR_intron	rna-XM_027468635.1
MAP6	MAP6	NC_040046.1	1988673	1988823	peak_1269	151	-	cds	rna-XM_027466247.1	MAP6	NC_040046.1	1987034	1987154	peak_1345	121	-	utr3	rna-XM_027466247.1
PITX1	PITX1	NC_040059.1	4977945	4981648	peak_12690	3704	-	PR_intron	rna-XM_027468632.1	PITX1	NC_040059.1	4974580	4974671	peak_13265	92	-	utr3	rna-XM_027468632.1
LOC101795967	LOC101795967	NC_040059.1	5165338	5167376	peak_12691	2039	-	PR_intron	rna-XM_027468108.1	LOC101795967	NC_040059.1	5165338	5167376	peak_13267	2039	-	PR_intron	rna-XM_027468108.1
CXCL14	CXCL14	NC_040059.1	5269486	5271210	peak_12692	1725	-	PR_intron	rna-XM_027468583.1	CXCL14	NC_040059.1	5269486	5276420	peak_13268	6935	-	PR_intron	rna-XM_027468583.1
HNRNPA0	HNRNPA0	NC_040059.1	6220683	6221964	peak_12694	1282	-	cds	rna-XM_027468473.1	HNRNPA0	NC_040059.1	6220683	6221905	peak_13271	1223	-	cds	rna-XM_027468473.1
FAM13B	FAM13B	NC_040059.1	6309505	6311017	peak_12696	1513	-	PR_intron	rna-XM_027468478.1	FAM13B	NC_040059.1	6309914	6311047	peak_13273	1134	-	PR_intron	rna-XM_027468478.1
CLK4	CLK4	NC_040059.1	6603320	6610744	peak_12701	7425	-	PR_intron	rna-XM_027468435.1	CLK4	NC_040059.1	6603350	6608868	peak_13278	5519	-	PR_intron	rna-XM_027468435.1
RASGEF1C	RASGEF1C	NC_040059.1	6620825	6620976	peak_12702	152	-	utr3	rna-XM_005028669.4	RASGEF1C	NC_040059.1	6621275	6621936	peak_13279	662	-	utr3	rna-XM_005028669.4
MAPK9	MAPK9	NC_040059.1	6785445	6786973	peak_12705	1529	-	PR_intron	rna-XM_027468141.1	MAPK9	NC_040059.1	6785445	6786973	peak_13280	1529	-	PR_intron	rna-XM_027468141.1
LOC101798211	LOC101798211	NC_040059.1	6913595	6913834	peak_12707	240	-	cds	rna-XM_027468532.1	LOC101798211	NC_040059.1	6912642	6912822	peak_13282	181	-	cds	rna-XM_027468532.1
ADAMTS2	ADAMTS2	NC_040059.1	6925696	6926026	peak_12708	331	-	utr3	rna-XM_027468534.1	ADAMTS2	NC_040059.1	6925696	6926026	peak_13284	331	-	utr3	rna-XM_027468534.1
HNRNPH1	HNRNPH1	NC_040059.1	7177056	7178472	peak_12711	1417	-	PR_intron	rna-XM_005024296.4	HNRNPH1	NC_040059.1	7177056	7178651	peak_13289	1596	-	PR_intron	rna-XM_005024296.4
MGAT4B	MGAT4B	NC_040059.1	7271595	7271804	peak_12713	210	-	utr3	rna-XM_021275544.2	MGAT4B	NC_040059.1	7271595	7271833	peak_13291	239	-	utr3	rna-XM_021275544.2
MRNIP	MRNIP	NC_040059.1	7325163	7327100	peak_12714	1938	-	PR_intron	rna-XM_027468509.1	MRNIP	NC_040059.1	7325430	7327100	peak_13292	1671	-	PR_intron	rna-XM_027468509.1
TBC1D9B	TBC1D9B	NC_040059.1	7328599	7328690	peak_12715	92	-	utr3	rna-XM_027468571.1	TBC1D9B	NC_040059.1	7329765	7330065	peak_13293	301	-	cds	rna-XM_027468571.1
RNF130	RNF130	NC_040059.1	7354399	7354490	peak_12719	92	-	utr3	rna-XM_027468576.1	RNF130	NC_040059.1	7357035	7357335	peak_13296	301	-	utr3	rna-XM_027468576.1
WNT11	WNT11	NC_040046.1	2299487	2299697	peak_1272	211	-	utr3	rna-XM_005024087.4	WNT11	NC_040046.1	2303109	2303290	peak_1350	182	-	utr3	rna-XM_005024087.4
FLT4	FLT4	NC_040059.1	7409508	7409719	peak_12722	212	-	utr3	rna-XM_027468567.1	FLT4	NC_040059.1	7409359	7409719	peak_13299	361	-	utr3	rna-XM_027468567.1
PDGFRB	PDGFRB	NC_040059.1	7548274	7548455	peak_12725	182	-	utr3	rna-XM_027468639.1	PDGFRB	NC_040059.1	7548274	7549143	peak_13302	870	-	utr3	rna-XM_027468639.1
LOC113845138	LOC113845138	NC_040059.1	7614010	7614249	peak_12728	240	-	utr3	rna-XM_027468262.1	LOC113845138	NC_040059.1	7614010	7614249	peak_13304	240	-	utr3	rna-XM_027468262.1
ARSI	ARSI	NC_040059.1	7646565	7646806	peak_12730	242	-	utr3	rna-XM_027468260.1	ARSI	NC_040059.1	7645305	7645456	peak_13306	152	-	utr3	rna-XM_027468260.1
TNIP1	TNIP1	NC_040059.1	7845293	7848481	peak_12735	3189	-	PR_intron	rna-XM_027468346.1	TNIP1	NC_040059.1	7843886	7844124	peak_13309	239	-	utr3	rna-XM_027468346.1
ANXA6	ANXA6	NC_040059.1	7866297	7866418	peak_12737	122	-	utr3	rna-XM_027468431.1	ANXA6	NC_040059.1	7866327	7866388	peak_13313	62	-	utr3	rna-XM_027468431.1
CCDC69	CCDC69	NC_040059.1	7882697	7884420	peak_12739	1724	-	PR_intron	rna-XM_027468427.1	CCDC69	NC_040059.1	7882787	7884390	peak_13316	1604	-	PR_intron	rna-XM_027468427.1
THAP12	THAP12	NC_040046.1	2452967	2453597	peak_1274	631	-	cds	rna-XM_027466335.1	THAP12	NC_040046.1	2452967	2453626	peak_1352	660	-	cds	rna-XM_027466335.1
SPARC	SPARC	NC_040059.1	7992415	7992566	peak_12740	152	-	utr3	rna-XM_005010534.4	SPARC	NC_040059.1	7992415	7992566	peak_13326	152	-	utr3	rna-XM_005010534.4
FAM114A2	FAM114A2	NC_040059.1	8683832	8684341	peak_12741	510	-	utr3	rna-XM_005026191.4	FAM114A2	NC_040059.1	8683743	8684341	peak_13327	599	-	utr3	rna-XM_005026191.4
GEMIN5	GEMIN5	NC_040059.1	8977810	8977901	peak_12743	92	-	utr3	rna-XM_027468492.1	GEMIN5	NC_040059.1	8977900	8978021	peak_13330	122	-	utr3	rna-XM_027468492.1
MED7	MED7	NC_040059.1	9604282	9604814	peak_12746	533	-	cds	rna-XM_013108817.3	MED7	NC_040059.1	9604400	9604992	peak_13333	593	-	cds	rna-XM_013108817.3
ADAM19	ADAM19	NC_040059.1	9725098	9725249	peak_12748	152	-	cds	rna-XM_027468603.1	ADAM19	NC_040059.1	9722995	9723367	peak_13335	373	-	PR_intron	rna-XM_027468603.1
SOX30	SOX30	NC_040059.1	9752207	9752327	peak_12749	121	-	cds	rna-XM_005015441.3	SOX30	NC_040059.1	9752088	9752267	peak_13336	180	-	cds	rna-XM_005015441.3
CLINT1	CLINT1	NC_040059.1	9790048	9790498	peak_12751	451	-	cds	rna-XM_027468599.1	CLINT1	NC_040059.1	9790048	9790498	peak_13337	451	-	cds	rna-XM_027468599.1
EBF1	EBF1	NC_040059.1	10410269	10410330	peak_12754	62	-	utr5	rna-XM_027468385.1	EBF1	NC_040059.1	10410389	10410990	peak_13340	602	-	utr5	rna-XM_027468385.1
RNF145	RNF145	NC_040059.1	10426895	10427644	peak_12756	750	-	cds	rna-XM_005027905.4	RNF145	NC_040059.1	10426895	10429110	peak_13341	2216	-	PR_intron	rna-XM_005027905.4
KIAA1191	KIAA1191	NC_040059.1	10690382	10690563	peak_12759	182	-	utr3	rna-XM_027468713.1	KIAA1191	NC_040059.1	10690352	10690592	peak_13343	241	-	utr3	rna-XM_027468713.1
NOP16	NOP16	NC_040059.1	10708906	10710365	peak_12760	1460	-	PR_intron	rna-XM_027468445.1	NOP16	NC_040059.1	10701257	10709517	peak_13344	8261	-	PR_intron	rna-XM_027468445.1
LOC113839618	LOC113839618	NC_040059.1	10714035	10714095	peak_12762	61	-	NP_exon	gene-LOC113839618.trans	LOC113839618	NC_040059.1	10714035	10715475	peak_13346	1441	-	NP_intron	gene-LOC113839618.trans
UIMC1	UIMC1	NC_040059.1	10760434	10760614	peak_12766	181	-	utr3	rna-XM_027468071.1	UIMC1	NC_040059.1	10760464	10760524	peak_13347	61	-	utr3	rna-XM_027468071.1
LOC101797924	LOC101797924	NC_040059.1	10948331	10948537	peak_12769	207	-	utr5	rna-XM_027468197.1	LOC101797924	NC_040059.1	10948331	10948537	peak_13350	207	-	utr5	rna-XM_027468197.1
N4BP3	N4BP3	NC_040059.1	10976781	10977892	peak_12770	1112	-	cds	rna-XM_027468195.1	N4BP3	NC_040059.1	10976721	10977803	peak_13351	1083	-	cds	rna-XM_027468195.1
B4GALT7	B4GALT7	NC_040059.1	10984138	10984784	peak_12771	647	-	utr3	rna-XM_027468196.1	B4GALT7	NC_040059.1	10984138	10984615	peak_13352	478	-	utr3	rna-XM_027468196.1
DBN1	DBN1	NC_040059.1	11035241	11035422	peak_12772	182	-	cds	rna-XM_027468404.1	DBN1	NC_040059.1	11035241	11035422	peak_13353	182	-	cds	rna-XM_027468404.1
MSX2	MSX2	NC_040059.1	11298729	11298878	peak_12774	150	-	cds	rna-XM_005030637.4	MSX2	NC_040059.1	11298610	11298997	peak_13355	388	-	cds	rna-XM_005030637.4
CPEB4	CPEB4	NC_040059.1	11684807	11685286	peak_12775	480	-	cds	rna-XM_027468725.1	CPEB4	NC_040059.1	11647853	11648034	peak_13356	182	-	utr3	rna-XM_027468725.1
BNIP1	BNIP1	NC_040059.1	11945795	11945856	peak_12776	62	-	utr3	rna-XM_027468294.1	BNIP1	NC_040059.1	11945825	11946332	peak_13358	508	-	utr3	rna-XM_027468294.1
CREBRF	CREBRF	NC_040059.1	11960386	11965040	peak_12778	4655	-	PR_intron	rna-XM_027468289.1	CREBRF	NC_040059.1	11964649	11965220	peak_13360	572	-	cds	rna-XM_027468289.1
RPL26L1	RPL26L1	NC_040059.1	11986364	11989593	peak_12781	3230	-	PR_intron	rna-XM_027468292.1	RPL26L1	NC_040059.1	11986364	11989622	peak_13361	3259	-	PR_intron	rna-XM_027468292.1
ERGIC1	ERGIC1	NC_040059.1	11992002	11992153	peak_12782	152	-	utr3	rna-XM_027468291.1	ERGIC1	NC_040059.1	11992002	11992123	peak_13362	122	-	utr3	rna-XM_027468291.1
SH3PXD2B	SH3PXD2B	NC_040059.1	12223898	12224078	peak_12783	181	-	cds	rna-XM_013101026.3	SH3PXD2B	NC_040059.1	12223898	12224108	peak_13363	211	-	cds	rna-XM_013101026.3
STK10	STK10	NC_040059.1	12301800	12303375	peak_12787	1576	-	PR_intron	rna-XM_005009984.4	STK10	NC_040059.1	12302029	12302865	peak_13367	837	-	PR_intron	rna-XM_005009984.4
UBTD2	UBTD2	NC_040059.1	12355695	12356384	peak_12791	690	-	utr3	rna-XM_027468344.1	UBTD2	NC_040059.1	12355695	12356414	peak_13370	720	-	cds	rna-XM_027468344.1
SH3TC2	SH3TC2	NC_040059.1	12579944	12580155	peak_12792	212	-	utr3	rna-XM_027468527.1	SH3TC2	NC_040059.1	12579884	12580215	peak_13371	332	-	utr3	rna-XM_027468527.1
LOC101800286	LOC101800286	NC_040059.1	12630268	12630568	peak_12793	301	-	cds	rna-XM_027468699.1	LOC101800286	NC_040059.1	12629220	12629401	peak_13372	182	-	cds	rna-XM_027468699.1
PURA	PURA	NC_040059.1	12852326	12852717	peak_12798	392	-	utr3	rna-XM_027468727.1	PURA	NC_040059.1	12852296	12852627	peak_13379	332	-	utr3	rna-XM_027468727.1
LRRC32	LRRC32	NC_040046.1	2598640	2598880	peak_1280	241	-	cds	rna-XM_005024078.4	LRRC32	NC_040046.1	2598640	2598970	peak_1359	331	-	cds	rna-XM_005024078.4
PSD2	PSD2	NC_040059.1	13068719	13068959	peak_12803	241	-	cds	rna-XM_021273446.2	PSD2	NC_040059.1	13068629	13071884	peak_13383	3256	-	PR_intron	rna-XM_021273446.2
CXXC5	CXXC5	NC_040059.1	13292674	13293064	peak_12806	391	-	cds	rna-XM_027468411.1	CXXC5	NC_040059.1	13292674	13293034	peak_13388	361	-	cds	rna-XM_027468411.1
HDAC3	HDAC3	NC_040059.1	13961955	13962446	peak_12808	492	-	PR_intron	rna-XM_027468332.1	HDAC3	NC_040059.1	13961955	13962446	peak_13392	492	-	PR_intron	rna-XM_027468332.1
FCHSD1	FCHSD1	NC_040059.1	13988929	13989481	peak_12810	553	-	cds	rna-XM_027468328.1	FCHSD1	NC_040059.1	13988899	13989451	peak_13394	553	-	cds	rna-XM_027468328.1
ARAP3	ARAP3	NC_040059.1	13994714	13994864	peak_12811	151	-	utr3	rna-XM_027468307.1	ARAP3	NC_040059.1	13994863	13995671	peak_13395	809	-	utr3	rna-XM_027468307.1
PAIP2	PAIP2	NC_040059.1	14524637	14527040	peak_12818	2404	-	PR_intron	rna-XM_027468426.1	PAIP2	NC_040059.1	14526949	14527040	peak_13401	92	-	cds	rna-XM_027468425.1
MATR3	MATR3	NC_040059.1	14535071	14537906	peak_12820	2836	-	PR_intron	rna-XM_027468415.1	MATR3	NC_040059.1	14535071	14536859	peak_13403	1789	-	PR_intron	rna-XM_027468415.1
FGF18	FGF18	NC_040059.1	15333993	15352316	peak_12827	18324	-	PR_intron	rna-XM_027468581.1	FGF18	NC_040059.1	15334023	15334293	peak_13410	271	-	cds	rna-XM_027468581.1
NPM1	NPM1	NC_040059.1	15413904	15414112	peak_12829	209	-	utr3	rna-XM_027468443.1	NPM1	NC_040059.1	15413904	15414112	peak_13412	209	-	utr3	rna-XM_027468443.1
KCNIP1	KCNIP1	NC_040059.1	16073380	16073680	peak_12831	301	-	utr5	rna-XM_021275941.2	KCNIP1	NC_040059.1	16073470	16073680	peak_13414	211	-	utr5	rna-XM_021275941.2
SPDL1	SPDL1	NC_040059.1	16444837	16445828	peak_12832	992	-	PR_intron	rna-XM_027468592.1	SPDL1	NC_040059.1	16442709	16442800	peak_13415	92	-	utr3	rna-XM_027468592.1
WWC1	WWC1	NC_040059.1	17159615	17161238	peak_12836	1624	-	PR_intron	rna-XM_027468387.1	WWC1	NC_040059.1	17153352	17156431	peak_13421	3080	-	PR_intron	rna-XM_027468387.1
TENM2	TENM2	NC_040059.1	17235374	17235825	peak_12838	452	-	cds	rna-XM_027468687.1	TENM2	NC_040059.1	17235434	17235825	peak_13426	392	-	cds	rna-XM_027468687.1
CLNS1A	CLNS1A	NC_040046.1	3150899	3154195	peak_1284	3297	-	PR_intron	rna-XM_027466691.1	CLNS1A	NC_040046.1	3152595	3154225	peak_1369	1631	-	PR_intron	rna-XM_027466691.1
SCNN1G	SCNN1G	NC_040060.1	770519	770908	peak_12845	390	+	utr3	rna-XM_027468909.1	SCNN1G	NC_040060.1	770459	770729	peak_13433	271	+	utr3	rna-XM_027468909.1
UBFD1	UBFD1	NC_040060.1	857011	857249	peak_12847	239	+	utr3	rna-XM_027468739.1	UBFD1	NC_040060.1	856982	857190	peak_13435	209	+	utr3	rna-XM_027468739.1
PALB2	PALB2	NC_040060.1	895018	895288	peak_12848	271	+	cds	rna-XM_027469211.1	PALB2	NC_040060.1	894648	894960	peak_13436	313	+	PR_intron	rna-XM_027469211.1
RSF1	RSF1	NC_040046.1	3169435	3180549	peak_1285	11115	-	PR_intron	rna-XM_027466716.1	RSF1	NC_040046.1	3169315	3173929	peak_1370	4615	-	PR_intron	rna-XM_027466716.1
ARHGAP17	ARHGAP17	NC_040060.1	1248589	1266321	peak_12854	17733	+	PR_intron	rna-XM_027468742.1	ARHGAP17	NC_040060.1	1248589	1270229	peak_13442	21641	+	PR_intron	rna-XM_027468742.1
PGP	PGP	NC_040060.1	1369042	1369312	peak_12856	271	+	utr3	rna-XM_027468861.1	PGP	NC_040060.1	1369072	1369342	peak_13444	271	+	utr3	rna-XM_027468861.1
PKD1	PKD1	NC_040060.1	1487235	1487446	peak_12857	212	+	utr5	rna-XM_027468934.1	PKD1	NC_040060.1	1487235	1487446	peak_13445	212	+	utr5	rna-XM_027468934.1
4e1b498d-bcf5-4742-9885-576c809b4f19	4e1b498d-bcf5-4742-9885-576c809b4f19	NC_040060.1	1569365	1569785	peak_12860	421	+	NP_exon	4e1b498d-bcf5-4742-9885-576c809b4f19.trans	4e1b498d-bcf5-4742-9885-576c809b4f19	NC_040060.1	1568766	1568946	peak_13450	181	+	NP_exon	4e1b498d-bcf5-4742-9885-576c809b4f19.trans
NTHL1	NTHL1	NC_040060.1	1606275	1606766	peak_12864	492	+	PR_intron	rna-XM_027468932.1	NTHL1	NC_040060.1	1606245	1606796	peak_13456	552	+	PR_intron	rna-XM_027468932.1
ZNF598	ZNF598	NC_040060.1	1671258	1674593	peak_12866	3336	+	PR_intron	rna-XM_027468849.1	ZNF598	NC_040060.1	1671258	1674563	peak_13458	3306	+	PR_intron	rna-XM_027468849.1
HS3ST6	HS3ST6	NC_040060.1	1818471	1818622	peak_12871	152	+	cds	rna-XM_027469145.1	HS3ST6	NC_040060.1	1818262	1818861	peak_13461	600	+	cds	rna-XM_027469145.1
SOX8	SOX8	NC_040060.1	2195378	2195857	peak_12872	480	+	utr5	rna-XM_027469126.1	SOX8	NC_040060.1	2195797	2195917	peak_13465	121	+	cds	rna-XM_027469126.1
CACNA1H	CACNA1H	NC_040060.1	2674764	2675124	peak_12877	361	+	cds	rna-XM_027469434.1	CACNA1H	NC_040060.1	2674644	2675154	peak_13470	511	+	cds	rna-XM_027469434.1
SHMT1	SHMT1	NC_040060.1	2906388	2906449	peak_12882	62	+	cds	rna-XM_027469421.1	SHMT1	NC_040060.1	2906358	2906539	peak_13477	182	+	cds	rna-XM_027469421.1
TOP3A	TOP3A	NC_040060.1	2923229	2925063	peak_12883	1835	+	PR_intron	rna-XM_027469424.1	TOP3A	NC_040060.1	2923229	2925033	peak_13478	1805	+	PR_intron	rna-XM_027469424.1
FLII	FLII	NC_040060.1	2937234	2937325	peak_12885	92	+	cds	rna-XM_027469435.1	FLII	NC_040060.1	2937204	2937427	peak_13480	224	+	cds	rna-XM_027469435.1
TOM1L2	TOM1L2	NC_040060.1	3019339	3036513	peak_12889	17175	+	PR_intron	rna-XM_027468835.1	TOM1L2	NC_040060.1	3052510	3056729	peak_13484	4220	+	PR_intron	rna-XM_027468839.1
NARS2	NARS2	NC_040046.1	3413848	3414029	peak_1289	182	-	utr3	rna-XM_027466828.1	NARS2	NC_040046.1	3413848	3414059	peak_1374	212	-	utr3	rna-XM_027466828.1
PEMT	PEMT	NC_040060.1	3204393	3204573	peak_12891	181	+	utr3	rna-XM_027468913.1	PEMT	NC_040060.1	3204334	3204603	peak_13488	270	+	utr3	rna-XM_027468913.1
RASD1	RASD1	NC_040060.1	3213611	3214028	peak_12892	418	+	utr3	rna-XM_005011225.4	RASD1	NC_040060.1	3213552	3213879	peak_13489	328	+	utr3	rna-XM_005011225.4
COPS3	COPS3	NC_040060.1	3256436	3256647	peak_12893	212	+	utr3	rna-XM_013099441.3	COPS3	NC_040060.1	3256436	3256647	peak_13490	212	+	utr3	rna-XM_013099441.3
FLCN	FLCN	NC_040060.1	3268630	3268809	peak_12894	180	+	cds	rna-XM_027468945.1	FLCN	NC_040060.1	3268600	3268750	peak_13491	151	+	cds	rna-XM_027468945.1
DHRS7B	DHRS7B	NC_040060.1	3487627	3487688	peak_12896	62	+	cds	rna-XM_027469151.1	DHRS7B	NC_040060.1	3487657	3487718	peak_13495	62	+	cds	rna-XM_027469151.1
LOC101803171	LOC101803171	NC_040060.1	3571410	3571590	peak_12898	181	+	utr5	rna-XM_013098325.3	LOC101803171	NC_040060.1	3596480	3596660	peak_13496	181	+	cds	rna-XM_013098325.3
MTMR2	MTMR2	NC_040046.1	10952952	10953012	peak_129	61	+	PR_intron	rna-XM_027467706.1	MTMR2	NC_040046.1	10904595	10904745	peak_1403	151	-	cds	rna-XM_027467706.1
b344a914-2ecc-41e1-9231-0cb6f1e2c92d	b344a914-2ecc-41e1-9231-0cb6f1e2c92d	NC_040046.1	3527789	3528256	peak_1290	468	-	NP_exon	b344a914-2ecc-41e1-9231-0cb6f1e2c92d.trans	b344a914-2ecc-41e1-9231-0cb6f1e2c92d	NC_040046.1	3527789	3528286	peak_1375	498	-	NP_exon	b344a914-2ecc-41e1-9231-0cb6f1e2c92d.trans
PTCD1	PTCD1	NC_040060.1	3660876	3661026	peak_12903	151	+	cds	rna-XM_027469439.1	PTCD1	NC_040060.1	3659167	3659644	peak_13497	478	+	cds	rna-XM_027469439.1
PDAP1	PDAP1	NC_040060.1	3663841	3670087	peak_12904	6247	+	PR_intron	rna-XM_027468825.1	PDAP1	NC_040060.1	3663841	3670087	peak_13499	6247	+	PR_intron	rna-XM_027468825.1
SMURF1	SMURF1	NC_040060.1	3785449	3785510	peak_12906	62	+	cds	rna-XM_027469164.1	SMURF1	NC_040060.1	3784048	3785510	peak_13501	1463	+	PR_intron	rna-XM_027469164.1
RNF216	RNF216	NC_040060.1	3800080	3803606	peak_12908	3527	+	PR_intron	rna-XM_013100160.3	RNF216	NC_040060.1	3800110	3803636	peak_13502	3527	+	PR_intron	rna-XM_013100160.3
ACTB	ACTB	NC_040060.1	3898683	3898922	peak_12912	240	+	utr3	rna-NM_001310421.1	ACTB	NC_040060.1	3898654	3898892	peak_13506	239	+	utr3	rna-NM_001310421.1
FBXL18	FBXL18	NC_040060.1	3904264	3905341	peak_12915	1078	+	PR_intron	rna-XM_027469575.1	FBXL18	NC_040060.1	3904234	3905371	peak_13509	1138	+	PR_intron	rna-XM_027469575.1
TNRC18	TNRC18	NC_040060.1	3974644	3974735	peak_12919	92	+	cds	rna-XM_027469078.1	TNRC18	NC_040060.1	3975064	3975125	peak_13513	62	+	cds	rna-XM_027469078.1
MMD2	MMD2	NC_040060.1	4072285	4072375	peak_12929	91	+	utr3	rna-XM_027469156.1	MMD2	NC_040060.1	4072285	4072346	peak_13522	62	+	utr3	rna-XM_027469156.1
CARD11	CARD11	NC_040060.1	4725078	4726469	peak_12931	1392	+	PR_intron	rna-XM_005020113.4	CARD11	NC_040060.1	4724839	4725049	peak_13523	211	+	cds	rna-XM_005020113.4
GNA12	GNA12	NC_040060.1	4799800	4800370	peak_12936	571	+	cds	rna-XM_021272856.2	GNA12	NC_040060.1	4799830	4800460	peak_13526	631	+	cds	rna-XM_021272856.2
IQCE	IQCE	NC_040060.1	4855086	4861174	peak_12938	6089	+	PR_intron	rna-XM_027468988.1	IQCE	NC_040060.1	4855146	4861736	peak_13528	6591	+	PR_intron	rna-XM_027468988.1
TENM4	TENM4	NC_040046.1	3726972	3732348	peak_1294	5377	-	PR_intron	rna-XM_027466836.1	TENM4	NC_040046.1	3542323	3542534	peak_1377	212	-	cds	rna-XM_027466836.1
TTYH3	TTYH3	NC_040060.1	4883042	4883251	peak_12940	210	+	NP_exon	rna-XR_003500669.1	TTYH3	NC_040060.1	4883042	4883251	peak_13530	210	+	NP_exon	rna-XR_003500669.1
SNX8	SNX8	NC_040060.1	5135588	5137020	peak_12942	1433	+	PR_intron	rna-XM_027469047.1	SNX8	NC_040060.1	5135558	5136583	peak_13532	1026	+	PR_intron	rna-XM_027469047.1
MAD1L1	MAD1L1	NC_040060.1	5154187	5160988	peak_12943	6802	+	PR_intron	rna-XM_027469054.1	MAD1L1	NC_040060.1	5152117	5153650	peak_13533	1534	+	PR_intron	rna-XM_027469054.1
MAFK	MAFK	NC_040060.1	5688102	5688283	peak_12949	182	+	PR_intron	rna-XM_027469246.1	MAFK	NC_040060.1	5688072	5688163	peak_13539	92	+	PR_intron	rna-XM_027469246.1
PICALM	PICALM	NC_040046.1	5706361	5706601	peak_1295	241	-	utr3	rna-XM_027466931.1	PICALM	NC_040046.1	5706241	5706571	peak_1382	331	-	utr3	rna-XM_027466928.1
INTS1	INTS1	NC_040060.1	5726896	5727467	peak_12952	572	+	NP_exon	rna-XR_003500721.1	INTS1	NC_040060.1	5726896	5727497	peak_13542	602	+	NP_exon	rna-XR_003500721.1
MICALL2	MICALL2	NC_040060.1	5755477	5758960	peak_12953	3484	+	PR_intron	rna-XM_005020087.3	MICALL2	NC_040060.1	5752721	5758960	peak_13543	6240	+	PR_intron	rna-XM_005020087.3
C15H7orf50	C15H7orf50	NC_040060.1	5931557	5989985	peak_12954	58429	+	PR_intron	rna-XM_027468889.1	C15H7orf50	NC_040060.1	5931557	5989955	peak_13544	58399	+	PR_intron	rna-XM_027468889.1
LOC101803908	LOC101803908	NC_040060.1	6115376	6115615	peak_12958	240	+	utr3	rna-XM_027468897.1	LOC101803908	NC_040060.1	6115346	6115466	peak_13548	121	+	utr3	rna-XM_027468897.1
PRKAR1B	PRKAR1B	NC_040060.1	6264140	6264782	peak_12959	643	+	PR_intron	rna-XM_027469234.1	PRKAR1B	NC_040060.1	6264111	6264297	peak_13549	187	+	utr5	rna-XM_027469234.1
PCF11	PCF11	NC_040046.1	5860561	5860622	peak_1296	62	-	utr5	rna-XM_027466975.1	PCF11	NC_040046.1	5860442	5860711	peak_1383	270	-	utr5	rna-XM_027466975.1
PDGFA	PDGFA	NC_040060.1	6386398	6386699	peak_12960	302	+	utr5	rna-XM_027468879.1	PDGFA	NC_040060.1	6386398	6386669	peak_13550	272	+	utr5	rna-XM_027468879.1
TECPR1	TECPR1	NC_040060.1	7473559	7475644	peak_12965	2086	+	PR_intron	rna-XM_027469289.1	TECPR1	NC_040060.1	7473709	7475644	peak_13556	1936	+	PR_intron	rna-XM_027469289.1
LOC101803972	LOC101803972	NC_040060.1	7583665	7585554	peak_12967	1890	+	PR_intron	rna-XM_013100088.3	LOC101803972	NC_040060.1	7583665	7585554	peak_13558	1890	+	PR_intron	rna-XM_013100088.3
AIMP2	AIMP2	NC_040060.1	7664446	7664653	peak_12968	208	+	cds	rna-XM_027469310.1	AIMP2	NC_040060.1	7664416	7664624	peak_13559	209	+	cds	rna-XM_027469310.1
USP42	USP42	NC_040060.1	7683256	7683347	peak_12969	92	+	PR_intron	rna-XM_027469284.1	USP42	NC_040060.1	7697119	7698588	peak_13560	1470	+	cds	rna-XM_027469284.1
DDIAS	DDIAS	NC_040046.1	5945727	5945788	peak_1297	62	-	cds	rna-XM_005026067.3	DDIAS	NC_040046.1	5945816	5945996	peak_1384	181	-	cds	rna-XM_005026067.3
LOC101799791	LOC101799791	NC_040060.1	7916981	7917072	peak_12975	92	+	NP_exon	rna-XR_003500783.1	LOC101799791	NC_040060.1	7913319	7916017	peak_13846	2699	-	NP_intron	rna-XR_003500783.1
CDR2	CDR2	NC_040060.1	7925152	7925213	peak_12976	62	+	cds	rna-XM_027469550.1	CDR2	NC_040060.1	7916981	7927809	peak_13563	10829	+	PR_intron	rna-XM_027469550.1
DCUN1D3	DCUN1D3	NC_040060.1	8261914	8264878	peak_12979	2965	+	PR_intron	rna-XM_021271650.2	DCUN1D3	NC_040060.1	8261974	8264728	peak_13565	2755	+	PR_intron	rna-XM_021271650.2
DLG2	DLG2	NC_040046.1	6079177	6079238	peak_1298	62	-	utr3	rna-XM_027462540.1	DLG2	NC_040046.1	6079147	6079298	peak_1385	152	-	utr3	rna-XM_027462540.1
ERI2	ERI2	NC_040060.1	8291608	8291758	peak_12980	151	+	cds	rna-XM_027469446.1	ERI2	NC_040060.1	8287710	8287893	peak_13566	184	+	PR_intron	rna-XM_027469446.1
THUMPD1	THUMPD1	NC_040060.1	8306766	8306885	peak_12983	120	+	cds	rna-XM_021271645.2	THUMPD1	NC_040060.1	8306736	8306856	peak_13569	121	+	cds	rna-XM_021271645.2
GPRC5B	GPRC5B	NC_040060.1	8551257	8555928	peak_12985	4672	+	PR_intron	rna-XM_027468815.1	GPRC5B	NC_040060.1	8555177	8555958	peak_13572	782	+	cds	rna-XM_027468816.1
IQCK	IQCK	NC_040060.1	8562155	8562336	peak_12986	182	+	PR_intron	rna-XM_027468821.1	IQCK	NC_040060.1	8562155	8562336	peak_13573	182	+	PR_intron	rna-XM_027468821.1
KNOP1	KNOP1	NC_040060.1	8610412	8611591	peak_12988	1180	+	PR_intron	rna-XM_027468804.1	KNOP1	NC_040060.1	8610353	8611621	peak_13575	1269	+	PR_intron	rna-XM_027468804.1
COQ7	COQ7	NC_040060.1	8752964	8755430	peak_12990	2467	+	PR_intron	rna-XM_005018557.3	COQ7	NC_040060.1	8753165	8755430	peak_13578	2266	+	PR_intron	rna-XM_005018557.3
ITPRIPL2	ITPRIPL2	NC_040060.1	8775662	8775902	peak_12991	241	+	cds	rna-XM_021271599.2	ITPRIPL2	NC_040060.1	8775691	8775902	peak_13579	212	+	cds	rna-XM_021271599.2
CLEC19A	CLEC19A	NC_040060.1	8837865	8837954	peak_12996	90	+	utr3	rna-XM_027468962.1	CLEC19A	NC_040060.1	8837865	8837954	peak_13581	90	+	utr3	rna-XM_027468962.1
SMG1	SMG1	NC_040060.1	8920208	8920299	peak_12997	92	+	cds	rna-XM_027468829.1	SMG1	NC_040060.1	8874840	8874931	peak_13582	92	+	utr5	rna-XM_027468829.1
ARHGAP42	ARHGAP42	NC_040046.1	12992274	12992365	peak_130	92	+	utr5	rna-XM_027467817.1	ARHGAP42	NC_040046.1	12992274	12992455	peak_130	182	+	utr5	rna-XM_027467817.1
RPS15A	RPS15A	NC_040060.1	8951581	8952942	peak_13000	1362	+	PR_intron	rna-XM_027468984.1	RPS15A	NC_040060.1	8951581	8952942	peak_13588	1362	+	PR_intron	rna-XM_027468984.1
LOC101804322	LOC101804322	NC_040060.1	9668116	9668827	peak_13001	712	+	PR_intron	rna-XM_027468842.1	LOC101804322	NC_040060.1	9668116	9668827	peak_13589	712	+	PR_intron	rna-XM_027468842.1
LOC101802999	LOC101802999	NC_040060.1	9743848	9744265	peak_13002	418	+	PR_intron	rna-XM_027469321.1	LOC101802999	NC_040060.1	9686904	9688377	peak_13867	1474	-	PR_intron	rna-XM_027469322.1
MYH11	MYH11	NC_040060.1	9761245	9761426	peak_13003	182	+	cds	rna-XM_027469317.1	MYH11	NC_040060.1	9761215	9761366	peak_13590	152	+	cds	rna-XM_027469317.1
MARF1	MARF1	NC_040060.1	9838389	9839846	peak_13009	1458	+	PR_intron	rna-XM_027469000.1	MARF1	NC_040060.1	9838359	9839846	peak_13594	1488	+	PR_intron	rna-XM_027469000.1
PDXDC1	PDXDC1	NC_040060.1	9948641	9949885	peak_13011	1245	+	PR_intron	rna-XM_027469009.1	PDXDC1	NC_040060.1	9948671	9949885	peak_13595	1215	+	PR_intron	rna-XM_027469009.1
SNX29	SNX29	NC_040060.1	10092738	10103940	peak_13016	11203	+	PR_intron	rna-XM_005018445.4	SNX29	NC_040060.1	10094118	10103970	peak_13598	9853	+	PR_intron	rna-XM_005018445.4
LOC101797192	LOC101797192	NC_040060.1	10765093	10766665	peak_13018	1573	+	PR_intron	rna-XM_027468780.1	LOC101797192	NC_040060.1	10765063	10766635	peak_13601	1573	+	PR_intron	rna-XM_027468780.1
KIAA0556	KIAA0556	NC_040060.1	10955586	10957381	peak_13019	1796	+	PR_intron	rna-XM_027468766.1	KIAA0556	NC_040060.1	10954053	10957351	peak_13602	3299	+	PR_intron	rna-XM_027468766.1
MPG	MPG	NC_040060.1	11067668	11067997	peak_13023	330	+	cds	rna-XM_005028501.4	MPG	NC_040060.1	11067698	11068027	peak_13606	330	+	cds	rna-XM_005028501.4
2c500aa2-3ad4-407f-8451-b9b10a7215af	2c500aa2-3ad4-407f-8451-b9b10a7215af	NC_040060.1	11131342	11131459	peak_13024	118	+	NP_exon	2c500aa2-3ad4-407f-8451-b9b10a7215af.trans	2c500aa2-3ad4-407f-8451-b9b10a7215af	NC_040060.1	11131313	11131459	peak_13607	147	+	NP_exon	2c500aa2-3ad4-407f-8451-b9b10a7215af.trans
AXIN1	AXIN1	NC_040060.1	11194799	11195188	peak_13026	390	+	cds	rna-XM_027468900.1	AXIN1	NC_040060.1	11195068	11195158	peak_13608	91	+	cds	rna-XM_027468900.1
3b5775ab-0d48-4254-ab10-1ac40451410d	3b5775ab-0d48-4254-ab10-1ac40451410d	NC_040060.1	11403584	11404004	peak_13030	421	+	NP_exon	3b5775ab-0d48-4254-ab10-1ac40451410d.trans	3b5775ab-0d48-4254-ab10-1ac40451410d	NC_040060.1	11403614	11403974	peak_13614	361	+	NP_exon	3b5775ab-0d48-4254-ab10-1ac40451410d.trans
NAA60	NAA60	NC_040060.1	11418740	11418800	peak_13032	61	+	cds	rna-XM_027468750.1	NAA60	NC_040060.1	11403811	11404421	peak_13616	611	+	PR_intron	rna-XM_027468751.1
UBALD1	UBALD1	NC_040060.1	11479195	11480011	peak_13034	817	+	PR_intron	rna-XM_027469074.1	UBALD1	NC_040060.1	11479195	11479981	peak_13619	787	+	PR_intron	rna-XM_027469074.1
DNAJA3	DNAJA3	NC_040060.1	11880678	11884438	peak_13036	3761	+	PR_intron	rna-XM_027468788.1	DNAJA3	NC_040060.1	11880678	11884467	peak_13621	3790	+	PR_intron	rna-XM_027468788.1
C15H16orf71	C15H16orf71	NC_040060.1	12021598	12021749	peak_13037	152	+	cds	rna-XM_027469354.1	C15H16orf71	NC_040060.1	12021598	12021869	peak_13622	272	+	cds	rna-XM_027469354.1
XPO6	XPO6	NC_040060.1	12165832	12166072	peak_13039	241	+	cds	rna-XM_027469380.1	XPO6	NC_040060.1	12165832	12166212	peak_13624	381	+	cds	rna-XM_027469380.1
RAB11FIP3	RAB11FIP3	NC_040060.1	12199749	12199900	peak_13041	152	+	cds	rna-XM_027469384.1	RAB11FIP3	NC_040060.1	12199689	12199990	peak_13626	302	+	cds	rna-XM_027469384.1
351f6293-e745-4ec9-ae4b-5e46dc989e90	351f6293-e745-4ec9-ae4b-5e46dc989e90	NC_040060.1	12258910	12259240	peak_13043	331	+	NP_exon	351f6293-e745-4ec9-ae4b-5e46dc989e90.trans	351f6293-e745-4ec9-ae4b-5e46dc989e90	NC_040060.1	12258861	12259240	peak_13628	380	+	NP_exon	351f6293-e745-4ec9-ae4b-5e46dc989e90.trans
LOC101798226	LOC101798226	NC_040060.1	12266398	12271462	peak_13045	5065	+	PR_intron	rna-XM_027469385.1	LOC101798226	NC_040060.1	12266398	12271462	peak_13629	5065	+	PR_intron	rna-XM_027469385.1
ddd49086-cb75-4bd5-aa4a-ee2067e2e237	ddd49086-cb75-4bd5-aa4a-ee2067e2e237	NC_040060.1	12339748	12340018	peak_13046	271	+	NP_exon	ddd49086-cb75-4bd5-aa4a-ee2067e2e237.trans	ddd49086-cb75-4bd5-aa4a-ee2067e2e237	NC_040060.1	12339778	12340047	peak_13637	270	+	NP_exon	ddd49086-cb75-4bd5-aa4a-ee2067e2e237.trans
RHOT2	RHOT2	NC_040060.1	12340214	12340334	peak_13048	121	+	utr5	rna-XM_027469387.1	RHOT2	NC_040060.1	12340243	12341389	peak_13639	1147	+	PR_intron	rna-XM_027469387.1
STUB1	STUB1	NC_040060.1	12357970	12358178	peak_13049	209	+	cds	rna-XM_027469403.1	STUB1	NC_040060.1	12357970	12358178	peak_13640	209	+	cds	rna-XM_027469403.1
METRN	METRN	NC_040060.1	12387853	12388781	peak_13051	929	+	utr3	rna-XM_027469390.1	METRN	NC_040060.1	12387704	12388781	peak_13642	1078	+	utr3	rna-XM_027469390.1
SPSB3	SPSB3	NC_040060.1	12428629	12429019	peak_13052	391	+	cds	rna-XM_027469400.1	SPSB3	NC_040060.1	12428629	12428989	peak_13643	361	+	cds	rna-XM_027469400.1
TEDC2	TEDC2	NC_040060.1	12825206	12826089	peak_13054	884	+	PR_intron	rna-XM_027469410.1	TEDC2	NC_040060.1	12825176	12826089	peak_13644	914	+	PR_intron	rna-XM_027469410.1
PPL	PPL	NC_040060.1	13273267	13274557	peak_13056	1291	+	PR_intron	rna-XM_027468758.1	PPL	NC_040060.1	13280860	13281595	peak_13648	736	+	PR_intron	rna-XM_027468758.1
b939c825-b2cc-4eb4-8997-f192976480a5	b939c825-b2cc-4eb4-8997-f192976480a5	NC_040060.1	13284248	13284608	peak_13057	361	+	NP_exon	b939c825-b2cc-4eb4-8997-f192976480a5.trans	b939c825-b2cc-4eb4-8997-f192976480a5	NC_040060.1	13284278	13284668	peak_13649	391	+	NP_exon	b939c825-b2cc-4eb4-8997-f192976480a5.trans
FZD4	FZD4	NC_040046.1	7373258	7373498	peak_1306	241	-	utr3	rna-XM_005027767.4	FZD4	NC_040046.1	7373288	7373528	peak_1390	241	-	utr3	rna-XM_005027767.4
TBC1D24	TBC1D24	NC_040060.1	13329343	13329463	peak_13065	121	+	cds	rna-XM_027468967.1	TBC1D24	NC_040060.1	13328865	13329016	peak_13657	152	+	cds	rna-XM_027468967.1
ATP6V0C	ATP6V0C	NC_040060.1	13354786	13354877	peak_13066	92	+	utr5	rna-XM_027469134.1	ATP6V0C	NC_040060.1	13354756	13354817	peak_13659	62	+	utr5	rna-XM_027469134.1
LOC101799012	LOC101799012	NC_040060.1	13379361	13380551	peak_13067	1191	+	NP_intron	rna-XR_003500699.1	LOC101799012	NC_040060.1	13382794	13382975	peak_13662	182	+	NP_exon	rna-XR_003500699.1
RNPS1	RNPS1	NC_040060.1	13438912	13439644	peak_13074	733	+	PR_intron	rna-XM_027469573.1	RNPS1	NC_040060.1	13438882	13439644	peak_13667	763	+	PR_intron	rna-XM_027469573.1
59d9bf83-a4f9-4994-b7aa-bd578b1bbc3a	59d9bf83-a4f9-4994-b7aa-bd578b1bbc3a	NC_040060.1	13441609	13441849	peak_13075	241	+	NP_exon	59d9bf83-a4f9-4994-b7aa-bd578b1bbc3a.trans	59d9bf83-a4f9-4994-b7aa-bd578b1bbc3a	NC_040060.1	13441609	13441879	peak_13668	271	+	NP_exon	59d9bf83-a4f9-4994-b7aa-bd578b1bbc3a.trans
TELO2	TELO2	NC_040060.1	13458686	13458867	peak_13077	182	+	utr3	rna-XM_027469466.1	TELO2	NC_040060.1	13458656	13458867	peak_13670	212	+	utr3	rna-XM_027469466.1
IFT140	IFT140	NC_040060.1	13480578	13480757	peak_13078	180	+	PR_intron	rna-XM_027469572.1	IFT140	NC_040060.1	13480222	13480549	peak_13671	328	+	PR_intron	rna-XM_027469572.1
CTSC	CTSC	NC_040046.1	7885368	7885606	peak_1308	239	-	cds	rna-XM_027467131.1	CTSC	NC_040046.1	7885368	7885636	peak_1392	269	-	cds	rna-XM_027467131.1
CRAMP1	CRAMP1	NC_040060.1	13538305	13540796	peak_13080	2492	+	PR_intron	rna-XM_027468937.1	CRAMP1	NC_040060.1	13538365	13551863	peak_13673	13499	+	PR_intron	rna-XM_027468936.1
TMEM186	TMEM186	NC_040060.1	13652446	13652687	peak_13086	242	+	cds	rna-XM_027469498.1	TMEM186	NC_040060.1	13652446	13652687	peak_13679	242	+	cds	rna-XM_027469498.1
C15H16orf72	C15H16orf72	NC_040060.1	16001551	16001788	peak_13090	238	+	cds	rna-XM_027468911.1	C15H16orf72	NC_040060.1	16001551	16001758	peak_13683	208	+	cds	rna-XM_027468911.1
CLEC16A	CLEC16A	NC_040060.1	17156574	17157144	peak_13093	571	+	cds	rna-XM_027469467.1	CLEC16A	NC_040060.1	17156604	17157084	peak_13685	481	+	cds	rna-XM_027469467.1
SNN	SNN	NC_040060.1	17513016	17513196	peak_13094	181	+	cds	rna-XM_027469471.1	SNN	NC_040060.1	17512897	17513226	peak_13686	330	+	cds	rna-XM_027469471.1
PARN	PARN	NC_040060.1	17603650	17604065	peak_13095	416	+	PR_intron	rna-XM_027468869.1	PARN	NC_040060.1	17603650	17604065	peak_13689	416	+	PR_intron	rna-XM_027468869.1
UNKL	UNKL	NC_040060.1	143126	144091	peak_13099	966	-	PR_intron	rna-XM_027469108.1	UNKL	NC_040060.1	143096	144091	peak_13693	996	-	PR_intron	rna-XM_027469108.1
YAP1	YAP1	NC_040046.1	13728891	13730186	peak_131	1296	+	PR_intron	rna-XM_027467978.1	YAP1	NC_040046.1	13728891	13730216	peak_131	1326	+	PR_intron	rna-XM_027467978.1
GNPTG	GNPTG	NC_040060.1	190163	192624	peak_13100	2462	-	PR_intron	rna-XM_027469118.1	GNPTG	NC_040060.1	189478	192234	peak_13694	2757	-	PR_intron	rna-XM_027469118.1
UBE2I	UBE2I	NC_040060.1	222303	222613	peak_13101	311	-	PR_intron	rna-XM_027469122.1	UBE2I	NC_040060.1	222274	222672	peak_13695	399	-	PR_intron	rna-XM_027469122.1
IL4R	IL4R	NC_040060.1	345171	345291	peak_13102	121	-	utr3	rna-XM_027469096.1	IL4R	NC_040060.1	345111	345381	peak_13696	271	-	utr3	rna-XM_027469096.1
USP31	USP31	NC_040060.1	738513	738694	peak_13105	182	-	cds	rna-XM_027468908.1	USP31	NC_040060.1	738513	738694	peak_13701	182	-	cds	rna-XM_027468908.1
COG7	COG7	NC_040060.1	803818	804087	peak_13108	270	-	utr3	rna-XM_027469043.1	COG7	NC_040060.1	803848	804057	peak_13704	210	-	utr3	rna-XM_027469043.1
TNRC6A	TNRC6A	NC_040060.1	920666	920816	peak_13109	151	-	cds	rna-XM_027469216.1	TNRC6A	NC_040060.1	920606	920816	peak_13706	211	-	cds	rna-XM_027469216.1
CHORDC1	CHORDC1	NC_040046.1	8588170	8590512	peak_1311	2343	-	PR_intron	rna-XM_005030902.4	CHORDC1	NC_040046.1	8588140	8588747	peak_1393	608	-	PR_intron	rna-XM_005030902.4
RBBP6	RBBP6	NC_040060.1	1015769	1018979	peak_13116	3211	-	cds	rna-XM_027469568.1	RBBP6	NC_040060.1	1015769	1018949	peak_13712	3181	-	cds	rna-XM_027469568.1
PRKCB	PRKCB	NC_040060.1	1139953	1147638	peak_13121	7686	-	PR_intron	rna-XM_027469429.1	PRKCB	NC_040060.1	1139893	1147638	peak_13717	7746	-	PR_intron	rna-XM_027469429.1
E4F1	E4F1	NC_040060.1	1359212	1359541	peak_13122	330	-	cds	rna-XM_027468857.1	E4F1	NC_040060.1	1359212	1359541	peak_13719	330	-	cds	rna-XM_027468857.1
TSC2	TSC2	NC_040060.1	1573235	1573472	peak_13124	238	-	utr3	rna-XM_027468927.1	TSC2	NC_040060.1	1573176	1573501	peak_13722	326	-	utr3	rna-XM_027468927.1
7d9f1e31-63a9-4e0b-8146-dcf3f18d18db	7d9f1e31-63a9-4e0b-8146-dcf3f18d18db	NC_040060.1	1574414	1574651	peak_13126	238	-	NP_exon	7d9f1e31-63a9-4e0b-8146-dcf3f18d18db.trans	7d9f1e31-63a9-4e0b-8146-dcf3f18d18db	NC_040060.1	1574414	1574681	peak_13724	268	-	NP_exon	7d9f1e31-63a9-4e0b-8146-dcf3f18d18db.trans
SLC9A3R2	SLC9A3R2	NC_040060.1	1614992	1617162	peak_13132	2171	-	PR_intron	rna-XM_027468929.1	SLC9A3R2	NC_040060.1	1614992	1617162	peak_13730	2171	-	PR_intron	rna-XM_027468929.1
GFER	GFER	NC_040060.1	1713700	1713821	peak_13133	122	-	cds	rna-XM_027469094.1	GFER	NC_040060.1	1713551	1713791	peak_13732	241	-	cds	rna-XM_027469094.1
NDUFB10	NDUFB10	NC_040060.1	1746278	1746367	peak_13134	90	-	cds	rna-XM_027469130.1	NDUFB10	NC_040060.1	1746278	1746367	peak_13733	90	-	cds	rna-XM_027469130.1
FAHD1	FAHD1	NC_040060.1	1853188	1853395	peak_13136	208	-	utr3	rna-XM_005031863.4	FAHD1	NC_040060.1	1853512	1853660	peak_13735	149	-	cds	rna-XM_005031863.4
CIAO3	CIAO3	NC_040060.1	1871703	1872031	peak_13138	329	-	cds	rna-XM_027468972.1	CIAO3	NC_040060.1	1871763	1872592	peak_13737	830	-	PR_intron	rna-XM_027468972.1
RPUSD1	RPUSD1	NC_040060.1	1918911	1919151	peak_13139	241	-	utr3	rna-XM_027469038.1	RPUSD1	NC_040060.1	1918911	1919121	peak_13739	211	-	utr3	rna-XM_027469038.1
SMCO4	SMCO4	NC_040046.1	10198801	10198890	peak_1314	90	-	utr3	rna-XM_027467358.1	SMCO4	NC_040046.1	10198860	10199217	peak_1395	358	-	cds	rna-XM_027467358.1
LMF1	LMF1	NC_040060.1	1971418	1971509	peak_13142	92	-	utr3	rna-XM_027468731.1	LMF1	NC_040060.1	1971328	1971659	peak_13741	332	-	utr3	rna-XM_027468731.1
EPN2	EPN2	NC_040060.1	2782141	2782501	peak_13144	361	-	cds	rna-XM_027469256.1	EPN2	NC_040060.1	2780465	2780526	peak_13744	62	-	utr3	rna-XM_027469256.1
SMCR8	SMCR8	NC_040060.1	2910229	2910530	peak_13147	302	-	utr3	rna-XM_027469425.1	SMCR8	NC_040060.1	2910229	2910650	peak_13750	422	-	utr3	rna-XM_027469425.1
TAF1D	TAF1D	NC_040046.1	10300129	10300368	peak_1315	240	-	cds	rna-XM_027467373.1	TAF1D	NC_040046.1	10300099	10300368	peak_1396	270	-	cds	rna-XM_027467373.1
MIEF2	MIEF2	NC_040060.1	2928100	2928190	peak_13151	91	-	cds	rna-XM_027469426.1	MIEF2	NC_040060.1	2927804	2927894	peak_13754	91	-	utr3	rna-XM_027469426.1
ALKBH5	ALKBH5	NC_040060.1	2954043	2954134	peak_13153	92	-	utr3	rna-XM_027468970.1	ALKBH5	NC_040060.1	2957744	2959607	peak_13756	1864	-	PR_intron	rna-XM_027468970.1
DRG2	DRG2	NC_040060.1	2980971	2981411	peak_13157	441	-	utr3	rna-XM_027469095.1	DRG2	NC_040060.1	2980971	2981868	peak_13758	898	-	PR_intron	rna-XM_027469095.1
GID4	GID4	NC_040060.1	2991964	2992204	peak_13159	241	-	utr3	rna-XM_027469031.1	GID4	NC_040060.1	2990258	2990379	peak_13760	122	-	utr3	rna-XM_027469031.1
MRE11	MRE11	NC_040046.1	10492969	10498172	peak_1316	5204	-	PR_intron	rna-XM_013093296.3	MRE11	NC_040046.1	10492939	10498231	peak_1398	5293	-	PR_intron	rna-XM_013093296.3
RAI1	RAI1	NC_040060.1	3085285	3085646	peak_13160	362	-	cds	rna-XM_027468885.1	RAI1	NC_040060.1	3085255	3085616	peak_13762	362	-	cds	rna-XM_027468885.1
MED9	MED9	NC_040060.1	3216514	3216754	peak_13163	241	-	utr3	rna-XM_005011224.4	MED9	NC_040060.1	3216454	3216754	peak_13767	301	-	utr3	rna-XM_005011224.4
NT5M	NT5M	NC_040060.1	3237818	3237999	peak_13165	182	-	utr3	rna-XM_005011227.4	NT5M	NC_040060.1	3237818	3238029	peak_13769	212	-	utr3	rna-XM_005011227.4
MPRIP	MPRIP	NC_040060.1	3280528	3280649	peak_13169	122	-	utr3	rna-XM_027468941.1	MPRIP	NC_040060.1	3277022	3277143	peak_13772	122	-	utr3	rna-XM_027468941.1
CWC15	CWC15	NC_040046.1	10656273	10671769	peak_1317	15497	-	PR_intron	rna-XM_005012845.4	CWC15	NC_040046.1	10656892	10669901	peak_1399	13010	-	PR_intron	rna-XM_005012845.4
USP22	USP22	NC_040060.1	3364785	3365381	peak_13176	597	-	utr3	rna-XM_027469146.1	USP22	NC_040060.1	3364785	3365411	peak_13785	627	-	utr3	rna-XM_027469146.1
TMEM11	TMEM11	NC_040060.1	3491397	3491989	peak_13178	593	-	cds	rna-XM_027469154.1	TMEM11	NC_040060.1	3491397	3491959	peak_13787	563	-	cds	rna-XM_027469154.1
SESN3	SESN3	NC_040046.1	10713004	10714710	peak_1318	1707	-	PR_intron	rna-XM_027467669.1	SESN3	NC_040046.1	10713004	10714740	peak_1401	1737	-	PR_intron	rna-XM_027467669.1
NATD1	NATD1	NC_040060.1	3501858	3502366	peak_13180	509	-	utr3	rna-XM_027469155.1	NATD1	NC_040060.1	3502067	3502276	peak_13789	210	-	utr3	rna-XM_027469155.1
CPSF4	CPSF4	NC_040060.1	3650043	3651839	peak_13184	1797	-	PR_intron	rna-XM_027468822.1	CPSF4	NC_040060.1	3650043	3651839	peak_13793	1797	-	PR_intron	rna-XM_027468822.1
WIPI2	WIPI2	NC_040060.1	4032680	4032859	peak_13185	180	-	utr3	rna-XM_027469083.1	WIPI2	NC_040060.1	4032680	4032859	peak_13796	180	-	utr3	rna-XM_027469083.1
FOXK1	FOXK1	NC_040060.1	4111247	4111728	peak_13186	482	-	utr3	rna-XM_027469492.1	FOXK1	NC_040060.1	4111247	4111698	peak_13798	452	-	utr3	rna-XM_027469492.1
SDK1	SDK1	NC_040060.1	4251241	4251542	peak_13189	302	-	utr3	rna-XM_027469547.1	SDK1	NC_040060.1	4251211	4251602	peak_13802	392	-	cds	rna-XM_027469547.1
FAM76B	FAM76B	NC_040046.1	10878168	10881320	peak_1319	3153	-	PR_intron	rna-XM_027467682.1	FAM76B	NC_040046.1	10877940	10881291	peak_1402	3352	-	PR_intron	rna-XM_027467682.1
BRAT1	BRAT1	NC_040060.1	4841203	4841531	peak_13190	329	-	cds	rna-XM_027468985.1	BRAT1	NC_040060.1	4841025	4841531	peak_13807	507	-	cds	rna-XM_027468985.1
LFNG	LFNG	NC_040060.1	4979652	4979802	peak_13191	151	-	utr5	rna-XM_027468992.1	LFNG	NC_040060.1	4979652	4979802	peak_13808	151	-	utr5	rna-XM_027468992.1
8ae066b4-fde0-4674-9755-e143357eff6f	8ae066b4-fde0-4674-9755-e143357eff6f	NC_040060.1	5073203	5073653	peak_13192	451	-	NP_exon	8ae066b4-fde0-4674-9755-e143357eff6f.trans	8ae066b4-fde0-4674-9755-e143357eff6f	NC_040060.1	5073323	5073653	peak_13809	331	-	NP_exon	8ae066b4-fde0-4674-9755-e143357eff6f.trans
CHST12	CHST12	NC_040060.1	5080423	5080514	peak_13196	92	-	utr5	rna-XM_027469092.1	CHST12	NC_040060.1	5080393	5080514	peak_13813	122	-	utr5	rna-XM_027469092.1
EIF3B	EIF3B	NC_040060.1	5099695	5101472	peak_13197	1778	-	PR_intron	rna-XM_027469441.1	EIF3B	NC_040060.1	5099695	5101502	peak_13814	1808	-	PR_intron	rna-XM_027469441.1
BIRC2	BIRC2	NC_040046.1	13769157	13769695	peak_132	539	+	cds	rna-XM_027468019.1	BIRC2	NC_040046.1	13766165	13766285	peak_133	121	+	utr5	rna-XM_027468019.1
MAML2	MAML2	NC_040046.1	10984610	10984821	peak_1320	212	-	utr3	rna-XM_027467739.1	MAML2	NC_040046.1	10984550	10984761	peak_1404	212	-	utr3	rna-XM_027467739.1
ELFN1	ELFN1	NC_040060.1	5526757	5569295	peak_13202	42539	-	PR_intron	rna-XM_027469064.1	ELFN1	NC_040060.1	5523716	5523955	peak_13817	240	-	utr3	rna-XM_027469064.1
GET4	GET4	NC_040060.1	6186943	6187152	peak_13214	210	-	utr3	rna-XM_027468896.1	GET4	NC_040060.1	6186943	6187152	peak_13827	210	-	utr3	rna-XM_027468896.1
FAM20C	FAM20C	NC_040060.1	6646084	6646264	peak_13215	181	-	cds	rna-XM_027468939.1	FAM20C	NC_040060.1	6646054	6646294	peak_13829	241	-	cds	rna-XM_027468939.1
TRRAP	TRRAP	NC_040060.1	7148774	7148835	peak_13218	62	-	utr3	rna-XM_027469274.1	TRRAP	NC_040060.1	7148744	7148805	peak_13831	62	-	utr3	rna-XM_027469274.1
LMTK2	LMTK2	NC_040060.1	7504487	7506587	peak_13223	2101	-	PR_intron	rna-XM_027469283.1	LMTK2	NC_040060.1	7508348	7508558	peak_13833	211	-	cds	rna-XM_027469283.1
LOC101803177	LOC101803177	NC_040060.1	7631628	7632199	peak_13226	572	-	PR_intron	rna-XM_027469297.1	LOC101803177	NC_040060.1	7631628	7632259	peak_13835	632	-	PR_intron	rna-XM_027469297.1
PMS2	PMS2	NC_040060.1	7650684	7651809	peak_13229	1126	-	PR_intron	rna-XM_027469301.1	PMS2	NC_040060.1	7650684	7651987	peak_13837	1304	-	PR_intron	rna-XM_027469301.1
EIF2AK1	EIF2AK1	NC_040060.1	7676051	7677287	peak_13232	1237	-	PR_intron	rna-XM_027469304.1	EIF2AK1	NC_040060.1	7673357	7673536	peak_13839	180	-	cds	rna-XM_027469304.1
CYTH3	CYTH3	NC_040060.1	7708718	7716094	peak_13233	7377	-	PR_intron	rna-XM_027469306.1	CYTH3	NC_040060.1	7715015	7716094	peak_13841	1080	-	PR_intron	rna-XM_027469308.1
LOC101802178	LOC101802178	NC_040060.1	7775611	7775942	peak_13236	332	-	utr3	rna-XM_021272808.2	LOC101802178	NC_040060.1	7771716	7771837	peak_13844	122	-	utr3	rna-XM_021272808.2
POLR3E	POLR3E	NC_040060.1	7931194	7933765	peak_13240	2572	-	PR_intron	rna-XM_005018536.4	POLR3E	NC_040060.1	7931135	7933735	peak_13849	2601	-	PR_intron	rna-XM_005018536.4
EEF2K	EEF2K	NC_040060.1	7965751	7968068	peak_13243	2318	-	PR_intron	rna-XM_005018534.4	EEF2K	NC_040060.1	7965781	7966678	peak_13851	898	-	PR_intron	rna-XM_005018534.4
MOSMO	MOSMO	NC_040060.1	8071322	8071742	peak_13245	421	-	utr3	rna-XM_027469565.1	MOSMO	NC_040060.1	8071082	8071771	peak_13852	690	-	utr3	rna-XM_027469565.1
TMEM159	TMEM159	NC_040060.1	8165229	8166725	peak_13246	1497	-	PR_intron	rna-XM_027468917.1	TMEM159	NC_040060.1	8165199	8166575	peak_13854	1377	-	PR_intron	rna-XM_027468917.1
LYRM1	LYRM1	NC_040060.1	8238024	8239308	peak_13247	1285	-	PR_intron	rna-XM_005018513.4	LYRM1	NC_040060.1	8238024	8239338	peak_13855	1315	-	PR_intron	rna-XM_005018513.4
PGR	PGR	NC_040046.1	13212984	13213283	peak_1325	300	-	cds	rna-XM_027467832.1	PGR	NC_040046.1	13212955	13213283	peak_1410	329	-	cds	rna-XM_027467832.1
LOC101792571	LOC101792571	NC_040060.1	8346448	8347224	peak_13250	777	-	PR_intron	rna-XM_027468808.1	LOC101792571	NC_040060.1	8346239	8346479	peak_13856	241	-	utr3	rna-XM_027468808.1
CCP110	CCP110	NC_040060.1	8691813	8693452	peak_13252	1640	-	PR_intron	rna-XM_005018476.3	CCP110	NC_040060.1	8691813	8693752	peak_13858	1940	-	PR_intron	rna-XM_005018476.3
TMC5	TMC5	NC_040060.1	8721871	8724126	peak_13255	2256	-	PR_intron	rna-XM_027468801.1	TMC5	NC_040060.1	8736565	8737166	peak_13860	602	-	PR_intron	rna-XM_027468798.1
XYLT1	XYLT1	NC_040060.1	9122254	9122435	peak_13257	182	-	cds	rna-XM_027469333.1	XYLT1	NC_040060.1	9122254	9129322	peak_13861	7069	-	PR_intron	rna-XM_027469333.1
LOC101803902	LOC101803902	NC_040060.1	9635542	9635753	peak_13260	212	-	utr3	rna-XM_027468847.1	LOC101803902	NC_040060.1	9635542	9635723	peak_13864	182	-	utr3	rna-XM_027468847.1
C15H16orf45	C15H16orf45	NC_040060.1	9871408	9871469	peak_13263	62	-	utr3	rna-XM_027469015.1	C15H16orf45	NC_040060.1	9871229	9871499	peak_13871	271	-	utr3	rna-XM_027469015.1
RSL1D1	RSL1D1	NC_040060.1	10008756	10008935	peak_13266	180	-	cds	rna-XM_027469019.1	RSL1D1	NC_040060.1	10008756	10008935	peak_13874	180	-	cds	rna-XM_027469019.1
GSPT1	GSPT1	NC_040060.1	10019997	10020117	peak_13269	121	-	utr3	rna-XM_027469502.1	GSPT1	NC_040060.1	10022149	10022269	peak_13877	121	-	utr3	rna-XM_027469502.1
CPPED1	CPPED1	NC_040060.1	10280278	10290850	peak_13272	10573	-	PR_intron	rna-XM_021271601.2	CPPED1	NC_040060.1	10242245	10260494	peak_13878	18250	-	PR_intron	rna-XM_027469476.1
POLR3K	POLR3K	NC_040060.1	10991857	10992063	peak_13276	207	-	utr3	rna-XM_027468779.1	POLR3K	NC_040060.1	10991857	10992034	peak_13883	178	-	utr3	rna-XM_027468779.1
RHBDF1	RHBDF1	NC_040060.1	10996535	10996685	peak_13277	151	-	utr3	rna-XM_027468769.1	RHBDF1	NC_040060.1	10996475	10996715	peak_13884	241	-	utr3	rna-XM_027468769.1
FAM234A	FAM234A	NC_040060.1	11304541	11304966	peak_13279	426	-	PR_intron	rna-XM_027469539.1	FAM234A	NC_040060.1	11304511	11304966	peak_13886	456	-	PR_intron	rna-XM_027469539.1
LUC7L	LUC7L	NC_040060.1	11314271	11320901	peak_13280	6631	-	PR_intron	rna-XM_027469542.1	LUC7L	NC_040060.1	11311611	11314183	peak_13887	2573	-	PR_intron	rna-XM_027469542.1
CLCN7	CLCN7	NC_040060.1	11360398	11366301	peak_13281	5904	-	PR_intron	rna-XM_027469033.1	CLCN7	NC_040060.1	11366121	11366301	peak_13889	181	-	cds	rna-XM_027469033.1
NUDT16L1	NUDT16L1	NC_040060.1	11424191	11424517	peak_13282	327	-	utr3	rna-XM_027468757.1	NUDT16L1	NC_040060.1	11424191	11424547	peak_13890	357	-	cds	rna-XM_027468757.1
2b82faa7-1dac-4838-ae8e-aa9733be6d47	2b82faa7-1dac-4838-ae8e-aa9733be6d47	NC_040060.1	11506860	11507220	peak_13283	361	-	NP_exon	2b82faa7-1dac-4838-ae8e-aa9733be6d47.trans	2b82faa7-1dac-4838-ae8e-aa9733be6d47	NC_040060.1	11506860	11507250	peak_13892	391	-	NP_exon	2b82faa7-1dac-4838-ae8e-aa9733be6d47.trans
LOC101802288	LOC101802288	NC_040060.1	11507718	11507985	peak_13286	268	-	cds	rna-XM_027468906.1	LOC101802288	NC_040060.1	11511852	11512087	peak_13896	236	-	PR_intron	rna-XM_027468906.1
SLX4	SLX4	NC_040060.1	11518277	11518547	peak_13287	271	-	utr3	rna-XM_027468905.1	SLX4	NC_040060.1	11518277	11518487	peak_13897	211	-	utr3	rna-XM_027468905.1
e4b3cdd1-b969-4726-ad39-6142bc1448a0	e4b3cdd1-b969-4726-ad39-6142bc1448a0	NC_040060.1	11582123	11582273	peak_13291	151	-	NP_exon	e4b3cdd1-b969-4726-ad39-6142bc1448a0.trans	e4b3cdd1-b969-4726-ad39-6142bc1448a0	NC_040060.1	11583080	11583261	peak_13904	182	-	NP_exon	e4b3cdd1-b969-4726-ad39-6142bc1448a0.trans
CREBBP	CREBBP	NC_040060.1	11588378	11592806	peak_13299	4429	-	PR_intron	rna-XM_027468853.1	CREBBP	NC_040060.1	11588378	11592806	peak_13910	4429	-	PR_intron	rna-XM_027468853.1
TMEM123	TMEM123	NC_040046.1	13782818	13783118	peak_1330	301	-	utr3	rna-XM_027468029.1	TMEM123	NC_040046.1	13782878	13783207	peak_1412	330	-	utr3	rna-XM_027468029.1
ADCY9	ADCY9	NC_040060.1	11702829	11704025	peak_13303	1197	-	cds	rna-XM_027468855.1	ADCY9	NC_040060.1	11702829	11703965	peak_13914	1137	-	cds	rna-XM_027468855.1
SRL	SRL	NC_040060.1	11796462	11797152	peak_13307	691	-	utr3	rna-XM_027469028.1	SRL	NC_040060.1	11795922	11796133	peak_13919	212	-	utr3	rna-XM_027469028.1
148f3c4a-a2a0-44d7-a588-4cba0712917a	148f3c4a-a2a0-44d7-a588-4cba0712917a	NC_040060.1	11819425	11819673	peak_13311	249	-	NP_exon	148f3c4a-a2a0-44d7-a588-4cba0712917a.trans	148f3c4a-a2a0-44d7-a588-4cba0712917a	NC_040060.1	11819425	11819673	peak_13924	249	-	NP_exon	148f3c4a-a2a0-44d7-a588-4cba0712917a.trans
TFAP4	TFAP4	NC_040060.1	11819880	11819941	peak_13313	62	-	cds	rna-XM_027469139.1	TFAP4	NC_040060.1	11819910	11821282	peak_13926	1373	-	PR_intron	rna-XM_027469139.1
CLUAP1	CLUAP1	NC_040060.1	11910280	11954444	peak_13314	44165	-	PR_intron	rna-XM_027468783.1	CLUAP1	NC_040060.1	11910191	11954444	peak_13927	44254	-	PR_intron	rna-XM_027468783.1
ANKS3	ANKS3	NC_040060.1	12005017	12006057	peak_13315	1041	-	PR_intron	rna-XM_005022102.4	ANKS3	NC_040060.1	12004987	12006117	peak_13928	1131	-	PR_intron	rna-XM_005022102.4
SBK1	SBK1	NC_040060.1	12120560	12121010	peak_13316	451	-	utr3	rna-XM_027469395.1	SBK1	NC_040060.1	12120560	12121040	peak_13929	481	-	cds	rna-XM_027469395.1
DCUN1D5	DCUN1D5	NC_040046.1	14033611	14033791	peak_1332	181	-	utr3	rna-XM_027468113.1	DCUN1D5	NC_040046.1	14033581	14033821	peak_1414	241	-	utr3	rna-XM_027468113.1
NTN3	NTN3	NC_040060.1	12554869	12555199	peak_13320	331	-	cds	rna-XM_027469461.1	NTN3	NC_040060.1	12534464	12534734	peak_13933	271	-	cds	rna-XM_027469461.1
LOC113845281	LOC113845281	NC_040060.1	12586356	12586445	peak_13322	90	-	cds	rna-XM_027469414.1	LOC113845281	NC_040060.1	12585884	12585944	peak_13936	61	-	cds	rna-XM_027469414.1
LOC101801820	LOC101801820	NC_040060.1	12622764	12622915	peak_13324	152	-	utr3	rna-XM_027469361.1	LOC101801820	NC_040060.1	12624922	12625252	peak_13939	331	-	utr3	rna-XM_027469361.1
VRK3	VRK3	NC_040060.1	12893350	12893558	peak_13326	209	-	utr3	rna-XM_027468965.1	VRK3	NC_040060.1	12893350	12893528	peak_13941	179	-	utr3	rna-XM_027468965.1
WFIKKN1	WFIKKN1	NC_040060.1	12947491	12947640	peak_13327	150	-	cds	rna-XM_027468955.1	WFIKKN1	NC_040060.1	12947343	12947906	peak_13942	564	-	cds	rna-XM_027468955.1
RAB40C	RAB40C	NC_040060.1	12954678	12954769	peak_13328	92	-	utr3	rna-XM_027468957.1	RAB40C	NC_040060.1	12954261	12954351	peak_13943	91	-	utr3	rna-XM_027468957.1
PDGFD	PDGFD	NC_040046.1	14395892	14395982	peak_1333	91	-	cds	rna-XM_027465069.1	PDGFD	NC_040046.1	14395892	14396011	peak_1415	120	-	cds	rna-XM_027465069.1
PIGQ	PIGQ	NC_040060.1	12989706	12989767	peak_13331	62	-	utr3	rna-XM_027469463.1	PIGQ	NC_040060.1	12993005	12993246	peak_13946	242	-	utr3	rna-XM_027469463.1
UBN1	UBN1	NC_040060.1	13288496	13288707	peak_13334	212	-	utr3	rna-XM_027468759.1	UBN1	NC_040060.1	13290113	13290473	peak_13949	361	-	utr3	rna-XM_027468759.1
MSANTD4	MSANTD4	NC_040046.1	15313608	15314058	peak_1334	451	-	cds	rna-XM_027468247.1	MSANTD4	NC_040046.1	15313548	15314058	peak_1416	511	-	cds	rna-XM_027468247.1
METTL22	METTL22	NC_040060.1	13727913	13730109	peak_13340	2197	-	PR_intron	rna-XM_027469045.1	METTL22	NC_040060.1	13719673	13719823	peak_13955	151	-	utr3	rna-XM_027469045.1
RBFOX1	RBFOX1	NC_040060.1	14738738	14738799	peak_13341	62	-	cds	rna-XM_027469180.1	RBFOX1	NC_040060.1	14738679	14742942	peak_13957	4264	-	PR_intron	rna-XM_027469180.1
GLYR1	GLYR1	NC_040060.1	15709285	15709466	peak_13342	182	-	utr3	rna-XM_027468923.1	GLYR1	NC_040060.1	15709315	15709436	peak_13958	122	-	utr3	rna-XM_027468923.1
MAPK8IP3	MAPK8IP3	NC_040060.1	15744038	15745658	peak_13346	1621	-	PR_intron	rna-XM_027469591.1	MAPK8IP3	NC_040060.1	15744038	15745352	peak_13960	1315	-	PR_intron	rna-XM_027469591.1
USP7	USP7	NC_040060.1	15872378	15872439	peak_13351	62	-	utr3	rna-XM_021267643.2	USP7	NC_040060.1	15890028	15890089	peak_13964	62	-	cds	rna-XM_021267643.2
EMP2	EMP2	NC_040060.1	16870621	16870772	peak_13353	152	-	utr3	rna-XM_027469526.1	EMP2	NC_040060.1	16870591	16870772	peak_13968	182	-	utr3	rna-XM_027469526.1
SOCS1	SOCS1	NC_040060.1	17237060	17237506	peak_13355	447	-	cds	rna-XM_027468952.1	SOCS1	NC_040060.1	17237090	17237476	peak_13970	387	-	cds	rna-XM_027468952.1
TXNDC11	TXNDC11	NC_040060.1	17515678	17516337	peak_13356	660	-	cds	rna-XM_027469473.1	TXNDC11	NC_040060.1	17515528	17517174	peak_13971	1647	-	PR_intron	rna-XM_027469473.1
MRTFB	MRTFB	NC_040060.1	17762882	17762973	peak_13357	92	-	utr3	rna-XM_027469512.1	MRTFB	NC_040060.1	17762882	17763033	peak_13974	152	-	utr3	rna-XM_027469512.1
AACS	AACS	NC_040061.1	58144	68296	peak_13364	10153	+	PR_intron	rna-XM_027469896.1	AACS	NC_040061.1	58203	68266	peak_13979	10064	+	PR_intron	rna-XM_027469896.1
TMEM132B	TMEM132B	NC_040061.1	376300	376541	peak_13365	242	+	cds	rna-XM_013098082.3	TMEM132B	NC_040061.1	376270	376541	peak_13980	272	+	cds	rna-XM_013098082.3
TMEM132C	TMEM132C	NC_040061.1	833907	834028	peak_13368	122	+	PR_intron	rna-XM_027469970.1	TMEM132C	NC_040061.1	833877	834238	peak_13981	362	+	PR_intron	rna-XM_027469970.1
FZD10	FZD10	NC_040061.1	1506811	1507022	peak_13371	212	+	cds	rna-XM_005018070.4	FZD10	NC_040061.1	1506811	1507142	peak_13988	332	+	cds	rna-XM_005018070.4
SFSWAP	SFSWAP	NC_040061.1	2281136	2281555	peak_13373	420	+	cds	rna-XM_005018084.4	SFSWAP	NC_040061.1	2281166	2281525	peak_13993	360	+	cds	rna-XM_005018084.4
ULK1	ULK1	NC_040061.1	2440029	2440240	peak_13378	212	+	utr5	rna-XM_027470198.1	ULK1	NC_040061.1	2439849	2440240	peak_14001	392	+	utr5	rna-XM_027470198.1
PUS1	PUS1	NC_040061.1	2528304	2530225	peak_13381	1922	+	PR_intron	rna-XM_027470199.1	PUS1	NC_040061.1	2528334	2530225	peak_14005	1892	+	PR_intron	rna-XM_027470199.1
LOC101798137	LOC101798137	NC_040061.1	2559465	2565824	peak_13384	6360	+	PR_intron	rna-XM_027470301.1	LOC101798137	NC_040061.1	2559226	2561965	peak_14009	2740	+	PR_intron	rna-XM_027470301.1
NOC4L	NOC4L	NC_040061.1	2605762	2606112	peak_13389	351	+	PR_intron	rna-XM_027470023.1	NOC4L	NC_040061.1	2605624	2605793	peak_14015	170	+	PR_intron	rna-XM_027470023.1
GUCY1A2	GUCY1A2	NC_040046.1	15649666	15649905	peak_1339	240	-	cds	rna-XM_027468318.1	GUCY1A2	NC_040046.1	15649666	15649905	peak_1420	240	-	cds	rna-XM_027468318.1
FBRSL1	FBRSL1	NC_040061.1	3345094	3533275	peak_13391	188182	+	PR_intron	rna-XM_027469956.1	FBRSL1	NC_040061.1	3345184	3533305	peak_14017	188122	+	PR_intron	rna-XM_027469956.1
CHFR	CHFR	NC_040061.1	3908683	3909033	peak_13396	351	+	PR_intron	rna-XM_027469874.1	CHFR	NC_040061.1	3908653	3909063	peak_14022	411	+	PR_intron	rna-XM_027469874.1
GOLGA3	GOLGA3	NC_040061.1	3985939	3987329	peak_13397	1391	+	NP_intron	rna-XR_003500916.1	GOLGA3	NC_040061.1	3985819	3987329	peak_14024	1511	+	NP_intron	rna-XR_003500916.1
DYNC2H1	DYNC2H1	NC_040046.1	14106053	14108272	peak_134	2220	+	PR_intron	rna-XM_027468128.1	DYNC2H1	NC_040046.1	14103421	14108242	peak_137	4822	+	PR_intron	rna-XM_027468128.1
CWF19L2	CWF19L2	NC_040046.1	15859455	15869841	peak_1340	10387	-	PR_intron	rna-XM_027468340.1	CWF19L2	NC_040046.1	15859455	15869811	peak_1421	10357	-	PR_intron	rna-XM_027468340.1
ANKLE2	ANKLE2	NC_040061.1	4012711	4013072	peak_13403	362	+	cds	rna-XM_027470180.1	ANKLE2	NC_040061.1	4012681	4013072	peak_14029	392	+	cds	rna-XM_027470180.1
TRMT2A	TRMT2A	NC_040061.1	4184697	4185172	peak_13406	476	+	cds	rna-XM_027470247.1	TRMT2A	NC_040061.1	4184875	4185113	peak_14031	239	+	cds	rna-XM_027470247.1
ARVCF	ARVCF	NC_040061.1	4260749	4361238	peak_13409	100490	+	PR_intron	rna-XM_027469839.1	ARVCF	NC_040061.1	4261066	4361238	peak_14032	100173	+	PR_intron	rna-XM_027469839.1
TBX1	TBX1	NC_040061.1	4659101	4659251	peak_13414	151	+	PR_intron	rna-XM_027469854.1	TBX1	NC_040061.1	4659101	4659280	peak_14037	180	+	PR_intron	rna-XM_027469854.1
CLDN5	CLDN5	NC_040061.1	4945095	4945156	peak_13415	62	+	cds	rna-XM_027469976.1	CLDN5	NC_040061.1	4945036	4945186	peak_14038	151	+	cds	rna-XM_027469976.1
UFD1	UFD1	NC_040061.1	4982640	4983143	peak_13416	504	+	PR_intron	rna-XM_027469632.1	UFD1	NC_040061.1	4982640	4983232	peak_14040	593	+	PR_intron	rna-XM_027469632.1
LOC101789430	LOC101789430	NC_040061.1	4988629	4988987	peak_13417	359	+	utr5	rna-XM_027469624.1	LOC101789430	NC_040061.1	4988748	4988957	peak_14041	210	+	utr5	rna-XM_027469624.1
PPIL2	PPIL2	NC_040061.1	5093335	5095389	peak_13420	2055	+	PR_intron	rna-XM_027469631.1	PPIL2	NC_040061.1	5095208	5095389	peak_14044	182	+	utr3	rna-XM_027469631.1
YDJC	YDJC	NC_040061.1	5358148	5358417	peak_13421	270	+	cds	rna-XM_027469858.1	YDJC	NC_040061.1	5358148	5358387	peak_14045	240	+	cds	rna-XM_027469858.1
HIC2	HIC2	NC_040061.1	5433566	5500004	peak_13423	66439	+	PR_intron	rna-XM_021273496.2	HIC2	NC_040061.1	5433566	5499944	peak_14046	66379	+	PR_intron	rna-XM_021273496.2
SNAP29	SNAP29	NC_040061.1	5673205	5673265	peak_13429	61	+	cds	rna-XM_005021166.4	SNAP29	NC_040061.1	5673175	5673235	peak_14055	61	+	cds	rna-XM_005021166.4
ALKBH8	ALKBH8	NC_040046.1	15942606	15942697	peak_1343	92	-	cds	rna-XM_027468357.1	ALKBH8	NC_040046.1	15942516	15942996	peak_1424	481	-	cds	rna-XM_027468357.1
CLTCL1	CLTCL1	NC_040061.1	5722944	5723462	peak_13430	519	+	PR_intron	rna-XM_027469928.1	CLTCL1	NC_040061.1	5732303	5732484	peak_14056	182	+	utr3	rna-XM_027469928.1
CHCHD10	CHCHD10	NC_040061.1	5878087	5878267	peak_13432	181	+	utr3	rna-XM_027470012.1	CHCHD10	NC_040061.1	5878093	5878752	peak_14250	660	-	PR_intron	rna-XM_027470012.1
LOC101796050	LOC101796050	NC_040061.1	5942199	5942739	peak_13433	541	+	utr3	rna-XM_005023524.3	LOC101796050	NC_040061.1	5942229	5942440	peak_14061	212	+	utr3	rna-XM_005023524.3
DDX51	DDX51	NC_040061.1	6004908	6006088	peak_13434	1181	+	PR_intron	rna-XM_027470072.1	DDX51	NC_040061.1	6004908	6006088	peak_14063	1181	+	PR_intron	rna-XM_027470072.1
CABIN1	CABIN1	NC_040061.1	6052101	6053839	peak_13437	1739	+	PR_intron	rna-XM_027470068.1	CABIN1	NC_040061.1	6052101	6054313	peak_14066	2213	+	PR_intron	rna-XM_027470068.1
MED15	MED15	NC_040061.1	6242620	6248936	peak_13442	6317	+	PR_intron	rna-XM_027470099.1	MED15	NC_040061.1	6242620	6248965	peak_14070	6346	+	PR_intron	rna-XM_027470099.1
LRRC75B	LRRC75B	NC_040061.1	6398026	6398117	peak_13444	92	+	utr3	rna-XM_027470091.1	LRRC75B	NC_040061.1	6398386	6398686	peak_14074	301	+	utr3	rna-XM_027470091.1
GUCD1	GUCD1	NC_040061.1	6423252	6423372	peak_13446	121	+	utr3	rna-XM_027470095.1	GUCD1	NC_040061.1	6423193	6423283	peak_14075	91	+	utr3	rna-XM_027470095.1
LOC101796956	LOC101796956	NC_040061.1	6935213	6937367	peak_13447	2155	+	NP_intron	rna-XR_001194022.3	LOC101796956	NC_040061.1	6940857	6941098	peak_14077	242	+	NP_intron	rna-XR_001194022.3
PISD	PISD	NC_040061.1	6987769	6987950	peak_13451	182	+	PR_intron	rna-XM_027469709.1	PISD	NC_040061.1	6983409	6983932	peak_14080	524	+	PR_intron	rna-XM_027469708.1
EIF4ENIF1	EIF4ENIF1	NC_040061.1	7026532	7027160	peak_13452	629	+	PR_intron	rna-XM_027469719.1	EIF4ENIF1	NC_040061.1	7026532	7027160	peak_14082	629	+	PR_intron	rna-XM_027469719.1
PATZ1	PATZ1	NC_040061.1	7061797	7061888	peak_13455	92	+	utr5	rna-XM_027470045.1	PATZ1	NC_040061.1	7062186	7062336	peak_14085	151	+	utr5	rna-XM_027470045.1
PIK3IP1	PIK3IP1	NC_040061.1	7094714	7096787	peak_13458	2074	+	PR_intron	rna-XM_027470048.1	PIK3IP1	NC_040061.1	7094524	7096816	peak_14088	2293	+	PR_intron	rna-XM_027470048.1
C16H12orf43	C16H12orf43	NC_040061.1	7146610	7147882	peak_13459	1273	+	PR_intron	rna-XM_027470050.1	C16H12orf43	NC_040061.1	7146639	7147882	peak_14089	1244	+	PR_intron	rna-XM_027470050.1
SLN	SLN	NC_040046.1	16060033	16061524	peak_1346	1492	-	PR_intron	rna-XM_005025925.3	SLN	NC_040046.1	16059975	16061466	peak_1425	1492	-	PR_intron	rna-XM_005025925.3
SPPL3	SPPL3	NC_040061.1	7175860	7176011	peak_13461	152	+	utr5	rna-XM_027470106.1	SPPL3	NC_040061.1	7175860	7176011	peak_14091	152	+	utr5	rna-XM_027470106.1
POP5	POP5	NC_040061.1	7320487	7321244	peak_13463	758	+	PR_intron	rna-XM_027469995.1	POP5	NC_040061.1	7322519	7322936	peak_14093	418	+	PR_intron	rna-XM_027469994.1
COQ5	COQ5	NC_040061.1	7360489	7360758	peak_13465	270	+	utr3	rna-XM_027469996.1	COQ5	NC_040061.1	7360459	7360728	peak_14094	270	+	utr3	rna-XM_027469996.1
TRIAP1	TRIAP1	NC_040061.1	7369928	7371012	peak_13466	1085	+	utr3	rna-XM_005026714.4	TRIAP1	NC_040061.1	7369928	7370982	peak_14095	1055	+	utr3	rna-XM_005026714.4
MSI1	MSI1	NC_040061.1	7445211	7445272	peak_13467	62	+	utr3	rna-XM_027469864.1	MSI1	NC_040061.1	7445570	7445661	peak_14096	92	+	utr3	rna-XM_027469864.1
LOC101789739	LOC101789739	NC_040046.1	16232179	16233365	peak_1347	1187	-	PR_intron	rna-XM_027468490.1	LOC101789739	NC_040046.1	16233095	16233365	peak_1426	271	-	cds	rna-XM_027468490.1
LOC101790047	LOC101790047	NC_040061.1	7453096	7454400	peak_13470	1305	+	PR_intron	rna-XM_027469868.1	LOC101790047	NC_040061.1	7453156	7456769	peak_14098	3614	+	PR_intron	rna-XM_027469868.1
PXN	PXN	NC_040061.1	7470640	7493744	peak_13471	23105	+	PR_intron	rna-XM_027469861.1	PXN	NC_040061.1	7470640	7470701	peak_14099	62	+	utr5	rna-XM_027469861.1
GCN1	GCN1	NC_040061.1	7531247	7532067	peak_13474	821	+	PR_intron	rna-XM_027469902.1	GCN1	NC_040061.1	7531450	7532176	peak_14102	727	+	PR_intron	rna-XM_027469902.1
RAB35	RAB35	NC_040061.1	7576007	7577364	peak_13476	1358	+	PR_intron	rna-XM_027469920.1	RAB35	NC_040061.1	7576096	7577394	peak_14105	1299	+	PR_intron	rna-XM_027469920.1
CIT	CIT	NC_040061.1	7656820	7658312	peak_13478	1493	+	PR_intron	rna-XM_027469911.1	CIT	NC_040061.1	7655553	7658282	peak_14106	2730	+	PR_intron	rna-XM_027469911.1
TAOK3	TAOK3	NC_040061.1	7951781	7961425	peak_13483	9645	+	PR_intron	rna-XM_027470278.1	TAOK3	NC_040061.1	7951781	7986639	peak_14112	34859	+	PR_intron	rna-XM_027470278.1
TPCN1	TPCN1	NC_040061.1	8099093	8100332	peak_13486	1240	+	PR_intron	rna-XM_005030046.4	TPCN1	NC_040061.1	8063036	8063127	peak_14117	92	+	utr5	rna-XM_027470316.1
PLBD2	PLBD2	NC_040061.1	8110990	8111171	peak_13487	182	+	utr3	rna-XM_027470203.1	PLBD2	NC_040061.1	8110990	8111171	peak_14119	182	+	utr3	rna-XM_027470203.1
RNFT2	RNFT2	NC_040061.1	9352957	9353018	peak_13488	62	+	NP_exon	rna-XR_003500796.1	RNFT2	NC_040061.1	9318743	9318834	peak_14120	92	+	NP_exon	rna-XR_003500796.1
FBXW8	FBXW8	NC_040061.1	9366389	9366479	peak_13490	91	+	cds	rna-XM_027469921.1	FBXW8	NC_040061.1	9415137	9415594	peak_14122	458	+	PR_intron	rna-XM_027469921.1
NIPSNAP1	NIPSNAP1	NC_040061.1	9626297	9626358	peak_13492	62	+	utr3	rna-XM_027469801.1	NIPSNAP1	NC_040061.1	9626237	9626358	peak_14123	122	+	utr3	rna-XM_027469801.1
THOC5	THOC5	NC_040061.1	9626418	9626598	peak_13493	181	+	utr5	rna-XM_027469796.1	THOC5	NC_040061.1	9626418	9626568	peak_14124	151	+	utr5	rna-XM_027469796.1
NF2	NF2	NC_040061.1	9660138	9661498	peak_13495	1361	+	PR_intron	rna-XM_013104243.3	NF2	NC_040061.1	9660108	9661498	peak_14126	1391	+	PR_intron	rna-XM_013104243.3
MTMR3	MTMR3	NC_040061.1	9800184	9801053	peak_13498	870	+	cds	rna-XM_027470109.1	MTMR3	NC_040061.1	9800154	9801083	peak_14129	930	+	cds	rna-XM_027470109.1
HORMAD2	HORMAD2	NC_040061.1	9857481	9857572	peak_13501	92	+	utr3	rna-XM_013104249.3	HORMAD2	NC_040061.1	9848959	9849049	peak_14133	91	+	PR_intron	rna-XM_013104249.3
TCN2	TCN2	NC_040061.1	9959183	9959364	peak_13502	182	+	utr5	rna-XM_027470259.1	TCN2	NC_040061.1	9959094	9959394	peak_14136	301	+	utr5	rna-XM_027470259.1
OSBP2	OSBP2	NC_040061.1	10051503	10051684	peak_13503	182	+	cds	rna-XM_027470265.1	OSBP2	NC_040061.1	10042381	10043556	peak_14137	1176	+	PR_intron	rna-XM_027470265.1
SCARF2	SCARF2	NC_040061.1	10741721	10742886	peak_13507	1166	+	cds	rna-XM_027469971.1	SCARF2	NC_040061.1	10741781	10742826	peak_14142	1046	+	cds	rna-XM_027469971.1
LOC101790280	LOC101790280	NC_040061.1	10842325	10842953	peak_13509	629	+	PR_intron	rna-XM_027470062.1	LOC101790280	NC_040061.1	10847806	10847956	peak_14144	151	+	PR_intron	rna-XM_027470062.1
EXPH5	EXPH5	NC_040046.1	16363885	16364006	peak_1351	122	-	cds	rna-XM_027468525.1	EXPH5	NC_040046.1	16366936	16367087	peak_1431	152	-	cds	rna-XM_027468525.1
LOC113845360	LOC113845360	NC_040061.1	10932791	10933061	peak_13512	271	+	utr5	rna-XM_027470225.1	LOC113845360	NC_040061.1	10932791	10933061	peak_14147	271	+	utr5	rna-XM_027470225.1
NCOR2	NCOR2	NC_040061.1	11180218	11190959	peak_13514	10742	+	PR_intron	rna-XM_027469767.1	NCOR2	NC_040061.1	11174863	11190989	peak_14149	16127	+	PR_intron	rna-XM_027469767.1
RDX	RDX	NC_040046.1	17028055	17035588	peak_1352	7534	-	PR_intron	rna-XM_027465129.1	RDX	NC_040046.1	17028055	17035588	peak_1433	7534	-	PR_intron	rna-XM_027465129.1
CCDC92	CCDC92	NC_040061.1	11441056	11441475	peak_13521	420	+	cds	rna-XM_013096463.3	CCDC92	NC_040061.1	11439285	11441445	peak_14159	2161	+	PR_intron	rna-XM_013096463.3
EIF2B1	EIF2B1	NC_040061.1	11537710	11537919	peak_13523	210	+	cds	rna-XM_027469773.1	EIF2B1	NC_040061.1	11537739	11537919	peak_14161	181	+	utr3	rna-XM_027469773.1
RILPL1	RILPL1	NC_040061.1	11554215	11567207	peak_13524	12993	+	PR_intron	rna-XM_027470229.1	RILPL1	NC_040061.1	11554245	11567207	peak_14162	12963	+	PR_intron	rna-XM_027470229.1
SNRNP35	SNRNP35	NC_040061.1	11580188	11580395	peak_13526	208	+	PR_intron	rna-XM_021270069.2	SNRNP35	NC_040061.1	11580188	11580395	peak_14164	208	+	PR_intron	rna-XM_021270069.2
SBNO1	SBNO1	NC_040061.1	11599635	11600552	peak_13528	918	+	PR_intron	rna-XM_027469725.1	SBNO1	NC_040061.1	11599635	11600552	peak_14165	918	+	PR_intron	rna-XM_027469725.1
MPHOSPH9	MPHOSPH9	NC_040061.1	11672477	11673612	peak_13531	1136	+	PR_intron	rna-XM_013096482.3	MPHOSPH9	NC_040061.1	11672387	11672598	peak_14168	212	+	cds	rna-XM_013096482.3
PITPNM2	PITPNM2	NC_040061.1	11760252	11775475	peak_13532	15224	+	PR_intron	rna-XM_027469735.1	PITPNM2	NC_040061.1	11824085	11824954	peak_14169	870	+	utr3	rna-XM_027469735.1
ABCB9	ABCB9	NC_040061.1	11855513	11855723	peak_13535	211	+	cds	rna-XM_021270077.2	ABCB9	NC_040061.1	11855602	11855842	peak_14170	241	+	cds	rna-XM_021270077.2
VPS37B	VPS37B	NC_040061.1	11863425	11872141	peak_13536	8717	+	PR_intron	rna-XM_027469816.1	VPS37B	NC_040061.1	11863425	11872111	peak_14171	8687	+	PR_intron	rna-XM_027469816.1
ANAPC7	ANAPC7	NC_040061.1	11939299	11940626	peak_13538	1328	+	PR_intron	rna-XM_027469814.1	ANAPC7	NC_040061.1	11939299	11940626	peak_14173	1328	+	PR_intron	rna-XM_027469814.1
RNF34	RNF34	NC_040061.1	12143415	12143625	peak_13539	211	+	cds	rna-XM_027469663.1	RNF34	NC_040061.1	12141001	12141181	peak_14175	181	+	cds	rna-XM_027469663.1
MORN3	MORN3	NC_040061.1	12263530	12263889	peak_13540	360	+	PR_intron	rna-XM_027469665.1	MORN3	NC_040061.1	12263530	12263919	peak_14178	390	+	PR_intron	rna-XM_027469665.1
SETD1B	SETD1B	NC_040061.1	12322928	12323079	peak_13542	152	+	utr5	rna-XM_027469684.1	SETD1B	NC_040061.1	12322898	12323109	peak_14179	212	+	utr5	rna-XM_027469684.1
ARHGAP20	ARHGAP20	NC_040046.1	17124559	17124650	peak_1355	92	-	cds	rna-XM_027468631.1	ARHGAP20	NC_040046.1	17124380	17125098	peak_1436	719	-	cds	rna-XM_027468631.1
feadf5ad-a8ac-40ed-876a-8181bc877b90	feadf5ad-a8ac-40ed-876a-8181bc877b90	NC_040061.1	12366605	12366936	peak_13550	332	+	NP_exon	feadf5ad-a8ac-40ed-876a-8181bc877b90.trans	feadf5ad-a8ac-40ed-876a-8181bc877b90	NC_040061.1	12366605	12366966	peak_14189	362	+	NP_exon	feadf5ad-a8ac-40ed-876a-8181bc877b90.trans
BCL7A	BCL7A	NC_040061.1	12400855	12412055	peak_13552	11201	+	PR_intron	rna-XM_027469823.1	BCL7A	NC_040061.1	12400915	12405331	peak_14191	4417	+	PR_intron	rna-XM_027469823.1
MLXIP	MLXIP	NC_040061.1	12424363	12424514	peak_13554	152	+	NP_exon	rna-XR_001194752.3	MLXIP	NC_040061.1	12452811	12452932	peak_14194	122	+	cds	rna-XM_013107462.3
B3GNT4	B3GNT4	NC_040061.1	12488925	12489195	peak_13559	271	+	cds	rna-XM_027470171.1	B3GNT4	NC_040061.1	12489014	12489105	peak_14197	92	+	cds	rna-XM_027470171.1
DHX37	DHX37	NC_040061.1	23367	23926	peak_13561	560	-	PR_intron	rna-XM_027469894.1	DHX37	NC_040061.1	23427	23926	peak_14199	500	-	PR_intron	rna-XM_027469894.1
BRI3BP	BRI3BP	NC_040061.1	38012	38343	peak_13564	332	-	utr3	rna-XM_027469895.1	BRI3BP	NC_040061.1	38042	38313	peak_14202	272	-	utr3	rna-XM_027469895.1
SLC15A4	SLC15A4	NC_040061.1	1026845	1026906	peak_13566	62	-	cds	rna-XM_005018137.3	SLC15A4	NC_040061.1	1052895	1053045	peak_14204	151	-	NP_exon	rna-XR_003500834.1
TMEM132D	TMEM132D	NC_040061.1	1145771	1145952	peak_13567	182	-	cds	rna-XM_013098101.3	TMEM132D	NC_040061.1	1144332	1144483	peak_14205	152	-	utr3	rna-XM_013098101.3
STX2	STX2	NC_040061.1	1773303	1775020	peak_13568	1718	-	PR_intron	rna-XM_027470138.1	STX2	NC_040061.1	1773303	1773526	peak_14215	224	-	PR_intron	rna-XM_027470139.1
CENPJ	CENPJ	NC_040046.1	17385636	17385697	peak_1357	62	-	cds	rna-XM_005014588.4	CENPJ	NC_040046.1	17381857	17381978	peak_1437	122	-	cds	rna-XM_005014588.4
LOC101801322	LOC101801322	NC_040061.1	3935599	3935810	peak_13570	212	-	utr3	rna-XM_027469873.1	LOC101801322	NC_040061.1	3950713	3950803	peak_14219	91	-	cds	rna-XM_027469873.1
PGAM5	PGAM5	NC_040061.1	4030289	4030468	peak_13573	180	-	utr3	rna-XM_027470181.1	PGAM5	NC_040061.1	4030259	4030528	peak_14221	270	-	utr3	rna-XM_027470181.1
ZDHHC8	ZDHHC8	NC_040061.1	4056827	4057007	peak_13574	181	-	utr3	rna-XM_027469644.1	ZDHHC8	NC_040061.1	4056917	4057097	peak_14222	181	-	utr3	rna-XM_027469644.1
PSPC1	PSPC1	NC_040046.1	17473594	17473655	peak_1358	62	-	NP_exon	rna-XR_003500603.1	PSPC1	NC_040046.1	17473564	17473744	peak_1440	181	-	NP_exon	rna-XR_003500603.1
RANBP1	RANBP1	NC_040061.1	4176922	4179912	peak_13580	2991	-	PR_intron	rna-XM_027470249.1	RANBP1	NC_040061.1	4176922	4179912	peak_14225	2991	-	PR_intron	rna-XM_027470249.1
DGCR8	DGCR8	NC_040061.1	4197454	4198078	peak_13583	625	-	PR_intron	rna-XM_027470246.1	DGCR8	NC_040061.1	4197454	4198621	peak_14228	1168	-	PR_intron	rna-XM_027470246.1
TANGO2	TANGO2	NC_040061.1	4246648	4248672	peak_13586	2025	-	PR_intron	rna-XM_027469964.1	TANGO2	NC_040061.1	4246618	4252444	peak_14230	5827	-	PR_intron	rna-XM_027469964.1
COMT	COMT	NC_040061.1	4536489	4536669	peak_13587	181	-	utr3	rna-XM_005024381.4	COMT	NC_040061.1	4536519	4536699	peak_14231	181	-	utr3	rna-XM_005024381.4
SEPT5	SEPT5	NC_040061.1	4849688	4850439	peak_13591	752	-	PR_intron	rna-XM_013104048.3	SEPT5	NC_040061.1	4849688	4850439	peak_14234	752	-	PR_intron	rna-XM_013104048.3
CDC45	CDC45	NC_040061.1	4971691	4974213	peak_13593	2523	-	PR_intron	rna-XM_027469626.1	CDC45	NC_040061.1	4972348	4973516	peak_14236	1169	-	PR_intron	rna-XM_027469626.1
MRPL40	MRPL40	NC_040061.1	4985736	4985974	peak_13594	239	-	cds	rna-XM_027469633.1	MRPL40	NC_040061.1	4985707	4986004	peak_14237	298	-	cds	rna-XM_027469633.1
YPEL1	YPEL1	NC_040061.1	5118002	5119402	peak_13596	1401	-	PR_intron	rna-XM_027469634.1	YPEL1	NC_040061.1	5118062	5119373	peak_14239	1312	-	PR_intron	rna-XM_027469634.1
PPM1F	PPM1F	NC_040061.1	5222107	5222348	peak_13599	242	-	utr3	rna-XM_027470191.1	PPM1F	NC_040061.1	5222077	5222318	peak_14240	242	-	utr3	rna-XM_027470191.1
TOP3B	TOP3B	NC_040061.1	5248867	5249136	peak_13602	270	-	cds	rna-XM_027470193.1	TOP3B	NC_040061.1	5248867	5249136	peak_14242	270	-	cds	rna-XM_027470193.1
SDF2L1	SDF2L1	NC_040061.1	5334784	5336547	peak_13603	1764	-	PR_intron	rna-XM_027470196.1	SDF2L1	NC_040061.1	5334724	5336547	peak_14243	1824	-	PR_intron	rna-XM_027470196.1
UBE2L3	UBE2L3	NC_040061.1	5363147	5366853	peak_13604	3707	-	PR_intron	rna-XM_027469859.1	UBE2L3	NC_040061.1	5363147	5366853	peak_14244	3707	-	PR_intron	rna-XM_027469859.1
DGCR2	DGCR2	NC_040061.1	5785312	5785732	peak_13605	421	-	utr3	rna-XM_027470251.1	DGCR2	NC_040061.1	5785312	5786211	peak_14245	900	-	utr3	rna-XM_027470251.1
ESS2	ESS2	NC_040061.1	5835211	5835420	peak_13607	210	-	utr3	rna-XM_021273490.2	ESS2	NC_040061.1	5835330	5835390	peak_14246	61	-	utr3	rna-XM_021273490.2
CRKL	CRKL	NC_040061.1	6205666	6214962	peak_13610	9297	-	PR_intron	rna-XM_013103430.3	CRKL	NC_040061.1	6205636	6206086	peak_14251	451	-	utr3	rna-XM_013103430.3
KLHL22	KLHL22	NC_040061.1	6225217	6225576	peak_13612	360	-	utr3	rna-XM_021275132.2	KLHL22	NC_040061.1	6225246	6225635	peak_14253	390	-	utr3	rna-XM_021275132.2
SNRPD3	SNRPD3	NC_040061.1	6413242	6413303	peak_13616	62	-	cds	rna-XM_027470096.1	SNRPD3	NC_040061.1	6413183	6414442	peak_14257	1260	-	PR_intron	rna-XM_027470096.1
ADORA2A	ADORA2A	NC_040061.1	6452603	6452724	peak_13618	122	-	NP_exon	rna-XR_003500886.1	ADORA2A	NC_040061.1	6456593	6456804	peak_14258	212	-	NP_exon	rna-XR_003500886.1
LATS2	LATS2	NC_040046.1	18055995	18056086	peak_1362	92	-	cds	rna-XM_027469020.1	LATS2	NC_040046.1	18055905	18056026	peak_1448	122	-	cds	rna-XM_027469020.1
SPECC1L	SPECC1L	NC_040061.1	6507431	6507762	peak_13631	332	-	utr3	rna-XM_013103420.3	SPECC1L	NC_040061.1	6507431	6507821	peak_14265	391	-	utr3	rna-XM_013103420.3
BCR	BCR	NC_040061.1	6586326	6595757	peak_13637	9432	-	PR_intron	rna-XM_027469696.1	BCR	NC_040061.1	6586355	6587508	peak_14272	1154	-	PR_intron	rna-XM_027469696.1
RSPH14	RSPH14	NC_040061.1	6750211	6763335	peak_13639	13125	-	PR_intron	rna-XM_005026721.4	RSPH14	NC_040061.1	6709218	6709309	peak_14276	92	-	PR_intron	rna-XM_005026721.4
YWHAH	YWHAH	NC_040061.1	6858124	6866914	peak_13640	8791	-	PR_intron	rna-XM_027469718.1	YWHAH	NC_040061.1	6858094	6858720	peak_14279	627	-	cds	rna-XM_027469718.1
DEPDC5	DEPDC5	NC_040061.1	6888221	6888611	peak_13641	391	-	cds	rna-XM_027469691.1	DEPDC5	NC_040061.1	6888221	6888611	peak_14280	391	-	cds	rna-XM_027469691.1
SFI1	SFI1	NC_040061.1	6999289	7000085	peak_13645	797	-	PR_intron	rna-XM_027469701.1	SFI1	NC_040061.1	6998706	7000917	peak_14285	2212	-	PR_intron	rna-XM_027469701.1
LIMK2	LIMK2	NC_040061.1	7099845	7100296	peak_13646	452	-	utr3	rna-XM_027470049.1	LIMK2	NC_040061.1	7099845	7100925	peak_14286	1081	-	utr3	rna-XM_027470049.1
RNF185	RNF185	NC_040061.1	7130525	7130736	peak_13649	212	-	utr3	rna-XM_027470056.1	RNF185	NC_040061.1	7130525	7130706	peak_14288	182	-	utr3	rna-XM_027470056.1
ACADS	ACADS	NC_040061.1	7239998	7240237	peak_13651	240	-	utr3	rna-XM_027470104.1	ACADS	NC_040061.1	7239998	7240267	peak_14291	270	-	utr3	rna-XM_027470104.1
UNC119B	UNC119B	NC_040061.1	7245826	7245886	peak_13652	61	-	utr3	rna-XM_027470108.1	UNC119B	NC_040061.1	7248957	7249107	peak_14292	151	-	utr3	rna-XM_027470108.1
MLEC	MLEC	NC_040061.1	7258068	7258458	peak_13654	391	-	utr3	rna-XM_027470107.1	MLEC	NC_040061.1	7258068	7258877	peak_14293	810	-	utr3	rna-XM_027470107.1
RNF10	RNF10	NC_040061.1	7331734	7333390	peak_13656	1657	-	PR_intron	rna-XM_027469988.1	RNF10	NC_040061.1	7331734	7333390	peak_14294	1657	-	PR_intron	rna-XM_027469988.1
LOC113839606	LOC113839606	NC_040061.1	7345332	7345511	peak_13657	180	-	utr5	rna-XM_027470000.1	LOC113839606	NC_040061.1	7345391	7345511	peak_14296	121	-	utr5	rna-XM_027470000.1
LOC101791011	LOC101791011	NC_040061.1	7349212	7349422	peak_13658	211	-	utr3	rna-XM_027469999.1	LOC101791011	NC_040061.1	7349242	7349422	peak_14297	181	-	utr3	rna-XM_027469999.1
LOC101790824	LOC101790824	NC_040061.1	7362897	7363016	peak_13659	120	-	utr5	rna-XM_005026649.4	LOC101790824	NC_040061.1	7361700	7361790	peak_14298	91	-	utr3	rna-XM_005026649.4
MICU2	MICU2	NC_040046.1	18202582	18202792	peak_1366	211	-	utr3	rna-XM_027469067.1	MICU2	NC_040046.1	18202612	18202821	peak_1451	210	-	utr3	rna-XM_027469067.1
LOC101790617	LOC101790617	NC_040061.1	7374687	7374805	peak_13660	119	-	cds	rna-XM_027469997.1	LOC101790617	NC_040061.1	7374716	7374805	peak_14300	90	-	utr5	rna-XM_027469997.1
BICDL1	BICDL1	NC_040061.1	7627213	7631829	peak_13661	4617	-	NP_intron	rna-XR_003500835.1	BICDL1	NC_040061.1	7580967	7581058	peak_14302	92	-	NP_exon	rna-XR_003500835.1
PRKAB1	PRKAB1	NC_040061.1	7737722	7738864	peak_13662	1143	-	PR_intron	rna-XM_027469918.1	PRKAB1	NC_040061.1	7737722	7738864	peak_14304	1143	-	PR_intron	rna-XM_027469918.1
HSPB8	HSPB8	NC_040061.1	7840763	7841001	peak_13663	239	-	utr5	rna-XM_027469892.1	HSPB8	NC_040061.1	7840792	7841001	peak_14305	210	-	utr5	rna-XM_027469892.1
SUDS3	SUDS3	NC_040061.1	7925592	7925712	peak_13664	121	-	utr3	rna-XM_027469961.1	SUDS3	NC_040061.1	7927470	7927948	peak_14307	479	-	utr3	rna-XM_027469961.1
PEBP1	PEBP1	NC_040061.1	8037370	8037490	peak_13667	121	-	utr5	rna-XM_027470279.1	PEBP1	NC_040061.1	8037400	8037490	peak_14309	91	-	utr5	rna-XM_027470279.1
DDX54	DDX54	NC_040061.1	8053173	8054723	peak_13668	1551	-	cds	rna-XM_027470314.1	DDX54	NC_040061.1	8053173	8054753	peak_14310	1581	-	cds	rna-XM_027470314.1
SLC8B1	SLC8B1	NC_040061.1	8103413	8103713	peak_13669	301	-	utr3	rna-XM_027470319.1	SLC8B1	NC_040061.1	8103413	8103683	peak_14311	271	-	utr3	rna-XM_027470319.1
SACS	SACS	NC_040046.1	19092014	19092225	peak_1367	212	-	cds	rna-XM_027469215.1	SACS	NC_040046.1	19092074	19092225	peak_1452	152	-	cds	rna-XM_027469215.1
RBM19	RBM19	NC_040061.1	8200565	8200685	peak_13671	121	-	utr3	rna-XM_027469898.1	RBM19	NC_040061.1	8200446	8200715	peak_14313	270	-	utr3	rna-XM_027469898.1
TBX5	TBX5	NC_040061.1	8352512	8352870	peak_13676	359	-	utr3	rna-XM_027470060.1	TBX5	NC_040061.1	8352274	8352900	peak_14318	627	-	utr3	rna-XM_027470060.1
TBX3	TBX3	NC_040061.1	8488818	8489028	peak_13677	211	-	utr3	rna-XM_027469958.1	TBX3	NC_040061.1	8488818	8489028	peak_14321	211	-	utr3	rna-XM_027469958.1
MED13L	MED13L	NC_040061.1	8997051	8997112	peak_13684	62	-	cds	rna-XM_027470034.1	MED13L	NC_040061.1	8994652	8994803	peak_14326	152	-	utr3	rna-XM_027470034.1
FBXO21	FBXO21	NC_040061.1	9425535	9425775	peak_13688	241	-	utr3	rna-XM_027469797.1	FBXO21	NC_040061.1	9425475	9425835	peak_14330	361	-	utr3	rna-XM_027469797.1
GAS2L1	GAS2L1	NC_040061.1	9598216	9598336	peak_13692	121	-	cds	rna-XM_027469795.1	GAS2L1	NC_040061.1	9597978	9598128	peak_14336	151	-	utr3	rna-XM_027469795.1
EWSR1	EWSR1	NC_040061.1	9606145	9607739	peak_13696	1595	-	PR_intron	rna-XM_027470205.1	EWSR1	NC_040061.1	9606145	9607739	peak_14340	1595	-	PR_intron	rna-XM_027470205.1
NEFH	NEFH	NC_040061.1	9636330	9636892	peak_13698	563	-	cds	rna-XM_027470206.1	NEFH	NC_040061.1	9636211	9636772	peak_14342	562	-	cds	rna-XM_027470206.1
CUL5	CUL5	NC_040046.1	16202936	16205099	peak_137	2164	+	PR_intron	rna-XM_027468475.1	CUL5	NC_040046.1	16189177	16189344	peak_139	168	+	PR_intron	rna-XM_027468475.1
TBC1D10A	TBC1D10A	NC_040061.1	9897200	9897440	peak_13701	241	-	utr3	rna-XM_027469975.1	TBC1D10A	NC_040061.1	9897230	9897529	peak_14347	300	-	utr3	rna-XM_027469975.1
SF3A1	SF3A1	NC_040061.1	9906656	9906897	peak_13703	242	-	utr3	rna-XM_027469880.1	SF3A1	NC_040061.1	9906656	9906897	peak_14348	242	-	utr3	rna-XM_027469880.1
GAL3ST1	GAL3ST1	NC_040061.1	9943943	9944151	peak_13707	209	-	cds	rna-XM_027470016.1	GAL3ST1	NC_040061.1	9943706	9944329	peak_14351	624	-	cds	rna-XM_027470016.1
PES1	PES1	NC_040061.1	9952986	9955023	peak_13708	2038	-	PR_intron	rna-XM_027470013.1	PES1	NC_040061.1	9952897	9955053	peak_14352	2157	-	PR_intron	rna-XM_027470013.1
SMTN	SMTN	NC_040061.1	10901503	10903242	peak_13712	1740	-	PR_intron	rna-XM_027470212.1	SMTN	NC_040061.1	10902403	10903212	peak_14358	810	-	PR_intron	rna-XM_027470212.1
5a0feb5c-7efd-4cae-8f48-8b95c4682aac	5a0feb5c-7efd-4cae-8f48-8b95c4682aac	NC_040061.1	10960793	10961271	peak_13715	479	-	NP_exon	5a0feb5c-7efd-4cae-8f48-8b95c4682aac.trans	5a0feb5c-7efd-4cae-8f48-8b95c4682aac	NC_040061.1	10961955	10962075	peak_14361	121	-	NP_exon	5a0feb5c-7efd-4cae-8f48-8b95c4682aac.trans
MORC2	MORC2	NC_040061.1	10962477	10963489	peak_13720	1013	-	PR_intron	rna-XM_027470213.1	MORC2	NC_040061.1	10962477	10963459	peak_14364	983	-	PR_intron	rna-XM_027470213.1
LOC101798185	LOC101798185	NC_040061.1	11307283	11307613	peak_13724	331	-	utr3	rna-XM_027469782.1	LOC101798185	NC_040061.1	11302760	11302940	peak_14367	181	-	utr3	rna-XM_027469782.1
DDX55	DDX55	NC_040061.1	11538380	11539198	peak_13727	819	-	PR_intron	rna-XM_027469772.1	DDX55	NC_040061.1	11538291	11539198	peak_14370	908	-	PR_intron	rna-XM_027469772.1
TMED2	TMED2	NC_040061.1	11546644	11549893	peak_13728	3250	-	PR_intron	rna-XM_027469784.1	TMED2	NC_040061.1	11546644	11549893	peak_14371	3250	-	PR_intron	rna-XM_027469784.1
7cb0fdac-ae09-4179-97ff-96075380766e	7cb0fdac-ae09-4179-97ff-96075380766e	NC_040061.1	11588300	11588478	peak_13731	179	-	NP_exon	7cb0fdac-ae09-4179-97ff-96075380766e.trans	7cb0fdac-ae09-4179-97ff-96075380766e	NC_040061.1	11588211	11588478	peak_14375	268	-	NP_exon	7cb0fdac-ae09-4179-97ff-96075380766e.trans
KMT5A	KMT5A	NC_040061.1	11588300	11592174	peak_13732	3875	-	PR_intron	rna-XM_027470217.1	KMT5A	NC_040061.1	11588211	11589617	peak_14376	1407	-	PR_intron	rna-XM_027470217.1
C16H12orf65	C16H12orf65	NC_040061.1	11661198	11662545	peak_13733	1348	-	PR_intron	rna-XM_027469745.1	C16H12orf65	NC_040061.1	11661198	11662779	peak_14378	1582	-	PR_intron	rna-XM_027469745.1
ARL6IP4	ARL6IP4	NC_040061.1	11829302	11832984	peak_13735	3683	-	PR_intron	rna-XM_027469744.1	ARL6IP4	NC_040061.1	11829302	11832954	peak_14379	3653	-	PR_intron	rna-XM_027469744.1
HIP1R	HIP1R	NC_040061.1	11882267	11882537	peak_13737	271	-	utr3	rna-XM_027469804.1	HIP1R	NC_040061.1	11882267	11882537	peak_14380	271	-	utr3	rna-XM_027469804.1
MIPEP	MIPEP	NC_040046.1	19278657	19286523	peak_1374	7867	-	PR_intron	rna-XM_027469279.1	MIPEP	NC_040046.1	19278657	19278898	peak_1461	242	-	utr3	rna-XM_027469279.1
CCDC62	CCDC62	NC_040061.1	11909335	11909844	peak_13743	510	-	cds	rna-XM_027469809.1	CCDC62	NC_040061.1	11904379	11904530	peak_14384	152	-	PR_intron	rna-XM_027469809.1
DENR	DENR	NC_040061.1	11917976	11921734	peak_13745	3759	-	PR_intron	rna-XM_027469818.1	DENR	NC_040061.1	11917311	11921734	peak_14386	4424	-	PR_intron	rna-XM_027469818.1
ATP2A2	ATP2A2	NC_040061.1	11995596	11996016	peak_13747	421	-	NP_exon	rna-XR_002400541.2	ATP2A2	NC_040061.1	11995596	11995986	peak_14388	391	-	NP_exon	rna-XR_002400541.2
IFT81	IFT81	NC_040061.1	12030596	12036816	peak_13748	6221	-	PR_intron	rna-XM_005028184.4	IFT81	NC_040061.1	12030566	12036816	peak_14389	6251	-	PR_intron	rna-XM_005028184.4
SPATA13	SPATA13	NC_040046.1	19378537	19378808	peak_1375	272	-	utr3	rna-XM_021274482.2	SPATA13	NC_040046.1	19378297	19378868	peak_1462	572	-	utr3	rna-XM_021274482.2
CAMKK2	CAMKK2	NC_040061.1	12104780	12105020	peak_13750	241	-	utr3	rna-XM_027470148.1	CAMKK2	NC_040061.1	12104720	12105049	peak_14391	330	-	utr3	rna-XM_027470148.1
KDM2B	KDM2B	NC_040061.1	12146684	12146895	peak_13751	212	-	utr3	rna-XM_027469649.1	KDM2B	NC_040061.1	12146654	12146955	peak_14393	302	-	utr3	rna-XM_027469649.1
DIABLO	DIABLO	NC_040061.1	12493124	12493243	peak_13758	120	-	cds	rna-XM_027470174.1	DIABLO	NC_040061.1	12493066	12493243	peak_14399	178	-	cds	rna-XM_027470174.1
VPS33A	VPS33A	NC_040061.1	12509692	12509872	peak_13759	181	-	utr5	rna-XM_027470172.1	VPS33A	NC_040061.1	12509811	12509872	peak_14400	62	-	utr5	rna-XM_027470172.1
CLIP1	CLIP1	NC_040061.1	12510224	12510464	peak_13760	241	-	utr3	rna-XM_027470158.1	CLIP1	NC_040061.1	12510224	12510524	peak_14401	301	-	cds	rna-XM_027470158.1
ZCCHC8	ZCCHC8	NC_040061.1	12584477	12584598	peak_13769	122	-	utr3	rna-XM_027469641.1	ZCCHC8	NC_040061.1	12584864	12585685	peak_14410	822	-	cds	rna-XM_027469641.1
RSRC2	RSRC2	NC_040061.1	12597525	12599167	peak_13773	1643	-	PR_intron	rna-XM_021277947.2	RSRC2	NC_040061.1	12597525	12599167	peak_14413	1643	-	PR_intron	rna-XM_021277947.2
LOC101804334	LOC101804334	NC_040062.1	140153	140512	peak_13775	360	+	cds	rna-XM_027470454.1	LOC101804334	NC_040062.1	139945	140512	peak_14415	568	+	cds	rna-XM_027470454.1
TNXB	TNXB	NC_040062.1	493805	494198	peak_13779	394	+	PR_intron	rna-XM_027470381.1	TNXB	NC_040062.1	487088	487325	peak_14419	238	+	PR_intron	rna-XM_027470381.1
LOC101798404	LOC101798404	NC_040062.1	536686	536776	peak_13780	91	+	utr3	rna-XM_027470517.1	LOC101798404	NC_040062.1	536686	536865	peak_14422	180	+	utr3	rna-XM_027470517.1
LOC101799516	LOC101799516	NC_040062.1	580095	580334	peak_13781	240	+	cds	rna-XM_005028672.4	LOC101799516	NC_040062.1	580124	580304	peak_14425	181	+	cds	rna-XM_005028672.4
04fa9dce-dc3a-4b00-90c6-89990774e24d	04fa9dce-dc3a-4b00-90c6-89990774e24d	NC_040062.1	955319	955735	peak_13792	417	+	NP_exon	04fa9dce-dc3a-4b00-90c6-89990774e24d.trans	04fa9dce-dc3a-4b00-90c6-89990774e24d	NC_040062.1	955200	955735	peak_14431	536	+	NP_exon	04fa9dce-dc3a-4b00-90c6-89990774e24d.trans
LOC113845399	LOC113845399	NC_040062.1	967429	967713	peak_13795	285	+	cds	rna-XM_027470525.1	LOC113845399	NC_040062.1	967563	967713	peak_14433	151	+	cds	rna-XM_027470525.1
150835b5-bb53-452d-acc6-5e9b49f5445c	150835b5-bb53-452d-acc6-5e9b49f5445c	NC_040062.1	970213	970422	peak_13797	210	+	NP_exon	150835b5-bb53-452d-acc6-5e9b49f5445c.trans	150835b5-bb53-452d-acc6-5e9b49f5445c	NC_040062.1	970213	970393	peak_14435	181	+	NP_exon	150835b5-bb53-452d-acc6-5e9b49f5445c.trans
MTMR6	MTMR6	NC_040046.1	19657003	19662059	peak_1380	5057	-	PR_intron	rna-XM_027469402.1	MTMR6	NC_040046.1	19640234	19640474	peak_1467	241	-	cds	rna-XM_027469402.1
LOC101799628	LOC101799628	NC_040062.1	542393	542664	peak_13804	272	-	utr3	rna-XM_027470545.1	LOC101799628	NC_040062.1	542393	542664	peak_14439	272	-	utr3	rna-XM_027470545.1
LOC101800843	LOC101800843	NC_040062.1	609814	609935	peak_13809	122	-	cds	rna-XM_027470430.1	LOC101800843	NC_040062.1	609874	609965	peak_14444	92	-	cds	rna-XM_027470430.1
RNF6	RNF6	NC_040046.1	20054889	20055338	peak_1381	450	-	cds	rna-XM_005022568.4	RNF6	NC_040046.1	20055009	20055666	peak_1469	658	-	cds	rna-XM_005022568.4
LOC113845394	LOC113845394	NC_040062.1	812447	812776	peak_13810	330	-	cds	rna-XM_027470492.1	LOC113845394	NC_040062.1	812387	812806	peak_14446	420	-	cds	rna-XM_027470492.1
LOC101791922	LOC101791922	NC_040062.1	829650	830423	peak_13815	774	-	PR_intron	rna-XM_021271516.2	LOC101791922	NC_040062.1	841671	844608	peak_14449	2938	-	PR_intron	rna-XM_021271516.2
LOC101792635	LOC101792635	NC_040062.1	856954	857373	peak_13818	420	-	cds	rna-XM_027470376.1	LOC101792635	NC_040062.1	855971	856062	peak_14450	92	-	utr3	rna-XM_027470376.1
LOC101790522	LOC101790522	NC_040062.1	956074	956730	peak_13821	657	-	utr3	rna-XM_027470425.1	LOC101790522	NC_040062.1	956074	956671	peak_14456	598	-	utr3	rna-XM_027470425.1
LOC101792248	LOC101792248	NC_040062.1	972513	972869	peak_13822	357	-	cds	rna-XM_027470546.1	LOC101792248	NC_040062.1	972424	972869	peak_14457	446	-	cds	rna-XM_027470546.1
DPP7	DPP7	NC_040063.1	127361	127721	peak_13825	361	+	utr3	rna-XM_027470661.1	DPP7	NC_040063.1	125182	125682	peak_14461	501	+	PR_intron	rna-XM_027470661.1
SAPCD2	SAPCD2	NC_040063.1	194925	203429	peak_13826	8505	+	PR_intron	rna-XM_027470852.1	SAPCD2	NC_040063.1	194865	203429	peak_14463	8565	+	PR_intron	rna-XM_027470852.1
ENTPD2	ENTPD2	NC_040063.1	234292	234412	peak_13828	121	+	utr5	rna-XM_027470769.1	ENTPD2	NC_040063.1	234262	234442	peak_14464	181	+	utr5	rna-XM_027470769.1
PAXX	PAXX	NC_040063.1	260274	260393	peak_13831	120	+	utr3	rna-XM_027470878.1	PAXX	NC_040063.1	260215	260364	peak_14467	150	+	utr3	rna-XM_027470878.1
FBXW5	FBXW5	NC_040063.1	407125	407335	peak_13833	211	+	cds	rna-XM_027471045.1	FBXW5	NC_040063.1	407095	407394	peak_14468	300	+	cds	rna-XM_027471045.1
EDF1	EDF1	NC_040063.1	441783	444723	peak_13835	2941	+	PR_intron	rna-XM_027470843.1	EDF1	NC_040063.1	441783	444723	peak_14470	2941	+	PR_intron	rna-XM_027470843.1
POLE3	POLE3	NC_040063.1	1509848	1509998	peak_13838	151	+	utr5	rna-XM_027470864.1	POLE3	NC_040063.1	1509848	1509998	peak_14474	151	+	utr5	rna-XM_027470864.1
CDC26	CDC26	NC_040063.1	1554499	1554872	peak_13840	374	+	cds	rna-XM_027470635.1	CDC26	NC_040063.1	1554499	1554872	peak_14477	374	+	cds	rna-XM_027470635.1
FKBP15	FKBP15	NC_040063.1	1596195	1597798	peak_13841	1604	+	PR_intron	rna-XM_027470570.1	FKBP15	NC_040063.1	1596195	1597061	peak_14478	867	+	PR_intron	rna-XM_027470570.1
ZMYND19	ZMYND19	NC_040063.1	1657681	1658922	peak_13845	1242	+	PR_intron	rna-XM_027471106.1	ZMYND19	NC_040063.1	1657651	1658922	peak_14482	1272	+	PR_intron	rna-XM_027471106.1
DPH7	DPH7	NC_040063.1	1669990	1670229	peak_13847	240	+	cds	rna-XM_027471105.1	DPH7	NC_040063.1	1669990	1670408	peak_14484	419	+	cds	rna-XM_027471105.1
NSMF	NSMF	NC_040063.1	1838612	1838763	peak_13848	152	+	cds	rna-XM_027470940.1	NSMF	NC_040063.1	1838582	1838763	peak_14485	182	+	cds	rna-XM_027470940.1
LNX2	LNX2	NC_040046.1	20535658	20535809	peak_1385	152	-	utr3	rna-XM_027469623.1	LNX2	NC_040046.1	20535718	20535899	peak_1475	182	-	utr3	rna-XM_027469623.1
TPRN	TPRN	NC_040063.1	1875158	1875338	peak_13850	181	+	cds	rna-XM_027470954.1	TPRN	NC_040063.1	1875759	1890228	peak_14488	14470	+	PR_intron	rna-XM_027470954.1
ANAPC2	ANAPC2	NC_040063.1	1896601	1897504	peak_13852	904	+	PR_intron	rna-XM_027470949.1	ANAPC2	NC_040063.1	1896511	1897504	peak_14491	994	+	PR_intron	rna-XM_027470949.1
TOR4A	TOR4A	NC_040063.1	1911655	1913039	peak_13855	1385	+	PR_intron	rna-XM_005027519.4	TOR4A	NC_040063.1	1915549	1915609	peak_14494	61	+	PR_intron	rna-XM_005027519.4
LOC101791127	LOC101791127	NC_040063.1	1990335	1991083	peak_13861	749	+	utr3	rna-XM_027471212.1	LOC101791127	NC_040063.1	1990365	1991083	peak_14499	719	+	utr3	rna-XM_027471212.1
ARRDC1	ARRDC1	NC_040063.1	2119598	2119778	peak_13864	181	+	cds	rna-XM_027470771.1	ARRDC1	NC_040063.1	2119628	2119778	peak_14501	151	+	cds	rna-XM_027470771.1
EHMT1	EHMT1	NC_040063.1	2125835	2143702	peak_13865	17868	+	PR_intron	rna-XM_027471165.1	EHMT1	NC_040063.1	2125805	2143702	peak_14502	17898	+	PR_intron	rna-XM_027471165.1
LOC101796328	LOC101796328	NC_040063.1	2595240	2597133	peak_13872	1894	+	PR_intron	rna-XM_027471111.1	LOC101796328	NC_040063.1	2592701	2597133	peak_14510	4433	+	PR_intron	rna-XM_027471111.1
ATP6V1G1	ATP6V1G1	NC_040063.1	2690968	2693874	peak_13875	2907	+	PR_intron	rna-XM_027470866.1	ATP6V1G1	NC_040063.1	2690968	2693874	peak_14514	2907	+	PR_intron	rna-XM_027470866.1
PAPPA	PAPPA	NC_040063.1	3249036	3249097	peak_13876	62	+	utr5	rna-XM_027470994.1	PAPPA	NC_040063.1	3298599	3298840	peak_14516	242	+	PR_intron	rna-XM_027470994.1
FLT1	FLT1	NC_040046.1	20859247	20862298	peak_1388	3052	-	PR_intron	rna-XM_027469712.1	FLT1	NC_040046.1	20885849	20886030	peak_1478	182	-	cds	rna-XM_027469712.1
ASTN2	ASTN2	NC_040063.1	3598111	3598381	peak_13881	271	+	PR_intron	rna-XM_027470996.1	ASTN2	NC_040063.1	3597933	3598351	peak_14523	419	+	PR_intron	rna-XM_027470996.1
TLR4	TLR4	NC_040063.1	3910012	3910161	peak_13888	150	+	utr3	rna-NM_001310413.1	TLR4	NC_040063.1	3909833	3909894	peak_14528	62	+	utr3	rna-NM_001310413.1
COL27A1	COL27A1	NC_040063.1	5102082	5102353	peak_13889	272	+	cds	rna-XM_027470677.1	COL27A1	NC_040063.1	5102052	5102293	peak_14529	242	+	cds	rna-XM_027470677.1
SLC25A25	SLC25A25	NC_040063.1	5319895	5320256	peak_13895	362	+	utr3	rna-XM_027471062.1	SLC25A25	NC_040063.1	5318248	5318458	peak_14533	211	+	cds	rna-XM_027471070.1
SH2D3C	SH2D3C	NC_040063.1	5342389	5342473	peak_13896	85	+	PR_intron	rna-XM_027471140.1	SH2D3C	NC_040063.1	5360822	5361213	peak_14535	392	+	cds	rna-XM_027471136.1
TOR2A	TOR2A	NC_040063.1	5367498	5367766	peak_13898	269	+	utr3	rna-XM_027471150.1	TOR2A	NC_040063.1	5367646	5367766	peak_14536	121	+	utr3	rna-XM_027471150.1
TRUB2	TRUB2	NC_040063.1	5435113	5435500	peak_13899	388	+	cds	rna-XM_027470626.1	TRUB2	NC_040063.1	5435202	5435500	peak_14538	299	+	cds	rna-XM_027470626.1
ACAT1	ACAT1	NC_040046.1	16224048	16224139	peak_139	92	+	cds	rna-XM_027468508.1	ACAT1	NC_040046.1	16224048	16224139	peak_141	92	+	cds	rna-XM_027468508.1
RXRA	RXRA	NC_040063.1	5969715	5969776	peak_13901	62	+	PR_intron	rna-XM_027471073.1	RXRA	NC_040063.1	5975888	5976098	peak_14542	211	+	PR_intron	rna-XM_027471073.1
BRD3	BRD3	NC_040063.1	6084964	6085897	peak_13905	934	+	PR_intron	rna-XM_027470580.1	BRD3	NC_040063.1	6084994	6085867	peak_14543	874	+	PR_intron	rna-XM_027470580.1
VAV2	VAV2	NC_040063.1	6133948	6134249	peak_13910	302	+	utr5	rna-XM_027471056.1	VAV2	NC_040063.1	6133948	6134309	peak_14548	362	+	utr5	rna-XM_027471056.1
MYMK	MYMK	NC_040063.1	6364069	6364309	peak_13914	241	+	utr3	rna-XM_027471022.1	MYMK	NC_040063.1	6364039	6364339	peak_14553	301	+	utr3	rna-XM_027471022.1
REXO4	REXO4	NC_040063.1	6426135	6426967	peak_13916	833	+	cds	rna-XM_027470730.1	REXO4	NC_040063.1	6425957	6426996	peak_14554	1040	+	cds	rna-XM_027470730.1
SURF4	SURF4	NC_040063.1	6453925	6454106	peak_13918	182	+	utr3	rna-XM_027470723.1	SURF4	NC_040063.1	6453895	6454166	peak_14556	272	+	utr3	rna-XM_027470723.1
LOC101800421	LOC101800421	NC_040063.1	6460360	6461175	peak_13919	816	+	PR_intron	rna-XM_027470722.1	LOC101800421	NC_040063.1	6460360	6461175	peak_14557	816	+	PR_intron	rna-XM_027470722.1
5609ace2-98ab-49e6-90ed-7917d446d0d5	5609ace2-98ab-49e6-90ed-7917d446d0d5	NC_040046.1	21317428	21317639	peak_1392	212	-	NP_exon	5609ace2-98ab-49e6-90ed-7917d446d0d5.trans	5609ace2-98ab-49e6-90ed-7917d446d0d5	NC_040046.1	21317392	21317648	peak_1483	257	-	NP_exon	5609ace2-98ab-49e6-90ed-7917d446d0d5.trans
MED22	MED22	NC_040063.1	6475131	6476124	peak_13920	994	+	PR_intron	rna-XM_027470729.1	MED22	NC_040063.1	6476003	6476094	peak_14558	92	+	cds	rna-XM_027470728.1
SURF6	SURF6	NC_040063.1	6478105	6478254	peak_13921	150	+	cds	rna-XM_021267972.2	SURF6	NC_040063.1	6478910	6480331	peak_14559	1422	+	cds	rna-XM_021267972.2
GBGT1	GBGT1	NC_040063.1	6512513	6512723	peak_13923	211	+	cds	rna-XM_013093698.3	GBGT1	NC_040063.1	6512394	6512961	peak_14560	568	+	cds	rna-XM_013093698.3
RALGDS	RALGDS	NC_040063.1	6569356	6569956	peak_13925	601	+	utr3	rna-XM_027470587.1	RALGDS	NC_040063.1	6529909	6529970	peak_14562	62	+	PR_intron	rna-XM_027470591.1
TSC1	TSC1	NC_040063.1	6636223	6636344	peak_13926	122	+	cds	rna-XM_005013256.4	TSC1	NC_040063.1	6636044	6636344	peak_14564	301	+	cds	rna-XM_005013256.4
291c26de-4c22-4c69-9871-df999025fc37	291c26de-4c22-4c69-9871-df999025fc37	NC_040063.1	6641605	6643322	peak_13927	1718	+	NP_exon	291c26de-4c22-4c69-9871-df999025fc37.trans	291c26de-4c22-4c69-9871-df999025fc37	NC_040063.1	6642507	6643317	peak_14567	811	+	NP_exon	291c26de-4c22-4c69-9871-df999025fc37.trans
DDX31	DDX31	NC_040063.1	6741599	6741838	peak_13931	240	+	PR_intron	rna-XM_027470599.1	DDX31	NC_040063.1	6745004	6747122	peak_14569	2119	+	PR_intron	rna-XM_027470599.1
TTF1	TTF1	NC_040063.1	6863614	6864303	peak_13932	690	+	cds	rna-XM_027470594.1	TTF1	NC_040063.1	6863614	6864303	peak_14570	690	+	cds	rna-XM_027470594.1
SETX	SETX	NC_040063.1	6878101	6878221	peak_13933	121	+	cds	rna-XM_027471115.1	SETX	NC_040063.1	6878101	6878251	peak_14571	151	+	cds	rna-XM_027471115.1
RAPGEF1	RAPGEF1	NC_040063.1	7111013	7111194	peak_13938	182	+	utr5	rna-XM_027471085.1	RAPGEF1	NC_040063.1	7110983	7112821	peak_14577	1839	+	PR_intron	rna-XM_027471084.1
UBL3	UBL3	NC_040046.1	21432471	21432650	peak_1394	180	-	utr5	rna-XM_005018181.3	UBL3	NC_040046.1	21432441	21432680	peak_1484	240	-	utr5	rna-XM_005018181.3
UCK1	UCK1	NC_040063.1	7203938	7204088	peak_13942	151	+	utr3	rna-XM_027471116.1	UCK1	NC_040063.1	7203849	7204117	peak_14583	269	+	utr3	rna-XM_027471116.1
FAM78A	FAM78A	NC_040063.1	7302154	7302424	peak_13943	271	+	utr5	rna-XM_005013235.4	FAM78A	NC_040063.1	7302184	7302424	peak_14584	241	+	utr5	rna-XM_005013235.4
FNBP1	FNBP1	NC_040063.1	7702396	7702547	peak_13950	152	+	utr5	rna-XM_027471221.1	FNBP1	NC_040063.1	7702396	7702577	peak_14590	182	+	utr5	rna-XM_027471221.1
C18H9orf78	C18H9orf78	NC_040063.1	7823350	7826213	peak_13953	2864	+	PR_intron	rna-XM_027471230.1	C18H9orf78	NC_040063.1	7823321	7826213	peak_14593	2893	+	PR_intron	rna-XM_027471230.1
3a23bd32-4678-41f7-882a-fd6612a3b64a	3a23bd32-4678-41f7-882a-fd6612a3b64a	NC_040063.1	7833617	7834033	peak_13955	417	+	NP_exon	3a23bd32-4678-41f7-882a-fd6612a3b64a.trans	3a23bd32-4678-41f7-882a-fd6612a3b64a	NC_040063.1	7833647	7834003	peak_14595	357	+	NP_exon	3a23bd32-4678-41f7-882a-fd6612a3b64a.trans
5a36d0b2-8a36-4f7f-85d2-3adcafae42f4	5a36d0b2-8a36-4f7f-85d2-3adcafae42f4	NC_040063.1	7892807	7892927	peak_13958	121	+	NP_exon	5a36d0b2-8a36-4f7f-85d2-3adcafae42f4.trans	5a36d0b2-8a36-4f7f-85d2-3adcafae42f4	NC_040063.1	7892747	7893018	peak_14597	272	+	NP_exon	5a36d0b2-8a36-4f7f-85d2-3adcafae42f4.trans
KATNAL1	KATNAL1	NC_040046.1	21497415	21497476	peak_1396	62	-	cds	rna-XM_027465137.1	KATNAL1	NC_040046.1	21480289	21480530	peak_1486	242	-	utr3	rna-XM_027465137.1
e2ec6d1a-13ef-4b9e-9e2c-fc1fb22d3428	e2ec6d1a-13ef-4b9e-9e2c-fc1fb22d3428	NC_040063.1	8006445	8007215	peak_13962	771	+	NP_exon	e2ec6d1a-13ef-4b9e-9e2c-fc1fb22d3428.trans	e2ec6d1a-13ef-4b9e-9e2c-fc1fb22d3428	NC_040063.1	8006445	8007215	peak_14601	771	+	NP_exon	e2ec6d1a-13ef-4b9e-9e2c-fc1fb22d3428.trans
CRAT	CRAT	NC_040063.1	8051972	8052481	peak_13964	510	+	utr3	rna-XM_027470639.1	CRAT	NC_040063.1	8052002	8052063	peak_14603	62	+	utr3	rna-XM_027470639.1
DOLK	DOLK	NC_040063.1	8143711	8143981	peak_13965	271	+	cds	rna-XM_027470642.1	DOLK	NC_040063.1	8143771	8143981	peak_14605	211	+	cds	rna-XM_027470642.1
SPOUT1	SPOUT1	NC_040063.1	8191443	8191990	peak_13967	548	+	PR_intron	rna-XM_027471119.1	SPOUT1	NC_040063.1	8191443	8191960	peak_14606	518	+	PR_intron	rna-XM_027471119.1
HMGB1	HMGB1	NC_040046.1	21578850	21581186	peak_1397	2337	-	PR_intron	rna-XM_027469869.1	HMGB1	NC_040046.1	21578850	21581186	peak_1488	2337	-	PR_intron	rna-XM_027469869.1
WDR34	WDR34	NC_040063.1	8273934	8273994	peak_13970	61	+	utr5	rna-XM_021274580.2	WDR34	NC_040063.1	8294778	8294958	peak_14609	181	+	cds	rna-XM_027471034.1
C18H9orf16	C18H9orf16	NC_040063.1	8385591	8388443	peak_13972	2853	+	PR_intron	rna-XM_027471104.1	C18H9orf16	NC_040063.1	8385591	8388413	peak_14610	2823	+	PR_intron	rna-XM_027471104.1
DNM1	DNM1	NC_040063.1	8460767	8463465	peak_13973	2699	+	PR_intron	rna-XM_027471121.1	DNM1	NC_040063.1	8488945	8489096	peak_14611	152	+	utr3	rna-XM_027471121.1
MRPS2	MRPS2	NC_040063.1	8520562	8520859	peak_13975	298	+	cds	rna-XM_027470692.1	MRPS2	NC_040063.1	8520533	8520800	peak_14612	268	+	cds	rna-XM_027470692.1
NOTCH1	NOTCH1	NC_040063.1	8679330	8679511	peak_13976	182	+	cds	rna-XM_027471123.1	NOTCH1	NC_040063.1	8679090	8679181	peak_14614	92	+	cds	rna-XM_027471123.1
3f50d37a-8ae7-4dd6-bf24-eb637056bec5	3f50d37a-8ae7-4dd6-bf24-eb637056bec5	NC_040063.1	8684978	8685638	peak_13977	661	+	NP_exon	3f50d37a-8ae7-4dd6-bf24-eb637056bec5.trans	3f50d37a-8ae7-4dd6-bf24-eb637056bec5	NC_040063.1	8685068	8685698	peak_14616	631	+	NP_exon	3f50d37a-8ae7-4dd6-bf24-eb637056bec5.trans
SEC16A	SEC16A	NC_040063.1	8691618	8693282	peak_13981	1665	+	PR_intron	rna-XM_027470739.1	SEC16A	NC_040063.1	8691588	8691679	peak_14618	92	+	utr5	rna-XM_027470739.1
INPP5E	INPP5E	NC_040063.1	8727815	8729103	peak_13983	1289	+	PR_intron	rna-XM_027470750.1	INPP5E	NC_040063.1	8721745	8721986	peak_14622	242	+	cds	rna-XM_027470750.1
ENTR1	ENTR1	NC_040063.1	8738015	8738477	peak_13984	463	+	PR_intron	rna-XM_027470760.1	ENTR1	NC_040063.1	8738886	8739257	peak_14625	372	+	PR_intron	rna-XM_027470761.1
SNAPC4	SNAPC4	NC_040063.1	8748683	8749385	peak_13985	703	+	PR_intron	rna-XM_027470743.1	SNAPC4	NC_040063.1	8749033	8749326	peak_14626	294	+	cds	rna-XM_027470743.1
0fb6f1f0-c2ad-4491-8563-af5d52d1d690	0fb6f1f0-c2ad-4491-8563-af5d52d1d690	NC_040046.1	21721890	21722159	peak_1399	270	-	NP_exon	0fb6f1f0-c2ad-4491-8563-af5d52d1d690.trans	0fb6f1f0-c2ad-4491-8563-af5d52d1d690	NC_040046.1	21721860	21722129	peak_1490	270	-	NP_exon	0fb6f1f0-c2ad-4491-8563-af5d52d1d690.trans
CARD9	CARD9	NC_040063.1	8763317	8763437	peak_13990	121	+	cds	rna-XM_027470758.1	CARD9	NC_040063.1	8763257	8764022	peak_14630	766	+	PR_intron	rna-XM_027470758.1
LOC101793665	LOC101793665	NC_040063.1	8769887	8770848	peak_13991	962	+	NP_intron	rna-XR_003501009.1	LOC101793665	NC_040063.1	8769887	8770788	peak_14632	902	+	NP_intron	rna-XR_003501009.1
QSOX2	QSOX2	NC_040063.1	8917758	8918148	peak_13993	391	+	cds	rna-XM_027470711.1	QSOX2	NC_040063.1	8917758	8918148	peak_14634	391	+	cds	rna-XM_027470711.1
TMEM250	TMEM250	NC_040063.1	8983455	8983724	peak_13994	270	+	cds	rna-XM_027470862.1	TMEM250	NC_040063.1	8983396	8983724	peak_14635	329	+	cds	rna-XM_027470862.1
NACC2	NACC2	NC_040063.1	9032065	9032125	peak_13995	61	+	cds	rna-XM_027470683.1	NACC2	NC_040063.1	9032274	9032364	peak_14636	91	+	cds	rna-XM_027470683.1
CAMSAP1	CAMSAP1	NC_040063.1	9116644	9116914	peak_13998	271	+	cds	rna-XM_021276365.2	CAMSAP1	NC_040063.1	9116644	9116914	peak_14638	271	+	cds	rna-XM_021276365.2
CYTB	CYTB	NC_009684.1	15439	15850	peak_14	412	+	cds	gene-CYTB.trans	CYTB	NC_009684.1	15410	15850	peak_15	441	+	cds	gene-CYTB.trans
ATM	ATM	NC_040046.1	16320647	16320738	peak_140	92	+	utr3	rna-XM_021276610.2	ATM	NC_040046.1	16307061	16307717	peak_142	657	+	PR_intron	rna-XM_021276610.2
HSPH1	HSPH1	NC_040046.1	21721893	21726335	peak_1400	4443	-	PR_intron	rna-XM_027470001.1	HSPH1	NC_040046.1	21722808	21725433	peak_1492	2626	-	PR_intron	rna-XM_027470001.1
CNTRL	CNTRL	NC_040063.1	9324404	9324886	peak_14002	483	+	PR_intron	rna-XM_027471188.1	CNTRL	NC_040063.1	9321594	9321897	peak_14642	304	+	cds	rna-XM_027471188.1
DAB2IP	DAB2IP	NC_040063.1	9579433	9579494	peak_14009	62	+	PR_intron	rna-XM_027470776.1	DAB2IP	NC_040063.1	9593895	9596453	peak_14652	2559	+	PR_intron	rna-XM_027470776.1
N4BP2L1	N4BP2L1	NC_040046.1	22235106	22235585	peak_1401	480	-	utr3	rna-XM_005013788.4	N4BP2L1	NC_040046.1	22235256	22235585	peak_1493	330	-	utr3	rna-XM_005013788.4
LOC101799268	LOC101799268	NC_040063.1	9680168	9680883	peak_14016	716	+	PR_intron	rna-XM_027470955.1	LOC101799268	NC_040063.1	9680852	9681212	peak_14657	361	+	cds	rna-XM_027470955.1
MRRF	MRRF	NC_040063.1	9751353	9753291	peak_14019	1939	+	PR_intron	rna-XM_005029516.4	MRRF	NC_040063.1	9746316	9751383	peak_14659	5068	+	PR_intron	rna-XM_005029516.4
RABGAP1	RABGAP1	NC_040063.1	9823587	9829700	peak_14021	6114	+	PR_intron	rna-XM_027470903.1	RABGAP1	NC_040063.1	9823587	9829790	peak_14660	6204	+	PR_intron	rna-XM_027470903.1
NEK6	NEK6	NC_040063.1	10370304	10397720	peak_14025	27417	+	PR_intron	rna-XM_027470938.1	NEK6	NC_040063.1	10370304	10397720	peak_14664	27417	+	PR_intron	rna-XM_027470938.1
OLFML2A	OLFML2A	NC_040063.1	10604496	10604676	peak_14027	181	+	cds	rna-XM_027470831.1	OLFML2A	NC_040063.1	10604437	10604786	peak_14665	350	+	cds	rna-XM_027470831.1
GOLGA1	GOLGA1	NC_040063.1	10664799	10666884	peak_14029	2086	+	PR_intron	rna-XM_005024445.4	GOLGA1	NC_040063.1	10664799	10666445	peak_14667	1647	+	PR_intron	rna-XM_005024445.4
N4BP2L2	N4BP2L2	NC_040046.1	22261154	22280364	peak_1403	19211	-	PR_intron	rna-XM_027470087.1	N4BP2L2	NC_040046.1	22260706	22260796	peak_1495	91	-	cds	rna-XM_027470078.1
PBX3	PBX3	NC_040063.1	10833584	10834274	peak_14031	691	+	utr5	rna-XM_027470858.1	PBX3	NC_040063.1	10833524	10834244	peak_14669	721	+	utr5	rna-XM_027470858.1
ZBTB43	ZBTB43	NC_040063.1	11514488	11515028	peak_14035	541	+	cds	rna-XM_027470957.1	ZBTB43	NC_040063.1	11514488	11515117	peak_14674	630	+	cds	rna-XM_027470957.1
ZBTB34	ZBTB34	NC_040063.1	11522542	11522877	peak_14036	336	+	PR_intron	rna-XM_027470956.1	ZBTB34	NC_040063.1	11528511	11529020	peak_14675	510	+	cds	rna-XM_021275376.2
ABCA2	ABCA2	NC_040063.1	266961	267348	peak_14042	388	-	utr3	rna-XM_027470872.1	ABCA2	NC_040063.1	266931	267348	peak_14679	418	-	utr3	rna-XM_027470872.1
NPDC1	NPDC1	NC_040063.1	331353	331503	peak_14046	151	-	utr3	rna-XM_027470875.1	NPDC1	NC_040063.1	331323	331473	peak_14683	151	-	utr3	rna-XM_027470875.1
TRAF2	TRAF2	NC_040063.1	416883	417004	peak_14047	122	-	utr3	rna-XM_027471047.1	TRAF2	NC_040063.1	416853	416914	peak_14685	62	-	utr3	rna-XM_027471047.1
AJM1	AJM1	NC_040063.1	464527	464588	peak_14049	62	-	cds	rna-XM_021269033.2	AJM1	NC_040063.1	464557	464707	peak_14688	151	-	cds	rna-XM_021269033.2
STARD13	STARD13	NC_040046.1	22592209	22592448	peak_1405	240	-	utr3	rna-XM_027470162.1	STARD13	NC_040046.1	22592239	22592418	peak_1498	180	-	utr3	rna-XM_027470162.1
RABL6	RABL6	NC_040063.1	482751	485812	peak_14051	3062	-	PR_intron	rna-XM_013095019.3	RABL6	NC_040063.1	482751	485812	peak_14692	3062	-	PR_intron	rna-XM_013095019.3
NRARP	NRARP	NC_040063.1	559681	559890	peak_14055	210	-	utr3	rna-XM_013094986.2	NRARP	NC_040063.1	559591	559890	peak_14696	300	-	utr3	rna-XM_013094986.2
ae96ac1e-ae1f-4b06-814d-4458b008cd2e	ae96ac1e-ae1f-4b06-814d-4458b008cd2e	NC_040063.1	571918	572396	peak_14057	479	-	NP_exon	ae96ac1e-ae1f-4b06-814d-4458b008cd2e.trans	ae96ac1e-ae1f-4b06-814d-4458b008cd2e	NC_040063.1	572067	572396	peak_14698	330	-	NP_exon	ae96ac1e-ae1f-4b06-814d-4458b008cd2e.trans
EXD3	EXD3	NC_040063.1	571930	581169	peak_14058	9240	-	PR_intron	rna-XM_027470985.1	EXD3	NC_040063.1	572050	704006	peak_14699	131957	-	PR_intron	rna-XM_027470985.1
RNF208	RNF208	NC_040063.1	950755	950935	peak_14059	181	-	utr5	rna-XM_027470823.1	RNF208	NC_040063.1	946571	946720	peak_14700	150	-	utr3	rna-XM_027470823.1
2048adbb-a5f0-47f2-a22b-ab46ea84c1fe	2048adbb-a5f0-47f2-a22b-ab46ea84c1fe	NC_040046.1	22592744	22593042	peak_1406	299	-	NP_exon	2048adbb-a5f0-47f2-a22b-ab46ea84c1fe.trans	2048adbb-a5f0-47f2-a22b-ab46ea84c1fe	NC_040046.1	22592774	22593042	peak_1499	269	-	NP_exon	2048adbb-a5f0-47f2-a22b-ab46ea84c1fe.trans
LOC113845451	LOC113845451	NC_040063.1	963147	963328	peak_14060	182	-	PR_intron	rna-XM_027470821.1	LOC113845451	NC_040063.1	961318	961679	peak_14704	362	-	cds	rna-XM_027470821.1
c5b9e44c-be51-4d6a-8c44-28222444c842	c5b9e44c-be51-4d6a-8c44-28222444c842	NC_040063.1	1047860	1048101	peak_14062	242	-	NP_exon	c5b9e44c-be51-4d6a-8c44-28222444c842.trans	c5b9e44c-be51-4d6a-8c44-28222444c842	NC_040063.1	1047860	1048101	peak_14707	242	-	NP_exon	c5b9e44c-be51-4d6a-8c44-28222444c842.trans
ZNF618	ZNF618	NC_040063.1	1121988	1147713	peak_14064	25726	-	PR_intron	rna-XM_027471020.1	ZNF618	NC_040063.1	1121988	1156488	peak_14711	34501	-	PR_intron	rna-XM_027471020.1
RGS3	RGS3	NC_040063.1	1426829	1427069	peak_14065	241	-	utr3	rna-XM_021274352.2	RGS3	NC_040063.1	1426829	1427039	peak_14712	211	-	utr3	rna-XM_021274352.2
BSPRY	BSPRY	NC_040063.1	1524248	1524699	peak_14069	452	-	utr3	rna-XM_027470807.1	BSPRY	NC_040063.1	1524278	1524669	peak_14716	392	-	utr3	rna-XM_027470807.1
PRPF4	PRPF4	NC_040063.1	1552292	1552599	peak_14072	308	-	PR_intron	rna-XM_027470628.1	PRPF4	NC_040063.1	1553617	1554415	peak_14718	799	-	PR_intron	rna-XM_027470628.1
SLC31A1	SLC31A1	NC_040063.1	1559670	1559821	peak_14074	152	-	cds	rna-XM_027470633.1	SLC31A1	NC_040063.1	1559640	1559821	peak_14719	182	-	utr3	rna-XM_013106906.3
LRSAM1	LRSAM1	NC_040063.1	1616131	1621551	peak_14075	5421	-	PR_intron	rna-XM_027470577.1	LRSAM1	NC_040063.1	1613368	1613579	peak_14720	212	-	utr3	rna-XM_027470577.1
MRPL41	MRPL41	NC_040063.1	1673418	1673622	peak_14077	205	-	cds	rna-XM_027471108.1	MRPL41	NC_040063.1	1673418	1673622	peak_14723	205	-	cds	rna-XM_027471108.1
SSNA1	SSNA1	NC_040063.1	1894686	1895740	peak_14078	1055	-	PR_intron	rna-XM_027470952.1	SSNA1	NC_040063.1	1894180	1894270	peak_14724	91	-	PR_intron	rna-XM_027470953.1
TUBB4B	TUBB4B	NC_040063.1	2006581	2006817	peak_14079	237	-	cds	rna-XM_027471213.1	TUBB4B	NC_040063.1	2006551	2006817	peak_14726	267	-	cds	rna-XM_027471213.1
LOC101790941	LOC101790941	NC_040063.1	2018696	2018786	peak_14081	91	-	utr3	rna-XM_005027518.4	LOC101790941	NC_040063.1	2018278	2018338	peak_14728	61	-	utr3	rna-XM_005027518.4
TNC	TNC	NC_040063.1	2908511	2909051	peak_14082	541	-	cds	rna-XM_005022360.4	TNC	NC_040063.1	2863798	2863888	peak_14729	91	-	cds	rna-XM_005022360.4
BRINP1	BRINP1	NC_040063.1	4357780	4357931	peak_14086	152	-	utr3	rna-XM_027470799.1	BRINP1	NC_040063.1	4357870	4358409	peak_14734	540	-	cds	rna-XM_027470799.1
CDK5RAP2	CDK5RAP2	NC_040063.1	4910062	4912082	peak_14089	2021	-	PR_intron	rna-XM_021271206.2	CDK5RAP2	NC_040063.1	4910062	4912022	peak_14737	1961	-	PR_intron	rna-XM_021271206.2
MEGF9	MEGF9	NC_040063.1	4982535	4982775	peak_14095	241	-	utr3	rna-XM_027470705.1	MEGF9	NC_040063.1	4982535	4982745	peak_14744	211	-	utr3	rna-XM_027470705.1
NAIF1	NAIF1	NC_040063.1	5296114	5296624	peak_14100	511	-	cds	rna-XM_027471061.1	NAIF1	NC_040063.1	5294765	5294886	peak_14749	122	-	utr3	rna-XM_027471061.1
FPGS	FPGS	NC_040063.1	5331915	5332795	peak_14102	881	-	PR_intron	rna-XM_027471112.1	FPGS	NC_040063.1	5332706	5332795	peak_14752	90	-	utr5	rna-XM_027471112.1
CDK9	CDK9	NC_040063.1	5332564	5332862	peak_14103	299	-	utr3	rna-XM_027471132.1	CDK9	NC_040063.1	5332534	5332951	peak_14753	418	-	utr3	rna-XM_027471132.1
CERCAM	CERCAM	NC_040063.1	5376055	5376446	peak_14108	392	-	utr3	rna-XM_027471149.1	CERCAM	NC_040063.1	5376055	5376386	peak_14756	332	-	utr3	rna-XM_027471149.1
URM1	URM1	NC_040063.1	5392167	5393182	peak_14109	1016	-	PR_intron	rna-XM_027470625.1	URM1	NC_040063.1	5392167	5393211	peak_14758	1045	-	PR_intron	rna-XM_027470625.1
26b291d4-8756-4000-b8de-e42ba1d428f9	26b291d4-8756-4000-b8de-e42ba1d428f9	NC_040063.1	5415325	5415585	peak_14110	261	-	NP_exon	26b291d4-8756-4000-b8de-e42ba1d428f9.trans	26b291d4-8756-4000-b8de-e42ba1d428f9	NC_040063.1	5415325	5415527	peak_14759	203	-	NP_exon	26b291d4-8756-4000-b8de-e42ba1d428f9.trans
COQ4	COQ4	NC_040063.1	5431594	5431870	peak_14112	277	-	PR_intron	rna-XM_027470627.1	COQ4	NC_040063.1	5431564	5431870	peak_14761	307	-	PR_intron	rna-XM_027470627.1
PPP1R26	PPP1R26	NC_040063.1	5445332	5445453	peak_14113	122	-	PR_intron	rna-XM_021269242.2	PPP1R26	NC_040063.1	5446080	5446261	peak_14762	182	-	cds	rna-XM_021269242.2
OLFM1	OLFM1	NC_040063.1	5557309	5557519	peak_14118	211	-	cds	rna-XM_027470816.1	OLFM1	NC_040063.1	5557069	5557549	peak_14766	481	-	utr3	rna-XM_027470816.1
COL5A1	COL5A1	NC_040063.1	5634741	5635282	peak_14121	542	-	utr3	rna-XM_027471168.1	COL5A1	NC_040063.1	5634711	5635282	peak_14769	572	-	utr3	rna-XM_027471168.1
c1d0c671-20aa-4705-8c5b-b54c1ca490b3	c1d0c671-20aa-4705-8c5b-b54c1ca490b3	NC_040063.1	5882462	5882732	peak_14123	271	-	NP_exon	c1d0c671-20aa-4705-8c5b-b54c1ca490b3.trans	c1d0c671-20aa-4705-8c5b-b54c1ca490b3	NC_040063.1	5882462	5882702	peak_14771	241	-	NP_exon	c1d0c671-20aa-4705-8c5b-b54c1ca490b3.trans
WDR5	WDR5	NC_040063.1	6066283	6066932	peak_14127	650	-	PR_intron	rna-XM_027470842.1	WDR5	NC_040063.1	6066283	6066932	peak_14775	650	-	PR_intron	rna-XM_027470842.1
BRD3OS	BRD3OS	NC_040063.1	6127718	6127779	peak_14129	62	-	utr3	rna-XM_027470585.1	BRD3OS	NC_040063.1	6127718	6127779	peak_14776	62	-	utr3	rna-XM_027470585.1
NBEA	NBEA	NC_040046.1	23670668	23670788	peak_1413	121	-	PR_intron	rna-XM_027470271.1	NBEA	NC_040046.1	23670549	23671086	peak_1504	538	-	PR_intron	rna-XM_027470271.1
ADAMTSL2	ADAMTSL2	NC_040063.1	6349336	6349397	peak_14132	62	-	utr5	rna-XM_027470788.1	ADAMTSL2	NC_040063.1	6340403	6340584	peak_14779	182	-	cds	rna-XM_027470788.1
STKLD1	STKLD1	NC_040063.1	6441477	6442668	peak_14134	1192	-	PR_intron	rna-XM_027470717.1	STKLD1	NC_040063.1	6441477	6442638	peak_14780	1162	-	PR_intron	rna-XM_027470717.1
SURF2	SURF2	NC_040063.1	6456924	6459673	peak_14135	2750	-	PR_intron	rna-XM_027470726.1	SURF2	NC_040063.1	6456924	6459673	peak_14781	2750	-	PR_intron	rna-XM_027470726.1
LOC101791263	LOC101791263	NC_040063.1	6569361	6573509	peak_14136	4149	-	PR_intron	rna-XM_027470609.1	LOC101791263	NC_040063.1	6569302	6573539	peak_14782	4238	-	PR_intron	rna-XM_027470609.1
GTF3C4	GTF3C4	NC_040063.1	6734225	6734346	peak_14137	122	-	utr3	rna-XM_027470593.1	GTF3C4	NC_040063.1	6734195	6735376	peak_14783	1182	-	PR_intron	rna-XM_027470593.1
PRRC2B	PRRC2B	NC_040063.1	7222417	7222658	peak_14143	242	-	utr3	rna-XM_027471077.1	PRRC2B	NC_040063.1	7222447	7222658	peak_14789	212	-	utr3	rna-XM_027471077.1
SPART	SPART	NC_040046.1	24195772	24195892	peak_1415	121	-	cds	rna-XM_021271540.2	SPART	NC_040046.1	24195772	24198118	peak_1506	2347	-	PR_intron	rna-XM_021271540.2
PLPP7	PLPP7	NC_040063.1	7286882	7297168	peak_14151	10287	-	PR_intron	rna-XM_027471086.1	PLPP7	NC_040063.1	7286673	7286912	peak_14798	240	-	cds	rna-XM_027471086.1
NUP214	NUP214	NC_040063.1	7333173	7333444	peak_14153	272	-	cds	rna-XM_027471083.1	NUP214	NC_040063.1	7333173	7333444	peak_14800	272	-	cds	rna-XM_027471083.1
AIF1L	AIF1L	NC_040063.1	7376225	7380955	peak_14154	4731	-	PR_intron	rna-XM_027470841.1	AIF1L	NC_040063.1	7372066	7380955	peak_14802	8890	-	PR_intron	rna-XM_027470841.1
ABL1	ABL1	NC_040063.1	7427958	7428079	peak_14155	122	-	utr3	rna-XM_027471158.1	ABL1	NC_040063.1	7427241	7427302	peak_14805	62	-	utr3	rna-XM_027471158.1
FUBP3	FUBP3	NC_040063.1	7532050	7537934	peak_14163	5885	-	PR_intron	rna-XM_027470784.1	FUBP3	NC_040063.1	7532050	7537904	peak_14812	5855	-	PR_intron	rna-XM_027470784.1
NCS1	NCS1	NC_040063.1	7636009	7636250	peak_14165	242	-	utr3	rna-XM_027471232.1	NCS1	NC_040063.1	7636039	7636250	peak_14814	212	-	utr3	rna-XM_027471232.1
GPR107	GPR107	NC_040063.1	7664642	7671584	peak_14167	6943	-	PR_intron	rna-XM_027471229.1	GPR107	NC_040063.1	7664612	7671584	peak_14817	6973	-	PR_intron	rna-XM_027471229.1
USP20	USP20	NC_040063.1	7804913	7806188	peak_14168	1276	-	PR_intron	rna-XM_027471216.1	USP20	NC_040063.1	7804913	7806188	peak_14818	1276	-	PR_intron	rna-XM_027471216.1
SMAD9	SMAD9	NC_040046.1	24460874	24460994	peak_1417	121	-	utr3	rna-XM_027470553.1	SMAD9	NC_040046.1	24460695	24460845	peak_1507	151	-	utr3	rna-XM_027470553.1
TOR1B	TOR1B	NC_040063.1	7837649	7838362	peak_14170	714	-	PR_intron	rna-XM_027471191.1	TOR1B	NC_040063.1	7837020	7837171	peak_14820	152	-	utr3	rna-XM_027471191.1
NTMT1	NTMT1	NC_040063.1	7895081	7895322	peak_14171	242	-	utr3	rna-XM_027470844.1	NTMT1	NC_040063.1	7895141	7895322	peak_14825	182	-	utr3	rna-XM_027470844.1
DOLPP1	DOLPP1	NC_040063.1	8057615	8058655	peak_14172	1041	-	PR_intron	rna-XM_027470659.1	DOLPP1	NC_040063.1	8057734	8059362	peak_14826	1629	-	PR_intron	rna-XM_027470659.1
MIGA2	MIGA2	NC_040063.1	8086289	8087153	peak_14173	865	-	PR_intron	rna-XM_013093636.3	MIGA2	NC_040063.1	8086259	8087063	peak_14827	805	-	PR_intron	rna-XM_013093636.3
NUP188	NUP188	NC_040063.1	8113974	8114154	peak_14174	181	-	utr3	rna-XM_027470636.1	NUP188	NC_040063.1	8113944	8114214	peak_14828	271	-	utr3	rna-XM_027470636.1
LRRC8A	LRRC8A	NC_040063.1	8160863	8161134	peak_14176	272	-	utr3	rna-XM_027470672.1	LRRC8A	NC_040063.1	8161552	8161613	peak_14830	62	-	utr3	rna-XM_027470672.1
TBC1D13	TBC1D13	NC_040063.1	8201099	8201368	peak_14183	270	-	utr3	rna-XM_027470871.1	TBC1D13	NC_040063.1	8201099	8201398	peak_14836	300	-	utr3	rna-XM_027470871.1
PKN3	PKN3	NC_040063.1	8241231	8241412	peak_14186	182	-	utr3	rna-XM_005022684.4	PKN3	NC_040063.1	8241351	8241412	peak_14838	62	-	cds	rna-XM_005022684.4
SET	SET	NC_040063.1	8265869	8269094	peak_14188	3226	-	PR_intron	rna-XM_027471120.1	SET	NC_040063.1	8265899	8269094	peak_14840	3196	-	PR_intron	rna-XM_027471120.1
SPTAN1	SPTAN1	NC_040063.1	8303876	8304027	peak_14190	152	-	cds	rna-XM_027471031.1	SPTAN1	NC_040063.1	8303936	8303997	peak_14842	62	-	cds	rna-XM_027471031.1
GLE1	GLE1	NC_040063.1	8352541	8355450	peak_14195	2910	-	PR_intron	rna-XM_027471101.1	GLE1	NC_040063.1	8352541	8356349	peak_14847	3809	-	PR_intron	rna-XM_027471101.1
ODF2	ODF2	NC_040063.1	8359626	8361782	peak_14196	2157	-	PR_intron	rna-XM_027471100.1	ODF2	NC_040063.1	8359596	8361782	peak_14848	2187	-	PR_intron	rna-XM_027471100.1
PTGES2	PTGES2	NC_040063.1	8379004	8379273	peak_14199	270	-	utr3	rna-XM_027471103.1	PTGES2	NC_040063.1	8378974	8379273	peak_14851	300	-	utr3	rna-XM_027471103.1
DDX10	DDX10	NC_040046.1	16422699	16429947	peak_142	7249	+	PR_intron	rna-XM_027468537.1	DDX10	NC_040046.1	16422699	16429947	peak_143	7249	+	PR_intron	rna-XM_027468537.1
SUPT20H	SUPT20H	NC_040046.1	24555138	24555826	peak_1420	689	-	PR_intron	rna-XM_027470598.1	SUPT20H	NC_040046.1	24555168	24555796	peak_1510	629	-	PR_intron	rna-XM_027470598.1
CIZ1	CIZ1	NC_040063.1	8395189	8395722	peak_14200	534	-	PR_intron	rna-XM_027471102.1	CIZ1	NC_040063.1	8395189	8395722	peak_14852	534	-	PR_intron	rna-XM_027471102.1
GOLGA2	GOLGA2	NC_040063.1	8493415	8495587	peak_14202	2173	-	PR_intron	rna-XM_027470685.1	GOLGA2	NC_040063.1	8493415	8495587	peak_14854	2173	-	PR_intron	rna-XM_027470685.1
DIPK1B	DIPK1B	NC_040063.1	8529524	8529794	peak_14203	271	-	utr3	rna-XM_027470691.1	DIPK1B	NC_040063.1	8529853	8530243	peak_14858	391	-	cds	rna-XM_027470691.1
EGFL7	EGFL7	NC_040063.1	8568005	8577049	peak_14205	9045	-	PR_intron	rna-XM_027470694.1	EGFL7	NC_040063.1	8572391	8577049	peak_14859	4659	-	PR_intron	rna-XM_027470694.1
PMPCA	PMPCA	NC_040063.1	8730580	8730640	peak_14206	61	-	utr3	rna-XM_027470759.1	PMPCA	NC_040063.1	8730818	8731087	peak_14860	270	-	utr3	rna-XM_027470759.1
GPSM1	GPSM1	NC_040063.1	8775319	8775529	peak_14209	211	-	utr3	rna-XM_021274599.2	GPSM1	NC_040063.1	8776227	8776318	peak_14633	92	+	utr3	rna-XM_021274599.2
PHF19	PHF19	NC_040063.1	9226409	9226650	peak_14213	242	-	utr3	rna-XM_027470811.1	PHF19	NC_040063.1	9227038	9227339	peak_14865	302	-	utr3	rna-XM_027470811.1
TTLL11	TTLL11	NC_040063.1	9641296	9641569	peak_14215	274	-	cds	rna-XM_027471124.1	TTLL11	NC_040063.1	9640269	9641539	peak_14868	1271	-	PR_intron	rna-XM_027471124.1
PDCL	PDCL	NC_040063.1	9775015	9775135	peak_14217	121	-	utr3	rna-XM_027470924.1	PDCL	NC_040063.1	9775045	9775195	peak_14871	151	-	utr3	rna-XM_027470924.1
RC3H2	RC3H2	NC_040063.1	9801099	9801702	peak_14219	604	-	PR_intron	rna-XM_027470888.1	RC3H2	NC_040063.1	9794206	9794327	peak_14874	122	-	cds	rna-XM_027470888.1
POSTN	POSTN	NC_040046.1	24865787	24879018	peak_1422	13232	-	PR_intron	rna-XM_005018346.4	POSTN	NC_040046.1	24865787	24871384	peak_1512	5598	-	PR_intron	rna-XM_005018345.4
ZBTB6	ZBTB6	NC_040063.1	9814096	9814336	peak_14220	241	-	cds	rna-XM_013108512.3	ZBTB6	NC_040063.1	9813767	9813858	peak_14876	92	-	utr3	rna-XM_013108512.3
ZBTB26	ZBTB26	NC_040063.1	9816748	9817077	peak_14223	330	-	utr3	rna-XM_027470926.1	ZBTB26	NC_040063.1	9816748	9817107	peak_14879	360	-	utr3	rna-XM_027470926.1
STRBP	STRBP	NC_040063.1	9945632	9958497	peak_14228	12866	-	PR_intron	rna-XM_027470911.1	STRBP	NC_040063.1	9938636	9942753	peak_14887	4118	-	PR_intron	rna-XM_027470911.1
DENND1A	DENND1A	NC_040063.1	10036321	10036442	peak_14229	122	-	utr3	rna-XM_027470893.1	DENND1A	NC_040063.1	10036321	10036502	peak_14889	182	-	utr3	rna-XM_027470893.1
PROSER1	PROSER1	NC_040046.1	25708724	25708815	peak_1423	92	-	utr3	rna-XM_027470791.1	PROSER1	NC_040046.1	25708724	25708785	peak_1516	62	-	utr3	rna-XM_027470791.1
NR6A1	NR6A1	NC_040063.1	10537136	10541074	peak_14233	3939	-	PR_intron	rna-XM_027470916.1	NR6A1	NC_040063.1	10538998	10541044	peak_14892	2047	-	PR_intron	rna-XM_027470916.1
SCAI	SCAI	NC_040063.1	10618648	10618708	peak_14234	61	-	PR_intron	rna-XM_027471126.1	SCAI	NC_040063.1	10618648	10618708	peak_14893	61	-	PR_intron	rna-XM_027471126.1
ARPC5L	ARPC5L	NC_040063.1	10680410	10680586	peak_14235	177	-	utr3	rna-XM_021275628.2	ARPC5L	NC_040063.1	10680819	10682177	peak_14894	1359	-	PR_intron	rna-XM_021275628.2
GAPVD1	GAPVD1	NC_040063.1	10699812	10699993	peak_14237	182	-	utr3	rna-XM_027470702.1	GAPVD1	NC_040063.1	10699812	10699993	peak_14895	182	-	utr3	rna-XM_027470702.1
MAPKAP1	MAPKAP1	NC_040063.1	10731458	10733684	peak_14241	2227	-	PR_intron	rna-XM_027470853.1	MAPKAP1	NC_040063.1	10731458	10731905	peak_14897	448	-	utr3	rna-XM_027470853.1
GARNL3	GARNL3	NC_040063.1	11760882	11761092	peak_14245	211	-	utr5	rna-XM_027470976.1	GARNL3	NC_040063.1	11703194	11703374	peak_14901	181	-	utr3	rna-XM_027470976.1
PGS1	PGS1	NC_040064.1	290593	290773	peak_14250	181	+	cds	rna-XM_005011529.4	PGS1	NC_040064.1	290473	290832	peak_14907	360	+	cds	rna-XM_005011529.4
ASPSCR1	ASPSCR1	NC_040064.1	421675	421826	peak_14251	152	+	cds	rna-XM_027471570.1	ASPSCR1	NC_040064.1	421675	421826	peak_14908	152	+	cds	rna-XM_027471570.1
LRRC45	LRRC45	NC_040064.1	434789	439765	peak_14252	4977	+	PR_intron	rna-XM_027471581.1	LRRC45	NC_040064.1	433102	433304	peak_14909	203	+	PR_intron	rna-XM_027471581.1
RAC3	RAC3	NC_040064.1	447094	447244	peak_14254	151	+	utr3	rna-XM_027471589.1	RAC3	NC_040064.1	447124	447244	peak_14913	121	+	utr3	rna-XM_027471589.1
GPS1	GPS1	NC_040064.1	460532	460623	peak_14255	92	+	utr5	rna-XM_027471583.1	GPS1	NC_040064.1	460562	460652	peak_14914	91	+	PR_intron	rna-XM_027471584.1
SLC16A3	SLC16A3	NC_040064.1	584172	584472	peak_14256	301	+	cds	rna-XM_027471539.1	SLC16A3	NC_040064.1	584082	584233	peak_14915	152	+	cds	rna-XM_027471539.1
DGKE	DGKE	NC_040064.1	626409	626679	peak_14257	271	+	cds	rna-XM_005012260.4	DGKE	NC_040064.1	623272	623696	peak_14917	425	+	PR_intron	rna-XM_005012260.4
LOC101796539	LOC101796539	NC_040064.1	641073	641134	peak_14258	62	+	cds	rna-XM_027471618.1	LOC101796539	NC_040064.1	641193	641254	peak_14919	62	+	utr3	rna-XM_027471618.1
SCPEP1	SCPEP1	NC_040064.1	668113	668233	peak_14259	121	+	PR_intron	rna-XM_027471617.1	SCPEP1	NC_040064.1	668083	668748	peak_14921	666	+	PR_intron	rna-XM_027471617.1
LHFPL6	LHFPL6	NC_040046.1	25867181	25867391	peak_1426	211	-	utr3	rna-XM_027470840.1	LHFPL6	NC_040046.1	25867181	25867421	peak_1520	241	-	utr3	rna-XM_027470840.1
RAB11FIP4	RAB11FIP4	NC_040064.1	796364	799255	peak_14260	2892	+	PR_intron	rna-XM_027471625.1	RAB11FIP4	NC_040064.1	796275	799255	peak_14922	2981	+	PR_intron	rna-XM_027471625.1
SUZ12	SUZ12	NC_040064.1	1041711	1044772	peak_14262	3062	+	PR_intron	rna-XM_027471408.1	SUZ12	NC_040064.1	1041711	1044648	peak_14925	2938	+	PR_intron	rna-XM_027471408.1
ATAD5	ATAD5	NC_040064.1	1083718	1083899	peak_14264	182	+	cds	rna-XM_027471407.1	ATAD5	NC_040064.1	1083658	1083929	peak_14927	272	+	cds	rna-XM_027471407.1
ADAP2	ADAP2	NC_040064.1	1108779	1108928	peak_14270	150	+	cds	rna-XM_027471417.1	ADAP2	NC_040064.1	1108749	1108958	peak_14933	210	+	cds	rna-XM_027471417.1
RNF135	RNF135	NC_040064.1	1116261	1116322	peak_14271	62	+	cds	rna-XM_027471415.1	RNF135	NC_040064.1	1111339	1112670	peak_14934	1332	+	PR_intron	rna-XM_027471415.1
RHBDL3	RHBDL3	NC_040064.1	1212466	1212526	peak_14273	61	+	cds	rna-XM_027471643.1	RHBDL3	NC_040064.1	1212615	1212706	peak_14938	92	+	utr3	rna-XM_027471643.1
CEP95	CEP95	NC_040064.1	1442405	1442556	peak_14276	152	+	cds	rna-XM_027471659.1	CEP95	NC_040064.1	1437827	1438305	peak_14939	479	+	PR_intron	rna-XM_027471659.1
TBCD	TBCD	NC_040064.1	1899078	1899229	peak_14278	152	+	PR_intron	rna-XM_027471558.1	TBCD	NC_040064.1	1898958	1899019	peak_14942	62	+	PR_intron	rna-XM_027471558.1
RAB40B	RAB40B	NC_040064.1	1959556	1959617	peak_14279	62	+	utr5	rna-XM_027471474.1	RAB40B	NC_040064.1	1981236	1981506	peak_14944	271	+	cds	rna-XM_027471474.1
FOXO1	FOXO1	NC_040046.1	26316189	26317299	peak_1428	1111	-	cds	rna-XM_005014856.4	FOXO1	NC_040046.1	26315533	26315624	peak_1522	92	-	utr3	rna-XM_005014856.4
WDR45B	WDR45B	NC_040064.1	2000579	2000818	peak_14281	240	+	utr3	rna-XM_027471477.1	WDR45B	NC_040064.1	1984103	1984223	peak_14945	121	+	utr5	rna-XM_027471477.1
LOC101800628	LOC101800628	NC_040064.1	2114908	2116475	peak_14282	1568	+	PR_intron	rna-XM_005017921.4	LOC101800628	NC_040064.1	2114908	2116445	peak_14946	1538	+	PR_intron	rna-XM_005017921.4
OGFOD3	OGFOD3	NC_040064.1	2129945	2143769	peak_14283	13825	+	PR_intron	rna-XM_027471685.1	OGFOD3	NC_040064.1	2129945	2144452	peak_14947	14508	+	PR_intron	rna-XM_027471685.1
LOC101802295	LOC101802295	NC_040064.1	2172117	2172328	peak_14284	212	+	PR_intron	rna-XM_027471492.1	LOC101802295	NC_040064.1	2172267	2172328	peak_14948	62	+	PR_intron	rna-XM_013097951.3
TNRC6C	TNRC6C	NC_040064.1	2732952	2743165	peak_14286	10214	+	PR_intron	rna-XM_027471533.1	TNRC6C	NC_040064.1	2743044	2743135	peak_14950	92	+	PR_intron	rna-XM_027471533.1
MRPS31	MRPS31	NC_040046.1	26414146	26419802	peak_1429	5657	-	PR_intron	rna-XM_027470920.1	MRPS31	NC_040046.1	26414146	26421637	peak_1524	7492	-	PR_intron	rna-XM_027470920.1
JMJD6	JMJD6	NC_040064.1	3031144	3031354	peak_14294	211	+	cds	rna-XM_005014251.4	JMJD6	NC_040064.1	3031085	3031354	peak_14955	270	+	cds	rna-XM_005014251.4
MXRA7	MXRA7	NC_040064.1	3045935	3050742	peak_14296	4808	+	PR_intron	rna-XM_027471439.1	MXRA7	NC_040064.1	3045935	3050742	peak_14957	4808	+	PR_intron	rna-XM_027471439.1
ST6GALNAC1	ST6GALNAC1	NC_040064.1	3089946	3090127	peak_14298	182	+	cds	rna-XM_027471496.1	ST6GALNAC1	NC_040064.1	3089856	3090067	peak_14961	212	+	cds	rna-XM_027471496.1
CYGB	CYGB	NC_040064.1	3146091	3152229	peak_14299	6139	+	PR_intron	rna-XM_005014247.3	CYGB	NC_040064.1	3146091	3152229	peak_14964	6139	+	PR_intron	rna-XM_005014247.3
UBE2O	UBE2O	NC_040064.1	3189961	3190232	peak_14301	272	+	cds	rna-XM_027471696.1	UBE2O	NC_040064.1	3189931	3190202	peak_14966	272	+	cds	rna-XM_027471696.1
PRPSAP1	PRPSAP1	NC_040064.1	3277945	3278333	peak_14305	389	+	utr3	rna-XM_027471388.1	PRPSAP1	NC_040064.1	3277916	3278244	peak_14970	329	+	utr3	rna-XM_027471388.1
EXOC7	EXOC7	NC_040064.1	3331437	3331557	peak_14307	121	+	utr5	rna-XM_027471362.1	EXOC7	NC_040064.1	3333177	3333327	peak_14974	151	+	cds	rna-XM_027471362.1
SRP68	SRP68	NC_040064.1	3361987	3364945	peak_14310	2959	+	PR_intron	rna-XM_027471374.1	SRP68	NC_040064.1	3361987	3364945	peak_14975	2959	+	PR_intron	rna-XM_027471374.1
EVPL	EVPL	NC_040064.1	3391048	3392139	peak_14314	1092	+	PR_intron	rna-XM_027471348.1	EVPL	NC_040064.1	3393728	3394768	peak_14979	1041	+	PR_intron	rna-XM_027471348.1
ACOX1	ACOX1	NC_040064.1	3440912	3441062	peak_14318	151	+	utr3	rna-XM_027471370.1	ACOX1	NC_040064.1	3440972	3441033	peak_14983	62	+	utr3	rna-XM_027471370.1
FBF1	FBF1	NC_040064.1	3446497	3449384	peak_14319	2888	+	PR_intron	rna-XM_027471352.1	FBF1	NC_040064.1	3446497	3449414	peak_14984	2918	+	PR_intron	rna-XM_027471352.1
THSD1	THSD1	NC_040046.1	26476919	26477069	peak_1432	151	-	utr3	rna-XM_027470974.1	THSD1	NC_040046.1	26477396	26477784	peak_1525	389	-	cds	rna-XM_027470974.1
TRIM47	TRIM47	NC_040064.1	3468510	3468780	peak_14323	271	+	cds	rna-XM_027471293.1	TRIM47	NC_040064.1	3468510	3468751	peak_14988	242	+	cds	rna-XM_027471293.1
RECQL5	RECQL5	NC_040064.1	3643298	3644631	peak_14326	1334	+	PR_intron	rna-XM_027471252.1	RECQL5	NC_040064.1	3669570	3670914	peak_14991	1345	+	PR_intron	rna-XM_027471252.1
CASKIN2	CASKIN2	NC_040064.1	3832341	3832792	peak_14330	452	+	utr5	rna-XM_027471486.1	CASKIN2	NC_040064.1	3832341	3832522	peak_14995	182	+	utr5	rna-XM_027471486.1
GRB2	GRB2	NC_040064.1	3971921	3972161	peak_14335	241	+	utr3	rna-XM_005011998.4	GRB2	NC_040064.1	3971891	3972131	peak_15000	241	+	cds	rna-XM_005011998.4
SLC25A19	SLC25A19	NC_040064.1	3980366	3980577	peak_14337	212	+	utr3	rna-XM_027471688.1	SLC25A19	NC_040064.1	3981683	3981893	peak_15002	211	+	utr3	rna-XM_027471688.1
MIF4GD	MIF4GD	NC_040064.1	3987302	3988630	peak_14339	1329	+	PR_intron	rna-XM_027471630.1	MIF4GD	NC_040064.1	3987302	3988630	peak_15003	1329	+	PR_intron	rna-XM_027471630.1
GGA3	GGA3	NC_040064.1	3996193	4001680	peak_14341	5488	+	PR_intron	rna-XM_027471627.1	GGA3	NC_040064.1	3996223	3996283	peak_15004	61	+	utr5	rna-XM_027471627.1
SUMO2	SUMO2	NC_040064.1	4035758	4035818	peak_14346	61	+	utr5	rna-XM_027471718.1	SUMO2	NC_040064.1	4035876	4042487	peak_15007	6612	+	PR_intron	rna-XM_027471718.1
HID1	HID1	NC_040064.1	4137778	4137929	peak_14349	152	+	utr5	rna-XM_027471689.1	HID1	NC_040064.1	4137778	4137899	peak_15008	122	+	utr5	rna-XM_027471689.1
NAT9	NAT9	NC_040064.1	4292953	4294680	peak_14352	1728	+	PR_intron	rna-XM_027471479.1	NAT9	NC_040064.1	4292923	4294680	peak_15010	1758	+	PR_intron	rna-XM_027471479.1
LOC101790381	LOC101790381	NC_040064.1	4671382	4672226	peak_14353	845	+	PR_intron	rna-XM_027471235.1	LOC101790381	NC_040064.1	4671382	4672226	peak_15011	845	+	PR_intron	rna-XM_027471235.1
f7a6ddf5-ea9d-4045-9394-35c88c93f055	f7a6ddf5-ea9d-4045-9394-35c88c93f055	NC_040064.1	4804390	4804659	peak_14354	270	+	NP_exon	f7a6ddf5-ea9d-4045-9394-35c88c93f055.trans	f7a6ddf5-ea9d-4045-9394-35c88c93f055	NC_040064.1	4804331	4804838	peak_15012	508	+	NP_exon	f7a6ddf5-ea9d-4045-9394-35c88c93f055.trans
STX8	STX8	NC_040064.1	5213347	5226078	peak_14357	12732	+	PR_intron	rna-XM_027471681.1	STX8	NC_040064.1	5213157	5227795	peak_15014	14639	+	PR_intron	rna-XM_027471681.1
PIK3R5	PIK3R5	NC_040064.1	5457777	5457868	peak_14358	92	+	cds	rna-XM_027471396.1	PIK3R5	NC_040064.1	5457777	5457928	peak_15015	152	+	cds	rna-XM_027471396.1
VPS36	VPS36	NC_040046.1	26509266	26509417	peak_1436	152	-	utr3	rna-XM_005014858.4	VPS36	NC_040046.1	26509236	26509417	peak_1528	182	-	utr3	rna-XM_005014858.4
LOC101790890	LOC101790890	NC_040064.1	5528975	5532640	peak_14364	3666	+	PR_intron	rna-XM_027471471.1	LOC101790890	NC_040064.1	5523859	5533011	peak_15017	9153	+	PR_intron	rna-XM_027471471.1
MYH10	MYH10	NC_040064.1	5597184	5600062	peak_14367	2879	+	PR_intron	rna-XM_027471553.1	MYH10	NC_040064.1	5597184	5600033	peak_15020	2850	+	PR_intron	rna-XM_027471553.1
SHISA6	SHISA6	NC_040064.1	6249120	6260074	peak_14373	10955	+	PR_intron	rna-XM_027471240.1	SHISA6	NC_040064.1	6249120	6260104	peak_15025	10985	+	PR_intron	rna-XM_027471240.1
MYOCD	MYOCD	NC_040064.1	6764512	6764753	peak_14376	242	+	cds	rna-XM_027471506.1	MYOCD	NC_040064.1	6764452	6764753	peak_15028	302	+	cds	rna-XM_027471506.1
LOC101790131	LOC101790131	NC_040064.1	6905164	6909748	peak_14378	4585	+	PR_intron	rna-XM_027471690.1	LOC101790131	NC_040064.1	6905134	6909240	peak_15033	4107	+	PR_intron	rna-XM_027471690.1
LOC101790909	LOC101790909	NC_040064.1	6949326	6949746	peak_14379	421	+	PR_intron	rna-XM_027471549.1	LOC101790909	NC_040064.1	6949326	6949595	peak_15035	270	+	cds	rna-XM_027471549.1
LOC110353953	LOC110353953	NC_040064.1	6998310	6998401	peak_14385	92	+	cds	rna-XM_027471548.1	LOC110353953	NC_040064.1	6998195	6998401	peak_15041	207	+	cds	rna-XM_027471548.1
ALG11	ALG11	NC_040046.1	26580252	26580342	peak_1439	91	-	cds	rna-XM_005014860.4	ALG11	NC_040046.1	26580133	26580401	peak_1532	269	-	cds	rna-XM_005014860.4
LOC101802071	LOC101802071	NC_040064.1	7032303	7034363	peak_14391	2061	+	PR_intron	rna-XM_027471691.1	LOC101802071	NC_040064.1	7032303	7034363	peak_15049	2061	+	PR_intron	rna-XM_027471691.1
HLF	HLF	NC_040064.1	8035889	8037057	peak_14392	1169	+	PR_intron	rna-XM_027471458.1	HLF	NC_040064.1	8036936	8037147	peak_15051	212	+	cds	rna-XM_027471458.1
MBTD1	MBTD1	NC_040064.1	8508678	8508739	peak_14395	62	+	cds	rna-XM_027471706.1	MBTD1	NC_040064.1	8510391	8510452	peak_15054	62	+	cds	rna-XM_027471706.1
SPAG9	SPAG9	NC_040064.1	8539158	8565664	peak_14397	26507	+	PR_intron	rna-XM_027471262.1	SPAG9	NC_040064.1	8539247	8565664	peak_15056	26418	+	PR_intron	rna-XM_027471262.1
WDFY2	WDFY2	NC_040046.1	26721083	26721203	peak_1440	121	-	utr3	rna-XM_027471098.1	WDFY2	NC_040046.1	26721024	26721945	peak_1534	922	-	PR_intron	rna-XM_027471098.1
[truncated: 5,704 more rows]
