# Supplementary material for: Profiling Analysis of N6-Methyladenosine mRNA Methylation Reveals Differential m6A Patterns during the Embryonic Skeletal Muscle Development of Ducks
Source: Animals (Basel). 2022 Sep 28;12(19):2593. doi: 10.3390/ani12192593 (PMC9559603; doi:10.3390/ani12192593)
Supplement: Supplementary file 1 [file animals-12-02593-s001.zip › Table S3.xls]

Geneid	Chr	Start	End	PeakID	Length	Strand	Annotation	Annotated_Transcript
ND1	NC_009684.1	4121	4182	peak_1	62	+	cds	gene-ND1.trans
TMEM126A	NC_040046.1	7102420	7103531	peak_100	1112	+	PR_intron	rna-XM_027462586.1
RNF2	NC_040053.1	21395204	21396169	peak_10000	966	+	PR_intron	rna-XM_027463661.1
RNF2	NC_040053.1	21398113	21398234	peak_10001	122	+	utr3	rna-XM_027463661.1
ODR4	NC_040053.1	21874147	21874856	peak_10007	710	+	PR_intron	rna-XM_013108143.3
NPHS2	NC_040053.1	25301392	25302094	peak_10044	703	+	NP_intron	rna-XR_002402044.2
e414c170-6eaf-4ed6-9b93-bc8345118f1f	NC_040053.1	25850885	25850976	peak_10067	92	+	NP_exon	e414c170-6eaf-4ed6-9b93-bc8345118f1f.trans
VAMP4	NC_040053.1	26934739	26936307	peak_10094	1569	+	PR_intron	rna-XM_027463111.1
LOC101801487	NC_040053.1	26966966	26967026	peak_10096	61	+	cds	rna-XM_027463113.1
LOC101801487	NC_040053.1	27009972	27013395	peak_10097	3424	+	PR_intron	rna-XM_027463113.1
LOC113844324	NC_040053.1	27146579	27146640	peak_10098	62	+	PR_intron	rna-XM_027463117.1
TMEM121	NC_040053.1	27853540	27858905	peak_10116	5366	+	PR_intron	rna-XM_027463069.1
TMEM121	NC_040053.1	27870140	27870351	peak_10117	212	+	cds	rna-XM_027463068.1
TMEM121	NC_040053.1	27871368	27871728	peak_10119	361	+	cds	rna-XM_027463068.1
20f18cb4-e74a-4be4-91c1-99b2fdfc8ccf	NC_040053.1	27916635	27916844	peak_10121	210	+	NP_exon	20f18cb4-e74a-4be4-91c1-99b2fdfc8ccf.trans
20f18cb4-e74a-4be4-91c1-99b2fdfc8ccf	NC_040053.1	27916639	27916845	peak_10122	207	+	NP_exon	20f18cb4-e74a-4be4-91c1-99b2fdfc8ccf.trans
UHMK1	NC_040053.1	27925791	27925851	peak_10123	61	+	cds	rna-XM_027462867.1
HSD17B7	NC_040053.1	27965013	27965192	peak_10125	180	+	utr3	rna-XM_027463235.1
SLC25A24	NC_040053.1	31114509	31114569	peak_10154	61	+	cds	rna-XM_027463683.1
SLC25A24	NC_040053.1	31122870	31122960	peak_10155	91	+	cds	rna-XM_027463683.1
GPR88	NC_040053.1	33336201	33336382	peak_10164	182	+	cds	rna-XM_027462590.1
GPR88	NC_040053.1	33336590	33336771	peak_10165	182	+	cds	rna-XM_027462590.1
GPR88	NC_040053.1	33337969	33338180	peak_10166	212	+	utr3	rna-XM_027462590.1
DBT	NC_040053.1	33427095	33427186	peak_10168	92	+	utr3	rna-XM_027463036.1
FAM13C	NC_040053.1	1367666	1367787	peak_10194	122	-	utr5	rna-XM_027463249.1
DNAJC6	NC_040053.1	6288402	6288612	peak_10230	211	-	utr3	rna-XM_027462398.1
PATJ	NC_040053.1	7338742	7341337	peak_10240	2596	-	PR_intron	rna-XM_027462631.1
PATJ	NC_040053.1	7378098	7381477	peak_10241	3380	-	PR_intron	rna-XM_027462631.1
PATJ	NC_040053.1	7387570	7388498	peak_10242	929	-	PR_intron	rna-XM_027462631.1
LRP8	NC_040053.1	10036188	10036408	peak_10257	221	-	PR_intron	rna-NM_001310356.1
RPS8	NC_040053.1	14616827	14616973	peak_10296	147	-	cds	rna-XM_027462755.1
TMEM135	NC_040046.1	7570316	7570437	peak_103	122	+	utr3	rna-XM_021277650.2
LOC113844296	NC_040053.1	15849097	15849188	peak_10316	92	-	utr3	rna-XM_027462745.1
LOC113843015	NC_040046.1	159113011	159113161	peak_1032	151	+	utr5	rna-XM_027452963.1
USP33	NC_040053.1	16568648	16568769	peak_10324	122	-	cds	rna-XM_005010311.4
PDC	NC_040053.1	21888560	21888680	peak_10363	121	-	utr3	rna-XM_005029047.4
NPL	NC_040053.1	23785987	23786078	peak_10374	92	-	PR_intron	rna-XM_027463846.1
ASTN1	NC_040053.1	24574479	24574630	peak_10381	152	-	utr3	rna-XM_027462844.1
ASTN1	NC_040053.1	24574689	24574870	peak_10382	182	-	utr3	rna-XM_027462844.1
LOC101799094	NC_040046.1	159322820	159322881	peak_1041	62	+	cds	rna-XM_027453333.1
METTL18	NC_040053.1	26510082	26510143	peak_10414	62	-	utr3	rna-XM_027463597.1
dfba8325-90e2-4015-a19e-e440950168ec	NC_040053.1	26931201	26931261	peak_10419	61	-	NP_exon	dfba8325-90e2-4015-a19e-e440950168ec.trans
TADA1	NC_040053.1	27368157	27368336	peak_10422	180	-	utr3	rna-XM_013096009.3
LOC113844379	NC_040053.1	28068567	28068778	peak_10444	212	-	utr3	rna-XM_027463631.1
GPSM2	NC_040053.1	30978571	30978971	peak_10474	401	-	PR_intron	rna-XM_027463669.1
GPSM2	NC_040053.1	30987927	30988936	peak_10475	1010	-	PR_intron	rna-XM_027463672.1
PLPPR5	NC_040053.1	33753738	33754306	peak_10490	569	-	PR_intron	rna-XM_027462608.1
TTC26	NC_040046.1	160096789	160104743	peak_1050	7955	+	PR_intron	rna-XM_027453551.1
EPHX4	NC_040053.1	35924405	35924496	peak_10519	92	-	cds	rna-XM_027463481.1
LOC101795602	NC_040054.1	28210	28330	peak_10523	121	+	cds	rna-XM_027464526.1
MME	NC_040054.1	1141324	1141505	peak_10537	182	+	PR_intron	rna-XM_021275193.2
MFSD1	NC_040054.1	1942862	1942923	peak_10546	62	+	utr3	rna-XM_027464712.1
LOC101795342	NC_040054.1	4319906	4321288	peak_10555	1383	+	PR_intron	rna-XM_027464167.1
LOC101795342	NC_040054.1	4321407	4321588	peak_10556	182	+	utr3	rna-XM_027464167.1
SOX2	NC_040054.1	8162142	8162262	peak_10588	121	+	NP_intron	rna-XR_003499127.1
SOX2	NC_040054.1	8163475	8163536	peak_10589	62	+	NP_intron	rna-XR_003499122.1
CAPN10	NC_040054.1	9417711	9419039	peak_10602	1329	+	PR_intron	rna-XM_027464195.1
CAPN10	NC_040054.1	9427305	9427514	peak_10603	210	+	utr3	rna-XM_027464195.1
LOC101801861	NC_040054.1	9482365	9482425	peak_10604	61	+	cds	rna-XM_027464232.1
TP63	NC_040054.1	11184531	11212804	peak_10618	28274	+	PR_intron	rna-XM_027464041.1
HRASLS	NC_040054.1	12232634	12232695	peak_10626	62	+	utr3	rna-XM_027464115.1
PARL	NC_040054.1	13829116	13829206	peak_10641	91	+	utr3	rna-XM_027464298.1
AMER3	NC_040054.1	13989349	13989439	peak_10646	91	+	cds	rna-XM_013094594.3
ATG4B	NC_040054.1	14831446	14831597	peak_10662	152	+	utr3	rna-XM_027464851.1
NRROS	NC_040054.1	14968801	14968951	peak_10671	151	+	utr3	rna-XM_021277858.2
TBCCD1	NC_040054.1	15354529	15354709	peak_10677	181	+	cds	rna-XM_027464596.1
SOX14	NC_040054.1	15514951	15515012	peak_10678	62	+	cds	rna-XM_005019391.4
SOX14	NC_040054.1	15515100	15515250	peak_10679	151	+	cds	rna-XM_005019391.4
PCCB	NC_040054.1	16512199	16512494	peak_10688	296	+	PR_intron	rna-XM_027464651.1
EFHD1	NC_040054.1	16775381	16775562	peak_10693	182	+	cds	rna-XM_027464297.1
EFHD1	NC_040054.1	16788608	16789922	peak_10694	1315	+	PR_intron	rna-XM_027464297.1
OTOS	NC_040054.1	18128530	18128591	peak_10713	62	+	utr5	rna-XM_027464066.1
MFF	NC_040054.1	22880499	22880648	peak_10735	150	+	utr3	rna-XM_027464700.1
GABRB2	NC_040054.1	25879796	25879857	peak_10753	62	+	cds	rna-XM_013098835.3
TM4SF18	NC_040054.1	73527	73647	peak_10754	121	-	NP_exon	rna-XR_001192422.3
SHISA8	NC_040046.1	160593741	160593832	peak_1078	92	+	utr5	rna-XM_027453930.1
LOC101801425	NC_040054.1	2438445	2438536	peak_10790	92	-	utr3	rna-XM_027464523.1
PMM1	NC_040046.1	160694982	160695281	peak_1080	300	+	utr3	rna-XM_027454035.1
DEUP1	NC_040046.1	10190430	10190580	peak_109	151	+	cds	rna-XM_027467337.1
DTYMK	NC_040054.1	14842626	14842747	peak_10913	122	-	cds	rna-XM_027464853.1
VPS8	NC_040054.1	16247284	16247464	peak_10950	181	-	utr3	rna-XM_027464010.1
32f1b8b5-058d-423f-8980-7d98c545c151	NC_040054.1	18141262	18141352	peak_10987	91	-	NP_exon	32f1b8b5-058d-423f-8980-7d98c545c151.trans
32f1b8b5-058d-423f-8980-7d98c545c151	NC_040054.1	18141261	18141321	peak_10988	61	-	NP_exon	32f1b8b5-058d-423f-8980-7d98c545c151.trans
PAX3	NC_040054.1	21156833	21206086	peak_11007	49254	-	PR_intron	rna-XM_027463870.1
WDFY1	NC_040054.1	21605835	21605926	peak_11009	92	-	utr3	rna-XM_027463972.1
SERPINE2	NC_040054.1	21644964	21646256	peak_11010	1293	-	PR_intron	rna-XM_013105920.2
COL4A4	NC_040054.1	22733037	22733098	peak_11017	62	-	cds	rna-XM_027464697.1
COL4A4	NC_040054.1	22746303	22747384	peak_11018	1082	-	PR_intron	rna-XM_027464697.1
SPHKAP	NC_040054.1	23025551	23025732	peak_11019	182	-	cds	rna-XM_027464601.1
SPHKAP	NC_040054.1	23026060	23026211	peak_11020	152	-	cds	rna-XM_027464601.1
PCOLCE2	NC_040054.1	24129816	24129935	peak_11037	120	-	utr3	rna-XM_027464108.1
PAQR9	NC_040054.1	24189028	24189208	peak_11038	181	-	cds	rna-XM_013109196.2
GABRA1	NC_040054.1	25565510	25565660	peak_11040	151	-	cds	rna-XM_013098850.3
CCNJL	NC_040055.1	39763	46751	peak_11044	6989	+	PR_intron	rna-XM_013093936.3
b247677f-f784-4311-ad9f-46241127a24a	NC_040055.1	3550051	3550442	peak_11074	392	+	NP_exon	b247677f-f784-4311-ad9f-46241127a24a.trans
b247677f-f784-4311-ad9f-46241127a24a	NC_040055.1	3550028	3550446	peak_11076	419	+	NP_exon	b247677f-f784-4311-ad9f-46241127a24a.trans
PGK1	NC_040055.1	5094074	5094135	peak_11103	62	+	utr5	rna-XM_005015196.3
LOC101802277	NC_040055.1	11030032	11030152	peak_11172	121	+	utr3	rna-XM_027465202.1
LOC101802277	NC_040055.1	11030030	11030180	peak_11173	151	+	utr3	rna-XM_027465202.1
LOC101801610	NC_040055.1	12487680	12487801	peak_11192	122	+	utr3	rna-XM_005031178.3
VGLL1	NC_040055.1	14011407	14011468	peak_11203	62	+	utr3	rna-XM_021275255.2
ZIC3	NC_040055.1	14240000	14240121	peak_11204	122	+	cds	rna-XM_013103570.3
ZIC3	NC_040055.1	14241650	14241891	peak_11205	242	+	utr3	rna-XM_013103570.3
ARHGEF37	NC_040055.1	728427	728756	peak_11235	330	-	utr3	rna-XM_027465133.1
ARHGEF37	NC_040055.1	728934	728995	peak_11236	62	-	utr3	rna-XM_027465133.1
ATP1B4	NC_040055.1	3489012	3491142	peak_11262	2131	-	PR_intron	rna-XM_005022118.4
LOC101797872	NC_040055.1	4414771	4415008	peak_11272	238	-	PR_intron	rna-XM_027465177.1
FAAH2	NC_040055.1	6392915	6393065	peak_11302	151	-	utr3	rna-XM_027465126.1
FAM19A2	NC_040046.1	168718642	168718703	peak_1132	62	+	utr3	rna-XM_027456517.1
DRP2	NC_040055.1	11322061	11322182	peak_11362	122	-	utr3	rna-XM_027465221.1
MPP1	NC_040055.1	11402478	11402687	peak_11366	210	-	utr3	rna-XM_027464895.1
MPP1	NC_040055.1	11402925	11402985	peak_11367	61	-	utr3	rna-XM_027464895.1
IL13RA2	NC_040055.1	12183290	12183561	peak_11395	272	-	utr3	rna-XM_027465380.1
GPC3	NC_040055.1	13401246	13401307	peak_11405	62	-	PR_intron	rna-XM_005023811.4
GPC3	NC_040055.1	13410608	13430438	peak_11406	19831	-	PR_intron	rna-XM_005023811.4
GPC3	NC_040055.1	13464591	13464771	peak_11407	181	-	cds	rna-XM_005023811.4
UNC45A	NC_040056.1	283610	283759	peak_11461	150	+	cds	rna-XM_027466657.1
ITGA11	NC_040056.1	1434452	1434513	peak_11488	62	+	cds	rna-XM_027465968.1
ITGA11	NC_040056.1	1455136	1455287	peak_11489	152	+	utr3	rna-XM_027465968.1
TIPIN	NC_040056.1	2256833	2257012	peak_11492	180	+	utr3	rna-XM_027466492.1
CERS3	NC_040056.1	3512662	3512813	peak_11514	152	+	utr3	rna-XM_027465762.1
CERS3	NC_040056.1	3515030	3515421	peak_11515	392	+	utr3	rna-XM_027465762.1
ABHD17C	NC_040056.1	8847067	8847278	peak_11558	212	+	cds	rna-XM_005027154.3
CFAP161	NC_040056.1	9058191	9058676	peak_11563	486	+	PR_intron	rna-XM_027466401.1
SAXO2	NC_040056.1	9608991	9610162	peak_11564	1172	+	PR_intron	rna-XM_027466451.1
BNC1	NC_040056.1	10001813	10002053	peak_11569	241	+	cds	rna-XM_027466063.1
IMMP2L	NC_040046.1	174114219	174114340	peak_1157	122	+	PR_intron	rna-XM_027457316.1
BNC1	NC_040056.1	10002532	10002683	peak_11570	152	+	cds	rna-XM_013106366.3
BNC1	NC_040056.1	10002802	10003102	peak_11571	301	+	PR_intron	rna-XM_027466063.1
BNC1	NC_040056.1	10005377	10005887	peak_11572	511	+	cds	rna-XM_013106366.3
ZNF277	NC_040046.1	174626601	174626692	peak_1158	92	+	utr3	rna-XM_027455478.1
NR2E3	NC_040056.1	11426959	11427020	peak_11595	62	+	cds	rna-XM_027466553.1
LOC101795772	NC_040056.1	12496490	12496581	peak_11613	92	+	cds	rna-XM_027466240.1
NRG4	NC_040056.1	13749218	13749309	peak_11648	92	+	cds	rna-XM_027466613.1
CHRNB4	NC_040056.1	13887538	13887838	peak_11649	301	+	cds	rna-XM_005027920.4
TRPM1	NC_040056.1	16204176	16205496	peak_11675	1321	+	PR_intron	rna-XM_013104968.3
TRPM1	NC_040056.1	16211859	16211950	peak_11676	92	+	cds	rna-XM_013104968.3
TRPM1	NC_040056.1	16225690	16225811	peak_11677	122	+	cds	rna-XM_013104968.3
TRPM1	NC_040056.1	16226289	16226469	peak_11678	181	+	cds	rna-XM_013104968.3
MCEE	NC_040056.1	16300065	16304794	peak_11680	4730	+	PR_intron	rna-XM_027466202.1
OSGIN1	NC_040056.1	16772671	16772970	peak_11683	300	+	cds	rna-XM_027466237.1
OSGIN1	NC_040056.1	16773327	16773417	peak_11684	91	+	cds	rna-XM_027466237.1
FA2H	NC_040056.1	17560094	17560155	peak_11707	62	+	cds	rna-XM_027466374.1
LCAT	NC_040056.1	18507849	18507968	peak_11731	120	+	cds	rna-NM_001310370.1
LCAT	NC_040056.1	18507853	18507972	peak_11733	120	+	cds	rna-NM_001310370.1
CIAPIN1	NC_040056.1	19385588	19385648	peak_11758	61	+	cds	rna-XM_027465751.1
ZFPM1	NC_040056.1	20140619	20154576	peak_11778	13958	+	PR_intron	rna-XM_027466384.1
LOC101797519	NC_040046.1	180013393	180031996	peak_1184	18604	+	PR_intron	rna-XM_027458140.1
VPS33B	NC_040056.1	298531	298744	peak_11855	214	-	PR_intron	rna-XM_027466660.1
CORO2B	NC_040056.1	1353152	1353213	peak_11879	62	-	utr3	rna-XM_027466203.1
IQCH	NC_040056.1	1776552	1777095	peak_11885	544	-	PR_intron	rna-XM_027466459.1
LOC101795178	NC_040056.1	1974422	1974598	peak_11889	177	-	cds	rna-XM_005031474.2
MTFMT	NC_040056.1	2959867	2959956	peak_11893	90	-	cds	rna-XM_027465768.1
PGPEP1L	NC_040056.1	4182728	4186131	peak_11919	3404	-	PR_intron	rna-XM_027466231.1
MCTP2	NC_040056.1	5840506	5840687	peak_11925	182	-	utr3	rna-XM_021266638.2
MCTP2	NC_040056.1	5841523	5844013	peak_11926	2491	-	PR_intron	rna-XM_021266638.2
MCTP2	NC_040056.1	5942832	5943012	peak_11927	181	-	cds	rna-XM_027466045.1
MCTP2	NC_040056.1	5960271	5960677	peak_11928	407	-	PR_intron	rna-XM_021266638.2
SH3GL3	NC_040056.1	9849949	9885123	peak_11975	35175	-	PR_intron	rna-XM_027466454.1
SORD	NC_040056.1	11037054	11037114	peak_12000	61	-	utr3	rna-XM_027466125.1
LOC106016299	NC_040056.1	11422527	11422618	peak_12012	92	-	utr5	rna-XM_027466549.1
a8ceebf4-7eea-40a5-a2ec-935e112fb519	NC_040056.1	12452624	12452774	peak_12025	151	-	NP_exon	a8ceebf4-7eea-40a5-a2ec-935e112fb519.trans
MPI	NC_040056.1	12505183	12505244	peak_12031	62	-	utr3	rna-XM_027466037.1
CCDC33	NC_040056.1	12668939	12669270	peak_12035	332	-	PR_intron	rna-XM_027466309.1
ISLR	NC_040056.1	12706747	12706927	peak_12036	181	-	utr3	rna-XM_027466312.1
ISLR	NC_040056.1	12708991	12709897	peak_12037	907	-	PR_intron	rna-XM_027466312.1
IREB2	NC_040056.1	13944162	13944403	peak_12068	242	-	utr3	rna-XM_027466466.1
LAMB4	NC_040046.1	187951919	187953559	peak_1209	1641	+	PR_intron	rna-XM_027459019.1
HSD11B2	NC_040056.1	18111947	18112155	peak_12116	209	-	utr3	rna-XM_027465620.1
TSNAXIP1	NC_040056.1	18696368	18696548	peak_12144	181	-	cds	rna-XM_027466076.1
NLRC5	NC_040056.1	18969403	18969463	peak_12147	61	-	cds	rna-XM_013099982.3
NDRG4	NC_040056.1	19080439	19080530	peak_12154	92	-	utr3	rna-XM_013099997.2
287b79d8-bc1c-4ce4-9aa7-1836bab4f92b	NC_040056.1	19197095	19197602	peak_12157	508	-	NP_exon	287b79d8-bc1c-4ce4-9aa7-1836bab4f92b.trans
287b79d8-bc1c-4ce4-9aa7-1836bab4f92b	NC_040056.1	19197097	19197920	peak_12158	824	-	NP_exon	287b79d8-bc1c-4ce4-9aa7-1836bab4f92b.trans
DRC7	NC_040056.1	19308064	19308946	peak_12161	883	-	PR_intron	rna-XM_013100002.3
ORC5	NC_040046.1	189630588	189630798	peak_1218	211	+	utr3	rna-XM_027459368.1
RELN	NC_040046.1	189935532	189940406	peak_1219	4875	+	PR_intron	rna-XM_027459419.1
CHMP1A	NC_040056.1	20611007	20611097	peak_12199	91	-	utr3	rna-XM_027466424.1
CHMP1A	NC_040056.1	20612830	20614088	peak_12200	1259	-	PR_intron	rna-XM_027466424.1
AP4E1	NC_040057.1	3275545	3275606	peak_12270	62	+	utr3	rna-XM_005019473.4
DMXL2	NC_040057.1	4946732	4946882	peak_12284	151	+	cds	rna-XM_027466785.1
TNFAIP8L3	NC_040057.1	5125209	5125359	peak_12285	151	+	cds	rna-XM_027466912.1
FOXL1	NC_040057.1	5470335	5470515	peak_12288	181	+	utr3	rna-XM_027467098.1
CMTM3	NC_040057.1	12008998	12009148	peak_12311	151	+	utr3	rna-XM_027466761.1
LOC113845010	NC_040057.1	17263825	17263973	peak_12348	149	+	cds	rna-XM_027467186.1
RBL2	NC_040057.1	18978460	18978996	peak_12369	537	+	PR_intron	rna-XM_027467016.1
LPCAT2	NC_040057.1	20432695	20432876	peak_12376	182	+	PR_intron	rna-XM_027467063.1
LPCAT2	NC_040057.1	20432934	20433473	peak_12377	540	+	PR_intron	rna-XM_027467063.1
SLC6A2	NC_040057.1	20529305	20529366	peak_12378	62	+	utr3	rna-XM_027467061.1
CHRNA7	NC_040057.1	489294	491862	peak_12389	2569	-	PR_intron	rna-XM_027467126.1
FAM81A	NC_040057.1	569354	569444	peak_12390	91	-	utr5	rna-XM_027467129.1
LOC110351385	NC_040057.1	1880970	1881117	peak_12407	148	-	cds	rna-XM_027466811.1
d815e8ce-02bd-43f0-96be-f399e69bbe15	NC_040057.1	3306077	3306168	peak_12419	92	-	NP_exon	d815e8ce-02bd-43f0-96be-f399e69bbe15.trans
GLDN	NC_040057.1	4988764	4990959	peak_12430	2196	-	PR_intron	rna-XM_005027179.4
CDH8	NC_040057.1	10284372	10284493	peak_12452	122	-	cds	rna-XM_021271466.2
CDH8	NC_040057.1	10431485	10431546	peak_12453	62	-	PR_intron	rna-XM_013098274.3
TK2	NC_040057.1	11976444	11976504	peak_12455	61	-	utr3	rna-XM_027466762.1
TK2	NC_040057.1	11985869	11990835	peak_12456	4967	-	PR_intron	rna-XM_027466762.1
DPY19L3	NC_040057.1	13769377	13769557	peak_12475	181	-	utr3	rna-XM_027466822.1
ZNF536	NC_040057.1	14787689	14787750	peak_12478	62	-	cds	rna-XM_021272922.2
ZNF536	NC_040057.1	14849301	14849512	peak_12479	212	-	cds	rna-XM_021272922.2
IRX3	NC_040057.1	19466581	19466880	peak_12515	300	-	cds	rna-XM_027466990.1
IRX3	NC_040057.1	19467782	19468862	peak_12516	1081	-	cds	rna-XM_027466990.1
IRX3	NC_040057.1	19469339	19469400	peak_12517	62	-	utr5	rna-XM_027466990.1
ESRP2	NC_040057.1	20835920	20838968	peak_12521	3049	-	PR_intron	rna-XM_021276489.2
ESRP2	NC_040057.1	20852759	20852820	peak_12522	62	-	cds	rna-XM_027466919.1
SUCLG2	NC_040058.1	5917816	5918027	peak_12574	212	+	utr3	rna-XM_027467515.1
FAM107A	NC_040058.1	9121553	9122732	peak_12591	1180	+	PR_intron	rna-XM_027468040.1
ACTR8	NC_040058.1	11078210	11078698	peak_12611	489	+	PR_intron	rna-XM_027467615.1
TKT	NC_040058.1	11421310	11421400	peak_12616	91	+	utr3	rna-XM_027467401.1
CARD19	NC_040058.1	11774200	11778798	peak_12625	4599	+	PR_intron	rna-XM_027467629.1
SFMBT2	NC_040046.1	198991313	198992798	peak_1263	1486	+	PR_intron	rna-XM_027460891.1
WNT7A	NC_040058.1	12466348	12466529	peak_12638	182	+	utr5	rna-XM_005016509.2
WNT7A	NC_040058.1	12467863	12498793	peak_12639	30931	+	PR_intron	rna-XM_005016509.2
SFMBT2	NC_040046.1	198996906	198997027	peak_1264	122	+	utr3	rna-XM_027460891.1
WNT7A	NC_040058.1	12499002	12499693	peak_12640	692	+	utr3	rna-XM_005016509.2
WNT7A	NC_040058.1	12502511	12502662	peak_12641	152	+	utr3	rna-XM_005016509.2
TAMM41	NC_040058.1	14213743	14213834	peak_12651	92	+	utr3	rna-XM_027467765.1
PRKCQ	NC_040046.1	199217634	199217794	peak_1266	161	+	PR_intron	rna-XM_027460908.1
POC1A	NC_040058.1	16509370	16509550	peak_12668	181	+	utr3	rna-XM_005030569.4
MKLN1	NC_040046.1	199765027	199765148	peak_1267	122	+	utr3	rna-XM_021276509.2
GNAI2	NC_040058.1	18499713	18499833	peak_12685	121	+	utr3	rna-XM_027467509.1
ABHD6	NC_040058.1	19180470	19180561	peak_12704	92	+	utr3	rna-XM_027467382.1
CHCHD6	NC_040058.1	20088936	20163729	peak_12729	74794	+	PR_intron	rna-XM_027467501.1
LOC101797129	NC_040058.1	21801274	21801334	peak_12749	61	+	utr5	rna-XM_013105508.3
UCN3	NC_040046.1	201449046	201449107	peak_1275	62	+	cds	rna-XM_005014551.4
LOC113845030	NC_040058.1	21969466	21969734	peak_12759	269	+	cds	rna-XM_027467404.1
TRH	NC_040058.1	204194	205121	peak_12761	928	-	PR_intron	rna-XM_021267191.2
EDEM1	NC_040058.1	1584412	1584532	peak_12774	121	-	cds	rna-XM_005019910.4
CNTN4	NC_040058.1	2178168	2178558	peak_12789	391	-	utr3	rna-XM_027467393.1
SLC25A26	NC_040058.1	6247605	6247696	peak_12802	92	-	NP_exon	rna-XR_003500362.1
P4HTM	NC_040058.1	9329661	9329722	peak_12819	62	-	PR_intron	rna-XM_027468048.1
CACNA1D	NC_040058.1	11308422	11308543	peak_12826	122	-	utr5	rna-XM_027467333.1
LOC113845102	NC_040058.1	14126162	14126222	peak_12839	61	-	cds	rna-XM_027467930.1
IARS	NC_040058.1	15368593	15378305	peak_12847	9713	-	PR_intron	rna-XM_027467325.1
SHISA5	NC_040058.1	15689000	15689150	peak_12859	151	-	cds	rna-XM_027467511.1
COPG2	NC_040046.1	201675557	201675737	peak_1287	181	+	utr3	rna-XM_027461506.1
LOC113844129	NC_040046.1	201689732	201689913	peak_1288	182	+	utr3	rna-XM_027461521.1
LOC113844129	NC_040046.1	201689719	201689898	peak_1289	180	+	utr3	rna-XM_027461521.1
LOC113845023	NC_040058.1	17728901	17729082	peak_12906	182	-	utr3	rna-XM_027467340.1
C13H3orf18	NC_040058.1	18048537	18051027	peak_12908	2491	-	PR_intron	rna-XM_027467665.1
C13H3orf18	NC_040058.1	18054334	18054454	peak_12909	121	-	cds	rna-XM_027467665.1
PCBP4	NC_040058.1	18561464	18562146	peak_12916	683	-	PR_intron	rna-XM_027467920.1
ALAS1	NC_040058.1	18786906	18787933	peak_12918	1028	-	PR_intron	rna-XM_005026493.3
LOC101805470	NC_040059.1	1156031	1156302	peak_12977	272	+	cds	rna-XM_027468399.1
LOC101805470	NC_040059.1	1157685	1158347	peak_12978	663	+	PR_intron	rna-XM_027468399.1
SPOCK1	NC_040059.1	6102004	6103357	peak_13057	1354	+	PR_intron	rna-XM_005018686.4
LOC101804862	NC_040059.1	7913774	7913864	peak_13087	91	+	utr3	rna-XM_027468221.1
SGCD	NC_040059.1	9394140	9394201	peak_13108	62	+	PR_intron	rna-XM_027468552.1
THG1L	NC_040059.1	9759224	9759284	peak_13110	61	+	cds	rna-XM_027468602.1
SLC34A1	NC_040059.1	11006289	11006470	peak_13138	182	+	utr5	rna-XM_027468519.1
DRD1	NC_040059.1	11047404	11047494	peak_13141	91	+	cds	rna-XM_027468062.1
NRG2	NC_040059.1	13063013	13063433	peak_13155	421	+	cds	rna-XM_027468091.1
SLC35A4	NC_040059.1	13407348	13407556	peak_13156	209	+	cds	rna-XM_005009969.3
LOC101793761	NC_040046.1	202438765	202438825	peak_1316	61	+	utr5	rna-XM_027462059.1
LOC106019744	NC_040059.1	13695936	13696175	peak_13164	240	+	NP_exon	gene-LOC106019744.trans
LOC106019744	NC_040059.1	13696562	13696623	peak_13165	62	+	NP_exon	gene-LOC106019744.trans
LOC106019744	NC_040059.1	13697695	13697786	peak_13166	92	+	NP_exon	gene-LOC106019744.trans
LOC101798101	NC_040059.1	13704319	13704409	peak_13167	91	+	NP_exon	gene-LOC101798101.trans
LOC113845202	NC_040059.1	13709807	13709897	peak_13168	91	+	NP_exon	gene-LOC113845202.trans
LOC106014285	NC_040059.1	13716476	13716567	peak_13169	92	+	NP_exon	gene-LOC106014285.trans
DELE1	NC_040059.1	14447251	14447710	peak_13205	460	+	PR_intron	rna-XM_027468329.1
RNF14	NC_040059.1	3244771	3244922	peak_13249	152	-	cds	rna-XM_027468102.1
SOWAHA	NC_040059.1	3385788	3385909	peak_13254	122	-	cds	rna-XM_005024357.3
SOWAHA	NC_040059.1	3385489	3385550	peak_13255	62	-	cds	rna-XM_005024357.3
SOWAHA	NC_040059.1	3385789	3385909	peak_13256	121	-	cds	rna-XM_005024357.3
PDLIM4	NC_040059.1	3617297	3617417	peak_13260	121	-	utr3	rna-XM_027468660.1
KLHL3	NC_040059.1	6168080	6168170	peak_13270	91	-	utr3	rna-XM_027468402.1
PGM2L1	NC_040046.1	1014541	1014632	peak_1330	92	-	cds	rna-XM_027466145.1
FAT2	NC_040059.1	7914859	7914979	peak_13317	121	-	utr3	rna-XM_027468224.1
FAT2	NC_040059.1	7915450	7915747	peak_13318	298	-	cds	rna-XM_027468224.1
FAT2	NC_040059.1	7914833	7914983	peak_13319	151	-	utr3	rna-XM_027468224.1
FAT2	NC_040059.1	7915461	7915702	peak_13320	242	-	cds	rna-XM_027468224.1
FAT2	NC_040059.1	7924300	7924480	peak_13321	181	-	cds	rna-XM_027468224.1
FAT2	NC_040059.1	7939128	7939219	peak_13323	92	-	cds	rna-XM_027468224.1
FAT2	NC_040059.1	7954997	7955237	peak_13324	241	-	cds	rna-XM_027468224.1
FAT2	NC_040059.1	7957693	7957934	peak_13325	242	-	cds	rna-XM_027468224.1
LOC101798784	NC_040059.1	13415679	13415740	peak_13389	62	-	cds	rna-XM_005009992.4
LOC113845144	NC_040059.1	13455254	13455344	peak_13390	91	-	cds	rna-XM_027468325.1
SMIM33	NC_040059.1	14468223	14468284	peak_13400	62	-	utr5	rna-XM_027468657.1
P2RY2	NC_040046.1	1556952	1557013	peak_1343	62	-	cds	rna-XM_005022592.4
HS3ST2	NC_040060.1	703301	703421	peak_13432	121	+	cds	rna-XM_027469157.1
HAGH	NC_040060.1	1857751	1857932	peak_13462	182	+	PR_intron	rna-XM_027468982.1
CHTF18	NC_040060.1	1922343	1922822	peak_13463	480	+	PR_intron	rna-XM_027469036.1
CHTF18	NC_040060.1	1924494	1924674	peak_13464	181	+	cds	rna-XM_027469036.1
GRAP	NC_040060.1	2838842	2839020	peak_13475	179	+	utr3	rna-XM_027469271.1
FAM83G	NC_040060.1	2862938	2862998	peak_13476	61	+	utr3	rna-XM_005011587.4
71a3d6c2-e1d1-44a7-b3cb-cb51ed11dd06	NC_040060.1	3001694	3001813	peak_13482	120	+	NP_exon	71a3d6c2-e1d1-44a7-b3cb-cb51ed11dd06.trans
71a3d6c2-e1d1-44a7-b3cb-cb51ed11dd06	NC_040060.1	3001632	3001810	peak_13483	179	+	NP_exon	71a3d6c2-e1d1-44a7-b3cb-cb51ed11dd06.trans
TNFRSF13B	NC_040060.1	3360349	3360589	peak_13494	241	+	utr3	rna-XM_027469150.1
942369e8-1dd2-4321-9c0e-f5e2f3b9c384	NC_040060.1	4745524	4745704	peak_13524	181	+	NP_exon	942369e8-1dd2-4321-9c0e-f5e2f3b9c384.trans
942369e8-1dd2-4321-9c0e-f5e2f3b9c384	NC_040060.1	4745517	4745695	peak_13525	179	+	NP_exon	942369e8-1dd2-4321-9c0e-f5e2f3b9c384.trans
PSMG3	NC_040060.1	5664568	5664688	peak_13538	121	+	utr3	rna-XM_027469253.1
19ad855a-8f88-487f-8622-ec5e848c7868	NC_040060.1	5698971	5699122	peak_13540	152	+	NP_exon	19ad855a-8f88-487f-8622-ec5e848c7868.trans
19ad855a-8f88-487f-8622-ec5e848c7868	NC_040060.1	5698942	5699122	peak_13541	181	+	NP_exon	19ad855a-8f88-487f-8622-ec5e848c7868.trans
CRYM	NC_040060.1	8117797	8117947	peak_13564	151	+	utr5	rna-XM_027469563.1
GPR139	NC_040060.1	8489123	8489214	peak_13571	92	+	utr3	rna-XM_027468817.1
TMC7	NC_040060.1	8736613	8739525	peak_13577	2913	+	NP_intron	rna-XR_003500632.1
LOC101800169	NC_040060.1	10470165	10488691	peak_13599	18527	+	NP_intron	rna-XR_003500759.1
LOC101800169	NC_040060.1	10488899	10488960	peak_13600	62	+	NP_intron	rna-XR_003500759.1
RGS11	NC_040060.1	11287007	11287098	peak_13612	92	+	utr3	rna-XM_027469336.1
C15H7orf26	NC_040060.1	11398946	11399246	peak_13613	301	+	cds	rna-XM_027468749.1
GUCY2F	NC_040046.1	2630085	2642167	peak_1363	12083	-	PR_intron	rna-XM_027464946.1
2f0f521b-4d6f-42c1-a2d7-19aa8e068b80	NC_040060.1	12273301	12273450	peak_13630	150	+	NP_exon	2f0f521b-4d6f-42c1-a2d7-19aa8e068b80.trans
2f0f521b-4d6f-42c1-a2d7-19aa8e068b80	NC_040060.1	12273209	12273449	peak_13631	241	+	NP_exon	2f0f521b-4d6f-42c1-a2d7-19aa8e068b80.trans
e0a6d6ad-c776-4ad3-84af-c6d8ed4268cc	NC_040060.1	12275106	12275255	peak_13632	150	+	NP_exon	e0a6d6ad-c776-4ad3-84af-c6d8ed4268cc.trans
e0a6d6ad-c776-4ad3-84af-c6d8ed4268cc	NC_040060.1	12275107	12275255	peak_13633	149	+	NP_exon	e0a6d6ad-c776-4ad3-84af-c6d8ed4268cc.trans
LOC106020158	NC_040060.1	12275634	12275843	peak_13634	210	+	utr5	rna-XM_027469406.1
LOC106020158	NC_040060.1	12277122	12278347	peak_13635	1226	+	PR_intron	rna-XM_027469406.1
LOC106020158	NC_040060.1	12282440	12282590	peak_13636	151	+	utr3	rna-XM_027469405.1
PAK1	NC_040046.1	3043539	3043600	peak_1364	62	-	utr3	rna-XM_027466598.1
METTL26	NC_040060.1	12947220	12947458	peak_13647	239	+	utr3	rna-XM_027468958.1
PAK1	NC_040046.1	3043928	3044409	peak_1365	482	-	utr3	rna-XM_027466598.1
PAK1	NC_040046.1	3061555	3061616	peak_1366	62	-	cds	rna-XM_027466598.1
df7fbb75-36a7-4078-93d2-c6f38f2cbe82	NC_040060.1	13379178	13379299	peak_13660	122	+	NP_exon	df7fbb75-36a7-4078-93d2-c6f38f2cbe82.trans
df7fbb75-36a7-4078-93d2-c6f38f2cbe82	NC_040060.1	13379179	13379299	peak_13661	121	+	NP_exon	df7fbb75-36a7-4078-93d2-c6f38f2cbe82.trans
LOC101800187	NC_040060.1	13415026	13415207	peak_13666	182	+	cds	rna-XM_027469135.1
PAK1	NC_040046.1	3078455	3078546	peak_1367	92	-	PR_intron	rna-XM_027466598.1
PAK1	NC_040046.1	3101475	3108844	peak_1368	7370	-	PR_intron	rna-XM_027466598.1
HS3ST4	NC_040060.1	550631	550812	peak_13700	182	-	NP_exon	rna-XR_003500694.1
EARS2	NC_040060.1	844961	845594	peak_13705	634	-	PR_intron	rna-XM_027468738.1
CACNG3	NC_040060.1	1069196	1069257	peak_13716	62	-	utr3	rna-XM_027469069.1
TEX47	NC_040060.1	1292655	1292716	peak_13718	62	-	NP_exon	rna-XR_003500609.1
MLST8	NC_040060.1	1374979	1375277	peak_13721	299	-	utr3	rna-XM_027468860.1
C1QTNF8	NC_040060.1	2377735	2377974	peak_13743	240	-	utr5	rna-XM_027469331.1
FAM83G	NC_040060.1	2862923	2862984	peak_13748	62	-	utr3	rna-XM_005011587.4
PRPSAP2	NC_040060.1	2886695	2887887	peak_13749	1193	-	PR_intron	rna-XM_027469263.1
BUD31	NC_040060.1	3661300	3661507	peak_13794	208	-	utr3	rna-XM_027468826.1
FSCN1	NC_040060.1	3884295	3884476	peak_13795	182	-	cds	rna-XM_027469169.1
LOC113844712	NC_040046.1	15378468	15378558	peak_138	91	+	NP_exon	gene-LOC113844712.trans
AMZ1	NC_040060.1	4811907	4812028	peak_13805	122	-	cds	rna-XM_027469577.1
AMZ1	NC_040060.1	4827215	4827336	peak_13806	122	-	cds	rna-XM_027469577.1
SYTL2	NC_040046.1	5662831	5662891	peak_1381	61	-	cds	rna-XM_027466909.1
LOC101804267	NC_040060.1	6088133	6089753	peak_13826	1621	-	PR_intron	rna-XM_005020144.4
LOC101789961	NC_040060.1	6615248	6615428	peak_13828	181	-	cds	rna-XM_021272823.2
CCDC78	NC_040060.1	12397064	12399251	peak_13931	2188	-	PR_intron	rna-XM_027469388.1
LOC101801165	NC_040060.1	13214450	13214660	peak_13948	211	-	utr3	rna-XM_021276597.2
LOC113845254	NC_040060.1	13431494	13431615	peak_13954	122	-	utr5	rna-XM_027469137.1
GRIN2A	NC_040060.1	16611089	16611179	peak_13965	91	-	cds	rna-XM_027469042.1
GRIN2A	NC_040060.1	16611388	16611598	peak_13966	211	-	cds	rna-XM_027469042.1
GPR83	NC_040046.1	10482375	10482585	peak_1397	211	-	cds	rna-XM_005012839.4
LOC113845228	NC_040060.1	17603626	17603747	peak_13973	122	-	utr5	rna-XM_027468873.1
GLT1D1	NC_040061.1	1065804	1074740	peak_13986	8937	+	PR_intron	rna-XM_027469877.1
GLT1D1	NC_040061.1	1127709	1127770	peak_13987	62	+	utr3	rna-XM_027469877.1
PIWIL1	NC_040061.1	1588783	1588874	peak_13992	92	+	utr5	rna-XM_027470137.1
MMP17	NC_040061.1	2417689	2419357	peak_14000	1669	+	PR_intron	rna-XM_027469983.1
LOC101804932	NC_040061.1	2554343	2554464	peak_14007	122	+	cds	rna-XM_027470288.1
SLC25A1	NC_040061.1	5734783	5739703	peak_14057	4921	+	PR_intron	rna-XM_027469931.1
C16H22orf15	NC_040061.1	5878027	5878267	peak_14058	241	+	utr3	rna-XM_027470011.1
MMP11	NC_040061.1	5888569	5888659	peak_14059	91	+	cds	rna-XM_027470201.1
SMARCB1	NC_040061.1	5917451	5917720	peak_14060	270	+	utr3	rna-XM_021275125.2
LOC101797125	NC_040061.1	6020890	6020981	peak_14065	92	+	utr3	rna-XM_005023530.4
LOC101798203	NC_040061.1	6187108	6187408	peak_14069	301	+	utr3	rna-XM_027470081.1
GGT1	NC_040061.1	6379643	6379823	peak_14072	181	+	PR_intron	rna-XM_027470075.1
GGT1	NC_040061.1	6397696	6398057	peak_14073	362	+	PR_intron	rna-XM_027470076.1
PRR14L	NC_040061.1	6935123	6935483	peak_14076	361	+	cds	rna-XM_027469695.1
CCDC82	NC_040046.1	11214723	11214963	peak_1409	241	-	cds	rna-XM_005012853.4
VSIG10	NC_040061.1	8048008	8048225	peak_14116	218	+	PR_intron	rna-XM_027470101.1
LOC101805413	NC_040061.1	9923009	9923567	peak_14135	559	+	cds	rna-XM_027469882.1
SLC7A4	NC_040061.1	10765584	10765765	peak_14143	182	+	cds	rna-NM_001310800.1
PLA2G3	NC_040061.1	10883149	10883240	peak_14146	92	+	utr3	rna-XM_027470223.1
LOC113845354	NC_040061.1	10956051	10956172	peak_14148	122	+	cds	rna-XM_027470183.1
RIMBP2	NC_040061.1	1633035	1633156	peak_14211	122	-	PR_intron	rna-XM_021271362.2
RIMBP2	NC_040061.1	1633335	1633486	peak_14212	152	-	PR_intron	rna-XM_021271362.2
RIMBP2	NC_040061.1	1639691	1639872	peak_14213	182	-	cds	rna-XM_021271362.2
RIMBP2	NC_040061.1	1643971	1644062	peak_14214	92	-	cds	rna-XM_021271362.2
473a2f7e-3daf-4997-9270-032c22961bdd	NC_040061.1	2746293	2746413	peak_14217	121	-	NP_exon	473a2f7e-3daf-4997-9270-032c22961bdd.trans
473a2f7e-3daf-4997-9270-032c22961bdd	NC_040061.1	2746345	2746406	peak_14218	62	-	NP_exon	473a2f7e-3daf-4997-9270-032c22961bdd.trans
GSC2	NC_040061.1	5846463	5846644	peak_14249	182	-	cds	rna-XM_027470256.1
KDELC2	NC_040046.1	16345011	16345191	peak_1429	181	-	cds	rna-XM_027468517.1
SIRT4	NC_040061.1	7463236	7463296	peak_14301	61	-	cds	rna-XM_005026647.4
SRRM4	NC_040061.1	7861385	7868828	peak_14306	7444	-	PR_intron	rna-XM_027469891.1
C16H12orf49	NC_040061.1	9311887	9312096	peak_14329	210	-	utr3	rna-XM_027469639.1
NOS1	NC_040061.1	9487579	9487759	peak_14335	181	-	cds	rna-XM_027469789.1
ASCC2	NC_040061.1	9721725	9721816	peak_14345	92	-	utr5	rna-XM_027470041.1
LIF	NC_040061.1	9874938	9875058	peak_14346	121	-	cds	rna-XM_027470145.1
RTN4R	NC_040061.1	10399858	10399949	peak_14355	92	-	utr3	rna-XM_027469987.1
RTN4R	NC_040061.1	10400217	10400486	peak_14356	270	-	cds	rna-XM_027469987.1
RTN4R	NC_040061.1	10401262	10401352	peak_14357	91	-	cds	rna-XM_027469987.1
ANAPC5	NC_040061.1	12128625	12130498	peak_14392	1874	-	PR_intron	rna-XM_005028187.3
HPD	NC_040061.1	12375181	12375509	peak_14398	329	-	PR_intron	rna-XM_027469662.1
LOC101793739	NC_040062.1	340844	340994	peak_14417	151	+	PR_intron	rna-XM_027470483.1
LOC106020611	NC_040062.1	441435	441556	peak_14418	122	+	cds	rna-XM_027470399.1
LOC113845387	NC_040062.1	564057	564208	peak_14423	152	+	cds	rna-XM_027470375.1
LOC113845387	NC_040062.1	565376	565961	peak_14424	586	+	PR_intron	rna-XM_027470375.1
LOC113845398	NC_040062.1	804196	804584	peak_14427	389	+	cds	rna-XM_027470519.1
LOC113845398	NC_040062.1	805238	805417	peak_14428	180	+	utr3	rna-XM_027470519.1
LOC101789992	NC_040062.1	818507	818686	peak_14429	180	+	utr5	rna-XM_027470500.1
LOC101805457	NC_040062.1	902152	902242	peak_14430	91	+	cds	rna-XM_005018305.4
LOC101797522	NC_040046.1	17736697	17736788	peak_1444	92	-	utr3	rna-XM_027468877.1
LOC101797703	NC_040046.1	17757941	17758242	peak_1445	302	-	cds	rna-XM_027468899.1
LOC101803756	NC_040063.1	51059	51180	peak_14459	122	+	NP_intron	rna-XR_003501014.1
EEF1AKMT1	NC_040046.1	17938683	17940485	peak_1446	1803	-	PR_intron	rna-XM_005028728.4
LOC101803756	NC_040063.1	51060	51180	peak_14460	121	+	NP_intron	rna-XR_003501014.1
XPO4	NC_040046.1	18010231	18031492	peak_1447	21262	-	PR_intron	rna-XM_027469007.1
LOC101789713	NC_040063.1	968351	968441	peak_14471	91	+	cds	rna-XM_027471035.1
LOC101789713	NC_040063.1	968826	968946	peak_14472	121	+	utr3	rna-XM_027471035.1
LOC101789713	NC_040063.1	969034	969183	peak_14473	150	+	utr3	rna-XM_027471035.1
HDHD3	NC_040063.1	1523766	1523825	peak_14476	60	+	utr3	rna-XM_027470809.1
517f5271-3c7e-4725-807f-29d96e2052dd	NC_040063.1	1891821	1891972	peak_14489	152	+	NP_exon	517f5271-3c7e-4725-807f-29d96e2052dd.trans
517f5271-3c7e-4725-807f-29d96e2052dd	NC_040063.1	1891829	1891978	peak_14490	150	+	NP_exon	517f5271-3c7e-4725-807f-29d96e2052dd.trans
LOC101794703	NC_040063.1	2082443	2082562	peak_14500	120	+	utr3	rna-XM_027470885.1
LOC101794161	NC_040063.1	2468604	2468665	peak_14509	62	+	cds	rna-XM_027470678.1
TMEM268	NC_040063.1	2713212	2713451	peak_14515	240	+	utr3	rna-XM_021274361.2
LOC113845476	NC_040063.1	5966539	5966720	peak_14540	182	+	cds	rna-XM_027471074.1
SARDH	NC_040063.1	6281157	6281308	peak_14552	152	+	utr3	rna-XM_027471050.1
ZDHHC12	NC_040063.1	8238081	8238231	peak_14608	151	+	utr3	rna-XM_005022682.4
AGPAT2	NC_040063.1	8554462	8554582	peak_14613	121	+	utr3	rna-XM_027471122.1
LMX1B	NC_040063.1	11368782	11368873	peak_14673	92	+	utr3	rna-XM_027470847.1
LOC101797371	NC_040063.1	11676720	11676841	peak_14676	122	+	cds	rna-XM_027470984.1
LOC101797371	NC_040063.1	11676728	11676848	peak_14677	121	+	cds	rna-XM_027470984.1
LOC101803756	NC_040063.1	56237	57965	peak_14678	1729	-	NP_intron	rna-XR_003501014.1
PHPT1	NC_040063.1	461845	462053	peak_14687	209	-	utr3	rna-XM_027471075.1
MTIF3	NC_040046.1	20501973	20502180	peak_1473	208	-	cds	rna-XM_005026008.4
MTIF3	NC_040046.1	20503187	20506521	peak_1474	3335	-	PR_intron	rna-XM_005026008.4
ST6GALNAC4	NC_040063.1	5242324	5242532	peak_14748	209	-	utr3	rna-XM_027470828.1
NTNG2	NC_040063.1	6954528	6954649	peak_14787	122	-	cds	rna-XM_027470606.1
POMT1	NC_040063.1	7209853	7210501	peak_14788	649	-	PR_intron	rna-XM_005013244.4
SLC7A1	NC_040046.1	21316173	21316353	peak_1480	181	-	utr3	rna-XM_027466575.1
LAMC3	NC_040063.1	7383675	7384258	peak_14803	584	-	cds	rna-XM_027471117.1
LAMC3	NC_040063.1	7385160	7385453	peak_14804	294	-	PR_intron	rna-XM_027471117.1
SLC7A1	NC_040046.1	21317398	21318306	peak_1481	909	-	PR_intron	rna-NM_001310833.1
SLC7A1	NC_040046.1	21337857	21343618	peak_1482	5762	-	PR_intron	rna-XM_027464857.1
PRRX2	NC_040063.1	7867797	7868126	peak_14822	330	-	utr3	rna-XM_027471195.1
PRRX2	NC_040063.1	7868394	7869790	peak_14823	1397	-	utr3	rna-XM_027471195.1
PRRX2	NC_040063.1	7870191	7886240	peak_14824	16050	-	PR_intron	rna-XM_027471195.1
RAB14	NC_040063.1	9366796	9366976	peak_14866	181	-	utr5	rna-XM_027471189.1
STOM	NC_040063.1	9410437	9415632	peak_14867	5196	-	PR_intron	rna-XM_027470783.1
NDUFA8	NC_040063.1	9698796	9698857	peak_14869	62	-	cds	rna-XM_005029536.4
LHX6	NC_040063.1	9716136	9716197	peak_14870	62	-	utr3	rna-XM_027470695.1
ANGPTL2	NC_040063.1	11583464	11584184	peak_14898	721	-	cds	rna-XM_005023985.3
FBXW2	NC_040063.1	11682575	11682724	peak_14899	150	-	cds	rna-XM_005023991.3
FBXW2	NC_040063.1	11689941	11690001	peak_14900	61	-	cds	rna-XM_005023991.3
ba9e07c3-9e07-4f40-8c3b-249311563b71	NC_040064.1	1099335	1099456	peak_14931	122	+	NP_exon	ba9e07c3-9e07-4f40-8c3b-249311563b71.trans
ba9e07c3-9e07-4f40-8c3b-249311563b71	NC_040064.1	1099292	1099469	peak_14932	178	+	NP_exon	ba9e07c3-9e07-4f40-8c3b-249311563b71.trans
FOXJ1	NC_040064.1	3316679	3316769	peak_14972	91	+	cds	rna-XM_027471497.1
FOXJ1	NC_040064.1	3319805	3319955	peak_14973	151	+	cds	rna-XM_027471497.1
STXBP4	NC_040064.1	7977051	7977141	peak_15050	91	+	cds	rna-XM_027471455.1
NOG	NC_040064.1	8392298	8392418	peak_15053	121	+	cds	rna-XM_005012255.3
GCGR	NC_040064.1	184640	184850	peak_15092	211	-	utr3	rna-XM_027471594.1
TMC6	NC_040064.1	221662	221843	peak_15094	182	-	utr3	rna-XM_027471600.1
cf67d02f-9fdb-4d82-b39b-61991c5d8f4a	NC_040064.1	275125	275659	peak_15095	535	-	NP_exon	cf67d02f-9fdb-4d82-b39b-61991c5d8f4a.trans
cf67d02f-9fdb-4d82-b39b-61991c5d8f4a	NC_040064.1	275124	275657	peak_15096	534	-	NP_exon	cf67d02f-9fdb-4d82-b39b-61991c5d8f4a.trans
FDX1	NC_040046.1	17092645	17097153	peak_151	4509	+	PR_intron	rna-XM_027468626.1
CCDC57	NC_040064.1	566942	567004	peak_15111	63	-	cds	rna-XM_027471684.1
UTP6	NC_040064.1	1022633	1023613	peak_15118	981	-	PR_intron	rna-XM_027471414.1
CRLF3	NC_040064.1	1078485	1082450	peak_15119	3966	-	PR_intron	rna-XM_027471416.1
TRPC4	NC_040046.1	24936126	24936485	peak_1514	360	-	cds	rna-XM_005018338.4
MFSD11	NC_040064.1	3005515	3005576	peak_15140	62	-	utr3	rna-XM_027471430.1
MFSD11	NC_040064.1	3005500	3005591	peak_15141	92	-	utr3	rna-XM_027471430.1
METTL23	NC_040064.1	3028685	3028745	peak_15142	61	-	PR_intron	rna-XM_027471432.1
CDK3	NC_040064.1	3409679	3409799	peak_15146	121	-	utr3	rna-XM_005010169.4
TRPC4	NC_040046.1	25097477	25097777	peak_1515	301	-	utr5	rna-XM_005018338.4
ITGB4	NC_040064.1	3575161	3575372	peak_15150	212	-	utr3	rna-XM_027471297.1
LOC113845533	NC_040064.1	4521860	4522100	peak_15176	241	-	utr3	rna-XM_027471422.1
4eb8964c-c8c3-47c9-929b-61a7686374e8	NC_040064.1	4522966	4523206	peak_15177	241	-	NP_exon	4eb8964c-c8c3-47c9-929b-61a7686374e8.trans
LOC113845533	NC_040064.1	4521865	4522076	peak_15178	212	-	utr3	rna-XM_027471422.1
4eb8964c-c8c3-47c9-929b-61a7686374e8	NC_040064.1	4522974	4523214	peak_15179	241	-	NP_exon	4eb8964c-c8c3-47c9-929b-61a7686374e8.trans
PIRT	NC_040064.1	5752117	5752536	peak_15183	420	-	utr3	rna-XM_005030652.4
PIRT	NC_040064.1	5753373	5753433	peak_15184	61	-	utr3	rna-XM_005030652.4
PIRT	NC_040064.1	5754359	5754420	peak_15185	62	-	utr3	rna-XM_005030652.4
LOC101790138	NC_040064.1	7942777	7942898	peak_15191	122	-	utr3	rna-XM_027471459.1
ACSF2	NC_040064.1	8987425	8987876	peak_15212	452	-	PR_intron	rna-XM_027471342.1
ACSBG2	NC_040065.1	143703	144167	peak_15242	465	+	PR_intron	rna-XM_005029195.4
BTBD2	NC_040065.1	734306	734427	peak_15260	122	+	utr3	rna-XM_027472055.1
LOC101803079	NC_040065.1	1153809	1155757	peak_15279	1949	+	PR_intron	rna-XM_027472321.1
TJP3	NC_040065.1	1325189	1325713	peak_15283	525	+	PR_intron	rna-XM_027472323.1
PIAS4	NC_040065.1	2336894	2340047	peak_15304	3154	+	PR_intron	rna-XM_027472083.1
LOC113845643	NC_040065.1	3573674	3574089	peak_15349	416	+	utr3	rna-XM_027472328.1
ARL11	NC_040046.1	27607536	27607627	peak_1540	92	-	utr3	rna-XM_021269343.2
ARL11	NC_040046.1	27609144	27609204	peak_1541	61	-	cds	rna-XM_021269343.2
CENPV	NC_040065.1	9391227	9391374	peak_15485	148	+	cds	rna-XM_027472631.1
TLCD1	NC_040065.1	10314077	10314166	peak_15534	90	+	utr3	rna-XM_027472274.1
ALDOC	NC_040065.1	10396649	10396829	peak_15543	181	+	utr3	rna-XM_027472465.1
DNAJC15	NC_040046.1	30088238	30097828	peak_1557	9591	-	PR_intron	rna-XM_027472244.1
LOC101804602	NC_040065.1	11347475	11349728	peak_15581	2254	+	PR_intron	rna-XM_027472269.1
LOC113845669	NC_040065.1	1224008	1224882	peak_15623	875	-	PR_intron	rna-XM_027472485.1
2d865ffa-d08f-42de-a1f1-dfbbac975eb4	NC_040046.1	30428917	30429157	peak_1563	241	-	NP_exon	2d865ffa-d08f-42de-a1f1-dfbbac975eb4.trans
LOC101804439	NC_040065.1	1640213	1640303	peak_15640	91	-	cds	rna-XM_027472649.1
LOC101792538	NC_040065.1	2578486	2578695	peak_15667	210	-	cds	rna-XM_013107030.3
LOC101792538	NC_040065.1	2580367	2580607	peak_15668	241	-	cds	rna-XM_013107030.3
CNMD	NC_040046.1	31072407	31072558	peak_1569	152	-	utr3	rna-XM_027472462.1
CRLF1	NC_040065.1	3779297	3779418	peak_15690	122	-	PR_intron	rna-XM_027472412.1
LOC101803147	NC_040065.1	3944350	3944530	peak_15692	181	-	cds	rna-XM_005029827.4
MRPL34	NC_040065.1	4344632	4344720	peak_15710	89	-	utr3	rna-XM_027472442.1
PCDH20	NC_040046.1	35096556	35096736	peak_1572	181	-	cds	rna-XM_027472707.1
KLHL1	NC_040046.1	39365366	39365427	peak_1573	62	-	utr3	rna-XM_027472827.1
KLHL1	NC_040046.1	39611039	39611250	peak_1574	212	-	cds	rna-XM_027472827.1
FGF22	NC_040065.1	5027833	5027894	peak_15740	62	-	utr3	rna-XM_027472344.1
HCN2	NC_040065.1	5049907	5050086	peak_15741	180	-	cds	rna-XM_027472345.1
SGSM2	NC_040065.1	6105077	6105198	peak_15758	122	-	cds	rna-XM_027471958.1
SGSM2	NC_040065.1	6105705	6107741	peak_15759	2037	-	PR_intron	rna-XM_027471958.1
SGSM2	NC_040065.1	6123304	6123365	peak_15760	62	-	cds	rna-XM_027471958.1
WSB1	NC_040065.1	6384940	6385030	peak_15766	91	-	utr3	rna-XM_027472153.1
WSB1	NC_040065.1	6384941	6385002	peak_15767	62	-	utr3	rna-XM_027472153.1
ZNHIT3	NC_040065.1	7527243	7527361	peak_15792	119	-	cds	rna-XM_027471754.1
RPH3AL	NC_040065.1	8839769	8839860	peak_15828	92	-	utr3	rna-XM_027472506.1
bb7c1fdf-487b-4a1d-95ad-a90fb13f3a0d	NC_040065.1	8962271	8962512	peak_15832	242	-	NP_exon	bb7c1fdf-487b-4a1d-95ad-a90fb13f3a0d.trans
bb7c1fdf-487b-4a1d-95ad-a90fb13f3a0d	NC_040065.1	8962660	8963050	peak_15833	391	-	NP_exon	bb7c1fdf-487b-4a1d-95ad-a90fb13f3a0d.trans
bb7c1fdf-487b-4a1d-95ad-a90fb13f3a0d	NC_040065.1	8962272	8962512	peak_15834	241	-	NP_exon	bb7c1fdf-487b-4a1d-95ad-a90fb13f3a0d.trans
bb7c1fdf-487b-4a1d-95ad-a90fb13f3a0d	NC_040065.1	8962661	8963051	peak_15835	391	-	NP_exon	bb7c1fdf-487b-4a1d-95ad-a90fb13f3a0d.trans
LOC113839590	NC_040065.1	9072782	9072873	peak_15843	92	-	cds	rna-XM_005023083.2
CENPV	NC_040065.1	9392770	9392951	peak_15856	182	-	PR_intron	rna-XM_027472631.1
KIF12	NC_040065.1	10522553	10522674	peak_15887	122	-	utr3	rna-XM_027471902.1
TMEM248	NC_040065.1	11195181	11195242	peak_15903	62	-	utr3	rna-XM_027472185.1
LOC110354301	NC_040065.1	11499082	11499200	peak_15916	119	-	utr3	rna-XM_027472190.1
RFFL	NC_040065.1	11819175	11819295	peak_15917	121	-	utr3	rna-XM_005010651.4
PEX12	NC_040065.1	11883800	11883979	peak_15920	180	-	utr3	rna-XM_027472691.1
STYXL1	NC_040065.1	12067222	12067342	peak_15927	121	-	cds	rna-XM_027472701.1
OCSTAMP	NC_040066.1	1700823	1701031	peak_15965	209	+	cds	rna-XM_027442867.1
GDAP1L1	NC_040066.1	1782650	1782740	peak_15967	91	+	cds	rna-XM_005016360.4
GDAP1L1	NC_040066.1	1783603	1783693	peak_15968	91	+	utr3	rna-XM_005016360.4
SNTA1	NC_040066.1	2934006	2934096	peak_15979	91	+	utr3	rna-XM_027473194.1
c54b5d50-40a6-4554-9f63-6e9f0c4adb82	NC_040046.1	43750094	43750242	peak_1599	149	-	NP_exon	c54b5d50-40a6-4554-9f63-6e9f0c4adb82.trans
DBNDD2	NC_040066.1	4558574	4559145	peak_15992	572	+	utr3	rna-XM_027473105.1
c54b5d50-40a6-4554-9f63-6e9f0c4adb82	NC_040046.1	43750107	43750257	peak_1600	151	-	NP_exon	c54b5d50-40a6-4554-9f63-6e9f0c4adb82.trans
CEBPB	NC_040066.1	7394099	7394250	peak_16043	152	+	cds	rna-XM_027473152.1
TFAP2C	NC_040066.1	9688706	9689065	peak_16060	360	+	cds	rna-XM_027442876.1
RAE1	NC_040066.1	10035259	10035469	peak_16061	211	+	utr3	rna-XM_027473131.1
STX16	NC_040066.1	10728626	10729245	peak_16066	620	+	PR_intron	rna-XM_027472958.1
TUBB1	NC_040066.1	10963156	10963277	peak_16073	122	+	cds	rna-XM_005010394.4
TUBB1	NC_040066.1	10963755	10963876	peak_16074	122	+	utr3	rna-XM_005010394.4
EDN3	NC_040066.1	11063393	11065528	peak_16075	2136	+	PR_intron	rna-XM_027473221.1
FAM217B	NC_040066.1	11281068	11281158	peak_16078	91	+	cds	rna-XM_027442923.1
SS18L1	NC_040066.1	12291071	12292267	peak_16082	1197	+	PR_intron	rna-XM_027472855.1
COL9A3	NC_040066.1	12998792	12998882	peak_16097	91	+	cds	rna-XM_027473081.1
LOC113845734	NC_040066.1	14287605	14287755	peak_16117	151	+	cds	rna-XM_027472935.1
a97bce15-4343-4685-86f6-8207242b32d0	NC_040066.1	14798498	14798617	peak_16130	120	+	NP_exon	a97bce15-4343-4685-86f6-8207242b32d0.trans
a97bce15-4343-4685-86f6-8207242b32d0	NC_040066.1	14798498	14798617	peak_16131	120	+	NP_exon	a97bce15-4343-4685-86f6-8207242b32d0.trans
TGM2	NC_040066.1	15366362	15366652	peak_16161	291	+	PR_intron	rna-XM_027472752.1
UBE2C	NC_040066.1	15525589	15525677	peak_16167	89	+	utr3	rna-XM_027472810.1
MRPS12	NC_040046.1	49191494	49191552	peak_1617	59	-	cds	rna-XM_005009004.3
LOC101792660	NC_040066.1	15876769	15876919	peak_16185	151	+	PR_intron	rna-XM_027472878.1
NECAB3	NC_040066.1	2862877	2863055	peak_16228	179	-	utr3	rna-XM_027472913.1
NECAB3	NC_040066.1	2866810	2866929	peak_16229	120	-	cds	rna-XM_027472913.1
GDF5	NC_040066.1	6216442	6216919	peak_16267	478	-	cds	rna-XM_021271325.2
GDF5	NC_040066.1	6218723	6219021	peak_16268	299	-	cds	rna-XM_021271325.2
LOC101801823	NC_040066.1	7412828	7412889	peak_16302	62	-	NP_exon	rna-XR_003501515.1
RIPOR3	NC_040066.1	7617058	7617209	peak_16303	152	-	cds	rna-XM_027473157.1
RIPOR3	NC_040066.1	7659947	7660401	peak_16304	455	-	PR_intron	rna-XM_021276771.2
FGF14	NC_040046.1	55089257	55089377	peak_1631	121	-	cds	rna-XM_027443782.1
KCNG1	NC_040066.1	7808612	7809032	peak_16311	421	-	cds	rna-XM_021276739.2
LOC113845755	NC_040066.1	8805018	8805108	peak_16326	91	-	utr3	rna-XM_027473146.1
BCAS1	NC_040066.1	8933406	8940116	peak_16327	6711	-	PR_intron	rna-XM_021276649.2
BMP7	NC_040066.1	9984175	9984236	peak_16331	62	-	utr5	rna-XM_005010474.4
8dd127f1-6253-4041-821d-da1f2fe393ff	NC_040066.1	12555858	12556007	peak_16347	150	-	NP_exon	8dd127f1-6253-4041-821d-da1f2fe393ff.trans
8dd127f1-6253-4041-821d-da1f2fe393ff	NC_040066.1	12555872	12555993	peak_16348	122	-	NP_exon	8dd127f1-6253-4041-821d-da1f2fe393ff.trans
RBBP8NL	NC_040066.1	12559401	12559851	peak_16349	451	-	cds	rna-XM_021278653.2
RBBP8NL	NC_040066.1	12564677	12566301	peak_16350	1625	-	PR_intron	rna-XM_021278653.2
ANGPT4	NC_040066.1	14870146	14870542	peak_16396	397	-	PR_intron	rna-XM_027472766.1
LOC101796142	NC_040066.1	14948768	14948859	peak_16399	92	-	utr3	rna-XM_027472817.1
LOC101796142	NC_040066.1	14948767	14948857	peak_16400	91	-	utr3	rna-XM_027472817.1
BPI	NC_040066.1	15323127	15323217	peak_16411	91	-	utr3	rna-XM_027472774.1
LOC113845720	NC_040066.1	15516621	15517070	peak_16416	450	-	cds	rna-XM_027472791.1
PLTP	NC_040066.1	15549386	15549535	peak_16418	150	-	utr3	rna-XM_027442898.1
LOC113845729	NC_040066.1	15573602	15573723	peak_16419	122	-	PR_intron	rna-XM_027472826.1
LOC113845729	NC_040066.1	15574732	15574889	peak_16420	158	-	cds	rna-XM_027472825.1
6eedac56-73df-4aae-bd2a-22449de0b991	NC_040067.1	480062	480123	peak_16435	62	+	NP_exon	6eedac56-73df-4aae-bd2a-22449de0b991.trans
6eedac56-73df-4aae-bd2a-22449de0b991	NC_040067.1	480063	480123	peak_16436	61	+	NP_exon	6eedac56-73df-4aae-bd2a-22449de0b991.trans
ECE1	NC_040067.1	539208	539299	peak_16441	92	+	utr3	rna-XM_027443132.1
PINK1	NC_040067.1	2220058	2220148	peak_16500	91	+	utr3	rna-XM_027443229.1
TMEM240	NC_040067.1	4476988	4477168	peak_16537	181	+	utr3	rna-XM_027443302.1
MXRA8	NC_040067.1	4598907	4598968	peak_16543	62	+	utr5	rna-XM_027443263.1
MXRA8	NC_040067.1	4622421	4622482	peak_16544	62	+	utr3	rna-XM_027443263.1
MEGF6	NC_040067.1	6941146	6941236	peak_16579	91	+	utr5	rna-XM_027443352.1
PANK4	NC_040067.1	7572676	7572826	peak_16583	151	+	cds	rna-XM_027443155.1
PANK4	NC_040067.1	7594542	7594692	peak_16584	151	+	utr3	rna-XM_027443155.1
EPHA2	NC_040067.1	936610	937090	peak_16608	481	-	PR_intron	rna-XM_027443238.1
ATP13A2	NC_040067.1	1052366	1052755	peak_16612	390	-	PR_intron	rna-XM_013093079.3
67923b3d-0c28-4aa1-bfe3-59ffdbb950c2	NC_040067.1	1749268	1750137	peak_16624	870	-	NP_exon	67923b3d-0c28-4aa1-bfe3-59ffdbb950c2.trans
LOC101791359	NC_040067.1	2861109	2861228	peak_16655	120	-	cds	rna-XM_027443333.1
7f4a7616-a5ed-447e-9cb8-3113b5244615	NC_040067.1	2907963	2908113	peak_16657	151	-	NP_exon	7f4a7616-a5ed-447e-9cb8-3113b5244615.trans
7f4a7616-a5ed-447e-9cb8-3113b5244615	NC_040067.1	2907936	2908057	peak_16658	122	-	NP_exon	7f4a7616-a5ed-447e-9cb8-3113b5244615.trans
LOC101794174	NC_040067.1	4732413	4732593	peak_16705	181	-	cds	rna-XM_005008824.4
KLHL17	NC_040067.1	5414382	5414443	peak_16720	62	-	utr3	rna-XM_027443382.1
KCNAB2	NC_040067.1	6503083	6503353	peak_16747	271	-	utr3	rna-XM_027443402.1
AJAP1	NC_040067.1	6690892	6691012	peak_16748	121	-	utr3	rna-XM_027443408.1
AJAP1	NC_040067.1	6693221	6693491	peak_16749	271	-	utr3	rna-XM_027443408.1
AJAP1	NC_040067.1	6690901	6690992	peak_16750	92	-	utr3	rna-XM_027443408.1
AJAP1	NC_040067.1	6693208	6693509	peak_16751	302	-	utr3	rna-XM_027443408.1
AJAP1	NC_040067.1	6716985	6717166	peak_16752	182	-	cds	rna-XM_027443408.1
PLCH2	NC_040067.1	7611872	7612112	peak_16760	241	-	cds	rna-XM_013091641.3
PLCH2	NC_040067.1	7612978	7613189	peak_16761	212	-	cds	rna-XM_013091641.3
PLCH2	NC_040067.1	7693047	7693706	peak_16762	660	-	PR_intron	rna-XM_013091641.3
22cd77b5-bcfd-4188-8141-153c8969609f	NC_040068.1	54578	54666	peak_16775	89	+	NP_exon	22cd77b5-bcfd-4188-8141-153c8969609f.trans
ASH2L	NC_040068.1	1667978	1668157	peak_16810	180	+	utr3	rna-XM_027443529.1
ZMAT4	NC_040068.1	2010946	2011127	peak_16871	182	-	utr3	rna-XM_005029474.4
ZMAT4	NC_040068.1	2013075	2020555	peak_16872	7481	-	PR_intron	rna-XM_005029474.4
SFRP1	NC_040068.1	2101500	2101591	peak_16873	92	-	utr3	rna-XM_027443614.1
SFRP1	NC_040068.1	2102068	2102637	peak_16874	570	-	utr3	rna-XM_027443614.1
SFRP1	NC_040068.1	2102875	2109912	peak_16875	7038	-	PR_intron	rna-XM_027443614.1
SFRP1	NC_040068.1	2113633	2113754	peak_16876	122	-	cds	rna-XM_027443614.1
SFRP1	NC_040068.1	2113813	2113993	peak_16877	181	-	cds	rna-XM_027443614.1
f91399a1-ba66-423e-a5d1-55b3aa84c871	NC_040069.1	44392	44513	peak_16893	122	+	NP_exon	f91399a1-ba66-423e-a5d1-55b3aa84c871.trans
f91399a1-ba66-423e-a5d1-55b3aa84c871	NC_040069.1	44395	44513	peak_16894	119	+	NP_exon	f91399a1-ba66-423e-a5d1-55b3aa84c871.trans
GJB3	NC_040069.1	975274	975424	peak_16909	151	+	utr3	rna-XM_005025368.4
GJB3	NC_040069.1	975602	975723	peak_16910	122	+	utr3	rna-XM_005025368.4
TFAP2E	NC_040069.1	1176993	1177473	peak_16918	481	+	utr3	rna-XM_027443818.1
TFAP2E	NC_040069.1	1177532	1177922	peak_16919	391	+	utr3	rna-XM_027443818.1
LOC101790434	NC_040069.1	1273135	1273492	peak_16921	358	+	PR_intron	rna-XM_027443807.1
DNALI1	NC_040069.1	1927003	1927062	peak_16935	60	+	cds	rna-XM_027444060.1
MANEAL	NC_040069.1	2143211	2143451	peak_16936	241	+	utr3	rna-XM_027443738.1
PDIK1L	NC_040069.1	2588244	2589250	peak_16939	1007	+	PR_intron	rna-XM_027443902.1
RPS6KA1	NC_040069.1	2755042	2755193	peak_16952	152	+	utr3	rna-XM_027443870.1
SFN	NC_040069.1	2882576	2883078	peak_16962	503	+	cds	rna-XM_013097499.2
SFN	NC_040069.1	2883520	2883580	peak_16963	61	+	utr3	rna-XM_013097499.2
DLGAP3	NC_040069.1	996977	997068	peak_17047	92	-	cds	rna-XM_027443828.1
LOC101796567	NC_040069.1	1106619	1106828	peak_17051	210	-	NP_exon	rna-XR_003492353.1
CSF3R	NC_040069.1	1539551	1539641	peak_17069	91	-	utr5	rna-XM_027443961.1
RSPO1	NC_040069.1	1948250	1949776	peak_17077	1527	-	PR_intron	rna-XM_027444002.1
RSPO1	NC_040069.1	1951254	1953415	peak_17078	2162	-	PR_intron	rna-XM_027444002.1
RSPO1	NC_040069.1	1961042	1961103	peak_17079	62	-	PR_intron	rna-XM_027444003.1
RSPO1	NC_040069.1	1961377	1973754	peak_17080	12378	-	PR_intron	rna-XM_027444003.1
CRYBG2	NC_040069.1	2657515	2657695	peak_17093	181	-	cds	rna-XM_027443852.1
CRYBG2	NC_040069.1	2658023	2658203	peak_17094	181	-	cds	rna-XM_027443852.1
CRYBG2	NC_040069.1	2658351	2658502	peak_17095	152	-	cds	rna-XM_027443852.1
MAP3K6	NC_040069.1	3048066	3048187	peak_17106	122	-	utr3	rna-XM_027443930.1
OPRD1	NC_040069.1	3314695	3315053	peak_17111	359	-	utr3	rna-XM_013103259.3
OPRD1	NC_040069.1	3315141	3315201	peak_17112	61	-	utr3	rna-XM_013103259.3
CTPS1	NC_040069.1	5660008	5660477	peak_17141	470	-	PR_intron	rna-XM_027443837.1
PTAFR	NC_040069.1	6077093	6081431	peak_17147	4339	-	PR_intron	rna-XM_005025264.4
HYLS1	NC_040070.1	65306	65457	peak_17158	152	+	PR_intron	rna-XM_027444285.1
NRGN	NC_040070.1	80510	82647	peak_17161	2138	+	PR_intron	rna-XM_027444296.1
RASL11A	NC_040046.1	20443428	20443517	peak_172	90	+	utr3	rna-XM_027469581.1
POU2F3	NC_040070.1	4171997	4172088	peak_17210	92	+	cds	rna-XM_013103116.3
POU2F3	NC_040070.1	4211298	4211358	peak_17211	61	+	utr3	rna-XM_013103116.3
CDON	NC_040070.1	316302	316393	peak_17257	92	-	cds	rna-XM_027444255.1
FAM118B	NC_040070.1	428767	428858	peak_17262	92	-	cds	rna-XM_013099615.3
OPCML	NC_040070.1	2739453	2739603	peak_17285	151	-	PR_intron	rna-XM_027444204.1
LOC106020168	NC_040070.1	3338317	3338437	peak_17291	121	-	cds	rna-XM_027444382.1
LOC106020168	NC_040070.1	3339631	3340980	peak_17292	1350	-	PR_intron	rna-XM_027444382.1
COLCA2	NC_040070.1	3653390	3654014	peak_17296	625	-	PR_intron	rna-XM_027444157.1
HMBS	NC_040070.1	5394195	5396085	peak_17319	1891	-	PR_intron	rna-XM_027444343.1
APOA1	NC_040070.1	6403348	6403437	peak_17352	90	-	cds	rna-XM_027444321.1
DSCAML1	NC_040070.1	6668978	6669069	peak_17357	92	-	utr5	rna-XM_027444162.1
SV2A	NC_040071.1	664890	665217	peak_17398	328	+	cds	rna-XM_027444586.1
MLLT11	NC_040071.1	777833	777894	peak_17406	62	+	utr3	rna-XM_027444456.1
MLLT11	NC_040071.1	778223	778554	peak_17407	332	+	utr3	rna-XM_027444456.1
GMIP	NC_040071.1	1126640	1127332	peak_17420	693	+	PR_intron	rna-XM_027444460.1
LOC101793233	NC_040071.1	1300754	1300874	peak_17429	121	+	cds	rna-XM_027444595.1
IQGAP3	NC_040071.1	249178	249387	peak_17455	210	-	PR_intron	rna-XM_027444618.1
IQGAP3	NC_040071.1	255603	255723	peak_17456	121	-	utr5	rna-XM_027444618.1
LOC113839888	NC_040071.1	510137	510228	peak_17471	92	-	utr5	rna-XM_027444604.1
FBXL12	NC_040071.1	1234852	1235031	peak_17498	180	-	cds	rna-XM_027444594.1
OLFM2	NC_040071.1	1270054	1270233	peak_17499	180	-	cds	rna-XM_027444592.1
MTUS2	NC_040046.1	21141826	21142096	peak_175	271	+	cds	rna-XM_027469748.1
VAV1	NC_040071.1	1321570	1321661	peak_17501	92	-	cds	rna-XM_027444446.1
C27H6orf132	NC_040072.1	1539625	1539776	peak_17538	152	+	cds	rna-XM_027444751.1
244ad55e-fd45-4582-abea-8450d46c229a	NC_040072.1	1540760	1540940	peak_17539	181	+	NP_exon	244ad55e-fd45-4582-abea-8450d46c229a.trans
244ad55e-fd45-4582-abea-8450d46c229a	NC_040072.1	1540751	1540930	peak_17540	180	+	NP_exon	244ad55e-fd45-4582-abea-8450d46c229a.trans
WNT2B	NC_040072.1	1971514	1971844	peak_17546	331	+	cds	rna-XM_027444919.1
WNT2B	NC_040072.1	1971992	1972501	peak_17547	510	+	utr3	rna-XM_027444919.1
FAM19A3	NC_040072.1	2057895	2057986	peak_17548	92	+	NP_intron	rna-XR_003492603.1
RAB29	NC_040072.1	2298461	2298612	peak_17554	152	+	utr3	rna-XM_027444683.1
RAB29	NC_040072.1	2298881	2299092	peak_17555	212	+	utr3	rna-XM_027444683.1
LGR6	NC_040072.1	2539739	2539830	peak_17563	92	+	cds	rna-XM_027444874.1
600faf63-ba3e-41be-a5a9-d535ac6f2efd	NC_040072.1	2797016	2797161	peak_17581	146	+	NP_exon	600faf63-ba3e-41be-a5a9-d535ac6f2efd.trans
TMEM9	NC_040072.1	3117143	3117203	peak_17589	61	+	utr3	rna-XM_027444994.1
LOC113840609	NC_040046.1	70375988	70376762	peak_1759	775	-	NP_intron	gene-LOC113840609.trans
MTUS2	NC_040046.1	21142784	21142875	peak_176	92	+	cds	rna-XM_027469748.1
TULP1	NC_040072.1	4835461	4835641	peak_17624	181	+	utr5	rna-XM_027444905.1
TULP1	NC_040072.1	4835973	4836379	peak_17625	407	+	cds	rna-XM_027444905.1
TULP1	NC_040072.1	4839955	4840134	peak_17626	180	+	utr3	rna-XM_027444905.1
C27H1orf116	NC_040072.1	803809	804020	peak_17668	212	-	utr3	rna-XM_027444772.1
C27H1orf116	NC_040072.1	804228	804438	peak_17669	211	-	utr3	rna-XM_027444772.1
C27H1orf116	NC_040072.1	805125	805275	peak_17670	151	-	cds	rna-XM_027444772.1
KCND3	NC_040072.1	1665461	1665522	peak_17686	62	-	utr3	rna-XM_027444755.1
KCND3	NC_040072.1	1668516	1668697	peak_17687	182	-	utr3	rna-XM_027444755.1
KCND3	NC_040072.1	1668846	1670820	peak_17688	1975	-	PR_intron	rna-XM_027444755.1
KCND3	NC_040072.1	1777041	1777162	peak_17689	122	-	cds	rna-XM_027444757.1
MTUS2	NC_040046.1	21310596	21310657	peak_177	62	+	utr3	rna-XM_027469748.1
01bc8665-e9e3-449a-b671-64acbfe92d99	NC_040072.1	3274945	3275005	peak_17710	61	-	NP_exon	01bc8665-e9e3-449a-b671-64acbfe92d99.trans
LOC113839921	NC_040072.1	3281847	3281968	peak_17711	122	-	utr3	rna-XM_027444861.1
PIK3C2B	NC_040072.1	3944843	3944904	peak_17727	62	-	utr3	rna-XM_027445092.1
ZNF76	NC_040072.1	4945997	4946208	peak_17759	212	-	utr3	rna-XM_027444710.1
ZNF76	NC_040072.1	4948583	4949118	peak_17760	536	-	PR_intron	rna-XM_027444710.1
ZNF76	NC_040072.1	4951153	4951642	peak_17761	490	-	PR_intron	rna-XM_027444710.1
SCUBE3	NC_040072.1	4963719	4964140	peak_17762	422	-	utr3	rna-XM_027444702.1
SCUBE3	NC_040072.1	5000478	5000659	peak_17763	182	-	utr5	rna-XM_027444702.1
PRKX	NC_040046.1	70702582	70702733	peak_1777	152	-	cds	rna-XM_027447386.1
OARD1	NC_040072.1	5635893	5636043	peak_17779	151	-	utr3	rna-XM_005026826.4
WNT3	NC_040073.1	1776316	1776526	peak_17798	211	+	cds	rna-XM_005027845.4
WNT3	NC_040073.1	1776703	1776854	peak_17799	152	+	utr3	rna-XM_005027845.4
ITGB3	NC_040073.1	1968787	1968848	peak_17801	62	+	utr3	rna-XM_027445792.1
EFCAB3	NC_040073.1	1981137	1981402	peak_17802	266	+	cds	rna-XM_027445790.1
ZNF385C	NC_040073.1	3025939	3026090	peak_17829	152	+	utr3	rna-XM_027445196.1
ZNF385C	NC_040073.1	3027104	3027165	peak_17830	62	+	utr3	rna-XM_027445196.1
LOC113839947	NC_040073.1	3151627	3151687	peak_17836	61	+	utr3	rna-XM_027445207.1
LOC101793676	NC_040073.1	3239245	3239306	peak_17838	62	+	cds	rna-XM_005029339.4
LOC101792676	NC_040073.1	3341187	3341715	peak_17840	529	+	PR_intron	rna-XM_013109172.3
LOC101792676	NC_040073.1	3343148	3343329	peak_17841	182	+	utr3	rna-XM_013109172.3
57b5f6b5-bcf7-4305-a6cb-6434409a2f31	NC_040073.1	4220915	4221035	peak_17867	121	+	NP_exon	57b5f6b5-bcf7-4305-a6cb-6434409a2f31.trans
57b5f6b5-bcf7-4305-a6cb-6434409a2f31	NC_040073.1	4220927	4221047	peak_17868	121	+	NP_exon	57b5f6b5-bcf7-4305-a6cb-6434409a2f31.trans
SOST	NC_040073.1	4253295	4253506	peak_17869	212	+	cds	rna-XM_005026106.4
VAT1	NC_040073.1	4440064	4440125	peak_17876	62	+	cds	rna-XM_027445516.1
FANCB	NC_040046.1	76952353	76952594	peak_1790	242	-	cds	rna-XM_005015184.4
ASB9	NC_040046.1	77180482	77180840	peak_1791	359	-	utr3	rna-XM_005015179.3
LOC101800911	NC_040073.1	5434566	5434837	peak_17922	272	+	utr3	rna-XM_027445630.1
LOC101800911	NC_040073.1	5434926	5435107	peak_17923	182	+	utr3	rna-XM_027445630.1
LOC101799146	NC_040073.1	5440839	5443295	peak_17924	2457	+	PR_intron	rna-XM_027445464.1
LOC101799146	NC_040073.1	5445199	5445477	peak_17925	279	+	cds	rna-XM_027445464.1
LOC101799146	NC_040073.1	5446165	5446316	peak_17926	152	+	utr3	rna-XM_027445464.1
LOC101799579	NC_040073.1	5452470	5452621	peak_17927	152	+	cds	rna-XM_005030624.4
LOC101799579	NC_040073.1	5456138	5456481	peak_17928	344	+	PR_intron	rna-XM_005030624.4
LOC106020364	NC_040073.1	5594019	5594198	peak_17929	180	+	PR_intron	rna-XM_021279293.2
GALNT6	NC_040073.1	5651311	5651461	peak_17930	151	+	utr3	rna-XM_027445459.1
INHBC	NC_040073.1	6041112	6041172	peak_17948	61	+	cds	rna-XM_027445539.1
INHBC	NC_040073.1	6041497	6041646	peak_17949	150	+	cds	rna-XM_027445539.1
SCML2	NC_040046.1	78575696	78575876	peak_1795	181	-	utr3	rna-XM_027448130.1
SCML2	NC_040046.1	78576084	78576174	peak_1796	91	-	utr3	rna-XM_027448130.1
ASB8	NC_040073.1	6123549	6123699	peak_17960	151	+	cds	rna-XM_027445571.1
HOXC12	NC_040073.1	6393231	6393291	peak_17964	61	+	utr3	rna-XM_005027449.4
HOXC10	NC_040073.1	6426847	6427086	peak_17965	240	+	cds	rna-XM_005027447.4
HOXC9	NC_040073.1	6440210	6440329	peak_17966	120	+	cds	rna-XM_021277504.2
SCML2	NC_040046.1	78576322	78577886	peak_1797	1565	-	PR_intron	rna-XM_027448130.1
LOC101790674	NC_040073.1	6576522	6576702	peak_17976	181	+	cds	rna-XM_013101423.2
LOC101790674	NC_040073.1	6579110	6579291	peak_17977	182	+	utr3	rna-XM_013101423.2
LOC101790674	NC_040073.1	6580278	6580428	peak_17978	151	+	utr3	rna-XM_013101423.2
ACVRL1	NC_040073.1	7025431	7025491	peak_17991	61	+	utr5	rna-XM_027445748.1
LOC101800206	NC_040073.1	114492	114643	peak_17997	152	-	utr3	id-LOC101800206
B3GLCT	NC_040046.1	21761687	21761748	peak_180	62	+	cds	rna-XM_027470010.1
CCDC103	NC_040073.1	1427841	1428110	peak_18014	270	-	cds	rna-XM_027445311.1
MAP3K15	NC_040046.1	79054906	79060136	peak_1802	5231	-	PR_intron	rna-XM_027448311.1
WNT9B	NC_040073.1	1689615	1689793	peak_18020	179	-	utr3	rna-XM_021277711.2
LOC101790203	NC_040073.1	2825414	2825534	peak_18028	121	-	utr3	rna-XM_027445278.1
f3999bf1-6315-4ebb-9e5e-9814b3ef63f7	NC_040073.1	3534471	3534796	peak_18037	326	-	NP_exon	f3999bf1-6315-4ebb-9e5e-9814b3ef63f7.trans
f3999bf1-6315-4ebb-9e5e-9814b3ef63f7	NC_040073.1	3534471	3534802	peak_18038	332	-	NP_exon	f3999bf1-6315-4ebb-9e5e-9814b3ef63f7.trans
RND2	NC_040073.1	4415109	4415319	peak_18065	211	-	cds	rna-XM_027445598.1
RND2	NC_040073.1	4428993	4429114	peak_18066	122	-	utr5	rna-XM_027445597.1
LOC101790937	NC_040073.1	4447314	4447375	peak_18067	62	-	utr3	rna-XM_027445517.1
LOC101790937	NC_040073.1	4448753	4449024	peak_18068	272	-	cds	rna-XM_027445517.1
G6PC	NC_040073.1	4473255	4473316	peak_18074	62	-	utr3	rna-XM_027445511.1
ddb5325f-dbcd-4e14-853b-4d16b4b39f0a	NC_040073.1	4481140	4481201	peak_18075	62	-	NP_exon	ddb5325f-dbcd-4e14-853b-4d16b4b39f0a.trans
ddb5325f-dbcd-4e14-853b-4d16b4b39f0a	NC_040073.1	4481140	4481200	peak_18076	61	-	NP_exon	ddb5325f-dbcd-4e14-853b-4d16b4b39f0a.trans
HOXB1	NC_040073.1	4979373	4979493	peak_18087	121	-	utr3	rna-XM_027445545.1
HOXB1	NC_040073.1	4981206	4981416	peak_18088	211	-	cds	rna-XM_027445545.1
HOXB2	NC_040073.1	4992260	4992408	peak_18089	149	-	cds	rna-XM_027445558.1
HOXB2	NC_040073.1	4992466	4992643	peak_18090	178	-	cds	rna-XM_027445558.1
3d037e25-dd80-4709-86ae-5bbc364d6e39	NC_040046.1	22189400	22189790	peak_181	391	+	NP_exon	3d037e25-dd80-4709-86ae-5bbc364d6e39.trans
GIP	NC_040073.1	5185668	5185817	peak_18104	150	-	utr3	rna-XM_005026146.4
GNGT2	NC_040073.1	5251016	5251779	peak_18105	764	-	PR_intron	rna-XM_005026145.4
RIPK4	NC_040046.1	79610258	79610408	peak_1811	151	-	utr3	rna-XM_027448389.1
LOC101797392	NC_040073.1	5521546	5521607	peak_18114	62	-	PR_intron	rna-XM_021279302.2
aad0a889-d4bb-4a81-873a-1c729199aebb	NC_040073.1	5550508	5550598	peak_18115	91	-	NP_exon	aad0a889-d4bb-4a81-873a-1c729199aebb.trans
aad0a889-d4bb-4a81-873a-1c729199aebb	NC_040073.1	5550503	5550593	peak_18116	91	-	NP_exon	aad0a889-d4bb-4a81-873a-1c729199aebb.trans
SLC4A8	NC_040073.1	5609185	5609336	peak_18117	152	-	utr3	rna-XM_005030606.4
SLC4A8	NC_040073.1	5621681	5622023	peak_18118	343	-	PR_intron	rna-XM_005030606.4
RIPK4	NC_040046.1	79610675	79610944	peak_1812	270	-	utr3	rna-XM_027448389.1
6ac2181b-3909-4bfe-87ff-4a13ee0c62ef	NC_040073.1	5840761	5840908	peak_18126	148	-	NP_exon	6ac2181b-3909-4bfe-87ff-4a13ee0c62ef.trans
6ac2181b-3909-4bfe-87ff-4a13ee0c62ef	NC_040073.1	5840770	5840920	peak_18128	151	-	NP_exon	6ac2181b-3909-4bfe-87ff-4a13ee0c62ef.trans
RIPK4	NC_040046.1	79611003	79611302	peak_1813	300	-	cds	rna-XM_027448389.1
MARS	NC_040073.1	6103538	6103695	peak_18136	158	-	PR_intron	rna-XM_027445432.1
TMEM106C	NC_040073.1	6177497	6177618	peak_18139	122	-	utr3	rna-XM_027445584.1
ATF7	NC_040073.1	6308960	6309080	peak_18140	121	-	utr5	rna-XM_027445494.1
IFT22	NC_040074.1	444842	445192	peak_18162	351	+	PR_intron	rna-XM_027445936.1
ABHD11	NC_040074.1	3755475	3755714	peak_18191	240	+	utr3	rna-XM_027446018.1
3d037e25-dd80-4709-86ae-5bbc364d6e39	NC_040046.1	22189370	22189790	peak_182	421	+	NP_exon	3d037e25-dd80-4709-86ae-5bbc364d6e39.trans
RSPH1	NC_040046.1	80023514	80025777	peak_1826	2264	-	PR_intron	rna-XM_027448666.1
RSPH1	NC_040046.1	80030607	80030990	peak_1827	384	-	PR_intron	rna-XM_027448666.1
ATP8B1	NC_040075.1	458903	460295	peak_18270	1393	+	PR_intron	rna-XM_027447168.1
ATP8B1	NC_040075.1	481640	481880	peak_18271	241	+	utr3	rna-XM_027447170.1
CCDC68	NC_040075.1	1098633	1099203	peak_18278	571	+	PR_intron	rna-XM_027446963.1
CCDC68	NC_040075.1	1100495	1100556	peak_18279	62	+	utr3	rna-XM_027446963.1
STARD6	NC_040075.1	1146591	1146652	peak_18280	62	+	PR_intron	rna-XM_005011788.4
HDHD2	NC_040075.1	2764155	2765910	peak_18295	1756	+	PR_intron	rna-XM_027446979.1
ST8SIA5	NC_040075.1	2849630	2869961	peak_18299	20332	+	PR_intron	rna-XM_027446983.1
ST8SIA5	NC_040075.1	2907673	2907824	peak_18300	152	+	cds	rna-XM_027446985.1
SYT4	NC_040075.1	4382729	4382879	peak_18306	151	+	cds	rna-XM_027446831.1
LOC101800581	NC_040075.1	9826307	9826368	peak_18329	62	+	cds	rna-XM_027446377.1
ICOSLG	NC_040046.1	80919011	80919102	peak_1834	92	-	utr3	rna-XM_027448870.1
SPEF2	NC_040075.1	11361181	11363738	peak_18343	2558	+	PR_intron	rna-XM_027446628.1
ICOSLG	NC_040046.1	80924958	80925079	peak_1835	122	-	cds	rna-XM_027448870.1
a2022f89-f5d7-4e60-961e-74b54b42d31d	NC_040075.1	12770813	12770994	peak_18355	182	+	NP_exon	a2022f89-f5d7-4e60-961e-74b54b42d31d.trans
a2022f89-f5d7-4e60-961e-74b54b42d31d	NC_040075.1	12770815	12770995	peak_18356	181	+	NP_exon	a2022f89-f5d7-4e60-961e-74b54b42d31d.trans
PTGER4	NC_040075.1	13348479	13348959	peak_18357	481	+	cds	rna-XM_027446653.1
HSPB3	NC_040075.1	16903104	16903254	peak_18373	151	+	cds	rna-XM_013105004.2
IPO11	NC_040075.1	19989233	19989354	peak_18392	122	+	cds	rna-XM_027446244.1
3fe4376e-e3a3-4b73-beba-cf4b1c693f20	NC_040075.1	20030845	20031026	peak_18393	182	+	NP_exon	3fe4376e-e3a3-4b73-beba-cf4b1c693f20.trans
3fe4376e-e3a3-4b73-beba-cf4b1c693f20	NC_040075.1	20030847	20031028	peak_18394	182	+	NP_exon	3fe4376e-e3a3-4b73-beba-cf4b1c693f20.trans
MRPS36	NC_040075.1	22362541	22362659	peak_18417	119	+	utr3	rna-XM_027446139.1
DMGDH	NC_040075.1	22882641	22885410	peak_18419	2770	+	PR_intron	rna-XM_027446181.1
DMGDH	NC_040075.1	22887660	22900576	peak_18420	12917	+	PR_intron	rna-XM_027446181.1
c46bd0c3-f507-4d22-8b5d-6203d336e3b1	NC_040075.1	22900498	22900617	peak_18421	120	+	NP_exon	c46bd0c3-f507-4d22-8b5d-6203d336e3b1.trans
POC5	NC_040075.1	24271311	24273704	peak_18431	2394	+	PR_intron	rna-XM_027446695.1
UTP15	NC_040075.1	25158520	25158641	peak_18443	122	+	cds	rna-XM_027446437.1
UTP15	NC_040075.1	25158699	25158880	peak_18444	182	+	utr3	rna-XM_027446437.1
199ce38e-28d4-4b64-ae7c-43706d894f71	NC_040075.1	26380456	26380842	peak_18457	387	+	NP_exon	199ce38e-28d4-4b64-ae7c-43706d894f71.trans
4101b97c-6f5f-4cd9-b366-b96b9d3f7034	NC_040075.1	27538136	27538316	peak_18466	181	+	NP_exon	4101b97c-6f5f-4cd9-b366-b96b9d3f7034.trans
4101b97c-6f5f-4cd9-b366-b96b9d3f7034	NC_040075.1	27538110	27538280	peak_18467	171	+	NP_exon	4101b97c-6f5f-4cd9-b366-b96b9d3f7034.trans
bf1fbc75-643e-45ad-b066-cf533837eb73	NC_040075.1	30809634	30809960	peak_18482	327	+	NP_exon	bf1fbc75-643e-45ad-b066-cf533837eb73.trans
50d81f03-f9c8-4684-ab96-0e936f5c0cc6	NC_040075.1	32940983	32941074	peak_18505	92	+	NP_exon	50d81f03-f9c8-4684-ab96-0e936f5c0cc6.trans
50d81f03-f9c8-4684-ab96-0e936f5c0cc6	NC_040075.1	32940976	32941063	peak_18506	88	+	NP_exon	50d81f03-f9c8-4684-ab96-0e936f5c0cc6.trans
ACER2	NC_040075.1	33785256	33785316	peak_18514	61	+	utr3	rna-XM_027446179.1
ACER2	NC_040075.1	33785259	33785316	peak_18515	58	+	utr3	rna-XM_027446179.1
CEMIP2	NC_040075.1	36270542	36270753	peak_18523	212	+	cds	rna-XM_027446319.1
CEMIP2	NC_040075.1	36286391	36288660	peak_18524	2270	+	PR_intron	rna-XM_027446319.1
f15799da-82bd-4eb4-8e04-9767cc1a2e41	NC_040075.1	36296248	36296369	peak_18525	122	+	NP_exon	f15799da-82bd-4eb4-8e04-9767cc1a2e41.trans
f15799da-82bd-4eb4-8e04-9767cc1a2e41	NC_040075.1	36296191	36296371	peak_18526	181	+	NP_exon	f15799da-82bd-4eb4-8e04-9767cc1a2e41.trans
PSAT1	NC_040075.1	37861682	37864371	peak_18537	2690	+	PR_intron	rna-XM_027446497.1
IL1RAPL1	NC_040046.1	86495756	86495817	peak_1854	62	-	cds	rna-XM_027449031.1
LOC101797239	NC_040075.1	41704266	41707233	peak_18548	2968	+	PR_intron	rna-XM_027446167.1
21dda10c-7164-4e23-80cd-e6f37183df07	NC_040075.1	41923115	41923294	peak_18553	180	+	NP_exon	21dda10c-7164-4e23-80cd-e6f37183df07.trans
21dda10c-7164-4e23-80cd-e6f37183df07	NC_040075.1	41923110	41923290	peak_18554	181	+	NP_exon	21dda10c-7164-4e23-80cd-e6f37183df07.trans
SYK	NC_040075.1	44839458	44839906	peak_18567	449	+	PR_intron	rna-XM_027446517.1
764b8ce2-2ab6-45e1-a645-759038624d54	NC_040075.1	49989901	49990110	peak_18587	210	+	NP_exon	764b8ce2-2ab6-45e1-a645-759038624d54.trans
LOC101793291	NC_040075.1	49991632	49991693	peak_18588	62	+	utr3	rna-XM_027446806.1
LOC101793291	NC_040075.1	49992856	49992947	peak_18589	92	+	utr3	rna-XM_027446806.1
764b8ce2-2ab6-45e1-a645-759038624d54	NC_040075.1	49989890	49990130	peak_18590	241	+	NP_exon	764b8ce2-2ab6-45e1-a645-759038624d54.trans
LOC101793291	NC_040075.1	49991627	49991688	peak_18591	62	+	utr3	rna-XM_027446806.1
LOC101793291	NC_040075.1	49992855	49992946	peak_18592	92	+	utr3	rna-XM_027446806.1
GAK	NC_040075.1	50230113	50230234	peak_18593	122	+	cds	rna-XM_027446922.1
GAK	NC_040075.1	50247831	50248072	peak_18594	242	+	utr3	rna-XM_027446922.1
PCGF3	NC_040075.1	50827761	50828894	peak_18597	1134	+	PR_intron	rna-XM_027446732.1
LNPEP	NC_040075.1	51839655	51861403	peak_18598	21749	+	PR_intron	rna-XM_027446142.1
PAM	NC_040075.1	53380771	53380892	peak_18601	122	+	cds	rna-XM_027447068.1
d20de64f-fba8-455f-8bd0-c21c568beaf5	NC_040075.1	53492398	53492459	peak_18604	62	+	NP_exon	d20de64f-fba8-455f-8bd0-c21c568beaf5.trans
d20de64f-fba8-455f-8bd0-c21c568beaf5	NC_040075.1	53492398	53492460	peak_18605	63	+	NP_exon	d20de64f-fba8-455f-8bd0-c21c568beaf5.trans
c24b93de-312e-4178-bc07-67f6dbbfbf20	NC_040075.1	55891533	55891654	peak_18607	122	+	NP_exon	c24b93de-312e-4178-bc07-67f6dbbfbf20.trans
MAN2A1	NC_040075.1	56093237	56093417	peak_18608	181	+	cds	rna-XM_027447071.1
LOC113840190	NC_040075.1	58410029	58410174	peak_18634	146	+	NP_exon	rna-XR_003492965.1
ATG12	NC_040075.1	62783798	62783948	peak_18651	151	+	utr3	rna-XM_027446245.1
LOC101791936	NC_040075.1	62902411	62903551	peak_18653	1141	+	PR_intron	rna-XM_027447083.1
LOC101790800	NC_040075.1	63727337	63727428	peak_18670	92	+	cds	rna-XM_005031685.4
dec7ae8c-a586-48bf-a681-1eb310b2d7b2	NC_040075.1	65629373	65629434	peak_18673	62	+	NP_exon	dec7ae8c-a586-48bf-a681-1eb310b2d7b2.trans
dec7ae8c-a586-48bf-a681-1eb310b2d7b2	NC_040075.1	65630062	65630153	peak_18674	92	+	NP_exon	dec7ae8c-a586-48bf-a681-1eb310b2d7b2.trans
dec7ae8c-a586-48bf-a681-1eb310b2d7b2	NC_040075.1	65629373	65629434	peak_18675	62	+	NP_exon	dec7ae8c-a586-48bf-a681-1eb310b2d7b2.trans
dec7ae8c-a586-48bf-a681-1eb310b2d7b2	NC_040075.1	65630062	65630153	peak_18676	92	+	NP_exon	dec7ae8c-a586-48bf-a681-1eb310b2d7b2.trans
TXN	NC_040075.1	67922834	67922892	peak_18688	59	+	utr5	rna-XM_027446222.1
933ccf4e-ff0b-432b-905d-aaa34d51bee7	NC_040075.1	70860104	70860313	peak_18705	210	+	NP_exon	933ccf4e-ff0b-432b-905d-aaa34d51bee7.trans
933ccf4e-ff0b-432b-905d-aaa34d51bee7	NC_040075.1	70860117	70860324	peak_18706	208	+	NP_exon	933ccf4e-ff0b-432b-905d-aaa34d51bee7.trans
ADGRV1	NC_040075.1	74097901	74097962	peak_18720	62	+	cds	rna-XM_027447107.1
814cb1bb-b19c-4757-a7ac-053d7ced132c	NC_040075.1	76305193	76305344	peak_18722	152	+	NP_exon	814cb1bb-b19c-4757-a7ac-053d7ced132c.trans
CAST	NC_040075.1	76977680	76994819	peak_18723	17140	+	PR_intron	rna-XM_027447117.1
CAST	NC_040075.1	77012664	77014873	peak_18724	2210	+	PR_intron	rna-XM_027447117.1
ba250e24-7870-4b97-ab46-3dc14e8f2350	NC_040075.1	525082	525233	peak_18744	152	-	NP_exon	ba250e24-7870-4b97-ab46-3dc14e8f2350.trans
ba250e24-7870-4b97-ab46-3dc14e8f2350	NC_040075.1	525110	525231	peak_18745	122	-	NP_exon	ba250e24-7870-4b97-ab46-3dc14e8f2350.trans
PCP4	NC_040046.1	91309979	91363096	peak_1877	53118	-	PR_intron	rna-XM_027449087.1
PIK3C3	NC_040075.1	4986033	4986094	peak_18774	62	-	utr3	rna-XM_027446352.1
KCNJ15	NC_040046.1	91975819	91976178	peak_1881	360	-	cds	rna-XM_013093897.3
KCNJ15	NC_040046.1	91976326	91976565	peak_1882	240	-	cds	rna-XM_013093897.3
KCNJ15	NC_040046.1	91999019	92011782	peak_1883	12764	-	PR_intron	rna-XM_013093897.3
CZH5orf34	NC_040075.1	14279722	14279813	peak_18848	92	-	cds	rna-XM_027446954.1
ARL15	NC_040075.1	16677127	16677368	peak_18851	242	-	utr3	rna-XM_027447142.1
ANKRD55	NC_040075.1	17562618	17562738	peak_18859	121	-	cds	rna-XM_027446767.1
007c484b-f748-4645-81d2-63222f1bd579	NC_040075.1	18692409	18692800	peak_18867	392	-	NP_exon	007c484b-f748-4645-81d2-63222f1bd579.trans
007c484b-f748-4645-81d2-63222f1bd579	NC_040075.1	18692407	18692797	peak_18869	391	-	NP_exon	007c484b-f748-4645-81d2-63222f1bd579.trans
THBS4	NC_040075.1	22443825	22445496	peak_18879	1672	-	PR_intron	rna-XM_027446801.1
F2RL1	NC_040075.1	23841818	23842028	peak_18896	211	-	utr3	rna-XM_027447156.1
SV2C	NC_040075.1	24013738	24013889	peak_18901	152	-	utr3	rna-XM_027446670.1
SV2C	NC_040075.1	24013742	24013863	peak_18902	122	-	utr3	rna-XM_027446670.1
SV2C	NC_040075.1	24096758	24097148	peak_18903	391	-	cds	rna-XM_027446670.1
POLK	NC_040075.1	24315874	24316085	peak_18904	212	-	cds	rna-XM_027446888.1
POLK	NC_040075.1	24325698	24327503	peak_18905	1806	-	PR_intron	rna-XM_027446888.1
PGM5	NC_040075.1	25995081	25995142	peak_18918	62	-	utr5	rna-XM_027446247.1
ZDHHC21	NC_040075.1	31635187	31635247	peak_18937	61	-	utr3	rna-XM_027446271.1
PSIP1	NC_040075.1	31981987	31982078	peak_18942	92	-	utr5	rna-XM_027446093.1
12da60ba-52de-487e-9441-f94f71f302e7	NC_040075.1	32354194	32354315	peak_18945	122	-	NP_exon	12da60ba-52de-487e-9441-f94f71f302e7.trans
12da60ba-52de-487e-9441-f94f71f302e7	NC_040075.1	32354202	32354323	peak_18949	122	-	NP_exon	12da60ba-52de-487e-9441-f94f71f302e7.trans
PLIN2	NC_040075.1	33643897	33643957	peak_18954	61	-	cds	rna-NM_001310418.1
42355edd-3254-4090-b137-58f0aac24bed	NC_040075.1	34066060	34066359	peak_18956	300	-	NP_exon	42355edd-3254-4090-b137-58f0aac24bed.trans
MLLT3	NC_040075.1	34066066	34075567	peak_18957	9502	-	PR_intron	rna-XM_027446514.1
MLLT3	NC_040075.1	34104111	34115018	peak_18958	10908	-	PR_intron	rna-XM_027446514.1
PRUNE2	NC_040075.1	37292602	37292813	peak_18967	212	-	cds	rna-XM_027446317.1
PRUNE2	NC_040075.1	37295690	37295811	peak_18968	122	-	cds	rna-XM_027446317.1
PRUNE2	NC_040075.1	37297342	37297493	peak_18969	152	-	cds	rna-XM_027446317.1
LOC101793706	NC_040075.1	37628205	37646040	peak_18970	17836	-	PR_intron	rna-XM_027446489.1
ISCA1	NC_040075.1	40559710	40559919	peak_18983	210	-	utr3	rna-XM_027446502.1
LOC101802994	NC_040075.1	41158470	41158766	peak_18989	297	-	utr3	rna-XM_005017240.2
FANCC	NC_040075.1	41483550	41483610	peak_18990	61	-	utr5	rna-XM_027446840.1
2587607d-c4fa-446a-a23a-ed4b32c2afcf	NC_040075.1	44246748	44246988	peak_18999	241	-	NP_exon	2587607d-c4fa-446a-a23a-ed4b32c2afcf.trans
2587607d-c4fa-446a-a23a-ed4b32c2afcf	NC_040075.1	44246747	44247017	peak_19002	271	-	NP_exon	2587607d-c4fa-446a-a23a-ed4b32c2afcf.trans
da8aee8a-6531-41da-b575-e6e3c8f58080	NC_040075.1	45172768	45173157	peak_19015	390	-	NP_exon	da8aee8a-6531-41da-b575-e6e3c8f58080.trans
da8aee8a-6531-41da-b575-e6e3c8f58080	NC_040075.1	45173335	45173634	peak_19016	300	-	NP_exon	da8aee8a-6531-41da-b575-e6e3c8f58080.trans
da8aee8a-6531-41da-b575-e6e3c8f58080	NC_040075.1	45173842	45173992	peak_19017	151	-	NP_exon	da8aee8a-6531-41da-b575-e6e3c8f58080.trans
da8aee8a-6531-41da-b575-e6e3c8f58080	NC_040075.1	45174110	45174350	peak_19018	241	-	NP_exon	da8aee8a-6531-41da-b575-e6e3c8f58080.trans
da8aee8a-6531-41da-b575-e6e3c8f58080	NC_040075.1	45172774	45173164	peak_19019	391	-	NP_exon	da8aee8a-6531-41da-b575-e6e3c8f58080.trans
da8aee8a-6531-41da-b575-e6e3c8f58080	NC_040075.1	45173343	45173613	peak_19020	271	-	NP_exon	da8aee8a-6531-41da-b575-e6e3c8f58080.trans
da8aee8a-6531-41da-b575-e6e3c8f58080	NC_040075.1	45173852	45173943	peak_19021	92	-	NP_exon	da8aee8a-6531-41da-b575-e6e3c8f58080.trans
ROR2	NC_040075.1	45174121	45176116	peak_19022	1996	-	PR_intron	rna-XM_013104436.3
FUT10	NC_040075.1	49792679	49794627	peak_19049	1949	-	PR_intron	rna-XM_005019004.3
RNF38	NC_040075.1	51475204	51476964	peak_19064	1761	-	PR_intron	rna-XM_027446331.1
GIN1	NC_040075.1	53422930	53426141	peak_19077	3212	-	PR_intron	rna-XM_027446122.1
PRDM6	NC_040075.1	59863846	59863937	peak_19102	92	-	cds	rna-XM_027447078.1
LOC101789519	NC_040075.1	60257256	60265764	peak_19109	8509	-	PR_intron	rna-XM_005013111.4
LOC113840388	NC_040075.1	63174249	63174370	peak_19122	122	-	utr5	rna-XM_027447085.1
HEMGN	NC_040075.1	63638180	63641377	peak_19127	3198	-	PR_intron	rna-XM_013096968.2
LOC101804639	NC_040075.1	67389624	67389685	peak_19141	62	-	utr3	rna-XM_027446846.1
LOC101804639	NC_040075.1	67389600	67389691	peak_19142	92	-	utr3	rna-XM_027446846.1
3415ef16-2c6c-4da3-becb-6a9755cc664c	NC_040075.1	67988304	67988395	peak_19144	92	-	NP_exon	3415ef16-2c6c-4da3-becb-6a9755cc664c.trans
RASA1	NC_040075.1	74858196	74858256	peak_19176	61	-	cds	rna-XM_027446193.1
LOC113840528	NW_020865008.1	463	694	peak_19188	232	-	cds	rna-XM_027447277.1
LOC113840601	NW_020865067.1	15814	16251	peak_19191	438	-	PR_intron	id-LOC113840601
ae58ca66-a087-467d-ab5b-43307426c2b7	NW_020865082.1	9774	9955	peak_19192	182	+	NP_exon	ae58ca66-a087-467d-ab5b-43307426c2b7.trans
ae58ca66-a087-467d-ab5b-43307426c2b7	NW_020865082.1	9777	9958	peak_19193	182	+	NP_exon	ae58ca66-a087-467d-ab5b-43307426c2b7.trans
0acc33b8-3056-44e3-a555-fd6f9d74f37d	NW_020865126.1	3904	4113	peak_19194	210	+	NP_exon	0acc33b8-3056-44e3-a555-fd6f9d74f37d.trans
0acc33b8-3056-44e3-a555-fd6f9d74f37d	NW_020865126.1	3899	4140	peak_19195	242	+	NP_exon	0acc33b8-3056-44e3-a555-fd6f9d74f37d.trans
PPP1R16B	NW_020865161.1	2680	2860	peak_19197	181	-	utr3	rna-XM_027447389.1
PPP1R16B	NW_020865161.1	3365	4137	peak_19199	773	-	PR_intron	rna-XM_027447389.1
LOC101801038	NW_020865200.1	65726	65875	peak_19201	150	-	cds	rna-XM_027447433.1
LOC113840719	NW_020865212.1	10536	10657	peak_19208	122	-	cds	rna-XM_027447458.1
LOC113840727	NW_020865222.1	21867	23592	peak_19212	1726	+	PR_intron	rna-XM_027447470.1
LOC113840893	NW_020865389.1	198792	198939	peak_19220	148	-	NP_exon	gene-LOC113840893.trans
2d2edceb-793c-40cc-80b4-568dd01f7c17	NW_020865493.1	98390	98571	peak_19231	182	-	NP_exon	2d2edceb-793c-40cc-80b4-568dd01f7c17.trans
LOC113841031	NW_020865523.1	10163	10314	peak_19236	152	+	cds	rna-XM_027447760.1
LOC113841043	NW_020865532.1	10027	10088	peak_19238	62	+	cds	rna-XM_027447770.1
LOC113841145	NW_020865623.1	23120	23181	peak_19248	62	+	cds	rna-XM_027447862.1
LOC101793198	NW_020865671.1	113502	131871	peak_19252	18370	+	NP_intron	gene-LOC101793198.trans
LOC113841284	NW_020865749.1	8856	9428	peak_19257	573	+	NP_intron	gene-LOC113841284.trans
LOC113841298	NW_020865771.1	50972	51062	peak_19259	91	-	NP_exon	gene-LOC113841298.trans
N6AMT1	NC_040046.1	95674045	95674105	peak_1926	61	-	cds	rna-XM_013102972.3
LOC101798468	NW_020865850.1	55214	59747	peak_19264	4534	-	PR_intron	rna-XM_005027213.4
LOC101797198	NW_020865855.1	26066	26276	peak_19265	211	+	utr3	rna-XM_027448025.1
HUWE1	NW_020865929.1	3490	3669	peak_19272	180	-	cds	rna-XM_027448089.1
LOC113841463	NW_020865960.1	686	836	peak_19280	151	+	NP_exon	gene-LOC113841463.trans
LOC113841484	NW_020866009.1	603	865	peak_19285	263	+	cds	rna-XM_027448143.1
LOC101794767	NW_020866261.1	187043	187164	peak_19305	122	-	cds	rna-XM_027448280.1
8442ea39-1a0d-4215-afbc-f6d9d3417746	NW_020866353.1	40900	40961	peak_19315	62	+	NP_exon	8442ea39-1a0d-4215-afbc-f6d9d3417746.trans
019789a8-bae0-4776-9c31-7fd1e21d09b3	NW_020866461.1	4125	4305	peak_19318	181	+	NP_exon	019789a8-bae0-4776-9c31-7fd1e21d09b3.trans
019789a8-bae0-4776-9c31-7fd1e21d09b3	NW_020866461.1	4109	4285	peak_19319	177	+	NP_exon	019789a8-bae0-4776-9c31-7fd1e21d09b3.trans
LOC106019618	NW_020866461.1	26159	26731	peak_19321	573	+	PR_intron	rna-XM_027448448.1
LOC110352505	NW_020866535.1	1489	2671	peak_19330	1183	+	PR_intron	rna-XM_027448545.1
LOC113841869	NW_020866557.1	12903	13225	peak_19332	323	+	utr5	rna-XM_027448573.1
37d19280-8aba-4a80-b939-8169dc1e9615	NW_020866566.1	31834	32075	peak_19333	242	-	NP_exon	37d19280-8aba-4a80-b939-8169dc1e9615.trans
37d19280-8aba-4a80-b939-8169dc1e9615	NW_020866566.1	31833	32101	peak_19334	269	-	NP_exon	37d19280-8aba-4a80-b939-8169dc1e9615.trans
LOC101797923	NW_020866626.1	76336	76396	peak_19337	61	+	NP_exon	rna-XR_003494301.1
bb37c617-9fbc-4d71-8f31-304ff56a12bd	NW_020866717.1	59470	59529	peak_19345	60	-	NP_exon	bb37c617-9fbc-4d71-8f31-304ff56a12bd.trans
bb37c617-9fbc-4d71-8f31-304ff56a12bd	NW_020866717.1	59455	59545	peak_19346	91	-	NP_exon	bb37c617-9fbc-4d71-8f31-304ff56a12bd.trans
LOC101804119	NW_020866776.1	21299	21449	peak_19358	151	+	NP_exon	gene-LOC101804119.trans
LOC113842211	NW_020866965.1	24723	27314	peak_19374	2592	+	NP_intron	gene-LOC113842211.trans
LOC113842211	NW_020866965.1	48441	48832	peak_19375	392	+	NP_exon	gene-LOC113842211.trans
LOC101791479	NW_020867025.1	10684	10775	peak_19393	92	+	utr3	rna-XM_027448967.1
CD80	NC_040046.1	107551882	107551943	peak_1949	62	-	utr3	rna-XM_005017637.3
LOC101800605	NC_040046.1	111198882	111199210	peak_1977	329	-	utr3	rna-XM_027449441.1
PLCXD2	NC_040046.1	111483611	111483672	peak_1985	62	-	cds	rna-XM_027449452.1
SLC19A2	NC_040046.1	116037039	116040520	peak_2021	3482	-	PR_intron	rna-XM_027449567.1
DRD3	NC_040046.1	116624267	116624386	peak_2033	120	-	utr3	rna-XM_027449611.1
NHLRC3	NC_040046.1	25731215	25732859	peak_205	1645	+	PR_intron	rna-XM_027465160.1
f7079ffb-c018-42ea-bb4e-a8094a43ec7b	NC_040046.1	119310434	119310911	peak_2054	478	-	NP_exon	f7079ffb-c018-42ea-bb4e-a8094a43ec7b.trans
ATP7B	NC_040046.1	26604987	26605048	peak_211	62	+	cds	rna-XM_013095105.2
LPAR5	NC_040046.1	121616388	121616539	peak_2110	152	-	utr3	rna-XM_005016748.3
LPAR5	NC_040046.1	121625913	121625973	peak_2111	61	-	PR_intron	rna-XM_027449754.1
LPAR5	NC_040046.1	121626032	121626093	peak_2112	62	-	PR_intron	rna-XM_027449754.1
MLF2	NC_040046.1	121738673	121739203	peak_2122	531	-	NP_intron	rna-XR_003494929.1
TMEM139	NC_040046.1	122323596	122323806	peak_2135	211	-	utr3	rna-XM_021270173.2
LOC101804544	NC_040046.1	124381195	124381914	peak_2166	720	-	PR_intron	rna-XM_005012660.4
VWF	NC_040046.1	125768210	125768271	peak_2172	62	-	cds	rna-XM_027449924.1
LMNTD1	NC_040046.1	128210736	128321487	peak_2190	110752	-	PR_intron	rna-XM_027450010.1
ITPR2	NC_040046.1	128576031	128576181	peak_2193	151	-	utr3	rna-XM_013102889.2
ITPR2	NC_040046.1	128576480	128576601	peak_2194	122	-	utr3	rna-XM_013102889.2
ARFGAP3	NC_040046.1	129376325	129379920	peak_2202	3596	-	PR_intron	rna-XM_027450044.1
TTLL12	NC_040046.1	129574874	129580572	peak_2208	5699	-	PR_intron	rna-XM_027450046.1
SHISAL1	NC_040046.1	130379909	130380000	peak_2212	92	-	utr3	rna-XM_027450087.1
WNT7B	NC_040046.1	132014896	132014957	peak_2217	62	-	utr3	rna-XM_005010029.4
WNT7B	NC_040046.1	132015465	132015675	peak_2218	211	-	cds	rna-XM_005010029.4
WNT7B	NC_040046.1	132015854	132015914	peak_2219	61	-	cds	rna-XM_005010029.4
WNT7B	NC_040046.1	132104132	132110055	peak_2220	5924	-	PR_intron	rna-XM_005010029.4
PTPRO	NC_040046.1	137213428	137213518	peak_2244	91	-	utr3	rna-XM_027461872.1
PTPRO	NC_040046.1	137213726	137213937	peak_2245	212	-	utr3	rna-XM_027461872.1
SUCLA2	NC_040046.1	28237002	28237062	peak_229	61	+	cds	rna-XM_027471679.1
SYT10	NC_040046.1	141535811	141541492	peak_2314	5682	-	PR_intron	rna-XM_027443617.1
FAM180A	NC_040046.1	141836607	141836698	peak_2315	92	-	utr3	rna-XM_005020185.4
FAM180A	NC_040046.1	141861879	141861940	peak_2316	62	-	utr5	rna-XM_005020185.4
DGKI	NC_040046.1	142613038	142613158	peak_2320	121	-	utr3	rna-XM_027445394.1
IGF1	NC_040046.1	144933884	144933975	peak_2338	92	-	utr3	rna-XM_005022553.4
TXN2	NC_040046.1	148628806	148628896	peak_2370	91	-	utr3	rna-XM_027450093.1
LOC113843330	NC_040046.1	149228718	149228867	peak_2385	150	-	cds	rna-XM_027455258.1
C1H22orf23	NC_040046.1	149269642	149269702	peak_2387	61	-	utr3	rna-XM_027455268.1
ADSL	NC_040046.1	150197808	150197929	peak_2407	122	-	PR_intron	rna-NM_001310389.1
PPFIA2	NC_040046.1	150682782	150683804	peak_2415	1023	-	PR_intron	rna-XM_027451314.1
PPFIA2	NC_040046.1	150691471	150693398	peak_2416	1928	-	PR_intron	rna-XM_027451264.1
PPFIA2	NC_040046.1	150695360	150695510	peak_2417	151	-	cds	rna-XM_027451264.1
SLC6A15	NC_040046.1	152262307	152262578	peak_2419	272	-	cds	rna-XM_005018371.4
C1H12orf50	NC_040046.1	153567448	153568195	peak_2423	748	-	PR_intron	rna-XM_013104658.3
KERA	NC_040046.1	154842604	154842694	peak_2444	91	-	cds	rna-XM_021267423.2
DCN	NC_040046.1	154891930	154892020	peak_2446	91	-	utr3	rna-XM_005012380.4
VWA8	NC_040046.1	30808246	30808337	peak_245	92	+	utr3	rna-XM_027472326.1
30b8f65a-0491-451c-8bd5-e23c8248f3d7	NC_040046.1	157726712	157726803	peak_2476	92	-	NP_exon	30b8f65a-0491-451c-8bd5-e23c8248f3d7.trans
30b8f65a-0491-451c-8bd5-e23c8248f3d7	NC_040046.1	157726712	157726803	peak_2477	92	-	NP_exon	30b8f65a-0491-451c-8bd5-e23c8248f3d7.trans
LOC101794184	NC_040046.1	159265213	159265362	peak_2483	150	-	cds	rna-XM_005012151.4
LOC101798542	NC_040046.1	159268009	159268126	peak_2484	118	-	cds	rna-XM_005012175.4
SYT1	NC_040046.1	161985676	162063748	peak_2499	78073	-	PR_intron	rna-XM_027455350.1
LOC106020629	NC_040046.1	163443352	163443412	peak_2503	61	-	utr3	rna-XM_027455046.1
USP15	NC_040046.1	168433679	168433800	peak_2556	122	-	cds	rna-XM_027456500.1
TMEM117	NC_040046.1	171146916	171146977	peak_2565	62	-	cds	rna-XM_005009953.4
IRAK4	NC_040046.1	171395704	171395795	peak_2566	92	-	utr3	rna-XM_027456937.1
THAP5	NC_040046.1	173098266	173099805	peak_2583	1540	-	PR_intron	rna-XM_027457290.1
PIBF1	NC_040046.1	41198146	41198206	peak_265	61	+	cds	rna-XM_027472973.1
FAM185A	NC_040046.1	190154331	190154451	peak_2670	121	-	utr3	rna-XM_027459614.1
CACNA2D1	NC_040046.1	192966645	192966766	peak_2679	122	-	utr5	rna-XM_027459930.1
PCLO	NC_040046.1	193147944	193148005	peak_2680	62	-	utr3	rna-XM_027459963.1
PCLO	NC_040046.1	193329654	193329835	peak_2682	182	-	cds	rna-XM_027459963.1
SEMA3E	NC_040046.1	193599976	193600127	peak_2683	152	-	cds	rna-XM_021269473.2
SEMA3E	NC_040046.1	193750255	193750525	peak_2684	271	-	utr5	rna-XM_021269473.2
SEC61A2	NC_040046.1	196642719	196642809	peak_2705	91	-	utr3	rna-XM_027460571.1
LOC101804347	NC_040046.1	200547582	200547672	peak_2725	91	-	cds	rna-XM_021279581.2
SLAIN1	NC_040046.1	43269400	43278238	peak_275	8839	+	PR_intron	rna-XM_027442878.1
LOC113842963	NC_040047.1	313264	313505	peak_2761	242	+	cds	rna-XM_027452864.1
SLITRK5	NC_040046.1	48561079	48561170	peak_277	92	+	cds	rna-XM_027443078.1
SLITRK5	NC_040046.1	48561079	48561169	peak_278	91	+	cds	rna-XM_027443078.1
KIF9	NC_040047.1	849479	851863	peak_2789	2385	+	PR_intron	rna-XM_027450289.1
KIF9	NC_040047.1	862198	862459	peak_2790	262	+	PR_intron	rna-XM_027450289.1
WNT3A	NC_040047.1	2303809	2303959	peak_2800	151	+	utr3	rna-XM_027452872.1
WNT3A	NC_040047.1	2305215	2305485	peak_2801	271	+	utr3	rna-XM_027452872.1
HIGD1A	NC_040047.1	2701990	2702081	peak_2829	92	+	utr3	rna-XM_027450317.1
d9dc55ca-e03b-4115-bd84-a5fe7ddccf3a	NC_040047.1	4834466	4834913	peak_2844	448	+	NP_exon	d9dc55ca-e03b-4115-bd84-a5fe7ddccf3a.trans
d9dc55ca-e03b-4115-bd84-a5fe7ddccf3a	NC_040047.1	4834448	4834920	peak_2845	473	+	NP_exon	d9dc55ca-e03b-4115-bd84-a5fe7ddccf3a.trans
GORASP1	NC_040047.1	5277127	5277366	peak_2852	240	+	cds	rna-XM_027450378.1
71f230f6-1955-42cf-b5e3-89b5831cea18	NC_040047.1	8825933	8825994	peak_2867	62	+	NP_exon	71f230f6-1955-42cf-b5e3-89b5831cea18.trans
71f230f6-1955-42cf-b5e3-89b5831cea18	NC_040047.1	8825909	8826029	peak_2868	121	+	NP_exon	71f230f6-1955-42cf-b5e3-89b5831cea18.trans
WDR37	NC_040047.1	10835965	10840459	peak_2881	4495	+	PR_intron	rna-XM_027450466.1
WDR37	NC_040047.1	10875668	10875848	peak_2882	181	+	utr3	rna-XM_021269584.2
MAP3K8	NC_040047.1	15844225	15845321	peak_2915	1097	+	PR_intron	rna-XM_027450563.1
MPP7	NC_040047.1	16392907	16395871	peak_2918	2965	+	PR_intron	rna-XM_027450579.1
MASTL	NC_040047.1	16824005	16824215	peak_2920	211	+	cds	rna-XM_027450590.1
ZNF804B	NC_040047.1	22488396	22488637	peak_2946	242	+	utr5	rna-XM_027450746.1
ZNF804B	NC_040047.1	22724813	22724874	peak_2947	62	+	cds	rna-XM_027450746.1
ITGBL1	NC_040046.1	55002513	55009970	peak_295	7458	+	PR_intron	rna-XM_005014884.4
CDK14	NC_040047.1	23534252	23534492	peak_2953	241	+	utr3	rna-XM_013097937.3
CDK14	NC_040047.1	23537150	23537211	peak_2954	62	+	utr3	rna-XM_013097937.3
CHN2	NC_040047.1	36141166	36141316	peak_3023	151	+	cds	rna-XM_027450984.1
GALNT15	NC_040047.1	36696985	36697046	peak_3028	62	+	PR_intron	rna-XM_027451006.1
GALNT15	NC_040047.1	36721667	36722838	peak_3029	1172	+	PR_intron	rna-XM_027451010.1
NOD1	NC_040047.1	43686275	43686425	peak_3060	151	+	cds	rna-XM_027450097.1
NOD1	NC_040047.1	43700199	43700259	peak_3061	61	+	cds	rna-XM_027450097.1
04edbd91-3060-4bd4-bb5a-e62ac9be6a2b	NC_040047.1	43934710	43934887	peak_3065	178	+	NP_exon	04edbd91-3060-4bd4-bb5a-e62ac9be6a2b.trans
NEK11	NC_040047.1	44326615	44326856	peak_3067	242	+	utr3	rna-XM_027451142.1
LOC101804833	NC_040047.1	44743437	44743587	peak_3068	151	+	NP_exon	rna-XR_003495044.1
LOC101804833	NC_040047.1	44744871	44745021	peak_3069	151	+	NP_exon	rna-XR_003495044.1
TMEM158	NC_040047.1	45610870	45611080	peak_3091	211	+	cds	rna-XM_027451148.1
SIRT5	NC_040047.1	51145067	51145156	peak_3124	90	+	utr3	rna-XM_021275211.2
TPK1	NC_040047.1	56341788	56341938	peak_3151	151	+	utr3	rna-XM_027451311.1
AMPH	NC_040047.1	59180666	59234645	peak_3175	53980	+	PR_intron	rna-XM_005014958.4
EPDR1	NC_040047.1	62515711	62515891	peak_3198	181	+	cds	rna-XM_027451457.1
TFAP2A	NC_040047.1	66644080	66644199	peak_3213	120	+	utr5	rna-XM_027450133.1
TFAP2A	NC_040047.1	66644553	66648714	peak_3214	4162	+	PR_intron	rna-XM_027450133.1
TFAP2A	NC_040047.1	66657892	66658159	peak_3215	268	+	cds	rna-XM_027450133.1
LOC101799158	NC_040047.1	67055415	67055506	peak_3216	92	+	cds	rna-XM_021278173.2
NRN1	NC_040047.1	68490597	68490657	peak_3225	61	+	utr3	rna-XM_027451610.1
LOC101799119	NC_040047.1	78094137	78094228	peak_3249	92	+	utr3	rna-XM_005022849.4
LOC106018098	NC_040047.1	78122279	78124111	peak_3250	1833	+	PR_intron	rna-XM_027451689.1
CDC16	NC_040046.1	61711769	61711919	peak_326	151	+	cds	rna-XM_027444728.1
GABBR2	NC_040047.1	92817228	92817647	peak_3282	420	+	utr3	rna-XM_027451831.1
GABBR2	NC_040047.1	92818184	92818394	peak_3283	211	+	utr3	rna-XM_027451831.1
CTNNAL1	NC_040047.1	92986541	92992248	peak_3284	5708	+	PR_intron	rna-XM_027450210.1
EDAR	NC_040046.1	62177603	62177813	peak_333	211	+	cds	rna-XM_021277640.2
ANKRD29	NC_040047.1	102226460	102226521	peak_3331	62	+	cds	rna-XM_027451937.1
NPC1	NC_040047.1	102263381	102263592	peak_3332	212	+	utr3	rna-XM_027451939.1
891e1d16-cf65-49b3-a5a4-451ab3ae1df8	NC_040047.1	102904372	102904551	peak_3334	180	+	NP_exon	891e1d16-cf65-49b3-a5a4-451ab3ae1df8.trans
891e1d16-cf65-49b3-a5a4-451ab3ae1df8	NC_040047.1	102904371	102904551	peak_3335	181	+	NP_exon	891e1d16-cf65-49b3-a5a4-451ab3ae1df8.trans
SMCHD1	NC_040047.1	104170194	104170315	peak_3346	122	+	cds	rna-XM_027450217.1
NDUFV2	NC_040047.1	106750689	106750779	peak_3364	91	+	utr3	rna-XM_027452048.1
CREG2	NC_040046.1	65092905	65093056	peak_339	152	+	PR_intron	rna-XM_027445925.1
CREG2	NC_040046.1	65098310	65098641	peak_340	332	+	PR_intron	rna-XM_027445925.1
LOC101801046	NC_040047.1	112811152	112811392	peak_3405	241	+	utr5	rna-XM_027452184.1
LOC101801046	NC_040047.1	112832415	112833160	peak_3406	746	+	PR_intron	rna-XM_027452183.1
5b381d08-4cb7-4ed1-8d3e-442892b33e8b	NC_040047.1	120106228	120106319	peak_3450	92	+	NP_exon	5b381d08-4cb7-4ed1-8d3e-442892b33e8b.trans
5b381d08-4cb7-4ed1-8d3e-442892b33e8b	NC_040047.1	120106228	120106319	peak_3451	92	+	NP_exon	5b381d08-4cb7-4ed1-8d3e-442892b33e8b.trans
LOC113842551	NC_040047.1	120108595	120108714	peak_3452	120	+	utr3	rna-XM_027450223.1
SGK3	NC_040047.1	120983173	120985971	peak_3463	2799	+	PR_intron	rna-XM_027452310.1
C2H8orf34	NC_040047.1	121655429	121659477	peak_3471	4049	+	PR_intron	rna-XM_027452320.1
STMN2	NC_040047.1	126688106	126691792	peak_3501	3687	+	PR_intron	rna-XM_005016023.4
RALYL	NC_040047.1	128724805	128724896	peak_3508	92	+	utr3	rna-XM_027452416.1
LOC101800982	NC_040047.1	130510508	130510748	peak_3519	241	+	utr3	rna-XM_021278685.2
LOC101800982	NC_040047.1	130511851	130511971	peak_3520	121	+	utr3	rna-XM_021278685.2
LOC101800982	NC_040047.1	130510536	130510746	peak_3521	211	+	utr3	rna-XM_021278685.2
LOC101800982	NC_040047.1	130511880	130511971	peak_3522	92	+	utr3	rna-XM_021278685.2
GRHL2	NC_040047.1	135107684	135119206	peak_3556	11523	+	PR_intron	rna-XM_027452540.1
GRHL2	NC_040047.1	135123905	135124175	peak_3557	271	+	cds	rna-XM_027452540.1
GRHL2	NC_040047.1	135144948	135150109	peak_3558	5162	+	PR_intron	rna-XM_027452540.1
GRHL2	NC_040047.1	135150342	135163370	peak_3559	13029	+	PR_intron	rna-XM_027452540.1
BAALC	NC_040047.1	135586141	135589468	peak_3560	3328	+	PR_intron	rna-XM_027452564.1
DCAF13	NC_040047.1	135672570	135674130	peak_3563	1561	+	PR_intron	rna-XM_027452568.1
RIMS2	NC_040047.1	135840288	135840469	peak_3564	182	+	cds	rna-XM_021277634.2
RIMS2	NC_040047.1	136096253	136096373	peak_3565	121	+	utr3	rna-XM_021277634.2
VWA3B	NC_040046.1	66637191	66641699	peak_358	4509	+	PR_intron	rna-XM_027446678.1
99f26111-8c0a-4061-8899-d1a2dde2d2f9	NC_040047.1	144778273	144778483	peak_3588	211	+	NP_exon	99f26111-8c0a-4061-8899-d1a2dde2d2f9.trans
99f26111-8c0a-4061-8899-d1a2dde2d2f9	NC_040047.1	144778271	144778481	peak_3589	211	+	NP_exon	99f26111-8c0a-4061-8899-d1a2dde2d2f9.trans
CNGA3	NC_040046.1	66670817	66670907	peak_359	91	+	utr5	rna-XM_027446687.1
99f26111-8c0a-4061-8899-d1a2dde2d2f9	NC_040047.1	144779315	144779376	peak_3590	62	+	NP_exon	99f26111-8c0a-4061-8899-d1a2dde2d2f9.trans
af5fc9e1-d188-4063-99f1-d07a01f0ecbe	NC_040046.1	66704408	66704469	peak_360	62	+	NP_exon	af5fc9e1-d188-4063-99f1-d07a01f0ecbe.trans
GABRA5	NC_040046.1	67415368	67415548	peak_361	181	+	cds	rna-XM_027446805.1
PSCA	NC_040047.1	154424693	154426326	peak_3612	1634	+	PR_intron	rna-XM_005016052.4
e5fcd5a2-babb-4798-aec8-1c5ae3aa6f2f	NC_040047.1	387532	388132	peak_3634	601	-	NP_exon	e5fcd5a2-babb-4798-aec8-1c5ae3aa6f2f.trans
e5fcd5a2-babb-4798-aec8-1c5ae3aa6f2f	NC_040047.1	387532	388131	peak_3636	600	-	NP_exon	e5fcd5a2-babb-4798-aec8-1c5ae3aa6f2f.trans
LOC113840282	NC_040046.1	68307152	68307362	peak_364	211	+	utr5	rna-XM_027446918.1
LOC113842971	NC_040047.1	803915	804093	peak_3644	179	-	utr3	rna-XM_027452934.1
LOC113842971	NC_040047.1	804534	804711	peak_3645	178	-	cds	rna-XM_027452934.1
ADCYAP1R1	NC_040047.1	3508771	3508831	peak_3667	61	-	utr5	rna-XM_027450337.1
MINDY4	NC_040047.1	3876046	3876197	peak_3670	152	-	utr3	rna-XM_027450343.1
SHH	NC_040047.1	8344684	8344924	peak_3711	241	-	cds	rna-XM_027452881.1
SHH	NC_040047.1	8352140	8352470	peak_3712	331	-	cds	rna-XM_027452881.1
ADARB2	NC_040047.1	11004375	11004525	peak_3729	151	-	cds	rna-XM_021269585.2
ADARB2	NC_040047.1	11013472	11213817	peak_3730	200346	-	PR_intron	rna-XM_027450468.1
GPR158	NC_040047.1	17398684	17398954	peak_3767	271	-	cds	rna-XM_027450618.1
GPR158	NC_040047.1	17399073	17399134	peak_3768	62	-	cds	rna-XM_027450618.1
GPR158	NC_040047.1	17399971	17400061	peak_3769	91	-	cds	rna-XM_027450618.1
ABCB1	NC_040047.1	21988345	21988940	peak_3799	596	-	PR_intron	rna-XM_027450722.1
LOC101791330	NC_040047.1	23972567	23972776	peak_3801	210	-	cds	rna-XM_027450770.1
DLX5	NC_040047.1	26121902	26122023	peak_3819	122	-	cds	rna-XM_027450833.1
DLX5	NC_040047.1	26123517	26123638	peak_3820	122	-	utr5	rna-XM_027450833.1
ASNS	NC_040047.1	26371763	26371914	peak_3821	152	-	utr3	rna-XM_027450841.1
ETV1	NC_040047.1	29318114	29321581	peak_3826	3468	-	PR_intron	rna-XM_027450876.1
ISPD	NC_040047.1	30496235	30496889	peak_3828	655	-	PR_intron	rna-XM_027450889.1
SOSTDC1	NC_040047.1	30510900	30511439	peak_3829	540	-	cds	rna-XM_027450890.1
AGR2	NC_040047.1	30713854	30713913	peak_3832	60	-	utr5	rna-XM_005015135.3
TMEM196	NC_040047.1	32043733	32043943	peak_3840	211	-	PR_intron	rna-XM_027450910.1
MACC1	NC_040047.1	32172773	32172833	peak_3841	61	-	cds	rna-XM_005020511.4
MACC1	NC_040047.1	32180332	32180482	peak_3842	151	-	cds	rna-XM_005020511.4
GSDME	NC_040047.1	33927137	33932601	peak_3852	5465	-	PR_intron	rna-XM_027450951.1
JAZF1	NC_040047.1	35378145	35378385	peak_3883	241	-	utr3	rna-XM_027450981.1
0e8ccec0-02d2-4a5f-8d24-be8a298e0e4b	NC_040047.1	39793670	39793850	peak_3913	181	-	NP_exon	0e8ccec0-02d2-4a5f-8d24-be8a298e0e4b.trans
0e8ccec0-02d2-4a5f-8d24-be8a298e0e4b	NC_040047.1	39793673	39793794	peak_3914	122	-	NP_exon	0e8ccec0-02d2-4a5f-8d24-be8a298e0e4b.trans
TRIM71	NC_040047.1	43137106	43137167	peak_3928	62	-	cds	rna-XM_027451106.1
GASK1A	NC_040047.1	43605244	43606063	peak_3933	820	-	PR_intron	rna-XM_027451127.1
GASK1A	NC_040047.1	43609388	43609688	peak_3934	301	-	utr3	rna-XM_027451127.1
GASK1A	NC_040047.1	43619267	43619448	peak_3935	182	-	utr5	rna-XM_027451127.1
SACM1L	NC_040047.1	45380529	45380620	peak_3954	92	-	utr3	rna-XM_027450151.1
SACM1L	NC_040047.1	45401110	45407382	peak_3955	6273	-	PR_intron	rna-XM_027450151.1
c4096d48-d1ad-442f-ab30-40df5067abae	NC_040047.1	45442341	45442461	peak_3958	121	-	NP_exon	c4096d48-d1ad-442f-ab30-40df5067abae.trans
c4096d48-d1ad-442f-ab30-40df5067abae	NC_040047.1	45442878	45443087	peak_3959	210	-	NP_exon	c4096d48-d1ad-442f-ab30-40df5067abae.trans
c4096d48-d1ad-442f-ab30-40df5067abae	NC_040047.1	45442343	45442464	peak_3960	122	-	NP_exon	c4096d48-d1ad-442f-ab30-40df5067abae.trans
c4096d48-d1ad-442f-ab30-40df5067abae	NC_040047.1	45442881	45443091	peak_3961	211	-	NP_exon	c4096d48-d1ad-442f-ab30-40df5067abae.trans
c4096d48-d1ad-442f-ab30-40df5067abae	NC_040047.1	45445093	45445183	peak_3962	91	-	NP_exon	c4096d48-d1ad-442f-ab30-40df5067abae.trans
NRSN1	NC_040047.1	48579800	48581752	peak_3985	1953	-	PR_intron	rna-XM_027451210.1
RNF144B	NC_040047.1	50908732	50908883	peak_3989	152	-	PR_intron	rna-XM_027451228.1
RNF182	NC_040047.1	51262727	51262848	peak_3991	122	-	cds	rna-XM_027451250.1
IGFBP1	NC_040047.1	53474140	53474230	peak_4000	91	-	cds	rna-XM_027451291.1
VOPP1	NC_040047.1	56715255	56715434	peak_4007	180	-	utr3	rna-XM_027451318.1
VOPP1	NC_040047.1	56715847	56716026	peak_4008	180	-	utr3	rna-XM_027451318.1
POU6F2	NC_040047.1	58702219	58702400	peak_4021	182	-	PR_intron	rna-XM_021269147.2
PDCD6IP	NC_040047.1	66225107	66225168	peak_4063	62	-	cds	rna-XM_027451570.1
TMEM170B	NC_040047.1	66288220	66288281	peak_4064	62	-	NP_exon	rna-XR_003495409.1
BMP6	NC_040047.1	67793876	67793996	peak_4066	121	-	utr3	rna-XM_027451601.1
LOC101799383	NC_040047.1	71183034	71183184	peak_4088	151	-	cds	rna-XM_027451639.1
CDH9	NC_040047.1	74674088	74674209	peak_4091	122	-	utr5	rna-XM_027451655.1
LOC106017580	NC_040047.1	77803211	77803331	peak_4097	121	-	cds	rna-XM_027451675.1
TMSB4X	NC_040046.1	75955880	75956944	peak_410	1065	+	PR_intron	rna-XM_027447721.1
SERPINB5	NC_040047.1	78037271	78037451	peak_4104	181	-	utr3	rna-XM_027451685.1
44b376b5-d44b-4c2c-afc1-ed795043c996	NC_040046.1	75957087	75957232	peak_411	146	+	NP_exon	44b376b5-d44b-4c2c-afc1-ed795043c996.trans
FOXF2	NC_040047.1	78877065	78877184	peak_4110	120	-	cds	rna-XM_027451692.1
44b376b5-d44b-4c2c-afc1-ed795043c996	NC_040046.1	75956971	75957232	peak_412	262	+	NP_exon	44b376b5-d44b-4c2c-afc1-ed795043c996.trans
C2H18orf21	NC_040047.1	87765178	87765238	peak_4133	61	-	PR_intron	rna-XM_027451790.1
FRRS1L	NC_040047.1	88543362	88543483	peak_4135	122	-	NP_exon	rna-XR_003495539.1
CLPTM1L	NC_040047.1	90028815	90028936	peak_4144	122	-	utr3	rna-XM_027451821.1
LPCAT1	NC_040047.1	90064887	90065097	peak_4145	211	-	utr3	rna-XM_027450208.1
IRX2	NC_040047.1	90925058	90925328	peak_4147	271	-	cds	rna-XM_027451828.1
IRX2	NC_040047.1	90925446	90926293	peak_4148	848	-	PR_intron	rna-XM_027451828.1
IRX2	NC_040047.1	90928562	90928832	peak_4149	271	-	cds	rna-XM_027451828.1
SEC61B	NC_040047.1	94171939	94171999	peak_4170	61	-	utr5	rna-XM_027451864.1
TTC39C	NC_040047.1	102041415	102044436	peak_4210	3022	-	PR_intron	rna-XM_013095158.3
METTL4	NC_040047.1	104139509	104142136	peak_4229	2628	-	PR_intron	rna-XM_027451989.1
DLGAP1	NC_040047.1	104569324	104569474	peak_4237	151	-	cds	rna-XM_021268884.2
APCDD1	NC_040047.1	107085258	107085408	peak_4245	151	-	cds	rna-XM_027452059.1
SNTG1	NC_040047.1	109495460	109495521	peak_4260	62	-	utr3	rna-XM_027452100.1
LOC101799153	NC_040047.1	112689717	112689927	peak_4280	211	-	cds	rna-XM_005009493.4
LOC101799153	NC_040047.1	112689731	112692815	peak_4281	3085	-	PR_intron	rna-XM_005009493.4
TAF4B	NC_040047.1	114665597	114672637	peak_4282	7041	-	PR_intron	rna-XM_027452205.1
TAF4B	NC_040047.1	114678088	114684073	peak_4283	5986	-	PR_intron	rna-XM_027452206.1
PENK	NC_040047.1	116951027	116951415	peak_4293	389	-	cds	rna-XM_027452261.1
PENK	NC_040047.1	116954745	116954935	peak_4294	191	-	PR_intron	rna-XM_027452261.1
TOX	NC_040047.1	117784552	117784821	peak_4298	270	-	cds	rna-XM_005012134.4
RMDN1	NC_040047.1	129284231	129285047	peak_4343	817	-	PR_intron	rna-XM_027452437.1
RGS22	NC_040047.1	134631243	134633451	peak_4381	2209	-	PR_intron	rna-XM_013106453.3
TMEM74	NC_040047.1	138172347	138172676	peak_4405	330	-	cds	rna-XM_027452607.1
NUDCD1	NC_040047.1	138364090	138370149	peak_4406	6060	-	PR_intron	rna-XM_027452610.1
TNFRSF11B	NC_040047.1	142597675	142597886	peak_4428	212	-	cds	rna-XM_005017709.4
7cfef49c-b7a6-4ae4-94a1-cd41a48c861a	NC_040047.1	147184821	147184880	peak_4456	60	-	NP_exon	7cfef49c-b7a6-4ae4-94a1-cd41a48c861a.trans
7cfef49c-b7a6-4ae4-94a1-cd41a48c861a	NC_040047.1	147184806	147184867	peak_4457	62	-	NP_exon	7cfef49c-b7a6-4ae4-94a1-cd41a48c861a.trans
KCNQ3	NC_040047.1	147955972	147956033	peak_4458	62	-	cds	rna-XM_027452719.1
LRRC6	NC_040047.1	148017561	148017710	peak_4459	150	-	cds	rna-XM_027452723.1
FAM83H	NC_040047.1	155337645	155337706	peak_4503	62	-	cds	rna-XM_005026032.4
FAM83H	NC_040047.1	155344430	155352680	peak_4504	8251	-	PR_intron	rna-XM_005026033.4
EPPK1	NC_040047.1	155611918	155612069	peak_4511	152	-	cds	rna-XM_027450263.1
EPPK1	NC_040047.1	155612937	155613028	peak_4512	92	-	cds	rna-XM_027450263.1
SUSD4	NC_040048.1	2076358	2076418	peak_4544	61	+	utr3	rna-XM_027453076.1
ASB3	NC_040048.1	5267796	5268065	peak_4566	270	+	PR_intron	rna-XM_005018874.4
FANCL	NC_040048.1	6761667	6765206	peak_4587	3540	+	PR_intron	rna-XM_027453268.1
TASP1	NC_040048.1	11386199	11391842	peak_4620	5644	+	PR_intron	rna-XM_027453338.1
SRSF7	NC_040048.1	15756285	15756345	peak_4663	61	+	utr5	rna-XM_027453480.1
ABHD12	NC_040048.1	16413864	16414045	peak_4678	182	+	PR_intron	rna-XM_013103127.2
NRXN1	NC_040048.1	18249051	18483303	peak_4694	234253	+	PR_intron	rna-XM_021267225.2
NRXN1	NC_040048.1	18671865	18672166	peak_4695	302	+	PR_intron	rna-XM_021267227.2
NRXN1	NC_040048.1	18948718	18948869	peak_4696	152	+	utr3	rna-XM_027453585.1
LOC101803098	NC_040048.1	19412274	19412335	peak_4697	62	+	cds	rna-XM_027453601.1
KCNK12	NC_040048.1	19790092	19790183	peak_4700	92	+	cds	rna-XM_027453616.1
KCNK12	NC_040048.1	19790361	19790422	peak_4701	62	+	cds	rna-XM_027453616.1
EFHC2	NC_040046.1	81625608	81625815	peak_471	208	+	cds	rna-XM_027448988.1
NDP	NC_040046.1	81757887	81758097	peak_472	211	+	cds	rna-XM_013092971.3
LIN9	NC_040048.1	21259852	21271941	peak_4721	12090	+	PR_intron	rna-XM_027453688.1
NDP	NC_040046.1	81765238	81765478	peak_473	241	+	utr3	rna-XM_021267496.2
PROX1	NC_040048.1	22062716	22062777	peak_4738	62	+	cds	rna-XM_027453719.1
LOC101792808	NC_040046.1	81789367	81809946	peak_474	20580	+	PR_intron	rna-XM_027448994.1
LOC101792808	NC_040046.1	81835595	81836867	peak_475	1273	+	PR_intron	rna-XM_027448994.1
TBCE	NC_040048.1	24390544	24400281	peak_4757	9738	+	PR_intron	rna-XM_027453754.1
LOC101792808	NC_040046.1	81839143	81839293	peak_476	151	+	utr3	rna-XM_027448994.1
MTR	NC_040048.1	24950042	24950817	peak_4766	776	+	PR_intron	rna-XM_027453767.1
RYR2	NC_040048.1	25384488	25384609	peak_4767	122	+	cds	rna-XM_027453782.1
RYR2	NC_040048.1	25405438	25405589	peak_4768	152	+	utr3	rna-XM_027453782.1
KIF26B	NC_040048.1	28423070	28423190	peak_4780	121	+	cds	rna-XM_027453855.1
KIF26B	NC_040048.1	28441638	28442028	peak_4781	391	+	utr3	rna-XM_027453855.1
MED14	NC_040046.1	82756253	82756957	peak_480	705	+	PR_intron	rna-XM_027449005.1
VIT	NC_040048.1	30721863	30722043	peak_4800	181	+	utr5	rna-XM_005022225.4
VIT	NC_040048.1	30749392	30751441	peak_4801	2050	+	PR_intron	rna-XM_005022225.4
TMEM151B	NC_040048.1	32794394	32794634	peak_4838	241	+	utr3	rna-XM_027454009.1
LOC113843157	NC_040048.1	33079204	33079411	peak_4840	208	+	cds	rna-XM_027454017.1
MCFD2	NC_040048.1	36334810	36336240	peak_4854	1431	+	PR_intron	rna-XM_005009819.4
PCNX2	NC_040048.1	40767503	40767683	peak_4873	181	+	cds	rna-XM_027454154.1
PCNX2	NC_040048.1	40767922	40768072	peak_4874	151	+	cds	rna-XM_027454154.1
PCNX2	NC_040048.1	40768371	40768492	peak_4875	122	+	cds	rna-XM_027454154.1
PCNX2	NC_040048.1	40768610	40777804	peak_4876	9195	+	PR_intron	rna-XM_027454154.1
URB2	NC_040048.1	42049405	42049526	peak_4890	122	+	cds	rna-XM_027454176.1
COG2	NC_040048.1	42396608	42398323	peak_4895	1716	+	PR_intron	rna-XM_027454182.1
GNPAT	NC_040048.1	42634470	42635084	peak_4896	615	+	PR_intron	rna-XM_027454195.1
GNPAT	NC_040048.1	42654118	42654238	peak_4897	121	+	utr3	rna-XM_027454193.1
PHF10	NC_040048.1	43106543	43107440	peak_4902	898	+	PR_intron	rna-XM_027454217.1
FRMD1	NC_040048.1	44101723	44101903	peak_4905	181	+	cds	rna-XM_027454234.1
LOC110353690	NC_040048.1	46126917	46127037	peak_4912	121	+	NP_exon	gene-LOC110353690.trans
AGPAT4	NC_040048.1	47581156	47581277	peak_4913	122	+	utr3	rna-XM_027454276.1
STX11	NC_040048.1	48287737	48287828	peak_4916	92	+	utr3	rna-XM_027454293.1
RAB32	NC_040048.1	49293562	49293653	peak_4930	92	+	utr5	rna-XM_005021551.4
RAB32	NC_040048.1	49310563	49310774	peak_4931	212	+	utr3	rna-XM_005021551.4
MTHFD1L	NC_040048.1	51304952	51305043	peak_4960	92	+	utr3	rna-XM_027454366.1
MTHFD1L	NC_040048.1	51304929	51305049	peak_4961	121	+	utr3	rna-XM_027454366.1
97717df5-85c9-409c-b480-491de14099c4	NC_040048.1	51692345	51692436	peak_4973	92	+	NP_exon	97717df5-85c9-409c-b480-491de14099c4.trans
VIP	NC_040048.1	52073927	52073986	peak_4975	60	+	utr5	rna-XM_027454372.1
IL20RA	NC_040048.1	57804766	57804886	peak_5030	121	+	cds	rna-XM_027454461.1
ALDH8A1	NC_040048.1	58778901	58779110	peak_5044	210	+	cds	rna-XM_005014086.4
MOXD1	NC_040048.1	59938138	59938229	peak_5050	92	+	cds	rna-XM_027454508.1
MOXD1	NC_040048.1	59949521	59951190	peak_5051	1670	+	PR_intron	rna-XM_027454508.1
MED23	NC_040048.1	60406947	60407068	peak_5053	122	+	utr3	rna-XM_027453554.1
MED23	NC_040048.1	60406950	60407070	peak_5054	121	+	utr3	rna-XM_027453554.1
FAM184A	NC_040048.1	66127047	66127167	peak_5070	121	+	cds	rna-XM_027454634.1
FAM184A	NC_040048.1	66129316	66142411	peak_5071	13096	+	PR_intron	rna-XM_027454634.1
DSCAM	NC_040046.1	91234928	91241998	peak_509	7071	+	PR_intron	rna-XM_027449086.1
AK9	NC_040048.1	70484565	70487400	peak_5097	2836	+	PR_intron	rna-XM_021270213.2
DSCAM	NC_040046.1	91276798	91276859	peak_510	62	+	cds	rna-XM_027449086.1
SCML4	NC_040048.1	71289555	71289646	peak_5105	92	+	cds	rna-XM_021270191.2
CD24	NC_040048.1	71588830	71591101	peak_5109	2272	+	PR_intron	rna-XM_027454755.1
CD24	NC_040048.1	71591336	71591632	peak_5110	297	+	utr3	rna-XM_027454755.1
SIM1	NC_040048.1	74879498	74879709	peak_5117	212	+	utr5	rna-XM_027454792.1
SIM1	NC_040048.1	74927244	74927731	peak_5118	488	+	cds	rna-XM_027454792.1
SIM1	NC_040048.1	74927819	74928030	peak_5119	212	+	cds	rna-XM_027454792.1
GPR63	NC_040048.1	76755655	76755955	peak_5131	301	+	cds	rna-XM_027454828.1
GPR63	NC_040048.1	76756164	76756345	peak_5132	182	+	cds	rna-XM_027454828.1
BORCS6	NC_040048.1	80180260	80180470	peak_5147	211	+	utr3	rna-XM_027454914.1
LOC113843285	NC_040048.1	80196378	80200415	peak_5148	4038	+	PR_intron	rna-XM_027454915.1
ELOVL4	NC_040048.1	83812632	83812753	peak_5169	122	+	utr3	rna-XM_027454956.1
COL9A1	NC_040048.1	87614015	87614166	peak_5191	152	+	cds	rna-XM_027455030.1
COL9A1	NC_040048.1	87636909	87641108	peak_5192	4200	+	PR_intron	rna-XM_027455030.1
COL9A1	NC_040048.1	87659600	87661371	peak_5193	1772	+	PR_intron	rna-XM_027455030.1
COL9A1	NC_040048.1	87669647	87669738	peak_5194	92	+	utr3	rna-XM_027455031.1
KHDRBS2	NC_040048.1	91212820	91213031	peak_5195	212	+	utr5	rna-XM_021269154.2
RAB23	NC_040048.1	91976519	91977919	peak_5196	1401	+	PR_intron	rna-XM_027455069.1
LOC113843303	NC_040048.1	92251995	92252115	peak_5212	121	+	cds	rna-XM_027455071.1
HMGCLL1	NC_040048.1	92820219	92820340	peak_5219	122	+	utr3	rna-XM_027455089.1
GREB1	NC_040048.1	103495129	103495279	peak_5255	151	+	cds	rna-XM_027455242.1
RUNX1	NC_040046.1	93536834	93536895	peak_526	62	+	utr3	rna-XM_027449139.1
FAM228B	NC_040048.1	110868083	110868144	peak_5279	62	+	utr3	rna-XM_013093393.3
TFAP2B	NC_040048.1	113830678	113830919	peak_5300	242	+	cds	rna-XM_027455362.1
TFAP2B	NC_040048.1	113851809	113852140	peak_5301	332	+	cds	rna-XM_027455362.1
SLC35F3	NC_040048.1	27417	27478	peak_5353	62	-	utr3	rna-XM_027452985.1
KCNH1	NC_040048.1	775777	775958	peak_5356	182	-	cds	rna-XM_027453007.1
FBXO28	NC_040048.1	1831555	1834023	peak_5370	2469	-	PR_intron	rna-XM_027453067.1
LOC101799042	NC_040048.1	1915162	1918298	peak_5371	3137	-	PR_intron	rna-XM_027453073.1
FOXA2	NC_040048.1	4893249	4893519	peak_5410	271	-	cds	rna-XM_027453178.1
FOXA2	NC_040048.1	4893877	4894028	peak_5411	152	-	cds	rna-XM_027453178.1
NAPB	NC_040048.1	5019762	5019851	peak_5416	90	-	utr5	rna-XM_027453185.1
FBLN7	NC_040048.1	5078711	5078802	peak_5422	92	-	utr5	rna-XM_027453189.1
LOC101802171	NC_040046.1	95207788	95207969	peak_546	182	+	cds	rna-XM_021271191.2
LOC101802171	NC_040046.1	95209677	95209768	peak_547	92	+	cds	rna-XM_021271191.2
SNAP25	NC_040048.1	12420698	12437329	peak_5477	16632	-	PR_intron	rna-XM_027453378.1
LOC101802171	NC_040046.1	95219567	95219774	peak_549	208	+	PR_intron	rna-XM_021271191.2
LTN1	NC_040046.1	95652567	95652688	peak_553	122	+	cds	rna-XM_027449246.1
PYGB	NC_040048.1	16450748	16450839	peak_5530	92	-	utr3	rna-XM_027453534.1
56fb2542-d47f-43af-8248-141f5cbedb62	NC_040048.1	16825574	16825865	peak_5544	292	-	NP_exon	56fb2542-d47f-43af-8248-141f5cbedb62.trans
56fb2542-d47f-43af-8248-141f5cbedb62	NC_040048.1	16825574	16825872	peak_5545	299	-	NP_exon	56fb2542-d47f-43af-8248-141f5cbedb62.trans
SYNDIG1	NC_040048.1	16878466	16878556	peak_5546	91	-	cds	rna-XM_027453553.1
30b98d55-c2a2-40b2-bcec-3415d440ce2c	NC_040048.1	28076584	28076644	peak_5618	61	-	NP_exon	30b98d55-c2a2-40b2-bcec-3415d440ce2c.trans
C1H21orf91	NC_040046.1	100323097	100323429	peak_564	333	+	cds	rna-XM_005019873.4
NFKBIE	NC_040048.1	32767367	32767637	peak_5644	271	-	PR_intron	rna-XM_027454006.1
KIF6	NC_040048.1	34178583	34178644	peak_5656	62	-	cds	rna-XM_027454040.1
SIX3	NC_040048.1	37507154	37507214	peak_5681	61	-	utr3	rna-XM_027454092.1
SIX3	NC_040048.1	37507922	37507982	peak_5682	61	-	cds	rna-XM_027454092.1
SLC3A1	NC_040048.1	37894896	37895076	peak_5683	181	-	PR_intron	rna-XM_013095563.3
NUP133	NC_040048.1	41982646	41982844	peak_5716	199	-	PR_intron	rna-XM_027454173.1
HTR1F	NC_040046.1	107244608	107244699	peak_578	92	+	cds	rna-XM_013097677.3
HTR1F	NC_040046.1	107244996	107245206	peak_579	211	+	cds	rna-XM_013097677.3
ADGRG6	NC_040048.1	55670240	55670360	peak_5793	121	-	utr3	rna-XM_027454428.1
ADGRG6	NC_040048.1	55672149	55672269	peak_5794	121	-	utr3	rna-XM_027454428.1
ADGRG6	NC_040048.1	55670244	55670364	peak_5795	121	-	utr3	rna-XM_027454428.1
ADGRG6	NC_040048.1	55672159	55672250	peak_5796	92	-	utr3	rna-XM_027454428.1
CCDC28A	NC_040048.1	57074260	57074320	peak_5799	61	-	utr5	rna-XM_027454447.1
TNFAIP3	NC_040048.1	57485563	57486538	peak_5801	976	-	PR_intron	rna-XM_021271096.2
TNFAIP3	NC_040048.1	57488244	57488692	peak_5802	449	-	cds	rna-XM_021271096.2
MYB	NC_040048.1	58647138	58647685	peak_5806	548	-	PR_intron	rna-XM_027454485.1
ENPP1	NC_040048.1	60274924	60275185	peak_5812	262	-	PR_intron	rna-XM_027454510.1
CLVS2	NC_040048.1	64445342	64445463	peak_5833	122	-	utr3	rna-XM_005017362.4
KPNA5	NC_040048.1	67213142	67215083	peak_5846	1942	-	PR_intron	rna-XM_027454662.1
CRYBG1	NC_040048.1	71754778	71754989	peak_5881	212	-	cds	rna-XM_027453695.1
CRYBG1	NC_040048.1	71760566	71760897	peak_5882	332	-	cds	rna-XM_027453695.1
CRYBG1	NC_040048.1	71760956	71761376	peak_5883	421	-	cds	rna-XM_027453695.1
CRYBG1	NC_040048.1	71761525	71761796	peak_5884	272	-	cds	rna-XM_027453695.1
MAEL	NC_040046.1	108046550	108046701	peak_590	152	+	utr5	rna-XM_005017622.4
NT5E	NC_040048.1	81350857	81350948	peak_5927	92	-	utr3	rna-XM_027454936.1
LOC101795819	NC_040048.1	82001084	82001145	peak_5928	62	-	cds	rna-XM_027454946.1
FAM83B	NC_040048.1	92984169	92984470	peak_5981	302	-	cds	rna-XM_027455094.1
LOC113843317	NC_040048.1	94506613	94506733	peak_5987	121	-	cds	rna-XM_027455187.1
a26674a7-e408-4bc5-85b5-4330e45b02e1	NC_040048.1	96502122	96502213	peak_5991	92	-	NP_exon	a26674a7-e408-4bc5-85b5-4330e45b02e1.trans
a26674a7-e408-4bc5-85b5-4330e45b02e1	NC_040048.1	96502120	96502211	peak_5994	92	-	NP_exon	a26674a7-e408-4bc5-85b5-4330e45b02e1.trans
FAM110C	NC_040048.1	97471637	97471817	peak_6004	181	-	NP_exon	rna-XR_003496591.1
ADI1	NC_040048.1	99640631	99640692	peak_6008	62	-	PR_intron	rna-NM_001285955.1
ADI1	NC_040048.1	99643610	99644506	peak_6009	897	-	PR_intron	rna-XM_027452961.1
E2F6	NC_040048.1	103403490	103403730	peak_6027	241	-	utr3	rna-XM_013094398.3
WDR35	NC_040048.1	107852967	107854054	peak_6040	1088	-	PR_intron	rna-XM_027455277.1
LOC101794341	NC_040048.1	115012104	115014098	peak_6081	1995	-	PR_intron	rna-XM_027455394.1
PROS1	NC_040046.1	110262597	110262687	peak_609	91	+	NP_exon	rna-XR_003494779.1
PROS1	NC_040046.1	110286581	110286732	peak_610	152	+	NP_exon	rna-XR_003494779.1
LOC113843363	NC_040048.1	116525594	116525744	peak_6102	151	-	cds	rna-XM_027455453.1
ADCY3	NC_040048.1	116708058	116708330	peak_6103	273	-	cds	rna-XM_027455454.1
LOC101803350	NC_040048.1	116911101	116911222	peak_6113	122	-	cds	rna-XM_027455482.1
NUGGC	NC_040048.1	116924864	116925107	peak_6114	244	-	PR_intron	rna-XM_027455485.1
PTK2B	NC_040048.1	116965908	116966149	peak_6115	242	-	utr3	rna-XM_027455492.1
LOC110354782	NC_040048.1	117021891	117022102	peak_6116	212	-	NP_exon	gene-LOC110354782.trans
HJURP	NC_040046.1	112261838	112261988	peak_614	151	+	cds	rna-XM_027449460.1
PLA2G12A	NC_040049.1	4117060	4117241	peak_6147	182	+	utr3	rna-XM_027455941.1
PLA2G12A	NC_040049.1	4118319	4118530	peak_6148	212	+	utr3	rna-XM_027455941.1
HJURP	NC_040046.1	112262405	112262614	peak_615	210	+	cds	rna-XM_027449460.1
BDH2	NC_040049.1	6242442	6245348	peak_6175	2907	+	PR_intron	rna-XM_027455992.1
TSPAN5	NC_040049.1	7392770	7392860	peak_6207	91	+	utr3	rna-XM_027457262.1
TSPAN5	NC_040049.1	7392763	7392824	peak_6208	62	+	utr3	rna-XM_027457262.1
SNCA	NC_040049.1	11521285	11521986	peak_6216	702	+	PR_intron	rna-XM_027456454.1
SENP7	NC_040046.1	114634345	114635376	peak_625	1032	+	PR_intron	rna-XM_027449534.1
SH2D4A	NC_040049.1	16422276	16423233	peak_6270	958	+	PR_intron	rna-XM_005025123.4
MTNR1A	NC_040049.1	19425400	19425520	peak_6296	121	+	PR_intron	rna-XM_027456672.1
MTNR1A	NC_040049.1	19464324	19464565	peak_6297	242	+	utr3	rna-XM_027456672.1
NDUFB1	NC_040049.1	19528516	19530452	peak_6298	1937	+	PR_intron	rna-XM_027456235.1
UFSP2	NC_040049.1	20061267	20062358	peak_6302	1092	+	PR_intron	rna-XM_027456270.1
ACSL1	NC_040049.1	20335248	20337943	peak_6306	2696	+	PR_intron	rna-XM_027456285.1
ACSL1	NC_040049.1	20338985	20339417	peak_6307	433	+	PR_intron	rna-XM_027456285.1
GLRA3	NC_040049.1	24170983	24171164	peak_6316	182	+	cds	rna-XM_027456515.1
HAND2	NC_040049.1	24674250	24675165	peak_6318	916	+	PR_intron	rna-XM_027456406.1
SH3D19	NC_040049.1	32672109	32672260	peak_6354	152	+	cds	rna-XM_027456226.1
SH3D19	NC_040049.1	32680916	32682432	peak_6355	1517	+	PR_intron	rna-XM_027456226.1
SLC10A7	NC_040049.1	34601133	34601224	peak_6364	92	+	utr3	rna-XM_013094904.3
LOC101795385	NC_040049.1	34964282	34964926	peak_6367	645	+	PR_intron	rna-XM_027455773.1
SLC7A11	NC_040049.1	37158919	37159130	peak_6387	212	+	utr5	rna-XM_005027130.4
TRPC3	NC_040049.1	43316305	43316725	peak_6410	421	+	cds	rna-XM_027456875.1
BBS7	NC_040049.1	43349559	43349868	peak_6411	310	+	cds	rna-XM_027456240.1
HELQ	NC_040049.1	44457178	44457268	peak_6428	91	+	NP_exon	rna-XR_003497123.1
LONRF1	NC_040049.1	47755468	47755827	peak_6467	360	+	utr3	rna-XM_027457046.1
SCFD2	NC_040049.1	48967215	48967365	peak_6474	151	+	NP_exon	rna-XR_003497173.1
TEC	NC_040049.1	49665682	49665773	peak_6480	92	+	utr5	rna-XM_027457126.1
TEC	NC_040049.1	49710015	49710076	peak_6481	62	+	cds	rna-XM_027457129.1
GABRA4	NC_040049.1	50194576	50194697	peak_6484	122	+	utr3	rna-XM_027457146.1
GABRA2	NC_040049.1	50374179	50374715	peak_6485	537	+	PR_intron	rna-XM_027457149.1
GABRG1	NC_040049.1	50415948	50416009	peak_6486	62	+	utr5	rna-XM_027457150.1
KCTD8	NC_040049.1	51023172	51026929	peak_6489	3758	+	PR_intron	rna-XM_021269447.2
KCTD8	NC_040049.1	51112707	51113007	peak_6490	301	+	cds	rna-XM_021269447.2
BEND4	NC_040049.1	51687460	51687640	peak_6491	181	+	cds	rna-XM_027457179.1
BEND4	NC_040049.1	51705630	51709178	peak_6492	3549	+	PR_intron	rna-XM_027457179.1
TMEM156	NC_040049.1	52957884	52958035	peak_6505	152	+	utr3	rna-XM_013109691.3
ARAP2	NC_040049.1	53783051	53783171	peak_6510	121	+	NP_exon	rna-XR_003497218.1
ARAP2	NC_040049.1	53783230	53783560	peak_6511	331	+	cds	rna-XM_027457267.1
ARAP2	NC_040049.1	53894000	53899841	peak_6512	5842	+	PR_intron	rna-XM_027457267.1
UPK1B	NC_040046.1	118737398	118737459	peak_654	62	+	utr3	rna-XM_027449623.1
PROM1	NC_040049.1	60771704	60771944	peak_6540	241	+	utr5	rna-XM_027457352.1
FGFBP1	NC_040049.1	60849862	60851408	peak_6541	1547	+	PR_intron	rna-XM_005016971.4
UPK1B	NC_040046.1	118737667	118737848	peak_655	182	+	utr3	rna-XM_027449623.1
STK32B	NC_040049.1	63431682	63440721	peak_6558	9040	+	PR_intron	rna-XM_027457400.1
STK32B	NC_040049.1	63554603	63554694	peak_6559	92	+	PR_intron	rna-XM_027457399.1
TMEM39A	NC_040046.1	118927897	118927987	peak_656	91	+	utr5	rna-XM_027449627.1
STK32B	NC_040049.1	63572598	63572749	peak_6560	152	+	cds	rna-XM_027457399.1
MAN2B2	NC_040049.1	64311773	64312699	peak_6566	927	+	PR_intron	rna-XM_027457427.1
TMEM39A	NC_040046.1	118945925	118946075	peak_657	151	+	cds	rna-XM_021270727.2
SH3TC1	NC_040049.1	65459215	65459485	peak_6577	271	+	cds	rna-XM_005016196.4
SH3TC1	NC_040049.1	65459604	65459845	peak_6578	242	+	cds	rna-XM_005016196.4
LOC113843439	NC_040049.1	70626417	70626477	peak_6618	61	+	cds	rna-XM_027455756.1
FBXO41	NC_040049.1	74616373	74616494	peak_6631	122	+	cds	rna-XM_027455852.1
CDS1	NC_040049.1	242032	242182	peak_6657	151	-	utr3	rna-XM_013096177.3
MMRN1	NC_040049.1	11495728	11495909	peak_6711	182	-	cds	rna-XM_005019564.4
STXBP5L	NC_040046.1	119974052	119974143	peak_672	92	+	utr3	rna-XM_027449672.1
SRP72	NC_040049.1	12313456	12313832	peak_6723	377	-	PR_intron	rna-XM_013108019.2
NOA1	NC_040049.1	12373664	12373903	peak_6726	240	-	cds	rna-XM_005028891.4
GUCY1B1	NC_040049.1	30764743	30765131	peak_6837	389	-	PR_intron	rna-XM_027456603.1
NPY2R	NC_040049.1	31013755	31013846	peak_6841	92	-	cds	rna-XM_027456616.1
NPY2R	NC_040049.1	31014500	31015849	peak_6842	1350	-	PR_intron	rna-XM_027456617.1
DCLK2	NC_040049.1	33183057	33183178	peak_6858	122	-	cds	rna-XM_027456227.1
FGF2	NC_040049.1	42963349	42963440	peak_6916	92	-	cds	rna-XM_027456827.1
SEC24D	NC_040049.1	44381573	44381663	peak_6932	91	-	PR_intron	rna-XM_027456900.1
SCNN1A	NC_040046.1	121486736	121487034	peak_695	299	+	PR_intron	rna-XM_027449730.1
FGF5	NC_040049.1	45888633	45888693	peak_6950	61	-	utr3	rna-XM_027456984.1
TRMT9B	NC_040049.1	47630665	47630935	peak_6966	271	-	cds	rna-XM_027457047.1
TRMT9B	NC_040049.1	47631054	47631234	peak_6967	181	-	cds	rna-XM_027457047.1
LOC101797218	NC_040049.1	47781242	47781332	peak_6968	91	-	cds	rna-XM_027457045.1
LOC101797218	NC_040049.1	47781391	47782125	peak_6969	735	-	PR_intron	rna-XM_027457045.1
CWH43	NC_040049.1	49360431	49360522	peak_6988	92	-	utr3	rna-XM_027457104.1
GUF1	NC_040049.1	50934949	50936101	peak_6996	1153	-	PR_intron	rna-XM_027457154.1
KLF3	NC_040049.1	53046286	53046556	peak_7017	271	-	cds	rna-XM_027457242.1
KLF3	NC_040049.1	53052963	53063851	peak_7018	10889	-	PR_intron	rna-XM_027457242.1
PGM2	NC_040049.1	53352526	53352587	peak_7020	62	-	utr5	rna-XM_027457252.1
C4H4orf19	NC_040049.1	53407253	53408500	peak_7021	1248	-	PR_intron	rna-XM_027457255.1
SOD3	NC_040049.1	57688149	57688210	peak_7036	62	-	cds	rna-XM_013099268.3
LRRC23	NC_040046.1	121840961	121841198	peak_707	238	+	utr5	rna-XM_027449793.1
d538aa3b-7335-42f1-ab4d-70e92a6ad742	NC_040049.1	65582499	65582619	peak_7088	121	-	NP_exon	d538aa3b-7335-42f1-ab4d-70e92a6ad742.trans
d538aa3b-7335-42f1-ab4d-70e92a6ad742	NC_040049.1	65582497	65582618	peak_7089	122	-	NP_exon	d538aa3b-7335-42f1-ab4d-70e92a6ad742.trans
HMX1	NC_040049.1	66054117	66054328	peak_7090	212	-	utr3	rna-XM_027455597.1
HTT	NC_040049.1	66845236	66845297	peak_7099	62	-	cds	rna-XM_027455607.1
FOXI3	NC_040049.1	70774535	70774626	peak_7153	92	-	utr3	rna-XM_027455762.1
FOXI3	NC_040049.1	70774685	70774805	peak_7154	121	-	utr3	rna-XM_027455762.1
MAVS	NC_040049.1	73476682	73476862	peak_7163	181	-	utr3	rna-XM_027455821.1
LOC101792170	NC_040049.1	74791093	74791184	peak_7188	92	-	utr3	rna-XM_027455862.1
C1S	NC_040046.1	121936691	121936841	peak_719	151	+	cds	rna-XM_005016768.4
LOC101797054	NC_040046.1	122510332	122511982	peak_724	1651	+	PR_intron	rna-XM_005016448.4
KLHDC2	NC_040050.1	6858405	6858496	peak_7252	92	+	PR_intron	rna-XM_027459549.1
ABHD12B	NC_040050.1	7201441	7202007	peak_7256	567	+	PR_intron	rna-XM_027457908.1
RTRAF	NC_040050.1	7333854	7335518	peak_7263	1665	+	PR_intron	rna-XM_027457935.1
PTGER2	NC_040050.1	7379799	7380039	peak_7267	241	+	utr3	rna-XM_027458896.1
KIAA0586	NC_040050.1	9377061	9377415	peak_7310	355	+	PR_intron	rna-XM_027458634.1
LOC101799495	NC_040050.1	11391021	11391262	peak_7337	242	+	NP_intron	rna-XR_003497622.1
LOC101799495	NC_040050.1	11395191	11395252	peak_7338	62	+	NP_exon	rna-XR_002403606.2
AKAP5	NC_040050.1	11818030	11818151	peak_7349	122	+	cds	rna-XM_027458023.1
AKAP5	NC_040050.1	11818210	11818420	peak_7350	211	+	cds	rna-XM_027458023.1
a6d424a7-18e6-4058-9230-514ff4e07f2a	NC_040050.1	11819289	11819439	peak_7351	151	+	NP_exon	a6d424a7-18e6-4058-9230-514ff4e07f2a.trans
AKAP5	NC_040050.1	11821293	11821443	peak_7352	151	+	utr3	rna-XM_027458023.1
AKAP5	NC_040050.1	11817456	11817517	peak_7353	62	+	utr5	rna-XM_027458023.1
AKAP5	NC_040050.1	11818055	11818326	peak_7354	272	+	cds	rna-XM_027458023.1
a6d424a7-18e6-4058-9230-514ff4e07f2a	NC_040050.1	11819283	11819434	peak_7355	152	+	NP_exon	a6d424a7-18e6-4058-9230-514ff4e07f2a.trans
AKAP5	NC_040050.1	11821290	11821381	peak_7356	92	+	utr3	rna-XM_027458023.1
ANKRD9	NC_040050.1	15371218	15371337	peak_7398	120	+	cds	rna-XM_027458640.1
FGF6	NC_040046.1	124524665	124524815	peak_746	151	+	utr3	rna-XM_027449911.1
LOC101802088	NC_040046.1	124912989	124913110	peak_748	122	+	cds	rna-XM_005012647.4
LOC101801895	NC_040046.1	125017881	125018271	peak_750	391	+	cds	rna-XM_027449919.1
LOC101801895	NC_040046.1	125018719	125018989	peak_751	271	+	cds	rna-XM_027449919.1
TGFB3	NC_040050.1	27958466	27958556	peak_7512	91	+	cds	rna-XM_027458480.1
LOC101801566	NC_040046.1	125089939	125090030	peak_752	92	+	utr5	rna-XM_005012644.4
ACYP1	NC_040050.1	28320160	28320444	peak_7520	285	+	PR_intron	rna-XM_027457828.1
LOC101801566	NC_040046.1	125106681	125106742	peak_753	62	+	utr3	rna-XM_005012644.4
PPP2R3C	NC_040050.1	30593941	30594269	peak_7535	329	+	utr3	rna-XM_027459389.1
LOC101801566	NC_040046.1	125111119	125111210	peak_754	92	+	utr3	rna-XM_005012644.4
TSPAN32	NC_040050.1	32653769	32653889	peak_7553	121	+	utr3	rna-XM_013099789.1
PATL1	NC_040050.1	34132024	34132253	peak_7570	230	+	PR_intron	rna-XM_027458465.1
OSBP	NC_040050.1	34139817	34139908	peak_7571	92	+	cds	rna-XM_027458054.1
NTF3	NC_040046.1	125436051	125436381	peak_758	331	+	cds	rna-XM_013093098.3
CEND1	NC_040050.1	34735041	34735401	peak_7594	361	+	cds	rna-XM_027458399.1
DEAF1	NC_040050.1	34882660	34882869	peak_7596	210	+	utr3	rna-XM_027458101.1
PAK6	NC_040050.1	35030724	35030785	peak_7599	62	+	cds	rna-XM_005019175.4
PAK6	NC_040050.1	35034532	35034743	peak_7600	212	+	cds	rna-XM_005019175.4
PAK6	NC_040050.1	35041291	35041382	peak_7601	92	+	cds	rna-XM_005019175.4
ETNK1	NC_040046.1	127689321	127689381	peak_764	61	+	utr3	rna-XM_013102892.3
HARBI1	NC_040050.1	36201115	36201296	peak_7641	182	+	cds	rna-XM_027459373.1
CHAC1	NC_040050.1	37241076	37241407	peak_7668	332	+	utr3	rna-XM_027459565.1
LOC101790054	NC_040050.1	37462503	37467101	peak_7675	4599	+	PR_intron	rna-XM_021278464.2
ETFRF1	NC_040046.1	128072116	128072177	peak_769	62	+	utr5	rna-XM_021274801.2
CAPN3	NC_040050.1	38607720	38611301	peak_7700	3582	+	PR_intron	rna-XM_027459506.1
LOC101795725	NC_040050.1	40469456	40469517	peak_7733	62	+	cds	rna-XM_021273796.2
LOC101795725	NC_040050.1	40469816	40469876	peak_7734	61	+	cds	rna-XM_021273796.2
CCDC177	NC_040050.1	41024343	41024644	peak_7745	302	+	utr3	rna-XM_027459458.1
CCDC177	NC_040050.1	41024344	41024644	peak_7747	301	+	utr3	rna-XM_027459458.1
cfabdb01-0613-4633-a67c-e70d856a4e8e	NC_040046.1	129079022	129079233	peak_776	212	+	NP_exon	cfabdb01-0613-4633-a67c-e70d856a4e8e.trans
LOC101793409	NC_040050.1	42056105	42056256	peak_7760	152	+	utr3	rna-XM_027457985.1
ATP6V1D	NC_040050.1	42140084	42140885	peak_7761	802	+	PR_intron	rna-XM_027459587.1
ATP6V1D	NC_040050.1	42142992	42143743	peak_7762	752	+	PR_intron	rna-XM_027459587.1
SRP14	NC_040050.1	42660094	42660153	peak_7763	60	+	cds	rna-XM_021272286.1
cfabdb01-0613-4633-a67c-e70d856a4e8e	NC_040046.1	129080519	129080700	peak_777	182	+	NP_exon	cfabdb01-0613-4633-a67c-e70d856a4e8e.trans
cfabdb01-0613-4633-a67c-e70d856a4e8e	NC_040046.1	129079013	129079252	peak_778	240	+	NP_exon	cfabdb01-0613-4633-a67c-e70d856a4e8e.trans
STXBP6	NC_040050.1	46029313	46034462	peak_7784	5150	+	PR_intron	rna-XM_027458350.1
NUBPL	NC_040050.1	48332260	48333296	peak_7788	1037	+	PR_intron	rna-XM_027458185.1
NUBPL	NC_040050.1	48422175	48422385	peak_7789	211	+	utr3	rna-XM_027458184.1
cfabdb01-0613-4633-a67c-e70d856a4e8e	NC_040046.1	129080502	129080712	peak_779	211	+	NP_exon	cfabdb01-0613-4633-a67c-e70d856a4e8e.trans
LRRC56	NC_040050.1	49958421	49958482	peak_7803	62	+	cds	rna-XM_021270569.2
SHISAL1	NC_040046.1	130411386	130411537	peak_787	152	+	PR_intron	rna-XM_027450087.1
FADS1	NC_040050.1	58092427	58092636	peak_7881	210	+	utr3	rna-XM_027459435.1
FADS1	NC_040050.1	58092814	58093054	peak_7882	241	+	utr3	rna-XM_027459435.1
LUZP2	NC_040050.1	59833584	59833762	peak_7894	179	+	utr5	rna-XM_027458139.1
ANO3	NC_040050.1	60293138	60293259	peak_7895	122	+	utr3	rna-XM_027458921.1
ANO3	NC_040050.1	60293138	60293259	peak_7896	122	+	utr3	rna-XM_027458921.1
METTL15	NC_040050.1	60855090	60855210	peak_7901	121	+	cds	rna-XM_027458141.1
OLFML1	NC_040050.1	63594723	63595927	peak_7928	1205	+	PR_intron	rna-XM_005013980.4
RIBC2	NC_040046.1	131642741	131643009	peak_793	269	+	utr3	rna-XM_005010061.4
RPRM	NC_040050.1	3053828	3054427	peak_7972	600	-	cds	rna-XM_027459123.1
NR4A2	NC_040050.1	3593645	3593795	peak_7973	151	-	cds	rna-XM_027457891.1
CYTIP	NC_040050.1	3827518	3827609	peak_7975	92	-	cds	rna-XM_027458292.1
LRFN5	NC_040050.1	6507357	6507685	peak_7996	329	-	cds	rna-XM_027458577.1
DNAAF2	NC_040050.1	6795946	6796185	peak_7997	240	-	cds	rna-XM_005017402.4
DNAAF2	NC_040050.1	6795947	6796186	peak_7998	240	-	cds	rna-XM_005017402.4
VCPKMT	NC_040050.1	6920917	6921822	peak_8001	906	-	PR_intron	rna-XM_027457902.1
613b2c34-b28f-43e1-8b9d-63b35761a22f	NC_040050.1	9184077	9184317	peak_8038	241	-	NP_exon	613b2c34-b28f-43e1-8b9d-63b35761a22f.trans
613b2c34-b28f-43e1-8b9d-63b35761a22f	NC_040050.1	9184074	9184586	peak_8040	513	-	NP_exon	613b2c34-b28f-43e1-8b9d-63b35761a22f.trans
RTN1	NC_040050.1	9865135	9865195	peak_8045	61	-	cds	rna-XM_027458051.1
ESR2	NC_040050.1	11682490	11682611	peak_8058	122	-	cds	rna-XM_021274552.2
ZFYVE21	NC_040050.1	14447183	14453122	peak_8081	5940	-	PR_intron	rna-XM_027458044.1
TRMT61A	NC_040050.1	14603666	14603815	peak_8087	150	-	cds	rna-XM_027457895.1
TRMT61A	NC_040050.1	14623409	14623558	peak_8088	150	-	cds	rna-XM_027457895.1
SLC24A4	NC_040050.1	20641591	20641802	peak_8148	212	-	utr3	rna-XM_027459273.1
LOC110351708	NC_040050.1	27065399	27065697	peak_8177	299	-	cds	rna-XM_027458604.1
VASH1	NC_040050.1	27507396	27507545	peak_8180	150	-	utr3	rna-XM_027458440.1
ESRRB	NC_040050.1	27631720	27631810	peak_8181	91	-	utr3	rna-XM_013094211.3
ESRRB	NC_040050.1	27634744	27634865	peak_8182	122	-	cds	rna-XM_005013869.4
LOC101798081	NC_040050.1	28627362	28627542	peak_8213	181	-	utr3	rna-XM_027458651.1
LOC101798081	NC_040050.1	28627394	28627545	peak_8214	152	-	utr3	rna-XM_027458651.1
BBOF1	NC_040050.1	28796742	28796862	peak_8216	121	-	cds	rna-XM_027459606.1
PAX9	NC_040050.1	29901298	29901359	peak_8224	62	-	utr3	rna-XM_027457584.1
c458ca0c-be36-4e62-b603-1d463b9fe4d8	NC_040050.1	30535403	30535633	peak_8226	231	-	NP_exon	c458ca0c-be36-4e62-b603-1d463b9fe4d8.trans
LOC101796197	NC_040050.1	34039770	34040128	peak_8261	359	-	utr3	rna-XM_021278020.2
LOC106017830	NC_040050.1	34122490	34122747	peak_8264	258	-	cds	rna-XM_027458463.1
LOC106017830	NC_040050.1	34123180	34123715	peak_8265	536	-	PR_intron	rna-XM_027458463.1
RAB15	NC_040050.1	34455859	34456226	peak_8272	368	-	PR_intron	rna-XM_027459037.1
UNC93B1	NC_040050.1	34466823	34467002	peak_8273	180	-	utr3	rna-XM_027458992.1
NINJ2	NC_040046.1	139742353	139742414	peak_829	62	+	utr5	rna-XM_021266814.2
PLA2G4F	NC_040050.1	38489043	38489163	peak_8344	121	-	utr3	rna-XM_013101556.3
SLC6A12	NC_040046.1	139987258	139987349	peak_835	92	+	utr3	rna-XM_005011462.4
LOC101796694	NC_040050.1	39139890	39140070	peak_8366	181	-	cds	rna-XM_027457776.1
ZFYVE26	NC_040050.1	42060376	42061581	peak_8409	1206	-	PR_intron	rna-XM_027457960.1
ZFYVE26	NC_040050.1	42098211	42098451	peak_8410	241	-	cds	rna-XM_027457960.1
b714bcac-7661-4693-be89-bac71396314b	NC_040050.1	43972449	43972750	peak_8425	302	-	NP_exon	b714bcac-7661-4693-be89-bac71396314b.trans
b714bcac-7661-4693-be89-bac71396314b	NC_040050.1	43971851	43971912	peak_8426	62	-	NP_exon	b714bcac-7661-4693-be89-bac71396314b.trans
b714bcac-7661-4693-be89-bac71396314b	NC_040050.1	43972450	43972752	peak_8427	303	-	NP_exon	b714bcac-7661-4693-be89-bac71396314b.trans
ARHGAP11A	NC_040050.1	43973656	43974978	peak_8428	1323	-	PR_intron	rna-XM_027457852.1
C5H15orf41	NC_040050.1	44847821	44848002	peak_8433	182	-	NP_exon	rna-XR_003497374.1
FGD4	NC_040046.1	141153592	141153833	peak_844	242	+	cds	rna-XM_005023339.4
CHID1	NC_040050.1	50810223	50810284	peak_8449	62	-	utr5	rna-XM_027459697.1
FGD4	NC_040046.1	141153922	141163174	peak_845	9253	+	PR_intron	rna-XM_005023339.4
ZDHHC13	NC_040050.1	51234456	51234938	peak_8450	483	-	PR_intron	rna-XM_027458871.1
ZDHHC13	NC_040050.1	51234997	51235209	peak_8451	213	-	PR_intron	rna-XM_027458871.1
FGF4	NC_040050.1	51775590	51777750	peak_8455	2161	-	PR_intron	rna-XM_027458794.1
e71c2772-371b-4188-a134-ce1303e2720c	NC_040050.1	52143310	52143551	peak_8458	242	-	NP_exon	e71c2772-371b-4188-a134-ce1303e2720c.trans
e71c2772-371b-4188-a134-ce1303e2720c	NC_040050.1	52143730	52143791	peak_8459	62	-	NP_exon	e71c2772-371b-4188-a134-ce1303e2720c.trans
e71c2772-371b-4188-a134-ce1303e2720c	NC_040050.1	52143311	52143552	peak_8460	242	-	NP_exon	e71c2772-371b-4188-a134-ce1303e2720c.trans
e71c2772-371b-4188-a134-ce1303e2720c	NC_040050.1	52143731	52143792	peak_8461	62	-	NP_exon	e71c2772-371b-4188-a134-ce1303e2720c.trans
SHANK2	NC_040050.1	52167381	52167472	peak_8463	92	-	PR_intron	rna-XM_027457743.1
ABTB2	NC_040050.1	52764043	52764224	peak_8481	182	-	utr3	rna-XM_027458334.1
ABTB2	NC_040050.1	52764672	52764793	peak_8482	122	-	cds	rna-XM_027458334.1
ELF5	NC_040050.1	52965976	52968118	peak_8483	2143	-	PR_intron	rna-XM_027459113.1
SYT13	NC_040050.1	56940841	56940901	peak_8495	61	-	utr3	rna-XM_027458882.1
NDUFS3	NC_040050.1	57454002	57454092	peak_8499	91	-	utr5	rna-XM_027457702.1
VPS51	NC_040050.1	57815685	57815836	peak_8506	152	-	utr3	rna-XM_027458831.1
MYOD1	NC_040050.1	64007318	64007379	peak_8548	62	-	cds	rna-NM_001310358.1
LOC101805444	NC_040050.1	64014281	64014641	peak_8549	361	-	cds	rna-XM_027458182.1
LOC101805444	NC_040050.1	64018093	64018154	peak_8550	62	-	utr5	rna-XM_027458182.1
CFAP46	NC_040051.1	108225	109799	peak_8551	1575	+	PR_intron	rna-XM_027460105.1
TCERG1L	NC_040051.1	1081727	1087695	peak_8555	5969	+	PR_intron	rna-XM_027460383.1
TCERG1L	NC_040051.1	1098570	1098751	peak_8556	182	+	cds	rna-XM_027460383.1
FGFR2	NC_040051.1	5185930	5186529	peak_8581	600	+	utr3	rna-XM_027459971.1
LOC106017841	NC_040051.1	7051113	7051174	peak_8593	62	+	PR_intron	rna-XM_027460282.1
LOC106017841	NC_040051.1	7065303	7065604	peak_8594	302	+	NP_exon	rna-XR_003498006.1
COL17A1	NC_040051.1	12548322	12552171	peak_8629	3850	+	PR_intron	rna-XM_027459883.1
COL17A1	NC_040051.1	12565457	12567592	peak_8630	2136	+	PR_intron	rna-XM_027459883.1
COL17A1	NC_040051.1	12582823	12584033	peak_8631	1211	+	PR_intron	rna-XM_027459883.1
SLIT1	NC_040051.1	14579139	14579349	peak_8657	211	+	utr3	rna-XM_027460663.1
CNNM1	NC_040051.1	14836212	14836451	peak_8660	240	+	cds	rna-XM_027460728.1
f72fc447-7596-48b8-87ce-a88d47587438	NC_040051.1	14899236	14899416	peak_8661	181	+	NP_exon	f72fc447-7596-48b8-87ce-a88d47587438.trans
f72fc447-7596-48b8-87ce-a88d47587438	NC_040051.1	14899138	14899403	peak_8662	266	+	NP_exon	f72fc447-7596-48b8-87ce-a88d47587438.trans
BTAF1	NC_040051.1	16130571	16130631	peak_8675	61	+	cds	rna-XM_027460389.1
STAB2	NC_040046.1	145448236	145448297	peak_868	62	+	cds	rna-XM_027449421.1
LGI1	NC_040051.1	16872591	16872829	peak_8680	239	+	utr5	rna-XM_027460399.1
LGI1	NC_040051.1	16883064	16883571	peak_8681	508	+	PR_intron	rna-XM_027460398.1
GDF10	NC_040051.1	19503739	19503919	peak_8702	181	+	cds	rna-XM_027460396.1
GDF10	NC_040051.1	19504157	19504337	peak_8703	181	+	cds	rna-XM_027460396.1
TM9SF3	NC_040051.1	20960277	20963566	peak_8720	3290	+	PR_intron	rna-XM_027460478.1
EIF3F	NC_040051.1	21482821	21482882	peak_8724	62	+	utr3	rna-XM_027460897.1
LRMDA	NC_040051.1	23197860	23198040	peak_8745	181	+	utr5	rna-XM_027460611.1
CHST11	NC_040046.1	145907662	145908382	peak_877	721	+	cds	rna-XM_027449531.1
WASHC4	NC_040046.1	146025024	146025085	peak_879	62	+	utr5	rna-XM_027449578.1
6139eed5-b95c-4bf5-949c-aeb7ad42730a	NC_040051.1	32819836	32820017	peak_8809	182	+	NP_exon	6139eed5-b95c-4bf5-949c-aeb7ad42730a.trans
6139eed5-b95c-4bf5-949c-aeb7ad42730a	NC_040051.1	32819819	32819997	peak_8810	179	+	NP_exon	6139eed5-b95c-4bf5-949c-aeb7ad42730a.trans
DNA2	NC_040051.1	33379668	33379866	peak_8814	199	+	utr5	rna-XM_005009107.3
DNA2	NC_040051.1	33399688	33402372	peak_8815	2685	+	NP_intron	rna-XR_003497983.1
ALDH18A1	NC_040051.1	414	593	peak_8818	180	-	cds	rna-XM_027460170.1
ACADSB	NC_040051.1	4532432	4536244	peak_8834	3813	-	PR_intron	rna-XM_027460831.1
EMX2	NC_040051.1	7021489	7024959	peak_8856	3471	-	PR_intron	rna-XM_027460281.1
DUSP5	NC_040051.1	10623020	10623141	peak_8878	122	-	cds	rna-XM_027460332.1
CFAP58	NC_040051.1	12400732	12404147	peak_8886	3416	-	PR_intron	rna-XM_005008937.4
CFAP58	NC_040051.1	12413595	12413656	peak_8887	62	-	cds	rna-XM_005008937.4
ASCL4	NC_040046.1	147037214	147037394	peak_891	181	+	cds	rna-XM_013092059.3
PDZD7	NC_040051.1	13892351	13892412	peak_8912	62	-	cds	rna-XM_027460119.1
ASCL4	NC_040046.1	147037812	147037962	peak_892	151	+	cds	rna-XM_013092059.3
LOC101794817	NC_040051.1	20868881	20869121	peak_8981	241	-	utr3	rna-XM_021276115.2
NCOA4	NC_040051.1	28471850	28473865	peak_9029	2016	-	PR_intron	rna-XM_027460660.1
SHLD2	NC_040051.1	28524341	28524432	peak_9032	92	-	cds	rna-XM_027460001.1
ADIRF	NC_040051.1	28575687	28578181	peak_9033	2495	-	PR_intron	rna-XM_027460010.1
LOC101797420	NC_040051.1	29485232	29485353	peak_9039	122	-	PR_intron	rna-XM_005017298.4
e3138c06-1d9c-4aea-a4cd-691052c25586	NC_040051.1	32130364	32130543	peak_9049	180	-	NP_exon	e3138c06-1d9c-4aea-a4cd-691052c25586.trans
e3138c06-1d9c-4aea-a4cd-691052c25586	NC_040051.1	32130336	32130545	peak_9050	210	-	NP_exon	e3138c06-1d9c-4aea-a4cd-691052c25586.trans
ANAPC16	NC_040051.1	32332950	32333071	peak_9055	122	-	utr3	rna-XM_027460246.1
LOC106020238	NC_040051.1	32827776	32827926	peak_9057	151	-	utr5	rna-XM_027460548.1
TYW5	NC_040052.1	4944693	4945348	peak_9132	656	+	PR_intron	rna-XM_027462276.1
ZSWIM2	NC_040052.1	9620210	9620390	peak_9172	181	+	cds	rna-XM_027461526.1
ZSWIM2	NC_040052.1	9620569	9620690	peak_9173	122	+	utr3	rna-XM_027461526.1
SPAG16	NC_040052.1	12817571	12817793	peak_9182	223	+	utr3	rna-XM_027461589.1
IQCA1	NC_040052.1	13799934	13808765	peak_9185	8832	+	PR_intron	rna-XM_027461158.1
USP40	NC_040052.1	14679719	14679840	peak_9192	122	+	utr3	rna-XM_021274446.2
ASB1	NC_040052.1	14783924	14784045	peak_9196	122	+	cds	rna-XM_027461415.1
ASB1	NC_040052.1	14784911	14785211	peak_9197	301	+	utr3	rna-XM_027461415.1
CCDC83	NC_040046.1	5686592	5689394	peak_92	2803	+	PR_intron	rna-XM_027466954.1
LOC101795292	NC_040052.1	15435201	15435292	peak_9200	92	+	cds	rna-XM_027462029.1
PCBP3	NC_040052.1	15547884	15547975	peak_9207	92	+	utr3	rna-XM_027462107.1
FAM117B	NC_040052.1	16565397	16565990	peak_9244	594	+	PR_intron	rna-XM_027461468.1
FAM117B	NC_040052.1	16577171	16577591	peak_9245	421	+	NP_exon	rna-XR_003498368.1
ATP5MC3	NC_040052.1	21567165	21567225	peak_9349	61	+	utr5	rna-XM_027461006.1
KCNH7	NC_040052.1	26033827	26033918	peak_9387	92	+	utr5	rna-XM_027461418.1
IFIH1	NC_040052.1	26262582	26267115	peak_9388	4534	+	PR_intron	rna-NM_001310811.1
IFIH1	NC_040052.1	26280860	26281022	peak_9389	163	+	PR_intron	rna-NM_001310811.1
ITGB6	NC_040052.1	27028121	27028242	peak_9392	122	+	PR_intron	rna-XM_027461832.1
TAB1	NC_040046.1	149646095	149646156	peak_940	62	+	cds	rna-XM_005028302.4
LY75	NC_040052.1	27144902	27144993	peak_9400	92	+	cds	rna-XM_027461496.1
LY75	NC_040052.1	27153224	27154647	peak_9401	1424	+	PR_intron	rna-XM_027461496.1
HSPBAP1	NC_040052.1	29370059	29370389	peak_9445	331	+	NP_exon	rna-XR_003498565.1
HSPBAP1	NC_040052.1	29374741	29374832	peak_9446	92	+	NP_intron	rna-XR_003498564.1
LOC101792439	NC_040052.1	29556975	29557066	peak_9448	92	+	cds	rna-XM_027462248.1
LOC101792439	NC_040052.1	29560267	29560388	peak_9449	122	+	cds	rna-XM_027462248.1
ATF4	NC_040046.1	149715998	149716176	peak_945	179	+	utr5	rna-XM_027450937.1
CNTNAP5	NC_040052.1	31613224	31613315	peak_9453	92	+	cds	rna-XM_027461259.1
CNTNAP5	NC_040052.1	31613404	31613495	peak_9454	92	+	utr3	rna-XM_027461259.1
LOC101801579	NC_040052.1	33046956	33047076	peak_9457	121	+	utr3	rna-XM_027461668.1
MAP3K19	NC_040052.1	33249267	33249357	peak_9459	91	+	cds	rna-XM_005020288.4
MAP3K19	NC_040052.1	33251172	33251292	peak_9460	121	+	utr3	rna-XM_005020288.4
GPR39	NC_040052.1	34041422	34041781	peak_9468	360	+	cds	rna-XM_013100310.3
1a33af56-68f1-4efe-af2b-596b25577ee8	NC_040046.1	149878778	149878959	peak_948	182	+	NP_exon	1a33af56-68f1-4efe-af2b-596b25577ee8.trans
1a33af56-68f1-4efe-af2b-596b25577ee8	NC_040046.1	149879167	149879318	peak_949	152	+	NP_exon	1a33af56-68f1-4efe-af2b-596b25577ee8.trans
1a33af56-68f1-4efe-af2b-596b25577ee8	NC_040046.1	149878733	149878942	peak_950	210	+	NP_exon	1a33af56-68f1-4efe-af2b-596b25577ee8.trans
MAP3K2	NC_040052.1	37455992	37456083	peak_9506	92	+	utr3	rna-XM_027460926.1
1a33af56-68f1-4efe-af2b-596b25577ee8	NC_040046.1	149879179	149879329	peak_951	151	+	NP_exon	1a33af56-68f1-4efe-af2b-596b25577ee8.trans
FAM83F	NC_040046.1	150011748	150012048	peak_952	301	+	cds	rna-XM_021278794.2
FAM83F	NC_040046.1	150025380	150025471	peak_953	92	+	cds	rna-XM_021278794.2
LOC113844105	NC_040052.1	3622017	3622168	peak_9530	152	-	cds	rna-XM_027461218.1
CFLAR	NC_040052.1	4548463	4549548	peak_9538	1086	-	PR_intron	rna-XM_013094741.3
CFLAR	NC_040052.1	4549757	4549877	peak_9539	121	-	cds	rna-XM_013094741.3
FAM83F	NC_040046.1	150025530	150025591	peak_954	62	+	cds	rna-XM_021278794.2
CFLAR	NC_040052.1	4559448	4559749	peak_9540	302	-	cds	rna-XM_013094741.3
PLCL1	NC_040052.1	5504270	5525560	peak_9547	21291	-	PR_intron	rna-XM_005021886.4
FAM83F	NC_040046.1	150025710	150025771	peak_955	62	+	cds	rna-XM_021278794.2
NABP1	NC_040052.1	7903301	7903689	peak_9554	389	-	utr3	rna-XM_027461894.1
MYO1B	NC_040052.1	7963749	7966612	peak_9555	2864	-	PR_intron	rna-XM_027462077.1
MYO1B	NC_040052.1	8040033	8040154	peak_9556	122	-	PR_intron	rna-XM_027462072.1
FAM83F	NC_040046.1	150031774	150031865	peak_956	92	+	utr3	rna-XM_021278794.2
FAM171B	NC_040052.1	9628473	9628593	peak_9569	121	-	cds	rna-XM_027460990.1
FAM171B	NC_040052.1	9628681	9628861	peak_9570	181	-	cds	rna-XM_027460990.1
FAM171B	NC_040052.1	9628470	9628590	peak_9572	121	-	cds	rna-XM_027460990.1
FAM171B	NC_040052.1	9628708	9628858	peak_9573	151	-	cds	rna-XM_027460990.1
IKZF2	NC_040052.1	12279023	12279442	peak_9584	420	-	cds	rna-XM_027461137.1
MLPH	NC_040052.1	13431230	13434280	peak_9599	3051	-	PR_intron	rna-XM_027461825.1
LOC113844143	NC_040052.1	14170507	14170688	peak_9609	182	-	cds	rna-XM_027461708.1
CD28	NC_040052.1	18144338	18144458	peak_9650	121	-	utr3	rna-XM_013096942.3
RBM45	NC_040052.1	20376516	20376577	peak_9669	62	-	cds	rna-XM_027461623.1
HOXD10	NC_040052.1	21195335	21195455	peak_9682	121	-	utr5	rna-XM_005013549.4
LOC113844117	NC_040052.1	23317486	23317607	peak_9692	122	-	utr3	rna-XM_027461445.1
LOC101804634	NC_040052.1	23786459	23786980	peak_9704	522	-	PR_intron	rna-XM_027461604.1
LOC101804634	NC_040052.1	23795580	23796928	peak_9705	1349	-	PR_intron	rna-XM_027461604.1
SLC4A10	NC_040052.1	26472286	26472377	peak_9716	92	-	cds	rna-XM_027461608.1
INHBB	NC_040052.1	30300190	30300899	peak_9746	710	-	cds	rna-XM_027461734.1
03e6c901-b7cf-4943-a625-e063a818ba99	NC_040052.1	30468529	30468740	peak_9749	212	-	NP_exon	03e6c901-b7cf-4943-a625-e063a818ba99.trans
03e6c901-b7cf-4943-a625-e063a818ba99	NC_040052.1	30468547	30468668	peak_9750	122	-	NP_exon	03e6c901-b7cf-4943-a625-e063a818ba99.trans
THSD7B	NC_040052.1	32680076	32680137	peak_9762	62	-	cds	rna-XM_027461622.1
THSD7B	NC_040052.1	32680196	32680257	peak_9763	62	-	cds	rna-XM_027461622.1
GPR39	NC_040052.1	34041445	34041772	peak_9776	328	-	cds	rna-XM_013100310.3
EN1	NC_040052.1	35697939	35701126	peak_9780	3188	-	PR_intron	rna-XM_027461671.1
C1QL2	NC_040052.1	35791238	35791386	peak_9781	149	-	cds	rna-XM_027462177.1
SCTR	NC_040052.1	35895137	35895197	peak_9782	61	-	utr5	rna-XM_027462004.1
WNT10A	NC_040052.1	36182054	36182533	peak_9789	480	-	utr3	rna-XM_027462063.1
WNT10A	NC_040052.1	36182800	36182980	peak_9790	181	-	cds	rna-XM_027462063.1
WNT10A	NC_040052.1	36183099	36185997	peak_9791	2899	-	PR_intron	rna-XM_027462063.1
WNT6	NC_040052.1	36198292	36198562	peak_9792	271	-	cds	rna-XM_027461944.1
XRCC5	NC_040052.1	37359795	37359885	peak_9802	91	-	cds	rna-XM_027461675.1
80baa353-bc5c-475c-b75c-84f78d9d7f99	NC_040052.1	37722241	37722331	peak_9805	91	-	NP_exon	80baa353-bc5c-475c-b75c-84f78d9d7f99.trans
80baa353-bc5c-475c-b75c-84f78d9d7f99	NC_040052.1	37722269	37722330	peak_9806	62	-	NP_exon	80baa353-bc5c-475c-b75c-84f78d9d7f99.trans
LOC101802962	NC_040053.1	971835	971986	peak_9811	152	+	cds	rna-XM_013105791.3
ACSS3	NC_040046.1	150623847	150623968	peak_982	122	+	cds	rna-XM_027451346.1
PTGER3	NC_040053.1	5295154	5295634	peak_9840	481	+	utr3	rna-XM_021272250.2
TM2D1	NC_040053.1	7413398	7413548	peak_9860	151	+	utr3	rna-XM_027462702.1
GLIS1	NC_040053.1	9768707	9769275	peak_9882	569	+	PR_intron	rna-XM_027462877.1
GLIS1	NC_040053.1	9769393	9769454	peak_9883	62	+	cds	rna-XM_027462877.1
GLIS1	NC_040053.1	9859696	9860026	peak_9884	331	+	cds	rna-XM_027462877.1
LRRIQ1	NC_040046.1	152367018	152367138	peak_991	121	+	cds	rna-XM_027451491.1
LRRIQ1	NC_040046.1	152369036	152369217	peak_992	182	+	cds	rna-XM_027451491.1
LOC101794092	NC_040053.1	13654819	13654879	peak_9921	61	+	utr3	rna-XM_005027367.4
ALX1	NC_040046.1	152487696	152487905	peak_993	210	+	utr5	rna-XM_005018392.4
LOC101803314	NC_040053.1	14336824	14337003	peak_9936	180	+	utr3	rna-XM_027463504.1
ALX1	NC_040046.1	152490518	152490578	peak_994	61	+	cds	rna-XM_005018392.4
LOC101795149	NC_040053.1	14448949	14449186	peak_9942	238	+	PR_intron	rna-XM_027463502.1
MED8	NC_040053.1	15779521	15781496	peak_9947	1976	+	PR_intron	rna-XM_027462518.1
LOC101793867	NC_040053.1	15843274	15843363	peak_9950	90	+	cds	rna-XM_027462458.1
MIGA1	NC_040053.1	16626357	16626507	peak_9959	151	+	utr3	rna-XM_013104264.3
GIPC2	NC_040053.1	16739539	16739690	peak_9965	152	+	cds	rna-XM_013104178.3
LOC101797537	NC_040053.1	19103827	19104007	peak_9974	181	+	PR_intron	rna-XM_021274331.2
RPF1	NC_040053.1	19124269	19125486	peak_9975	1218	+	PR_intron	rna-XM_027462665.1
