# Supplementary material for: Profiling Analysis of N6-Methyladenosine mRNA Methylation Reveals Differential m6A Patterns during the Embryonic Skeletal Muscle Development of Ducks
Source: Animals (Basel). 2022 Sep 28;12(19):2593. doi: 10.3390/ani12192593 (PMC9559603; doi:10.3390/ani12192593)
Supplement: Supplementary file 1 [file animals-12-02593-s001.zip › Table S4.xls]

Geneid	Chr	Start	End	PeakID	Length	Strand	Annotation	Annotated_Transcript
LIN7A	NC_040046.1	161023273	161023424	peak_1003	152	+	cds	rna-XM_027454141.1
SLC30A7	NC_040053.1	33237415	33237505	peak_10034	91	-	utr3	rna-XM_027462589.1
RTCA	NC_040053.1	33406454	33406902	peak_10035	449	-	PR_intron	rna-XM_027463041.1
RTCA	NC_040053.1	33408691	33410031	peak_10036	1341	-	PR_intron	rna-XM_027463041.1
LIN7A	NC_040046.1	161062444	161068396	peak_1004	5953	+	PR_intron	rna-XM_027454141.1
TECR	NC_040053.1	35349683	35349864	peak_10048	182	-	utr3	rna-XM_013106553.3
LOC113844510	NC_040054.1	2403566	2405071	peak_10096	1506	+	PR_intron	rna-XM_027464659.1
SERPINI1	NC_040054.1	4026526	4026587	peak_10097	62	+	utr3	rna-XM_027464266.1
GPR160	NC_040054.1	4806998	4807059	peak_10102	62	+	cds	rna-XM_027464261.1
LOC106018720	NC_040054.1	10254709	10254829	peak_10154	121	+	utr5	rna-XM_027464148.1
LOC101797999	NC_040054.1	12844337	12844516	peak_10168	180	+	cds	rna-XM_027464774.1
MELTF	NC_040054.1	13052178	13052388	peak_10174	211	+	utr3	rna-XM_005014348.4
PASK	NC_040054.1	14688315	14688376	peak_10195	62	+	cds	rna-XM_027464566.1
LOC101803343	NC_040054.1	16714768	16714859	peak_10228	92	+	utr5	rna-XM_027464570.1
SNORC	NC_040054.1	16875255	16875435	peak_10236	181	+	utr5	rna-XM_005029806.4
PLS1	NC_040054.1	24102906	24103086	peak_10281	181	+	cds	rna-XM_013109287.3
CAPS2	NC_040046.1	163509744	163509925	peak_1030	182	+	utr3	rna-XM_027455076.1
KCNC2	NC_040046.1	163614748	163617417	peak_1031	2670	+	PR_intron	rna-XM_027455117.1
767786dd-129f-4ad6-a090-734e5a0fbdbc	NC_040054.1	4362834	4362953	peak_10335	120	-	NP_exon	767786dd-129f-4ad6-a090-734e5a0fbdbc.trans
767786dd-129f-4ad6-a090-734e5a0fbdbc	NC_040054.1	4362836	4362957	peak_10336	122	-	NP_exon	767786dd-129f-4ad6-a090-734e5a0fbdbc.trans
ZMAT3	NC_040054.1	7369453	7369604	peak_10357	152	-	utr5	rna-XM_027464163.1
MCCC1	NC_040054.1	8678276	8678733	peak_10362	458	-	PR_intron	rna-XM_027464352.1
HRG	NC_040054.1	8924425	8924485	peak_10365	61	-	cds	rna-XM_027464447.1
LOC101799421	NC_040054.1	13809405	13809466	peak_10432	62	-	utr5	rna-XM_005014351.4
ANO7	NC_040054.1	14648831	14649041	peak_10449	211	-	utr3	rna-XM_027464127.1
75b9842b-5ba9-4f7f-a70a-f450c1d605f1	NC_040054.1	14700430	14700490	peak_10452	61	-	NP_exon	75b9842b-5ba9-4f7f-a70a-f450c1d605f1.trans
75b9842b-5ba9-4f7f-a70a-f450c1d605f1	NC_040054.1	14700435	14700496	peak_10453	62	-	NP_exon	75b9842b-5ba9-4f7f-a70a-f450c1d605f1.trans
AMIGO2	NC_040046.1	170193282	170193462	peak_1052	181	+	PR_intron	rna-XM_027456690.1
ADIPOQ	NC_040054.1	18141320	18141683	peak_10525	364	-	cds	rna-NM_001310788.1
FAM124B	NC_040054.1	21718575	21718814	peak_10544	240	-	utr3	rna-XM_027464421.1
FAM124B	NC_040054.1	21719111	21719320	peak_10545	210	-	utr3	rna-XM_027464421.1
LOC101794979	NC_040054.1	23994191	23994578	peak_10565	388	-	PR_intron	rna-XM_027463916.1
LOC101794979	NC_040054.1	24017461	24017676	peak_10566	216	-	PR_intron	rna-XM_027463916.1
ASB12	NC_040055.1	3743740	3743801	peak_10603	62	+	utr3	rna-XM_027465041.1
CHIC1	NC_040055.1	4237210	4237300	peak_10618	91	+	utr3	rna-XM_027465521.1
CAPN6	NC_040055.1	5491659	5491750	peak_10634	92	+	PR_intron	rna-XM_013095511.3
CAPN6	NC_040055.1	5544039	5544100	peak_10635	62	+	utr3	rna-XM_005015201.4
CD99L2	NC_040055.1	8152967	8153087	peak_10685	121	+	utr3	rna-XM_027465083.1
LOC101805009	NC_040055.1	8506261	8508092	peak_10686	1832	+	PR_intron	rna-XM_027465085.1
IDS	NC_040055.1	8540415	8540475	peak_10687	61	+	cds	rna-XM_027465226.1
C10HXorf65	NC_040055.1	11629470	11629683	peak_10704	214	+	PR_intron	rna-XM_027465148.1
PLS3	NC_040055.1	12357890	12360531	peak_10710	2642	+	PR_intron	rna-XM_021270271.2
LOC101792062	NC_040055.1	13793013	13793194	peak_10722	182	+	NP_exon	rna-XR_003499432.1
SLC9A6	NC_040055.1	13807151	13807272	peak_10723	122	+	utr5	rna-XM_027464991.1
NOX1	NC_040055.1	14917041	14917221	peak_10729	181	+	utr3	rna-XM_027465454.1
POF1B	NC_040055.1	18658464	18658614	peak_10738	151	+	cds	rna-XM_027465510.1
PTTG1	NC_040055.1	6310	6370	peak_10751	61	-	utr5	rna-XM_005009297.4
LSMEM1	NC_040046.1	174685481	174687130	peak_1078	1650	+	PR_intron	rna-XM_027457378.1
LOC113843665	NC_040046.1	175283070	175283160	peak_1079	91	+	cds	rna-XM_027457467.1
LOC101799932	NC_040055.1	6801480	6801570	peak_10836	91	-	utr3	rna-XM_027465288.1
ARHGAP36	NC_040055.1	6808248	6808458	peak_10837	211	-	utr3	rna-XM_021273165.2
ST7	NC_040046.1	176970672	176985715	peak_1091	15044	+	PR_intron	rna-XM_027457718.1
KLHL4	NC_040055.1	18074967	18075057	peak_10950	91	-	PR_intron	rna-XM_005011477.4
APOOL	NC_040055.1	18713453	18713603	peak_10957	151	-	NP_intron	rna-XR_003499452.1
LOC101797884	NC_040055.1	18733736	18733797	peak_10958	62	-	PR_intron	rna-XM_013092027.3
ING3	NC_040046.1	178589469	178591011	peak_1100	1543	+	PR_intron	rna-XM_027457867.1
ING3	NC_040046.1	178597156	178598392	peak_1101	1237	+	PR_intron	rna-XM_027457867.1
CILP	NC_040056.1	2952979	2953130	peak_11021	152	+	cds	rna-XM_027465767.1
KBTBD13	NC_040056.1	2982489	2982728	peak_11022	240	+	cds	rna-XM_027465769.1
KBTBD13	NC_040056.1	2984240	2984330	peak_11023	91	+	utr3	rna-XM_027465769.1
FANCI	NC_040056.1	8152056	8152301	peak_11069	246	+	cds	rna-XM_027465853.1
FSD2	NC_040056.1	10255909	10256418	peak_11096	510	+	cds	rna-XM_013106376.3
FSD2	NC_040056.1	10256588	10257837	peak_11097	1250	+	PR_intron	rna-XM_013106376.3
COMMD4	NC_040056.1	12754774	12754863	peak_11144	90	+	utr3	rna-XM_027466120.1
MLKL	NC_040056.1	17570653	17570884	peak_11209	232	+	PR_intron	rna-XM_005009070.4
CSNK2A2	NC_040056.1	19149914	19150182	peak_11243	269	+	PR_intron	rna-XM_027465708.1
ZNF319	NC_040056.1	19213563	19213774	peak_11244	212	+	utr3	rna-XM_005019943.4
CNGB1	NC_040056.1	19229333	19231910	peak_11245	2578	+	PR_intron	rna-XM_021272769.2
19770354-6a9e-4a17-b4b9-8ea2c4fde7a4	NC_040056.1	20261986	20262195	peak_11288	210	+	NP_exon	19770354-6a9e-4a17-b4b9-8ea2c4fde7a4.trans
19770354-6a9e-4a17-b4b9-8ea2c4fde7a4	NC_040056.1	20261921	20262192	peak_11289	272	+	NP_exon	19770354-6a9e-4a17-b4b9-8ea2c4fde7a4.trans
DPEP1	NC_040056.1	20607586	20607820	peak_11295	235	+	PR_intron	rna-XM_027466418.1
HEPHL1	NC_040046.1	10430586	10430706	peak_113	121	+	utr3	rna-XM_021267721.2
LOC101802648	NC_040046.1	187119324	187121959	peak_1133	2636	+	PR_intron	rna-XM_013103810.3
TMED3	NC_040056.1	416051	416351	peak_11350	301	-	cds	rna-XM_027465703.1
LOC106015065	NC_040056.1	678773	678834	peak_11355	62	-	cds	rna-XM_027466353.1
CLPX	NC_040056.1	3018825	3020361	peak_11380	1537	-	PR_intron	rna-XM_005025511.4
NTRK3	NC_040056.1	7678605	7678786	peak_11425	182	-	utr3	rna-XM_005017102.4
NTRK3	NC_040056.1	7681000	7681181	peak_11426	182	-	utr3	rna-XM_005017102.4
NTRK3	NC_040056.1	7681659	7681780	peak_11427	122	-	utr3	rna-XM_005017102.4
PLIN1	NC_040056.1	8298003	8298063	peak_11444	61	-	utr3	rna-NM_001310391.1
PLIN1	NC_040056.1	8298003	8298063	peak_11445	61	-	utr3	rna-NM_001310391.1
SLC26A5	NC_040046.1	189984259	189984410	peak_1145	152	+	utr3	rna-XM_027459447.1
GATM	NC_040056.1	10466421	10466481	peak_11473	61	-	utr5	rna-XM_027466131.1
FAN1	NC_040056.1	16291051	16291291	peak_11567	241	-	cds	rna-XM_027466186.1
LOC101797591	NC_040046.1	191709648	191709768	peak_1157	121	+	cds	rna-XM_021270347.2
CD36	NC_040046.1	191905599	191905780	peak_1158	182	+	utr3	rna-XM_027459773.1
BBS2	NC_040056.1	17315675	17318574	peak_11585	2900	-	PR_intron	rna-XM_027466645.1
COG4	NC_040056.1	17728941	17729355	peak_11592	415	-	utr5	rna-XM_027465683.1
TPPP3	NC_040056.1	18299937	18300338	peak_11603	402	-	PR_intron	rna-XM_027465964.1
MMP15	NC_040056.1	19197155	19197602	peak_11640	448	-	cds	rna-XM_027466715.1
MMP15	NC_040056.1	19197157	19197920	peak_11641	764	-	cds	rna-XM_027466715.1
KIAA0513	NC_040056.1	19469027	19469711	peak_11646	685	-	PR_intron	rna-XM_027466147.1
SLC22A31	NC_040056.1	20433199	20433289	peak_11673	91	-	cds	rna-XM_027466386.1
SLC22A31	NC_040056.1	20433797	20433946	peak_11674	150	-	cds	rna-XM_027466386.1
VPS9D1	NC_040056.1	20624192	20625016	peak_11682	825	-	PR_intron	rna-XM_027466412.1
TM2D3	NC_040057.1	21551	21642	peak_11702	92	+	cds	rna-XM_027467136.1
CMC2	NC_040057.1	7689258	7693755	peak_11771	4498	+	PR_intron	rna-XM_027466781.1
CMC2	NC_040057.1	7699692	7701373	peak_11772	1682	+	PR_intron	rna-XM_027466782.1
PHKB	NC_040057.1	16298023	16301841	peak_11814	3819	+	PR_intron	rna-XM_027466991.1
SMPD3	NC_040057.1	21091247	21091308	peak_11848	62	+	cds	rna-XM_021276493.2
SMPD3	NC_040057.1	21123087	21123207	peak_11849	121	+	utr3	rna-XM_021276493.2
MTHFSD	NC_040057.1	5440188	5440278	peak_11884	91	-	cds	rna-XM_027466835.1
MTHFSD	NC_040057.1	5449017	5449108	peak_11885	92	-	cds	rna-XM_027466835.1
LOC101796494	NC_040057.1	5803641	5804061	peak_11886	421	-	PR_intron	rna-XM_027466996.1
GAN	NC_040057.1	7539594	7539864	peak_11901	271	-	utr3	rna-XM_027467182.1
DYNLRB2	NC_040057.1	7945521	7945717	peak_11907	197	-	PR_intron	rna-XM_027466903.1
SNX20	NC_040057.1	17681813	17681874	peak_11961	62	-	cds	rna-XM_005021572.4
RPGRIP1L	NC_040057.1	19113622	19114554	peak_11967	933	-	PR_intron	rna-XM_027467159.1
PRMT7	NC_040057.1	21157700	21158180	peak_11972	481	-	PR_intron	rna-XM_027466859.1
NR2C2	NC_040058.1	164338	166914	peak_11980	2577	+	PR_intron	rna-XM_021267195.2
OXTR	NC_040058.1	747156	747306	peak_11998	151	+	cds	rna-XM_005012067.3
SSUH2	NC_040058.1	782892	782952	peak_11999	61	+	utr3	rna-XM_027467846.1
LOC106017218	NC_040058.1	2102089	2102210	peak_12002	122	+	cds	rna-XM_027467526.1
EIF4E3	NC_040058.1	4241903	4245070	peak_12011	3168	+	PR_intron	rna-XM_013091797.3
PDHB	NC_040058.1	9153844	9154014	peak_12044	171	+	PR_intron	rna-XM_027468037.1
TMEM209	NC_040046.1	201727565	201727751	peak_1207	187	+	PR_intron	rna-XM_027461586.1
e7bb50bc-fcf9-4091-9232-ba712214c2fa	NC_040058.1	11983522	11983642	peak_12078	121	+	NP_exon	e7bb50bc-fcf9-4091-9232-ba712214c2fa.trans
e7bb50bc-fcf9-4091-9232-ba712214c2fa	NC_040058.1	11983462	11983643	peak_12079	182	+	NP_exon	e7bb50bc-fcf9-4091-9232-ba712214c2fa.trans
LOC113845046	NC_040058.1	13006435	13006526	peak_12084	92	+	NP_exon	rna-XR_003500259.1
STAB1	NC_040058.1	16964389	16965192	peak_12116	804	+	PR_intron	rna-XM_027467286.1
DOCK3	NC_040058.1	18472637	18472697	peak_12129	61	+	utr3	rna-XM_027467457.1
SLC38A3	NC_040058.1	18485969	18486090	peak_12130	122	+	utr3	rna-XM_027467507.1
SLC38A3	NC_040058.1	18486179	18486329	peak_12131	151	+	utr3	rna-XM_027467507.1
LOC113845098	NC_040058.1	18555655	18556020	peak_12133	366	+	PR_intron	rna-XM_027467921.1
c6ab9e5e-e050-4f48-94db-f2637de9a67f	NC_040058.1	19471432	19472002	peak_12167	571	+	NP_exon	c6ab9e5e-e050-4f48-94db-f2637de9a67f.trans
c6ab9e5e-e050-4f48-94db-f2637de9a67f	NC_040058.1	19471436	19472005	peak_12169	570	+	NP_exon	c6ab9e5e-e050-4f48-94db-f2637de9a67f.trans
MTMR14	NC_040058.1	21912522	21912701	peak_12202	180	+	cds	rna-XM_027467349.1
CCDC36	NC_040058.1	21999019	21999229	peak_12207	211	+	cds	rna-XM_013097406.3
C13H3orf14	NC_040058.1	7726557	7727241	peak_12250	685	-	PR_intron	rna-XM_013091965.3
LOC113845077	NC_040058.1	9669054	9669173	peak_12260	120	-	cds	rna-XM_027467849.1
PPARG	NC_040058.1	13870606	13874884	peak_12279	4279	-	PR_intron	rna-NM_001310398.1
GLYCTK	NC_040058.1	18717696	18717757	peak_12349	62	-	PR_intron	rna-XM_027467786.1
DENND6A	NC_040058.1	18912998	18913149	peak_12352	152	-	utr3	rna-XM_027467413.1
ABTB1	NC_040058.1	19983389	19985332	peak_12360	1944	-	PR_intron	rna-XM_027467514.1
ABTB1	NC_040058.1	20010082	20010173	peak_12361	92	-	utr5	rna-XM_027467514.1
IMPDH2	NC_040058.1	22016903	22016964	peak_12397	62	-	utr5	rna-XM_027467880.1
ART5	NC_040046.1	55013	55193	peak_1241	181	-	utr3	rna-XM_027465441.1
LARS	NC_040059.1	2387513	2388250	peak_12422	738	+	PR_intron	rna-XM_027468131.1
LARS	NC_040059.1	2403994	2404055	peak_12423	62	+	cds	rna-XM_027468131.1
2313131c-0cd3-4f31-ad80-6e75e1c316e0	NC_040059.1	6902040	6902131	peak_12496	92	+	NP_exon	2313131c-0cd3-4f31-ad80-6e75e1c316e0.trans
2313131c-0cd3-4f31-ad80-6e75e1c316e0	NC_040059.1	6902043	6902133	peak_12497	91	+	NP_exon	2313131c-0cd3-4f31-ad80-6e75e1c316e0.trans
SLC6A7	NC_040059.1	7608715	7608866	peak_12510	152	+	utr3	rna-XM_027468258.1
SLC6A7	NC_040059.1	7611319	7611470	peak_12511	152	+	utr3	rna-XM_027468258.1
GPX3	NC_040059.1	7843002	7843091	peak_12519	90	+	utr3	rna-XM_027468347.1
UBLCP1	NC_040059.1	10486232	10486323	peak_12547	92	+	cds	rna-XM_027468229.1
LOC101802707	NC_040059.1	10645899	10646048	peak_12549	150	+	cds	rna-XM_027468702.1
PRELID1	NC_040059.1	10887660	10888224	peak_12568	565	+	PR_intron	rna-XM_027468614.1
LOC101801690	NC_040059.1	13474910	13475120	peak_12598	211	+	utr3	rna-XM_027468321.1
PAAF1	NC_040046.1	1270678	1270886	peak_1260	209	-	utr3	rna-XM_027462183.1
7c8f71af-b1a6-4ef3-a238-1b3caab07e69	NC_040059.1	13994152	13994271	peak_12620	120	+	NP_exon	7c8f71af-b1a6-4ef3-a238-1b3caab07e69.trans
7c8f71af-b1a6-4ef3-a238-1b3caab07e69	NC_040059.1	13994151	13994271	peak_12621	121	+	NP_exon	7c8f71af-b1a6-4ef3-a238-1b3caab07e69.trans
SAR1B	NC_040059.1	4825187	4826087	peak_12689	901	-	PR_intron	rna-XM_027468729.1
SMIM32	NC_040059.1	5553539	5553660	peak_12693	122	-	cds	rna-XM_027468157.1
NME5	NC_040059.1	6399275	6400247	peak_12698	973	-	PR_intron	rna-XM_027468488.1
THOC3	NC_040059.1	10678207	10678267	peak_12758	61	-	utr3	rna-XM_027468712.1
RNF44	NC_040059.1	10734279	10734862	peak_12763	584	-	cds	rna-XM_027468237.1
NDUFA2	NC_040059.1	13427038	13427096	peak_12807	59	-	utr5	rna-XM_027468375.1
STARD10	NC_040059.1	14021205	14021386	peak_12815	182	-	utr5	rna-XM_027468336.1
GAB2	NC_040046.1	3333751	3333930	peak_1288	180	-	utr3	rna-XM_027466767.1
ff9398e2-865f-4462-98f0-03a9d1c398e7	NC_040060.1	2924858	2925067	peak_12884	210	+	NP_exon	ff9398e2-865f-4462-98f0-03a9d1c398e7.trans
ATPAF2	NC_040060.1	3001635	3001754	peak_12887	120	+	cds	rna-XM_027469437.1
ATPAF2	NC_040060.1	3001632	3001692	peak_12888	61	+	cds	rna-XM_027469437.1
MAP2K3	NC_040060.1	3540999	3541179	peak_12897	181	+	utr3	rna-XM_027469025.1
LOC110352834	NC_040060.1	3948435	3948584	peak_12918	150	+	utr5	rna-XM_027469440.1
RADIL	NC_040060.1	4086658	4086749	peak_12930	92	+	PR_intron	rna-XM_027469487.1
TMEM184A	NC_040060.1	5671921	5672158	peak_12946	238	+	cds	rna-XM_027469255.1
TMEM184A	NC_040060.1	5672454	5672604	peak_12947	151	+	cds	rna-XM_027469255.1
TMEM184A	NC_040060.1	5672663	5672753	peak_12948	91	+	utr3	rna-XM_027469255.1
LOC113845291	NC_040060.1	5699031	5699122	peak_12950	92	+	utr3	rna-XM_027469443.1
LOC113845291	NC_040060.1	5699002	5699122	peak_12951	121	+	utr3	rna-XM_027469443.1
BAIAP2L1	NC_040060.1	7436107	7436562	peak_12963	456	+	PR_intron	rna-XM_005020048.4
SYT17	NC_040060.1	8803240	8803331	peak_12994	92	+	cds	rna-XM_027468960.1
SYT17	NC_040060.1	8828118	8828358	peak_12995	241	+	utr3	rna-XM_027468960.1
MRPL28	NC_040060.1	11165275	11165454	peak_13025	180	+	utr3	rna-XM_027468996.1
JPT2	NC_040060.1	13590380	13590500	peak_13085	121	+	utr3	rna-XM_027469075.1
LOC101789505	NC_040046.1	8331296	8331416	peak_1309	121	-	cds	rna-XM_005029571.4
LOC101790444	NC_040046.1	8371834	8372015	peak_1310	182	-	cds	rna-XM_027467210.1
LOC101797312	NC_040060.1	1758379	1758500	peak_13135	122	-	cds	rna-XM_027469143.1
LOC101797262	NC_040060.1	1941589	1941799	peak_13141	211	-	utr3	rna-XM_027469158.1
MYO15A	NC_040060.1	2975687	2975808	peak_13156	122	-	cds	rna-XM_027469436.1
NUDT1	NC_040060.1	5146895	5147014	peak_13200	120	-	cds	rna-XM_027469052.1
NUDT1	NC_040060.1	5147495	5147584	peak_13201	90	-	utr5	rna-XM_027469052.1
NPTX2	NC_040060.1	7353098	7353188	peak_13220	91	-	cds	rna-XM_027469281.1
BHLHA15	NC_040060.1	7494737	7494826	peak_13221	90	-	cds	rna-XM_021272792.1
6cb7ed6c-ee09-41be-b3e3-e5ad552b941a	NC_040060.1	7965787	7965848	peak_13242	62	-	NP_exon	6cb7ed6c-ee09-41be-b3e3-e5ad552b941a.trans
LOC110352536	NC_040060.1	8010984	8011165	peak_13244	182	-	utr3	rna-XM_027469445.1
REXO5	NC_040060.1	8286432	8287659	peak_13248	1228	-	PR_intron	rna-XM_027469482.1
LOC101793832	NC_040060.1	8300907	8302447	peak_13249	1541	-	PR_intron	rna-XM_005018505.4
PDIA2	NC_040060.1	11277947	11278126	peak_13278	180	-	cds	rna-XM_027468902.1
TRPC6	NC_040046.1	13337036	13337097	peak_1329	62	-	cds	rna-XM_027467875.1
FBXL16	NC_040060.1	12380387	12380568	peak_13318	182	-	utr5	rna-XM_027469389.1
TVP23A	NC_040060.1	17013902	17014109	peak_13354	208	-	utr5	rna-XM_027469524.1
KBTBD3	NC_040046.1	15329872	15329992	peak_1338	121	-	cds	rna-XM_027468259.1
SERPIND1	NC_040061.1	5642899	5643168	peak_13428	270	+	cds	rna-XM_005021164.4
LOC101797313	NC_040061.1	6035378	6035588	peak_13435	211	+	cds	rna-XM_027470093.1
LOC101797313	NC_040061.1	6037581	6037671	peak_13436	91	+	utr3	rna-XM_027470093.1
e548dd93-46a2-4b09-b454-4ead754ffe5c	NC_040046.1	16163348	16163766	peak_135	419	+	NP_exon	e548dd93-46a2-4b09-b454-4ead754ffe5c.trans
LOC101789528	NC_040061.1	10720065	10720217	peak_13506	153	+	PR_intron	rna-XM_027469985.1
P2RX6	NC_040061.1	10791589	10791709	peak_13508	121	+	utr3	rna-XM_027469619.1
LOC101791038	NC_040061.1	10989631	10990638	peak_13513	1008	+	PR_intron	rna-XM_027470227.1
RILPL2	NC_040061.1	11580482	11581365	peak_13527	884	+	PR_intron	rna-XM_027470235.1
TMEM120B	NC_040061.1	12291992	12292083	peak_13541	92	+	utr3	rna-XM_027469681.1
KNTC1	NC_040061.1	12610566	12611086	peak_13560	521	+	PR_intron	rna-XM_027470220.1
GP1BB	NC_040061.1	4841654	4841715	peak_13590	62	-	utr3	rna-XM_027470244.1
LOC101803251	NC_040061.1	4932068	4932128	peak_13592	61	-	utr5	rna-XM_027470243.1
MAPK1	NC_040061.1	5161351	5161411	peak_13597	61	-	PR_intron	rna-XM_027469614.1
MAPK1	NC_040061.1	5161339	5161399	peak_13598	61	-	PR_intron	rna-XM_027469614.1
e548dd93-46a2-4b09-b454-4ead754ffe5c	NC_040046.1	16163251	16163760	peak_136	510	+	NP_exon	e548dd93-46a2-4b09-b454-4ead754ffe5c.trans
SKA3	NC_040046.1	18128079	18128260	peak_1365	182	-	utr3	rna-XM_027469037.1
TESC	NC_040061.1	9420540	9420660	peak_13687	121	-	cds	rna-XM_027469802.1
RNF215	NC_040061.1	9932279	9932649	peak_13706	371	-	cds	rna-XM_027470210.1
DNAH10	NC_040061.1	11478395	11479036	peak_13726	642	-	PR_intron	rna-XM_027470214.1
OGFOD2	NC_040061.1	11837665	11837946	peak_13736	282	-	PR_intron	rna-XM_027469741.1
LOC101799700	NC_040062.1	595406	595556	peak_13783	151	+	utr3	rna-XM_027470459.1
LOC101800522	NC_040062.1	608105	608286	peak_13784	182	+	utr3	rna-XM_027470456.1
88058c52-9355-4b09-b948-28a25d275207	NC_040062.1	810682	810773	peak_13785	92	+	NP_exon	88058c52-9355-4b09-b948-28a25d275207.trans
88058c52-9355-4b09-b948-28a25d275207	NC_040062.1	811101	811221	peak_13786	121	+	NP_exon	88058c52-9355-4b09-b948-28a25d275207.trans
88058c52-9355-4b09-b948-28a25d275207	NC_040062.1	810682	810773	peak_13787	92	+	NP_exon	88058c52-9355-4b09-b948-28a25d275207.trans
88058c52-9355-4b09-b948-28a25d275207	NC_040062.1	811101	811221	peak_13788	121	+	NP_exon	88058c52-9355-4b09-b948-28a25d275207.trans
LOC101790919	NC_040062.1	871811	872021	peak_13789	211	+	cds	rna-XM_027470489.1
LOC101792441	NC_040062.1	954190	954251	peak_13791	62	+	cds	rna-XM_027470479.1
LOC101792441	NC_040062.1	954098	954277	peak_13793	180	+	cds	rna-XM_027470479.1
LOC101803633	NC_040062.1	115733	116107	peak_13802	375	-	PR_intron	rna-XM_027470527.1
053c2f21-499a-4a99-8b08-c6a75d2340ab	NC_040062.1	856930	857411	peak_13817	482	-	NP_exon	053c2f21-499a-4a99-8b08-c6a75d2340ab.trans
LOC113845379	NC_040062.1	1175503	1175594	peak_13824	92	-	PR_intron	rna-XM_027470350.1
FUT7	NC_040063.1	316104	316253	peak_13832	150	+	cds	rna-XM_005014795.4
LOC101795574	NC_040063.1	879735	879825	peak_13836	91	+	utr3	rna-XM_027470990.1
USP12	NC_040046.1	20386028	20386178	peak_1384	151	-	utr3	rna-XM_027469559.1
FAM166A	NC_040063.1	2004381	2006403	peak_13862	2023	+	PR_intron	rna-XM_021277545.2
NELFB	NC_040063.1	2044329	2045151	peak_13863	823	+	PR_intron	rna-XM_027470939.1
SLC46A3	NC_040046.1	21004320	21004410	peak_1390	91	-	cds	rna-XM_027469740.1
SLC46A3	NC_040046.1	21010553	21010674	peak_1391	122	-	utr5	rna-XM_027469740.1
QRFP	NC_040063.1	7426199	7426290	peak_13949	92	+	utr3	rna-XM_027471159.1
PTGES	NC_040063.1	7860562	7860713	peak_13957	152	+	utr3	rna-XM_027471204.1
KYAT1	NC_040063.1	8190349	8190469	peak_13966	121	+	utr3	rna-XM_005013191.4
ZER1	NC_040063.1	8228917	8229037	peak_13969	121	+	utr3	rna-XM_027470870.1
PTGS1	NC_040063.1	9771248	9771339	peak_14020	92	+	utr3	rna-XM_027470913.1
SLC2A8	NC_040063.1	11695744	11695804	peak_14039	61	+	cds	rna-XM_005024001.3
LOC101803957	NC_040063.1	8750	8840	peak_14040	91	-	utr3	rna-XM_005014821.4
CLIC3	NC_040063.1	264306	264367	peak_14041	62	-	utr5	rna-XM_005014804.4
ST6GALNAC6	NC_040063.1	5241228	5241318	peak_14098	91	-	utr5	rna-XM_027470829.1
FAM102A	NC_040063.1	5257964	5258055	peak_14099	92	-	utr3	rna-XM_005017870.4
TTC16	NC_040063.1	5375000	5375151	peak_14106	152	-	utr5	rna-XM_027471143.1
PRRT1B	NC_040063.1	7199493	7199667	peak_14141	175	-	utr3	rna-XM_027471088.1
PRRT1B	NC_040063.1	7199498	7199648	peak_14142	151	-	utr3	rna-XM_027471088.1
EXOSC2	NC_040063.1	7504448	7504539	peak_14162	92	-	cds	rna-XM_005013293.4
KCNT1	NC_040063.1	9130680	9130891	peak_14211	212	-	utr3	rna-XM_027471179.1
KCNT1	NC_040063.1	9131160	9131470	peak_14212	311	-	cds	rna-XM_027471178.1
RALGPS1	NC_040063.1	11572935	11573745	peak_14242	811	-	PR_intron	rna-XM_027471131.1
RALGPS1	NC_040063.1	11583464	11584214	peak_14243	751	-	PR_intron	rna-XM_027471131.1
RALGPS1	NC_040063.1	11593782	11593903	peak_14244	122	-	PR_intron	rna-XM_027471131.1
NDUFAF8	NC_040064.1	156521	156581	peak_14249	61	+	utr3	rna-XM_027471324.1
ZNF207	NC_040064.1	1228446	1228566	peak_14275	121	+	cds	rna-XM_027471636.1
LOC106016586	NC_040064.1	2374324	2375294	peak_14285	971	+	PR_intron	rna-XM_027471275.1
LOC101794119	NC_040046.1	26445499	26446668	peak_1430	1170	-	PR_intron	rna-XM_005014850.4
GALR2	NC_040064.1	3351809	3351869	peak_14309	61	+	utr3	rna-XM_027471376.1
LOC101794119	NC_040046.1	26455217	26457355	peak_1431	2139	-	PR_intron	rna-XM_005014850.4
188da368-2b0e-4e1b-8753-4c0aa1b5901c	NC_040064.1	3375716	3375836	peak_14312	121	+	NP_exon	188da368-2b0e-4e1b-8753-4c0aa1b5901c.trans
188da368-2b0e-4e1b-8753-4c0aa1b5901c	NC_040064.1	3375715	3375835	peak_14313	121	+	NP_exon	188da368-2b0e-4e1b-8753-4c0aa1b5901c.trans
WBP2	NC_040064.1	3482417	3484134	peak_14324	1718	+	PR_intron	rna-XM_027471294.1
GALK1	NC_040064.1	3572696	3573212	peak_14325	517	+	PR_intron	rna-XM_027471306.1
ATP5PD	NC_040064.1	4096500	4096560	peak_14348	61	+	cds	rna-XM_027471379.1
FADS6	NC_040064.1	4214272	4214392	peak_14351	121	+	cds	rna-XM_021267141.2
PIK3R6	NC_040064.1	5507286	5507467	peak_14362	182	+	utr3	rna-XM_027471385.1
PIK3R6	NC_040064.1	5507855	5508035	peak_14363	181	+	utr3	rna-XM_027471385.1
RNASEH2B	NC_040046.1	26991413	26993502	peak_1441	2090	-	PR_intron	rna-XM_027471271.1
TK1	NC_040064.1	236581	236957	peak_14428	377	-	cds	rna-XM_027471608.1
SOCS3	NC_040064.1	275303	275451	peak_14429	149	-	utr3	rna-XM_005031814.3
SOCS3	NC_040064.1	275302	275450	peak_14430	149	-	utr3	rna-XM_005031814.3
LOC101800860	NC_040064.1	1254095	1254156	peak_14453	62	-	cds	rna-XM_005012284.4
PECAM1	NC_040064.1	1389400	1390276	peak_14460	877	-	PR_intron	rna-XM_005012299.4
POLG2	NC_040064.1	1411253	1411494	peak_14461	242	-	utr5	rna-XM_027471653.1
B3GNTL1	NC_040064.1	1803015	1803196	peak_14467	182	-	PR_intron	rna-XM_027471563.1
808d0abb-e1e7-4a27-b72c-ff1ca095462c	NC_040064.1	3005485	3005665	peak_14479	181	-	NP_exon	808d0abb-e1e7-4a27-b72c-ff1ca095462c.trans
808d0abb-e1e7-4a27-b72c-ff1ca095462c	NC_040064.1	3005470	3005681	peak_14480	212	-	NP_exon	808d0abb-e1e7-4a27-b72c-ff1ca095462c.trans
CDADC1	NC_040046.1	27752610	27752761	peak_1449	152	-	cds	rna-XM_027471525.1
CDADC1	NC_040046.1	27758360	27758481	peak_1450	122	-	cds	rna-XM_027471525.1
SLC16A5	NC_040064.1	4072417	4074153	peak_14503	1737	-	PR_intron	rna-XM_027471719.1
CACNG1	NC_040064.1	9359413	9359532	peak_14557	120	-	utr5	rna-XM_005016095.4
C1H11orf87	NC_040046.1	16731867	16731958	peak_146	92	+	utr3	rna-XM_027468575.1
LOC101790341	NC_040065.1	1353385	1353476	peak_14606	92	+	utr3	rna-XM_027472300.1
LOC101804743	NC_040065.1	1664244	1664304	peak_14610	61	+	cds	rna-XM_027472648.1
LOC106015769	NC_040065.1	1924961	1925021	peak_14621	61	+	cds	rna-XM_013095901.3
NMRK2	NC_040065.1	2310736	2310856	peak_14625	121	+	utr5	rna-XM_005018675.4
AP1M1	NC_040065.1	3116487	3116547	peak_14644	61	+	utr5	rna-XM_005029090.3
TMEM38A	NC_040065.1	3273133	3273224	peak_14648	92	+	utr3	rna-XM_027472016.1
F2RL3	NC_040065.1	3307087	3307178	peak_14654	92	+	utr5	rna-XM_013108167.3
LACC1	NC_040046.1	29627818	29628207	peak_1466	390	-	utr3	rna-XM_021275443.2
GAMT	NC_040065.1	4543837	4544015	peak_14715	179	+	utr3	rna-XM_027472604.1
CNN2	NC_040065.1	4812425	4812485	peak_14723	61	+	utr3	rna-XM_027472534.1
TEKT1	NC_040065.1	5379082	5379584	peak_14752	503	+	PR_intron	rna-XM_021273415.2
MYO19	NC_040065.1	7526296	7526477	peak_14792	182	+	utr3	rna-XM_013094607.3
LOC101796868	NC_040065.1	7555129	7555249	peak_14793	121	+	PR_intron	rna-XM_027471751.1
C1H11orf87	NC_040046.1	16731869	16731959	peak_148	91	+	utr3	rna-XM_027468575.1
CTNS	NC_040065.1	9301147	9301207	peak_14809	61	+	utr3	rna-XM_013102990.2
SLC6A4	NC_040065.1	9824455	9824665	peak_14832	211	+	cds	rna-XM_005023142.4
SLC6A4	NC_040065.1	9836978	9837158	peak_14833	181	+	utr3	rna-XM_005023142.4
ABHD15	NC_040065.1	10012440	10012618	peak_14841	179	+	cds	rna-XM_027471831.1
RILP	NC_040065.1	10873675	10874224	peak_14885	550	+	cds	rna-XM_027472123.1
PITPNA	NC_040065.1	10941223	10943147	peak_14894	1925	+	PR_intron	rna-XM_027472127.1
MYO1C	NC_040065.1	11026077	11026168	peak_14896	92	+	utr3	rna-XM_005025010.4
MYO1F	NC_040065.1	249407	249468	peak_14930	62	-	utr3	rna-XM_027471799.1
AMH	NC_040065.1	526587	526947	peak_14935	361	-	utr3	rna-NM_001310362.1
AMH	NC_040065.1	526587	526947	peak_14936	361	-	utr3	rna-NM_001310362.1
CD320	NC_040065.1	1521960	1522021	peak_14961	62	-	utr3	rna-XM_027471932.1
EDNRB	NC_040046.1	43366443	43366792	peak_1498	350	-	PR_intron	rna-XM_027442901.1
TICAM1	NC_040065.1	2574515	2574666	peak_14990	152	-	cds	rna-NM_001310791.1
TICAM1	NC_040065.1	2575621	2575682	peak_14991	62	-	cds	rna-NM_001310791.1
TICAM1	NC_040065.1	2574516	2574637	peak_14992	122	-	cds	rna-NM_001310791.1
TICAM1	NC_040065.1	2575621	2575682	peak_14993	62	-	cds	rna-NM_001310791.1
COPE	NC_040065.1	3967521	3967640	peak_15018	120	-	cds	rna-XM_027472423.1
LOC101804326	NC_040065.1	5154021	5154519	peak_15071	499	-	PR_intron	rna-XM_027472556.1
NLK	NC_040065.1	6212499	6212619	peak_15087	121	-	utr5	rna-XM_027471965.1
VMP1	NC_040065.1	8499534	8499624	peak_15135	91	-	PR_intron	rna-XM_027471793.1
VMP1	NC_040065.1	8504191	8504281	peak_15136	91	-	utr5	rna-XM_027471793.1
LOC101792386	NC_040065.1	9066772	9066833	peak_15164	62	-	utr5	rna-XM_027472684.1
PARP4	NC_040046.1	17440664	17440754	peak_152	91	+	cds	rna-XM_005014589.4
LOC113845623	NC_040065.1	10309985	10310356	peak_15203	372	-	PR_intron	rna-XM_027472188.1
RPL23A	NC_040065.1	10317013	10317072	peak_15204	60	-	utr3	rna-XM_027472234.1
5875db8b-929a-4e04-b2fa-1cbc27d0d687	NC_040065.1	10765241	10765417	peak_15213	177	-	NP_exon	5875db8b-929a-4e04-b2fa-1cbc27d0d687.trans
5875db8b-929a-4e04-b2fa-1cbc27d0d687	NC_040065.1	10765234	10765355	peak_15214	122	-	NP_exon	5875db8b-929a-4e04-b2fa-1cbc27d0d687.trans
RAD51D	NC_040065.1	11856438	11856659	peak_15240	222	-	PR_intron	rna-XM_027471783.1
SH2B2	NC_040065.1	12279206	12279476	peak_15254	271	-	cds	rna-XM_027472607.1
LOC101796159	NC_040066.1	1952497	1952884	peak_15284	388	+	utr3	rna-XM_005016349.3
KCNK15	NC_040066.1	1964194	1964315	peak_15285	122	+	utr3	rna-XM_027472898.1
RBPJL	NC_040066.1	2165765	2165886	peak_15288	122	+	cds	rna-XM_027473343.1
LOC101805309	NC_040066.1	4925071	4925132	peak_15317	62	+	cds	rna-XM_027472991.1
LOC101805309	NC_040066.1	4925547	4925607	peak_15318	61	+	utr3	rna-XM_027472991.1
MMP24	NC_040066.1	6106118	6106326	peak_15319	209	+	cds	rna-XM_027442862.1
MMP24	NC_040066.1	6108589	6108739	peak_15320	151	+	cds	rna-XM_027442862.1
RBL1	NC_040066.1	6855602	6855693	peak_15350	92	+	cds	rna-XM_027442809.1
RAB22A	NC_040066.1	10577194	10577255	peak_15384	62	+	utr3	rna-XM_027473099.1
41c1c4a7-0f97-42e5-b29a-adf16435d935	NC_040066.1	14621127	14621248	peak_15444	122	+	NP_exon	41c1c4a7-0f97-42e5-b29a-adf16435d935.trans
41c1c4a7-0f97-42e5-b29a-adf16435d935	NC_040066.1	14621101	14621251	peak_15445	151	+	NP_exon	41c1c4a7-0f97-42e5-b29a-adf16435d935.trans
MYLK2	NC_040066.1	14935066	14935995	peak_15454	930	+	cds	rna-XM_027442891.1
LOC101793871	NC_040066.1	15263177	15263415	peak_15474	239	+	cds	rna-XM_027472747.1
LOC101793871	NC_040066.1	15263473	15263534	peak_15475	62	+	cds	rna-XM_027472747.1
PCID2	NC_040046.1	61109497	61109702	peak_1549	206	-	utr3	rna-XM_027444412.1
PCID2	NC_040046.1	61109498	61109706	peak_1551	209	-	utr3	rna-XM_027444412.1
GRTP1	NC_040046.1	61203053	61203143	peak_1553	91	-	cds	rna-XM_027444472.1
RIMS4	NC_040066.1	1970901	1971022	peak_15537	122	-	utr3	rna-XM_027472899.1
NFS1	NC_040066.1	6411779	6413545	peak_15586	1767	-	PR_intron	rna-XM_027442905.1
GCNT7	NC_040066.1	9636592	9636713	peak_15625	122	-	utr3	rna-XM_005010410.4
LOC101793813	NC_040066.1	10097331	10097392	peak_15627	62	-	NP_intron	rna-XR_003501471.1
KCNQ2	NC_040066.1	13666391	13666571	peak_15659	181	-	cds	rna-XM_027473055.1
LOC113839660	NC_040066.1	14779176	14779266	peak_15680	91	-	utr3	rna-XM_027442887.1
FOXS1	NC_040066.1	14947458	14947578	peak_15693	121	-	cds	rna-XM_027472779.1
LOC113845719	NC_040066.1	15526046	15526167	peak_15708	122	-	cds	rna-XM_027472790.1
LOC113845719	NC_040066.1	15526703	15526943	peak_15709	241	-	cds	rna-XM_027472790.1
DDOST	NC_040067.1	763037	763218	peak_15745	182	+	utr3	rna-XM_027443143.1
HTR6	NC_040067.1	2070369	2070518	peak_15787	150	+	cds	rna-XM_027443019.1
LOC101804741	NC_040067.1	4335330	4335420	peak_15824	91	+	utr3	rna-XM_005015431.4
KLHL21	NC_040067.1	6386957	6387404	peak_15865	448	+	utr3	rna-XM_005030164.4
KLHL21	NC_040067.1	6386987	6387405	peak_15867	419	+	utr3	rna-XM_005030164.4
TTC34	NC_040067.1	7503028	7503089	peak_15884	62	+	cds	rna-XM_013091671.3
IL17D	NC_040046.1	17932937	17932997	peak_159	61	+	utr3	rna-XM_027468994.1
LOC101798236	NC_040046.1	62934218	62934488	peak_1590	271	-	cds	rna-XM_005012450.4
MFN2	NC_040067.1	2927462	2927523	peak_15960	62	-	utr5	rna-XM_027443330.1
CLCN6	NC_040067.1	3025964	3026688	peak_15963	725	-	PR_intron	rna-XM_027443022.1
DRAXIN	NC_040067.1	3073764	3073913	peak_15964	150	-	utr3	rna-XM_027443083.1
TMEM88B	NC_040067.1	4549663	4549813	peak_16004	151	-	utr5	rna-XM_027443244.1
MRPS16	NC_040067.1	6014339	6014398	peak_16026	60	-	utr3	rna-XM_027443422.1
RNF207	NC_040067.1	6461949	6462009	peak_16039	61	-	utr3	rna-XM_027443374.1
DFFB	NC_040067.1	6838048	6838138	peak_16041	91	-	utr3	rna-XM_027443410.1
CPNE5	NC_040068.1	14183	14274	peak_16058	92	+	cds	rna-XM_027443572.1
PPP3CC	NC_040068.1	473238	473388	peak_16079	151	+	utr3	rna-XM_027443560.1
DOK2	NC_040068.1	561640	561790	peak_16080	151	+	cds	rna-XM_027443484.1
UNC5D	NC_040068.1	1184961	1185052	peak_16087	92	+	cds	rna-XM_027443553.1
UNC5D	NC_040068.1	1190598	1190749	peak_16088	152	+	utr3	rna-XM_027443553.1
PSRC1	NC_040068.1	9771	10142	peak_16121	372	-	PR_intron	rna-XM_027443568.1
aa92c688-03fa-4719-9c3c-60191e05cbcc	NC_040068.1	24172	24263	peak_16122	92	-	NP_exon	aa92c688-03fa-4719-9c3c-60191e05cbcc.trans
aa92c688-03fa-4719-9c3c-60191e05cbcc	NC_040068.1	24172	24370	peak_16123	199	-	NP_exon	aa92c688-03fa-4719-9c3c-60191e05cbcc.trans
90f94d91-05c3-431c-affe-ba3ffa853938	NC_040069.1	443493	443583	peak_16190	91	+	NP_exon	90f94d91-05c3-431c-affe-ba3ffa853938.trans
90f94d91-05c3-431c-affe-ba3ffa853938	NC_040069.1	443495	443583	peak_16191	89	+	NP_exon	90f94d91-05c3-431c-affe-ba3ffa853938.trans
ZC3H12A	NC_040069.1	1892355	1892415	peak_16213	61	+	utr5	rna-XM_027444049.1
ZDHHC18	NC_040069.1	2877640	2878129	peak_16233	490	+	PR_intron	rna-XM_027443898.1
GPR3	NC_040069.1	3070452	3070572	peak_16239	121	+	cds	rna-XM_027443963.1
PAQR7	NC_040069.1	2571873	2572053	peak_16349	181	-	cds	rna-XM_027443844.1
FABP3	NC_040069.1	4719356	4719415	peak_16390	60	-	utr5	rna-XM_027443958.1
PANX3	NC_040070.1	71681	71772	peak_16407	92	+	cds	rna-XM_005021093.4
LOC101801269	NC_040070.1	139716	139776	peak_16408	61	+	cds	rna-XM_027444237.1
TIRAP	NC_040070.1	443750	443931	peak_16414	182	+	utr3	rna-XM_013099617.3
KCNJ5	NC_040070.1	1290992	1291082	peak_16422	91	+	utr5	rna-XM_013099629.3
KCNJ5	NC_040070.1	1310832	1311071	peak_16423	240	+	cds	rna-XM_013099629.3
LOC101802115	NC_040070.1	4218330	4218481	peak_16459	152	+	cds	rna-XM_027444217.1
GRIK4	NC_040070.1	4479012	4479103	peak_16467	92	+	cds	rna-XM_027444301.1
GRIK4	NC_040070.1	4479968	4480059	peak_16468	92	+	utr3	rna-XM_027444301.1
TECTA	NC_040070.1	4539453	4539544	peak_16472	92	+	utr3	rna-XM_027444323.1
SORL1	NC_040070.1	4583258	4583573	peak_16474	316	+	PR_intron	rna-XM_027444129.1
SCN4B	NC_040070.1	6787448	6787509	peak_16502	62	+	utr3	rna-XM_027444181.1
SMIM35	NC_040070.1	6802294	6802385	peak_16503	92	+	NP_exon	rna-XR_003492433.1
SMIM35	NC_040070.1	6803520	6803611	peak_16504	92	+	NP_exon	rna-XR_003492433.1
ALG9	NC_040070.1	7472288	7472496	peak_16507	209	+	utr5	rna-XM_027444252.1
P2RY8	NC_040046.1	69677548	69677699	peak_1654	152	-	utr3	rna-XM_027447191.1
P2RY8	NC_040046.1	69681227	69681318	peak_1655	92	-	utr3	rna-XM_027447191.1
USP2	NC_040070.1	3771514	3771812	peak_16557	299	-	cds	rna-XM_027444275.1
P2RY8	NC_040046.1	69683261	69683352	peak_1656	92	-	utr3	rna-XM_027447191.1
ZBTB16	NC_040070.1	5778023	5778114	peak_16598	92	-	cds	rna-XM_027444317.1
SDHD	NC_040070.1	7389731	7389910	peak_16618	180	-	cds	rna-XM_027444365.1
PSMD4	NC_040071.1	843543	843634	peak_16660	92	+	cds	rna-XM_027444655.1
PGLYRP2	NC_040071.1	1337023	1337113	peak_16675	91	+	cds	rna-XM_027444516.1
CCT3	NC_040071.1	678381	678959	peak_16725	579	-	PR_intron	rna-XM_027444495.1
SYT6	NC_040072.1	315712	315832	peak_16764	121	+	cds	rna-XM_013092214.3
SYT6	NC_040072.1	330127	330188	peak_16765	62	+	utr3	rna-XM_013092214.3
MDFI	NC_040072.1	3473033	3482832	peak_16843	9800	+	PR_intron	rna-XM_027444899.1
MDFI	NC_040072.1	3486227	3486287	peak_16844	61	+	cds	rna-XM_027444899.1
MDFI	NC_040072.1	3486730	3486790	peak_16845	61	+	utr3	rna-XM_027444899.1
CNTN2	NC_040072.1	4184325	4184416	peak_16864	92	+	utr3	rna-XM_005014621.4
RPL10A	NC_040072.1	4960572	4960632	peak_16881	61	+	utr3	rna-XM_027444711.1
RBBP7	NC_040046.1	77951522	77951613	peak_1689	92	-	utr5	rna-XM_027448019.1
SARS	NC_040072.1	5801816	5801906	peak_16908	91	+	cds	rna-XM_027444852.1
MAPK13	NC_040072.1	4700061	4701525	peak_16999	1465	-	PR_intron	rna-XM_005023469.3
LOC106018323	NC_040072.1	4893097	4893923	peak_17002	827	-	PR_intron	rna-XM_027444925.1
TIMM17A	NC_040072.1	5780474	5780561	peak_17027	88	-	utr3	rna-XM_027444694.1
SCN4A	NC_040073.1	887032	887093	peak_17031	62	+	NP_exon	rna-XR_003492712.1
SCN4A	NC_040073.1	900769	900890	peak_17032	122	+	cds	rna-XM_027445679.1
SCN4A	NC_040073.1	901009	901339	peak_17033	331	+	cds	rna-XM_027445679.1
RDM1	NC_040073.1	926580	926670	peak_17035	91	+	PR_intron	rna-XM_027445690.1
RDM1	NC_040073.1	926789	926974	peak_17036	186	+	utr3	rna-XM_027445690.1
LRRC37B	NC_040073.1	937283	937464	peak_17037	182	+	cds	rna-XM_027445685.1
C1QL1	NC_040073.1	1399073	1399252	peak_17049	180	+	cds	rna-XM_027445258.1
DHX58	NC_040073.1	2932986	2933076	peak_17084	91	+	utr3	rna-XM_027445824.1
LOC101795107	NC_040073.1	3258074	3258164	peak_17092	91	+	cds	rna-XM_027445210.1
LOC101795107	NC_040073.1	3261338	3261800	peak_17094	463	+	PR_intron	rna-XM_027445210.1
LOC101795107	NC_040073.1	3262126	3262625	peak_17095	500	+	PR_intron	rna-XM_027445210.1
TNS4	NC_040073.1	3477535	3477685	peak_17100	151	+	utr3	rna-XM_027445253.1
NEUROD2	NC_040073.1	3678327	3678536	peak_17104	210	+	cds	rna-XM_013110012.2
PTGES3L	NC_040073.1	4463947	4464452	peak_17128	506	+	PR_intron	rna-XM_027445615.1
LOC113839995	NC_040073.1	4513075	4513134	peak_17132	60	+	utr5	rna-XM_027445624.1
a907e17f-4bcb-4a07-9ef9-416ffa6962ec	NC_040073.1	5707308	5707696	peak_17178	389	+	NP_exon	a907e17f-4bcb-4a07-9ef9-416ffa6962ec.trans
a907e17f-4bcb-4a07-9ef9-416ffa6962ec	NC_040073.1	5707305	5707694	peak_17180	390	+	NP_exon	a907e17f-4bcb-4a07-9ef9-416ffa6962ec.trans
ERBB3	NC_040073.1	5759606	5759780	peak_17185	175	+	utr5	rna-XM_027445841.1
GPR182	NC_040073.1	5811534	5811595	peak_17186	62	+	utr3	rna-XM_005025785.4
NAB2	NC_040073.1	5837795	5837945	peak_17187	151	+	cds	rna-XM_027445844.1
COL2A1	NC_040073.1	6172587	6173727	peak_17206	1141	+	PR_intron	rna-XM_027445847.1
GRASP	NC_040073.1	7055602	7055663	peak_17231	62	+	cds	rna-XM_027445852.1
GRASP	NC_040073.1	7057699	7057789	peak_17232	91	+	cds	rna-XM_027445852.1
SDR39U1	NC_040073.1	141490	141700	peak_17237	211	-	utr3	rna-XM_027445816.1
ASIC2	NC_040073.1	545675	545765	peak_17239	91	-	NP_exon	rna-XR_003492657.1
LOC113842289	NC_040046.1	81552680	81552800	peak_1724	121	-	utr5	rna-XM_027448964.1
ACBD4	NC_040073.1	1350682	1350743	peak_17251	62	-	utr5	rna-XM_027445723.1
LOC113839962	NC_040073.1	2844978	2847784	peak_17267	2807	-	PR_intron	rna-XM_027445283.1
NYX	NC_040046.1	82507814	82508074	peak_1727	261	-	PR_intron	rna-XM_021267513.2
FRY	NC_040046.1	22157902	22163767	peak_173	5866	+	PR_intron	rna-XM_013094125.3
WNK4	NC_040073.1	4514972	4515317	peak_17306	346	-	cds	rna-XM_027445834.1
SKAP1	NC_040073.1	4863356	4864031	peak_17312	676	-	NP_intron	rna-XR_003492681.1
SKAP1	NC_040073.1	4878730	4878851	peak_17313	122	-	PR_intron	rna-XM_027445602.1
SKAP1	NC_040073.1	4927161	4927282	peak_17314	122	-	utr5	rna-XM_027445602.1
LOC101801676	NC_040073.1	5323540	5324687	peak_17336	1148	-	PR_intron	rna-XM_013109437.3
LOC101801676	NC_040073.1	5327038	5327246	peak_17337	209	-	cds	rna-XM_013109437.3
NDUFA4L2	NC_040073.1	5964129	5964366	peak_17352	238	-	utr3	rna-XM_027445627.1
METTL7A	NC_040073.1	6911332	6911393	peak_17371	62	-	utr3	rna-XM_013103167.3
METTL7A	NC_040073.1	6912956	6913016	peak_17372	61	-	cds	rna-XM_013103167.3
5fb4ffde-6927-457b-8a9a-842698f58dc7	NC_040073.1	6983245	6983456	peak_17374	212	-	NP_exon	5fb4ffde-6927-457b-8a9a-842698f58dc7.trans
5fb4ffde-6927-457b-8a9a-842698f58dc7	NC_040073.1	6983242	6983452	peak_17376	211	-	NP_exon	5fb4ffde-6927-457b-8a9a-842698f58dc7.trans
LOC101804959	NC_040074.1	808116	809915	peak_17396	1800	+	PR_intron	rna-XM_027445995.1
GK	NC_040046.1	86188439	86188589	peak_1742	151	-	utr3	rna-XM_027454504.1
LOC101794290	NC_040074.1	240177	240387	peak_17441	211	-	cds	rna-XM_027445969.1
SEPT4	NC_040074.1	3614035	3614126	peak_17471	92	-	utr3	rna-XM_027446002.1
PDK3	NC_040046.1	88635722	88635813	peak_1748	92	-	utr3	rna-XM_027449036.1
RAX	NC_040075.1	72246	72485	peak_17484	240	+	cds	rna-XM_027447136.1
DNAI1	NC_040075.1	8722299	8722539	peak_17528	241	+	utr3	rna-XM_027446606.1
UNC13B	NC_040075.1	9364899	9364990	peak_17533	92	+	cds	rna-XM_027446260.1
WDR70	NC_040075.1	12284245	12285859	peak_17570	1615	+	PR_intron	rna-XM_027446635.1
LOC101802348	NC_040075.1	12740026	12748566	peak_17572	8541	+	PR_intron	rna-XM_027447157.1
CZH5orf51	NC_040075.1	13832644	13833083	peak_17573	440	+	PR_intron	rna-XM_027446829.1
64327330-4229-4a60-83c6-b80cdb2dcc99	NC_040075.1	19943161	19943370	peak_17607	210	+	NP_exon	64327330-4229-4a60-83c6-b80cdb2dcc99.trans
RNF180	NC_040075.1	20532121	20532302	peak_17608	182	+	cds	rna-XM_027446500.1
KCNV2	NC_040075.1	26935683	26935864	peak_17668	182	+	utr5	rna-XM_027446707.1
KCNV2	NC_040075.1	26938115	26938266	peak_17670	152	+	cds	rna-XM_027446707.1
PDCD1LG2	NC_040075.1	27803744	27803894	peak_17679	151	+	NP_exon	rna-XR_003492989.1
71cba017-5125-43cf-94c2-f08fe27480e5	NC_040075.1	28140893	28140953	peak_17689	61	+	NP_exon	71cba017-5125-43cf-94c2-f08fe27480e5.trans
PTAR1	NC_040075.1	36997214	36997334	peak_17728	121	+	utr5	rna-XM_027446753.1
LRRC2	NC_040075.1	42146522	42163680	peak_17751	17159	+	PR_intron	rna-XM_027446668.1
e2ce49c1-58c2-4317-b1d9-8d456855b4a7	NC_040075.1	43950022	43950082	peak_17756	61	+	NP_exon	e2ce49c1-58c2-4317-b1d9-8d456855b4a7.trans
e2ce49c1-58c2-4317-b1d9-8d456855b4a7	NC_040075.1	43949921	43950094	peak_17757	174	+	NP_exon	e2ce49c1-58c2-4317-b1d9-8d456855b4a7.trans
IDUA	NC_040075.1	50090478	50090598	peak_17787	121	+	utr3	rna-XM_027446442.1
PDE6B	NC_040075.1	50132646	50133505	peak_17788	860	+	PR_intron	rna-XM_027446948.1
NANS	NC_040075.1	51441289	51441438	peak_17791	150	+	utr3	rna-XM_027446335.1
TDRD7	NC_040075.1	63502601	63504810	peak_17855	2210	+	PR_intron	rna-XM_027446339.1
FOXE1	NC_040075.1	63626655	63626896	peak_17859	242	+	cds	rna-XM_027446820.1
FOXE1	NC_040075.1	63628722	63628933	peak_17860	212	+	utr3	rna-XM_027446820.1
TBC1D2	NC_040075.1	63765962	63766713	peak_17866	752	+	PR_intron	rna-XM_027446794.1
CORO2A	NC_040075.1	63825830	63825981	peak_17868	152	+	cds	rna-XM_027446523.1
PLAA	NC_040075.1	66015265	66016325	peak_17871	1061	+	PR_intron	rna-XM_027447087.1
RAB27B	NC_040075.1	1104330	1104508	peak_17935	179	-	utr3	rna-XM_027446978.1
NOL6	NC_040075.1	8130063	8130183	peak_17959	121	-	cds	rna-XM_027446604.1
GBA2	NC_040075.1	9759850	9760375	peak_17984	526	-	PR_intron	rna-XM_027446615.1
59a1cbb0-fe9a-4f22-bbe6-3ea472c4d219	NC_040075.1	10299630	10300227	peak_17990	598	-	NP_exon	59a1cbb0-fe9a-4f22-bbe6-3ea472c4d219.trans
ESM1	NC_040075.1	17088660	17088750	peak_18041	91	-	utr5	rna-XM_027446861.1
DIMT1	NC_040075.1	19947053	19947231	peak_18058	179	-	utr3	rna-XM_027446833.1
8b9f8035-cdf5-4101-9385-b212088d7501	NC_040075.1	20465856	20466095	peak_18059	240	-	NP_exon	8b9f8035-cdf5-4101-9385-b212088d7501.trans
8b9f8035-cdf5-4101-9385-b212088d7501	NC_040075.1	20465853	20466092	peak_18060	240	-	NP_exon	8b9f8035-cdf5-4101-9385-b212088d7501.trans
2c8b119e-a8a5-49d1-92f5-97c9c68df5e4	NC_040075.1	22745207	22745358	peak_18077	152	-	NP_exon	2c8b119e-a8a5-49d1-92f5-97c9c68df5e4.trans
2c8b119e-a8a5-49d1-92f5-97c9c68df5e4	NC_040075.1	22745216	22745367	peak_18079	152	-	NP_exon	2c8b119e-a8a5-49d1-92f5-97c9c68df5e4.trans
2720109b-5091-4fd6-bfce-b4c883796faf	NC_040075.1	22837785	22837845	peak_18083	61	-	NP_exon	2720109b-5091-4fd6-bfce-b4c883796faf.trans
LOC101802407	NC_040075.1	22852755	22852816	peak_18084	62	-	cds	rna-XM_013100082.2
FCHO2	NC_040075.1	25410711	25411007	peak_18099	297	-	cds	rna-XM_027446701.1
LOC113840221	NC_040075.1	25773108	25773169	peak_18101	62	-	utr5	rna-XM_027446807.1
CER1	NC_040075.1	31684964	31685055	peak_18122	92	-	cds	rna-XM_005018793.4
SAXO1	NC_040075.1	33582519	33582638	peak_18137	120	-	cds	rna-XM_027446100.1
SAXO1	NC_040075.1	33582522	33586958	peak_18138	4437	-	PR_intron	rna-XM_027446100.1
TMC1	NC_040075.1	36025660	36027402	peak_18146	1743	-	PR_intron	rna-XM_027446741.1
GDA	NC_040075.1	36134933	36135054	peak_18147	122	-	utr3	rna-XM_027446259.1
GDA	NC_040075.1	36134934	36135054	peak_18148	121	-	utr3	rna-XM_027446259.1
b8ecad53-b882-45bc-a075-f70d98302a5d	NC_040075.1	36877737	36877887	peak_18150	151	-	NP_exon	b8ecad53-b882-45bc-a075-f70d98302a5d.trans
b8ecad53-b882-45bc-a075-f70d98302a5d	NC_040075.1	36877735	36877884	peak_18151	150	-	NP_exon	b8ecad53-b882-45bc-a075-f70d98302a5d.trans
MAMDC2	NC_040075.1	36879462	36879641	peak_18152	180	-	cds	rna-XM_027446752.1
ff62ceb2-fed5-47d8-83b1-bde7f6a2a413	NC_040075.1	40418855	40418915	peak_18163	61	-	NP_exon	ff62ceb2-fed5-47d8-83b1-bde7f6a2a413.trans
3cc54871-bab7-4931-a9e4-b81a9be70f3e	NC_040075.1	40511894	40512104	peak_18166	211	-	NP_exon	3cc54871-bab7-4931-a9e4-b81a9be70f3e.trans
GAS1	NC_040075.1	40799319	40799438	peak_18173	120	-	cds	rna-XM_027446434.1
GAS1	NC_040075.1	40799319	40799438	peak_18175	120	-	cds	rna-XM_027446434.1
SERTM1	NC_040046.1	24367188	24367249	peak_182	62	+	cds	rna-XM_027470526.1
SLC44A1	NC_040075.1	48713089	48714670	peak_18217	1582	-	PR_intron	rna-XM_027447054.1
TMEM175	NC_040075.1	50142811	50142872	peak_18223	62	-	utr3	rna-XM_027446580.1
TRIM14	NC_040075.1	51444177	51444297	peak_18232	121	-	cds	rna-XM_027446333.1
06c18677-efe4-4d07-b025-5cdfe4dd87fd	NC_040075.1	53600162	53600373	peak_18250	212	-	NP_exon	06c18677-efe4-4d07-b025-5cdfe4dd87fd.trans
06c18677-efe4-4d07-b025-5cdfe4dd87fd	NC_040075.1	53600154	53600363	peak_18251	210	-	NP_exon	06c18677-efe4-4d07-b025-5cdfe4dd87fd.trans
FBXL17	NC_040075.1	55651470	55651531	peak_18254	62	-	cds	rna-XM_027446097.1
STARD4	NC_040075.1	56794616	56794736	peak_18256	121	-	utr3	rna-XM_027446496.1
DMXL1	NC_040075.1	61390168	61394528	peak_18288	4361	-	PR_intron	rna-XM_027447080.1
DMXL1	NC_040075.1	61466327	61466418	peak_18289	92	-	utr5	rna-XM_027447080.1
MTAP	NC_040075.1	63158606	63158666	peak_18297	61	-	utr5	rna-XM_021270650.2
SUSD1	NC_040075.1	68303351	68311966	peak_18323	8616	-	PR_intron	rna-XM_027447092.1
MSH3	NC_040075.1	70754505	70754656	peak_18339	152	-	cds	rna-XM_027446194.1
MSH3	NC_040075.1	70756091	70756212	peak_18340	122	-	cds	rna-XM_027446194.1
EDIL3	NC_040075.1	72150874	72152113	peak_18348	1240	-	PR_intron	rna-XM_027447105.1
LOC106015970	NC_040075.1	75742793	75766821	peak_18356	24029	-	PR_intron	rna-XM_027447111.1
KIAA0825	NC_040075.1	76273401	76273521	peak_18358	121	-	utr5	rna-XM_027446462.1
ZBTB5	NC_040075.1	77420103	77420164	peak_18363	62	-	cds	rna-XM_027447118.1
LOC113840545	NW_020865022.1	11281	13361	peak_18372	2081	-	PR_intron	rna-XM_027447291.1
LOC101793005	NW_020865126.1	15702	15883	peak_18374	182	-	utr5	rna-XM_027447367.1
LOC113840869	NW_020865354.1	55015	55460	peak_18385	446	-	NP_intron	gene-LOC113840869.trans
LOC101801710	NW_020865371.1	9346	9526	peak_18388	181	-	cds	rna-XM_027447627.1
LOC113839629	NW_020865432.1	29917	34364	peak_18394	4448	+	NP_intron	gene-LOC113839629.trans
LOC101800250	NW_020865438.1	4655	5654	peak_18396	1000	-	PR_intron	rna-XM_013100551.3
70bacbe3-e205-432c-b776-002425ec601d	NW_020865438.1	24432	24612	peak_18397	181	-	NP_exon	70bacbe3-e205-432c-b776-002425ec601d.trans
LOC101801209	NW_020865438.1	24761	24912	peak_18398	152	-	cds	rna-XM_027447679.1
70bacbe3-e205-432c-b776-002425ec601d	NW_020865438.1	24427	24607	peak_18399	181	-	NP_exon	70bacbe3-e205-432c-b776-002425ec601d.trans
LOC101801209	NW_020865438.1	24758	24908	peak_18400	151	-	cds	rna-XM_027447679.1
LOC113841235	NW_020865696.1	38539	38719	peak_18428	181	+	NP_exon	gene-LOC113841235.trans
LOC113841272	NW_020865730.1	59136	59954	peak_18431	819	+	NP_intron	gene-LOC113841272.trans
LOC113841276	NW_020865730.1	81505	81566	peak_18432	62	+	utr5	rna-XM_027447948.1
LOC113841299	NW_020865771.1	2207	2267	peak_18435	61	+	NP_exon	gene-LOC113841299.trans
LOC113841344	NW_020865821.1	60716	60893	peak_18438	178	+	NP_exon	gene-LOC113841344.trans
LOC113841361	NW_020865847.1	22676	22826	peak_18439	151	+	cds	rna-XM_027448022.1
LOC101800493	NC_040046.1	107768808	107769048	peak_1844	241	-	cds	rna-XM_027449363.1
394531ba-f19b-4ff8-aeab-035d8c0f97e9	NW_020865849.1	28923	29223	peak_18440	301	+	NP_exon	394531ba-f19b-4ff8-aeab-035d8c0f97e9.trans
394531ba-f19b-4ff8-aeab-035d8c0f97e9	NW_020865849.1	28898	29227	peak_18441	330	+	NP_exon	394531ba-f19b-4ff8-aeab-035d8c0f97e9.trans
LOC113841370	NW_020865859.1	68796	68856	peak_18446	61	+	utr3	rna-XM_027448039.1
LOC101805092	NW_020865859.1	154501	154710	peak_18449	210	+	cds	rna-XM_027448031.1
LOC113841477	NW_020866000.1	10548	10639	peak_18468	92	-	cds	rna-XM_027448139.1
LOC113841477	NW_020866000.1	11501	11652	peak_18469	152	-	utr5	rna-XM_027448139.1
LOC113841485	NW_020866012.1	7241	7330	peak_18472	90	-	cds	id-LOC113841485
LOC113841501	NW_020866060.1	5426	5635	peak_18475	210	+	cds	rna-XM_027448165.1
LOC113841521	NW_020866106.1	380	495	peak_18481	116	+	cds	rna-XM_027448184.1
LOC101790835	NW_020866106.1	5697	5846	peak_18482	150	+	cds	rna-XM_027448183.1
LOC101801464	NW_020866261.1	74580	90003	peak_18493	15424	+	PR_intron	rna-XM_027448291.1
LOC113841656	NW_020866305.1	5855	5975	peak_18500	121	-	NP_exon	gene-LOC113841656.trans
LOC113841666	NW_020866325.1	6739	6799	peak_18502	61	-	NP_exon	gene-LOC113841666.trans
LOC113841686	NW_020866345.1	18481	18659	peak_18507	179	+	NP_exon	gene-LOC113841686.trans
LOC113841744	NW_020866418.1	13812	16629	peak_18512	2818	+	NP_intron	gene-LOC113841744.trans
LOC113841767	NW_020866459.1	4990	5050	peak_18513	61	-	NP_exon	gene-LOC113841767.trans
LOC113841779	NW_020866484.1	42222	42283	peak_18517	62	-	PR_intron	rna-XM_027448459.1
LOC113841779	NW_020866484.1	42342	42492	peak_18518	151	-	PR_intron	rna-XM_027448459.1
LOC106020683	NW_020866493.1	3851	3912	peak_18519	62	+	utr5	rna-XM_027448464.1
LOC113841860	NW_020866548.1	11249	11309	peak_18526	61	+	cds	rna-XM_027448565.1
LOC113841941	NW_020866641.1	2650	2798	peak_18533	149	+	utr3	rna-XM_027448637.1
LOC113841941	NW_020866641.1	2656	2798	peak_18534	143	+	utr3	rna-XM_027448637.1
LOC113841946	NW_020866646.1	24146	24292	peak_18536	147	+	NP_exon	gene-LOC113841946.trans
LOC113839587	NW_020866695.1	21691	21784	peak_18538	94	-	cds	rna-XM_027448672.1
LOC113842050	NW_020866798.1	17280	17400	peak_18554	121	+	cds	rna-XM_027448724.1
LOC113842089	NW_020866852.1	74736	74856	peak_18556	121	+	utr3	rna-XM_027448751.1
LOC113842107	NW_020866863.1	5966	6145	peak_18560	180	+	utr3	rna-XM_027448792.1
LOC113842181	NW_020866941.1	27278	27337	peak_18571	60	-	utr3	rna-XM_027448864.1
LOC113842200	NW_020866953.1	11701	14427	peak_18573	2727	+	PR_intron	rna-XM_027448879.1
NXPE3	NC_040046.1	114539346	114539556	peak_1882	211	-	cds	rna-XM_027454798.1
DPT	NC_040046.1	115759578	115759669	peak_1910	92	-	utr3	rna-XM_005029553.3
F5	NC_040046.1	116063747	116063928	peak_1914	182	-	cds	rna-XM_005025843.4
F5	NC_040046.1	116064887	116065097	peak_1915	211	-	cds	rna-XM_005025843.4
CCDC58	NC_040046.1	121379837	121382768	peak_1990	2932	-	PR_intron	rna-XM_027449715.1
DHRS12	NC_040046.1	26713071	26713132	peak_202	62	+	utr3	rna-XM_027471107.1
TEAD4	NC_040046.1	123246250	123266189	peak_2035	19940	-	PR_intron	rna-XM_027449841.1
CAB39L	NC_040046.1	27690806	27691710	peak_208	905	+	PR_intron	rna-XM_021269347.2
TTLL1	NC_040046.1	129518957	129519078	peak_2087	122	-	utr5	rna-XM_027450058.1
USP18	NC_040046.1	138038551	138038642	peak_2127	92	-	cds	rna-XM_027465860.1
ADIPOR2	NC_040046.1	139153863	139153953	peak_2146	91	-	utr3	rna-XM_005010209.4
LOC113839738	NC_040046.1	141494344	141494434	peak_2191	91	-	cds	rna-XM_027443510.1
ADCK2	NC_040046.1	143337960	143338139	peak_2201	180	-	cds	rna-XM_027447007.1
LOC101794949	NC_040046.1	143392588	143392709	peak_2202	122	-	utr3	rna-XM_027447294.1
NUP37	NC_040046.1	144837018	144837108	peak_2213	91	-	utr5	rna-XM_027449362.1
NT5DC3	NC_040046.1	145511755	145511906	peak_2214	152	-	utr3	rna-XM_027449415.1
NT5DC3	NC_040046.1	145512055	145512146	peak_2215	92	-	cds	rna-XM_027449415.1
NFYB	NC_040046.1	145639329	145643462	peak_2218	4134	-	PR_intron	rna-XM_027449489.1
MB	NC_040046.1	148340607	148340848	peak_2240	242	-	utr3	rna-XM_005015343.4
LOC101800907	NC_040046.1	29197980	29200962	peak_225	2983	+	NP_intron	rna-XR_003501308.1
NPTXR	NC_040046.1	149522085	149522295	peak_2273	211	-	utr5	rna-XM_027450823.1
LOC101799125	NC_040046.1	157673225	157673315	peak_2344	91	-	cds	rna-XM_005024523.4
PDE6H	NC_040046.1	159023646	159023707	peak_2351	62	-	cds	rna-XM_005024558.4
LOC101796281	NC_040046.1	159194037	159194154	peak_2352	118	-	cds	rna-XM_027453220.1
LOC110351446	NC_040046.1	159196321	159196469	peak_2353	149	-	cds	rna-XM_027453069.1
XRCC6	NC_040046.1	160661301	160661422	peak_2366	122	-	cds	rna-XM_027453967.1
MYF5	NC_040046.1	161094436	161094702	peak_2372	267	-	cds	rna-NM_001310776.1
NRCAM	NC_040046.1	172862065	172862126	peak_2453	62	-	cds	rna-XM_027457225.1
TSPAN12	NC_040046.1	178514785	178514935	peak_2477	151	-	cds	rna-XM_027457847.1
ATP6AP1	NC_040046.1	179699360	179699420	peak_2481	61	-	utr3	rna-XM_027458052.1
TPRKB	NC_040046.1	187118318	187118409	peak_2509	92	-	utr5	rna-XM_027458858.1
SLC2A13	NC_040046.1	187591802	187591953	peak_2517	152	-	utr3	rna-XM_027458948.1
PRKAR2B	NC_040046.1	188413808	188430715	peak_2529	16908	-	PR_intron	rna-XM_013103601.2
LHFPL3	NC_040046.1	189238192	189238313	peak_2542	122	-	utr3	rna-XM_027463878.1
CCDC146	NC_040046.1	190224096	190224276	peak_2548	181	-	PR_intron	rna-XM_027459568.1
SMKR1	NC_040046.1	201942423	201942514	peak_2595	92	-	utr3	rna-XM_027461748.1
STRIP2	NC_040046.1	201965300	201965626	peak_2596	327	-	PR_intron	rna-XM_027461672.1
5a85da92-faa6-465c-b45d-0e1d2b224743	NC_040047.1	407274	407335	peak_2630	62	+	NP_exon	5a85da92-faa6-465c-b45d-0e1d2b224743.trans
5a85da92-faa6-465c-b45d-0e1d2b224743	NC_040047.1	407248	407336	peak_2631	89	+	NP_exon	5a85da92-faa6-465c-b45d-0e1d2b224743.trans
SCEL	NC_040046.1	43185963	43187109	peak_267	1147	+	PR_intron	rna-XM_027442865.1
LOC101798325	NC_040047.1	2476487	2476607	peak_2671	121	+	cds	rna-XM_013103545.3
LOC101798325	NC_040047.1	2477175	2477325	peak_2672	151	+	cds	rna-XM_013103545.3
5e65eebc-94cc-493c-a7ba-3bdd8632b607	NC_040046.1	48562780	48562841	peak_270	62	+	NP_exon	5e65eebc-94cc-493c-a7ba-3bdd8632b607.trans
5e65eebc-94cc-493c-a7ba-3bdd8632b607	NC_040046.1	48562780	48562840	peak_271	61	+	NP_exon	5e65eebc-94cc-493c-a7ba-3bdd8632b607.trans
LOC101798603	NC_040047.1	4319977	4320097	peak_2712	121	+	utr3	rna-XM_027450352.1
MYD88	NC_040047.1	4834763	4834943	peak_2717	181	+	utr3	rna-NM_001310832.1
MYD88	NC_040047.1	4834772	4834950	peak_2718	179	+	utr3	rna-NM_001310832.1
HTR5A	NC_040047.1	7941177	7941296	peak_2734	120	+	utr3	rna-XM_005026025.4
6e7d5553-7df9-484f-96b5-17b12be9d143	NC_040047.1	16789678	16789769	peak_2794	92	+	NP_exon	6e7d5553-7df9-484f-96b5-17b12be9d143.trans
6e7d5553-7df9-484f-96b5-17b12be9d143	NC_040047.1	16789678	16789768	peak_2795	91	+	NP_exon	6e7d5553-7df9-484f-96b5-17b12be9d143.trans
NSUN6	NC_040047.1	20275274	20275335	peak_2812	62	+	cds	rna-XM_027452888.1
ST8SIA6	NC_040047.1	20991792	20991881	peak_2816	90	+	utr3	rna-XM_027450686.1
TRDMT1	NC_040047.1	21056153	21056423	peak_2817	271	+	cds	rna-XM_027450692.1
VPS50	NC_040047.1	24540200	24541415	peak_2852	1216	+	PR_intron	rna-XM_027450788.1
COL1A2	NC_040047.1	25236339	25236430	peak_2856	92	+	utr3	rna-XM_027450802.1
CLYBL	NC_040046.1	54108082	54108263	peak_286	182	+	PR_intron	rna-XM_027443633.1
LOC101801254	NC_040047.1	28589367	28589456	peak_2885	90	+	utr5	rna-XM_027450869.1
IL6	NC_040047.1	33216893	33216954	peak_2898	62	+	utr3	rna-XM_027450925.1
GPD1L	NC_040047.1	42877010	42877131	peak_2939	122	+	utr5	rna-XM_027451102.1
TXNL4A	NC_040047.1	46872002	46872153	peak_2980	152	+	cds	rna-XM_027451186.1
ATP11A	NC_040046.1	60871586	60871676	peak_309	91	+	cds	rna-XM_021273955.2
C2H5orf22	NC_040047.1	76814923	76814984	peak_3104	62	+	cds	rna-XM_027451659.1
EXOC2	NC_040047.1	79184666	79200185	peak_3121	15520	+	PR_intron	rna-XM_005022854.4
LOC101803585	NC_040047.1	82143661	82143902	peak_3131	242	+	cds	rna-XM_027451741.1
88f77f02-d475-4f3f-a47a-09b197acd755	NC_040047.1	82143961	82144231	peak_3132	271	+	NP_exon	88f77f02-d475-4f3f-a47a-09b197acd755.trans
LOC101803585	NC_040047.1	82145637	82145907	peak_3133	271	+	utr3	rna-XM_027451741.1
88f77f02-d475-4f3f-a47a-09b197acd755	NC_040047.1	82143606	82144235	peak_3134	630	+	NP_exon	88f77f02-d475-4f3f-a47a-09b197acd755.trans
LOC101803585	NC_040047.1	82145669	82145909	peak_3135	241	+	utr3	rna-XM_027451741.1
FAM173B	NC_040047.1	82175723	82175874	peak_3136	152	+	cds	rna-XM_027451743.1
RPRD1A	NC_040047.1	87755771	87755891	peak_3146	121	+	utr3	rna-XM_005025655.3
e2b17863-86ec-4381-b1e0-9dee6f1fb9cf	NC_040047.1	109102813	109102873	peak_3252	61	+	NP_exon	e2b17863-86ec-4381-b1e0-9dee6f1fb9cf.trans
e2b17863-86ec-4381-b1e0-9dee6f1fb9cf	NC_040047.1	109102828	109102889	peak_3254	62	+	NP_exon	e2b17863-86ec-4381-b1e0-9dee6f1fb9cf.trans
LOC101798236	NC_040046.1	62856425	62856546	peak_327	122	+	PR_intron	rna-XM_005012450.4
B4GALT6	NC_040047.1	112585706	112585767	peak_3274	62	+	utr5	rna-XM_027452181.1
LOC113840114	NC_040046.1	65678356	65683894	peak_338	5539	+	PR_intron	rna-XM_027446219.1
CPQ	NC_040047.1	133336074	133336135	peak_3402	62	+	cds	rna-XM_027452499.1
RNF139	NC_040047.1	144773208	144773298	peak_3438	91	+	utr5	rna-XM_027452684.1
MAPK15	NC_040047.1	155333507	155333657	peak_3466	151	+	utr3	rna-XM_027452848.1
TBRG4	NC_040047.1	814895	815104	peak_3488	210	-	cds	rna-XM_027452870.1
MGAT4A	NC_040046.1	66230167	66231888	peak_350	1722	+	PR_intron	rna-XM_027446443.1
MGAT4A	NC_040046.1	66233044	66233253	peak_351	210	+	utr5	rna-XM_027446447.1
RHEB	NC_040047.1	6366354	6366443	peak_3538	90	-	utr5	rna-XM_027450395.1
NIPA2	NC_040046.1	68287104	68287255	peak_354	152	+	cds	rna-XM_027446903.1
PTPRN2	NC_040047.1	9128681	9128802	peak_3560	122	-	utr3	rna-XM_027450443.1
SPAG6	NC_040047.1	18689312	18689402	peak_3626	91	-	utr3	rna-XM_027450638.1
LOC101801378	NC_040047.1	20697298	20697358	peak_3638	61	-	cds	rna-XM_027450680.1
LOC101800998	NC_040047.1	20800500	20802303	peak_3641	1804	-	PR_intron	rna-XM_027450674.1
LOC113842648	NC_040047.1	22018872	22019301	peak_3651	430	-	PR_intron	rna-XM_027450724.1
PDK4	NC_040047.1	25559159	25559250	peak_3663	92	-	utr3	rna-XM_027450819.1
VWDE	NC_040047.1	28613292	28613383	peak_3668	92	-	cds	rna-XM_027450868.1
ASMT	NC_040046.1	69776034	69776422	peak_370	389	+	PR_intron	rna-XM_027447216.1
SLC4A7	NC_040047.1	41035739	41041027	peak_3747	5289	-	PR_intron	rna-XM_027451088.1
SLC4A7	NC_040047.1	41068887	41068978	peak_3748	92	-	PR_intron	rna-XM_027451088.1
b967495a-6aa8-4249-9203-27e747d61f67	NC_040047.1	43084264	43084443	peak_3756	180	-	NP_exon	b967495a-6aa8-4249-9203-27e747d61f67.trans
b967495a-6aa8-4249-9203-27e747d61f67	NC_040047.1	43084264	43084444	peak_3757	181	-	NP_exon	b967495a-6aa8-4249-9203-27e747d61f67.trans
CAPN7	NC_040047.1	43942895	43942956	peak_3772	62	-	NP_exon	rna-XR_003495317.1
CPNE4	NC_040047.1	44636915	44637065	peak_3778	151	-	PR_intron	rna-XM_013104976.3
TOPBP1	NC_040047.1	45186721	45186812	peak_3782	92	-	cds	rna-XM_027450147.1
LOC101800940	NC_040047.1	45254581	45255730	peak_3785	1150	-	PR_intron	rna-XM_013096745.3
LARS2	NC_040047.1	45551778	45554869	peak_3790	3092	-	PR_intron	rna-XM_027450150.1
LOC101803570	NC_040047.1	46840339	46840459	peak_3804	121	-	utr3	rna-XM_027451184.1
LOC101803570	NC_040047.1	46845488	46845798	peak_3805	311	-	PR_intron	rna-XM_027451184.1
E2F3	NC_040047.1	50127767	50127887	peak_3819	121	-	utr3	rna-XM_027451219.1
E2F3	NC_040047.1	50170646	50170826	peak_3820	181	-	cds	rna-XM_027451219.1
ADCY1	NC_040047.1	53664199	53664380	peak_3829	182	-	utr5	rna-XM_021268899.2
SFRP4	NC_040047.1	62484304	62484424	peak_3867	121	-	utr5	rna-XM_027451456.1
EDN1	NC_040047.1	63348742	63348832	peak_3870	91	-	utr3	rna-XM_027451476.1
RNF152	NC_040047.1	77289851	77290182	peak_3919	332	-	utr3	rna-XM_027451666.1
RNF152	NC_040047.1	77290570	77290781	peak_3920	212	-	cds	rna-XM_027451666.1
RNF152	NC_040047.1	77289864	77290193	peak_3921	330	-	utr3	rna-XM_027451666.1
OTULINL	NC_040047.1	79889799	79889979	peak_3941	181	-	utr5	rna-XM_013102813.3
COBL	NC_040047.1	85019289	85019380	peak_3962	92	-	cds	rna-XM_027451773.1
LOC101794093	NC_040047.1	94277087	94277177	peak_3988	91	-	utr3	rna-XM_027451865.1
LOC101794093	NC_040047.1	94277064	94277185	peak_3990	122	-	utr3	rna-XM_027451865.1
ACOT13	NC_040047.1	94740685	94740804	peak_3994	120	-	utr3	rna-XM_005023065.2
ACOT13	NC_040047.1	94740978	94746123	peak_3995	5146	-	PR_intron	rna-XM_005023065.2
C2H18orf63	NC_040047.1	96435464	96435675	peak_4009	212	-	NP_exon	rna-XR_003495575.1
C2H18orf63	NC_040047.1	96440440	96440530	peak_4010	91	-	NP_exon	rna-XR_003495575.1
MC5R	NC_040047.1	101546631	101546722	peak_4018	92	-	cds	rna-XM_027451922.1
MC5R	NC_040047.1	101547109	101547229	peak_4019	121	-	cds	rna-XM_027451922.1
EPB41L3	NC_040047.1	105239198	105265743	peak_4051	26546	-	PR_intron	rna-XM_021266679.2
MPPE1	NC_040047.1	108109015	108127979	peak_4063	18965	-	PR_intron	rna-XM_027452066.1
LOC101799338	NC_040047.1	112648817	112649028	peak_4083	212	-	cds	rna-XM_027452182.1
LOC101799338	NC_040047.1	112658919	112658980	peak_4084	62	-	cds	rna-XM_027452182.1
CA8	NC_040047.1	118375627	118375718	peak_4096	92	-	PR_intron	rna-XM_027452277.1
CRH	NC_040047.1	120748806	120748926	peak_4107	121	-	cds	rna-XM_027452300.1
MYBL1	NC_040047.1	120884800	120884860	peak_4108	61	-	cds	rna-XM_027452308.1
ARFGEF1	NC_040047.1	121168299	121169434	peak_4112	1136	-	PR_intron	rna-XM_027450227.1
ARFGEF1	NC_040047.1	121177977	121179471	peak_4113	1495	-	PR_intron	rna-XM_027450227.1
CPA6	NC_040047.1	121248919	121249068	peak_4114	150	-	cds	rna-XM_005019354.4
STAU2	NC_040047.1	123674436	123713317	peak_4123	38882	-	PR_intron	rna-XM_027452357.1
EIF3H	NC_040047.1	141761847	141782264	peak_4219	20418	-	PR_intron	rna-XM_027452628.1
KLHL38	NC_040047.1	144421095	144421216	peak_4243	122	-	cds	rna-XM_005020549.4
KLHL38	NC_040047.1	144421092	144421213	peak_4244	122	-	cds	rna-XM_005020549.4
AGO2	NC_040047.1	152023115	152030820	peak_4273	7706	-	PR_intron	rna-XM_027452745.1
HHAT	NC_040048.1	549036	592601	peak_4316	43566	+	PR_intron	rna-XM_027452998.1
RAB3GAP2	NC_040048.1	3054859	3063489	peak_4339	8631	+	PR_intron	rna-XM_027453124.1
SSTR4	NC_040048.1	4931778	4931899	peak_4348	122	+	utr5	rna-XM_027453182.1
SSTR4	NC_040048.1	4932767	4933038	peak_4349	272	+	utr5	rna-XM_027453182.1
SSTR4	NC_040048.1	4933816	4933907	peak_4350	92	+	utr5	rna-XM_027453182.1
SSTR4	NC_040048.1	4934835	4934896	peak_4351	62	+	utr5	rna-XM_027453182.1
SSTR4	NC_040048.1	4936363	4936484	peak_4352	122	+	utr5	rna-XM_027453182.1
SSTR4	NC_040048.1	4937622	4938381	peak_4353	760	+	PR_intron	rna-XM_027453182.1
LOC113842120	NC_040046.1	80607478	80607569	peak_436	92	+	NP_exon	gene-LOC113842120.trans
CHAC2	NC_040048.1	5267855	5267975	peak_4360	121	+	cds	rna-XM_027453215.1
VRK2	NC_040048.1	6762051	6762171	peak_4378	121	+	cds	rna-XM_013098795.2
KIAA1841	NC_040048.1	7986646	7987739	peak_4385	1094	+	PR_intron	rna-XM_027453285.1
SEC23B	NC_040048.1	17203136	17203486	peak_4479	351	+	PR_intron	rna-XM_027453564.1
EXO1	NC_040048.1	26976205	26976697	peak_4554	493	+	PR_intron	rna-XM_005023608.3
EFCAB2	NC_040048.1	28140202	28140263	peak_4561	62	+	utr3	rna-XM_027453854.1
MAD2L1BP	NC_040048.1	32124548	32124759	peak_4603	212	+	cds	rna-XM_027453973.1
MAD2L1BP	NC_040048.1	32124877	32124968	peak_4604	92	+	utr3	rna-XM_027453973.1
RHOQ	NC_040048.1	36559832	36560102	peak_4637	271	+	PR_intron	rna-XM_027454072.1
LRPPRC	NC_040048.1	38041665	38041834	peak_4641	170	+	PR_intron	rna-XM_027454113.1
216b72b6-32ee-4145-ac81-235fa4c46da7	NC_040046.1	86041208	86041358	peak_466	151	+	NP_exon	216b72b6-32ee-4145-ac81-235fa4c46da7.trans
PRKN	NC_040048.1	47478802	47478862	peak_4680	61	+	cds	rna-XM_027453311.1
ARRB1	NC_040046.1	857385	857445	peak_47	61	+	cds	rna-XM_027464859.1
OPRM1	NC_040048.1	52701048	52701199	peak_4729	152	+	cds	rna-XM_027454380.1
ACOT9	NC_040046.1	88912064	88912245	peak_477	182	+	utr3	rna-XM_027449060.1
MAP3K5	NC_040048.1	57883487	57883608	peak_4787	122	+	utr5	rna-XM_027454464.1
MAP3K5	NC_040048.1	57955783	57957814	peak_4788	2032	+	PR_intron	rna-XM_027454464.1
bde681c5-27f2-452f-bf4d-1a041b6bb3cf	NC_040048.1	62381277	62381517	peak_4815	241	+	NP_exon	bde681c5-27f2-452f-bf4d-1a041b6bb3cf.trans
bde681c5-27f2-452f-bf4d-1a041b6bb3cf	NC_040048.1	62381274	62381514	peak_4816	241	+	NP_exon	bde681c5-27f2-452f-bf4d-1a041b6bb3cf.trans
TBC1D32	NC_040048.1	65233532	65245114	peak_4824	11583	+	NP_intron	rna-XR_003496472.1
NT5DC1	NC_040048.1	67526221	67526371	peak_4837	151	+	PR_intron	rna-XM_027454680.1
LCA5L	NC_040046.1	91490283	91490403	peak_484	121	+	cds	rna-XM_027449093.1
TRAF3IP2	NC_040048.1	69580499	69580932	peak_4844	434	+	PR_intron	rna-XM_027454692.1
TRAF3IP2	NC_040048.1	69581439	69581539	peak_4845	101	+	PR_intron	rna-XM_027454692.1
LCA5L	NC_040046.1	91490671	91490732	peak_485	62	+	cds	rna-XM_027449093.1
METTL24	NC_040048.1	70192788	70192879	peak_4857	92	+	utr3	rna-XM_027454717.1
SNX3	NC_040048.1	71094666	71094757	peak_4869	92	+	utr3	rna-XM_005016493.3
CCNC	NC_040048.1	75348455	75348545	peak_4882	91	+	utr5	rna-XM_027454793.1
UBE2J1	NC_040048.1	80053235	80053356	peak_4910	122	+	utr3	rna-XM_027454909.1
LOC101798492	NC_040048.1	80079635	80079696	peak_4911	62	+	utr3	rna-XM_005012363.4
SPACA1	NC_040048.1	80284946	80285182	peak_4913	237	+	utr3	rna-XM_027454916.1
SPACA1	NC_040048.1	80284948	80285182	peak_4914	235	+	utr3	rna-XM_027454916.1
409ccf19-e64f-4447-abda-e06e950dce8d	NC_040048.1	82383097	82383217	peak_4926	121	+	NP_exon	409ccf19-e64f-4447-abda-e06e950dce8d.trans
LMBRD1	NC_040048.1	87949697	87961136	peak_4955	11440	+	PR_intron	rna-XM_005009723.3
LOC113843304	NC_040048.1	92249220	92249280	peak_4974	61	+	cds	rna-XM_027455079.1
VPS26C	NC_040046.1	92441366	92441485	peak_498	120	+	utr5	rna-XM_013093318.3
RNF144A	NC_040048.1	101167176	101167356	peak_5001	181	+	utr3	rna-XM_027455203.1
CTSB	NC_040048.1	114796490	114796551	peak_5059	62	+	utr5	rna-XM_027455386.1
AGBL5	NC_040048.1	117542959	117543049	peak_5106	91	+	cds	rna-XM_027455519.1
EPHX1	NC_040048.1	1421943	1422092	peak_5118	150	-	cds	rna-XM_005015504.4
LOC113843374	NC_040048.1	5807352	5807520	peak_5180	169	-	cds	rna-XM_027455570.1
XPO1	NC_040048.1	8234157	8234409	peak_5205	253	-	PR_intron	rna-XM_027453298.1
BFSP1	NC_040048.1	10052828	10053129	peak_5215	302	-	cds	rna-XM_005010832.4
CCT8	NC_040046.1	95616820	95617685	peak_523	866	+	PR_intron	rna-XM_027449251.1
ACTR2	NC_040048.1	14257628	14257749	peak_5234	122	-	utr5	rna-XM_027453409.1
ARHGEF33	NC_040048.1	15704448	15704509	peak_5261	62	-	cds	rna-XM_013099102.3
KLHDC3	NC_040048.1	16361279	16361459	peak_5282	181	-	utr3	rna-XM_027453529.1
861b50b2-373a-4dc6-8823-e70990f5ae3c	NC_040048.1	24092022	24092172	peak_5348	151	-	NP_exon	861b50b2-373a-4dc6-8823-e70990f5ae3c.trans
861b50b2-373a-4dc6-8823-e70990f5ae3c	NC_040048.1	24092028	24092178	peak_5349	151	-	NP_exon	861b50b2-373a-4dc6-8823-e70990f5ae3c.trans
RGS7	NC_040048.1	26544239	26553354	peak_5366	9116	-	PR_intron	rna-XM_027453802.1
LOC101799215	NC_040048.1	28938891	28938982	peak_5382	92	-	cds	rna-XM_027453136.1
NDUFAF7	NC_040048.1	29304816	29304905	peak_5387	90	-	utr3	rna-XM_027453888.1
HEATR5B	NC_040048.1	30851678	30851769	peak_5391	92	-	cds	rna-XM_005022223.4
HEATR5B	NC_040048.1	30898261	30898781	peak_5392	521	-	PR_intron	rna-XM_005022223.4
HEATR5B	NC_040048.1	30905747	30905808	peak_5393	62	-	utr5	rna-XM_027453896.1
MRPL14	NC_040048.1	32640800	32640947	peak_5410	148	-	cds	rna-XM_027453999.1
SAMSN1	NC_040046.1	101592761	101592852	peak_542	92	+	cds	rna-XM_021279058.2
RHOQ	NC_040048.1	36574253	36574343	peak_5435	91	-	PR_intron	rna-XM_027454071.1
PKDCC	NC_040048.1	40193926	40193986	peak_5461	61	-	cds	rna-XM_005015296.4
ERMARD	NC_040048.1	43094563	43094653	peak_5484	91	-	PR_intron	rna-XM_027454212.1
EPM2A	NC_040048.1	48896284	48896464	peak_5510	181	-	cds	rna-XM_027454307.1
KATNA1	NC_040048.1	50679838	50679988	peak_5518	151	-	cds	rna-XM_005008892.4
RGS17	NC_040048.1	52302692	52302842	peak_5538	151	-	utr5	rna-XM_027454378.1
f25f9df0-c105-4360-bb52-3e19f566cf99	NC_040048.1	59390659	59390899	peak_5560	241	-	NP_exon	f25f9df0-c105-4360-bb52-3e19f566cf99.trans
LAMA2	NC_040048.1	61355316	61355377	peak_5573	62	-	cds	rna-XM_027454548.1
LAMA2	NC_040048.1	61359959	61363726	peak_5574	3768	-	PR_intron	rna-XM_027454548.1
POU3F2	NC_040048.1	75731933	75732258	peak_5630	326	-	cds	rna-XM_027454816.1
KLHL32	NC_040048.1	76575741	76575921	peak_5632	181	-	cds	rna-XM_027454825.1
PRIM2	NC_040048.1	91946721	91946781	peak_5726	61	-	utr5	rna-XM_027455068.1
BEND6	NC_040048.1	92051182	92051332	peak_5729	151	-	utr3	rna-XM_027455074.1
BEND6	NC_040048.1	92060607	92060891	peak_5730	285	-	cds	rna-XM_027455074.1
BEND6	NC_040048.1	92070932	92073199	peak_5731	2268	-	PR_intron	rna-XM_027455077.1
MLIP	NC_040048.1	93283444	93283564	peak_5732	121	-	PR_intron	rna-XM_013093075.3
MLIP	NC_040048.1	93340781	93340902	peak_5733	122	-	utr5	rna-XM_027455096.1
LOC101794576	NC_040048.1	93351786	93351847	peak_5734	62	-	PR_intron	rna-XM_027455101.1
ELOA	NC_040048.1	93486665	93486755	peak_5736	91	-	cds	rna-XM_027455102.1
MYT1L	NC_040048.1	98971975	98972245	peak_5758	271	-	cds	rna-XM_021267542.2
MBOAT2	NC_040048.1	102053792	102054557	peak_5767	766	-	PR_intron	rna-XM_027455207.1
LOC106015550	NC_040048.1	106953934	106954025	peak_5792	92	-	cds	rna-XM_027455273.1
LOC101803951	NC_040048.1	111791076	111791954	peak_5819	879	-	PR_intron	rna-XM_021267767.2
PLA2G7	NC_040048.1	112997302	112997363	peak_5827	62	-	utr3	rna-XM_027455344.1
PLA2G7	NC_040048.1	112999760	113001133	peak_5828	1374	-	PR_intron	rna-XM_027455344.1
OTOF	NC_040048.1	116809000	116810314	peak_5865	1315	-	PR_intron	rna-XM_027455472.1
SELENOI	NC_040048.1	116996129	116996310	peak_5866	182	-	cds	rna-XM_027455502.1
CASP6	NC_040049.1	4120580	4120641	peak_5895	62	+	utr5	rna-XM_021272679.2
SLC9B2	NC_040049.1	6275353	6276640	peak_5916	1288	+	PR_intron	rna-XM_005017696.4
EMCN	NC_040049.1	7069516	7069696	peak_5928	181	+	utr3	rna-XM_021277380.2
EIF4E	NC_040049.1	7293729	7293790	peak_5946	62	+	cds	rna-XM_013104108.3
MBOAT4	NC_040049.1	11969595	11969775	peak_5960	181	+	utr5	rna-XM_005019579.4
98f3fe9b-f396-4f83-bc6c-cc2aa9cf0d7f	NC_040049.1	15855272	15855662	peak_5988	391	+	NP_exon	98f3fe9b-f396-4f83-bc6c-cc2aa9cf0d7f.trans
98f3fe9b-f396-4f83-bc6c-cc2aa9cf0d7f	NC_040049.1	15855259	15855670	peak_5989	412	+	NP_exon	98f3fe9b-f396-4f83-bc6c-cc2aa9cf0d7f.trans
MRPL1	NC_040049.1	16055281	16055342	peak_6000	62	+	utr5	rna-XM_005025129.4
MRPL1	NC_040049.1	16061739	16063307	peak_6001	1569	+	PR_intron	rna-XM_005025129.4
MRPL1	NC_040049.1	16075454	16075635	peak_6002	182	+	cds	rna-XM_005025129.4
GSR	NC_040049.1	16374539	16374629	peak_6014	91	+	cds	rna-XM_005025125.4
GSR	NC_040049.1	16374777	16374867	peak_6015	91	+	utr3	rna-XM_005025125.4
PDGFRL	NC_040049.1	17972204	17972295	peak_6029	92	+	utr3	rna-XM_027456180.1
SORBS2	NC_040049.1	19839191	19839342	peak_6043	152	+	utr5	rna-XM_027456257.1
LRP2BP	NC_040049.1	20075300	20075420	peak_6050	121	+	utr5	rna-XM_027456271.1
VEGFC	NC_040049.1	23401335	23401428	peak_6060	94	+	cds	rna-XM_027456375.1
VEGFC	NC_040049.1	23476047	23476198	peak_6061	152	+	utr3	rna-XM_027456375.1
VEGFC	NC_040049.1	23475731	23475821	peak_6062	91	+	cds	rna-XM_027456375.1
VEGFC	NC_040049.1	23476028	23476148	peak_6063	121	+	utr3	rna-XM_027456375.1
AADAT	NC_040049.1	25860062	25860123	peak_6066	62	+	utr3	rna-XM_027456417.1
MARCH1	NC_040049.1	28028331	28028452	peak_6078	122	+	utr3	rna-XM_027456478.1
PPID	NC_040049.1	29565162	29565307	peak_6081	146	+	PR_intron	rna-XM_027456526.1
B4GALT3	NC_040046.1	118881077	118881197	peak_609	121	+	utr5	rna-XM_027449633.1
QRFPR	NC_040049.1	43519400	43519490	peak_6152	91	+	cds	rna-XM_027456880.1
QRFPR	NC_040049.1	43519415	43519476	peak_6153	62	+	cds	rna-XM_027456880.1
DMP1	NC_040049.1	45333725	45333845	peak_6182	121	+	cds	rna-XM_005012780.4
DMP1	NC_040049.1	45333964	45334143	peak_6183	180	+	cds	rna-XM_005012780.4
DMP1	NC_040049.1	45334291	45334501	peak_6184	211	+	cds	rna-XM_005012780.4
IBSP	NC_040049.1	45339842	45340383	peak_6185	542	+	cds	rna-XM_021267714.2
RASSF6	NC_040049.1	46812900	46814964	peak_6195	2065	+	PR_intron	rna-XM_027457022.1
LOC101797408	NC_040049.1	47003768	47003858	peak_6200	91	+	utr3	rna-XM_027457028.1
USP46	NC_040049.1	49137849	49138000	peak_6216	152	+	utr3	rna-XM_027457092.1
ATP8A1	NC_040049.1	51514983	51515073	peak_6224	91	+	utr5	rna-XM_027457162.1
a03f504d-99c7-434e-b133-db454bc7659a	NC_040049.1	60736549	60736610	peak_6266	62	+	NP_exon	a03f504d-99c7-434e-b133-db454bc7659a.trans
SLC2A9	NC_040049.1	62905159	62905280	peak_6281	122	+	utr3	rna-XM_027457388.1
SLC2A9	NC_040049.1	62905368	62905549	peak_6282	182	+	utr3	rna-XM_027457388.1
LOC113843456	NC_040049.1	75838813	75838963	peak_6367	151	+	cds	rna-XM_027455904.1
UGT8	NC_040049.1	2202495	2202586	peak_6380	92	-	cds	rna-XM_027456218.1
ARHGEF38	NC_040049.1	5614154	5614335	peak_6407	182	-	utr3	rna-XM_005027895.4
CD4	NC_040046.1	121786473	121786707	peak_642	235	+	cds	rna-NM_001310403.1
BANK1	NC_040049.1	6566211	6567758	peak_6422	1548	-	PR_intron	rna-XM_027456007.1
CD4	NC_040046.1	121786765	121786825	peak_643	61	+	cds	rna-NM_001310403.1
LOC101796809	NC_040049.1	11934318	11935468	peak_6439	1151	-	PR_intron	rna-XM_027455816.1
LOC101796668	NC_040049.1	15089839	15090019	peak_6464	181	-	utr5	rna-XM_013092291.3
LOC101796668	NC_040049.1	15090857	15090918	peak_6465	62	-	utr5	rna-XM_013092291.3
MTMR7	NC_040049.1	17830556	17830617	peak_6486	62	-	cds	rna-XM_027456165.1
FGL1	NC_040049.1	18117814	18123593	peak_6491	5780	-	PR_intron	rna-XM_027456184.1
GALNTL6	NC_040049.1	24890169	24890350	peak_6536	182	-	cds	rna-XM_027456412.1
MSMO1	NC_040049.1	27558892	27559042	peak_6550	151	-	cds	rna-XM_027456459.1
POU4F2	NC_040049.1	34433256	34433874	peak_6593	619	-	PR_intron	rna-XM_027456518.1
SCD5	NC_040049.1	44558115	44558205	peak_6674	91	-	utr5	rna-XM_027456926.1
LOC101799420	NC_040049.1	45279586	45279824	peak_6681	239	-	utr3	rna-XM_027456971.1
LOC101792948	NC_040049.1	45291982	45292042	peak_6683	61	-	utr3	rna-XM_027456243.1
ABCG2	NC_040049.1	45392200	45392685	peak_6684	486	-	PR_intron	rna-XM_013093252.3
C3AR1	NC_040046.1	123444019	123444168	peak_672	150	+	cds	rna-XM_027449859.1
SPATA18	NC_040049.1	49297339	49297400	peak_6725	62	-	utr5	rna-XM_005013744.3
ZAR1	NC_040049.1	49597977	49598068	peak_6728	92	-	cds	rna-XM_027456244.1
C3AR1	NC_040046.1	123444316	123444466	peak_673	151	+	utr3	rna-XM_027449859.1
NSUN7	NC_040049.1	52237393	52237484	peak_6742	92	-	cds	rna-XM_013095649.3
NSUN7	NC_040049.1	52237723	52239602	peak_6743	1880	-	PR_intron	rna-XM_013095649.3
ZCCHC4	NC_040049.1	57528298	57528665	peak_6768	368	-	PR_intron	rna-XM_027457302.1
LOC101802861	NC_040049.1	62677351	62683502	peak_6783	6152	-	PR_intron	rna-XM_027457386.1
STX18	NC_040049.1	63075699	63079578	peak_6787	3880	-	PR_intron	rna-XM_027457395.1
C4H4orf48	NC_040049.1	67901528	67901678	peak_6832	151	-	cds	rna-XM_013096368.3
LOC101793524	NC_040049.1	67923600	67923660	peak_6833	61	-	utr5	rna-XM_027455669.1
CCT7	NC_040049.1	74637947	74638008	peak_6894	62	-	cds	rna-XM_027455853.1
DYSF	NC_040049.1	75685275	75685750	peak_6897	476	-	PR_intron	rna-XM_027455892.1
LYPD6B	NC_040050.1	2257279	2257370	peak_6919	92	+	utr3	rna-XM_027458365.1
GALNT5	NC_040050.1	3801661	3801812	peak_6933	152	+	cds	rna-XM_013096181.2
GALNT5	NC_040050.1	3813116	3813237	peak_6934	122	+	utr3	rna-XM_013096181.2
PKP4	NC_040050.1	4118382	4118472	peak_6935	91	+	cds	rna-XM_027458223.1
PKP4	NC_040050.1	4118372	4118457	peak_6936	86	+	cds	rna-XM_027458223.1
BCAT1	NC_040046.1	126337525	126337646	peak_695	122	+	utr3	rna-XM_027449955.1
CGRRF1	NC_040050.1	8044538	8044659	peak_6965	122	+	cds	rna-XM_027458546.1
JKAMP	NC_040050.1	9781609	9781699	peak_7007	91	+	utr3	rna-XM_005031527.4
PRKCH	NC_040050.1	10635561	10635622	peak_7012	62	+	utr3	rna-XM_027458011.1
MTHFD1	NC_040050.1	11810568	11810930	peak_7035	363	+	PR_intron	rna-XM_027458022.1
GSC	NC_040050.1	19533057	19533525	peak_7110	469	+	PR_intron	rna-XM_027459131.1
TC2N	NC_040050.1	20939399	20939549	peak_7130	151	+	utr3	rna-XM_027457660.1
EML5	NC_040050.1	22397445	22397626	peak_7148	182	+	utr3	rna-XM_027457862.1
b971ed24-be5f-4eff-b266-3ffe6406f606	NC_040050.1	27049740	27049891	peak_7174	152	+	NP_exon	b971ed24-be5f-4eff-b266-3ffe6406f606.trans
b971ed24-be5f-4eff-b266-3ffe6406f606	NC_040050.1	27049671	27049905	peak_7175	235	+	NP_exon	b971ed24-be5f-4eff-b266-3ffe6406f606.trans
5ed4af64-d151-443f-8cb1-e331006706ab	NC_040050.1	27051515	27051696	peak_7176	182	+	NP_exon	5ed4af64-d151-443f-8cb1-e331006706ab.trans
5ed4af64-d151-443f-8cb1-e331006706ab	NC_040050.1	27051525	27051706	peak_7177	182	+	NP_exon	5ed4af64-d151-443f-8cb1-e331006706ab.trans
ZDHHC22	NC_040050.1	27256429	27256549	peak_7183	121	+	utr3	rna-XM_005013876.4
RPS6KL1	NC_040050.1	28366680	28366771	peak_7199	92	+	cds	rna-XM_027458576.1
SEC23A	NC_040050.1	28947916	28947977	peak_7207	62	+	PR_intron	rna-XM_013101321.3
LOC101790460	NC_040050.1	31294960	31295111	peak_7219	152	+	cds	rna-XM_027458017.1
PTPN5	NC_040050.1	33605411	33605848	peak_7235	438	+	PR_intron	rna-XM_027459295.1
PTPN5	NC_040050.1	33674275	33677975	peak_7236	3701	+	PR_intron	rna-XM_027459299.1
LOC113843747	NC_040050.1	34663600	34663749	peak_7270	150	+	cds	rna-XM_027458069.1
CHST1	NC_040050.1	36744836	36744955	peak_7323	120	+	cds	rna-XM_005013970.4
JMJD7	NC_040050.1	37994391	37994629	peak_7359	239	+	utr3	rna-XM_027459112.1
FAR2	NC_040046.1	134747605	134747666	peak_740	62	+	utr3	rna-XM_027457636.1
SLC10A1	NC_040050.1	40915522	40916045	peak_7405	524	+	PR_intron	rna-XM_013101459.3
RASGRP1	NC_040050.1	44057651	44059064	peak_7429	1414	+	PR_intron	rna-XM_027457831.1
RASGRP1	NC_040050.1	44059153	44059304	peak_7430	152	+	utr3	rna-XM_027457831.1
c01f1a2e-cff4-4999-8d7f-83681f4a1b17	NC_040050.1	47940547	47940638	peak_7445	92	+	NP_exon	c01f1a2e-cff4-4999-8d7f-83681f4a1b17.trans
PNPLA2	NC_040050.1	50179227	50179377	peak_7469	151	+	utr3	rna-XM_027457471.1
58c7a679-216b-4a68-901c-cc7918adf875	NC_040050.1	51301525	51301706	peak_7481	182	+	NP_exon	58c7a679-216b-4a68-901c-cc7918adf875.trans
58c7a679-216b-4a68-901c-cc7918adf875	NC_040050.1	51301506	51301686	peak_7482	181	+	NP_exon	58c7a679-216b-4a68-901c-cc7918adf875.trans
ALKBH3	NC_040050.1	56232899	56233049	peak_7513	151	+	utr3	rna-XM_027459192.1
ELP4	NC_040050.1	62206172	62206352	peak_7563	181	+	utr3	rna-XM_027459066.1
CACNB4	NC_040050.1	2738238	2741075	peak_7624	2838	-	PR_intron	rna-XM_021274275.2
MAP4K5	NC_040050.1	7020756	7022790	peak_7659	2035	-	PR_intron	rna-XM_027459541.1
DNM1L	NC_040046.1	141262104	141262314	peak_776	211	+	utr3	rna-XM_027443342.1
BDKRB1	NC_040050.1	18814965	18815114	peak_7775	150	-	cds	rna-XM_005020773.4
BATF	NC_040050.1	28178356	28178476	peak_7829	121	-	utr5	rna-XM_027458919.1
de030ec8-9db7-4ab2-8ce8-ee97b86a294b	NC_040050.1	28252907	28253057	peak_7832	151	-	NP_exon	de030ec8-9db7-4ab2-8ce8-ee97b86a294b.trans
de030ec8-9db7-4ab2-8ce8-ee97b86a294b	NC_040050.1	28252935	28253055	peak_7833	121	-	NP_exon	de030ec8-9db7-4ab2-8ce8-ee97b86a294b.trans
CHKA	NC_040050.1	30872761	30872941	peak_7876	181	-	utr3	rna-XM_027457812.1
LOC101799861	NC_040050.1	33306007	33307234	peak_7900	1228	-	PR_intron	rna-XM_013099809.3
PTPRJ	NC_040050.1	33480312	33480402	peak_7903	91	-	utr3	rna-XM_027458267.1
LOC101796911	NC_040050.1	34470587	34471131	peak_7914	545	-	PR_intron	rna-XM_027458998.1
GCHFR	NC_040050.1	35471182	35471242	peak_7931	61	-	PR_intron	rna-XM_027458301.1
GCHFR	NC_040050.1	35474219	35474370	peak_7932	152	-	PR_intron	rna-XM_027458301.1
EXD1	NC_040050.1	37321665	37321792	peak_7957	128	-	cds	rna-XM_027458112.1
OIP5	NC_040050.1	37377400	37378355	peak_7958	956	-	PR_intron	rna-XM_027458117.1
LOC101794571	NC_040050.1	38271024	38271174	peak_7971	151	-	utr3	rna-XM_027459501.1
SMOC1	NC_040050.1	40752605	40752666	peak_8019	62	-	utr3	rna-XM_021273775.2
PLEK2	NC_040050.1	42110172	42111183	peak_8033	1012	-	NP_intron	rna-XR_003497844.1
SPTSSA	NC_040050.1	49766572	49766721	peak_8070	150	-	utr3	rna-XM_027458595.1
5f7d436f-ded9-4b90-b56f-b1398d644e59	NC_040050.1	49782444	49782589	peak_8072	146	-	NP_exon	5f7d436f-ded9-4b90-b56f-b1398d644e59.trans
5f7d436f-ded9-4b90-b56f-b1398d644e59	NC_040050.1	49782431	49782582	peak_8073	152	-	NP_exon	5f7d436f-ded9-4b90-b56f-b1398d644e59.trans
SNX6	NC_040050.1	49806551	49806642	peak_8074	92	-	utr5	rna-XM_027458224.1
COMMD9	NC_040050.1	53699502	53700483	peak_8102	982	-	PR_intron	rna-XM_027458516.1
RAG2	NC_040050.1	53825548	53825609	peak_8104	62	-	cds	rna-XM_021266755.2
RAG2	NC_040050.1	53825529	53825620	peak_8105	92	-	cds	rna-XM_021266755.2
FAM180B	NC_040050.1	57445368	57445548	peak_8113	181	-	utr5	rna-XM_005019239.4
PTPMT1	NC_040050.1	57461240	57461391	peak_8114	152	-	cds	rna-XM_027458130.1
RFX4	NC_040046.1	146632217	146632367	peak_814	151	+	cds	rna-XM_027449764.1
MPEG1	NC_040050.1	57967341	57967520	peak_8140	180	-	cds	rna-XM_027457825.1
MPPED2	NC_040050.1	61644279	61644542	peak_8157	264	-	PR_intron	rna-XM_027458234.1
8dcc3865-dea9-4d35-9d0c-a79674f53151	NC_040051.1	4199910	4199970	peak_8178	61	+	NP_exon	8dcc3865-dea9-4d35-9d0c-a79674f53151.trans
FAM204A	NC_040051.1	6604650	6605694	peak_8196	1045	+	PR_intron	rna-XM_005021117.3
FAM204A	NC_040051.1	6618326	6618811	peak_8197	486	+	PR_intron	rna-XM_005021117.3
LOC101801251	NC_040051.1	16597985	16598076	peak_8271	92	+	utr5	rna-XM_027460621.1
ANKRD1	NC_040051.1	17496001	17496091	peak_8281	91	+	utr3	rna-XM_005013592.4
SLC16A12	NC_040051.1	18097421	18097481	peak_8284	61	+	cds	rna-XM_027459767.1
CH25H	NC_040051.1	18136139	18136318	peak_8285	180	+	cds	rna-XM_005029425.4
NCF4	NC_040046.1	148783108	148784138	peak_835	1031	+	PR_intron	rna-XM_005015993.4
LOC101793887	NC_040046.1	148799188	148799308	peak_836	121	+	cds	rna-XM_021269883.2
SFTPA	NC_040051.1	26628000	26628150	peak_8361	151	+	cds	rna-XM_005015757.4
LOC101793887	NC_040046.1	148800832	148800923	peak_837	92	+	utr3	rna-XM_021269883.2
LOC113843933	NC_040051.1	29076916	29077097	peak_8378	182	+	utr5	rna-XM_027459765.1
ZNF511	NC_040051.1	29446727	29446787	peak_8379	61	+	utr3	rna-XM_027460589.1
ZNF511	NC_040051.1	29447232	29447322	peak_8380	91	+	utr3	rna-XM_027460589.1
ZNF511	NC_040051.1	29447678	29447827	peak_8381	150	+	utr3	rna-XM_027460589.1
ASCC1	NC_040051.1	32336342	32336855	peak_8403	514	+	PR_intron	rna-XM_027460244.1
EIF4EBP2	NC_040051.1	32378659	32378749	peak_8405	91	+	cds	rna-XM_027460510.1
EIF4EBP2	NC_040051.1	32380658	32380778	peak_8406	121	+	utr3	rna-XM_027460510.1
LHPP	NC_040051.1	3885490	3885610	peak_8433	121	-	cds	rna-XM_027460745.1
PLEKHA1	NC_040051.1	4742575	4742785	peak_8435	211	-	utr3	rna-XM_027460138.1
PLEKHA1	NC_040051.1	4743412	4745674	peak_8436	2263	-	PR_intron	rna-XM_027460138.1
WDR11	NC_040051.1	5421640	5424055	peak_8440	2416	-	PR_intron	rna-XM_027460318.1
4be60a77-cabb-4091-90e1-4a1550b77c9b	NC_040051.1	10465497	10465588	peak_8473	92	-	NP_exon	4be60a77-cabb-4091-90e1-4a1550b77c9b.trans
LDB1	NC_040051.1	14508377	14509099	peak_8519	723	-	PR_intron	rna-XM_027460563.1
HECTD2	NC_040051.1	17319667	17320381	peak_8555	715	-	PR_intron	rna-XM_027460292.1
WDFY4	NC_040051.1	18948291	18948441	peak_8568	151	-	utr3	rna-XM_013102123.3
SNCG	NC_040051.1	28595411	28602299	peak_8629	6889	-	PR_intron	rna-XM_027460012.1
CISD1	NC_040051.1	31998703	31998852	peak_8642	150	-	utr3	rna-XM_027460778.1
NPFFR1	NC_040051.1	32375041	32375282	peak_8649	242	-	utr5	rna-XM_027460247.1
LRRC20	NC_040051.1	32377313	32377431	peak_8650	119	-	utr5	rna-XM_027460254.1
PCBD1	NC_040051.1	32489542	32489633	peak_8651	92	-	utr3	rna-XM_005028336.3
PCBD1	NC_040051.1	32491017	32493200	peak_8652	2184	-	PR_intron	rna-XM_005028336.3
VPS26A	NC_040051.1	33160604	33160725	peak_8669	122	-	cds	rna-XM_027460079.1
DNAH7	NC_040052.1	6276523	6276644	peak_8756	122	+	cds	rna-XM_027461817.1
DNAH7	NC_040052.1	6326603	6326694	peak_8757	92	+	cds	rna-XM_027461817.1
TFPI	NC_040052.1	9394633	9394694	peak_8777	62	+	cds	rna-XM_027461588.1
FRZB	NC_040052.1	10780918	10780979	peak_8780	62	+	cds	rna-XM_027461513.1
UNC80	NC_040052.1	11133256	11134218	peak_8788	963	+	PR_intron	rna-XM_027461360.1
UNC80	NC_040052.1	11134074	11134221	peak_8789	148	+	cds	rna-XM_027461360.1
VWC2L	NC_040052.1	12844551	12844672	peak_8791	122	+	PR_intron	rna-XM_021273891.2
774b90e6-6e7c-4431-a3a4-494fc24ed952	NC_040052.1	15500789	15500910	peak_8807	122	+	NP_exon	774b90e6-6e7c-4431-a3a4-494fc24ed952.trans
774b90e6-6e7c-4431-a3a4-494fc24ed952	NC_040052.1	15500801	15500891	peak_8808	91	+	NP_exon	774b90e6-6e7c-4431-a3a4-494fc24ed952.trans
CCDC141	NC_040052.1	19940345	19942962	peak_8885	2618	+	PR_intron	rna-XM_027461943.1
a56109f2-988e-4dad-8193-f887b235c172	NC_040052.1	19950947	19951097	peak_8886	151	+	NP_exon	a56109f2-988e-4dad-8193-f887b235c172.trans
a56109f2-988e-4dad-8193-f887b235c172	NC_040052.1	19950945	19951126	peak_8887	182	+	NP_exon	a56109f2-988e-4dad-8193-f887b235c172.trans
LNPK	NC_040052.1	21299404	21305279	peak_8963	5876	+	PR_intron	rna-XM_027461235.1
CHRNA1	NC_040052.1	21749203	21749412	peak_8967	210	+	utr5	rna-XM_027461600.1
METTL8	NC_040052.1	23089006	23094214	peak_8981	5209	+	PR_intron	rna-XM_027461928.1
d1616eca-0643-4ca3-8247-dfefe77a7c6d	NC_040052.1	28849760	28849880	peak_9055	121	+	NP_exon	d1616eca-0643-4ca3-8247-dfefe77a7c6d.trans
TFCP2L1	NC_040052.1	29784264	29785540	peak_9063	1277	+	PR_intron	rna-XM_005017516.3
CXCR4	NC_040052.1	32943948	32944812	peak_9066	865	+	PR_intron	rna-XM_027461870.1
LCT	NC_040052.1	33055618	33055679	peak_9068	62	+	cds	rna-XM_021272952.2
LCT	NC_040052.1	33068550	33068641	peak_9069	92	+	utr3	rna-XM_021272952.2
ATG9A	NC_040052.1	36045079	36045140	peak_9092	62	+	cds	rna-XM_027461674.1
ZFAND2B	NC_040052.1	36103845	36104388	peak_9096	544	+	PR_intron	rna-XM_027460989.1
MARCH4	NC_040052.1	37288773	37288833	peak_9112	61	+	cds	rna-XM_027461527.1
MARCH4	NC_040052.1	37288892	37288953	peak_9113	62	+	cds	rna-XM_027461527.1
C7H11orf16	NC_040052.1	2308721	2308931	peak_9127	211	-	utr3	rna-XM_027461915.1
ASCL3	NC_040052.1	2317543	2317663	peak_9128	121	-	cds	rna-XM_027461917.1
MRVI1	NC_040052.1	3074211	3078194	peak_9135	3984	-	PR_intron	rna-XM_027461631.1
LOC106014283	NC_040052.1	4520664	4520815	peak_9146	152	-	cds	rna-XM_021268893.2
LOC106014283	NC_040052.1	4528606	4528667	peak_9147	62	-	utr5	rna-XM_021268893.2
AOX1	NC_040052.1	4724191	4726504	peak_9153	2314	-	PR_intron	rna-XM_027461580.1
GLS	NC_040052.1	8149655	8149775	peak_9164	121	-	utr3	rna-XM_027460936.1
GLS	NC_040052.1	8149653	8149773	peak_9165	121	-	utr3	rna-XM_027460936.1
ACADL	NC_040052.1	11206434	11206495	peak_9192	62	-	utr3	rna-XM_027461394.1
RAMP1	NC_040052.1	13273257	13273407	peak_9200	151	-	utr3	rna-XM_005027104.4
TMEM237	NC_040052.1	16124808	16125050	peak_9237	243	-	PR_intron	rna-XM_027461331.1
PLEKHA3	NC_040052.1	20230605	20234875	peak_9275	4271	-	PR_intron	rna-XM_027462065.1
ITGA6	NC_040052.1	22718762	22718882	peak_9289	121	-	utr3	rna-XM_027462271.1
DLX1	NC_040052.1	22854146	22854356	peak_9290	211	-	utr3	rna-XM_005018916.3
HAT1	NC_040052.1	22914011	22914071	peak_9292	61	-	cds	rna-XM_005018918.4
HAT1	NC_040052.1	22933133	22933332	peak_9293	200	-	PR_intron	rna-XM_027461856.1
PDIA5	NC_040052.1	28883677	28883886	peak_9335	210	-	utr3	rna-XM_027461140.1
SLC15A2	NC_040052.1	29388424	29388635	peak_9337	212	-	utr3	rna-XM_013097562.3
SLC15A2	NC_040052.1	29395320	29395561	peak_9338	242	-	utr3	rna-XM_013097562.3
SLC15A2	NC_040052.1	29435798	29435889	peak_9339	92	-	PR_intron	rna-XM_027462083.1
cf6bb419-9206-47fa-8204-0ac72074f8fe	NC_040052.1	36080859	36080919	peak_9375	61	-	NP_exon	cf6bb419-9206-47fa-8204-0ac72074f8fe.trans
cf6bb419-9206-47fa-8204-0ac72074f8fe	NC_040052.1	36080833	36080894	peak_9376	62	-	NP_exon	cf6bb419-9206-47fa-8204-0ac72074f8fe.trans
PRKAG3	NC_040052.1	36234754	36234985	peak_9381	232	-	PR_intron	rna-XM_027461284.1
PLCD4	NC_040052.1	36291413	36291533	peak_9384	121	-	cds	rna-XM_027461297.1
63327ff9-73ca-4fe3-aac9-f1b5b148a5c9	NC_040052.1	36297791	36297909	peak_9385	119	-	NP_exon	63327ff9-73ca-4fe3-aac9-f1b5b148a5c9.trans
63327ff9-73ca-4fe3-aac9-f1b5b148a5c9	NC_040052.1	36297811	36297871	peak_9386	61	-	NP_exon	63327ff9-73ca-4fe3-aac9-f1b5b148a5c9.trans
CNOT9	NC_040052.1	36305271	36305392	peak_9387	122	-	utr5	rna-XM_027461298.1
CTDSP1	NC_040052.1	36353128	36353219	peak_9388	92	-	utr5	rna-XM_027461299.1
LOC101800190	NC_040053.1	207756	207847	peak_9405	92	+	cds	rna-XM_027463818.1
SLC44A5	NC_040053.1	4378495	4378556	peak_9435	62	+	utr3	rna-XM_027462789.1
WLS	NC_040053.1	5773589	5773649	peak_9444	61	+	utr3	rna-XM_013102234.3
PDZK1IP1	NC_040053.1	13348625	13349000	peak_9513	376	+	PR_intron	rna-XM_027463525.1
TMEM275	NC_040053.1	13492250	13492431	peak_9520	182	+	utr3	rna-XM_027463221.1
TMEM275	NC_040053.1	13493179	13493240	peak_9521	62	+	utr3	rna-XM_027463221.1
PRDX1	NC_040053.1	14192697	14192757	peak_9531	61	+	utr5	rna-XM_027463213.1
LOC101796281	NC_040046.1	159175232	159175463	peak_954	232	+	PR_intron	rna-XM_027453211.1
ARMH1	NC_040053.1	14632807	14633213	peak_9540	407	+	PR_intron	rna-XM_027462760.1
LOC101803802	NC_040053.1	15023971	15024181	peak_9544	211	+	NP_exon	rna-XR_003498728.1
LOC101800205	NC_040053.1	26854551	26854732	peak_9663	182	+	utr3	rna-XM_021268713.2
2f063499-0db0-4f04-a866-3c7a79e8236e	NC_040053.1	26961637	26961697	peak_9676	61	+	NP_exon	2f063499-0db0-4f04-a866-3c7a79e8236e.trans
2f063499-0db0-4f04-a866-3c7a79e8236e	NC_040053.1	26961610	26961698	peak_9677	89	+	NP_exon	2f063499-0db0-4f04-a866-3c7a79e8236e.trans
BCAR3	NC_040053.1	35396738	35406192	peak_9741	9455	+	PR_intron	rna-XM_005026553.4
SLC16A9	NC_040053.1	1368683	1368892	peak_9757	210	-	cds	rna-XM_013095819.3
EFCAB7	NC_040053.1	6810239	6810574	peak_9796	336	-	PR_intron	rna-XM_005022887.4
NSUN4	NC_040053.1	13687180	13687271	peak_9845	92	-	cds	rna-XM_027463273.1
RAD54L	NC_040053.1	13720001	13720246	peak_9847	246	-	PR_intron	rna-XM_027462825.1
MMACHC	NC_040053.1	14209992	14210112	peak_9858	121	-	PR_intron	rna-XM_027463210.1
HPDL	NC_040053.1	14331638	14331788	peak_9863	151	-	utr3	rna-XM_027462537.1
ADGRL4	NC_040053.1	17077268	17077388	peak_9896	121	-	utr5	rna-XM_027462411.1
LPAR3	NC_040053.1	19258704	19258825	peak_9900	122	-	utr3	rna-XM_005022293.4
LPAR3	NC_040053.1	19260049	19260140	peak_9901	92	-	cds	rna-XM_005022293.4
LPAR3	NC_040053.1	19265583	19270793	peak_9902	5211	-	PR_intron	rna-XM_005022293.4
PTGS2	NC_040053.1	21992904	21993085	peak_9931	182	-	utr3	rna-XM_027462438.1
