# Supplementary material for: Profiling Analysis of N6-Methyladenosine mRNA Methylation Reveals Differential m6A Patterns during the Embryonic Skeletal Muscle Development of Ducks
Source: Animals (Basel). 2022 Sep 28;12(19):2593. doi: 10.3390/ani12192593 (PMC9559603; doi:10.3390/ani12192593)
Supplement: Supplementary file 1 [file animals-12-02593-s001.zip › Table S5.xls]

Term	Ontology	ID	Input_number	Background_number	Rich_factor	P_Value	FDR	Input	Hyperlink
RNA splicing, via transesterification reactions	biological_process	GO:0000375	32	44	0.855864893	0.00015	0.012292308	69b3ab3d-4505-4968-a1c2-552d71aee42e|AAR2|AQR|CDC40|CELF2|CWC15|DHX40|DHX8|GEMIN8|HNRNPM|HTATSF1|ISY1|LOC101798009|LOC113844723|LUC7L|LUC7L3|PRPF3|PRPF40A|PRPF6|PRPF8|SF3A2|SF3A3|SF3B1|SF3B3|SNRNP200|SNRPB2|SNRPD1|SNRPD3|SNRPF|SNW1|SREK1|TXNL4B	http://amigo.geneontology.org/amigo/term/GO:0000375
RNA splicing, via transesterification reactions with bulged adenosine as nucleophile	biological_process	GO:0000377	32	44	0.855864893	0.00015	0.012292308	69b3ab3d-4505-4968-a1c2-552d71aee42e|AAR2|AQR|CDC40|CELF2|CWC15|DHX40|DHX8|GEMIN8|HNRNPM|HTATSF1|ISY1|LOC101798009|LOC113844723|LUC7L|LUC7L3|PRPF3|PRPF40A|PRPF6|PRPF8|SF3A2|SF3A3|SF3B1|SF3B3|SNRNP200|SNRPB2|SNRPD1|SNRPD3|SNRPF|SNW1|SREK1|TXNL4B	http://amigo.geneontology.org/amigo/term/GO:0000377
mRNA splicing, via spliceosome	biological_process	GO:0000398	32	44	0.855864893	0.00015	0.012292308	69b3ab3d-4505-4968-a1c2-552d71aee42e|AAR2|AQR|CDC40|CELF2|CWC15|DHX40|DHX8|GEMIN8|HNRNPM|HTATSF1|ISY1|LOC101798009|LOC113844723|LUC7L|LUC7L3|PRPF3|PRPF40A|PRPF6|PRPF8|SF3A2|SF3A3|SF3B1|SF3B3|SNRNP200|SNRPB2|SNRPD1|SNRPD3|SNRPF|SNW1|SREK1|TXNL4B	http://amigo.geneontology.org/amigo/term/GO:0000398
cellular aromatic compound metabolic process	biological_process	GO:0006725	433	862	0.591137542	0.00017	0.013251707	04fa9dce-dc3a-4b00-90c6-89990774e24d|252d3981-8a9d-4cb3-8159-0d5cd1c32c16|4568fa11-bb65-42fe-910f-67d9665cb647|4b498d98-ca4b-4123-9d28-34337916beda|657aad42-7332-4252-b03c-d90c32d100da|69b3ab3d-4505-4968-a1c2-552d71aee42e|8647195e-ba82-4e3b-8eaa-9c82e3edc575|a56e8f2e-fc94-45ea-b49c-dd6fc80d8b68|a965c8c2-4135-4773-af63-c6855c307e80|AAR2|AARS|ADA|ADAT1|ADAT2|ADSS|ADSSL1|ae64c188-4378-4662-abf3-22d4…	http://amigo.geneontology.org/amigo/term/GO:0006725
cellular component organization or biogenesis	biological_process	GO:0071840	257	490	0.617227054	0.00017	0.013251707	0c363208-761b-44f3-99d0-e2f2596d6366|17e18fec-4e62-48a7-85c7-a17f46c76609|1961e84c-aa73-4203-8ad1-36b9def555b5|204da7fd-91a7-4c54-a6f6-66a386b5cf17|371b58f5-04cd-40d9-a0a5-0310dcdec9e0|4568fa11-bb65-42fe-910f-67d9665cb647|4ca81fc3-6c21-4e25-bdf9-cf78ad94ed3e|57f7a64a-d428-427a-9011-899e91a22b36|62297c41-98fc-4ea9-bbff-d3eaaf8c3467|72b8c39a-4b1b-469e-82fb-92999f428fe0|96a811c1-6931-43fc-a2b5-f6eaa…	http://amigo.geneontology.org/amigo/term/GO:0071840
heterocycle metabolic process	biological_process	GO:0046483	435	869	0.589084222	0.00025	0.018581395	04fa9dce-dc3a-4b00-90c6-89990774e24d|252d3981-8a9d-4cb3-8159-0d5cd1c32c16|4568fa11-bb65-42fe-910f-67d9665cb647|4b498d98-ca4b-4123-9d28-34337916beda|657aad42-7332-4252-b03c-d90c32d100da|69b3ab3d-4505-4968-a1c2-552d71aee42e|8647195e-ba82-4e3b-8eaa-9c82e3edc575|9253c9db-3192-42dd-af3e-0e3932e13f2f|a56e8f2e-fc94-45ea-b49c-dd6fc80d8b68|a965c8c2-4135-4773-af63-c6855c307e80|AAR2|AARS|ADA|ADAT1|ADAT2|ADS…	http://amigo.geneontology.org/amigo/term/GO:0046483
regulation of cellular metabolic process	biological_process	GO:0031323	200	374	0.629312422	0.00025	0.018581395	04fa9dce-dc3a-4b00-90c6-89990774e24d|252d3981-8a9d-4cb3-8159-0d5cd1c32c16|4b498d98-ca4b-4123-9d28-34337916beda|657aad42-7332-4252-b03c-d90c32d100da|69b3ab3d-4505-4968-a1c2-552d71aee42e|8647195e-ba82-4e3b-8eaa-9c82e3edc575|a56e8f2e-fc94-45ea-b49c-dd6fc80d8b68|AES|AKAP17A|ANKRD49|ARID2|ARID4B|ARID5B|ATF1|ATF3|BARX2|BATF3|bef8fa78-c9af-4cd7-b583-113b96fdb6c8|BSX|BUB1B|CAAP1|CBFA2T2|CBFA2T3|CBX3|CCNY…	http://amigo.geneontology.org/amigo/term/GO:0031323
organelle organization	biological_process	GO:0006996	153	279	0.645349738	0.00031	0.022016889	0c363208-761b-44f3-99d0-e2f2596d6366|204da7fd-91a7-4c54-a6f6-66a386b5cf17|62297c41-98fc-4ea9-bbff-d3eaaf8c3467|72b8c39a-4b1b-469e-82fb-92999f428fe0|ABLIM1|ACBD5|ACTL6A|ACTR3B|ARID1A|ARID1B|ARPC5|ARPC5L|ATAD3A|BAZ1A|BRD1|BRPF3|BUB1B|CABIN1|CAPZA2|CENPC|CENPH|CENPI|CENPK|CENPO|CENPP|CENPT|CEP350|CEP57|CEP78|CHAF1A|CHAF1B|CHCHD1|CLUH|CROCC|CSPG5|DAAM1|DAAM2|DAG1|DARS2|DDHD1|DIAPH3|DMTN|DNAJC11|DNAL1…	http://amigo.geneontology.org/amigo/term/GO:0006996
RNA splicing	biological_process	GO:0008380	41	61	0.790973498	0.00031	0.022016889	69b3ab3d-4505-4968-a1c2-552d71aee42e|AAR2|AKAP17A|AQR|CDC40|CELF2|CWC15|DHX40|DHX8|GEMIN8|HNRNPM|HTATSF1|ISY1|LOC101798009|LOC101799930|LOC113844723|LUC7L|LUC7L3|PRPF18|PRPF3|PRPF40A|PRPF6|PRPF8|RBM20|RP9|SF3A2|SF3A3|SF3B1|SF3B3|SNRNP200|SNRPB2|SNRPD1|SNRPD3|SNRPF|SNW1|SREK1|SRSF11|TSEN2|TSEN54|TXNL4B|ZNF638	http://amigo.geneontology.org/amigo/term/GO:0008380
regulation of macromolecule metabolic process	biological_process	GO:0060255	205	386	0.624992012	0.00034	0.02312	04fa9dce-dc3a-4b00-90c6-89990774e24d|252d3981-8a9d-4cb3-8159-0d5cd1c32c16|4b498d98-ca4b-4123-9d28-34337916beda|657aad42-7332-4252-b03c-d90c32d100da|69b3ab3d-4505-4968-a1c2-552d71aee42e|8647195e-ba82-4e3b-8eaa-9c82e3edc575|a56e8f2e-fc94-45ea-b49c-dd6fc80d8b68|AES|AKAP17A|ANKRD49|ARID2|ARID4B|ARID5B|ATF1|ATF3|BARX2|BATF3|bef8fa78-c9af-4cd7-b583-113b96fdb6c8|BSX|BUB1B|CAAP1|CBFA2T2|CBFA2T3|CBX3|CCNY…	http://amigo.geneontology.org/amigo/term/GO:0060255
protein catabolic process	biological_process	GO:0030163	37	54	0.806335675	0.00034	0.02312	79da57f9-7126-4f66-97fc-a1906cff5fcb|ABHD13|BAP1|BUB1B|CUL5|DDA1|EDEM3|ELOC|ERLEC1|ERLIN2|FBXL22|FOXRED2|LOC101801212|LOC101801987|LOC101805398|LOC113840922|PSMA4|PSMA7|PSMB2|PSMB3|PSMC1|PSMC2|PSMC6|PSMD1|PSMD2|PSMD6|RNF150|SMURF1|SMURF2|SNF8|TRPC4AP|UBAP1|UBE3A|UBR1|UBR4|UFD1|WWP2	http://amigo.geneontology.org/amigo/term/GO:0030163
proteolysis	biological_process	GO:0006508	44	67	0.772833225	0.00042	0.027965	79da57f9-7126-4f66-97fc-a1906cff5fcb|BAP1|BUB1B|C1R|CAAP1|CUL5|DDA1|ELOC|ERLIN2|FBXL22|FOXRED2|GPS1|JOSD1|LOC101801212|LOC101801987|LOC101805398|LOC113840922|MINDY2|MIPEP|OTUD7A|PMPCA|PSMA4|PSMA7|PSMB2|PSMB3|PSMD6|RNF150|SEC11A|SEC11C|SENP5|SMURF1|SMURF2|SNF8|SPCS2|SPPL2B|TRPC4AP|UBAP1|UBE3A|UBR1|UBR4|UFD1|USP53|USP54|WWP2	http://amigo.geneontology.org/amigo/term/GO:0006508
negative regulation of biological process	biological_process	GO:0048519	82	139	0.694235732	0.00043	0.028046531	9d4814c9-1e21-41f4-bb5f-8cad1caa430b|ac1c2d4e-dafd-4642-a48a-efa9374b5ecf|ADNP|ANXA5|ASTN2|ATP5IF1|BTG1|BUB1B|CAAP1|CAPZA2|CBFA2T2|CBFA2T3|CBX3|cdd244ad-b5e6-49ff-acaf-5bc56b6d6b34|CIR1|CREM|CXXC5|DDIT4|DGCR8|DLK1|ELFN2|ERLEC1|FAIM|FAM3C|FKBP15|GATAD2A|GMFB|HECA|HEXIM1|HHATL|ID2|ID3|INVS|KANK3|LIMD1|LMOD3|LOC101792346|LOC101793178|LZTFL1|MAEA|MMP28|MTERF3|MXI1|MYCN|NELFA|NELFCD|NKRF|PARPBP|PCIF1|…	http://amigo.geneontology.org/amigo/term/GO:0048519
transcription from RNA polymerase II promoter	biological_process	GO:0006366	53	84	0.742513739	0.00049	0.0313208	a56e8f2e-fc94-45ea-b49c-dd6fc80d8b68|ATF1|ATF3|BATF3|CHD6|CREM|CTDP1|CXXC5|ELL2|EPC1|EPC2|ETV4|FOSL2|GABPB2|GLIS3|GTF2A2|GTF2IRD1|HEXIM1|HSF2|JUND|LDB2|LOC101793178|MED1|MED10|MED12L|MED13L|MED20|MED22|MED6|MED9|MITF|MLLT10|MLXIP|MRTFA|MXI1|NELFA|NFAT5|PHF12|PLAGL1|POLR2B|POLR2C|PRDM4|RFX5|SP4|SUPT3H|TAF11|TAF5|TAF7L|TCERG1|TEF|UBP1|ZBTB2|ZNF704	http://amigo.geneontology.org/amigo/term/GO:0006366
regulation of primary metabolic process	biological_process	GO:0080090	198	374	0.623019297	0.00055	0.034466667	04fa9dce-dc3a-4b00-90c6-89990774e24d|252d3981-8a9d-4cb3-8159-0d5cd1c32c16|4b498d98-ca4b-4123-9d28-34337916beda|657aad42-7332-4252-b03c-d90c32d100da|69b3ab3d-4505-4968-a1c2-552d71aee42e|8647195e-ba82-4e3b-8eaa-9c82e3edc575|a56e8f2e-fc94-45ea-b49c-dd6fc80d8b68|AES|AKAP17A|ANKRD49|ARID2|ARID4B|ARID5B|ATF1|ATF3|BARX2|BATF3|bef8fa78-c9af-4cd7-b583-113b96fdb6c8|BSX|BUB1B|CAAP1|CBFA2T2|CBFA2T3|CBX3|CCNY…	http://amigo.geneontology.org/amigo/term/GO:0080090
cellular component organization	biological_process	GO:0016043	236	454	0.611736031	0.00065	0.03995	0c363208-761b-44f3-99d0-e2f2596d6366|17e18fec-4e62-48a7-85c7-a17f46c76609|1961e84c-aa73-4203-8ad1-36b9def555b5|204da7fd-91a7-4c54-a6f6-66a386b5cf17|4ca81fc3-6c21-4e25-bdf9-cf78ad94ed3e|57f7a64a-d428-427a-9011-899e91a22b36|62297c41-98fc-4ea9-bbff-d3eaaf8c3467|72b8c39a-4b1b-469e-82fb-92999f428fe0|9b5a9b49-1d58-4bef-b11b-bd16006eb2e5|A4GALT|AAR2|ABLIM1|ACBD5|ACTL6A|ACTR3B|AJM1|ANO4|ARID1A|ARID1B|ARP…	http://amigo.geneontology.org/amigo/term/GO:0016043
cellular macromolecule biosynthetic process	biological_process	GO:0034645	348	693	0.590954331	0.00094	0.056683774	04fa9dce-dc3a-4b00-90c6-89990774e24d|252d3981-8a9d-4cb3-8159-0d5cd1c32c16|4b498d98-ca4b-4123-9d28-34337916beda|657aad42-7332-4252-b03c-d90c32d100da|68950849-e697-469c-ab95-2a8d5a3d66fe|8647195e-ba82-4e3b-8eaa-9c82e3edc575|a56e8f2e-fc94-45ea-b49c-dd6fc80d8b68|AARS|AES|ALG2|ALG3|ALG6|ANKRD49|ARID2|ARID4B|ARID5B|ATF1|ATF3|B3GALNT2|B3GALT6|B3GAT1|B3GNT4|B3GNT7|B3GNT9|B4GALT5|BARX2|BATF3|BSX|CARS|CARS…	http://amigo.geneontology.org/amigo/term/GO:0034645
macromolecule biosynthetic process	biological_process	GO:0009059	351	700	0.590088277	0.00102	0.05896069	04fa9dce-dc3a-4b00-90c6-89990774e24d|252d3981-8a9d-4cb3-8159-0d5cd1c32c16|4b498d98-ca4b-4123-9d28-34337916beda|657aad42-7332-4252-b03c-d90c32d100da|68950849-e697-469c-ab95-2a8d5a3d66fe|8647195e-ba82-4e3b-8eaa-9c82e3edc575|89d901f8-fb1e-459d-8f8f-8f6dea65ea0a|a56e8f2e-fc94-45ea-b49c-dd6fc80d8b68|AARS|AES|ALG2|ALG3|ALG6|ANKRD49|ARID2|ARID4B|ARID5B|ATF1|ATF3|B3GALNT2|B3GALT6|B3GAT1|B3GNT4|B3GNT7|B3G…	http://amigo.geneontology.org/amigo/term/GO:0009059
ribonucleoprotein complex biogenesis	biological_process	GO:0022613	37	56	0.777537972	0.001	0.05896069	371b58f5-04cd-40d9-a0a5-0310dcdec9e0|4568fa11-bb65-42fe-910f-67d9665cb647|96a811c1-6931-43fc-a2b5-f6eaa9c9c9fa|AAR2|BMS1|BUD23|CELF2|EIF3J|FTSJ3|G3BP2|GEMIN8|ISY1|KRR1|LUC7L|LUC7L3|MDN1|NMD3|NOC4L|NOP2|PES1|PRPF3|RBFA|REXO4|RRP36|RRP9|SBDS|SF3A2|SF3B1|SNRPD1|SNRPD3|SNRPF|SURF6|TSR1|UTP14A|UTP20|UTP23|WDR55	http://amigo.geneontology.org/amigo/term/GO:0022613
ubiquitin-dependent protein catabolic process	biological_process	GO:0006511	28	40	0.82376996	0.00107	0.05896069	79da57f9-7126-4f66-97fc-a1906cff5fcb|BAP1|BUB1B|CUL5|DDA1|ELOC|ERLIN2|FBXL22|FOXRED2|LOC101801212|LOC101801987|LOC101805398|LOC113840922|PSMA4|PSMA7|PSMB3|PSMD6|RNF150|SMURF1|SMURF2|SNF8|TRPC4AP|UBAP1|UBE3A|UBR1|UBR4|UFD1|WWP2	http://amigo.geneontology.org/amigo/term/GO:0006511
modification-dependent protein catabolic process	biological_process	GO:0019941	28	40	0.82376996	0.00107	0.05896069	79da57f9-7126-4f66-97fc-a1906cff5fcb|BAP1|BUB1B|CUL5|DDA1|ELOC|ERLIN2|FBXL22|FOXRED2|LOC101801212|LOC101801987|LOC101805398|LOC113840922|PSMA4|PSMA7|PSMB3|PSMD6|RNF150|SMURF1|SMURF2|SNF8|TRPC4AP|UBAP1|UBE3A|UBR1|UBR4|UFD1|WWP2	http://amigo.geneontology.org/amigo/term/GO:0019941
modification-dependent macromolecule catabolic process	biological_process	GO:0043632	28	40	0.82376996	0.00107	0.05896069	79da57f9-7126-4f66-97fc-a1906cff5fcb|BAP1|BUB1B|CUL5|DDA1|ELOC|ERLIN2|FBXL22|FOXRED2|LOC101801212|LOC101801987|LOC101805398|LOC113840922|PSMA4|PSMA7|PSMB3|PSMD6|RNF150|SMURF1|SMURF2|SNF8|TRPC4AP|UBAP1|UBE3A|UBR1|UBR4|UFD1|WWP2	http://amigo.geneontology.org/amigo/term/GO:0043632
cellular nitrogen compound metabolic process	biological_process	GO:0034641	496	1013	0.576209138	0.00116	0.06283661	04fa9dce-dc3a-4b00-90c6-89990774e24d|252d3981-8a9d-4cb3-8159-0d5cd1c32c16|4568fa11-bb65-42fe-910f-67d9665cb647|4b498d98-ca4b-4123-9d28-34337916beda|657aad42-7332-4252-b03c-d90c32d100da|69b3ab3d-4505-4968-a1c2-552d71aee42e|8647195e-ba82-4e3b-8eaa-9c82e3edc575|a56e8f2e-fc94-45ea-b49c-dd6fc80d8b68|a965c8c2-4135-4773-af63-c6855c307e80|AAR2|AARS|ADA|ADAT1|ADAT2|ADSS|ADSSL1|ae64c188-4378-4662-abf3-22d4…	http://amigo.geneontology.org/amigo/term/GO:0034641
proteolysis involved in cellular protein catabolic process	biological_process	GO:0051603	29	42	0.812562205	0.00123	0.065518	79da57f9-7126-4f66-97fc-a1906cff5fcb|BAP1|BUB1B|CUL5|DDA1|ELOC|ERLIN2|FBXL22|FOXRED2|LOC101801212|LOC101801987|LOC101805398|LOC113840922|PSMA4|PSMA7|PSMB2|PSMB3|PSMD6|RNF150|SMURF1|SMURF2|SNF8|TRPC4AP|UBAP1|UBE3A|UBR1|UBR4|UFD1|WWP2	http://amigo.geneontology.org/amigo/term/GO:0051603
enzyme linked receptor protein signaling pathway	biological_process	GO:0007167	35	53	0.777141471	0.00138	0.071022222	a00f0252-04ca-4c37-b932-f1fdc0be18f9|ANKS1A|bef8fa78-c9af-4cd7-b583-113b96fdb6c8|EFNA5|EGFR|FGF10|FGF12|FGF3|FGF7|FGF9|FLT1|FLT4|FRS3|IRS1|IRS2|IRS4|KDR|LOC101791127|LOC101797327|LOC110352107|MET|MTMR4|PDGFD|ROR1|SKOR2|SMAD1|SMAD2|SMAD3|SMAD4|SMAD5|SMAD7|SMAD9|TEK|ZFYVE28|ZFYVE9	http://amigo.geneontology.org/amigo/term/GO:0007167
ribonucleoprotein complex assembly	biological_process	GO:0022618	16	20	0.941451383	0.0014	0.071022222	AAR2|CELF2|EIF3J|G3BP2|GEMIN8|ISY1|LUC7L|LUC7L3|MDN1|PRPF3|SBDS|SF3A2|SF3B1|SNRPD1|SNRPD3|SNRPF	http://amigo.geneontology.org/amigo/term/GO:0022618
ribonucleoprotein complex subunit organization	biological_process	GO:0071826	16	20	0.941451383	0.0014	0.071022222	AAR2|CELF2|EIF3J|G3BP2|GEMIN8|ISY1|LUC7L|LUC7L3|MDN1|PRPF3|SBDS|SF3A2|SF3B1|SNRPD1|SNRPD3|SNRPF	http://amigo.geneontology.org/amigo/term/GO:0071826
Ras protein signal transduction	biological_process	GO:0007265	32	48	0.784542819	0.00174	0.08689125	ABRA|ad5ce991-c450-4184-8a1d-30a276cc21d9|ARHGEF10L|ARHGEF16|ARHGEF39|ARHGEF9|CDC42SE2|CNKSR1|CYTH3|CYTH4|FARP1|FARP2|FGD3|GBF1|GRB2|IQSEC3|KALRN|LOC101801720|NGEF|OBSCN|PLEKHG1|PLEKHG4|PRDM16|PSD2|PSD3|RALA|RALB|RAP1B|RASA3|RASGRP3|SHOC2|SPATA13	http://amigo.geneontology.org/amigo/term/GO:0007265
organic cyclic compound metabolic process	biological_process	GO:1901360	440	896	0.577899844	0.00184	0.089100606	04fa9dce-dc3a-4b00-90c6-89990774e24d|252d3981-8a9d-4cb3-8159-0d5cd1c32c16|4568fa11-bb65-42fe-910f-67d9665cb647|4b498d98-ca4b-4123-9d28-34337916beda|657aad42-7332-4252-b03c-d90c32d100da|69b3ab3d-4505-4968-a1c2-552d71aee42e|8647195e-ba82-4e3b-8eaa-9c82e3edc575|9253c9db-3192-42dd-af3e-0e3932e13f2f|a56e8f2e-fc94-45ea-b49c-dd6fc80d8b68|a965c8c2-4135-4773-af63-c6855c307e80|AAR2|AARS|ADA|ADAT1|ADAT2|ADS…	http://amigo.geneontology.org/amigo/term/GO:1901360
small GTPase mediated signal transduction	biological_process	GO:0007264	57	95	0.706088537	0.00183	0.089100606	ABRA|ad5ce991-c450-4184-8a1d-30a276cc21d9|ARHGEF10L|ARHGEF16|ARHGEF39|ARHGEF9|CDC42SE2|CNKSR1|CYTH3|CYTH4|DOCK10|DOCK11|DOCK4|DOCK7|FARP1|FARP2|FGD3|GARNL3|GBF1|GRB2|IQSEC3|KALRN|KNDC1|LOC101798976|LOC101801720|NGEF|OBSCN|PLEKHG1|PLEKHG4|PRDM16|PSD2|PSD3|RALA|RALB|RALBP1|RALGAPA1|RALGAPA2|RALGAPB|RALGDS|RAP1B|RAPGEF1|RAPGEF5|RAPGEF6|RASA3|RASGEF1A|RASGEF1C|RASGRP3|RGL1|RHOBTB1|RHOG|RHOU|RHOV|RND3…	http://amigo.geneontology.org/amigo/term/GO:0007264
intracellular signal transduction	biological_process	GO:0035556	108	196	0.648448656	0.00189	0.090155821	5a36d0b2-8a36-4f7f-85d2-3adcafae42f4|5ad0a8fe-8aee-43af-8b2a-d5840b109e92|ABRA|ad5ce991-c450-4184-8a1d-30a276cc21d9|AKAP1|AKIP1|AKT1|AKT3|ARHGAP29|ARHGAP45|ARHGEF10L|ARHGEF16|ARHGEF39|ARHGEF9|ASB2|BRAF|CDC42SE2|CNKSR1|CYTH3|CYTH4|DCLK3|DCX|DEPDC5|DOCK10|DOCK11|DOCK4|DOCK7|ERC1|FARP1|FARP2|FGD3|FMN2|GARNL3|GBF1|GRB2|GUCY1A2|IQSEC3|JAK1|JAK2|KALRN|KLC1|KNDC1|LOC101796516|LOC101798976|LOC101801563|L…	http://amigo.geneontology.org/amigo/term/GO:0035556
single-organism organelle organization	biological_process	GO:1902589	92	164	0.660164079	0.00195	0.09165	0c363208-761b-44f3-99d0-e2f2596d6366|ACBD5|ACTR3B|ARPC5|ARPC5L|BRD1|BRPF3|BUB1B|CAPZA2|CEP350|CEP57|CEP78|CHCHD1|CLUH|CROCC|DAAM1|DAAM2|DAG1|DARS2|DIAPH3|DNAJC11|DNAL1|DR1|DSCC1|EED|EPB41L1|EPB41L2|ESPN|EZH1|FASTKD5|feadf5ad-a8ac-40ed-876a-8181bc877b90|FGFR1OP|FHOD3|GFM1|GMFB|HORMAD2|KANK3|KIZ|KMT5B|LDB3|LMOD3|LOC101789642|LOC101792346|LOC101793940|LOC101801770|LOC101804876|LOC106015869|LOC113841…	http://amigo.geneontology.org/amigo/term/GO:1902589
cellular protein catabolic process	biological_process	GO:0044257	29	43	0.79366541	0.00218	0.100975072	79da57f9-7126-4f66-97fc-a1906cff5fcb|BAP1|BUB1B|CUL5|DDA1|ELOC|ERLIN2|FBXL22|FOXRED2|LOC101801212|LOC101801987|LOC101805398|LOC113840922|PSMA4|PSMA7|PSMB2|PSMB3|PSMD6|RNF150|SMURF1|SMURF2|SNF8|TRPC4AP|UBAP1|UBE3A|UBR1|UBR4|UFD1|WWP2	http://amigo.geneontology.org/amigo/term/GO:0044257
RNA biosynthetic process	biological_process	GO:0032774	203	395	0.604793135	0.00326	0.146745915	04fa9dce-dc3a-4b00-90c6-89990774e24d|252d3981-8a9d-4cb3-8159-0d5cd1c32c16|4b498d98-ca4b-4123-9d28-34337916beda|657aad42-7332-4252-b03c-d90c32d100da|8647195e-ba82-4e3b-8eaa-9c82e3edc575|a56e8f2e-fc94-45ea-b49c-dd6fc80d8b68|AES|ANKRD49|ARID2|ARID4B|ARID5B|ATF1|ATF3|BARX2|BATF3|BSX|CAVIN1|CBFA2T2|CBFA2T3|CBX3|CCNT1|CHD6|CIR1|CITED2|CRCP|CREB5|CREM|CSDE1|CTDP1|CUX1|CXXC5|DLX3|DLX4|e4b3cdd1-b969-4726-…	http://amigo.geneontology.org/amigo/term/GO:0032774
neuron projection development	biological_process	GO:0031175	13	16	0.95616156	0.00323	0.146745915	57f7a64a-d428-427a-9011-899e91a22b36|CAMSAP1|CAMSAP2|CAPRIN1|ccc14945-586a-4a6a-a706-59609f80b83e|CNTN1|DPYSL5|GRIP1|LRRC4C|MAPK6|MAPRE3|RETREG3|ZSWIM6	http://amigo.geneontology.org/amigo/term/GO:0031175
generation of neurons	biological_process	GO:0048699	16	21	0.896620364	0.00345	0.153141667	2058d621-ab91-45be-b7be-de67b56ec3f8|57f7a64a-d428-427a-9011-899e91a22b36|CAMSAP1|CAMSAP2|CAPRIN1|ccc14945-586a-4a6a-a706-59609f80b83e|CNTN1|DPYSL5|GRIP1|IGSF10|LRRC4C|MAPK6|MAPRE3|RETREG3|ZC4H2|ZSWIM6	http://amigo.geneontology.org/amigo/term/GO:0048699
regulation of gene expression	biological_process	GO:0010468	173	333	0.611377962	0.00367	0.154753684	04fa9dce-dc3a-4b00-90c6-89990774e24d|252d3981-8a9d-4cb3-8159-0d5cd1c32c16|4b498d98-ca4b-4123-9d28-34337916beda|657aad42-7332-4252-b03c-d90c32d100da|69b3ab3d-4505-4968-a1c2-552d71aee42e|8647195e-ba82-4e3b-8eaa-9c82e3edc575|a56e8f2e-fc94-45ea-b49c-dd6fc80d8b68|AES|AKAP17A|ANKRD49|ARID2|ARID4B|ARID5B|ATF1|ATF3|BARX2|BATF3|BSX|CBFA2T2|CBFA2T3|CBX3|CHD6|CIR1|CITED2|CREB5|CREM|CSDE1|CTDP1|CUX1|CXXC5|DG…	http://amigo.geneontology.org/amigo/term/GO:0010468
cytoskeleton organization	biological_process	GO:0007010	57	97	0.69153001	0.00355	0.154753684	0c363208-761b-44f3-99d0-e2f2596d6366|ABLIM1|ACTR3B|ARPC5|ARPC5L|CAPZA2|CEP350|CEP57|CROCC|DAAM1|DAAM2|DAG1|DIAPH3|DMTN|DNAL1|EPB41L1|EPB41L2|ESPN|FGFR1OP|FHOD3|GMFB|KANK3|KATNBL1|KIZ|LDB3|LMOD3|LOC101792346|LOC101793940|LOC101804876|LOC106015869|LOC113841592|MAP1A|MAP6D1|MAP7|MAP7D1|MAP7D2|MAP7D3|MAPRE1|NIN|PHACTR1|PLEKHH2|SASS6|SDCCAG8|SORBS1|STMN4|SVIL|SYNE1|TESK2|TMSB15B|TUBGCP3|TUBGCP6|VILL|W…	http://amigo.geneontology.org/amigo/term/GO:0007010
regulation of molecular function	biological_process	GO:0065009	29	44	0.77562756	0.00368	0.154753684	9eff9355-f868-482c-b22a-7b40218a037d|ac1c2d4e-dafd-4642-a48a-efa9374b5ecf|ATP5IF1|bef8fa78-c9af-4cd7-b583-113b96fdb6c8|BUB1B|CAAP1|CCNY|CCNYL1|CCPG1|CNPPD1|DOK7|ELFN2|FKBP15|FZR1|KLHL24|MALT1|NETO2|PABPN1L|PCIF1|PPP1R26|PPP1R36|PPP6R3|PRKAB2|SBF2|SFI1|SNX13|STIM1|ZCCHC9|ZFYVE28	http://amigo.geneontology.org/amigo/term/GO:0065009
centromere complex assembly	biological_process	GO:0034508	7	7	1.176814228	0.00359	0.154753684	CENPC|CENPH|CENPI|CENPK|CENPO|CENPP|CENPT	http://amigo.geneontology.org/amigo/term/GO:0034508
transcription, DNA-templated	biological_process	GO:0006351	202	394	0.603341305	0.00385	0.157751282	04fa9dce-dc3a-4b00-90c6-89990774e24d|252d3981-8a9d-4cb3-8159-0d5cd1c32c16|4b498d98-ca4b-4123-9d28-34337916beda|657aad42-7332-4252-b03c-d90c32d100da|8647195e-ba82-4e3b-8eaa-9c82e3edc575|a56e8f2e-fc94-45ea-b49c-dd6fc80d8b68|AES|ANKRD49|ARID2|ARID4B|ARID5B|ATF1|ATF3|BARX2|BATF3|BSX|CAVIN1|CBFA2T2|CBFA2T3|CBX3|CCNT1|CHD6|CIR1|CITED2|CRCP|CREB5|CREM|CSDE1|CTDP1|CUX1|CXXC5|DLX3|DLX4|e4b3cdd1-b969-4726-…	http://amigo.geneontology.org/amigo/term/GO:0006351
nucleic acid-templated transcription	biological_process	GO:0097659	202	394	0.603341305	0.00385	0.157751282	04fa9dce-dc3a-4b00-90c6-89990774e24d|252d3981-8a9d-4cb3-8159-0d5cd1c32c16|4b498d98-ca4b-4123-9d28-34337916beda|657aad42-7332-4252-b03c-d90c32d100da|8647195e-ba82-4e3b-8eaa-9c82e3edc575|a56e8f2e-fc94-45ea-b49c-dd6fc80d8b68|AES|ANKRD49|ARID2|ARID4B|ARID5B|ATF1|ATF3|BARX2|BATF3|BSX|CAVIN1|CBFA2T2|CBFA2T3|CBX3|CCNT1|CHD6|CIR1|CITED2|CRCP|CREB5|CREM|CSDE1|CTDP1|CUX1|CXXC5|DLX3|DLX4|e4b3cdd1-b969-4726-…	http://amigo.geneontology.org/amigo/term/GO:0097659
DNA-templated transcription, initiation	biological_process	GO:0006352	11	13	0.995765885	0.0039	0.157777215	CRCP|GTF2A2|LOC101790622|LOC101804819|POLR1E|TAF11|TAF4|TAF5|TAF7L|TBP|TBPL1	http://amigo.geneontology.org/amigo/term/GO:0006352
regulation of RNA metabolic process	biological_process	GO:0051252	159	305	0.613486762	0.00444	0.165974091	04fa9dce-dc3a-4b00-90c6-89990774e24d|252d3981-8a9d-4cb3-8159-0d5cd1c32c16|4b498d98-ca4b-4123-9d28-34337916beda|657aad42-7332-4252-b03c-d90c32d100da|69b3ab3d-4505-4968-a1c2-552d71aee42e|8647195e-ba82-4e3b-8eaa-9c82e3edc575|a56e8f2e-fc94-45ea-b49c-dd6fc80d8b68|AES|AKAP17A|ANKRD49|ARID2|ARID4B|ARID5B|ATF1|ATF3|BARX2|BATF3|BSX|CBFA2T2|CBFA2T3|CBX3|CHD6|CIR1|CITED2|CREB5|CREM|CSDE1|CTDP1|CUX1|CXXC5|DL…	http://amigo.geneontology.org/amigo/term/GO:0051252
tRNA aminoacylation for protein translation	biological_process	GO:0006418	21	30	0.82376996	0.00454	0.165974091	AARS|CARS|CARS2|d7458832-8bff-4fb5-8833-68a719ffab95|DARS|DARS2|FARS2|KARS|LOC101791669|LOC101795091|MARS2|NARS|NARS2|PARS2|QARS|RARS|RARS2|TARS|WARS|YARS|YARS2	http://amigo.geneontology.org/amigo/term/GO:0006418
amino acid activation	biological_process	GO:0043038	21	30	0.82376996	0.00454	0.165974091	AARS|CARS|CARS2|d7458832-8bff-4fb5-8833-68a719ffab95|DARS|DARS2|FARS2|KARS|LOC101791669|LOC101795091|MARS2|NARS|NARS2|PARS2|QARS|RARS|RARS2|TARS|WARS|YARS|YARS2	http://amigo.geneontology.org/amigo/term/GO:0043038
tRNA aminoacylation	biological_process	GO:0043039	21	30	0.82376996	0.00454	0.165974091	AARS|CARS|CARS2|d7458832-8bff-4fb5-8833-68a719ffab95|DARS|DARS2|FARS2|KARS|LOC101791669|LOC101795091|MARS2|NARS|NARS2|PARS2|QARS|RARS|RARS2|TARS|WARS|YARS|YARS2	http://amigo.geneontology.org/amigo/term/GO:0043039
regulation of phosphate metabolic process	biological_process	GO:0019220	17	23	0.869819212	0.00439	0.165974091	bef8fa78-c9af-4cd7-b583-113b96fdb6c8|CCNY|CCNYL1|CNPPD1|DOK7|ELFN2|FKBP15|PCIF1|PPP1R14C|PPP1R14D|PPP1R26|PPP1R36|PPP6R3|RELL1|SFI1|ZCCHC9|ZFYVE28	http://amigo.geneontology.org/amigo/term/GO:0019220
regulation of phosphorus metabolic process	biological_process	GO:0051174	17	23	0.869819212	0.00439	0.165974091	bef8fa78-c9af-4cd7-b583-113b96fdb6c8|CCNY|CCNYL1|CNPPD1|DOK7|ELFN2|FKBP15|PCIF1|PPP1R14C|PPP1R14D|PPP1R26|PPP1R36|PPP6R3|RELL1|SFI1|ZCCHC9|ZFYVE28	http://amigo.geneontology.org/amigo/term/GO:0051174
neuron development	biological_process	GO:0048666	14	18	0.915299955	0.00457	0.165974091	2058d621-ab91-45be-b7be-de67b56ec3f8|57f7a64a-d428-427a-9011-899e91a22b36|CAMSAP1|CAMSAP2|CAPRIN1|ccc14945-586a-4a6a-a706-59609f80b83e|CNTN1|DPYSL5|GRIP1|LRRC4C|MAPK6|MAPRE3|RETREG3|ZSWIM6	http://amigo.geneontology.org/amigo/term/GO:0048666
protein O-linked glycosylation	biological_process	GO:0006493	9	10	1.059132805	0.00428	0.165974091	EOGT|GALNT10|GXYLT1|GXYLT2|OGT|POMGNT2|POMK|POMT2|RXYLT1	http://amigo.geneontology.org/amigo/term/GO:0006493
negative regulation of hydrolase activity	biological_process	GO:0051346	9	10	1.059132805	0.00428	0.165974091	ATP5IF1|CAAP1|ELFN2|FKBP15|PCIF1|PPP1R26|PPP1R36|SFI1|ZCCHC9	http://amigo.geneontology.org/amigo/term/GO:0051346
nucleobase-containing compound biosynthetic process	biological_process	GO:0034654	221	436	0.59650446	0.00512	0.176295484	04fa9dce-dc3a-4b00-90c6-89990774e24d|252d3981-8a9d-4cb3-8159-0d5cd1c32c16|4b498d98-ca4b-4123-9d28-34337916beda|657aad42-7332-4252-b03c-d90c32d100da|8647195e-ba82-4e3b-8eaa-9c82e3edc575|a56e8f2e-fc94-45ea-b49c-dd6fc80d8b68|ADA|ADSS|ADSSL1|ae64c188-4378-4662-abf3-22d4eaa4b615|AES|AMPD1|AMPD2|ANKRD49|ARID2|ARID4B|ARID5B|ATF1|ATF3|ATP5ME|ATP5PB|ATP5PO|ATP6|BARX2|BATF3|BSX|CAVIN1|CBFA2T2|CBFA2T3|CBX3|…	http://amigo.geneontology.org/amigo/term/GO:0034654
regulation of nucleobase-containing compound metabolic process	biological_process	GO:0019219	163	314	0.61089401	0.00496	0.176295484	04fa9dce-dc3a-4b00-90c6-89990774e24d|252d3981-8a9d-4cb3-8159-0d5cd1c32c16|4b498d98-ca4b-4123-9d28-34337916beda|657aad42-7332-4252-b03c-d90c32d100da|69b3ab3d-4505-4968-a1c2-552d71aee42e|8647195e-ba82-4e3b-8eaa-9c82e3edc575|a56e8f2e-fc94-45ea-b49c-dd6fc80d8b68|AES|AKAP17A|ANKRD49|ARID2|ARID4B|ARID5B|ATF1|ATF3|BARX2|BATF3|BSX|CBFA2T2|CBFA2T3|CBX3|CHD6|CIR1|CITED2|CREB5|CREM|CSDE1|CTDP1|CUX1|CXXC5|DE…	http://amigo.geneontology.org/amigo/term/GO:0019219
macromolecule modification	biological_process	GO:0043412	148	283	0.615436416	0.00513	0.176295484	68950849-e697-469c-ab95-2a8d5a3d66fe|ABHD13|ADAT2|ADPRH|AGBL3|ALG2|ALG3|ALG6|ANKRD16|b2c2ada4-d545-47e5-aaaa-8f8baaa3ccd5|B3GALNT2|B3GALT6|B3GAT1|B3GNT4|B3GNT7|B3GNT9|bef8fa78-c9af-4cd7-b583-113b96fdb6c8|BRD1|BRPF3|BUB1B|BUD23|CCNY|CCNYL1|CDK19|CDK5RAP1|CNPPD1|CSNK1G2|CSNK1G3|CTDP1|DCUN1D1|DOK7|DOLPP1|DR1|DYRK1A|EDEM3|EED|ELFN2|EOGT|ERC1|EZH1|feadf5ad-a8ac-40ed-876a-8181bc877b90|FKBP15|FNTA|FTSJ3…	http://amigo.geneontology.org/amigo/term/GO:0043412
cellular protein modification process	biological_process	GO:0006464	135	256	0.620585628	0.00507	0.176295484	68950849-e697-469c-ab95-2a8d5a3d66fe|ABHD13|ADPRH|AGBL3|ALG2|ALG3|ALG6|b2c2ada4-d545-47e5-aaaa-8f8baaa3ccd5|B3GALNT2|B3GALT6|B3GAT1|B3GNT4|B3GNT7|B3GNT9|bef8fa78-c9af-4cd7-b583-113b96fdb6c8|BRD1|BRPF3|BUB1B|CCNY|CCNYL1|CDK19|CNPPD1|CSNK1G2|CSNK1G3|CTDP1|DCUN1D1|DOK7|DOLPP1|DR1|DYRK1A|EDEM3|EED|ELFN2|EOGT|ERC1|EZH1|feadf5ad-a8ac-40ed-876a-8181bc877b90|FKBP15|FNTA|FUT11|FUT4|FZR1|GALNT10|GALNT11|GA…	http://amigo.geneontology.org/amigo/term/GO:0006464
protein modification process	biological_process	GO:0036211	135	256	0.620585628	0.00507	0.176295484	68950849-e697-469c-ab95-2a8d5a3d66fe|ABHD13|ADPRH|AGBL3|ALG2|ALG3|ALG6|b2c2ada4-d545-47e5-aaaa-8f8baaa3ccd5|B3GALNT2|B3GALT6|B3GAT1|B3GNT4|B3GNT7|B3GNT9|bef8fa78-c9af-4cd7-b583-113b96fdb6c8|BRD1|BRPF3|BUB1B|CCNY|CCNYL1|CDK19|CNPPD1|CSNK1G2|CSNK1G3|CTDP1|DCUN1D1|DOK7|DOLPP1|DR1|DYRK1A|EDEM3|EED|ELFN2|EOGT|ERC1|EZH1|feadf5ad-a8ac-40ed-876a-8181bc877b90|FKBP15|FNTA|FUT11|FUT4|FZR1|GALNT10|GALNT11|GA…	http://amigo.geneontology.org/amigo/term/GO:0036211
regulation of transcription, DNA-templated	biological_process	GO:0006355	154	296	0.612261457	0.00561	0.18676625	04fa9dce-dc3a-4b00-90c6-89990774e24d|252d3981-8a9d-4cb3-8159-0d5cd1c32c16|4b498d98-ca4b-4123-9d28-34337916beda|657aad42-7332-4252-b03c-d90c32d100da|8647195e-ba82-4e3b-8eaa-9c82e3edc575|a56e8f2e-fc94-45ea-b49c-dd6fc80d8b68|AES|ANKRD49|ARID2|ARID4B|ARID5B|ATF1|ATF3|BARX2|BATF3|BSX|CBFA2T2|CBFA2T3|CBX3|CHD6|CIR1|CITED2|CREB5|CREM|CSDE1|CTDP1|CUX1|CXXC5|DLX3|DLX4|e4b3cdd1-b969-4726-ad39-6142bc1448a0|…	http://amigo.geneontology.org/amigo/term/GO:0006355
regulation of nucleic acid-templated transcription	biological_process	GO:1903506	154	296	0.612261457	0.00561	0.18676625	04fa9dce-dc3a-4b00-90c6-89990774e24d|252d3981-8a9d-4cb3-8159-0d5cd1c32c16|4b498d98-ca4b-4123-9d28-34337916beda|657aad42-7332-4252-b03c-d90c32d100da|8647195e-ba82-4e3b-8eaa-9c82e3edc575|a56e8f2e-fc94-45ea-b49c-dd6fc80d8b68|AES|ANKRD49|ARID2|ARID4B|ARID5B|ATF1|ATF3|BARX2|BATF3|BSX|CBFA2T2|CBFA2T3|CBX3|CHD6|CIR1|CITED2|CREB5|CREM|CSDE1|CTDP1|CUX1|CXXC5|DLX3|DLX4|e4b3cdd1-b969-4726-ad39-6142bc1448a0|…	http://amigo.geneontology.org/amigo/term/GO:1903506
regulation of RNA biosynthetic process	biological_process	GO:2001141	154	296	0.612261457	0.00561	0.18676625	04fa9dce-dc3a-4b00-90c6-89990774e24d|252d3981-8a9d-4cb3-8159-0d5cd1c32c16|4b498d98-ca4b-4123-9d28-34337916beda|657aad42-7332-4252-b03c-d90c32d100da|8647195e-ba82-4e3b-8eaa-9c82e3edc575|a56e8f2e-fc94-45ea-b49c-dd6fc80d8b68|AES|ANKRD49|ARID2|ARID4B|ARID5B|ATF1|ATF3|BARX2|BATF3|BSX|CBFA2T2|CBFA2T3|CBX3|CHD6|CIR1|CITED2|CREB5|CREM|CSDE1|CTDP1|CUX1|CXXC5|DLX3|DLX4|e4b3cdd1-b969-4726-ad39-6142bc1448a0|…	http://amigo.geneontology.org/amigo/term/GO:2001141
cellular homeostasis	biological_process	GO:0019725	29	45	0.758391392	0.00598	0.189228515	ABCB7|C2CD2L|CLCN3|DLD|DNAJC16|ff7964de-4a8c-4e66-9838-a5e51e38483a|GLRX5|LRRC8C|NHLRC2|NXN|PDIA4|PDIA6|PRDX4|PRDX6|PTGES2|QSOX2|RMDN3|SEC22A|SH3BGRL3|STIM2|TMCO1|TMX1|TMX3|TMX4|TXNDC11|TXNDC12|TXNDC15|TXNDC16|TXNDC9	http://amigo.geneontology.org/amigo/term/GO:0019725
neuron differentiation	biological_process	GO:0030182	15	20	0.882610671	0.00598	0.189228515	2058d621-ab91-45be-b7be-de67b56ec3f8|57f7a64a-d428-427a-9011-899e91a22b36|CAMSAP1|CAMSAP2|CAPRIN1|ccc14945-586a-4a6a-a706-59609f80b83e|CNTN1|DPYSL5|GRIP1|LRRC4C|MAPK6|MAPRE3|RETREG3|ZC4H2|ZSWIM6	http://amigo.geneontology.org/amigo/term/GO:0030182
regulation of actin cytoskeleton organization	biological_process	GO:0032956	12	15	0.941451383	0.00595	0.189228515	ACTR3B|ARPC5|ARPC5L|CAPZA2|GMFB|KANK3|LMOD3|LOC101792346|LOC101804876|LOC106015869|PLEKHH2|WASHC1	http://amigo.geneontology.org/amigo/term/GO:0032956
regulation of actin filament-based process	biological_process	GO:0032970	12	15	0.941451383	0.00595	0.189228515	ACTR3B|ARPC5|ARPC5L|CAPZA2|GMFB|KANK3|LMOD3|LOC101792346|LOC101804876|LOC106015869|PLEKHH2|WASHC1	http://amigo.geneontology.org/amigo/term/GO:0032970
response to transforming growth factor beta	biological_process	GO:0071559	12	15	0.941451383	0.00595	0.189228515	9980019a-aacb-4d2e-99f9-7e167ae3e151|LOC110352107|MTMR4|SKOR2|SMAD1|SMAD2|SMAD3|SMAD4|SMAD5|SMAD7|SMAD9|ZFYVE9	http://amigo.geneontology.org/amigo/term/GO:0071559
regulation of nitrogen compound metabolic process	biological_process	GO:0051171	167	324	0.606567828	0.00645	0.200137864	04fa9dce-dc3a-4b00-90c6-89990774e24d|252d3981-8a9d-4cb3-8159-0d5cd1c32c16|4b498d98-ca4b-4123-9d28-34337916beda|657aad42-7332-4252-b03c-d90c32d100da|69b3ab3d-4505-4968-a1c2-552d71aee42e|8647195e-ba82-4e3b-8eaa-9c82e3edc575|a56e8f2e-fc94-45ea-b49c-dd6fc80d8b68|AES|AKAP17A|ANKRD49|ARID2|ARID4B|ARID5B|ATF1|ATF3|BARX2|BATF3|BSX|CBFA2T2|CBFA2T3|CBX3|CHD6|CIR1|CITED2|CREB5|CREM|CSDE1|CTDP1|CUX1|CXXC5|DE…	http://amigo.geneontology.org/amigo/term/GO:0051171
homeostatic process	biological_process	GO:0042592	39	64	0.71712117	0.00644	0.200137864	ABCB7|C2CD2L|CLCN3|COMMD1|CUTC|DLD|DNAJC16|ff7964de-4a8c-4e66-9838-a5e51e38483a|GLRX5|LOC101789642|LOC101793346|LOC101801757|LRRC8C|NHLRC2|NXN|PDIA4|PDIA6|PRDX4|PRDX6|PTGES2|QSOX2|RMDN3|SEC22A|SH3BGRL3|SLC9A5|SLC9A7|SLC9A8|SLC9A9|STIM2|TMCO1|TMEM97|TMX1|TMX3|TMX4|TXNDC11|TXNDC12|TXNDC15|TXNDC16|TXNDC9	http://amigo.geneontology.org/amigo/term/GO:0042592
phosphorylation	biological_process	GO:0016310	31	49	0.744515124	0.00677	0.208047308	bef8fa78-c9af-4cd7-b583-113b96fdb6c8|BPGM|BPNT1|CCNY|CCNYL1|CDK19|CNPPD1|CSNK1G2|CSNK1G3|CYTB|DOK7|DYRK1A|ERC1|GNPTG|IMPAD1|LOC101793235|LOC101800441|LOC101803858|LRRC1|MAP3K9|MAPK14|ND2|ND4|ND5|NDUFS1|NDUFS6|PPP1R14C|PPP1R14D|RELL1|SPAG5|ZFYVE28	http://amigo.geneontology.org/amigo/term/GO:0016310
cellular nitrogen compound biosynthetic process	biological_process	GO:0044271	303	613	0.581687946	0.00692	0.210631619	04fa9dce-dc3a-4b00-90c6-89990774e24d|252d3981-8a9d-4cb3-8159-0d5cd1c32c16|4b498d98-ca4b-4123-9d28-34337916beda|657aad42-7332-4252-b03c-d90c32d100da|8647195e-ba82-4e3b-8eaa-9c82e3edc575|a56e8f2e-fc94-45ea-b49c-dd6fc80d8b68|AARS|ADA|ADSS|ADSSL1|ae64c188-4378-4662-abf3-22d4eaa4b615|AES|AMPD1|AMPD2|ANKRD49|ARID2|ARID4B|ARID5B|ASNSD1|ATF1|ATF3|ATP5ME|ATP5PB|ATP5PO|ATP6|BARX2|BATF3|BSX|CARS|CARS2|CAVIN…	http://amigo.geneontology.org/amigo/term/GO:0044271
regulation of macromolecule biosynthetic process	biological_process	GO:0010556	161	312	0.607266316	0.00703	0.211961132	04fa9dce-dc3a-4b00-90c6-89990774e24d|252d3981-8a9d-4cb3-8159-0d5cd1c32c16|4b498d98-ca4b-4123-9d28-34337916beda|657aad42-7332-4252-b03c-d90c32d100da|8647195e-ba82-4e3b-8eaa-9c82e3edc575|a56e8f2e-fc94-45ea-b49c-dd6fc80d8b68|AES|ANKRD49|ARID2|ARID4B|ARID5B|ATF1|ATF3|BARX2|BATF3|BSX|CBFA2T2|CBFA2T3|CBX3|CHD6|CIR1|CITED2|CREB5|CREM|CSDE1|CTDP1|CUX1|CXXC5|DHX29|DLX3|DLX4|e4b3cdd1-b969-4726-ad39-6142bc1…	http://amigo.geneontology.org/amigo/term/GO:0010556
regulation of cellular macromolecule biosynthetic process	biological_process	GO:2000112	160	310	0.607387989	0.00713	0.212967103	04fa9dce-dc3a-4b00-90c6-89990774e24d|252d3981-8a9d-4cb3-8159-0d5cd1c32c16|4b498d98-ca4b-4123-9d28-34337916beda|657aad42-7332-4252-b03c-d90c32d100da|8647195e-ba82-4e3b-8eaa-9c82e3edc575|a56e8f2e-fc94-45ea-b49c-dd6fc80d8b68|AES|ANKRD49|ARID2|ARID4B|ARID5B|ATF1|ATF3|BARX2|BATF3|BSX|CBFA2T2|CBFA2T3|CBX3|CHD6|CIR1|CITED2|CREB5|CREM|CSDE1|CTDP1|CUX1|CXXC5|DHX29|DLX3|DLX4|e4b3cdd1-b969-4726-ad39-6142bc1…	http://amigo.geneontology.org/amigo/term/GO:2000112
cellular metabolic process	biological_process	GO:0044237	769	1631	0.554856003	0.0072	0.213066667	04fa9dce-dc3a-4b00-90c6-89990774e24d|252d3981-8a9d-4cb3-8159-0d5cd1c32c16|4568fa11-bb65-42fe-910f-67d9665cb647|4b498d98-ca4b-4123-9d28-34337916beda|5c22f54b-f58b-453a-8b1d-0608a4c8017b|657aad42-7332-4252-b03c-d90c32d100da|68950849-e697-469c-ab95-2a8d5a3d66fe|69b3ab3d-4505-4968-a1c2-552d71aee42e|79da57f9-7126-4f66-97fc-a1906cff5fcb|8647195e-ba82-4e3b-8eaa-9c82e3edc575|9253c9db-3192-42dd-af3e-0e393…	http://amigo.geneontology.org/amigo/term/GO:0044237
regulation of cellular biosynthetic process	biological_process	GO:0031326	163	317	0.605112679	0.00797	0.233221622	04fa9dce-dc3a-4b00-90c6-89990774e24d|252d3981-8a9d-4cb3-8159-0d5cd1c32c16|4b498d98-ca4b-4123-9d28-34337916beda|657aad42-7332-4252-b03c-d90c32d100da|8647195e-ba82-4e3b-8eaa-9c82e3edc575|a56e8f2e-fc94-45ea-b49c-dd6fc80d8b68|AES|ANKRD49|ARID2|ARID4B|ARID5B|ATF1|ATF3|BARX2|BATF3|BSX|CBFA2T2|CBFA2T3|CBX3|CHD6|CIR1|CITED2|CREB5|CREM|CSDE1|CTDP1|CUX1|CXXC5|DHX29|DLX3|DLX4|e4b3cdd1-b969-4726-ad39-6142bc1…	http://amigo.geneontology.org/amigo/term/GO:0031326
regulation of cellular component size	biological_process	GO:0032535	13	17	0.899916763	0.0081	0.233221622	ACTR3B|ARPC5|ARPC5L|CAPZA2|CLCN3|ff7964de-4a8c-4e66-9838-a5e51e38483a|GMFB|KANK3|LMOD3|LOC101792346|LRRC8C|PLEKHH2|WASHC1	http://amigo.geneontology.org/amigo/term/GO:0032535
mitochondrial translation	biological_process	GO:0032543	6	6	1.176814228	0.00803	0.233221622	CHCHD1|DARS2|GFM1|MRPL16|MRPL2|PTCD3	http://amigo.geneontology.org/amigo/term/GO:0032543
negative regulation of phosphorus metabolic process	biological_process	GO:0010563	8	9	1.046057092	0.0087	0.2397	ELFN2|FKBP15|PCIF1|PPP1R26|PPP1R36|SFI1|ZCCHC9|ZFYVE28	http://amigo.geneontology.org/amigo/term/GO:0010563
endosomal transport	biological_process	GO:0016197	8	9	1.046057092	0.0087	0.2397	ANKRD50|DENND2A|MICALL1|MICALL2|SNF8|SNX8|VPS36|VPS53	http://amigo.geneontology.org/amigo/term/GO:0016197
negative regulation of phosphate metabolic process	biological_process	GO:0045936	8	9	1.046057092	0.0087	0.2397	ELFN2|FKBP15|PCIF1|PPP1R26|PPP1R36|SFI1|ZCCHC9|ZFYVE28	http://amigo.geneontology.org/amigo/term/GO:0045936
regulation of neurogenesis	biological_process	GO:0050767	8	9	1.046057092	0.0087	0.2397	57f7a64a-d428-427a-9011-899e91a22b36|CAPRIN1|IGSF10|LRRC4C|MAPK6|RETREG3|ZC4H2|ZSWIM6	http://amigo.geneontology.org/amigo/term/GO:0050767
regulation of cell development	biological_process	GO:0060284	8	9	1.046057092	0.0087	0.2397	57f7a64a-d428-427a-9011-899e91a22b36|CAPRIN1|IGSF10|LRRC4C|MAPK6|RETREG3|ZC4H2|ZSWIM6	http://amigo.geneontology.org/amigo/term/GO:0060284
positive regulation of gene expression	biological_process	GO:0010628	17	24	0.833576745	0.00881	0.240656068	a56e8f2e-fc94-45ea-b49c-dd6fc80d8b68|ANKRD49|CHD6|CREB5|DHX29|ELF2|ETV4|GABPB2|GATA6|HMBOX1|KDM7A|MALT1|MLLT10|MRTFA|PHF2|SUPT4H1|TEF	http://amigo.geneontology.org/amigo/term/GO:0010628
aromatic compound biosynthetic process	biological_process	GO:0019438	227	453	0.589706026	0.00904	0.244846102	04fa9dce-dc3a-4b00-90c6-89990774e24d|252d3981-8a9d-4cb3-8159-0d5cd1c32c16|4b498d98-ca4b-4123-9d28-34337916beda|657aad42-7332-4252-b03c-d90c32d100da|8647195e-ba82-4e3b-8eaa-9c82e3edc575|a56e8f2e-fc94-45ea-b49c-dd6fc80d8b68|ADA|ADSS|ADSSL1|ae64c188-4378-4662-abf3-22d4eaa4b615|AES|AMPD1|AMPD2|ANKRD49|ARID2|ARID4B|ARID5B|ATF1|ATF3|ATP5ME|ATP5PB|ATP5PO|ATP6|BARX2|BATF3|BSX|CAVIN1|CBFA2T2|CBFA2T3|CBX3|…	http://amigo.geneontology.org/amigo/term/GO:0019438
regulation of transcription from RNA polymerase II promoter	biological_process	GO:0006357	42	71	0.696143628	0.00989	0.26039541	a56e8f2e-fc94-45ea-b49c-dd6fc80d8b68|ATF1|ATF3|BATF3|CHD6|CREM|CTDP1|CXXC5|EPC1|EPC2|ETV4|FOSL2|GABPB2|GLIS3|HEXIM1|HSF2|JUND|LDB2|LOC101793178|MED1|MED10|MED12L|MED13L|MED20|MED22|MED6|MED9|MITF|MLLT10|MLXIP|MRTFA|MXI1|NELFA|PHF12|PLAGL1|RFX5|SP4|TCERG1|TEF|UBP1|ZBTB2|ZNF704	http://amigo.geneontology.org/amigo/term/GO:0006357
actin filament-based process	biological_process	GO:0030029	30	48	0.735508893	0.00983	0.26039541	ACTR3B|ARPC5|ARPC5L|CAPZA2|DAAM1|DAAM2|DIAPH3|EPB41L1|EPB41L2|ESPN|FHOD3|GMFB|KANK3|LDB3|LMOD3|LOC101792346|LOC101793940|LOC101804876|LOC106015869|LOC113841592|PHACTR1|PLEKHH2|SORBS1|TESK2|TMSB15B|WASF1|WASF2|WASF3|WASHC1|WIPF1	http://amigo.geneontology.org/amigo/term/GO:0030029
actin cytoskeleton organization	biological_process	GO:0030036	30	48	0.735508893	0.00983	0.26039541	ACTR3B|ARPC5|ARPC5L|CAPZA2|DAAM1|DAAM2|DIAPH3|EPB41L1|EPB41L2|ESPN|FHOD3|GMFB|KANK3|LDB3|LMOD3|LOC101792346|LOC101793940|LOC101804876|LOC106015869|LOC113841592|PHACTR1|PLEKHH2|SORBS1|TESK2|TMSB15B|WASF1|WASF2|WASF3|WASHC1|WIPF1	http://amigo.geneontology.org/amigo/term/GO:0030036
regulation of catalytic activity	biological_process	GO:0050790	23	35	0.773335064	0.00994	0.26039541	9eff9355-f868-482c-b22a-7b40218a037d|ATP5IF1|bef8fa78-c9af-4cd7-b583-113b96fdb6c8|BUB1B|CAAP1|CCNY|CCNYL1|CNPPD1|DOK7|ELFN2|FKBP15|FZR1|PABPN1L|PCIF1|PPP1R26|PPP1R36|PPP6R3|PRKAB2|SBF2|SFI1|SNX13|ZCCHC9|ZFYVE28	http://amigo.geneontology.org/amigo/term/GO:0050790
regulation of biosynthetic process	biological_process	GO:0009889	163	319	0.601318869	0.01076	0.272540787	04fa9dce-dc3a-4b00-90c6-89990774e24d|252d3981-8a9d-4cb3-8159-0d5cd1c32c16|4b498d98-ca4b-4123-9d28-34337916beda|657aad42-7332-4252-b03c-d90c32d100da|8647195e-ba82-4e3b-8eaa-9c82e3edc575|a56e8f2e-fc94-45ea-b49c-dd6fc80d8b68|AES|ANKRD49|ARID2|ARID4B|ARID5B|ATF1|ATF3|BARX2|BATF3|BSX|CBFA2T2|CBFA2T3|CBX3|CHD6|CIR1|CITED2|CREB5|CREM|CSDE1|CTDP1|CUX1|CXXC5|DHX29|DLX3|DLX4|e4b3cdd1-b969-4726-ad39-6142bc1…	http://amigo.geneontology.org/amigo/term/GO:0009889
transmembrane receptor protein tyrosine kinase signaling pathway	biological_process	GO:0007169	24	37	0.763338959	0.01074	0.272540787	a00f0252-04ca-4c37-b932-f1fdc0be18f9|ANKS1A|bef8fa78-c9af-4cd7-b583-113b96fdb6c8|EFNA5|EGFR|FGF10|FGF12|FGF3|FGF7|FGF9|FLT1|FLT4|FRS3|IRS1|IRS2|IRS4|KDR|LOC101791127|LOC101797327|MET|PDGFD|ROR1|TEK|ZFYVE28	http://amigo.geneontology.org/amigo/term/GO:0007169
transforming growth factor beta receptor signaling pathway	biological_process	GO:0007179	11	14	0.924639751	0.01083	0.272540787	LOC110352107|MTMR4|SKOR2|SMAD1|SMAD2|SMAD3|SMAD4|SMAD5|SMAD7|SMAD9|ZFYVE9	http://amigo.geneontology.org/amigo/term/GO:0007179
negative regulation of catalytic activity	biological_process	GO:0043086	11	14	0.924639751	0.01083	0.272540787	ATP5IF1|BUB1B|CAAP1|ELFN2|FKBP15|PCIF1|PPP1R26|PPP1R36|SFI1|ZCCHC9|ZFYVE28	http://amigo.geneontology.org/amigo/term/GO:0043086
cellular response to transforming growth factor beta stimulus	biological_process	GO:0071560	11	14	0.924639751	0.01083	0.272540787	LOC110352107|MTMR4|SKOR2|SMAD1|SMAD2|SMAD3|SMAD4|SMAD5|SMAD7|SMAD9|ZFYVE9	http://amigo.geneontology.org/amigo/term/GO:0071560
regulation of Ras protein signal transduction	biological_process	GO:0046578	26	41	0.746272437	0.01222	0.298293333	ABRA|ad5ce991-c450-4184-8a1d-30a276cc21d9|ARHGEF10L|ARHGEF16|ARHGEF39|ARHGEF9|CDC42SE2|CYTH3|CYTH4|FARP1|FARP2|FGD3|GBF1|IQSEC3|KALRN|LOC101801720|NGEF|OBSCN|PLEKHG1|PLEKHG4|PRDM16|PSD2|PSD3|RASA3|SHOC2|SPATA13	http://amigo.geneontology.org/amigo/term/GO:0046578
protein phosphorylation	biological_process	GO:0006468	15	21	0.840581592	0.01232	0.298293333	bef8fa78-c9af-4cd7-b583-113b96fdb6c8|CCNY|CCNYL1|CDK19|CNPPD1|CSNK1G2|CSNK1G3|DOK7|DYRK1A|ERC1|LRRC1|MAP3K9|MAPK14|RELL1|ZFYVE28	http://amigo.geneontology.org/amigo/term/GO:0006468
autophagy	biological_process	GO:0006914	15	21	0.840581592	0.01232	0.298293333	ACBD5|ATG101|ATG2B|DHRSX|GABARAPL1|MAP1LC3A|MAP1LC3B|MAP1LC3C|MTCL1|NRBF2|RETREG1|SOGA1|SOGA3|TECPR1|WIPI2	http://amigo.geneontology.org/amigo/term/GO:0006914
negative regulation of protein metabolic process	biological_process	GO:0051248	15	21	0.840581592	0.01232	0.298293333	BUB1B|CAAP1|ELFN2|ERLEC1|FKBP15|HHATL|PCIF1|PPP1R26|PPP1R36|PRMT3|SFI1|TNRC6B|TNRC6C|ZCCHC9|ZFYVE28	http://amigo.geneontology.org/amigo/term/GO:0051248
regulation of anatomical structure size	biological_process	GO:0090066	15	21	0.840581592	0.01232	0.298293333	ACTR3B|AGTR1|ARPC5|ARPC5L|CAPZA2|CLCN3|ff7964de-4a8c-4e66-9838-a5e51e38483a|GMFB|KANK3|LMOD3|LOC101792346|LRRC8C|NPPC|PLEKHH2|WASHC1	http://amigo.geneontology.org/amigo/term/GO:0090066
chromatin modification	biological_process	GO:0016568	20	30	0.784542819	0.01273	0.305902857	204da7fd-91a7-4c54-a6f6-66a386b5cf17|ACTL6A|ARID1A|ARID1B|BAZ1A|BRD1|BRPF3|CENPP|CSPG5|DR1|EED|EZH1|feadf5ad-a8ac-40ed-876a-8181bc877b90|INO80C|KMT5B|PBRM1|PHC1|PHF2|RCOR1|TRRAP	http://amigo.geneontology.org/amigo/term/GO:0016568
protein modification by small protein conjugation or removal	biological_process	GO:0070647	21	32	0.772284337	0.0139	0.33117971	BUB1B|DCUN1D1|FZR1|GPS1|JOSD1|KLHL15|KLHL7|KLHL8|MARCH8|MINDY2|OTUD7A|PHC1|PRMT3|SENP5|SUMO1|SUMO2|UBA2|UBE3C|UBOX5|USP53|USP54	http://amigo.geneontology.org/amigo/term/GO:0070647
positive regulation of transcription, DNA-templated	biological_process	GO:0045893	16	23	0.818653376	0.0143	0.33117971	a56e8f2e-fc94-45ea-b49c-dd6fc80d8b68|ANKRD49|CHD6|CREB5|ELF2|ETV4|GABPB2|GATA6|HMBOX1|KDM7A|MALT1|MLLT10|MRTFA|PHF2|SUPT4H1|TEF	http://amigo.geneontology.org/amigo/term/GO:0045893
positive regulation of RNA metabolic process	biological_process	GO:0051254	16	23	0.818653376	0.0143	0.33117971	a56e8f2e-fc94-45ea-b49c-dd6fc80d8b68|ANKRD49|CHD6|CREB5|ELF2|ETV4|GABPB2|GATA6|HMBOX1|KDM7A|MALT1|MLLT10|MRTFA|PHF2|SUPT4H1|TEF	http://amigo.geneontology.org/amigo/term/GO:0051254
positive regulation of RNA biosynthetic process	biological_process	GO:1902680	16	23	0.818653376	0.0143	0.33117971	a56e8f2e-fc94-45ea-b49c-dd6fc80d8b68|ANKRD49|CHD6|CREB5|ELF2|ETV4|GABPB2|GATA6|HMBOX1|KDM7A|MALT1|MLLT10|MRTFA|PHF2|SUPT4H1|TEF	http://amigo.geneontology.org/amigo/term/GO:1902680
positive regulation of nucleic acid-templated transcription	biological_process	GO:1903508	16	23	0.818653376	0.0143	0.33117971	a56e8f2e-fc94-45ea-b49c-dd6fc80d8b68|ANKRD49|CHD6|CREB5|ELF2|ETV4|GABPB2|GATA6|HMBOX1|KDM7A|MALT1|MLLT10|MRTFA|PHF2|SUPT4H1|TEF	http://amigo.geneontology.org/amigo/term/GO:1903508
positive regulation of cellular process	biological_process	GO:0048522	52	92	0.665155868	0.01469	0.337764317	1961e84c-aa73-4203-8ad1-36b9def555b5|a56e8f2e-fc94-45ea-b49c-dd6fc80d8b68|ABRA|ACTR3B|ANKRD49|ARPC5|ARPC5L|bef8fa78-c9af-4cd7-b583-113b96fdb6c8|C2CD2L|CAPRIN1|CDC25A|CHD6|CREB5|CSPP1|DCUN1D1|DDHD1|DHRSX|DHX29|DOK7|ELF2|ETV4|FAM53B|FGFR3|FZR1|GABPB2|GATA3|GATA6|GMFB|HMBOX1|KATNBL1|KDM7A|LOC106017999|LSM10|LURAP1L|LY86|MALT1|MAPK6|MIEF1|MLLT10|MRTFA|PHF2|RELL1|RETREG3|SHOC2|STIM1|SUPT4H1|TEF|TNFAIP…	http://amigo.geneontology.org/amigo/term/GO:0048522
multicellular organismal development	biological_process	GO:0007275	79	147	0.632437578	0.01639	0.374160286	1961e84c-aa73-4203-8ad1-36b9def555b5|2058d621-ab91-45be-b7be-de67b56ec3f8|4e1b498d-bcf5-4742-9885-576c809b4f19|538b4b50-9ce6-42ce-ada1-81732b50cf03|57f7a64a-d428-427a-9011-899e91a22b36|594e5d7a-7a44-4ff4-beb2-34389ee9977a|6117fb1b-7eab-4317-8294-249985587b5d|8148980a-db43-49bf-86fd-f9f909246a87|a1170176-b91a-47fa-be5e-e88081cfbe13|ADAM12|BBX|C1H12orf29|C1H2orf49|CAMSAP1|CAMSAP2|CAPRIN1|ccc14945-5…	http://amigo.geneontology.org/amigo/term/GO:0007275
heterocycle biosynthetic process	biological_process	GO:0018130	230	465	0.582080156	0.01773	0.379921854	04fa9dce-dc3a-4b00-90c6-89990774e24d|252d3981-8a9d-4cb3-8159-0d5cd1c32c16|4b498d98-ca4b-4123-9d28-34337916beda|657aad42-7332-4252-b03c-d90c32d100da|8647195e-ba82-4e3b-8eaa-9c82e3edc575|9253c9db-3192-42dd-af3e-0e3932e13f2f|a56e8f2e-fc94-45ea-b49c-dd6fc80d8b68|ADA|ADSS|ADSSL1|ae64c188-4378-4662-abf3-22d4eaa4b615|AES|AMPD1|AMPD2|ANKRD49|ARID2|ARID4B|ARID5B|ATF1|ATF3|ATP5ME|ATP5PB|ATP5PO|ATP6|BARX2|B…	http://amigo.geneontology.org/amigo/term/GO:0018130
positive regulation of metabolic process	biological_process	GO:0009893	25	40	0.735508893	0.01782	0.379921854	a56e8f2e-fc94-45ea-b49c-dd6fc80d8b68|ANKRD49|bef8fa78-c9af-4cd7-b583-113b96fdb6c8|CHD6|CREB5|DCUN1D1|DHRSX|DHX29|DOK7|ELF2|ETV4|FZR1|GABPB2|GATA6|HMBOX1|KDM7A|MALT1|MLLT10|MRTFA|PABPN1L|PHF2|RELL1|SNX13|SUPT4H1|TEF	http://amigo.geneontology.org/amigo/term/GO:0009893
negative regulation of phosphatase activity	biological_process	GO:0010923	7	8	1.02971245	0.01748	0.379921854	ELFN2|FKBP15|PCIF1|PPP1R26|PPP1R36|SFI1|ZCCHC9	http://amigo.geneontology.org/amigo/term/GO:0010923
negative regulation of dephosphorylation	biological_process	GO:0035305	7	8	1.02971245	0.01748	0.379921854	ELFN2|FKBP15|PCIF1|PPP1R26|PPP1R36|SFI1|ZCCHC9	http://amigo.geneontology.org/amigo/term/GO:0035305
negative regulation of protein dephosphorylation	biological_process	GO:0035308	7	8	1.02971245	0.01748	0.379921854	ELFN2|FKBP15|PCIF1|PPP1R26|PPP1R36|SFI1|ZCCHC9	http://amigo.geneontology.org/amigo/term/GO:0035308
regulation of neuron differentiation	biological_process	GO:0045664	7	8	1.02971245	0.01748	0.379921854	57f7a64a-d428-427a-9011-899e91a22b36|CAPRIN1|LRRC4C|MAPK6|RETREG3|ZC4H2|ZSWIM6	http://amigo.geneontology.org/amigo/term/GO:0045664
protein modification by small protein removal	biological_process	GO:0070646	7	8	1.02971245	0.01748	0.379921854	GPS1|JOSD1|MINDY2|OTUD7A|SENP5|USP53|USP54	http://amigo.geneontology.org/amigo/term/GO:0070646
spliceosomal complex assembly	biological_process	GO:0000245	5	5	1.176814228	0.01795	0.379921854	CELF2|LUC7L|LUC7L3|SF3A2|SF3B1	http://amigo.geneontology.org/amigo/term/GO:0000245
N-terminal protein amino acid modification	biological_process	GO:0031365	5	5	1.176814228	0.01795	0.379921854	HHATL|METTL11B|NAA30|NMT1|NMT2	http://amigo.geneontology.org/amigo/term/GO:0031365
ERAD pathway	biological_process	GO:0036503	5	5	1.176814228	0.01795	0.379921854	79da57f9-7126-4f66-97fc-a1906cff5fcb|EDEM3|ERLEC1|ERLIN2|FOXRED2	http://amigo.geneontology.org/amigo/term/GO:0036503
positive regulation of cell differentiation	biological_process	GO:0045597	5	5	1.176814228	0.01795	0.379921854	CAPRIN1|GATA3|MAPK6|RETREG3|ZC4H2	http://amigo.geneontology.org/amigo/term/GO:0045597
neurogenesis	biological_process	GO:0022008	19	29	0.771016218	0.0195	0.402077419	2058d621-ab91-45be-b7be-de67b56ec3f8|57f7a64a-d428-427a-9011-899e91a22b36|CAMSAP1|CAMSAP2|CAPRIN1|ccc14945-586a-4a6a-a706-59609f80b83e|CNTN1|DPYSL5|GRIP1|IGSF10|LRRC4C|MAPK6|MAPRE3|NAV1|NAV2|NAV3|RETREG3|ZC4H2|ZSWIM6	http://amigo.geneontology.org/amigo/term/GO:0022008
regulation of actin polymerization or depolymerization	biological_process	GO:0008064	10	13	0.905241714	0.01941	0.402077419	ACTR3B|ARPC5|ARPC5L|CAPZA2|GMFB|KANK3|LMOD3|LOC101792346|PLEKHH2|WASHC1	http://amigo.geneontology.org/amigo/term/GO:0008064
regulation of actin filament length	biological_process	GO:0030832	10	13	0.905241714	0.01941	0.402077419	ACTR3B|ARPC5|ARPC5L|CAPZA2|GMFB|KANK3|LMOD3|LOC101792346|PLEKHH2|WASHC1	http://amigo.geneontology.org/amigo/term/GO:0030832
positive regulation of developmental process	biological_process	GO:0051094	10	13	0.905241714	0.01941	0.402077419	1961e84c-aa73-4203-8ad1-36b9def555b5|ADAM12|CAPRIN1|DDHD1|GATA3|MAPK6|MIEF1|RETREG3|TPBG|ZC4H2	http://amigo.geneontology.org/amigo/term/GO:0051094
negative regulation of cellular protein metabolic process	biological_process	GO:0032269	14	20	0.82376996	0.02017	0.41322641	BUB1B|CAAP1|ELFN2|FKBP15|HHATL|PCIF1|PPP1R26|PPP1R36|PRMT3|SFI1|TNRC6B|TNRC6C|ZCCHC9|ZFYVE28	http://amigo.geneontology.org/amigo/term/GO:0032269
regulation of protein modification process	biological_process	GO:0031399	21	33	0.748881782	0.02232	0.45148557	bef8fa78-c9af-4cd7-b583-113b96fdb6c8|BUB1B|CCNY|CCNYL1|CNPPD1|DCUN1D1|DOK7|ELFN2|FKBP15|FZR1|HHATL|PCIF1|PPP1R26|PPP1R36|PPP6R3|PRMT3|PUM3|RELL1|SFI1|ZCCHC9|ZFYVE28	http://amigo.geneontology.org/amigo/term/GO:0031399
cell redox homeostasis	biological_process	GO:0045454	21	33	0.748881782	0.02232	0.45148557	DLD|DNAJC16|GLRX5|NHLRC2|NXN|PDIA4|PDIA6|PRDX4|PRDX6|PTGES2|QSOX2|SEC22A|SH3BGRL3|TMX1|TMX3|TMX4|TXNDC11|TXNDC12|TXNDC15|TXNDC16|TXNDC9	http://amigo.geneontology.org/amigo/term/GO:0045454
cell cycle	biological_process	GO:0007049	37	64	0.680345726	0.02378	0.477992956	ATRIP|bccb42f0-f925-4476-b41e-47de222f2b90|BUB1B|CABLES1|CABLES2|CCNDBP1|CCNG2|CCNY|CCNYL1|CDC25A|cdd244ad-b5e6-49ff-acaf-5bc56b6d6b34|CNPPD1|CROCC|CSPP1|DSCC1|E2F4|GADD45A|GADD45B|HECA|HORMAD2|KIZ|LOC101801770|LOC106017999|LSM10|MAU2|NCAPD3|NCAPG|PRR11|REEP3|SASS6|SDCCAG8|SGO1|SGO2|SMC2|WEE1|ZW10|ZWILCH	http://amigo.geneontology.org/amigo/term/GO:0007049
negative regulation of protein modification process	biological_process	GO:0031400	11	15	0.862997101	0.02425	0.48439375	BUB1B|ELFN2|FKBP15|HHATL|PCIF1|PPP1R26|PPP1R36|PRMT3|SFI1|ZCCHC9|ZFYVE28	http://amigo.geneontology.org/amigo/term/GO:0031400
regulation of phosphatase activity	biological_process	GO:0010921	8	10	0.941451383	0.02637	0.523469068	ELFN2|FKBP15|PCIF1|PPP1R26|PPP1R36|PPP6R3|SFI1|ZCCHC9	http://amigo.geneontology.org/amigo/term/GO:0010921
positive regulation of macromolecule biosynthetic process	biological_process	GO:0010557	17	26	0.769455457	0.02746	0.535135122	a56e8f2e-fc94-45ea-b49c-dd6fc80d8b68|ANKRD49|CHD6|CREB5|DHX29|ELF2|ETV4|GABPB2|GATA6|HMBOX1|KDM7A|MALT1|MLLT10|MRTFA|PHF2|SUPT4H1|TEF	http://amigo.geneontology.org/amigo/term/GO:0010557
dephosphorylation	biological_process	GO:0016311	17	26	0.769455457	0.02746	0.535135122	ceb61a56-1039-4b2a-9b62-1708c0788339|CTDP1|ELFN2|FKBP15|INPP5D|INPP5K|MTMR1|MTMR6|PCIF1|PDP1|PLPP6|PPP1R26|PPP1R36|PPP6R3|SFI1|SYNJ2|ZCCHC9	http://amigo.geneontology.org/amigo/term/GO:0016311
positive regulation of nitrogen compound metabolic process	biological_process	GO:0051173	17	26	0.769455457	0.02746	0.535135122	a56e8f2e-fc94-45ea-b49c-dd6fc80d8b68|ANKRD49|CHD6|CREB5|DHX29|ELF2|ETV4|GABPB2|GATA6|HMBOX1|KDM7A|MALT1|MLLT10|MRTFA|PHF2|SUPT4H1|TEF	http://amigo.geneontology.org/amigo/term/GO:0051173
regulation of cellular protein metabolic process	biological_process	GO:0032268	28	47	0.701080817	0.02876	0.550400958	bef8fa78-c9af-4cd7-b583-113b96fdb6c8|BUB1B|CAAP1|CCNY|CCNYL1|CNPPD1|DCUN1D1|DDA1|DHX29|DOK7|ELFN2|FKBP15|FZR1|HHATL|NANOS1|PCIF1|PM20D2|PPP1R26|PPP1R36|PPP6R3|PRMT3|PUM3|RELL1|SFI1|TNRC6B|TNRC6C|ZCCHC9|ZFYVE28	http://amigo.geneontology.org/amigo/term/GO:0032268
negative regulation of molecular function	biological_process	GO:0044092	12	17	0.830692396	0.02861	0.550400958	ac1c2d4e-dafd-4642-a48a-efa9374b5ecf|ATP5IF1|BUB1B|CAAP1|ELFN2|FKBP15|PCIF1|PPP1R26|PPP1R36|SFI1|ZCCHC9|ZFYVE28	http://amigo.geneontology.org/amigo/term/GO:0044092
regulation of hydrolase activity	biological_process	GO:0051336	12	17	0.830692396	0.02861	0.550400958	ATP5IF1|CAAP1|ELFN2|FKBP15|PCIF1|PPP1R26|PPP1R36|PPP6R3|SBF2|SFI1|SNX13|ZCCHC9	http://amigo.geneontology.org/amigo/term/GO:0051336
cell development	biological_process	GO:0048468	18	28	0.756523432	0.02943	0.559870714	2058d621-ab91-45be-b7be-de67b56ec3f8|57f7a64a-d428-427a-9011-899e91a22b36|AFF4|CAMSAP1|CAMSAP2|CAPRIN1|ccc14945-586a-4a6a-a706-59609f80b83e|CNTN1|DPYSL5|GRIP1|IGSF10|LDB3|LRRC4C|MAPK6|MAPRE3|RETREG3|ZC4H2|ZSWIM6	http://amigo.geneontology.org/amigo/term/GO:0048468
ncRNA metabolic process	biological_process	GO:0034660	54	99	0.64189867	0.03069	0.580386036	4568fa11-bb65-42fe-910f-67d9665cb647|a965c8c2-4135-4773-af63-c6855c307e80|AARS|ADAT1|ADAT2|ANKRD16|BUD23|CARS|CARS2|CDK5RAP1|d7458832-8bff-4fb5-8833-68a719ffab95|DARS|DARS2|DGCR8|DIS3L|ELAC2|FARS2|FTSJ3|INTS1|INTS10|INTS12|INTS2|KARS|KIAA0391|KRR1|LOC101791669|LOC101795091|MARS2|MTO1|NARS|NARS2|NOP2|PARS2|PES1|POP5|PUS3|QARS|RARS|RARS2|RBFA|REXO4|RRP36|RRP9|TARS|TSEN2|TSEN54|USB1|UTP14A|UTP20|UTP…	http://amigo.geneontology.org/amigo/term/GO:0034660
chromosome organization	biological_process	GO:0051276	51	93	0.645349738	0.03124	0.587312	204da7fd-91a7-4c54-a6f6-66a386b5cf17|72b8c39a-4b1b-469e-82fb-92999f428fe0|ACTL6A|ARID1A|ARID1B|BAZ1A|BRD1|BRPF3|BUB1B|CABIN1|CENPC|CENPH|CENPI|CENPK|CENPO|CENPP|CENPT|CHAF1A|CHAF1B|CSPG5|DR1|DSCC1|EED|EZH1|feadf5ad-a8ac-40ed-876a-8181bc877b90|HORMAD2|INO80C|KMT5B|LOC101789642|LOC101790011|LOC101797202|LOC101798499|LOC101801533|MAU2|NAP1L4|NCAPD3|NCAPG|PBRM1|PHC1|PHF2|RCOR1|SET|SGO1|SGO2|SMC2|SMC3…	http://amigo.geneontology.org/amigo/term/GO:0051276
macromolecule catabolic process	biological_process	GO:0009057	42	75	0.659015968	0.03215	0.60088538	79da57f9-7126-4f66-97fc-a1906cff5fcb|ABHD13|BAP1|BUB1B|CUL5|DCP1B|DDA1|DIS3L|EDC3|EDEM3|ELOC|ERLEC1|ERLIN2|FBXL22|FOXRED2|LOC101801212|LOC101801987|LOC101805398|LOC113840922|PSMA4|PSMA7|PSMB2|PSMB3|PSMC1|PSMC2|PSMC6|PSMD1|PSMD2|PSMD6|RNF150|SMG8|SMURF1|SMURF2|SNF8|TRPC4AP|UBAP1|UBE3A|UBR1|UBR4|UFD1|UPF1|WWP2	http://amigo.geneontology.org/amigo/term/GO:0009057
negative regulation of transcription from RNA polymerase II promoter	biological_process	GO:0000122	9	12	0.882610671	0.03418	0.60882044	CREM|CXXC5|HEXIM1|LOC101793178|MXI1|NELFA|PHF12|TCERG1|ZBTB2	http://amigo.geneontology.org/amigo/term/GO:0000122
proteasomal protein catabolic process	biological_process	GO:0010498	9	12	0.882610671	0.03418	0.60882044	79da57f9-7126-4f66-97fc-a1906cff5fcb|BUB1B|DDA1|ERLIN2|FBXL22|FOXRED2|PSMB3|PSMD6|UBR1	http://amigo.geneontology.org/amigo/term/GO:0010498
regulation of actin filament polymerization	biological_process	GO:0030833	9	12	0.882610671	0.03418	0.60882044	ACTR3B|ARPC5|ARPC5L|CAPZA2|GMFB|KANK3|LMOD3|LOC101792346|WASHC1	http://amigo.geneontology.org/amigo/term/GO:0030833
regulation of protein polymerization	biological_process	GO:0032271	9	12	0.882610671	0.03418	0.60882044	ACTR3B|ARPC5|ARPC5L|CAPZA2|GMFB|KANK3|LMOD3|LOC101792346|WASHC1	http://amigo.geneontology.org/amigo/term/GO:0032271
regulation of phosphorylation	biological_process	GO:0042325	9	12	0.882610671	0.03418	0.60882044	bef8fa78-c9af-4cd7-b583-113b96fdb6c8|CCNY|CCNYL1|CNPPD1|DOK7|PPP1R14C|PPP1R14D|RELL1|ZFYVE28	http://amigo.geneontology.org/amigo/term/GO:0042325
proteasome-mediated ubiquitin-dependent protein catabolic process	biological_process	GO:0043161	9	12	0.882610671	0.03418	0.60882044	79da57f9-7126-4f66-97fc-a1906cff5fcb|BUB1B|DDA1|ERLIN2|FBXL22|FOXRED2|PSMB3|PSMD6|UBR1	http://amigo.geneontology.org/amigo/term/GO:0043161
spliceosomal snRNP assembly	biological_process	GO:0000387	6	7	1.00869791	0.03467	0.60882044	AAR2|GEMIN8|PRPF3|SNRPD1|SNRPD3|SNRPF	http://amigo.geneontology.org/amigo/term/GO:0000387
regulation of neuron projection development	biological_process	GO:0010975	6	7	1.00869791	0.03467	0.60882044	57f7a64a-d428-427a-9011-899e91a22b36|CAPRIN1|LRRC4C|MAPK6|RETREG3|ZSWIM6	http://amigo.geneontology.org/amigo/term/GO:0010975
ARF protein signal transduction	biological_process	GO:0032011	6	7	1.00869791	0.03467	0.60882044	CYTH3|CYTH4|GBF1|IQSEC3|PSD2|PSD3	http://amigo.geneontology.org/amigo/term/GO:0032011
regulation of ARF protein signal transduction	biological_process	GO:0032012	6	7	1.00869791	0.03467	0.60882044	CYTH3|CYTH4|GBF1|IQSEC3|PSD2|PSD3	http://amigo.geneontology.org/amigo/term/GO:0032012
negative regulation of cytoskeleton organization	biological_process	GO:0051494	6	7	1.00869791	0.03467	0.60882044	CAPZA2|GMFB|KANK3|LMOD3|LOC101792346|PLEKHH2	http://amigo.geneontology.org/amigo/term/GO:0051494
positive regulation of macromolecule metabolic process	biological_process	GO:0010604	22	36	0.719164251	0.03538	0.617893333	a56e8f2e-fc94-45ea-b49c-dd6fc80d8b68|ANKRD49|bef8fa78-c9af-4cd7-b583-113b96fdb6c8|CHD6|CREB5|DCUN1D1|DHX29|DOK7|ELF2|ETV4|FZR1|GABPB2|GATA6|HMBOX1|KDM7A|MALT1|MLLT10|MRTFA|PHF2|RELL1|SUPT4H1|TEF	http://amigo.geneontology.org/amigo/term/GO:0010604
organic cyclic compound biosynthetic process	biological_process	GO:1901362	233	478	0.573635387	0.03569	0.619919783	04fa9dce-dc3a-4b00-90c6-89990774e24d|252d3981-8a9d-4cb3-8159-0d5cd1c32c16|4b498d98-ca4b-4123-9d28-34337916beda|657aad42-7332-4252-b03c-d90c32d100da|8647195e-ba82-4e3b-8eaa-9c82e3edc575|9253c9db-3192-42dd-af3e-0e3932e13f2f|a56e8f2e-fc94-45ea-b49c-dd6fc80d8b68|ADA|ADSS|ADSSL1|ae64c188-4378-4662-abf3-22d4eaa4b615|AES|AMPD1|AMPD2|ANKRD49|ARID2|ARID4B|ARID5B|ATF1|ATF3|ATP5ME|ATP5PB|ATP5PO|ATP6|BARX2|B…	http://amigo.geneontology.org/amigo/term/GO:1901362
developmental process	biological_process	GO:0032502	99	193	0.603650822	0.037	0.622754563	1961e84c-aa73-4203-8ad1-36b9def555b5|2058d621-ab91-45be-b7be-de67b56ec3f8|4e1b498d-bcf5-4742-9885-576c809b4f19|538b4b50-9ce6-42ce-ada1-81732b50cf03|57f7a64a-d428-427a-9011-899e91a22b36|594e5d7a-7a44-4ff4-beb2-34389ee9977a|6117fb1b-7eab-4317-8294-249985587b5d|8148980a-db43-49bf-86fd-f9f909246a87|a1170176-b91a-47fa-be5e-e88081cfbe13|ADAM12|AFF4|ATOH8|BBX|C1H12orf29|C1H2orf49|CAMSAP1|CAMSAP2|CAPRIN1…	http://amigo.geneontology.org/amigo/term/GO:0032502
regulation of signal transduction	biological_process	GO:0009966	58	108	0.631992826	0.03693	0.622754563	ABRA|ad5ce991-c450-4184-8a1d-30a276cc21d9|AKAP1|AKIP1|ANKS1A|ARHGEF10L|ARHGEF16|ARHGEF39|ARHGEF9|CAAP1|CDC42SE2|CNKSR2|CNKSR3|CYTH3|CYTH4|DDIT4|DLK1|FAM53B|FARP1|FARP2|FGD3|GARNL3|GBF1|GPC4|GPC6|INVS|IQSEC3|KALRN|KLHL24|LOC101801720|LOC101803486|LURAP1L|LY86|NCLN|NETO2|NGEF|OBSCN|PIAS2|PLEKHG1|PLEKHG4|PPP1R2|PRDM16|PSD2|PSD3|RALGAPA1|RALGAPA2|RALGAPB|RASA3|RELL1|RGS2|SH3BP4|SHOC2|SIPA1L2|SKOR2|SP…	http://amigo.geneontology.org/amigo/term/GO:0009966
cellular response to stress	biological_process	GO:0033554	50	92	0.63957295	0.03953	0.622754563	79da57f9-7126-4f66-97fc-a1906cff5fcb|992c0e8b-f53d-4f57-8161-cbdee95dec6d|ACBD5|ANKZF1|APTX|ARPP21|ATRIP|CHD6|DDB2|DEK|EDEM3|EEPD1|EME1|ERLEC1|ERLIN2|FANCF|FOXRED2|INIP|LOC101799732|LOC101799833|MAPK14|MGME1|MGMT|MNAT1|MPG|NPLOC4|NSMCE2|PALB2|PARPBP|PAXX|PMS1|PMS2|POLI|POLL|PPP4R2|PYROXD1|RAD51B|RELL1|RETREG1|REV3L|RNF168|RNF8|RPS6KA6|SHLD1|SPRTN|TDG|TECPR1|UIMC1|WDR76|WIPI2	http://amigo.geneontology.org/amigo/term/GO:0033554
mitochondrion organization	biological_process	GO:0007005	27	46	0.690738786	0.0396	0.622754563	62297c41-98fc-4ea9-bbff-d3eaaf8c3467|ATAD3A|CHCHD1|CLUH|DARS2|DDHD1|DNAJC11|FASTKD5|GFM1|MGME1|MIEF1|MIPEP|MRPL16|MRPL2|NDUFAF1|NDUFAF4|PMPCA|POLRMT|PTCD3|SDHAF3|SLC25A46|SMIM20|TIMM22|TIMM44|TMEM11|TMEM70|TOMM22	http://amigo.geneontology.org/amigo/term/GO:0007005
positive regulation of cellular metabolic process	biological_process	GO:0031325	23	38	0.712282296	0.03647	0.622754563	a56e8f2e-fc94-45ea-b49c-dd6fc80d8b68|ANKRD49|bef8fa78-c9af-4cd7-b583-113b96fdb6c8|CHD6|CREB5|DCUN1D1|DHRSX|DHX29|DOK7|ELF2|ETV4|FZR1|GABPB2|GATA6|HMBOX1|KDM7A|MALT1|MLLT10|MRTFA|PHF2|RELL1|SUPT4H1|TEF	http://amigo.geneontology.org/amigo/term/GO:0031325
ribosome biogenesis	biological_process	GO:0042254	23	38	0.712282296	0.03647	0.622754563	371b58f5-04cd-40d9-a0a5-0310dcdec9e0|4568fa11-bb65-42fe-910f-67d9665cb647|96a811c1-6931-43fc-a2b5-f6eaa9c9c9fa|BMS1|BUD23|FTSJ3|KRR1|MDN1|NMD3|NOC4L|NOP2|PES1|RBFA|REXO4|RRP36|RRP9|SBDS|SURF6|TSR1|UTP14A|UTP20|UTP23|WDR55	http://amigo.geneontology.org/amigo/term/GO:0042254
regulation of cytoskeleton organization	biological_process	GO:0051493	15	23	0.76748754	0.03885	0.622754563	ACTR3B|ARPC5|ARPC5L|CAPZA2|GMFB|KANK3|KATNBL1|LMOD3|LOC101792346|LOC101804876|LOC106015869|MAPRE1|PLEKHH2|STMN4|WASHC1	http://amigo.geneontology.org/amigo/term/GO:0051493
transcription initiation from RNA polymerase II promoter	biological_process	GO:0006367	4	4	1.176814228	0.04014	0.622754563	GTF2A2|TAF11|TAF5|TAF7L	http://amigo.geneontology.org/amigo/term/GO:0006367
establishment or maintenance of cell polarity	biological_process	GO:0007163	4	4	1.176814228	0.04014	0.622754563	8f6ab479-09c1-4e6f-997a-0c140d541ffb|FRMD4B|LLGL2|PARD6A	http://amigo.geneontology.org/amigo/term/GO:0007163
regulation of autophagy	biological_process	GO:0010506	4	4	1.176814228	0.04014	0.622754563	DHRSX|MTCL1|SOGA1|SOGA3	http://amigo.geneontology.org/amigo/term/GO:0010506
positive regulation of cell development	biological_process	GO:0010720	4	4	1.176814228	0.04014	0.622754563	CAPRIN1|MAPK6|RETREG3|ZC4H2	http://amigo.geneontology.org/amigo/term/GO:0010720
dendrite development	biological_process	GO:0016358	4	4	1.176814228	0.04014	0.622754563	CAPRIN1|ccc14945-586a-4a6a-a706-59609f80b83e|GRIP1|MAPK6	http://amigo.geneontology.org/amigo/term/GO:0016358
histone methylation	biological_process	GO:0016571	4	4	1.176814228	0.04014	0.622754563	EED|EZH1|feadf5ad-a8ac-40ed-876a-8181bc877b90|KMT5B	http://amigo.geneontology.org/amigo/term/GO:0016571
positive regulation of neuron differentiation	biological_process	GO:0045666	4	4	1.176814228	0.04014	0.622754563	CAPRIN1|MAPK6|RETREG3|ZC4H2	http://amigo.geneontology.org/amigo/term/GO:0045666
positive regulation of cell cycle	biological_process	GO:0045787	4	4	1.176814228	0.04014	0.622754563	CDC25A|CSPP1|LOC106017999|LSM10	http://amigo.geneontology.org/amigo/term/GO:0045787
vascular endothelial growth factor receptor signaling pathway	biological_process	GO:0048010	4	4	1.176814228	0.04014	0.622754563	FLT1|FLT4|KDR|LOC101797327	http://amigo.geneontology.org/amigo/term/GO:0048010
rhythmic process	biological_process	GO:0048511	4	4	1.176814228	0.04014	0.622754563	ENOX1|ENOX2|NOCT|PER3	http://amigo.geneontology.org/amigo/term/GO:0048511
positive regulation of neurogenesis	biological_process	GO:0050769	4	4	1.176814228	0.04014	0.622754563	CAPRIN1|MAPK6|RETREG3|ZC4H2	http://amigo.geneontology.org/amigo/term/GO:0050769
kinetochore assembly	biological_process	GO:0051382	4	4	1.176814228	0.04014	0.622754563	CENPC|CENPH|CENPK|CENPT	http://amigo.geneontology.org/amigo/term/GO:0051382
kinetochore organization	biological_process	GO:0051383	4	4	1.176814228	0.04014	0.622754563	CENPC|CENPH|CENPK|CENPT	http://amigo.geneontology.org/amigo/term/GO:0051383
canonical Wnt signaling pathway	biological_process	GO:0060070	4	4	1.176814228	0.04014	0.622754563	BCL9|BCL9L|FAM53B|INVS	http://amigo.geneontology.org/amigo/term/GO:0060070
positive regulation of cell cycle process	biological_process	GO:0090068	4	4	1.176814228	0.04014	0.622754563	CDC25A|CSPP1|LOC106017999|LSM10	http://amigo.geneontology.org/amigo/term/GO:0090068
protein dephosphorylation	biological_process	GO:0006470	10	14	0.840581592	0.04086	0.624825646	CTDP1|ELFN2|FKBP15|PCIF1|PDP1|PPP1R26|PPP1R36|PPP6R3|SFI1|ZCCHC9	http://amigo.geneontology.org/amigo/term/GO:0006470
actin filament polymerization	biological_process	GO:0030041	10	14	0.840581592	0.04086	0.624825646	ACTR3B|ARPC5|ARPC5L|CAPZA2|GMFB|KANK3|LMOD3|LOC101792346|LOC101793940|WASHC1	http://amigo.geneontology.org/amigo/term/GO:0030041
regulation of nervous system development	biological_process	GO:0051960	10	14	0.840581592	0.04086	0.624825646	1961e84c-aa73-4203-8ad1-36b9def555b5|57f7a64a-d428-427a-9011-899e91a22b36|CAPRIN1|IGSF10|LRRC4C|MAPK6|RETREG3|TPBG|ZC4H2|ZSWIM6	http://amigo.geneontology.org/amigo/term/GO:0051960
regulation of protein metabolic process	biological_process	GO:0051246	32	56	0.672465273	0.04149	0.628445687	bef8fa78-c9af-4cd7-b583-113b96fdb6c8|BUB1B|CAAP1|CCNY|CCNYL1|CNPPD1|DCUN1D1|DDA1|DHX29|DOK7|ELFN2|ERLEC1|FKBP15|FZR1|HHATL|MAST2|NANOS1|PCIF1|PM20D2|PPP1R26|PPP1R36|PPP6R3|PRMT3|PSMD1|PSMD2|PUM3|RELL1|SFI1|TNRC6B|TNRC6C|ZCCHC9|ZFYVE28	http://amigo.geneontology.org/amigo/term/GO:0051246
positive regulation of nucleobase-containing compound metabolic process	biological_process	GO:0045935	16	25	0.753161106	0.04145	0.628445687	a56e8f2e-fc94-45ea-b49c-dd6fc80d8b68|ANKRD49|CHD6|CREB5|ELF2|ETV4|GABPB2|GATA6|HMBOX1|KDM7A|MALT1|MLLT10|MRTFA|PHF2|SUPT4H1|TEF	http://amigo.geneontology.org/amigo/term/GO:0045935
cell differentiation	biological_process	GO:0030154	39	70	0.655653641	0.04181	0.630305472	2058d621-ab91-45be-b7be-de67b56ec3f8|57f7a64a-d428-427a-9011-899e91a22b36|a1170176-b91a-47fa-be5e-e88081cfbe13|AFF4|ATOH8|C1H12orf29|CAMSAP1|CAMSAP2|CAPRIN1|ccc14945-586a-4a6a-a706-59609f80b83e|CMTM7|CNTN1|d90837cf-c751-4598-b7b5-9a2a5fe4bd52|DPYSL5|FOXN2|GATA3|GRIP1|HLF|IGSF10|LAMB3|LDB3|LOC101791263|LRRC4C|MAPK6|MAPRE3|NAV1|NAV2|NAV3|NOC3L|OCIAD1|PLEKHM3|PLPP7|PRR7|RETREG3|SDF4|ZBTB24|ZC4H2|ZFA…	http://amigo.geneontology.org/amigo/term/GO:0030154
positive regulation of biosynthetic process	biological_process	GO:0009891	17	27	0.740957107	0.04372	0.652939813	a56e8f2e-fc94-45ea-b49c-dd6fc80d8b68|ANKRD49|CHD6|CREB5|DHX29|ELF2|ETV4|GABPB2|GATA6|HMBOX1|KDM7A|MALT1|MLLT10|MRTFA|PHF2|SUPT4H1|TEF	http://amigo.geneontology.org/amigo/term/GO:0009891
positive regulation of cellular biosynthetic process	biological_process	GO:0031328	17	27	0.740957107	0.04372	0.652939813	a56e8f2e-fc94-45ea-b49c-dd6fc80d8b68|ANKRD49|CHD6|CREB5|DHX29|ELF2|ETV4|GABPB2|GATA6|HMBOX1|KDM7A|MALT1|MLLT10|MRTFA|PHF2|SUPT4H1|TEF	http://amigo.geneontology.org/amigo/term/GO:0031328
transmembrane receptor protein serine/threonine kinase signaling pathway	biological_process	GO:0007178	11	16	0.809059782	0.04653	0.688471667	LOC110352107|MTMR4|SKOR2|SMAD1|SMAD2|SMAD3|SMAD4|SMAD5|SMAD7|SMAD9|ZFYVE9	http://amigo.geneontology.org/amigo/term/GO:0007178
regulation of cell differentiation	biological_process	GO:0045595	11	16	0.809059782	0.04653	0.688471667	57f7a64a-d428-427a-9011-899e91a22b36|CAPRIN1|GATA3|IGSF10|LRRC4C|MAPK6|OCIAD1|PLPP7|RETREG3|ZC4H2|ZSWIM6	http://amigo.geneontology.org/amigo/term/GO:0045595
system development	biological_process	GO:0048731	55	103	0.628395947	0.04675	0.688539171	1961e84c-aa73-4203-8ad1-36b9def555b5|2058d621-ab91-45be-b7be-de67b56ec3f8|4e1b498d-bcf5-4742-9885-576c809b4f19|538b4b50-9ce6-42ce-ada1-81732b50cf03|57f7a64a-d428-427a-9011-899e91a22b36|6117fb1b-7eab-4317-8294-249985587b5d|a1170176-b91a-47fa-be5e-e88081cfbe13|ADAM12|BBX|C1H12orf29|CAMSAP1|CAMSAP2|CAPRIN1|ccc14945-586a-4a6a-a706-59609f80b83e|CLMP|CMTM7|CNTN1|DPYSL5|ENC1|EYA1|FOXN2|GATA3|GFRA1|GRIP1…	http://amigo.geneontology.org/amigo/term/GO:0048731
cell morphogenesis involved in differentiation	biological_process	GO:0000904	7	9	0.915299955	0.04822	0.700505091	57f7a64a-d428-427a-9011-899e91a22b36|CAPRIN1|ccc14945-586a-4a6a-a706-59609f80b83e|DPYSL5|LRRC4C|MAPRE3|ZSWIM6	http://amigo.geneontology.org/amigo/term/GO:0000904
cell morphogenesis involved in neuron differentiation	biological_process	GO:0048667	7	9	0.915299955	0.04822	0.700505091	57f7a64a-d428-427a-9011-899e91a22b36|CAPRIN1|ccc14945-586a-4a6a-a706-59609f80b83e|DPYSL5|LRRC4C|MAPRE3|ZSWIM6	http://amigo.geneontology.org/amigo/term/GO:0048667
neuron projection morphogenesis	biological_process	GO:0048812	7	9	0.915299955	0.04822	0.700505091	57f7a64a-d428-427a-9011-899e91a22b36|CAPRIN1|ccc14945-586a-4a6a-a706-59609f80b83e|DPYSL5|LRRC4C|MAPRE3|ZSWIM6	http://amigo.geneontology.org/amigo/term/GO:0048812
