# Supplementary material for: Profiling Analysis of N6-Methyladenosine mRNA Methylation Reveals Differential m6A Patterns during the Embryonic Skeletal Muscle Development of Ducks
Source: Animals (Basel). 2022 Sep 28;12(19):2593. doi: 10.3390/ani12192593 (PMC9559603; doi:10.3390/ani12192593)
Supplement: Supplementary file 1 [file animals-12-02593-s001.zip › Table S6.xls]

Term	Database	ID	Input_number	Background_number	Rich_factor	P_Value	FDR	Input	Hyperlink
Lysosome	KEGG PATHWAY	ko04142	43	102	2.031143891	7.27E-07	1.09E-47	K12394:AP1S2|K12404:GGA3,GGA1|K12396:AP3D1|K12397:AP3B2,AP3B1|K12390:CLN5|K12391:AP1G1|K01365:CTSL|K12399:AP3S2,AP3S1|K01444:AGA|K01369:LGMN|K02155:ATP6V0C|K08568:CTSZ|K04645:LOC113839618|K04644:LOC101793731|K06129:PLA2G15|K12384:SCARB2|K12347:SLC11A2|K12350:SMPD1|K01275:CTSC|K05656:ABCB9|K12307:MFSD8|K14410:ACP2|K01279:TPP1|K12348:ASAH1|K12383:GM2A|K12401:AP4B1|K10089:M6PR|K10087:GNPTG|K01374:CT…	https://www.kegg.jp/kegg-bin/show_pathway?ko04142/K12394%09red/K12404%09red/K12396%09red/K12397%09red/K12390%09red/K12391%09red/K01365%09red/K12399%09red/K01444%09red/K01369%09red/K02155%09red/K08568%09red/K04645%09red/K04644%09red/K06129%09red/K12384%09red/K12347%09red/K12350%09red/K01275%09red/K05656%09red/K12307%09red/K14410%09red/K01279%09red/K12348%09red/K12383%09red/K12401%09red/K10089%09re…
Apoptosis - fly	KEGG PATHWAY	ko04214	28	56	2.409031127	1.06E-06	7.73E-33	K04412:STK3|K08791:LATS2,3e6cb00b-71cd-4489-9df1-e8d01ebfd0c2,LATS1|K02561:BOK|K04427:LOC101800996|K03386:PRDX4|K03262:EIF5|K09428:ELF1,ELF2|K04398:CASP8|K10798:PARP3,PARP1|K09848:TRAF4|K08738:LOC113841161,CYC|K20216:DUSP10|K04440:MAPK9,MAPK8|K04448:JUN|K04374:8ddd9e5e-2fd9-47f0-8e91-e094ab22b3c5|K08860:EIF2AK3|K04728:ATM|K10586:BIRC6|K04404:TAB2|K16686:SAV1|K04725:XIAP|K03175:TRAF6|K04361:EGFR|K…	https://www.kegg.jp/kegg-bin/show_pathway?ko04214/K04412%09red/K08791%09red/K02561%09red/K04427%09red/K03386%09red/K03262%09red/K09428%09red/K04398%09red/K10798%09red/K09848%09red/K08738%09red/K20216%09red/K04440%09red/K04448%09red/K04374%09red/K08860%09red/K04728%09red/K10586%09red/K04404%09red/K16686%09red/K04725%09red/K03175%09red/K04361%09red/K08669%09red/K07611%09red/K06640%09red/K07827%09re…
Toxoplasmosis	KEGG PATHWAY	ko05145	43	94	2.204007201	4.33E-08	3.29E-29	K04694:SOCS1|K04692:STAT3|K02187:CASP3|K04534:LOC101791437,LOC113844914|K10159:LOC110351185|K08738:LOC113841161,CYC|K11220:STAT1|K03160:CD40|K04398:CASP8|K05719:ITGB1|K05636:LAMB1|K05635:LAMC1|K04441:MAPK12,MAPK14|K04440:MAPK9,MAPK8|K04447:JAK2|K05132:IFNGR1|K06244:LAMB3|K05134:IL10RA|K02649:PIK3R5,PIK3R2,PIK3R1,LOC101795759|K06240:LAMA5|K04427:LOC101800996|K04734:NFKBIA|K16060:BIRC2|K04180:LOC10…	https://www.kegg.jp/kegg-bin/show_pathway?ko05145/K04694%09red/K04692%09red/K02187%09red/K04534%09red/K10159%09red/K08738%09red/K11220%09red/K03160%09red/K04398%09red/K05719%09red/K05636%09red/K05635%09red/K04441%09red/K04440%09red/K04447%09red/K05132%09red/K06244%09red/K05134%09red/K02649%09red/K06240%09red/K04427%09red/K04734%09red/K16060%09red/K04180%09red/K04404%09red/K03158%09red/K04725%09re…
Thyroid hormone synthesis	KEGG PATHWAY	ko04918	25	49	2.458195027	2.49E-06	3.43E-28	K02677:PRKCA|K05870:CREB1|K15173:TTF2|K08042:ADCY2|K09487:HSP90B1|K08047:ADCY7|K08045:ADCY5|K08049:ADCY9|K09582:PDIA4|K04374:8ddd9e5e-2fd9-47f0-8e91-e094ab22b3c5|K01539:ATP1A1|K09048:CREB3,CREB3L2,CREB3L1|K05251:TSHB|K09047:CREB5|K05858:PLCB1,PLCB4,PLCB2|K08054:CANX|K04345:PRKACB|K19662:PRKCB|K15225:TTF1|K04958:ITPR1|K01540:ATP1B3,ATP1B1|K10809:TG|K00432:GPX7|K04632:GNAS|K04634:LOC101794123,LOC10…	https://www.kegg.jp/kegg-bin/show_pathway?ko04918/K02677%09red/K05870%09red/K15173%09red/K08042%09red/K09487%09red/K08047%09red/K08045%09red/K08049%09red/K09582%09red/K04374%09red/K01539%09red/K09048%09red/K05251%09red/K09047%09red/K05858%09red/K08054%09red/K04345%09red/K19662%09red/K15225%09red/K04958%09red/K01540%09red/K10809%09red/K00432%09red/K04632%09red/K04634%09red/
Glioma	KEGG PATHWAY	ko05214	33	47	3.382894774	3.71E-13	3.57E-28	K04515:LOC113845138,CAMK2G|K05087:IGF1R,a00f0252-04ca-4c37-b932-f1fdc0be18f9|K02677:PRKCA|K01110:PTEN|K01116:PLCG1,LOC101792010|K02091:CDK6|K17454:E2F1|K04357:EGF|K04359:PDGFA|K17386:PDGFB|K06618:RB1|K02649:PIK3R5,PIK3R2,PIK3R1,LOC101795759|K02183:LOC101805317,CALM2,CALM1|K09389:29befb83-4d49-48c6-8da4-9559c88e094d,E2F2|K03099:SOS1,SOS2|K04503:CCND1|K04365:BRAF|K00922:PIK3CA,PIK3CB,PIK3CD,PIK3CG|…	https://www.kegg.jp/kegg-bin/show_pathway?ko05214/K04515%09red/K05087%09red/K02677%09red/K01110%09red/K01116%09red/K02091%09red/K17454%09red/K04357%09red/K04359%09red/K17386%09red/K06618%09red/K02649%09red/K02183%09red/K09389%09red/K03099%09red/K04503%09red/K04365%09red/K00922%09red/K05859%09red/K07827%09red/K05089%09red/K19662%09red/K06643%09red/K07203%09red/K04456%09red/K02833%09red/K17447%09re…
Tuberculosis	KEGG PATHWAY	ko05152	53	131	1.949292362	1.96E-07	2.62E-25	K04515:LOC113845138,CAMK2G|K14958:KSR1|K04513:RHOA|K04731:IRAK2|K11217:JAK1|K12794:CARD9|K10159:LOC110351185|K14957:LSP1|K07888:LOC113840038|K11220:STAT1|K02155:ATP6V0C|K12478:EEA1|K04398:CASP8|K04043:HSPA9|K08738:LOC113841161,CYC|K07887:RAB5A|K05398:LOC106020465|K04441:MAPK12,MAPK14|K04440:MAPK9,MAPK8|K04447:JAK2|K07369:MALT1|K05870:CREB1|K08061:RFX5|K05132:IFNGR1|K05133:IFNGR2|K05134:IL10RA|K06…	https://www.kegg.jp/kegg-bin/show_pathway?ko05152/K04515%09red/K14958%09red/K04513%09red/K04731%09red/K11217%09red/K12794%09red/K10159%09red/K14957%09red/K07888%09red/K11220%09red/K02155%09red/K12478%09red/K04398%09red/K04043%09red/K08738%09red/K07887%09red/K05398%09red/K04441%09red/K04440%09red/K04447%09red/K07369%09red/K05870%09red/K08061%09red/K05132%09red/K05133%09red/K05134%09red/K06268%09re…
Long-term potentiation	KEGG PATHWAY	ko04720	23	43	2.577103066	2.17E-06	6.64E-25	K04515:LOC113845138,CAMK2G|K02677:PRKCA|K07836:RAP1B|K04373:RPS6KA6,RPS6KA2,RPS6KA3|K06269:PPP1CB|K06268:PPP3R1|K02183:LOC101805317,CALM2,CALM1|K05197:GRIA1|K05210:GRIN2B|K05198:GRIA2|K05858:PLCB1,PLCB4,PLCB2|K04850:CACNA1C|K04345:PRKACB|K19662:PRKCB|K04366:RAF1|K04348:PPP3CA,PPP3CB|K04958:ITPR1|K04374:8ddd9e5e-2fd9-47f0-8e91-e094ab22b3c5|K04498:e4b3cdd1-b969-4726-ad39-6142bc1448a0,CREBBP,EP300|K…	https://www.kegg.jp/kegg-bin/show_pathway?ko04720/K04515%09red/K02677%09red/K07836%09red/K04373%09red/K06269%09red/K06268%09red/K02183%09red/K05197%09red/K05210%09red/K05198%09red/K05858%09red/K04850%09red/K04345%09red/K19662%09red/K04366%09red/K04348%09red/K04958%09red/K04374%09red/K04498%09red/K02833%09red/K07827%09red/K04634%09red/K04365%09red/
Retrograde endocannabinoid signaling	KEGG PATHWAY	ko04723	34	74	2.213704279	9.74E-07	2.84E-24	K04538:GNB4|K02677:PRKCA|K13985:NAPEPLD|K13806:DAGLA|K15291:RIMS1|K08042:ADCY2|K08047:ADCY7|K08045:ADCY5|K05175:GABRA3|K08049:ADCY9|K04441:MAPK12,MAPK14|K04440:MAPK9,MAPK8|K04536:GNB1|K05197:GRIA1|K04534:LOC101791437,LOC113844914|K05192:LOC101802647|K04997:KCNJ3|K04543:GNG7|K04277:CNR1,LOC113843136|K04546:LOC101794407|K05198:GRIA2|K05199:GRIA3|K05858:PLCB1,PLCB4,PLCB2|K04850:CACNA1C|K04345:PRKACB…	https://www.kegg.jp/kegg-bin/show_pathway?ko04723/K04538%09red/K02677%09red/K13985%09red/K13806%09red/K15291%09red/K08042%09red/K08047%09red/K08045%09red/K05175%09red/K08049%09red/K04441%09red/K04440%09red/K04536%09red/K05197%09red/K04534%09red/K05192%09red/K04997%09red/K04543%09red/K04277%09red/K04546%09red/K05198%09red/K05199%09red/K05858%09red/K04850%09red/K04345%09red/K04347%09red/K04857%09re…
Taste transduction	KEGG PATHWAY	ko04742	14	40	1.686321789	0.026041033	2.55E-23	K04850:CACNA1C|K04345:PRKACB|K04624:LOC113839734,LOC110354524|K01509:ENTPD2,LOC101790941|K05175:GABRA3|K04131:CHRM3|K04836:LOC101802370|K04834:LOC101802174|K04827:SCNN1G|K04916:KCNK5|K04270:P2RY1|K04153:HTR1B|K04607:GRM4|K13755:PDE1C,PDE1A	https://www.kegg.jp/kegg-bin/show_pathway?ko04742/K04850%09red/K04345%09red/K04624%09red/K01509%09red/K05175%09red/K04131%09red/K04836%09red/K04834%09red/K04827%09red/K04916%09red/K04270%09red/K04153%09red/K04607%09red/K13755%09red/
TGF-beta signaling pathway	KEGG PATHWAY	ko04350	43	69	3.002560535	6.77E-14	3.61E-21	K04514:ROCK1|K19559:LTBP1|K19558:LOC101802543|K04676:SMAD1|K04513:RHOA|K19553:TGIF2|K16857:THBS1|K13596:ACVR2B|K03868:RBX1|K04663:BMP5|K04662:BMP2,BMP4|K19631:SMAD7,LOC110352107|K04667:INHBA|K19383:TGIF1|K13578:BMPR1B|K04377:e9e98afd-35da-4c3b-b53e-531ca047a91b|K17694:ID3|K04686:PITX2|K17693:ID2|K04500:SMAD3,SMAD2|K04682:E2F4,E2F5|K04501:SMAD4|K04688:RPS6KB1|K20012:GDF6|K10162:BAMBI|K20013:GDF7|K…	https://www.kegg.jp/kegg-bin/show_pathway?ko04350/K04514%09red/K19559%09red/K19558%09red/K04676%09red/K04513%09red/K19553%09red/K16857%09red/K13596%09red/K03868%09red/K04663%09red/K04662%09red/K19631%09red/K04667%09red/K19383%09red/K13578%09red/K04377%09red/K17694%09red/K04686%09red/K17693%09red/K04500%09red/K04682%09red/K04501%09red/K04688%09red/K20012%09red/K10162%09red/K20013%09red/K04388%09re…
VEGF signaling pathway	KEGG PATHWAY	ko04370	25	39	3.088501444	5.30E-09	4.30E-21	K02677:PRKCA|K01116:PLCG1,LOC101792010|K05098:KDR|K05448:VEGFA|K04443:MAPKAPK2|K16342:PLA2G4B|K04441:MAPK12,MAPK14|K07861:RAC3|K06268:PPP3R1|K02649:PIK3R5,PIK3R2,PIK3R1,LOC101795759|K04444:MAPKAPK3|K00922:PIK3CA,PIK3CB,PIK3CD,PIK3CG|K05859:PLCG2|K05725:PTK2|K19662:PRKCB|K04348:PPP3CA,PPP3CB|K05704:SRC|K04455:HSPB1|K04456:AKT3,AKT1|K02833:HRAS|K17447:SHC2|K17332:NFATC2|K07827:KRAS|K04366:RAF1|K057…	https://www.kegg.jp/kegg-bin/show_pathway?ko04370/K02677%09red/K01116%09red/K05098%09red/K05448%09red/K04443%09red/K16342%09red/K04441%09red/K07861%09red/K06268%09red/K02649%09red/K04444%09red/K00922%09red/K05859%09red/K05725%09red/K19662%09red/K04348%09red/K05704%09red/K04455%09red/K04456%09red/K02833%09red/K17447%09red/K17332%09red/K07827%09red/K04366%09red/K05760%09red/
Sphingolipid metabolism	KEGG PATHWAY	ko00600	16	41	1.880219416	0.005666383	7.32E-21	K01019:GAL3ST1|K12350:SMPD1|K12351:SMPD2|K00654:SPTLC2|K00720:UGCG|K12357:NEU4,NEU2,NEU3|K01134:ARSA|K04712:DEGS1|K04710:LOC101790332,CERS1,CERS2,CERS5,CERS6|K04716:SGPP1|K04715:CERK|K04714:SGMS2,SGMS1|K01080:PLPP3|K01634:SGPL1|K04708:KDSR|K12348:ASAH1	https://www.kegg.jp/kegg-bin/show_pathway?ko00600/K01019%09red/K12350%09red/K12351%09red/K00654%09red/K00720%09red/K12357%09red/K01134%09red/K04712%09red/K04710%09red/K04716%09red/K04715%09red/K04714%09red/K01080%09red/K01634%09red/K04708%09red/K12348%09red/
cGMP-PKG signaling pathway	KEGG PATHWAY	ko04022	66	117	2.717881271	2.17E-17	9.20E-21	K12755:MYL9|K04513:RHOA|K04514:ROCK1|K04137:ADRA1D|K05870:CREB1|K18050:PRKCE,5ad0a8fe-8aee-43af-8b2a-d5840b109e92|K03121:GTF2IRD1,GTF2I|K19021:PDE3A|K18154:RGS2|K17388:ROCK2|K08042:ADCY2|K08047:ADCY7|K08045:ADCY5|K01540:ATP1B3,ATP1B1|K13296:e6ab3f9e-964b-4bae-86fb-10b89616bc6e,PDE3B|K08049:ADCY9|K05001:KCNJ8|K05863:SLC25A6,SLC25A4|K07376:PRKG1,fda8dece-820b-46c6-a570-bf8ffaebfbcd|K04378:SRF|K1232…	https://www.kegg.jp/kegg-bin/show_pathway?ko04022/K12755%09red/K04513%09red/K04514%09red/K04137%09red/K05870%09red/K18050%09red/K03121%09red/K19021%09red/K18154%09red/K17388%09red/K08042%09red/K08047%09red/K08045%09red/K01540%09red/K13296%09red/K08049%09red/K05001%09red/K05863%09red/K07376%09red/K04378%09red/K12324%09red/K04140%09red/K04142%09red/K06268%09red/K02649%09red/K02183%09red/K04850%09re…
Thyroid hormone signaling pathway	KEGG PATHWAY	ko04919	56	84	3.212041502	9.91E-20	2.06E-20	K17901:RCAN1|K02105:CTNNB1|K02677:PRKCA|K01116:PLCG1,LOC101792010|K03083:GSK3B|K11255:NCOA2|K06067:HDAC2|K15159:MED16|K02599:NOTCH1,3f50d37a-8ae7-4dd6-bf24-eb637056bec5,NOTCH2,bc350cc2-5988-4ae1-944d-1db3e93c8ced|K08524:RXRA,c1d0c671-20aa-4705-8c5b-b54c1ca490b3|K05704:SRC|K08187:SLC16A10|K06487:ITGAV|K00408:WNT4|K15133:MED17|K02833:HRAS|K07299:SLC2A1|K07754:DIO3|K04345:PRKACB|K05858:PLCB1,PLCB4,P…	https://www.kegg.jp/kegg-bin/show_pathway?ko04919/K17901%09red/K02105%09red/K02677%09red/K01116%09red/K03083%09red/K11255%09red/K06067%09red/K15159%09red/K02599%09red/K08524%09red/K05704%09red/K08187%09red/K06487%09red/K00408%09red/K15133%09red/K02833%09red/K07299%09red/K07754%09red/K04345%09red/K05858%09red/K02649%09red/K09101%09red/K06643%09red/K11256%09red/K04503%09red/K05860%09red/K01539%09re…
Arrhythmogenic right ventricular cardiomyopathy (ARVC)	KEGG PATHWAY	ko05412	28	65	2.075472971	3.81E-05	5.46E-20	K10056:JUP|K06736:CDH2|K04861:CACNA2D4|K05719:ITGB1|K04863:CACNB2|K07372:GJA1|K04869:CACNG4|K06480:ITGA1|K06265:DAG1|K02620:TCF7|K06591:ITGB8|K10366:DMD|K05699:ACTN2,ACTN1|K02105:CTNNB1|K05691:CTNNA1,CTNNA2,CTNNA3|K05692:ACTB|K10381:d153bb0c-43d4-4995-8819-c5f945c42983,DSP|K12641:LMNA|K04850:CACNA1C|K04857:CACNA1S|K04859:LOC101799806|K12566:SGCB|K06585:ITGA9|K04490:TCF7L1|K04491:TCF7L2|K04492:LEF…	https://www.kegg.jp/kegg-bin/show_pathway?ko05412/K10056%09red/K06736%09red/K04861%09red/K05719%09red/K04863%09red/K07372%09red/K04869%09red/K06480%09red/K06265%09red/K02620%09red/K06591%09red/K10366%09red/K05699%09red/K02105%09red/K05691%09red/K05692%09red/K10381%09red/K12641%09red/K04850%09red/K04857%09red/K04859%09red/K12566%09red/K06585%09red/K04490%09red/K04491%09red/K04492%09red/K06588%09re…
MAPK signaling pathway - fly	KEGG PATHWAY	ko04013	40	84	2.294315359	3.19E-08	6.64E-19	K16197:YWHAB,YWHAZ,YWHAQ|K02678:ETS1,ETS2|K04417:MAP3K9|K03211:ETV6|K04404:TAB2|K10176:TBX2,e7a17cf5-82e9-482d-93ea-08d59fe9b93d|K04352:LOC101791380|K06689:UBE2D3,UBE2D1|K04430:MAP2K4|K20210:LOC113841850,RREB1,daf85051-d5be-4dd5-9f2d-f3973fe57f31|K04662:BMP2,BMP4|K17383:SPRY2|K20216:DUSP10|K05759:PFN2|K04441:MAPK12,MAPK14|K04440:MAPK9,MAPK8|K13578:BMPR1B|K04448:JUN|K07293:LOC101789439|K04506:SIAH…	https://www.kegg.jp/kegg-bin/show_pathway?ko04013/K16197%09red/K02678%09red/K04417%09red/K03211%09red/K04404%09red/K10176%09red/K04352%09red/K06689%09red/K04430%09red/K20210%09red/K04662%09red/K17383%09red/K20216%09red/K05759%09red/K04441%09red/K04440%09red/K13578%09red/K04448%09red/K07293%09red/K04506%09red/K04427%09red/K12380%09red/K03099%09red/K04365%09red/K04461%09red/K17536%09red/K08840%09re…
cAMP signaling pathway	KEGG PATHWAY	ko04024	64	146	2.112027289	2.16E-10	1.05E-18	K04515:LOC113845138,CAMK2G|K12755:MYL9|K04513:RHOA|K04514:ROCK1|K07861:RAC3|K04734:NFKBIA|K04456:AKT3,AKT1|K01115:PLD1,e52d0119-c13a-4e50-baa5-40ad0b36e494|K04448:JUN|K17388:ROCK2|K08042:ADCY2|K05730:VAV2,VAV3|K05731:TIAM1|K08047:ADCY7|K08045:ADCY5|K05840:DRD5|K08049:ADCY9|K13293:PDE4C,PDE4D,PDE4B|K05860:PLCE1|K04949:FATE1|K04440:MAPK9,MAPK8|K04446:NFATC1|K07294:PPARA|K04142:LOC101800857|K07836:R…	https://www.kegg.jp/kegg-bin/show_pathway?ko04024/K04515%09red/K12755%09red/K04513%09red/K04514%09red/K07861%09red/K04734%09red/K04456%09red/K01115%09red/K04448%09red/K17388%09red/K08042%09red/K05730%09red/K05731%09red/K08047%09red/K08045%09red/K05840%09red/K08049%09red/K13293%09red/K05860%09red/K04949%09red/K04440%09red/K04446%09red/K07294%09red/K04142%09red/K07836%09red/K02649%09red/K02183%09re…
Glycosphingolipid biosynthesis - ganglio series	KEGG PATHWAY	ko00604	7	14	2.409031127	0.014190697	1.67E-18	K00780:ST3GAL1|K03368:ST3GAL2|K03375:ST6GALNAC5|K03370:ST3GAL5|K03371:ST8SIA1|K03372:SLC33A1|K03373:ST6GALNAC3	https://www.kegg.jp/kegg-bin/show_pathway?ko00604/K00780%09red/K03368%09red/K03375%09red/K03370%09red/K03371%09red/K03372%09red/K03373%09red/
Hippo signaling pathway -multiple species	KEGG PATHWAY	ko04392	13	25	2.505392372	0.000531228	1.63E-17	K09448:TEAD3,TEAD1|K04412:STK3|K09850:RASSF1|K08791:LATS2,3e6cb00b-71cd-4489-9df1-e8d01ebfd0c2,LATS1|K16682:WTIP,LIMD1|K16686:SAV1|K16687:YAP1|K16684:NF2,LOC101791895|K16685:WWC1|K16822:FRMD6|K16669:FAT4|K16820:WWTR1|K16507:DCHS1,DCHS2	https://www.kegg.jp/kegg-bin/show_pathway?ko04392/K09448%09red/K04412%09red/K09850%09red/K08791%09red/K16682%09red/K16686%09red/K16687%09red/K16684%09red/K16685%09red/K16822%09red/K16669%09red/K16820%09red/K16507%09red/
Synaptic vesicle cycle	KEGG PATHWAY	ko04721	16	40	1.927224901	0.004262353	3.99E-17	K11825:AP2B1|K04644:LOC101793731|K11824:AP2A2|K04645:LOC113839618|K08486:STX2|K04646:CLTCL1|K02150:ATP6V1E1|K15291:RIMS1|K04560:STX1A|K02146:ATP6V0D1|K15294:CPLX2,CPLX1|K11826:AP2M1|K02155:ATP6V0C|K15293:LOC101804257|K02152:ATP6V1G1|K01528:DNM1	https://www.kegg.jp/kegg-bin/show_pathway?ko04721/K11825%09red/K04644%09red/K11824%09red/K04645%09red/K08486%09red/K04646%09red/K02150%09red/K15291%09red/K04560%09red/K02146%09red/K15294%09red/K11826%09red/K02155%09red/K15293%09red/K02152%09red/K01528%09red/
Proteasome	KEGG PATHWAY	ko03050	18	48	1.806773345	0.005640191	9.39E-17	K03064:PSMC6|K03065:PSMC3|K03066:PSMC5|K03061:PSMC2|K03062:PSMC1|K06698:PSME3|K02731:PSMA7|K03037:PSMD6|K06699:PSME4|K02728:PSMA4|K03039:PSMD13|K03038:PSMD7|K03028:PSMD2|K03035:PSMD12|K03030:PSMD14|K03032:PSMD1|K02735:PSMB3|K02734:PSMB2	https://www.kegg.jp/kegg-bin/show_pathway?ko03050/K03064%09red/K03065%09red/K03066%09red/K03061%09red/K03062%09red/K06698%09red/K02731%09red/K03037%09red/K06699%09red/K02728%09red/K03039%09red/K03038%09red/K03028%09red/K03035%09red/K03030%09red/K03032%09red/K02735%09red/K02734%09red/
Non-alcoholic fatty liver disease (NAFLD)	KEGG PATHWAY	ko04932	49	124	1.903911697	1.28E-06	2.80E-16	K09113:MLXIP|K02256:COX1|K05062:LEPR|K03083:GSK3B|K08852:ERN1|K07198:PRKAA1|K07199:PRKAB1,PRKAB2|K04390:FAS|K08524:RXRA,c1d0c671-20aa-4705-8c5b-b54c1ca490b3|K04448:JUN|K02270:LOC101796089|K04398:CASP8|K03961:NDUFB5|K03965:LOC101800441|K03967:NDUFC1|K03966:NDUFB10|K08738:LOC113841161,CYC|K16341:BCL2L11|K04440:MAPK9,MAPK8|K07297:ADIPOR1|K02187:CASP3|K04374:8ddd9e5e-2fd9-47f0-8e91-e094ab22b3c5|K0264…	https://www.kegg.jp/kegg-bin/show_pathway?ko04932/K09113%09red/K02256%09red/K05062%09red/K03083%09red/K08852%09red/K07198%09red/K07199%09red/K04390%09red/K08524%09red/K04448%09red/K02270%09red/K04398%09red/K03961%09red/K03965%09red/K03967%09red/K03966%09red/K08738%09red/K16341%09red/K04440%09red/K07297%09red/K02187%09red/K04374%09red/K02649%09red/K08860%09red/K04527%09red/K03158%09red/K00922%09re…
Bacterial invasion of epithelial cells	KEGG PATHWAY	ko05100	41	73	2.706034964	3.10E-11	5.74E-16	K13736:ARHGAP10|K04513:RHOA|K07863:RHOG|K04438:CRKL,CRK|K05748:WASF2|K09593:f2353433-db72-4b08-9ec7-bf376c50e502,GAB1|K05099:MET|K04645:LOC113839618|K04644:LOC101793731|K04646:CLTCL1|K16942:SEPT2|K06106:LOC101793940,CTTN|K05758:ARPC2|K04707:a9896c52-0482-44eb-b8bb-298e5bb6d323,CBLB|K17447:SHC2|K05753:WASF1|K05754:ARPC5L,ARPC5|K13738:CD2AP|K02649:PIK3R5,PIK3R2,PIK3R1,LOC101795759|K02105:CTNNB1|K12…	https://www.kegg.jp/kegg-bin/show_pathway?ko05100/K13736%09red/K04513%09red/K07863%09red/K04438%09red/K05748%09red/K09593%09red/K05099%09red/K04645%09red/K04644%09red/K04646%09red/K16942%09red/K06106%09red/K05758%09red/K04707%09red/K17447%09red/K05753%09red/K05754%09red/K13738%09red/K02649%09red/K02105%09red/K12366%09red/K05691%09red/K05692%09red/K00922%09red/K13744%09red/K05719%09red/K05747%09re…
Hedgehog signaling pathway	KEGG PATHWAY	ko04340	27	36	3.61354669	4.17E-12	1.97E-15	K10151:CCND2|K08957:CSNK1A1|K08959:CSNK1D|K08958:CSNK1G1,CSNK1G2,CSNK1G3|K03083:GSK3B|K10394:KIF3A|K00910:GRK2|K08439:GPR161|K03869:CUL3|K20020:BOC|K06229:SUFU|K10523:SPOP|K06225:PTCH1|K06226:SMO|K18806:KIF7|K04503:CCND1|K19605:EVC|K02161:BCL2|K19608:EVC2|K04345:PRKACB|K04678:SMURF1,SMURF2|K16797:GLI1|K03347:CUL1|K06232:ca21398b-38d5-414c-9269-8595fa271a43|K03362:FBXW11,BTRC|K06230:GLI3|K16798:GL…	https://www.kegg.jp/kegg-bin/show_pathway?ko04340/K10151%09red/K08957%09red/K08959%09red/K08958%09red/K03083%09red/K10394%09red/K00910%09red/K08439%09red/K03869%09red/K20020%09red/K06229%09red/K10523%09red/K06225%09red/K06226%09red/K18806%09red/K04503%09red/K19605%09red/K02161%09red/K19608%09red/K04345%09red/K04678%09red/K16797%09red/K03347%09red/K06232%09red/K03362%09red/K06230%09red/K16798%09re…
Cell adhesion molecules (CAMs)	KEGG PATHWAY	ko04514	39	99	1.898024524	1.64E-05	2.03E-15	K16336:SDC2|K16337:SDC3|K06785:JAM3|K06787:LOC101801460|K16338:SDC4|K03160:CD40|K07378:NLGN1,LOC101799484,NLGN4X|K06736:CDH2|K06533:CDH5|K05719:ITGB1|K06757:NFASC|K06759:CNTN1|K06487:ITGAV|K06781:CADM1|K06775:NEGR1|K07377:NRXN3|K06592:NECTIN3|K06591:ITGB8|K06081:NECTIN1|K06087:CLDN5|K07522:NTNG1|K06797:CDH4|K06793:VCAN,bb71e450-88f8-4ae3-80e1-95291c414ca9|K05695:PTPRF|K05693:PTPRM|K06816:GLG1|K06…	https://www.kegg.jp/kegg-bin/show_pathway?ko04514/K16336%09red/K16337%09red/K06785%09red/K06787%09red/K16338%09red/K03160%09red/K07378%09red/K06736%09red/K06533%09red/K05719%09red/K06757%09red/K06759%09red/K06487%09red/K06781%09red/K06775%09red/K07377%09red/K06592%09red/K06591%09red/K06081%09red/K06087%09red/K07522%09red/K06797%09red/K06793%09red/K05695%09red/K05693%09red/K06816%09red/K06474%09re…
Salmonella infection	KEGG PATHWAY	ko05132	28	82	1.645191989	0.003259205	2.97E-15	K04437:FLNB,LOC113841470|K04514:ROCK1|K07863:RHOG|K04448:JUN|K17388:ROCK2|K05758:ARPC2|K05759:PFN2|K04441:MAPK12,MAPK14|K04440:MAPK9,MAPK8|K10407:KLC4,KLC1|K05132:IFNGR1|K05753:WASF1|K05754:ARPC5L,ARPC5|K05692:ACTB|K01370:LOC101789899|K10160:TLR4|K07897:RAB7A|K05747:WASL|K05133:IFNGR2|K06071:PKN3,PKN2|K05701:TJP1|K05748:WASF2|K10413:DYNC1H1|K10415:DYNC1I1,DYNC1I2|K10414:DYNC2H1|K10416:DYNC1LI2,DY…	https://www.kegg.jp/kegg-bin/show_pathway?ko05132/K04437%09red/K04514%09red/K07863%09red/K04448%09red/K17388%09red/K05758%09red/K05759%09red/K04441%09red/K04440%09red/K10407%09red/K05132%09red/K05753%09red/K05754%09red/K05692%09red/K01370%09red/K10160%09red/K07897%09red/K05747%09red/K05133%09red/K06071%09red/K05701%09red/K05748%09red/K10413%09red/K10415%09red/K10414%09red/K10416%09red/K02580%09re…
Vibrio cholerae infection	KEGG PATHWAY	ko05110	18	48	1.806773345	0.005640191	4.23E-15	K04345:PRKACB|K10949:KDELR3|K05031:CFTR|K02677:PRKCA|K05701:TJP1|K05692:ACTB|K01116:PLCG1,LOC101792010|K10951:SLC12A2|K02152:ATP6V1G1|K04632:GNAS|K06098:TJP2|K02146:ATP6V0D1|K02150:ATP6V1E1|K02155:ATP6V0C|K08049:ADCY9|K10956:SEC61A1|K05859:PLCG2|K09582:PDIA4	https://www.kegg.jp/kegg-bin/show_pathway?ko05110/K04345%09red/K10949%09red/K05031%09red/K02677%09red/K05701%09red/K05692%09red/K01116%09red/K10951%09red/K02152%09red/K04632%09red/K06098%09red/K02146%09red/K02150%09red/K02155%09red/K08049%09red/K10956%09red/K05859%09red/K09582%09red/
Ubiquitin mediated proteolysis	KEGG PATHWAY	ko04120	80	125	3.083559842	7.60E-26	2.25E-14	K10594:HERC1|K10595:f54760f5-467e-4336-b50e-ef0061d58b3b,HERC2|K04694:SOCS1|K10597:UBE4B|K10590:f7d4f5c3-bb75-48d1-adff-9fe527debf34,TRIP12|K10591:NEDD4|K04416:MAP3K1|K10593:UBR5|K10576:UBE2H|K10609:CUL4B,CUL4A|K04552:UBE2L3|K04555:UBE2G2|K10573:UBE2A|K10598:PPIL2|K10571:DET1|K02207:CDC34,UBE2R2,LOC101790213|K10140:DDB2|K10699:UBA6|K12456:ANAPC13|K10054:LOC101796105,PML|K10605:BRCA1|K06689:UBE2D3…	https://www.kegg.jp/kegg-bin/show_pathway?ko04120/K10594%09red/K10595%09red/K04694%09red/K10597%09red/K10590%09red/K10591%09red/K04416%09red/K10593%09red/K10576%09red/K10609%09red/K04552%09red/K04555%09red/K10573%09red/K10598%09red/K10571%09red/K02207%09red/K10140%09red/K10699%09red/K12456%09red/K10054%09red/K10605%09red/K06689%09red/K03869%09red/K07868%09red/K05633%09red/K13305%09red/K05630%09re…
mTOR signaling pathway	KEGG PATHWAY	ko04150	71	113	3.027278053	2.20E-22	1.37E-13	K20401:FNIP2|K20400:FNIP1|K20403:TTI1|K07203:MTOR|K00182:WNT2|K20404:DEPDC5|K04513:RHOA|K01384:WNT11|K20409:WDR59|K02677:PRKCA|K01110:PTEN|K03068:LRP6,LRP5|K03083:GSK3B|K08269:ULK1,ULK2|K02235:FZD2|K07198:PRKAA1|K07206:TSC1,291c26de-4c22-4c69-9871-df999025fc37|K20064:GRB10|K09594:FLCN|K08267:RICTOR|K02354:FZD4|K02376:FZD6|K02375:FZD8,3721d97d-4d42-486a-8ab2-82b764f0bffd,FZD5|K02353:DVL3,DVL1|K157…	https://www.kegg.jp/kegg-bin/show_pathway?ko04150/K20401%09red/K20400%09red/K20403%09red/K07203%09red/K00182%09red/K20404%09red/K04513%09red/K01384%09red/K20409%09red/K02677%09red/K01110%09red/K03068%09red/K03083%09red/K08269%09red/K02235%09red/K07198%09red/K07206%09red/K20064%09red/K09594%09red/K08267%09red/K02354%09red/K02376%09red/K02375%09red/K02353%09red/K15705%09red/K00408%09red/K13302%09re…
TNF signaling pathway	KEGG PATHWAY	ko04668	37	87	2.049060958	3.31E-06	1.53E-13	K02373:FADD|K04430:MAP2K4|K12793:TAB3|K04734:NFKBIA|K04390:FAS|K04398:CASP8|K09558:BAG4|K04400:LOC101799731|K09849:TRAF5|K05173:IL18R1|K05508:CX3CL1|K04441:MAPK12,MAPK14|K04440:MAPK9,MAPK8|K04445:RPS6KA5|K02187:CASP3|K04374:8ddd9e5e-2fd9-47f0-8e91-e094ab22b3c5|K02649:PIK3R5,PIK3R2,PIK3R1,LOC101795759|K04427:LOC101800996|K04404:TAB2|K09048:CREB3,CREB3L2,CREB3L1|K16060:BIRC2|K09047:CREB5|K03158:LOC…	https://www.kegg.jp/kegg-bin/show_pathway?ko04668/K02373%09red/K04430%09red/K12793%09red/K04734%09red/K04390%09red/K04398%09red/K09558%09red/K04400%09red/K09849%09red/K05173%09red/K05508%09red/K04441%09red/K04440%09red/K04445%09red/K02187%09red/K04374%09red/K02649%09red/K04427%09red/K04404%09red/K09048%09red/K16060%09red/K09047%09red/K03158%09red/K02861%09red/K04466%09red/K00922%09red/K03173%09re…
Cardiac muscle contraction	KEGG PATHWAY	ko04260	23	60	1.846923864	0.001334094	2.52E-13	K02256:COX1|K12750:MYL4|K02270:LOC101796089|K04861:CACNA2D4|K04863:CACNB2|K01540:ATP1B3,ATP1B1|K05865:TNNC1|K04869:CACNG4|K01539:ATP1A1|K12749:MYL3|K17751:MYH7B|K02261:COX2|K02262:COX3|K02266:LOC101790617|K04850:CACNA1C|K00416:LOC101793235|K00417:LOC101803858|K05742:SLC9A1|K00412:CYTB|K04857:CACNA1S|K04859:LOC101799806|K12045:TNNT2|K10351:LOC101803605	https://www.kegg.jp/kegg-bin/show_pathway?ko04260/K02256%09red/K12750%09red/K02270%09red/K04861%09red/K04863%09red/K01540%09red/K05865%09red/K04869%09red/K01539%09red/K12749%09red/K17751%09red/K02261%09red/K02262%09red/K02266%09red/K04850%09red/K00416%09red/K00417%09red/K05742%09red/K00412%09red/K04857%09red/K04859%09red/K12045%09red/K10351%09red/
Longevity regulating pathway - multiple species	KEGG PATHWAY	ko04213	27	58	2.242891049	9.29E-06	1.64E-12	K05087:IGF1R,a00f0252-04ca-4c37-b932-f1fdc0be18f9|K11411:SIRT1|K06067:HDAC2|K07198:PRKAA1|K07199:PRKAB1,PRKAB2|K08042:ADCY2|K08047:ADCY7|K08045:ADCY5|K08049:ADCY9|K04565:SOD1|K02649:PIK3R5,PIK3R2,PIK3R1,LOC101795759|K04527:INSR|K04688:RPS6KB1|K00922:PIK3CA,PIK3CB,PIK3CD,PIK3CG|K07187:IRS4,IRS2|K04345:PRKACB|K03695:CLPB|K07200:PRKAG2|K07201:FOXO1|K07203:MTOR|K16172:IRS1|K08339:ATG5|K04456:AKT3,AKT…	https://www.kegg.jp/kegg-bin/show_pathway?ko04213/K05087%09red/K11411%09red/K06067%09red/K07198%09red/K07199%09red/K08042%09red/K08047%09red/K08045%09red/K08049%09red/K04565%09red/K02649%09red/K04527%09red/K04688%09red/K00922%09red/K07187%09red/K04345%09red/K03695%09red/K07200%09red/K07201%09red/K07203%09red/K16172%09red/K08339%09red/K04456%09red/K02833%09red/K09408%09red/K07827%09red/K03283%09re…
Cytosolic DNA-sensing pathway	KEGG PATHWAY	ko04623	18	51	1.70049256	0.011440774	1.64E-12	K07209:IKBKB|K02861:RIPK1|K17834:CGAS|K12646:DDX58|K04734:NFKBIA|K01370:LOC101789899|K03009:POLR2K|K03014:POLR2F|K03022:POLR3H|K03024:POLR3G|K03025:POLR3F|K03026:POLR3D|K03027:POLR1C|K02580:NFKB1|K05410:TBK1|K03019:POLR3K|K14721:POLR3E|K12968:ADAR	https://www.kegg.jp/kegg-bin/show_pathway?ko04623/K07209%09red/K02861%09red/K17834%09red/K12646%09red/K04734%09red/K01370%09red/K03009%09red/K03014%09red/K03022%09red/K03024%09red/K03025%09red/K03026%09red/K03027%09red/K02580%09red/K05410%09red/K03019%09red/K14721%09red/K12968%09red/
Glutathione metabolism	KEGG PATHWAY	ko00480	14	40	1.686321789	0.026041033	1.65E-12	K11204:GCLC|K10808:RRM2B,RRM2|K05360:TXNDC12|K00802:SMS|K11140:ANPEP|K00432:GPX7|K04097:HPGDS|K00799:LOC113839739,LOC101796851,LOC101797138,LOC101798048|K00797:SRM|K10807:RRM1|K11205:GCLM|K01920:GSS|K00033:PGD|K00031:IDH2,IDH1	https://www.kegg.jp/kegg-bin/show_pathway?ko00480/K11204%09red/K10808%09red/K05360%09red/K00802%09red/K11140%09red/K00432%09red/K04097%09red/K00799%09red/K00797%09red/K10807%09red/K11205%09red/K01920%09red/K00033%09red/K00031%09red/
Glycosaminoglycan biosynthesis - keratan sulfate	KEGG PATHWAY	ko00533	10	14	3.441473038	6.37E-05	2.10E-12	K00717:FUT8|K07969:B4GALT4|K04745:CHST2|K07966:B4GALT1|K00780:ST3GAL1|K00781:ST3GAL3|K03368:ST3GAL2|K09664:B3GNT7|K09671:LOC101804775|K00741:B3GNT2	https://www.kegg.jp/kegg-bin/show_pathway?ko00533/K00717%09red/K07969%09red/K04745%09red/K07966%09red/K00780%09red/K00781%09red/K03368%09red/K09664%09red/K09671%09red/K00741%09red/
Oocyte meiosis	KEGG PATHWAY	ko04114	38	76	2.409031127	1.31E-08	2.18E-12	K04515:LOC113845138,CAMK2G|K16197:YWHAB,YWHAZ,YWHAQ|K05087:IGF1R,a00f0252-04ca-4c37-b932-f1fdc0be18f9|K16198:YWHAH,YWHAG|K08836:SLK|K12456:ANAPC13|K11481:AURKA|K08042:ADCY2|K08047:ADCY7|K08045:ADCY5|K05867:LOC106017999|K08049:ADCY9|K03350:CDC27|K03351:ANAPC4|K03354:ANAPC7|K03355:CDC23|K11580:SGO1|K02602:CPEB4,CPEB2,CPEB3|K04373:RPS6KA6,RPS6KA2,RPS6KA3|K03359:CDC26|K11584:PPP2R5A,PPP2R5D,PPP2R5E,P…	https://www.kegg.jp/kegg-bin/show_pathway?ko04114/K04515%09red/K16197%09red/K05087%09red/K16198%09red/K08836%09red/K12456%09red/K11481%09red/K08042%09red/K08047%09red/K08045%09red/K05867%09red/K08049%09red/K03350%09red/K03351%09red/K03354%09red/K03355%09red/K11580%09red/K02602%09red/K04373%09red/K03359%09red/K11584%09red/K06268%09red/K06630%09red/K02183%09red/K03363%09red/K10292%09red/K03868%09re…
Viral carcinogenesis	KEGG PATHWAY	ko05203	75	134	2.696676634	2.60E-19	3.41E-12	K15979:SND1|K16197:YWHAB,YWHAZ,YWHAQ|K11418:HDAC11|K04692:STAT3|K02216:CHEK1|K04513:RHOA|K03142:GTF2H2|K05699:ACTN2,ACTN1|K04734:NFKBIA|K16198:YWHAH,YWHAG|K05870:CREB1|K09048:CREB3,CREB3L2,CREB3L1|K06063:SNW1|K06067:HDAC2|K03123:GTF2A2|K02091:CDK6|K00873:PKM|K03141:GTF2H1|K10151:CCND2|K06618:RB1|K03062:PSMC1|K10691:UBR4|K09849:TRAF5|K04443:MAPKAPK2|K04378:SRF|K03174:TRAF3|K06638:MAD1L1|K11838:USP…	https://www.kegg.jp/kegg-bin/show_pathway?ko05203/K15979%09red/K16197%09red/K11418%09red/K04692%09red/K02216%09red/K04513%09red/K03142%09red/K05699%09red/K04734%09red/K16198%09red/K05870%09red/K09048%09red/K06063%09red/K06067%09red/K03123%09red/K02091%09red/K00873%09red/K03141%09red/K10151%09red/K06618%09red/K03062%09red/K10691%09red/K09849%09red/K04443%09red/K04378%09red/K03174%09red/K06638%09re…
Platinum drug resistance	KEGG PATHWAY	ko01524	24	45	2.569633202	1.40E-06	4.18E-12	K02373:FADD|K17686:ATP7A,d24d5566-c510-49f6-a160-7f459217dd7c|K10605:BRCA1|K04390:FAS|K02350:REV3L|K03164:TOP2A,TOP2B|K04398:CASP8|K08735:MSH2|K08737:MSH6|K08738:LOC113841161,CYC|K02187:CASP3|K02649:PIK3R5,PIK3R2,PIK3R1,LOC101795759|K04728:ATM|K16060:BIRC2|K04725:XIAP|K00922:PIK3CA,PIK3CB,PIK3CD,PIK3CG|K02161:BCL2|K10847:XPA|K06643:MDM2|K03509:POLH|K04570:BCL2L1|K00799:LOC113839739,LOC101796851,L…	https://www.kegg.jp/kegg-bin/show_pathway?ko01524/K02373%09red/K17686%09red/K10605%09red/K04390%09red/K02350%09red/K03164%09red/K04398%09red/K08735%09red/K08737%09red/K08738%09red/K02187%09red/K02649%09red/K04728%09red/K16060%09red/K04725%09red/K00922%09red/K02161%09red/K10847%09red/K06643%09red/K03509%09red/K04570%09red/K00799%09red/K04456%09red/K14686%09red/
Sphingolipid signaling pathway	KEGG PATHWAY	ko04071	47	78	2.903191358	2.92E-14	7.28E-12	K04514:ROCK1|K04513:RHOA|K12350:SMPD1|K02677:PRKCA|K01110:PTEN|K01115:PLD1,e52d0119-c13a-4e50-baa5-40ad0b36e494|K04293:S1PR4|K04290:b6f6e9d6-bada-4679-ba46-2b185f38fc51|K04288:S1PR1|K17388:ROCK2|K04712:DEGS1|K04354:PPP2R2B,PPP2R2C|K18050:PRKCE,5ad0a8fe-8aee-43af-8b2a-d5840b109e92|K04441:MAPK12,MAPK14|K04440:MAPK9,MAPK8|K01634:SGPL1|K07861:RAC3|K11583:PPP2R3A,PPP2R3B|K11584:PPP2R5A,PPP2R5D,PPP2R5E…	https://www.kegg.jp/kegg-bin/show_pathway?ko04071/K04514%09red/K04513%09red/K12350%09red/K02677%09red/K01110%09red/K01115%09red/K04293%09red/K04290%09red/K04288%09red/K17388%09red/K04712%09red/K04354%09red/K18050%09red/K04441%09red/K04440%09red/K01634%09red/K07861%09red/K11583%09red/K11584%09red/K02649%09red/K12348%09red/K12351%09red/K04714%09red/K03158%09red/K02580%09red/K00922%09red/K02161%09re…
Serotonergic synapse	KEGG PATHWAY	ko04726	34	84	1.950168055	2.90E-05	7.28E-12	K04538:GNB4|K02677:PRKCA|K04534:LOC101791437,LOC113844914|K04964:TRPC1|K04943:KCNN2,ee217de9-8b42-49b8-9d9c-cbdcd6797f5c|K08045:ADCY5|K16342:PLA2G4B|K04536:GNB1|K02187:CASP3|K04520:APP|K04850:CACNA1C|K04997:KCNJ3|K04543:GNG7|K04546:LOC101794407|K04892:KCND2|K04347:GNG12|K07826:GNG2|K05858:PLCB1,PLCB4,PLCB2|K00274:LOC101793000|K04345:PRKACB|K04163:HTR7|K19662:PRKCB|K04366:RAF1|K04857:CACNA1S|K0495…	https://www.kegg.jp/kegg-bin/show_pathway?ko04726/K04538%09red/K02677%09red/K04534%09red/K04964%09red/K04943%09red/K08045%09red/K16342%09red/K04536%09red/K02187%09red/K04520%09red/K04850%09red/K04997%09red/K04543%09red/K04546%09red/K04892%09red/K04347%09red/K07826%09red/K05858%09red/K00274%09red/K04345%09red/K04163%09red/K19662%09red/K04366%09red/K04857%09red/K04958%09red/K02833%09red/K05000%09re…
Glycosaminoglycan biosynthesis - chondroitin sulfate / dermatan sulfate	KEGG PATHWAY	ko00532	14	18	3.747381753	3.47E-07	7.69E-12	K08106:CHST15|K04742:8ae066b4-fde0-4674-9755-e143357eff6f,CHST12|K04743:CHST7|K01020:CHST3,fd184645-17ea-4022-a0cf-0bcf6027313f|K01017:CHST13|K00734:B3GALT6|K03193:UST|K01794:LOC113839627,DSE|K00733:B4GALT7|K00771:XYLT1,89d901f8-fb1e-459d-8f8f-8f6dea65ea0a|K08105:CHST14|K13499:CHSY1,06e48692-fd70-476f-a19e-c54676129b70,CHSY3|K03419:CHPF2|K00746:CSGALNACT1,CSGALNACT2	https://www.kegg.jp/kegg-bin/show_pathway?ko00532/K08106%09red/K04742%09red/K04743%09red/K01020%09red/K01017%09red/K00734%09red/K03193%09red/K01794%09red/K00733%09red/K00771%09red/K08105%09red/K13499%09red/K03419%09red/K00746%09red/
Viral myocarditis	KEGG PATHWAY	ko05416	15	38	1.901866679	0.006446326	1.07E-11	K08887:ABL2|K04503:CCND1|K05703:FYN|K07861:RAC3|K05692:ACTB|K08738:LOC113841161,CYC|K17751:MYH7B|K12566:SGCB|K06265:DAG1|K06619:ABL1|K03260:55e87077-d39f-4b52-bcaa-a5a86914f996,EIF4G1,EIF4G3,EIF4G2|K03160:CD40|K02187:CASP3|K10366:DMD|K04398:CASP8	https://www.kegg.jp/kegg-bin/show_pathway?ko05416/K08887%09red/K04503%09red/K05703%09red/K07861%09red/K05692%09red/K08738%09red/K17751%09red/K12566%09red/K06265%09red/K06619%09red/K03260%09red/K03160%09red/K02187%09red/K10366%09red/K04398%09red/
Basal cell carcinoma	KEGG PATHWAY	ko05217	31	42	3.556188806	2.16E-13	1.77E-11	K00182:WNT2|K02376:FZD6|K02375:FZD8,3721d97d-4d42-486a-8ab2-82b764f0bffd,FZD5|K01384:WNT11|K03083:GSK3B|K02235:FZD2|K02157:AXIN1|K02353:DVL3,DVL1|K02354:FZD4|K06228:STK36|K04662:BMP2,BMP4|K00408:WNT4|K06229:SUFU|K02620:TCF7|K02432:FZD1,FZD7|K01558:WNT16|K02842:FZD10,FZD9|K06225:PTCH1|K06226:SMO|K02105:CTNNB1|K01064:WNT9A|K02085:APC2,APC,94caf6ee-5bd3-4149-b3fb-b9adb3de19ca|K02329:FZD3|K04492:LEF1…	https://www.kegg.jp/kegg-bin/show_pathway?ko05217/K00182%09red/K02376%09red/K02375%09red/K01384%09red/K03083%09red/K02235%09red/K02157%09red/K02353%09red/K02354%09red/K06228%09red/K04662%09red/K00408%09red/K06229%09red/K02620%09red/K02432%09red/K01558%09red/K02842%09red/K06225%09red/K06226%09red/K02105%09red/K01064%09red/K02085%09red/K02329%09red/K04492%09red/K00444%09red/K04385%09red/K16797%09re…
Oxytocin signaling pathway	KEGG PATHWAY	ko04921	62	111	2.691169907	3.90E-16	2.46E-11	K04515:LOC113845138,CAMK2G|K12755:MYL9|K08045:ADCY5|K08794:CAMK1G,CAMK1D|K04513:RHOA|K04514:ROCK1|K02677:PRKCA|K04534:LOC101791437,LOC113844914|K07198:PRKAA1|K07199:PRKAB1,PRKAB2|K18154:RGS2|K04503:CCND1|K17388:ROCK2|K08042:ADCY2|K04963:RYR3|K08047:ADCY7|K04863:CACNB2|K07359:CAMKK2,CAMKK1|K08049:ADCY9|K04869:CACNG4|K16342:PLA2G4B|K12324:NPR2|K17901:RCAN1|K12329:PPP1R12B|K12318:GUCY1A2,GUCY1A1|K04…	https://www.kegg.jp/kegg-bin/show_pathway?ko04921/K04515%09red/K12755%09red/K08045%09red/K08794%09red/K04513%09red/K04514%09red/K02677%09red/K04534%09red/K07198%09red/K07199%09red/K18154%09red/K04503%09red/K17388%09red/K08042%09red/K04963%09red/K08047%09red/K04863%09red/K07359%09red/K08049%09red/K04869%09red/K16342%09red/K12324%09red/K17901%09red/K12329%09red/K12318%09red/K04448%09red/K06269%09re…
Adherens junction	KEGG PATHWAY	ko04520	44	60	3.533245652	2.73E-18	1.71E-10	K05700:VCL|K04513:RHOA|K02105:CTNNB1|K07861:RAC3|K04388:TGFBR2,dd8fe47f-3eba-4b00-9c3f-4d09a466f03b,LOC101801641|K05748:WASF2|K05099:MET|K04237:PARD3|K06592:NECTIN3|K04501:SMAD4|K02620:TCF7|K05693:PTPRM|K06081:NECTIN1|K06083:WASF3|K06082:FARP2|K06085:SSX2IP|K06084:LMO7|K06086:SORBS1|K05699:ACTN2,ACTN1|K05747:WASL|K04427:LOC101800996|K04500:SMAD3,SMAD2|K04527:INSR|K05691:CTNNA1,CTNNA2,CTNNA3|K0569…	https://www.kegg.jp/kegg-bin/show_pathway?ko04520/K05700%09red/K04513%09red/K02105%09red/K07861%09red/K04388%09red/K05748%09red/K05099%09red/K04237%09red/K06592%09red/K04501%09red/K02620%09red/K05693%09red/K06081%09red/K06083%09red/K06082%09red/K06085%09red/K06084%09red/K06086%09red/K05699%09red/K05747%09red/K04427%09red/K04500%09red/K04527%09red/K05691%09red/K05690%09red/K03097%09red/K05692%09re…
Hepatitis B	KEGG PATHWAY	ko05161	58	113	2.472987705	4.87E-13	1.71E-10	K02373:FADD|K16197:YWHAB,YWHAZ,YWHAQ|K04692:STAT3|K04416:MAP3K1|K02677:PRKCA|K01110:PTEN|K04390:FAS|K10159:LOC110351185|K11220:STAT1|K02091:CDK6|K04448:JUN|K13376:TGFB2|K04398:CASP8|K06618:RB1|K04430:MAP2K4|K04400:LOC101799731|K08738:LOC113841161,CYC|K17454:E2F1|K04440:MAPK9,MAPK8|K04446:NFATC1|K05130:IFNAR1|K02187:CASP3|K04374:8ddd9e5e-2fd9-47f0-8e91-e094ab22b3c5|K02649:PIK3R5,PIK3R2,PIK3R1,LOC1…	https://www.kegg.jp/kegg-bin/show_pathway?ko05161/K02373%09red/K16197%09red/K04692%09red/K04416%09red/K02677%09red/K01110%09red/K04390%09red/K10159%09red/K11220%09red/K02091%09red/K04448%09red/K13376%09red/K04398%09red/K06618%09red/K04430%09red/K04400%09red/K08738%09red/K17454%09red/K04440%09red/K04446%09red/K05130%09red/K02187%09red/K04374%09red/K02649%09red/K09389%09red/K10140%09red/K09048%09re…
Longevity regulating pathway	KEGG PATHWAY	ko04211	42	68	2.97586198	2.07E-13	3.79E-10	K05087:IGF1R,a00f0252-04ca-4c37-b932-f1fdc0be18f9|K11411:SIRT1|K05870:CREB1|K08269:ULK1,ULK2|K19730:ATG101|K07198:PRKAA1|K16172:IRS1|K08042:ADCY2|K08047:ADCY7|K08733:APPL1|K07359:CAMKK2,CAMKK1|K08049:ADCY9|K11420:EHMT1|K07298:STK11|K07297:ADIPOR1|K04374:8ddd9e5e-2fd9-47f0-8e91-e094ab22b3c5|K02649:PIK3R5,PIK3R2,PIK3R1,LOC101795759|K10141:LOC101794001,SESN3,SESN1|K09048:CREB3,CREB3L2,CREB3L1|K04527…	https://www.kegg.jp/kegg-bin/show_pathway?ko04211/K05087%09red/K11411%09red/K05870%09red/K08269%09red/K19730%09red/K07198%09red/K16172%09red/K08042%09red/K08047%09red/K08733%09red/K07359%09red/K08049%09red/K11420%09red/K07298%09red/K07297%09red/K04374%09red/K02649%09red/K10141%09red/K09048%09red/K04527%09red/K09047%09red/K04688%09red/K00922%09red/K03259%09red/K07187%09red/K04345%09red/K08045%09re…
Aldosterone-regulated sodium reabsorption	KEGG PATHWAY	ko04960	14	26	2.594341213	0.000200563	1.20E-09	K01539:ATP1A1|K13302:35f85995-0c1d-4726-8206-c2fe65c1e435|K19662:PRKCB|K08555:NR3C2|K02677:PRKCA|K04527:INSR|K04827:SCNN1G|K13358:SLC9A3R2|K01540:ATP1B3,ATP1B1|K00922:PIK3CA,PIK3CB,PIK3CD,PIK3CG|K16172:IRS1|K13305:NEDD4L|K07827:KRAS|K02649:PIK3R5,PIK3R2,PIK3R1,LOC101795759	https://www.kegg.jp/kegg-bin/show_pathway?ko04960/K01539%09red/K13302%09red/K19662%09red/K08555%09red/K02677%09red/K04527%09red/K04827%09red/K13358%09red/K01540%09red/K00922%09red/K16172%09red/K13305%09red/K07827%09red/K02649%09red/
Various types of N-glycan biosynthesis	KEGG PATHWAY	ko00513	18	49	1.76990042	0.007218979	6.32E-09	K03843:ALG2|K12666:RPN1|K12667:RPN2|K00738:MGAT4B|K03844:ALG11|K03845:ALG3|K14459:HEXD|K07966:B4GALT1|K00781:ST3GAL3|K00717:FUT8|K07151:STT3A,STT3B|K00736:MGAT2|K13748:LOC101799353|K09657:B4GALNT4|K09656:B4GALNT3|K09673:CHST9|K01231:MAN2A2|K01230:MAN1A2	https://www.kegg.jp/kegg-bin/show_pathway?ko00513/K03843%09red/K12666%09red/K12667%09red/K00738%09red/K03844%09red/K03845%09red/K14459%09red/K07966%09red/K00781%09red/K00717%09red/K07151%09red/K00736%09red/K13748%09red/K09657%09red/K09656%09red/K09673%09red/K01231%09red/K01230%09red/
Hepatitis C	KEGG PATHWAY	ko05160	45	79	2.744465841	1.72E-12	1.36E-08	K16196:EIF2AK4|K16194:EIF2AK1|K04692:STAT3|K03083:GSK3B|K11220:STAT1|K08524:RXRA,c1d0c671-20aa-4705-8c5b-b54c1ca490b3|K02861:RIPK1|K04357:EGF|K04354:PPP2R2B,PPP2R2C|K09444:IRF1|K04706:PIAS1|K04441:MAPK12,MAPK14|K04440:MAPK9,MAPK8|K03237:EIF2S1|K05130:IFNAR1|K05131:IFNAR2|K07294:PPARA|K02649:PIK3R5,PIK3R2,PIK3R1,LOC101795759|K08860:EIF2AK3|K03099:SOS1,SOS2|K04365:BRAF|K06698:PSME3|K01165:RNASEL|K0…	https://www.kegg.jp/kegg-bin/show_pathway?ko05160/K16196%09red/K16194%09red/K04692%09red/K03083%09red/K11220%09red/K08524%09red/K02861%09red/K04357%09red/K04354%09red/K09444%09red/K04706%09red/K04441%09red/K04440%09red/K03237%09red/K05130%09red/K05131%09red/K07294%09red/K02649%09red/K08860%09red/K03099%09red/K04365%09red/K06698%09red/K01165%09red/K03158%09red/K04734%09red/K00922%09red/K11217%09re…
Platelet activation	KEGG PATHWAY	ko04611	44	87	2.43672114	5.89E-10	1.54E-08	K04514:ROCK1|K12757:LOC101795371|K04513:RHOA|K08508:SNAP23|K05732:ARHGAP35|K08042:ADCY2|K08047:ADCY7|K16059:STIM1|K08045:ADCY5|K07370:BTK|K08049:ADCY9|K07376:PRKG1,fda8dece-820b-46c6-a570-bf8ffaebfbcd|K04270:P2RY1|K16342:PLA2G4B|K04441:MAPK12,MAPK14|K06261:GP1BA|K05858:PLCB1,PLCB4,PLCB2|K06269:PPP1CB|K07836:RAP1B|K02649:PIK3R5,PIK3R2,PIK3R1,LOC101795759|K17388:ROCK2|K18952:PRKCZ|K05692:ACTB|K0090…	https://www.kegg.jp/kegg-bin/show_pathway?ko04611/K04514%09red/K12757%09red/K04513%09red/K08508%09red/K05732%09red/K08042%09red/K08047%09red/K16059%09red/K08045%09red/K07370%09red/K08049%09red/K07376%09red/K04270%09red/K16342%09red/K04441%09red/K06261%09red/K05858%09red/K06269%09red/K07836%09red/K02649%09red/K17388%09red/K18952%09red/K05692%09red/K00907%09red/K00922%09red/K05854%09red/K07361%09re…
Dilated cardiomyopathy	KEGG PATHWAY	ko05414	32	82	1.880219416	0.000113528	2.28E-08	K08042:ADCY2|K08047:ADCY7|K05719:ITGB1|K04863:CACNB2|K12045:TNNT2|K08049:ADCY9|K05865:TNNC1|K04869:CACNG4|K06480:ITGA1|K06265:DAG1|K06591:ITGB8|K12568:MYBPC3|K12567:TTN,81784d03-3365-47d9-921e-47d5c8fc0488|K10366:DMD|K04141:ADRB1|K12749:MYL3|K05692:ACTB|K04861:CACNA2D4|K12641:LMNA|K13377:f2baadea-afef-4d7c-8b77-f8b2dcf93f44|K04850:CACNA1C|K04345:PRKACB|K08045:ADCY5|K04857:CACNA1S|K04859:LOC101799…	https://www.kegg.jp/kegg-bin/show_pathway?ko05414/K08042%09red/K08047%09red/K05719%09red/K04863%09red/K12045%09red/K08049%09red/K05865%09red/K04869%09red/K06480%09red/K06265%09red/K06591%09red/K12568%09red/K12567%09red/K10366%09red/K04141%09red/K12749%09red/K05692%09red/K04861%09red/K12641%09red/K13377%09red/K04850%09red/K04345%09red/K08045%09red/K04857%09red/K04859%09red/K12566%09red/K06585%09re…
Toll-like receptor signaling pathway	KEGG PATHWAY	ko04620	26	76	1.648284455	0.00435682	2.46E-08	K02373:FADD|K04430:MAP2K4|K04734:NFKBIA|K11220:STAT1|K03160:CD40|K04398:CASP8|K02861:RIPK1|K09446:IRF5|K05398:LOC106020465|K04441:MAPK12,MAPK14|K04440:MAPK9,MAPK8|K05130:IFNAR1|K05131:IFNAR2|K04448:JUN|K02649:PIK3R5,PIK3R2,PIK3R1,LOC101795759|K04427:LOC101800996|K04404:TAB2|K10159:LOC110351185|K00922:PIK3CA,PIK3CB,PIK3CD,PIK3CG|K10160:TLR4|K03174:TRAF3|K03175:TRAF6|K07209:IKBKB|K04456:AKT3,AKT1|K…	https://www.kegg.jp/kegg-bin/show_pathway?ko04620/K02373%09red/K04430%09red/K04734%09red/K11220%09red/K03160%09red/K04398%09red/K02861%09red/K09446%09red/K05398%09red/K04441%09red/K04440%09red/K05130%09red/K05131%09red/K04448%09red/K02649%09red/K04427%09red/K04404%09red/K10159%09red/K00922%09red/K10160%09red/K03174%09red/K03175%09red/K07209%09red/K04456%09red/K02580%09red/K05410%09red/
Huntington's disease	KEGG PATHWAY	ko05016	57	149	1.843151332	6.38E-07	5.36E-08	K04559:HIP1|K02256:COX1|K04398:CASP8|K02187:CASP3|K03934:NDUFS1|K08738:LOC113841161,CYC|K06067:HDAC2|K10411:DNAL1|K03120:TBP,TBPL1|K02270:LOC101796089|K03129:LOC101804819,TAF4|K03008:POLR2J|K03009:POLR2K|K03961:NDUFB5|K04638:IFT57|K04645:LOC113839618|K04644:LOC101793731|K03967:NDUFC1|K03966:NDUFB10|K04648:DCTN1|K05863:SLC25A6,SLC25A4|K11830:TFAM|K04565:SOD1|K02137:ATP5PO|K05870:CREB1|K10408:DNAH9…	https://www.kegg.jp/kegg-bin/show_pathway?ko05016/K04559%09red/K02256%09red/K04398%09red/K02187%09red/K03934%09red/K08738%09red/K06067%09red/K10411%09red/K03120%09red/K02270%09red/K03129%09red/K03008%09red/K03009%09red/K03961%09red/K04638%09red/K04645%09red/K04644%09red/K03967%09red/K03966%09red/K04648%09red/K05863%09red/K11830%09red/K04565%09red/K02137%09red/K05870%09red/K10408%09red/K05858%09re…
Notch signaling pathway	KEGG PATHWAY	ko04330	19	28	3.269399386	9.75E-08	5.46E-08	K05948:LFNG,RFNG,MFNG|K06067:HDAC2|K04505:PSEN1|K06058:DTX2,DTX4,DTX3L|K06059:ADAM17|K06054:HES1,f86a55d5-4be1-4dd5-8884-02d056b45e04|K06055:LOC101799414|K06052:JAG1,JAG2|K04522:PSEN2|K02599:NOTCH1,3f50d37a-8ae7-4dd6-bf24-eb637056bec5,NOTCH2,bc350cc2-5988-4ae1-944d-1db3e93c8ced|K06051:DLL1,DLL4|K04498:e4b3cdd1-b969-4726-ad39-6142bc1448a0,CREBBP,EP300|K06066:CIR1|K06065:NCOR2|K06063:SNW1|K06061:MA…	https://www.kegg.jp/kegg-bin/show_pathway?ko04330/K05948%09red/K06067%09red/K04505%09red/K06058%09red/K06059%09red/K06054%09red/K06055%09red/K06052%09red/K04522%09red/K02599%09red/K06051%09red/K04498%09red/K06066%09red/K06065%09red/K06063%09red/K06061%09red/K02353%09red/K06053%09red/K04496%09red/
Non-small cell lung cancer	KEGG PATHWAY	ko05223	28	46	2.932733546	3.52E-09	1.03E-07	K04411:LOC101789768|K02677:PRKCA|K01116:PLCG1,LOC101792010|K08528:RARB|K02091:CDK6|K08524:RXRA,c1d0c671-20aa-4705-8c5b-b54c1ca490b3|K06618:RB1|K04357:EGF|K17454:E2F1|K05119:ALK|K02649:PIK3R5,PIK3R2,PIK3R1,LOC101795759|K09389:29befb83-4d49-48c6-8da4-9559c88e094d,E2F2|K03099:SOS1,SOS2|K04503:CCND1|K04365:BRAF|K00922:PIK3CA,PIK3CB,PIK3CD,PIK3CG|K07827:KRAS|K05859:PLCG2|K09850:RASSF1|K19662:PRKCB|K04…	https://www.kegg.jp/kegg-bin/show_pathway?ko05223/K04411%09red/K02677%09red/K01116%09red/K08528%09red/K02091%09red/K08524%09red/K06618%09red/K04357%09red/K17454%09red/K05119%09red/K02649%09red/K09389%09red/K03099%09red/K04503%09red/K04365%09red/K00922%09red/K07827%09red/K05859%09red/K09850%09red/K19662%09red/K04456%09red/K02833%09red/K08015%09red/K09408%09red/K04361%09red/K04366%09red/K04364%09re…
Thyroid cancer	KEGG PATHWAY	ko05216	13	28	2.236957475	0.002044294	1.25E-07	K09291:TPR|K02105:CTNNB1|K04503:CCND1|K09288:CCDC6|K02620:TCF7|K02833:HRAS|K04490:TCF7L1|K08524:RXRA,c1d0c671-20aa-4705-8c5b-b54c1ca490b3|K04491:TCF7L2|K04492:LEF1|K07827:KRAS|K04377:e9e98afd-35da-4c3b-b53e-531ca047a91b|K04365:BRAF	https://www.kegg.jp/kegg-bin/show_pathway?ko05216/K09291%09red/K02105%09red/K04503%09red/K09288%09red/K02620%09red/K02833%09red/K04490%09red/K08524%09red/K04491%09red/K04492%09red/K07827%09red/K04377%09red/K04365%09red/
Longevity regulating pathway - worm	KEGG PATHWAY	ko04212	30	55	2.628033956	3.45E-08	1.33E-07	K16197:YWHAB,YWHAZ,YWHAQ|K01110:PTEN|K11411:SIRT1|K08269:ULK1,ULK2|K09408:FOXO3|K11204:GCLC|K18461:WASHC1|K05638:NFE2L2,992c0e8b-f53d-4f57-8161-cbdee95dec6d|K04043:HSPA9|K10798:PARP3,PARP1|K17794:LOC101794888|K08341:GABARAPL2,GABARAPL1|K04441:MAPK12,MAPK14|K04440:MAPK9,MAPK8|K17491:PPP4R3B,PPP4R3A|K00507:SCD|K04527:INSR|K04688:RPS6KB1|K00922:PIK3CA,PIK3CB,PIK3CD,PIK3CG|K09414:HSF1|K19765:HSBP1L1|…	https://www.kegg.jp/kegg-bin/show_pathway?ko04212/K16197%09red/K01110%09red/K11411%09red/K08269%09red/K09408%09red/K11204%09red/K18461%09red/K05638%09red/K04043%09red/K10798%09red/K17794%09red/K08341%09red/K04441%09red/K04440%09red/K17491%09red/K00507%09red/K04527%09red/K04688%09red/K00922%09red/K09414%09red/K19765%09red/K03871%09red/K07203%09red/K16172%09red/K04374%09red/K17705%09red/K04456%09re…
Phototransduction - fly	KEGG PATHWAY	ko04745	10	18	2.676701252	0.001222981	1.47E-07	K04515:LOC113845138,CAMK2G|K02677:PRKCA|K05692:ACTB|K04958:ITPR1|K00910:GRK2|K13807:PPEF2|K13806:DAGLA|K05858:PLCB1,PLCB4,PLCB2|K04634:LOC101794123,LOC101790479|K02183:LOC101805317,CALM2,CALM1	https://www.kegg.jp/kegg-bin/show_pathway?ko04745/K04515%09red/K02677%09red/K05692%09red/K04958%09red/K00910%09red/K13807%09red/K13806%09red/K05858%09red/K04634%09red/K02183%09red/
Glutamatergic synapse	KEGG PATHWAY	ko04724	40	85	2.267323413	4.83E-08	1.71E-07	K14990:SLC38A1|K05203:GRIK3|K04538:GNB4|K02677:PRKCA|K04534:LOC101791437,LOC113844914|K01115:PLD1,e52d0119-c13a-4e50-baa5-40ad0b36e494|K15010:HOMER2,HOMER1|K00910:GRK2|K01915:GLUL|K08042:ADCY2|K08047:ADCY7|K04997:KCNJ3|K08045:ADCY5|K08049:ADCY9|K05201:GRIK1|K14207:SLC38A2|K16342:PLA2G4B|K04536:GNB1|K04607:GRM4|K06268:PPP3R1|K05197:GRIA1|K05210:GRIN2B|K05213:GRIN3A|K04543:GNG7|K04546:LOC101794407|…	https://www.kegg.jp/kegg-bin/show_pathway?ko04724/K14990%09red/K05203%09red/K04538%09red/K02677%09red/K04534%09red/K01115%09red/K15010%09red/K00910%09red/K01915%09red/K08042%09red/K08047%09red/K04997%09red/K08045%09red/K08049%09red/K05201%09red/K14207%09red/K16342%09red/K04536%09red/K04607%09red/K06268%09red/K05197%09red/K05210%09red/K05213%09red/K04543%09red/K04546%09red/K05198%09red/K05199%09re…
Wnt signaling pathway	KEGG PATHWAY	ko04310	72	103	3.367965847	5.47E-27	1.76E-07	K04515:LOC113845138,CAMK2G|K04506:SIAH1|K00408:WNT4|K04511:PRICKLE1,37b7b5c3-9246-4418-90d3-2ef5be6d7542,PRICKLE2|K10151:CCND2|K04513:RHOA|K01384:WNT11|K07861:RAC3|K04427:LOC101800996|K03068:LRP6,LRP5|K03083:GSK3B|K04503:CCND1|K02235:FZD2|K04507:CACYBP|K02157:AXIN1|K00182:WNT2|K02353:DVL3,DVL1|K02354:FZD4|K02376:FZD6|K17388:ROCK2|K03868:RBX1|K08957:CSNK1A1|K19882:NOTUM|K04510:VANGL1|K02620:TCF7|K…	https://www.kegg.jp/kegg-bin/show_pathway?ko04310/K04515%09red/K04506%09red/K00408%09red/K04511%09red/K10151%09red/K04513%09red/K01384%09red/K07861%09red/K04427%09red/K03068%09red/K03083%09red/K04503%09red/K02235%09red/K04507%09red/K02157%09red/K00182%09red/K02353%09red/K02354%09red/K02376%09red/K17388%09red/K03868%09red/K08957%09red/K19882%09red/K04510%09red/K02620%09red/K04440%09red/K04446%09re…
Hedgehog signaling pathway - fly	KEGG PATHWAY	ko04341	16	24	3.212041502	1.49E-06	3.57E-07	K04345:PRKACB|K04678:SMURF1,SMURF2|K03869:CUL3|K08957:CSNK1A1|K08958:CSNK1G1,CSNK1G2,CSNK1G3|K03083:GSK3B|K04662:BMP2,BMP4|K06229:SUFU|K06228:STK36|K10523:SPOP|K03868:RBX1|K03347:CUL1|K08291:GRK6,LOC113839743,LOC101797744,GRK4,GRK5|K03362:FBXW11,BTRC|K06225:PTCH1|K06226:SMO	https://www.kegg.jp/kegg-bin/show_pathway?ko04341/K04345%09red/K04678%09red/K03869%09red/K08957%09red/K08958%09red/K03083%09red/K04662%09red/K06229%09red/K06228%09red/K10523%09red/K03868%09red/K03347%09red/K08291%09red/K03362%09red/K06225%09red/K06226%09red/
AMPK signaling pathway	KEGG PATHWAY	ko04152	50	82	2.937842837	2.21E-15	6.32E-07	K05087:IGF1R,a00f0252-04ca-4c37-b932-f1fdc0be18f9|K00850:PFKL,PFKP|K07203:MTOR|K05870:CREB1|K00665:FASN|K07198:PRKAA1|K07199:PRKAB1,PRKAB2|K05062:LEPR|K11262:ACACA|K19030:LOC101795985|K07359:CAMKK2,CAMKK1|K18341:TBC1D1|K08271:STRADA|K01084:G6PC2|K01578:MLYCD|K07298:STK11|K07297:ADIPOR1|K11583:PPP2R3A,PPP2R3B|K11584:PPP2R5A,PPP2R5D,PPP2R5E,PPP2R5C|K00507:SCD|K02649:PIK3R5,PIK3R2,PIK3R1,LOC10179575…	https://www.kegg.jp/kegg-bin/show_pathway?ko04152/K05087%09red/K00850%09red/K07203%09red/K05870%09red/K00665%09red/K07198%09red/K07199%09red/K05062%09red/K11262%09red/K19030%09red/K07359%09red/K18341%09red/K08271%09red/K01084%09red/K01578%09red/K07298%09red/K07297%09red/K11583%09red/K11584%09red/K00507%09red/K02649%09red/K04427%09red/K11411%09red/K09048%09red/K04503%09red/K04527%09red/K05031%09re…
Basal transcription factors	KEGG PATHWAY	ko03022	20	35	2.753178431	2.56E-06	7.82E-07	K10842:MNAT1|K03142:GTF2H2|K03135:TAF11|K03137:GTF2E2|K03130:TAF5L,TAF5|K14651:TAF15|K14650:TAF3|K03136:GTF2E1|K03141:GTF2H1|K03125:TAF1|K14649:TAF8|K03126:LOC101790622|K03132:TAF7L|K03120:TBP,TBPL1|K03123:GTF2A2|K10843:LOC101798344,ERCC3|K03121:GTF2IRD1,GTF2I|K03129:LOC101804819,TAF4|K03128:TAF2|K03139:GTF2F2	https://www.kegg.jp/kegg-bin/show_pathway?ko03022/K10842%09red/K03142%09red/K03135%09red/K03137%09red/K03130%09red/K14651%09red/K14650%09red/K03136%09red/K03141%09red/K03125%09red/K14649%09red/K03126%09red/K03132%09red/K03120%09red/K03123%09red/K10843%09red/K03121%09red/K03129%09red/K03128%09red/K03139%09red/
Vasopressin-regulated water reabsorption	KEGG PATHWAY	ko04962	18	33	2.628033956	1.96E-05	8.07E-07	K04345:PRKACB|K12462:ARHGDIB|K09048:CREB3,CREB3L2,CREB3L1|K04648:DCTN1|K08049:ADCY9|K09047:CREB5|K10413:DYNC1H1|K05870:CREB1|K07888:LOC113840038|K10415:DYNC1I1,DYNC1I2|K10414:DYNC2H1|K10417:DYNC2LI1|K10416:DYNC1LI2,DYNC1LI1|K10418:LOC113839606,LOC101791011,LOC101790824,DYNLL2|K04632:GNAS|K10428:DCTN6|K07887:RAB5A|K09876:AQP3	https://www.kegg.jp/kegg-bin/show_pathway?ko04962/K04345%09red/K12462%09red/K09048%09red/K04648%09red/K08049%09red/K09047%09red/K10413%09red/K05870%09red/K07888%09red/K10415%09red/K10414%09red/K10417%09red/K10416%09red/K10418%09red/K04632%09red/K10428%09red/K07887%09red/K09876%09red/
Protein processing in endoplasmic reticulum	KEGG PATHWAY	ko04141	80	140	2.753178431	2.76E-21	1.14E-06	K16196:EIF2AK4|K16194:EIF2AK1|K10597:UBE4B|K11519:DERL1|K13989:DERL2|K01367:LOC113843044|K10575:UBE2G1|K10666:RNF185|K04554:UBE2J2|K08852:ERN1|K05638:NFE2L2,992c0e8b-f53d-4f57-8161-cbdee95dec6d|K12667:RPN2|K09518:DNAJB12|K03173:TRAF2|K11863:LOC101800174|K09530:DNAJC10|K14025:SELENOS|K09486:HYOU1|K14027:HERPUD1|K14020:WFS1|K08653:MBTPS1|K07953:SAR1A|K10956:SEC61A1|K09556:BAG2|K10839:RAD23B|K09555:…	https://www.kegg.jp/kegg-bin/show_pathway?ko04141/K16196%09red/K16194%09red/K10597%09red/K11519%09red/K13989%09red/K01367%09red/K10575%09red/K10666%09red/K04554%09red/K08852%09red/K05638%09red/K12667%09red/K09518%09red/K03173%09red/K11863%09red/K09530%09red/K14025%09red/K09486%09red/K14027%09red/K14020%09red/K08653%09red/K07953%09red/K10956%09red/K09556%09red/K10839%09red/K09555%09red/K07151%09re…
Insulin secretion	KEGG PATHWAY	ko04911	27	67	1.941607177	0.000204116	1.34E-06	K04515:LOC113845138,CAMK2G|K02677:PRKCA|K08042:ADCY2|K04944:KCNN3|K08047:ADCY7|K04943:KCNN2,ee217de9-8b42-49b8-9d9c-cbdcd6797f5c|K08045:ADCY5|K08049:ADCY9|K04560:STX1A|K07299:SLC2A1|K04374:8ddd9e5e-2fd9-47f0-8e91-e094ab22b3c5|K01539:ATP1A1|K05032:ABCC8|K09048:CREB3,CREB3L2,CREB3L1|K09047:CREB5|K04936:KCNMA1|K05858:PLCB1,PLCB4,PLCB2|K04850:CACNA1C|K04345:PRKACB|K19662:PRKCB|K04131:CHRM3|K04857:CAC…	https://www.kegg.jp/kegg-bin/show_pathway?ko04911/K04515%09red/K02677%09red/K08042%09red/K04944%09red/K08047%09red/K04943%09red/K08045%09red/K08049%09red/K04560%09red/K07299%09red/K04374%09red/K01539%09red/K05032%09red/K09048%09red/K09047%09red/K04936%09red/K05858%09red/K04850%09red/K04345%09red/K19662%09red/K04131%09red/K04857%09red/K05870%09red/K01540%09red/K04632%09red/K04634%09red/K04635%09re…
Jak-STAT signaling pathway	KEGG PATHWAY	ko04630	43	129	1.606020751	0.000555857	1.38E-06	K04697:SOCS4|K04694:SOCS1|K04695:SOCS2|K04692:STAT3|K10151:CCND2|K11217:JAK1|K04698:SOCS5|K04699:SOCS6|K11220:STAT1|K03099:SOS1,SOS2|K04503:CCND1|K05062:LEPR|K04705:STAM,STAM2|K04706:PIAS1|K02833:HRAS|K04447:JAK2|K04702:PIM1|K05130:IFNAR1|K05131:IFNAR2|K05132:IFNGR1|K05133:IFNGR2|K07293:LOC101789439|K02649:PIK3R5,PIK3R2,PIK3R1,LOC101795759|K05071:IL4R|K16063:PIAS2,23cdbee7-ac98-4381-bc03-6a3193d1…	https://www.kegg.jp/kegg-bin/show_pathway?ko04630/K04697%09red/K04694%09red/K04695%09red/K04692%09red/K10151%09red/K11217%09red/K04698%09red/K04699%09red/K11220%09red/K03099%09red/K04503%09red/K05062%09red/K04705%09red/K04706%09red/K02833%09red/K04447%09red/K04702%09red/K05130%09red/K05131%09red/K05132%09red/K05133%09red/K07293%09red/K02649%09red/K05071%09red/K16063%09red/K05059%09red/K05058%09re…
Vascular smooth muscle contraction	KEGG PATHWAY	ko04270	46	96	2.30865483	2.33E-09	1.56E-06	K12755:MYL9|K04513:RHOA|K04514:ROCK1|K02677:PRKCA|K18050:PRKCE,5ad0a8fe-8aee-43af-8b2a-d5840b109e92|K08449:RAMP3|K17388:ROCK2|K08042:ADCY2|K08047:ADCY7|K08045:ADCY5|K12333:278789ba-bdb0-44ce-a3f0-32cf099e625d|K08049:ADCY9|K07376:PRKG1,fda8dece-820b-46c6-a570-bf8ffaebfbcd|K16342:PLA2G4B|K01047:PROCA1|K12324:NPR2|K12327:CALD1|K12329:PPP1R12B|K12318:GUCY1A2,GUCY1A1|K06269:PPP1CB|K04166:AGTR1|K02183:…	https://www.kegg.jp/kegg-bin/show_pathway?ko04270/K12755%09red/K04513%09red/K04514%09red/K02677%09red/K18050%09red/K08449%09red/K17388%09red/K08042%09red/K08047%09red/K08045%09red/K12333%09red/K08049%09red/K07376%09red/K16342%09red/K01047%09red/K12324%09red/K12327%09red/K12329%09red/K12318%09red/K06269%09red/K04166%09red/K02183%09red/K16367%09red/K00907%09red/K04936%09red/K04634%09red/K04577%09re…
Colorectal cancer	KEGG PATHWAY	ko05210	34	49	3.343145237	2.81E-13	2.15E-06	K04513:RHOA|K07861:RAC3|K03083:GSK3B|K02157:AXIN1|K04448:JUN|K08735:MSH2|K08737:MSH6|K08733:APPL1|K08732:RALGDS|K08738:LOC113841161,CYC|K02620:TCF7|K04440:MAPK9,MAPK8|K02187:CASP3|K02649:PIK3R5,PIK3R2,PIK3R1,LOC101795759|K02105:CTNNB1|K04503:CCND1|K04500:SMAD3,SMAD2|K04501:SMAD4|K02085:APC2,APC,94caf6ee-5bd3-4149-b3fb-b9adb3de19ca|K00922:PIK3CA,PIK3CB,PIK3CD,PIK3CG|K02161:BCL2|K13377:f2baadea-afe…	https://www.kegg.jp/kegg-bin/show_pathway?ko05210/K04513%09red/K07861%09red/K03083%09red/K02157%09red/K04448%09red/K08735%09red/K08737%09red/K08733%09red/K08732%09red/K08738%09red/K02620%09red/K04440%09red/K02187%09red/K02649%09red/K02105%09red/K04503%09red/K04500%09red/K04501%09red/K02085%09red/K00922%09red/K02161%09red/K13377%09red/K04388%09red/K07827%09red/K04674%09red/K04385%09red/K04456%09re…
p53 signaling pathway	KEGG PATHWAY	ko04115	32	61	2.527508067	4.21E-08	3.00E-06	K10143:COP1|K04398:CASP8|K10151:CCND2|K01110:PTEN|K04390:FAS|K04728:ATM|K16857:THBS1|K02216:CHEK1|K02091:CDK6|K10138:IGFBP3,78509379-29a8-4d56-8f8f-c89d4bbbfd12|K04503:CCND1|K05868:CCNB2|K08738:LOC113841161,CYC|K02187:CASP3|K04506:SIAH1|K10142:STEAP3|K10141:LOC101794001,SESN3,SESN1|K10140:DDB2|K10147:PPM1D|K10146:CCNG2|K10148:TP73|K04402:GADD45B,GADD45A|K10127:MDM4|K10129:GTSE1|K06626:CCNE1,CCNE2…	https://www.kegg.jp/kegg-bin/show_pathway?ko04115/K10143%09red/K04398%09red/K10151%09red/K01110%09red/K04390%09red/K04728%09red/K16857%09red/K02216%09red/K02091%09red/K10138%09red/K04503%09red/K05868%09red/K08738%09red/K02187%09red/K04506%09red/K10142%09red/K10141%09red/K10140%09red/K10147%09red/K10146%09red/K10148%09red/K04402%09red/K10127%09red/K10129%09red/K06626%09red/K06509%09red/K06643%09re…
Type II diabetes mellitus	KEGG PATHWAY	ko04930	19	37	2.474140076	3.57E-05	3.25E-06	K04850:CACNA1C|K07209:IKBKB|K04694:SOCS1|K05032:ABCC8|K04854:CACNA1G|K04527:INSR|K07203:MTOR|K00844:LOC101794107,LOC101794283|K04852:CACNA1E|K16172:IRS1|K18050:PRKCE,5ad0a8fe-8aee-43af-8b2a-d5840b109e92|K00922:PIK3CA,PIK3CB,PIK3CD,PIK3CG|K04440:MAPK9,MAPK8|K04695:SOCS2|K18952:PRKCZ|K04697:SOCS4|K00873:PKM|K07187:IRS4,IRS2|K02649:PIK3R5,PIK3R2,PIK3R1,LOC101795759	https://www.kegg.jp/kegg-bin/show_pathway?ko04930/K04850%09red/K07209%09red/K04694%09red/K05032%09red/K04854%09red/K04527%09red/K07203%09red/K00844%09red/K04852%09red/K16172%09red/K18050%09red/K00922%09red/K04440%09red/K04695%09red/K18952%09red/K04697%09red/K00873%09red/K07187%09red/K02649%09red/
PI3K-Akt signaling pathway	KEGG PATHWAY	ko04151	117	240	2.348805349	1.53E-22	4.40E-06	K01110:PTEN|K09408:FOXO3|K17386:PDGFB|K02091:CDK6|K09487:HSP90B1|K05448:VEGFA|K06591:ITGB8|K16340:PHLPP2,PHLPP1|K11583:PPP2R3A,PPP2R3B|K11584:PPP2R5A,PPP2R5D,PPP2R5E,PPP2R5C|K04374:8ddd9e5e-2fd9-47f0-8e91-e094ab22b3c5|K04377:e9e98afd-35da-4c3b-b53e-531ca047a91b|K09048:CREB3,CREB3L2,CREB3L1|K04503:CCND1|K09047:CREB5|K02539:MCL1|K04347:GNG12|K11217:JAK1|K08270:DDIT4|K05453:CSF1|K05450:PDGFD,PDGFC|K…	https://www.kegg.jp/kegg-bin/show_pathway?ko04151/K01110%09red/K09408%09red/K17386%09red/K02091%09red/K09487%09red/K05448%09red/K06591%09red/K16340%09red/K11583%09red/K11584%09red/K04374%09red/K04377%09red/K09048%09red/K04503%09red/K09047%09red/K02539%09red/K04347%09red/K11217%09red/K08270%09red/K05453%09red/K05450%09red/K06071%09red/K04570%09red/K04079%09red/K04456%09red/K12230%09red/K05087%09re…
Glycosylphosphatidylinositol(GPI)-anchor biosynthesis	KEGG PATHWAY	ko00563	12	26	2.22372104	0.003215417	7.13E-06	K05310:77fe8591-a63c-4d0f-aa11-ea0a2ea35bba|K03857:PIGA|K03859:PIGC|K03858:PIGH|K03860:PIGQ|K05288:PIGO|K05287:PIGF,LOC101799339|K05284:PIGM|K05291:SPAG5,PIGS|K05283:PIGW|K05293:PIGU|K03434:PIGL	https://www.kegg.jp/kegg-bin/show_pathway?ko00563/K05310%09red/K03857%09red/K03859%09red/K03858%09red/K03860%09red/K05288%09red/K05287%09red/K05284%09red/K05291%09red/K05283%09red/K05293%09red/K03434%09red/
Glucagon signaling pathway	KEGG PATHWAY	ko04922	32	55	2.80323622	1.35E-09	8.40E-06	K04515:LOC113845138,CAMK2G|K16311:SIK2|K11411:SIRT1|K19008:SIK1|K07198:PRKAA1|K07199:PRKAB1,PRKAB2|K00873:PKM|K11262:ACACA|K07190:PHKA2|K08042:ADCY2|K13296:e6ab3f9e-964b-4bae-86fb-10b89616bc6e,PDE3B|K07299:SLC2A1|K05870:CREB1|K17491:PPP4R3B,PPP4R3A|K07294:PPARA|K01084:G6PC2|K06268:PPP3R1|K02183:LOC101805317,CALM2,CALM1|K09048:CREB3,CREB3L2,CREB3L1|K09047:CREB5|K05858:PLCB1,PLCB4,PLCB2|K04345:PRKA…	https://www.kegg.jp/kegg-bin/show_pathway?ko04922/K04515%09red/K16311%09red/K11411%09red/K19008%09red/K07198%09red/K07199%09red/K00873%09red/K11262%09red/K07190%09red/K08042%09red/K13296%09red/K07299%09red/K05870%09red/K17491%09red/K07294%09red/K01084%09red/K06268%09red/K02183%09red/K09048%09red/K09047%09red/K05858%09red/K04345%09red/K07200%09red/K07201%09red/K07202%09red/K04348%09red/K04958%09re…
Fanconi anemia pathway	KEGG PATHWAY	ko03460	30	54	2.676701252	1.96E-08	2.50E-05	K13960:UBE2T|K10605:BRCA1|K11511:LOC101801085|K02350:REV3L|K10882:EME1|K03165:TOP3A,TOP3B|K10740:RPA3|K04482:RAD51|K10858:PMS2|K07466:RPA1|K08775:BRCA2|K03509:POLH|K11832:USP1|K11137:TELO2|K03515:REV1|K03510:POLI|K10739:RPA2|K10897:PALB2|K10896:FANCM|K10891:FANCD2|K10893:FANCF|K10892:FANCE|K10484:SLX4|K10905:ATRIP|K10901:BLM|K16618:LOC113843423|K06054:HES1,f86a55d5-4be1-4dd5-8884-02d056b45e04|K06…	https://www.kegg.jp/kegg-bin/show_pathway?ko03460/K13960%09red/K10605%09red/K11511%09red/K02350%09red/K10882%09red/K03165%09red/K10740%09red/K04482%09red/K10858%09red/K07466%09red/K08775%09red/K03509%09red/K11832%09red/K11137%09red/K03515%09red/K03510%09red/K10739%09red/K10897%09red/K10896%09red/K10891%09red/K10893%09red/K10892%09red/K10484%09red/K10905%09red/K10901%09red/K16618%09red/K06054%09re…
Lysine degradation	KEGG PATHWAY	ko00310	22	72	1.472185689	0.032032325	2.52E-05	K11419:SUV39H2|K00626:ACAT1|K11423:LOC101805218,SETD2|K11422:SETD1B|K11421:SETDB1|K11420:EHMT1|K11427:DOT1L|K11425:NSD3|K11424:NSD2|K11429:KMT5B|K11428:7cb0fdac-ae09-4179-97ff-96075380766e,KMT5A|K15588:NSD1|K11431:SETD7|K18494:LOC101790074|K09189:KMT2E|K09188:KMT2C|K00164:OGDHL|K09186:KMT2A|K00128:LOC113839578|K11703:COLGALT2|K00473:PLOD1|K11433:LOC101794070	https://www.kegg.jp/kegg-bin/show_pathway?ko00310/K11419%09red/K00626%09red/K11423%09red/K11422%09red/K11421%09red/K11420%09red/K11427%09red/K11425%09red/K11424%09red/K11429%09red/K11428%09red/K15588%09red/K11431%09red/K18494%09red/K09189%09red/K09188%09red/K00164%09red/K09186%09red/K00128%09red/K11703%09red/K00473%09red/K11433%09red/
Osteoclast differentiation	KEGG PATHWAY	ko04380	47	99	2.287362888	2.30E-09	2.59E-05	K04694:SOCS1|K04734:NFKBIA|K05870:CREB1|K11220:STAT1|K09438:SPI1|K09030:FOSL2|K05703:FYN|K06551:LOC101800841|K07370:BTK|K04441:MAPK12,MAPK14|K04440:MAPK9,MAPK8|K04446:NFATC1|K08008:LOC101792171|K05130:IFNAR1|K05131:IFNAR2|K04449:JUND|K05133:IFNGR2|K06268:PPP3R1|K02649:PIK3R5,PIK3R2,PIK3R1,LOC101795759|K04388:TGFBR2,dd8fe47f-3eba-4b00-9c3f-4d09a466f03b,LOC101801641|K04427:LOC101800996|K04404:TAB2|…	https://www.kegg.jp/kegg-bin/show_pathway?ko04380/K04694%09red/K04734%09red/K05870%09red/K11220%09red/K09438%09red/K09030%09red/K05703%09red/K06551%09red/K07370%09red/K04441%09red/K04440%09red/K04446%09red/K08008%09red/K05130%09red/K05131%09red/K04449%09red/K05133%09red/K06268%09red/K02649%09red/K04388%09red/K04427%09red/K04404%09red/K03158%09red/K04466%09red/K09455%09red/K07361%09red/K11217%09re…
Apoptosis - multiple species	KEGG PATHWAY	ko04215	17	39	2.100180982	0.001063672	3.68E-05	K02373:FADD|K02187:CASP3|K04398:CASP8|K08669:LOC101802615|K16060:BIRC2|K04440:MAPK9,MAPK8|K02561:BOK|K03158:LOC101801004|K08738:LOC113841161,CYC|K04570:BCL2L1|K04725:XIAP|K16341:BCL2L11|K10522:DIABLO|K02161:BCL2|K02583:NGFR|K08334:BECN1|K10586:BIRC6	https://www.kegg.jp/kegg-bin/show_pathway?ko04215/K02373%09red/K02187%09red/K04398%09red/K08669%09red/K16060%09red/K04440%09red/K02561%09red/K03158%09red/K08738%09red/K04570%09red/K04725%09red/K16341%09red/K10522%09red/K02161%09red/K02583%09red/K08334%09red/K10586%09red/
Insulin resistance	KEGG PATHWAY	ko04931	43	73	2.83803667	1.11E-12	3.90E-05	K09113:MLXIP|K04692:STAT3|K01110:PTEN|K03083:GSK3B|K05870:CREB1|K18050:PRKCE,5ad0a8fe-8aee-43af-8b2a-d5840b109e92|K07198:PRKAA1|K07199:PRKAB1,PRKAB2|K09667:OGT|K04440:MAPK9,MAPK8|K07299:SLC2A1|K01084:G6PC2|K04373:RPS6KA6,RPS6KA2,RPS6KA3|K07294:PPARA|K07293:LOC101789439|K02649:PIK3R5,PIK3R2,PIK3R1,LOC101795759|K09048:CREB3,CREB3L2,CREB3L1|K04527:INSR|K05695:PTPRF|K09047:CREB5|K03158:LOC101801004|K…	https://www.kegg.jp/kegg-bin/show_pathway?ko04931/K09113%09red/K04692%09red/K01110%09red/K03083%09red/K05870%09red/K18050%09red/K07198%09red/K07199%09red/K09667%09red/K04440%09red/K07299%09red/K01084%09red/K04373%09red/K07294%09red/K07293%09red/K02649%09red/K09048%09red/K04527%09red/K05695%09red/K09047%09red/K03158%09red/K04688%09red/K05696%09red/K08745%09red/K07189%09red/K06269%09red/K04734%09re…
Melanoma	KEGG PATHWAY	ko05218	25	42	2.867894198	4.63E-08	4.09E-05	K01110:PTEN|K02091:CDK6|K17454:E2F1|K05099:MET|K04357:EGF|K04359:PDGFA|K04358:FGF12,FGF16,FGF13,FGF7,FGF18,FGF9,FGF10,FGF3|K17386:PDGFB|K06618:RB1|K02649:PIK3R5,PIK3R2,PIK3R1,LOC101795759|K09389:29befb83-4d49-48c6-8da4-9559c88e094d,E2F2|K04503:CCND1|K09455:MITF|K07827:KRAS|K05450:PDGFD,PDGFC|K05089:PDGFRB|K06643:MDM2|K05087:IGF1R,a00f0252-04ca-4c37-b932-f1fdc0be18f9|K00922:PIK3CA,PIK3CB,PIK3CD,PI…	https://www.kegg.jp/kegg-bin/show_pathway?ko05218/K01110%09red/K02091%09red/K17454%09red/K05099%09red/K04357%09red/K04359%09red/K04358%09red/K17386%09red/K06618%09red/K02649%09red/K09389%09red/K04503%09red/K09455%09red/K07827%09red/K05450%09red/K05089%09red/K06643%09red/K05087%09red/K00922%09red/K04456%09red/K02833%09red/K04363%09red/K04361%09red/K04366%09red/K04365%09red/
Estrogen signaling pathway	KEGG PATHWAY	ko04915	38	65	2.816713317	3.15E-11	4.99E-05	K04534:LOC101791437,LOC113844914|K05870:CREB1|K09571:FKBP5,FKBP4|K03099:SOS1,SOS2|K08523:HBEGF|K08042:ADCY2|K09487:HSP90B1|K08047:ADCY7|K08045:ADCY5|K08049:ADCY9|K05000:KCNJ6|K04448:JUN|K04374:8ddd9e5e-2fd9-47f0-8e91-e094ab22b3c5|K02649:PIK3R5,PIK3R2,PIK3R1,LOC101795759|K02183:LOC101805317,CALM2,CALM1|K09048:CREB3,CREB3L2,CREB3L1|K04997:KCNJ3|K09047:CREB5|K01398:MMP2|K00922:PIK3CA,PIK3CB,PIK3CD,P…	https://www.kegg.jp/kegg-bin/show_pathway?ko04915/K04534%09red/K05870%09red/K09571%09red/K03099%09red/K08523%09red/K08042%09red/K09487%09red/K08047%09red/K08045%09red/K08049%09red/K05000%09red/K04448%09red/K04374%09red/K02649%09red/K02183%09red/K09048%09red/K04997%09red/K09047%09red/K01398%09red/K00922%09red/K07827%09red/K04632%09red/K05858%09red/K04345%09red/K04361%09red/K04366%09red/K04958%09re…
Cocaine addiction	KEGG PATHWAY	ko05030	16	38	2.028657791	0.002297598	6.02E-05	K00274:LOC101793000|K04345:PRKACB|K08045:ADCY5|K09048:CREB3,CREB3L2,CREB3L1|K05210:GRIN2B|K05213:GRIN3A|K09047:CREB5|K05870:CREB1|K05198:GRIA2|K04374:8ddd9e5e-2fd9-47f0-8e91-e094ab22b3c5|K02580:NFKB1|K11716:CDK5R1|K04630:GNAI3|K04632:GNAS|K04448:JUN|K15839:GPSM1	https://www.kegg.jp/kegg-bin/show_pathway?ko05030/K00274%09red/K04345%09red/K08045%09red/K09048%09red/K05210%09red/K05213%09red/K09047%09red/K05870%09red/K05198%09red/K04374%09red/K02580%09red/K11716%09red/K04630%09red/K04632%09red/K04448%09red/K15839%09red/
Spliceosome	KEGG PATHWAY	ko03040	67	121	2.667852653	4.61E-17	8.72E-05	K12815:DHX38|K12811:DDX46|K12888:HNRNPU|K19604:RP9|K11094:SNRPB2|K12741:HNRNPA3|K12862:PLRG1|K12863:CWC15|K11087:SNRPD1|K11086:SNRPB|K12866:LOC113840710,WBP11|K12849:PRPF38A|K12864:CTNNBL1|K12878:THOC1|K12869:CRNKL1|K12840:RBM17|K11088:SNRPD3|K12842:U2SURP|K12843:PRPF3|K12828:SF3B1|K12826:SF3A2|K12827:SF3A3|K12824:TCERG1|K12825:SF3A1|K12822:RBM25|K12823:DDX5|K12820:DHX15|K12841:CHERP|K12882:NCBP1…	https://www.kegg.jp/kegg-bin/show_pathway?ko03040/K12815%09red/K12811%09red/K12888%09red/K19604%09red/K11094%09red/K12741%09red/K12862%09red/K12863%09red/K11087%09red/K11086%09red/K12866%09red/K12849%09red/K12864%09red/K12878%09red/K12869%09red/K12840%09red/K11088%09red/K12842%09red/K12843%09red/K12828%09red/K12826%09red/K12827%09red/K12824%09red/K12825%09red/K12822%09red/K12823%09red/K12820%09re…
Leishmaniasis	KEGG PATHWAY	ko05140	20	57	1.690548159	0.008517973	9.21E-05	K04427:LOC101800996|K13376:TGFB2|K04734:NFKBIA|K05719:ITGB1|K19662:PRKCB|K04404:TAB2|K04011:LOC101790506|K10159:LOC110351185|K08010:NCF2|K04441:MAPK12,MAPK14|K04448:JUN|K04447:JAK2|K11220:STAT1|K11217:JAK1|K02580:NFKB1|K10160:TLR4|K05132:IFNGR1|K05133:IFNGR2|K13377:f2baadea-afef-4d7c-8b77-f8b2dcf93f44|K03175:TRAF6	https://www.kegg.jp/kegg-bin/show_pathway?ko05140/K04427%09red/K13376%09red/K04734%09red/K05719%09red/K19662%09red/K04404%09red/K04011%09red/K10159%09red/K08010%09red/K04441%09red/K04448%09red/K04447%09red/K11220%09red/K11217%09red/K02580%09red/K10160%09red/K05132%09red/K05133%09red/K13377%09red/K03175%09red/
Inositol phosphate metabolism	KEGG PATHWAY	ko00562	32	64	2.409031127	1.83E-07	0.000149698	K00913:ITPK1|K03084:INPP5D|K01116:PLCG1,LOC101792010|K00915:IPMK|K00911:ITPKB,ITPKA|K13711:PI4K2B|K20278:INPP5E|K20279:SYNJ2,ceb61a56-1039-4b2a-9b62-1708c0788339,SYNJ1|K03103:10e06f13-700c-45db-8cca-ca7799ee2ac4|K05860:PLCE1|K01110:PTEN|K00889:PIP5K1C,PIP5K1A|K01109:INPP4A|K01108:MTM1|K10572:IPPK|K01106:INPP5K|K05857:PLCD3,PLCD1|K00921:PIKFYVE|K00922:PIK3CA,PIK3CB,PIK3CD,PIK3CG|K00923:PIK3C2A|K05…	https://www.kegg.jp/kegg-bin/show_pathway?ko00562/K00913%09red/K03084%09red/K01116%09red/K00915%09red/K00911%09red/K13711%09red/K20278%09red/K20279%09red/K03103%09red/K05860%09red/K01110%09red/K00889%09red/K01109%09red/K01108%09red/K10572%09red/K01106%09red/K05857%09red/K00921%09red/K00922%09red/K00923%09red/K05859%09red/K05858%09red/K00920%09red/K19006%09red/K01092%09red/K15759%09red/K01803%09re…
Hypertrophic cardiomyopathy (HCM)	KEGG PATHWAY	ko05410	29	75	1.862984071	0.000281404	0.000188701	K07198:PRKAA1|K07199:PRKAB1,PRKAB2|K01283:ACE|K04861:CACNA2D4|K05719:ITGB1|K04863:CACNB2|K12045:TNNT2|K06487:ITGAV|K05865:TNNC1|K04869:CACNG4|K06480:ITGA1|K06265:DAG1|K06591:ITGB8|K12568:MYBPC3|K12567:TTN,81784d03-3365-47d9-921e-47d5c8fc0488|K10366:DMD|K12749:MYL3|K05692:ACTB|K12641:LMNA|K04850:CACNA1C|K04857:CACNA1S|K07200:PRKAG2|K04859:LOC101799806|K12566:SGCB|K06585:ITGA9|K10351:LOC101803605|K…	https://www.kegg.jp/kegg-bin/show_pathway?ko05410/K07198%09red/K07199%09red/K01283%09red/K04861%09red/K05719%09red/K04863%09red/K12045%09red/K06487%09red/K05865%09red/K04869%09red/K06480%09red/K06265%09red/K06591%09red/K12568%09red/K12567%09red/K10366%09red/K12749%09red/K05692%09red/K12641%09red/K04850%09red/K04857%09red/K07200%09red/K04859%09red/K12566%09red/K06585%09red/K10351%09red/K13377%09re…
Amphetamine addiction	KEGG PATHWAY	ko05031	24	45	2.569633202	1.40E-06	0.00022971	K04515:LOC113845138,CAMK2G|K02677:PRKCA|K11411:SIRT1|K08045:ADCY5|K04560:STX1A|K00274:LOC101793000|K04448:JUN|K06269:PPP1CB|K04374:8ddd9e5e-2fd9-47f0-8e91-e094ab22b3c5|K02183:LOC101805317,CALM2,CALM1|K05197:GRIA1|K09048:CREB3,CREB3L2,CREB3L1|K05210:GRIN2B|K05213:GRIN3A|K09047:CREB5|K05198:GRIA2|K05199:GRIA3|K04850:CACNA1C|K04345:PRKACB|K19662:PRKCB|K04348:PPP3CA,PPP3CB|K05870:CREB1|K06268:PPP3R1|…	https://www.kegg.jp/kegg-bin/show_pathway?ko05031/K04515%09red/K02677%09red/K11411%09red/K08045%09red/K04560%09red/K00274%09red/K04448%09red/K06269%09red/K04374%09red/K02183%09red/K05197%09red/K09048%09red/K05210%09red/K05213%09red/K09047%09red/K05198%09red/K05199%09red/K04850%09red/K04345%09red/K19662%09red/K04348%09red/K05870%09red/K06268%09red/K04632%09red/
Regulation of actin cytoskeleton	KEGG PATHWAY	ko04810	86	151	2.744061946	1.18E-22	0.0002526	K07861:RAC3|K06591:ITGB8|K08007:EZR|K00889:PIP5K1C,PIP5K1A|K05699:ACTN2,ACTN1|K05692:ACTB|K02085:APC2,APC,94caf6ee-5bd3-4149-b3fb-b9adb3de19ca|K12329:PPP1R12B|K04347:GNG12|K13708:DOCK1,LOC113843992|K04346:GNA12|K05450:PDGFD,PDGFC|K06269:PPP1CB|K05729:ARHGEF6|K02833:HRAS|K06270:PPP1R12A|K05764:LOC113841592|K05767:IQGAP2|K05766:SSH2|K05760:PXN|K05762:RDX|K04514:ROCK1|K04513:RHOA|K13710:ARHGEF7|K173…	https://www.kegg.jp/kegg-bin/show_pathway?ko04810/K07861%09red/K06591%09red/K08007%09red/K00889%09red/K05699%09red/K05692%09red/K02085%09red/K12329%09red/K04347%09red/K13708%09red/K04346%09red/K05450%09red/K06269%09red/K05729%09red/K02833%09red/K06270%09red/K05764%09red/K05767%09red/K05766%09red/K05760%09red/K05762%09red/K04514%09red/K04513%09red/K13710%09red/K17388%09red/K04357%09red/K04359%09re…
Pancreatic cancer	KEGG PATHWAY	ko05212	35	53	3.181739224	1.21E-12	0.000310414	K04692:STAT3|K07861:RAC3|K05448:VEGFA|K11220:STAT1|K02091:CDK6|K06618:RB1|K04357:EGF|K04482:RAD51|K08732:RALGDS|K08773:RALBP1|K08775:BRCA2|K17454:E2F1|K04440:MAPK9,MAPK8|K02649:PIK3R5,PIK3R2,PIK3R1,LOC101795759|K07834:RALA|K09389:29befb83-4d49-48c6-8da4-9559c88e094d,E2F2|K04503:CCND1|K04500:SMAD3,SMAD2|K04501:SMAD4|K00922:PIK3CA,PIK3CB,PIK3CD,PIK3CG|K11217:JAK1|K07827:KRAS|K04388:TGFBR2,dd8fe47f-…	https://www.kegg.jp/kegg-bin/show_pathway?ko05212/K04692%09red/K07861%09red/K05448%09red/K11220%09red/K02091%09red/K06618%09red/K04357%09red/K04482%09red/K08732%09red/K08773%09red/K08775%09red/K17454%09red/K04440%09red/K02649%09red/K07834%09red/K09389%09red/K04503%09red/K04500%09red/K04501%09red/K00922%09red/K11217%09red/K07827%09red/K04388%09red/K07209%09red/K13376%09red/K05729%09red/K04674%09re…
HTLV-I infection	KEGG PATHWAY	ko05166	105	206	2.45580843	3.05E-22	0.000448255	K00182:WNT2|K02678:ETS1,ETS2|K11217:JAK1|K06618:RB1|K04378:SRF|K15310:TP53INP1|K04374:8ddd9e5e-2fd9-47f0-8e91-e094ab22b3c5|K04377:e9e98afd-35da-4c3b-b53e-531ca047a91b|K04376:ELK4|K04503:CCND1|K04500:SMAD3,SMAD2|K04501:SMAD4|K04466:MAP3K14|K02085:APC2,APC,94caf6ee-5bd3-4149-b3fb-b9adb3de19ca|K02324:LOC101790280|K02326:POLE3|K17454:E2F1|K02329:FZD3|K07831:MRAS|K04345:PRKACB|K02375:FZD8,3721d97d-4d4…	https://www.kegg.jp/kegg-bin/show_pathway?ko05166/K00182%09red/K02678%09red/K11217%09red/K06618%09red/K04378%09red/K15310%09red/K04374%09red/K04377%09red/K04376%09red/K04503%09red/K04500%09red/K04501%09red/K04466%09red/K02085%09red/K02324%09red/K02326%09red/K17454%09red/K02329%09red/K07831%09red/K04345%09red/K02375%09red/K04674%09red/K09203%09red/K04348%09red/K04570%09red/K17333%09red/K17332%09re…
RIG-I-like receptor signaling pathway	KEGG PATHWAY	ko04622	25	53	2.272670874	1.49E-05	0.000664051	K02373:FADD|K04416:MAP3K1|K04734:NFKBIA|K12651:AZI2|K12650:TANK|K12653:NLRX1|K09578:PIN1|K12656:SIKE1|K02861:RIPK1|K04441:MAPK12,MAPK14|K04440:MAPK9,MAPK8|K04398:CASP8|K04427:LOC101800996|K04400:LOC101799731|K03173:TRAF2|K03171:TRADD|K12646:DDX58|K03174:TRAF3|K03175:TRAF6|K07209:IKBKB|K11594:DDX3X|K08601:CYLD|K08339:ATG5|K02580:NFKB1|K05410:TBK1	https://www.kegg.jp/kegg-bin/show_pathway?ko04622/K02373%09red/K04416%09red/K04734%09red/K12651%09red/K12650%09red/K12653%09red/K09578%09red/K12656%09red/K02861%09red/K04441%09red/K04440%09red/K04398%09red/K04427%09red/K04400%09red/K03173%09red/K03171%09red/K12646%09red/K03174%09red/K03175%09red/K07209%09red/K11594%09red/K08601%09red/K08339%09red/K02580%09red/K05410%09red/
Chagas disease (American trypanosomiasis)	KEGG PATHWAY	ko05142	34	82	1.997733129	1.58E-05	0.001158655	K02373:FADD|K04430:MAP2K4|K04534:LOC101791437,LOC113844914|K10159:LOC110351185|K04390:FAS|K03175:TRAF6|K01283:ACE|K04398:CASP8|K04354:PPP2R2B,PPP2R2C|K04441:MAPK12,MAPK14|K04440:MAPK9,MAPK8|K05132:IFNGR1|K05133:IFNGR2|K02649:PIK3R5,PIK3R2,PIK3R1,LOC101795759|K04500:SMAD3,SMAD2|K03158:LOC101801004|K04734:NFKBIA|K02580:NFKB1|K00922:PIK3CA,PIK3CB,PIK3CD,PIK3CG|K10160:TLR4|K13377:f2baadea-afef-4d7c-8…	https://www.kegg.jp/kegg-bin/show_pathway?ko05142/K02373%09red/K04430%09red/K04534%09red/K10159%09red/K04390%09red/K03175%09red/K01283%09red/K04398%09red/K04354%09red/K04441%09red/K04440%09red/K05132%09red/K05133%09red/K02649%09red/K04500%09red/K03158%09red/K04734%09red/K02580%09red/K00922%09red/K10160%09red/K13377%09red/K05858%09red/K04388%09red/K07209%09red/K13376%09red/K04674%09red/K04382%09re…
SNARE interactions in vesicular transport	KEGG PATHWAY	ko04130	12	34	1.70049256	0.035532104	0.001174642	K08495:GOSR1|K08496:GOSR2|K08497:BNIP1|K08486:STX2|K08493:VTI1B,VTI1A|K08498:STX6|K08501:STX8|K04560:STX1A|K08504:BET1L|K08508:SNAP23|K08509:SNAP29|K08491:STX17	https://www.kegg.jp/kegg-bin/show_pathway?ko04130/K08495%09red/K08496%09red/K08497%09red/K08486%09red/K08493%09red/K08498%09red/K08501%09red/K04560%09red/K08504%09red/K08508%09red/K08509%09red/K08491%09red/
Salivary secretion	KEGG PATHWAY	ko04970	27	63	2.064883823	5.81E-05	0.001860185	K13899:LOC101796096|K02677:PRKCA|K08042:ADCY2|K04963:RYR3|K08047:ADCY7|K08045:ADCY5|K08049:ADCY9|K10951:SLC12A2|K07376:PRKG1,fda8dece-820b-46c6-a570-bf8ffaebfbcd|K04142:LOC101800857|K02183:LOC101805317,CALM2,CALM1|K01539:ATP1A1|K04936:KCNMA1|K05850:ATP2B2,5f0f6416-49e8-40d5-a6e9-7e3b2c79280e,ATP2B1|K05858:PLCB1,PLCB4,PLCB2|K04345:PRKACB|K05742:SLC9A1|K19662:PRKCB|K04131:CHRM3|K04137:ADRA1D|K04958…	https://www.kegg.jp/kegg-bin/show_pathway?ko04970/K13899%09red/K02677%09red/K08042%09red/K04963%09red/K08047%09red/K08045%09red/K08049%09red/K10951%09red/K07376%09red/K04142%09red/K02183%09red/K01539%09red/K04936%09red/K05850%09red/K05858%09red/K04345%09red/K05742%09red/K19662%09red/K04131%09red/K04137%09red/K04958%09red/K01540%09red/K12318%09red/K12319%09red/K04632%09red/K04141%09red/K04634%09re…
MAPK signaling pathway	KEGG PATHWAY	ko04010	99	191	2.497320226	9.82E-22	0.002219837	K07861:RAC3|K20216:DUSP10|K04378:SRF|K04373:RPS6KA6,RPS6KA2,RPS6KA3|K04372:MKNK2|K04374:8ddd9e5e-2fd9-47f0-8e91-e094ab22b3c5|K04377:e9e98afd-35da-4c3b-b53e-531ca047a91b|K04376:ELK4|K04461:PPM1B|K04462:MECOM|K04466:MAP3K14|K04345:PRKACB|K04346:GNA12|K04347:GNG12|K04674:TGFBR1|K04348:PPP3CA,PPP3CB|K02833:HRAS|K17333:NFATC3|K04352:LOC101791380|K04357:EGF|K04359:PDGFA|K04358:FGF12,FGF16,FGF13,FGF7,FG…	https://www.kegg.jp/kegg-bin/show_pathway?ko04010/K07861%09red/K20216%09red/K04378%09red/K04373%09red/K04372%09red/K04374%09red/K04377%09red/K04376%09red/K04461%09red/K04462%09red/K04466%09red/K04345%09red/K04346%09red/K04347%09red/K04674%09red/K04348%09red/K02833%09red/K17333%09red/K04352%09red/K04357%09red/K04359%09red/K04358%09red/K17386%09red/K06268%09red/K13376%09red/K08052%09red/K04454%09re…
Prostate cancer	KEGG PATHWAY	ko05215	44	70	3.028496274	2.20E-14	0.002536553	K07203:MTOR|K01110:PTEN|K03083:GSK3B|K04491:TCF7L2|K03099:SOS1,SOS2|K06618:RB1|K09487:HSP90B1|K04357:EGF|K04359:PDGFA|K17386:PDGFB|K17454:E2F1|K02620:TCF7|K04374:8ddd9e5e-2fd9-47f0-8e91-e094ab22b3c5|K02649:PIK3R5,PIK3R2,PIK3R1,LOC101795759|K02105:CTNNB1|K09389:29befb83-4d49-48c6-8da4-9559c88e094d,E2F2|K09048:CREB3,CREB3L2,CREB3L1|K04503:CCND1|K09047:CREB5|K04361:EGFR|K02580:NFKB1|K00922:PIK3CA,PI…	https://www.kegg.jp/kegg-bin/show_pathway?ko05215/K07203%09red/K01110%09red/K03083%09red/K04491%09red/K03099%09red/K06618%09red/K09487%09red/K04357%09red/K04359%09red/K17386%09red/K17454%09red/K02620%09red/K04374%09red/K02649%09red/K02105%09red/K09389%09red/K09048%09red/K04503%09red/K09047%09red/K04361%09red/K02580%09red/K00922%09red/K06624%09red/K02161%09red/K07827%09red/K07209%09red/K05450%09re…
Regulation of lipolysis in adipocytes	KEGG PATHWAY	ko04923	19	45	2.034292951	0.000885803	0.002724174	K08042:ADCY2|K08047:ADCY7|K08045:ADCY5|K04527:INSR|K05251:TSHB|K07187:IRS4,IRS2|K08049:ADCY9|K04456:AKT3,AKT1|K16172:IRS1|K04345:PRKACB|K13296:e6ab3f9e-964b-4bae-86fb-10b89616bc6e,PDE3B|K00922:PIK3CA,PIK3CB,PIK3CD,PIK3CG|K07376:PRKG1,fda8dece-820b-46c6-a570-bf8ffaebfbcd|K01054:MGLL|K04630:GNAI3|K04632:GNAS|K04142:LOC101800857|K02649:PIK3R5,PIK3R2,PIK3R1,LOC101795759|K04141:ADRB1	https://www.kegg.jp/kegg-bin/show_pathway?ko04923/K08042%09red/K08047%09red/K08045%09red/K04527%09red/K05251%09red/K07187%09red/K08049%09red/K04456%09red/K16172%09red/K04345%09red/K13296%09red/K00922%09red/K07376%09red/K01054%09red/K04630%09red/K04632%09red/K04142%09red/K02649%09red/K04141%09red/
Axon guidance	KEGG PATHWAY	ko04360	83	121	3.304951794	5.32E-30	0.002733266	K04410:PAK2|K06845:LOC101795858,NTN4|K06841:SEMA5A,SEMA5B|K06840:LOC101805082,a1c749f3-748f-44d6-8ade-5a92e9d3e107,SEMA3C,SEMA3A,SEMA3D|K04513:RHOA|K06842:SEMA6D,SEMA6B,69c8d183-386f-4156-8b34-9323bc06bea6,SEMA6A|K06225:PTCH1|K07861:RAC3|K04515:LOC113845138,CAMK2G|K05746:ENAH|K01116:PLCG1,LOC101792010|K03083:GSK3B|K04671:BMPR2|K07523:LRRC4C|K07532:ARHGEF12|K02329:FZD3|K06724:NRP1|K05704:SRC|K1003…	https://www.kegg.jp/kegg-bin/show_pathway?ko04360/K04410%09red/K06845%09red/K06841%09red/K06840%09red/K04513%09red/K06842%09red/K06225%09red/K07861%09red/K04515%09red/K05746%09red/K01116%09red/K03083%09red/K04671%09red/K07523%09red/K07532%09red/K02329%09red/K06724%09red/K05704%09red/K10031%09red/K17388%09red/K05733%09red/K05099%09red/K04964%09red/K06843%09red/K04514%09red/K06839%09red/K13578%09re…
Hippo signaling pathway	KEGG PATHWAY	ko04390	79	109	3.491990074	2.94E-31	0.003980021	K06091:MPP5|K16197:YWHAB,YWHAZ,YWHAQ|K04412:STK3|K19631:SMAD7,LOC110352107|K00182:WNT2|K10151:CCND2|K08791:LATS2,3e6cb00b-71cd-4489-9df1-e8d01ebfd0c2,LATS1|K01384:WNT11|K08959:CSNK1D|K02842:FZD10,FZD9|K03083:GSK3B|K16198:YWHAH,YWHAG|K05706:SNAI1,SNAI2|K16819:AMOT|K02235:FZD2|K02157:AXIN1|K02353:DVL3,DVL1|K02354:FZD4|K02376:FZD6|K09448:TEAD3,TEAD1|K04237:PARD3|K02375:FZD8,3721d97d-4d42-486a-8ab2-8…	https://www.kegg.jp/kegg-bin/show_pathway?ko04390/K06091%09red/K16197%09red/K04412%09red/K19631%09red/K00182%09red/K10151%09red/K08791%09red/K01384%09red/K08959%09red/K02842%09red/K03083%09red/K16198%09red/K05706%09red/K16819%09red/K02235%09red/K02157%09red/K02353%09red/K02354%09red/K02376%09red/K09448%09red/K04237%09red/K02375%09red/K04354%09red/K04663%09red/K04662%09red/K00408%09red/K04491%09re…
GnRH signaling pathway	KEGG PATHWAY	ko04912	35	63	2.676701252	1.29E-09	0.004622713	K04515:LOC113845138,CAMK2G|K04416:MAP3K1|K02677:PRKCA|K01115:PLD1,e52d0119-c13a-4e50-baa5-40ad0b36e494|K03099:SOS1,SOS2|K08523:HBEGF|K08042:ADCY2|K08047:ADCY7|K04430:MAP2K4|K08045:ADCY5|K08049:ADCY9|K16342:PLA2G4B|K04441:MAPK12,MAPK14|K04440:MAPK9,MAPK8|K04448:JUN|K04374:8ddd9e5e-2fd9-47f0-8e91-e094ab22b3c5|K02183:LOC101805317,CALM2,CALM1|K04421:MAP3K3,LOC101795869|K01398:MMP2|K04428:MAP3K4|K0585…	https://www.kegg.jp/kegg-bin/show_pathway?ko04912/K04515%09red/K04416%09red/K02677%09red/K01115%09red/K03099%09red/K08523%09red/K08042%09red/K08047%09red/K04430%09red/K08045%09red/K08049%09red/K16342%09red/K04441%09red/K04440%09red/K04448%09red/K04374%09red/K02183%09red/K04421%09red/K01398%09red/K04428%09red/K05858%09red/K04850%09red/K04345%09red/K07827%09red/K19662%09red/K04366%09red/K04857%09re…
Acute myeloid leukemia	KEGG PATHWAY	ko05221	29	45	3.104973452	2.57E-10	0.006430834	K04692:STAT3|K09055:CEBPA|K10053:CBFA2T3,RUNX1T1|K10054:LOC101796105,PML|K10056:JUP|K05091:KIT|K02620:TCF7|K04702:PIM1|K02649:PIK3R5,PIK3R2,PIK3R1,LOC101795759|K04504:PPARD|K03099:SOS1,SOS2|K04503:CCND1|K04688:RPS6KB1|K04490:TCF7L1|K00922:PIK3CA,PIK3CB,PIK3CD,PIK3CG|K09438:SPI1|K07209:IKBKB|K07203:MTOR|K07205:EIF4EBP1|K04456:AKT3,AKT1|K02833:HRAS|K04377:e9e98afd-35da-4c3b-b53e-531ca047a91b|K02580…	https://www.kegg.jp/kegg-bin/show_pathway?ko05221/K04692%09red/K09055%09red/K10053%09red/K10054%09red/K10056%09red/K05091%09red/K02620%09red/K04702%09red/K02649%09red/K04504%09red/K03099%09red/K04503%09red/K04688%09red/K04490%09red/K00922%09red/K09438%09red/K07209%09red/K07203%09red/K07205%09red/K04456%09red/K02833%09red/K04377%09red/K02580%09red/K04491%09red/K04492%09red/K07827%09red/K04366%09re…
HIF-1 signaling pathway	KEGG PATHWAY	ko04066	39	71	2.646541238	2.32E-10	0.00647984	K04515:LOC113845138,CAMK2G|K05087:IGF1R,a00f0252-04ca-4c37-b932-f1fdc0be18f9|K04692:STAT3|K02677:PRKCA|K01116:PLCG1,LOC101792010|K09592:EGLN1,EGLN3|K04357:EGF|K09097:ARNT|K03870:CUL2|K00844:LOC101794107,LOC101794283|K05448:VEGFA|K05096:LOC101797327,FLT1|K07299:SLC2A1|K08008:LOC101792171|K05132:IFNGR1|K04372:MKNK2|K02649:PIK3R5,PIK3R2,PIK3R1,LOC101795759|K05465:ANGPT1|K04527:INSR|K04688:RPS6KB1|K0…	https://www.kegg.jp/kegg-bin/show_pathway?ko04066/K04515%09red/K05087%09red/K04692%09red/K02677%09red/K01116%09red/K09592%09red/K04357%09red/K09097%09red/K03870%09red/K00844%09red/K05448%09red/K05096%09red/K07299%09red/K08008%09red/K05132%09red/K04372%09red/K02649%09red/K05465%09red/K04527%09red/K04688%09red/K00922%09red/K03259%09red/K02161%09red/K10160%09red/K05859%09red/K05133%09red/K03868%09re…
mRNA surveillance pathway	KEGG PATHWAY	ko03015	39	59	3.184820812	5.88E-14	0.00837515	K08873:SMG1|K03267:GSPT1|K14328:UPF3B,UPF3A|K00565:RNMT|K14327:UPF2|K14326:UPF1|K11124:SMG6|K11125:SMG5|K04354:PPP2R2B,PPP2R2C|K11584:PPP2R5A,PPP2R5D,PPP2R5E,PPP2R5C|K12882:NCBP1|K12883:LOC113844723,LOC101798009|K14325:RNPS1|K13025:EIF4A3|K15542:SFT2D3,WDR33|K11583:PPP2R3A,PPP2R3B|K14411:MSI1,MSI2,DAZAP1|K13126:PABPC4,PABPC1|K14285:NXT2|K14962:WDR82|K13917:LOC101797459|K06269:PPP1CB|K13114:PNN|K1…	https://www.kegg.jp/kegg-bin/show_pathway?ko03015/K08873%09red/K03267%09red/K14328%09red/K00565%09red/K14327%09red/K14326%09red/K11124%09red/K11125%09red/K04354%09red/K11584%09red/K12882%09red/K12883%09red/K14325%09red/K13025%09red/K15542%09red/K11583%09red/K14411%09red/K13126%09red/K14285%09red/K14962%09red/K13917%09red/K06269%09red/K13114%09red/K14402%09red/K14416%09red/K15544%09red/K04382%09re…
Proteoglycans in cancer	KEGG PATHWAY	ko05205	100	162	2.974112502	4.08E-30	0.008510997	K16336:SDC2|K05717:FN1|K00182:WNT2|K01365:CTSL|K01116:PLCG1,LOC101792010|K16338:SDC4|K05860:PLCE1|K05448:VEGFA|K08007:EZR|K04377:e9e98afd-35da-4c3b-b53e-531ca047a91b|K04503:CCND1|K05692:ACTB|K02329:FZD3|K07831:MRAS|K05859:PLCG2|K04345:PRKACB|K12959:CAV3|K07293:LOC101789439|K02833:HRAS|K06270:PPP1R12A|K05760:PXN|K05762:RDX|K04515:LOC113845138,CAMK2G|K04514:ROCK1|K05087:IGF1R,a00f0252-04ca-4c37-b93…	https://www.kegg.jp/kegg-bin/show_pathway?ko05205/K16336%09red/K05717%09red/K00182%09red/K01365%09red/K01116%09red/K16338%09red/K05860%09red/K05448%09red/K08007%09red/K04377%09red/K04503%09red/K05692%09red/K02329%09red/K07831%09red/K05859%09red/K04345%09red/K12959%09red/K07293%09red/K02833%09red/K06270%09red/K05760%09red/K05762%09red/K04515%09red/K04514%09red/K05087%09red/K04692%09red/K04513%09re…
T cell receptor signaling pathway	KEGG PATHWAY	ko04660	34	85	1.927224901	3.88E-05	0.010817641	K04410:PAK2|K04513:RHOA|K01116:PLCG1,LOC101792010|K03083:GSK3B|K05733:PAK3|K05730:VAV2,VAV3|K05736:PAK5|K04441:MAPK12,MAPK14|K04707:a9896c52-0482-44eb-b8bb-298e5bb6d323,CBLB|K04446:NFATC1|K04448:JUN|K06268:PPP3R1|K02649:PIK3R5,PIK3R2,PIK3R1,LOC101795759|K04427:LOC101800996|K03099:SOS1,SOS2|K12076:DLG1|K07367:CARD11|K00922:PIK3CA,PIK3CB,PIK3CD,PIK3CG|K07361:LCP2|K04466:MAP3K14|K07369:MALT1|K07209:…	https://www.kegg.jp/kegg-bin/show_pathway?ko04660/K04410%09red/K04513%09red/K01116%09red/K03083%09red/K05733%09red/K05730%09red/K05736%09red/K04441%09red/K04707%09red/K04446%09red/K04448%09red/K06268%09red/K02649%09red/K04427%09red/K03099%09red/K12076%09red/K07367%09red/K00922%09red/K07361%09red/K04466%09red/K07369%09red/K07209%09red/K05703%09red/K19862%09red/K04734%09red/K04348%09red/K04456%09re…
Chemokine signaling pathway	KEGG PATHWAY	ko04062	58	146	1.914024731	1.12E-07	0.012237093	K04514:ROCK1|K04692:STAT3|K04513:RHOA|K04538:GNB4|K04536:GNB1|K11220:STAT1|K03083:GSK3B|K04438:CRKL,CRK|K09408:FOXO3|K00910:GRK2|K10033:CXCL14|K10031:CXCL12|K17388:ROCK2|K08042:ADCY2|K05730:VAV2,VAV3|K04237:PARD3|K08047:ADCY7|K08045:ADCY5|K08049:ADCY9|K05508:CX3CL1|K04447:JAK2|K04345:PRKACB|K05858:PLCB1,PLCB4,PLCB2|K07836:RAP1B|K02649:PIK3R5,PIK3R2,PIK3R1,LOC101795759|K03099:SOS1,SOS2|K04365:BRAF…	https://www.kegg.jp/kegg-bin/show_pathway?ko04062/K04514%09red/K04692%09red/K04513%09red/K04538%09red/K04536%09red/K11220%09red/K03083%09red/K04438%09red/K09408%09red/K00910%09red/K10033%09red/K10031%09red/K17388%09red/K08042%09red/K05730%09red/K04237%09red/K08047%09red/K08045%09red/K08049%09red/K05508%09red/K04447%09red/K04345%09red/K05858%09red/K07836%09red/K02649%09red/K03099%09red/K04365%09re…
Bile secretion	KEGG PATHWAY	ko04976	18	59	1.469917298	0.049947975	0.013626836	K08042:ADCY2|K14349:NCEH1|K05742:SLC9A1|K08045:ADCY5|K01539:ATP1A1|K05031:CFTR|K08049:ADCY9|K04345:PRKACB|K01540:ATP1B3,ATP1B1|K09864:AQP1|K07299:SLC2A1|K08524:RXRA,c1d0c671-20aa-4705-8c5b-b54c1ca490b3|K08047:ADCY7|K04632:GNAS|K00021:HMGCR|K13575:SLC4A4|K09877:AQP9|K04943:KCNN2,ee217de9-8b42-49b8-9d9c-cbdcd6797f5c	https://www.kegg.jp/kegg-bin/show_pathway?ko04976/K08042%09red/K14349%09red/K05742%09red/K08045%09red/K01539%09red/K05031%09red/K08049%09red/K04345%09red/K01540%09red/K09864%09red/K07299%09red/K08524%09red/K08047%09red/K04632%09red/K00021%09red/K13575%09red/K09877%09red/K04943%09red/
Fc epsilon RI signaling pathway	KEGG PATHWAY	ko04664	22	45	2.355497102	2.38E-05	0.013845741	K04430:MAP2K4|K07861:RAC3|K03084:INPP5D|K01116:PLCG1,LOC101792010|K05730:VAV2,VAV3|K07370:BTK|K16342:PLA2G4B|K04441:MAPK12,MAPK14|K04440:MAPK9,MAPK8|K02677:PRKCA|K02649:PIK3R5,PIK3R2,PIK3R1,LOC101795759|K03099:SOS1,SOS2|K00922:PIK3CA,PIK3CB,PIK3CD,PIK3CG|K05854:LYN|K07361:LCP2|K05859:PLCG2|K05703:FYN|K04456:AKT3,AKT1|K02833:HRAS|K07827:KRAS|K04366:RAF1|K04364:GRB2	https://www.kegg.jp/kegg-bin/show_pathway?ko04664/K04430%09red/K07861%09red/K03084%09red/K01116%09red/K05730%09red/K07370%09red/K16342%09red/K04441%09red/K04440%09red/K02677%09red/K02649%09red/K03099%09red/K00922%09red/K05854%09red/K07361%09red/K05859%09red/K05703%09red/K04456%09red/K02833%09red/K07827%09red/K04366%09red/K04364%09red/
Alcoholism	KEGG PATHWAY	ko05034	41	83	2.380006655	5.56E-09	0.023330206	K11418:HDAC11|K04538:GNB4|K04536:GNB1|K04534:LOC101791437,LOC113844914|K06067:HDAC2|K03099:SOS1,SOS2|K04632:GNAS|K05210:GRIN2B|K08045:ADCY5|K07359:CAMKK2,CAMKK1|K11253:LOC101790011|K07826:GNG2|K06269:PPP1CB|K15985:PKIA|K02183:LOC101805317,CALM2,CALM1|K11409:HDAC9|K11408:HDAC7|K09048:CREB3,CREB3L2,CREB3L1|K11251:LOC101801533,LOC101795967,LOC113839842,LOC101797202|K05213:GRIN3A|K04365:BRAF|K04543:G…	https://www.kegg.jp/kegg-bin/show_pathway?ko05034/K11418%09red/K04538%09red/K04536%09red/K04534%09red/K06067%09red/K03099%09red/K04632%09red/K05210%09red/K08045%09red/K07359%09red/K11253%09red/K07826%09red/K06269%09red/K15985%09red/K02183%09red/K11409%09red/K11408%09red/K09048%09red/K11251%09red/K05213%09red/K04365%09red/K04543%09red/K09047%09red/K04546%09red/K11404%09red/K11406%09red/K04267%09re…
Amyotrophic lateral sclerosis (ALS)	KEGG PATHWAY	ko05014	17	43	1.904815309	0.003766495	0.050575403	K05197:GRIA1|K05210:GRIN2B|K11519:DERL1|K04348:PPP3CA,PPP3CB|K02161:BCL2|K03158:LOC101801004|K08738:LOC113841161,CYC|K01370:LOC101789899|K06268:PPP3R1|K04565:SOD1|K04441:MAPK12,MAPK14|K04570:BCL2L1|K05198:GRIA2|K04575:ALS2|K04574:NEFH|K02187:CASP3|K07887:RAB5A	https://www.kegg.jp/kegg-bin/show_pathway?ko05014/K05197%09red/K05210%09red/K11519%09red/K04348%09red/K02161%09red/K03158%09red/K08738%09red/K01370%09red/K06268%09red/K04565%09red/K04441%09red/K04570%09red/K05198%09red/K04575%09red/K04574%09red/K02187%09red/K07887%09red/
Bladder cancer	KEGG PATHWAY	ko05219	21	38	2.662613351	3.00E-06	0.053761087	K06618:RB1|K09389:29befb83-4d49-48c6-8da4-9559c88e094d,E2F2|K09850:RASSF1|K08803:DAPK2,DAPK3,DAPK1,47361e6b-12b7-41e5-bde7-b846fdb2e8fb|K04445:RPS6KA5|K04365:BRAF|K06643:MDM2|K05448:VEGFA|K01398:MMP2|K04503:CCND1|K05704:SRC|K17454:E2F1|K16857:THBS1|K02833:HRAS|K05094:FGFR3|K07827:KRAS|K04357:EGF|K04361:EGFR|K04366:RAF1|K04377:e9e98afd-35da-4c3b-b53e-531ca047a91b|K08523:HBEGF	https://www.kegg.jp/kegg-bin/show_pathway?ko05219/K06618%09red/K09389%09red/K09850%09red/K08803%09red/K04445%09red/K04365%09red/K06643%09red/K05448%09red/K01398%09red/K04503%09red/K05704%09red/K17454%09red/K16857%09red/K02833%09red/K05094%09red/K07827%09red/K04357%09red/K04361%09red/K04366%09red/K04377%09red/K08523%09red/
Endocrine resistance	KEGG PATHWAY	ko01522	43	73	2.83803667	1.11E-12	0.056056569	K05087:IGF1R,a00f0252-04ca-4c37-b932-f1fdc0be18f9|K06622:CDKN2C|K09389:29befb83-4d49-48c6-8da4-9559c88e094d,E2F2|K06051:DLL1,DLL4|K08523:HBEGF|K06618:RB1|K08047:ADCY7|K08045:ADCY5|K08049:ADCY9|K02599:NOTCH1,3f50d37a-8ae7-4dd6-bf24-eb637056bec5,NOTCH2,bc350cc2-5988-4ae1-944d-1db3e93c8ced|K17454:E2F1|K04441:MAPK12,MAPK14|K04440:MAPK9,MAPK8|K04448:JUN|K02649:PIK3R5,PIK3R2,PIK3R1,LOC101795759|K11256:…	https://www.kegg.jp/kegg-bin/show_pathway?ko01522/K05087%09red/K06622%09red/K09389%09red/K06051%09red/K08523%09red/K06618%09red/K08047%09red/K08045%09red/K08049%09red/K02599%09red/K17454%09red/K04441%09red/K04440%09red/K04448%09red/K02649%09red/K11256%09red/K03099%09red/K04503%09red/K08042%09red/K01398%09red/K04688%09red/K00922%09red/K02161%09red/K15144%09red/K04632%09red/K04345%09red/K04650%09re…
Ribosome	KEGG PATHWAY	ko03010	42	143	1.415095207	0.008861661	0.084994935	K02907:MRPL30|K02878:MRPL16|K02957:RPS15A|K02956:MRPS15|K02932:RPL5|K02935:MRPL12|K02888:MRPL21|K02951:RPS12|K02913:MRPL33|K02912:RPL32|K02887:MRPL20|K02911:MRPL32|K02880:LOC101799070|K02992:MRPS7|K02990:MRPS6|K02996:MRPS9|K02975:RPS25|K02974:RPS24|K02938:RPL8|K02954:MRPS14|K02899:MRPL27|K02889:RPL21|K02875:RPL14|K02876:MRPL15|K02921:RPL37A|K02898:RPL26L1|K02873:RPL13|K02896:RSL24D1|K02905:RPL29|…	https://www.kegg.jp/kegg-bin/show_pathway?ko03010/K02907%09red/K02878%09red/K02957%09red/K02956%09red/K02932%09red/K02935%09red/K02888%09red/K02951%09red/K02913%09red/K02912%09red/K02887%09red/K02911%09red/K02880%09red/K02992%09red/K02990%09red/K02996%09red/K02975%09red/K02974%09red/K02938%09red/K02954%09red/K02899%09red/K02889%09red/K02875%09red/K02876%09red/K02921%09red/K02898%09red/K02873%09re…
Epstein-Barr virus infection	KEGG PATHWAY	ko05169	90	164	2.644058554	4.11E-22	0.0856251	K10591:NEDD4|K03065:PSMC3|K11217:JAK1|K01116:PLCG1,LOC101792010|K03022:POLR3H|K03024:POLR3G|K03025:POLR3F|K03026:POLR3D|K03027:POLR1C|K03028:PSMD2|K03062:PSMC1|K06618:RB1|K04377:e9e98afd-35da-4c3b-b53e-531ca047a91b|K01510:ENTPD3,ENTPD1|K04466:MAP3K14|K03136:GTF2E1|K03137:GTF2E2|K05854:LYN|K03039:PSMD13|K03038:PSMD7|K03037:PSMD6|K03035:PSMD12|K12646:DDX58|K03032:PSMD1|K05859:PLCG2|K03030:PSMD14|K0…	https://www.kegg.jp/kegg-bin/show_pathway?ko05169/K10591%09red/K03065%09red/K11217%09red/K01116%09red/K03022%09red/K03024%09red/K03025%09red/K03026%09red/K03027%09red/K03028%09red/K03062%09red/K06618%09red/K04377%09red/K01510%09red/K04466%09red/K03136%09red/K03137%09red/K05854%09red/K03039%09red/K03038%09red/K03037%09red/K03035%09red/K12646%09red/K03032%09red/K05859%09red/K03030%09red/K04345%09re…
Non-homologous end-joining	KEGG PATHWAY	ko03450	8	19	2.028657791	0.028599186	0.087780613	K10886:XRCC4|K10887:DCLRE1C|K04799:FEN1|K00977:DNTT|K06642:PRKDC|K10866:RAD50|K10865:MRE11|K03512:POLL	https://www.kegg.jp/kegg-bin/show_pathway?ko03450/K10886%09red/K10887%09red/K04799%09red/K00977%09red/K06642%09red/K10866%09red/K10865%09red/K03512%09red/
Measles	KEGG PATHWAY	ko05162	40	109	1.76809624	8.62E-05	0.097948815	K16196:EIF2AK4|K16194:EIF2AK1|K04692:STAT3|K10151:CCND2|K04390:FAS|K03083:GSK3B|K11220:STAT1|K02091:CDK6|K12968:ADAR|K04404:TAB2|K03175:TRAF6|K04447:JAK2|K05130:IFNAR1|K05131:IFNAR2|K05132:IFNGR1|K05133:IFNGR2|K02649:PIK3R5,PIK3R2,PIK3R1,LOC101795759|K08860:EIF2AK3|K04427:LOC101800996|K10148:TP73|K04734:NFKBIA|K04503:CCND1|K03097:CSNK2A1|K04721:TNFSF10|K10159:LOC110351185|K07899:RAB9A|K02580:NFKB…	https://www.kegg.jp/kegg-bin/show_pathway?ko05162/K16196%09red/K16194%09red/K04692%09red/K10151%09red/K04390%09red/K03083%09red/K11220%09red/K02091%09red/K12968%09red/K04404%09red/K03175%09red/K04447%09red/K05130%09red/K05131%09red/K05132%09red/K05133%09red/K02649%09red/K08860%09red/K04427%09red/K10148%09red/K04734%09red/K04503%09red/K03097%09red/K04721%09red/K10159%09red/K07899%09red/K02580%09re…
Phagosome	KEGG PATHWAY	ko04145	38	95	1.927224901	1.39E-05	0.106519024	K01365:CTSL|K10159:LOC110351185|K16857:THBS1|K07888:LOC113840038|K02155:ATP6V0C|K02152:ATP6V1G1|K02150:ATP6V1E1|K07887:RAB5A|K05719:ITGB1|K10956:SEC61A1|K07374:LOC101797289,LOC101804924,LOC101802038|K07375:TUBB3,TUBB4B,TUBB6,LOC101802187,7e46c545-31b3-4dc9-b54c-dd92d2947210|K12478:EEA1|K01330:C1R|K08008:LOC101792171|K10066:COLEC11|K10062:COLEC12|K10089:M6PR|K05692:ACTB|K10068:MBL|K00921:PIKFYVE|K…	https://www.kegg.jp/kegg-bin/show_pathway?ko04145/K01365%09red/K10159%09red/K16857%09red/K07888%09red/K02155%09red/K02152%09red/K02150%09red/K07887%09red/K05719%09red/K10956%09red/K07374%09red/K07375%09red/K12478%09red/K01330%09red/K08008%09red/K10066%09red/K10062%09red/K10089%09red/K05692%09red/K10068%09red/K00921%09red/K13813%09red/K02146%09red/K10160%09red/K07897%09red/K08054%09red/K06528%09re…
Prolactin signaling pathway	KEGG PATHWAY	ko04917	30	57	2.535822239	1.01E-07	0.111867475	K04697:SOCS4|K04694:SOCS1|K04695:SOCS2|K04692:STAT3|K10151:CCND2|K03083:GSK3B|K04698:SOCS5|K04699:SOCS6|K09408:FOXO3|K11220:STAT1|K09444:IRF1|K04441:MAPK12,MAPK14|K04440:MAPK9,MAPK8|K04447:JAK2|K02649:PIK3R5,PIK3R2,PIK3R1,LOC101795759|K03099:SOS1,SOS2|K04503:CCND1|K00922:PIK3CA,PIK3CB,PIK3CD,PIK3CG|K05147:TNFRSF11A|K05081:bef8fa78-c9af-4cd7-b583-113b96fdb6c8|K05704:SRC|K04456:AKT3,AKT1|K02833:HRA…	https://www.kegg.jp/kegg-bin/show_pathway?ko04917/K04697%09red/K04694%09red/K04695%09red/K04692%09red/K10151%09red/K03083%09red/K04698%09red/K04699%09red/K09408%09red/K11220%09red/K09444%09red/K04441%09red/K04440%09red/K04447%09red/K02649%09red/K03099%09red/K04503%09red/K00922%09red/K05147%09red/K05081%09red/K05704%09red/K04456%09red/K02833%09red/K17447%09red/K02580%09red/K17449%09red/K07827%09re…
Signaling pathways regulating pluripotency of stem cells	KEGG PATHWAY	ko04550	66	108	2.944371377	5.95E-20	0.129106423	K04692:STAT3|K02376:FZD6|K02375:FZD8,3721d97d-4d42-486a-8ab2-82b764f0bffd,FZD5|K01384:WNT11|K11478:JARID2|K04377:e9e98afd-35da-4c3b-b53e-531ca047a91b|K03083:GSK3B|K11459:BMI1|K11305:KAT6A|K05095:FGFR4|K13596:ACVR2B|K02157:AXIN1|K00182:WNT2|K02353:DVL3,DVL1|K05094:FGFR3|K02354:FZD4|K14439:SMARCAD1|K04673:BMPR1A|K04662:BMP2,BMP4|K02105:CTNNB1|K00408:WNT4|K04667:INHBA|K11421:SETDB1|K09378:ZFHX3|K101…	https://www.kegg.jp/kegg-bin/show_pathway?ko04550/K04692%09red/K02376%09red/K02375%09red/K01384%09red/K11478%09red/K04377%09red/K03083%09red/K11459%09red/K11305%09red/K05095%09red/K13596%09red/K02157%09red/K00182%09red/K02353%09red/K05094%09red/K02354%09red/K14439%09red/K04673%09red/K04662%09red/K02105%09red/K00408%09red/K04667%09red/K11421%09red/K09378%09red/K10177%09red/K04441%09red/K02833%09re…
Hippo signaling pathway - fly	KEGG PATHWAY	ko04391	30	52	2.7796513	5.86E-09	0.140746602	K16197:YWHAB,YWHAZ,YWHAQ|K04412:STK3|K08791:LATS2,3e6cb00b-71cd-4489-9df1-e8d01ebfd0c2,LATS1|K09236:TSHZ3,TSHZ2,TSHZ1|K09448:TEAD3,TEAD1|K04237:PARD3|K04354:PPP2R2B,PPP2R2C|K16669:FAT4|K04440:MAPK9,MAPK8|K04377:e9e98afd-35da-4c3b-b53e-531ca047a91b|K06630:YWHAE|K16682:WTIP,LIMD1|K05692:ACTB|K16686:SAV1|K16687:YAP1|K16684:NF2,LOC101791895|K12076:DLG1|K06091:MPP5|K16685:WWC1|K16675:ZDHHC9,ZDHHC14|K1…	https://www.kegg.jp/kegg-bin/show_pathway?ko04391/K16197%09red/K04412%09red/K08791%09red/K09236%09red/K09448%09red/K04237%09red/K04354%09red/K16669%09red/K04440%09red/K04377%09red/K06630%09red/K16682%09red/K05692%09red/K16686%09red/K16687%09red/K16684%09red/K12076%09red/K06091%09red/K16685%09red/K16675%09red/K16674%09red/K05628%09red/K16175%09red/K04382%09red/K06094%09red/K06093%09red/K06626%09re…
Olfactory transduction	KEGG PATHWAY	ko04740	14	25	2.698114862	0.000114332	0.140746602	K04515:LOC113845138,CAMK2G|K05849:SLC8A1,SLC8A3|K18283:LOC113844815|K19695:NCALD|K04543:GNG7|K07376:PRKG1,fda8dece-820b-46c6-a570-bf8ffaebfbcd|K04949:FATE1|K18154:RGS2|K00910:GRK2|K04536:GNB1|K04345:PRKACB|K04633:GNAL|K13755:PDE1C,PDE1A|K02183:LOC101805317,CALM2,CALM1	https://www.kegg.jp/kegg-bin/show_pathway?ko04740/K04515%09red/K05849%09red/K18283%09red/K19695%09red/K04543%09red/K07376%09red/K04949%09red/K18154%09red/K00910%09red/K04536%09red/K04345%09red/K04633%09red/K13755%09red/K02183%09red/
Circadian entrainment	KEGG PATHWAY	ko04713	39	76	2.472426683	3.25E-09	0.144567059	K04515:LOC113845138,CAMK2G|K04538:GNB4|K02677:PRKCA|K04534:LOC101791437,LOC113844914|K07843:RASD1|K05870:CREB1|K08042:ADCY2|K04963:RYR3|K08047:ADCY7|K08045:ADCY5|K08049:ADCY9|K07376:PRKG1,fda8dece-820b-46c6-a570-bf8ffaebfbcd|K04445:RPS6KA5|K04536:GNB1|K05000:KCNJ6|K02183:LOC101805317,CALM2,CALM1|K05197:GRIA1|K05210:GRIN2B|K04997:KCNJ3|K04543:GNG7|K04546:LOC101794407|K05198:GRIA2|K05199:GRIA3|K165…	https://www.kegg.jp/kegg-bin/show_pathway?ko04713/K04515%09red/K04538%09red/K02677%09red/K04534%09red/K07843%09red/K05870%09red/K08042%09red/K04963%09red/K08047%09red/K08045%09red/K08049%09red/K07376%09red/K04445%09red/K04536%09red/K05000%09red/K02183%09red/K05197%09red/K05210%09red/K04997%09red/K04543%09red/K04546%09red/K05198%09red/K05199%09red/K16513%09red/K07826%09red/K05858%09red/K04850%09re…
Glycosphingolipid biosynthesis - lacto and neolacto series	KEGG PATHWAY	ko00601	11	25	2.119947391	0.007376154	0.144567059	K03792:ST3GAL6|K07632:FUT4|K07969:B4GALT4|K07966:B4GALT1|K03877:SH3BGR|K00741:B3GNT2|K07971:B3GNT4|K00781:ST3GAL3|K07819:B3GALT1|K03371:ST8SIA1|K03494:ST3GAL4	https://www.kegg.jp/kegg-bin/show_pathway?ko00601/K03792%09red/K07632%09red/K07969%09red/K07966%09red/K03877%09red/K00741%09red/K07971%09red/K00781%09red/K07819%09red/K03371%09red/K03494%09red/
Cholinergic synapse	KEGG PATHWAY	ko04725	44	88	2.409031127	9.44E-10	0.163227984	K04515:LOC113845138,CAMK2G|K04538:GNB4|K02677:PRKCA|K04534:LOC101791437,LOC113844914|K05870:CREB1|K04133:CHRM5|K04806:CHRNA4|K02161:BCL2|K04929:KCNQ4|K08042:ADCY2|K08047:ADCY7|K08045:ADCY5|K08049:ADCY9|K04447:JAK2|K04536:GNB1|K04374:8ddd9e5e-2fd9-47f0-8e91-e094ab22b3c5|K02649:PIK3R5,PIK3R2,PIK3R1,LOC101795759|K09048:CREB3,CREB3L2,CREB3L1|K04997:KCNJ3|K04543:GNG7|K09047:CREB5|K04546:LOC101794407|K…	https://www.kegg.jp/kegg-bin/show_pathway?ko04725/K04515%09red/K04538%09red/K02677%09red/K04534%09red/K05870%09red/K04133%09red/K04806%09red/K02161%09red/K04929%09red/K08042%09red/K08047%09red/K08045%09red/K08049%09red/K04447%09red/K04536%09red/K04374%09red/K02649%09red/K09048%09red/K04997%09red/K04543%09red/K09047%09red/K04546%09red/K00922%09red/K04930%09red/K04813%09red/K05858%09red/K04850%09re…
ECM-receptor interaction	KEGG PATHWAY	ko04512	26	60	2.087826976	6.32E-05	0.195830822	K16338:SDC4|K06480:ITGA1|K16857:THBS1|K06591:ITGB8|K05719:ITGB1|K06487:ITGAV|K05717:FN1|K05636:LAMB1|K05635:LAMC1|K06265:DAG1|K06267:HMMR|K06261:GP1BA|K06252:TNXB,TNC|K06244:LAMB3|K06243:6c32367a-4492-49c8-b38e-0202af4580b6,LAMB2|K06241:LAMA4|K06240:LAMA5|K04659:COMP|K06585:ITGA9|K06238:LOC106016943,LOC113844134,COL6A1,COL6A2,LOC101794158|K06254:29116b61-e4d7-4719-997c-8b9bd1193ed8,AGRN|K06256:CD…	https://www.kegg.jp/kegg-bin/show_pathway?ko04512/K16338%09red/K06480%09red/K16857%09red/K06591%09red/K05719%09red/K06487%09red/K05717%09red/K05636%09red/K05635%09red/K06265%09red/K06267%09red/K06261%09red/K06252%09red/K06244%09red/K06243%09red/K06241%09red/K06240%09red/K04659%09red/K06585%09red/K06238%09red/K06254%09red/K06256%09red/K06257%09red/K06258%09red/K06588%09red/K06237%09red/
Renin secretion	KEGG PATHWAY	ko04924	24	46	2.51377161	2.36E-06	0.195931162	K05870:CREB1|K01283:ACE|K13755:PDE1C,PDE1A|K08045:ADCY5|K13296:e6ab3f9e-964b-4bae-86fb-10b89616bc6e,PDE3B|K04142:LOC101800857|K06268:PPP3R1|K09864:AQP1|K04141:ADRB1|K04166:AGTR1|K04936:KCNMA1|K05858:PLCB1,PLCB4,PLCB2|K04850:CACNA1C|K04345:PRKACB|K04857:CACNA1S|K04348:PPP3CA,PPP3CB|K04958:ITPR1|K19021:PDE3A|K12318:GUCY1A2,GUCY1A1|K12319:LOC101796516|K04630:GNAI3|K04632:GNAS|K02183:LOC101805317,CAL…	https://www.kegg.jp/kegg-bin/show_pathway?ko04924/K05870%09red/K01283%09red/K13755%09red/K08045%09red/K13296%09red/K04142%09red/K06268%09red/K09864%09red/K04141%09red/K04166%09red/K04936%09red/K05858%09red/K04850%09red/K04345%09red/K04857%09red/K04348%09red/K04958%09red/K19021%09red/K12318%09red/K12319%09red/K04630%09red/K04632%09red/K02183%09red/K04634%09red/
Glycosaminoglycan biosynthesis - heparan sulfate / heparin	KEGG PATHWAY	ko00534	16	22	3.504045275	2.33E-07	0.265895898	K02366:EXT1|K02514:2058d621-ab91-45be-b7be-de67b56ec3f8|K02369:EXTL2|K00734:B3GALT6|K01793:GLCE|K02513:HS2ST1|K01024:HS3ST1|K00733:B4GALT7|K02576:NDST1|K00771:XYLT1,89d901f8-fb1e-459d-8f8f-8f6dea65ea0a|K02370:EXTL3|K08102:HS6ST2|K08103:HS6ST3|K02577:NDST2|K02367:EXT2|K07809:f7a6ddf5-ea9d-4045-9394-35c88c93f055	https://www.kegg.jp/kegg-bin/show_pathway?ko00534/K02366%09red/K02514%09red/K02369%09red/K00734%09red/K01793%09red/K02513%09red/K01024%09red/K00733%09red/K02576%09red/K00771%09red/K02370%09red/K08102%09red/K08103%09red/K02577%09red/K02367%09red/K07809%09red/
Endometrial cancer	KEGG PATHWAY	ko05213	26	39	3.212041502	7.28E-10	0.276057868	K01110:PTEN|K03083:GSK3B|K09408:FOXO3|K02157:AXIN1|K04357:EGF|K02620:TCF7|K04377:e9e98afd-35da-4c3b-b53e-531ca047a91b|K02105:CTNNB1|K03099:SOS1,SOS2|K04503:CCND1|K05691:CTNNA1,CTNNA2,CTNNA3|K02085:APC2,APC,94caf6ee-5bd3-4149-b3fb-b9adb3de19ca|K00922:PIK3CA,PIK3CB,PIK3CD,PIK3CG|K04361:EGFR|K04385:AXIN2|K04456:AKT3,AKT1|K02833:HRAS|K06272:ILK|K02649:PIK3R5,PIK3R2,PIK3R1,LOC101795759|K04490:TCF7L1|K…	https://www.kegg.jp/kegg-bin/show_pathway?ko05213/K01110%09red/K03083%09red/K09408%09red/K02157%09red/K04357%09red/K02620%09red/K04377%09red/K02105%09red/K03099%09red/K04503%09red/K05691%09red/K02085%09red/K00922%09red/K04361%09red/K04385%09red/K04456%09red/K02833%09red/K06272%09red/K02649%09red/K04490%09red/K04491%09red/K04492%09red/K07827%09red/K04366%09red/K04364%09red/K04365%09red/
RNA polymerase	KEGG PATHWAY	ko03020	16	51	1.511548942	0.049327418	0.286409034	K03002:POLR1B|K03025:POLR3F|K03022:POLR3H|K03014:POLR2F|K03004:TWISTNB|K03005:POLR1E|K03024:POLR3G|K14721:POLR3E|K03026:POLR3D|K03027:POLR1C|K03011:POLR2C|K03010:POLR2B|K03019:POLR3K|K02999:POLR1A|K03008:POLR2J|K03009:POLR2K	https://www.kegg.jp/kegg-bin/show_pathway?ko03020/K03002%09red/K03025%09red/K03022%09red/K03014%09red/K03004%09red/K03005%09red/K03024%09red/K14721%09red/K03026%09red/K03027%09red/K03011%09red/K03010%09red/K03019%09red/K02999%09red/K03008%09red/K03009%09red/
Phospholipase D signaling pathway	KEGG PATHWAY	ko04072	58	99	2.822703138	1.75E-16	0.295312722	K07203:MTOR|K04513:RHOA|K02677:PRKCA|K05091:KIT|K01116:PLCG1,LOC101792010|K01115:PLD1,e52d0119-c13a-4e50-baa5-40ad0b36e494|K04291:LPAR2|K09593:f2353433-db72-4b08-9ec7-bf376c50e502,GAB1|K07831:MRAS|K08042:ADCY2|K08047:ADCY7|K08045:ADCY5|K18441:CYTH3,CYTH4|K04359:PDGFA|K05461:KITLG|K17386:PDGFB|K04262:PTGFR|K16342:PLA2G4B|K01080:PLPP3|K04607:GRM4|K00889:PIP5K1C,PIP5K1A|K07293:LOC101789439|K02649:PI…	https://www.kegg.jp/kegg-bin/show_pathway?ko04072/K07203%09red/K04513%09red/K02677%09red/K05091%09red/K01116%09red/K01115%09red/K04291%09red/K09593%09red/K07831%09red/K08042%09red/K08047%09red/K08045%09red/K18441%09red/K04359%09red/K05461%09red/K17386%09red/K04262%09red/K16342%09red/K01080%09red/K04607%09red/K00889%09red/K07293%09red/K02649%09red/K07834%09red/K03099%09red/K04527%09red/K07835%09re…
Protein digestion and absorption	KEGG PATHWAY	ko04974	18	56	1.548662867	0.030560618	0.330933407	K05849:SLC8A1,SLC8A3|K16630:COL22A1|K16628:COL7A1|K16629:COL21A1|K16617:COL13A1|K01539:ATP1A1|K08187:SLC16A10|K04897:KCNE3|K14207:SLC38A2|K06823:COL18A1|K01540:ATP1B3,ATP1B1|K06238:LOC106016943,LOC113844134,COL6A1,COL6A2,LOC101794158|K19721:COL27A1,COL5A1,COL5A2,c2993085-95a0-4655-ae6d-689cdf5ad9cc,COL11A1,COL24A1|K08132:057b8e2a-7d21-4d70-8549-312ee275cb6b|K04916:KCNK5|K08133:COL14A1|K06237:COL4…	https://www.kegg.jp/kegg-bin/show_pathway?ko04974/K05849%09red/K16630%09red/K16628%09red/K16629%09red/K16617%09red/K01539%09red/K08187%09red/K04897%09red/K14207%09red/K06823%09red/K01540%09red/K06238%09red/K19721%09red/K08132%09red/K04916%09red/K08133%09red/K06237%09red/K01285%09red/
Gastric acid secretion	KEGG PATHWAY	ko04971	23	49	2.261539425	3.58E-05	0.334304393	K04515:LOC113845138,CAMK2G|K02677:PRKCA|K04920:KCNK10|K08042:ADCY2|K08047:ADCY7|K08045:ADCY5|K08049:ADCY9|K08007:EZR|K02183:LOC101805317,CALM2,CALM1|K01539:ATP1A1|K05031:CFTR|K00907:MYLK4,MYLK|K05858:PLCB1,PLCB4,PLCB2|K04345:PRKACB|K05742:SLC9A1|K19662:PRKCB|K04131:CHRM3|K04958:ITPR1|K01540:ATP1B3,ATP1B1|K04630:GNAI3|K04632:GNAS|K04634:LOC101794123,LOC101790479|K04913:KCNK2	https://www.kegg.jp/kegg-bin/show_pathway?ko04971/K04515%09red/K02677%09red/K04920%09red/K08042%09red/K08047%09red/K08045%09red/K08049%09red/K08007%09red/K02183%09red/K01539%09red/K05031%09red/K00907%09red/K05858%09red/K04345%09red/K05742%09red/K19662%09red/K04131%09red/K04958%09red/K01540%09red/K04630%09red/K04632%09red/K04634%09red/K04913%09red/
Nucleotide excision repair	KEGG PATHWAY	ko03420	23	47	2.357775145	1.53E-05	0.405352034	K03142:GTF2H2|K03141:GTF2H1|K10740:RPA3|K10609:CUL4B,CUL4A|K10140:DDB2|K03868:RBX1|K07466:RPA1|K10839:RAD23B|K10838:XPC|K10739:RPA2|K10756:RFC3|K10754:RFC1|K10755:RFC2|K10610:DDB1|K02324:LOC101790280|K02326:POLE3|K10842:MNAT1|K10843:LOC101798344,ERCC3|K10841:ERCC6|K10846:LOC101799732|K10847:XPA|K10848:LOC101797192|K03504:POLD3	https://www.kegg.jp/kegg-bin/show_pathway?ko03420/K03142%09red/K03141%09red/K10740%09red/K10609%09red/K10140%09red/K03868%09red/K07466%09red/K10839%09red/K10838%09red/K10739%09red/K10756%09red/K10754%09red/K10755%09red/K10610%09red/K02324%09red/K02326%09red/K10842%09red/K10843%09red/K10841%09red/K10846%09red/K10847%09red/K10848%09red/K03504%09red/
Herpes simplex infection	KEGG PATHWAY	ko05168	56	144	1.873690876	4.26E-07	0.458677116	K02373:FADD|K16196:EIF2AK4|K16194:EIF2AK1|K02223:CLOCK|K11220:STAT1|K10159:LOC110351185|K09849:TRAF5|K03121:GTF2IRD1,GTF2I|K03120:TBP,TBPL1|K04390:FAS|K04448:JUN|K03129:LOC101804819,TAF4|K10054:LOC101796105,PML|K04398:CASP8|K14650:TAF3|K08738:LOC113841161,CYC|K15414:C1QBP|K04440:MAPK9,MAPK8|K04447:JAK2|K03237:EIF2S1|K12886:HNRNPK|K06081:NECTIN1|K05131:IFNAR2|K05132:IFNGR1|K05133:IFNGR2|K07293:LOC…	https://www.kegg.jp/kegg-bin/show_pathway?ko05168/K02373%09red/K16196%09red/K16194%09red/K02223%09red/K11220%09red/K10159%09red/K09849%09red/K03121%09red/K03120%09red/K04390%09red/K04448%09red/K03129%09red/K10054%09red/K04398%09red/K14650%09red/K08738%09red/K15414%09red/K04440%09red/K04447%09red/K03237%09red/K12886%09red/K06081%09red/K05131%09red/K05132%09red/K05133%09red/K07293%09red/K01165%09re…
Epithelial cell signaling in Helicobacter pylori infection	KEGG PATHWAY	ko05120	27	90	1.445418676	0.024048837	0.678205624	K06785:JAM3|K04430:MAP2K4|K01116:PLCG1,LOC101792010|K04734:NFKBIA|K02155:ATP6V0C|K02152:ATP6V1G1|K08523:HBEGF|K05099:MET|K04441:MAPK12,MAPK14|K04440:MAPK9,MAPK8|K02187:CASP3|K07293:LOC101789439|K02150:ATP6V1E1|K04466:MAP3K14|K05854:LYN|K02146:ATP6V0D1|K05859:PLCG2|K07209:IKBKB|K04448:JUN|K06059:ADAM17|K05728:CSK|K05701:TJP1|K05704:SRC|K08114:PTPRZ1|K02580:NFKB1|K06704:ADAM10|K04361:EGFR	https://www.kegg.jp/kegg-bin/show_pathway?ko05120/K06785%09red/K04430%09red/K01116%09red/K04734%09red/K02155%09red/K02152%09red/K08523%09red/K05099%09red/K04441%09red/K04440%09red/K02187%09red/K07293%09red/K02150%09red/K04466%09red/K05854%09red/K02146%09red/K05859%09red/K07209%09red/K04448%09red/K06059%09red/K05728%09red/K05701%09red/K05704%09red/K08114%09red/K02580%09red/K06704%09red/K04361%09re…
Aldosterone synthesis and secretion	KEGG PATHWAY	ko04925	31	58	2.575171204	3.86E-08	0.682683355	K04515:LOC113845138,CAMK2G|K08794:CAMK1G,CAMK1D|K09053:ATF1|K02677:PRKCA|K05870:CREB1|K18050:PRKCE,5ad0a8fe-8aee-43af-8b2a-d5840b109e92|K13806:DAGLA|K08042:ADCY2|K08047:ADCY7|K08045:ADCY5|K08049:ADCY9|K18283:LOC113844815|K04374:8ddd9e5e-2fd9-47f0-8e91-e094ab22b3c5|K04166:AGTR1|K02183:LOC101805317,CALM2,CALM1|K04919:KCNK9|K09048:CREB3,CREB3L2,CREB3L1|K04345:PRKACB|K09047:CREB5|K05858:PLCB1,PLCB4,P…	https://www.kegg.jp/kegg-bin/show_pathway?ko04925/K04515%09red/K08794%09red/K09053%09red/K02677%09red/K05870%09red/K18050%09red/K13806%09red/K08042%09red/K08047%09red/K08045%09red/K08049%09red/K18283%09red/K04374%09red/K04166%09red/K02183%09red/K04919%09red/K09048%09red/K04345%09red/K09047%09red/K05858%09red/K04850%09red/K16931%09red/K04854%09red/K04855%09red/K19662%09red/K06070%09red/K04857%09re…
Pathogenic Escherichia coli infection	KEGG PATHWAY	ko05130	19	43	2.128911228	0.000445899	0.71372677	K05747:WASL|K02105:CTNNB1|K17388:ROCK2|K05719:ITGB1|K04513:RHOA|K04514:ROCK1|K05703:FYN|K02677:PRKCA|K05692:ACTB|K11294:NCL|K07375:TUBB3,TUBB4B,TUBB6,LOC101802187,7e46c545-31b3-4dc9-b54c-dd92d2947210|K06106:LOC101793940,CTTN|K05758:ARPC2|K06619:ABL1|K19862:NCK2|K08007:EZR|K10160:TLR4|K05754:ARPC5L,ARPC5|K07374:LOC101797289,LOC101804924,LOC101802038	https://www.kegg.jp/kegg-bin/show_pathway?ko05130/K05747%09red/K02105%09red/K17388%09red/K05719%09red/K04513%09red/K04514%09red/K05703%09red/K02677%09red/K05692%09red/K11294%09red/K07375%09red/K06106%09red/K05758%09red/K06619%09red/K19862%09red/K08007%09red/K10160%09red/K05754%09red/K07374%09red/
Adrenergic signaling in cardiomyocytes	KEGG PATHWAY	ko04261	50	92	2.618512094	1.17E-12	0.724711918	K04515:LOC113845138,CAMK2G|K12750:MYL4|K02677:PRKCA|K02161:BCL2|K08042:ADCY2|K08045:ADCY5|K08047:ADCY7|K04863:CACNB2|K04354:PPP2R2B,PPP2R2C|K08049:ADCY9|K05865:TNNC1|K04869:CACNG4|K11584:PPP2R5A,PPP2R5D,PPP2R5E,PPP2R5C|K04441:MAPK12,MAPK14|K04445:RPS6KA5|K09052:CREM|K11583:PPP2R3A,PPP2R3B|K04142:LOC101800857|K04374:8ddd9e5e-2fd9-47f0-8e91-e094ab22b3c5|K02649:PIK3R5,PIK3R2,PIK3R1,LOC101795759|K021…	https://www.kegg.jp/kegg-bin/show_pathway?ko04261/K04515%09red/K12750%09red/K02677%09red/K02161%09red/K08042%09red/K08045%09red/K08047%09red/K04863%09red/K04354%09red/K08049%09red/K05865%09red/K04869%09red/K11584%09red/K04441%09red/K04445%09red/K09052%09red/K11583%09red/K04142%09red/K04374%09red/K02649%09red/K02183%09red/K01539%09red/K09048%09red/K04141%09red/K12045%09red/K12749%09red/K09047%09re…
Ras signaling pathway	KEGG PATHWAY	ko04014	95	167	2.740813857	7.59E-25	0.759597751	K14958:KSR1|K07861:RAC3|K01116:PLCG1,LOC101792010|K01115:PLD1,e52d0119-c13a-4e50-baa5-40ad0b36e494|K05860:PLCE1|K05448:VEGFA|K06619:ABL1|K01047:PROCA1|K04163:HTR7|K05210:GRIN2B|K04347:GNG12|K05859:PLCG2|K05453:CSF1|K04345:PRKACB|K05450:PDGFD,PDGFC|K02833:HRAS|K17447:SHC2|K17449:SHC4|K07834:RALA|K06279:a38df56e-6848-4bb0-bb71-f873d37264dc|K04513:RHOA|K07888:LOC113840038|K19613:SHOC2|K07887:RAB5A|K…	https://www.kegg.jp/kegg-bin/show_pathway?ko04014/K14958%09red/K07861%09red/K01116%09red/K01115%09red/K05860%09red/K05448%09red/K06619%09red/K01047%09red/K04163%09red/K05210%09red/K04347%09red/K05859%09red/K05453%09red/K04345%09red/K05450%09red/K02833%09red/K17447%09red/K17449%09red/K07834%09red/K06279%09red/K04513%09red/K07888%09red/K19613%09red/K07887%09red/K04352%09red/K04357%09red/K08732%09re…
Leukocyte transendothelial migration	KEGG PATHWAY	ko04670	42	75	2.698114862	2.03E-11	0.759597751	K12755:MYL9|K06785:JAM3|K04513:RHOA|K06787:LOC101801460|K02677:PRKCA|K01116:PLCG1,LOC101792010|K12757:LOC101795371|K10031:CXCL12|K05732:ARHGAP35|K06533:CDH5|K05719:ITGB1|K04514:ROCK1|K17388:ROCK2|K06514:THY1|K04441:MAPK12,MAPK14|K08008:LOC101792171|K08007:EZR|K07293:LOC101789439|K07836:RAP1B|K02649:PIK3R5,PIK3R2,PIK3R1,LOC101795759|K08015:RASSF5|K05699:ACTN2,ACTN1|K02105:CTNNB1|K05691:CTNNA1,CTNN…	https://www.kegg.jp/kegg-bin/show_pathway?ko04670/K12755%09red/K06785%09red/K04513%09red/K06787%09red/K02677%09red/K01116%09red/K12757%09red/K10031%09red/K05732%09red/K06533%09red/K05719%09red/K04514%09red/K17388%09red/K06514%09red/K04441%09red/K08008%09red/K08007%09red/K07293%09red/K07836%09red/K02649%09red/K08015%09red/K05699%09red/K02105%09red/K05691%09red/K05690%09red/K05692%09red/K01398%09re…
Tight junction	KEGG PATHWAY	ko04530	51	77	3.19118409	6.71E-18	0.762613578	K12755:MYL9|K06785:JAM3|K04513:RHOA|K04424:MAP3K20|K02677:PRKCA|K01110:PTEN|K04456:AKT3,AKT1|K06102:CGN|K18050:PRKCE,5ad0a8fe-8aee-43af-8b2a-d5840b109e92|K12757:LOC101795371|K18625:SHROOM1,SHROOM2,SHROOM3|K04237:PARD3|K04354:PPP2R2B,PPP2R2C|K05631:MAGI1|K06103:CASK|K06104:AMOTL1,12500ea8-85ef-4866-b6b9-b0eb94da75f5|K06105:TJAP1|K06106:LOC101793940,CTTN|K06107:EPB41L1,EPB41,LOC113840995,EPB41L2|K0…	https://www.kegg.jp/kegg-bin/show_pathway?ko04530/K12755%09red/K06785%09red/K04513%09red/K04424%09red/K02677%09red/K01110%09red/K04456%09red/K06102%09red/K18050%09red/K12757%09red/K18625%09red/K04237%09red/K04354%09red/K05631%09red/K06103%09red/K06104%09red/K06105%09red/K06106%09red/K06107%09red/K06099%09red/K07831%09red/K07830%09red/K06087%09red/K05699%09red/K02105%09red/K05691%09red/K03097%09re…
Renal cell carcinoma	KEGG PATHWAY	ko05211	35	51	3.306513311	2.10E-13	0.769746441	K04410:PAK2|K04438:CRKL,CRK|K09594:FLCN|K09592:EGLN1,EGLN3|K09593:f2353433-db72-4b08-9ec7-bf376c50e502,GAB1|K05733:PAK3|K05099:MET|K05736:PAK5|K09097:ARNT|K09095:EPAS1|K05448:VEGFA|K17386:PDGFB|K07299:SLC2A1|K04448:JUN|K07293:LOC101789439|K07836:RAP1B|K02649:PIK3R5,PIK3R2,PIK3R1,LOC101795759|K03099:SOS1,SOS2|K01679:FH|K00922:PIK3CA,PIK3CB,PIK3CD,PIK3CG|K03868:RBX1|K07827:KRAS|K03872:ELOC|K03871:L…	https://www.kegg.jp/kegg-bin/show_pathway?ko05211/K04410%09red/K04438%09red/K09594%09red/K09592%09red/K09593%09red/K05733%09red/K05099%09red/K05736%09red/K09097%09red/K09095%09red/K05448%09red/K17386%09red/K07299%09red/K04448%09red/K07293%09red/K07836%09red/K02649%09red/K03099%09red/K01679%09red/K00922%09red/K03868%09red/K07827%09red/K03872%09red/K03871%09red/K03870%09red/K15589%09red/K04498%09re…
AGE-RAGE signaling pathway in diabetic complications	KEGG PATHWAY	ko04933	42	72	2.810536314	3.19E-12	0.810923967	K04692:STAT3|K02677:PRKCA|K01116:PLCG1,LOC101792010|K18050:PRKCE,5ad0a8fe-8aee-43af-8b2a-d5840b109e92|K11220:STAT1|K04448:JUN|K03907:THBD|K05717:FN1|K05448:VEGFA|K05860:PLCE1|K04441:MAPK12,MAPK14|K04440:MAPK9,MAPK8|K04447:JAK2|K04446:NFATC1|K04702:PIM1|K08008:LOC101792171|K02187:CASP3|K02649:PIK3R5,PIK3R2,PIK3R1,LOC101795759|K04503:CCND1|K04500:SMAD3,SMAD2|K04501:SMAD4|K01398:MMP2|K05857:PLCD3,PL…	https://www.kegg.jp/kegg-bin/show_pathway?ko04933/K04692%09red/K02677%09red/K01116%09red/K18050%09red/K11220%09red/K04448%09red/K03907%09red/K05717%09red/K05448%09red/K05860%09red/K04441%09red/K04440%09red/K04447%09red/K04446%09red/K04702%09red/K08008%09red/K02187%09red/K02649%09red/K04503%09red/K04500%09red/K04501%09red/K01398%09red/K05857%09red/K00922%09red/K02161%09red/K05859%09red/K05858%09re…
Regulation of mitophagy - yeast	KEGG PATHWAY	ko04139	13	34	1.842200273	0.014638139	0.820904426	K08955:YME1L1|K02677:PRKCA|K03097:CSNK2A1|K07203:MTOR|K08269:ULK1,ULK2|K11088:SNRPD3|K08341:GABARAPL2,GABARAPL1|K04441:MAPK12,MAPK14|K11644:SIN3A|K17800:LETM1|K11841:USP10|K02332:POLG|K00889:PIP5K1C,PIP5K1A	https://www.kegg.jp/kegg-bin/show_pathway?ko04139/K08955%09red/K02677%09red/K03097%09red/K07203%09red/K08269%09red/K11088%09red/K08341%09red/K04441%09red/K11644%09red/K17800%09red/K11841%09red/K02332%09red/K00889%09red/
Transcriptional misregulation in cancer	KEGG PATHWAY	ko05202	81	147	2.654850629	3.56E-20	0.851407942	K08024:HHEX|K02580:NFKB1|K10151:CCND2|K09053:ATF1|K11447:KDM6A|K09055:CEBPA|K12823:DDX5|K06067:HDAC2|K02211:CDK9|K09438:SPI1|K08524:RXRA,c1d0c671-20aa-4705-8c5b-b54c1ca490b3|K03160:CD40|K10053:CBFA2T3,RUNX1T1|K10054:LOC101796105,PML|K14242:NFKBIZ|K10056:JUP|K09035:01eb529f-2c4f-406e-910d-96b085d390f9|K15593:ETV5|K05099:MET|K09355:PBX4,PBX1|K14651:TAF15|K09278:RUNX2|K04454:MEF2C|K04359:PDGFA|K1125…	https://www.kegg.jp/kegg-bin/show_pathway?ko05202/K08024%09red/K02580%09red/K10151%09red/K09053%09red/K11447%09red/K09055%09red/K12823%09red/K06067%09red/K02211%09red/K09438%09red/K08524%09red/K03160%09red/K10053%09red/K10054%09red/K14242%09red/K10056%09red/K09035%09red/K15593%09red/K05099%09red/K09355%09red/K14651%09red/K09278%09red/K04454%09red/K04359%09red/K11253%09red/K05096%09red/K08854%09re…
Morphine addiction	KEGG PATHWAY	ko05032	30	64	2.258466681	2.50E-06	0.944976099	K04538:GNB4|K02677:PRKCA|K04534:LOC101791437,LOC113844914|K00910:GRK2|K13755:PDE1C,PDE1A|K08042:ADCY2|K08047:ADCY7|K08045:ADCY5|K13296:e6ab3f9e-964b-4bae-86fb-10b89616bc6e,PDE3B|K05175:GABRA3|K08049:ADCY9|K13293:PDE4C,PDE4D,PDE4B|K04536:GNB1|K05192:LOC101802647|K04997:KCNJ3|K04543:GNG7|K04546:LOC101794407|K18437:PDE8A|K18436:PDE7A,00c8c117-3a01-4f36-9b62-36e74a3fc092,PDE7B|K18438:PDE10A|K07826:GN…	https://www.kegg.jp/kegg-bin/show_pathway?ko05032/K04538%09red/K02677%09red/K04534%09red/K00910%09red/K13755%09red/K08042%09red/K08047%09red/K08045%09red/K13296%09red/K05175%09red/K08049%09red/K13293%09red/K04536%09red/K05192%09red/K04997%09red/K04543%09red/K04546%09red/K18437%09red/K18436%09red/K18438%09red/K07826%09red/K04345%09red/K04347%09red/K19662%09red/K18283%09red/K19021%09red/K05000%09re…
Parkinson's disease	KEGG PATHWAY	ko05012	43	122	1.698169483	0.000139502	0.944976099	K04558:SNCAIP|K02256:COX1|K04552:UBE2L3|K04555:UBE2G2|K04554:UBE2J2|K04557:SEPT5|K08738:LOC113841161,CYC|K02270:LOC101796089|K02137:ATP5PO|K03961:NDUFB5|K08045:ADCY5|K03965:LOC101800441|K03967:NDUFC1|K03966:NDUFB10|K05863:SLC25A6,SLC25A4|K02187:CASP3|K03884:ND6|K10575:UBE2G1|K03883:ND5|K03880:ND3|K03881:ND4|K00416:LOC101793235|K08844:LRRK2|K03178:UBA7|K02261:COX2|K02262:COX3|K02126:ATP6|K02127:AT…	https://www.kegg.jp/kegg-bin/show_pathway?ko05012/K04558%09red/K02256%09red/K04552%09red/K04555%09red/K04554%09red/K04557%09red/K08738%09red/K02270%09red/K02137%09red/K03961%09red/K08045%09red/K03965%09red/K03967%09red/K03966%09red/K05863%09red/K02187%09red/K03884%09red/K10575%09red/K03883%09red/K03880%09red/K03881%09red/K00416%09red/K08844%09red/K03178%09red/K02261%09red/K02262%09red/K02126%09re…
Pathways in cancer	KEGG PATHWAY	ko05200	185	316	2.820701003	3.26E-50	1	K05717:FN1|K00182:WNT2|K07861:RAC3|K01110:PTEN|K01116:PLCG1,LOC101792010|K11220:STAT1|K02091:CDK6|K02157:AXIN1|K10053:CBFA2T3,RUNX1T1|K10054:LOC101796105,PML|K10056:JUP|K09487:HSP90B1|K04482:RAD51|K04496:CTBP1,CTBP2|K05448:VEGFA|K17454:E2F1|K06619:ABL1|K04166:AGTR1|K04504:PPARD|K04503:CCND1|K04500:SMAD3,SMAD2|K04501:SMAD4|K05691:CTNNA1,CTNNA2,CTNNA3|K07826:GNG2|K09288:CCDC6|K04462:MECOM|K02085:AP…	https://www.kegg.jp/kegg-bin/show_pathway?ko05200/K05717%09red/K00182%09red/K07861%09red/K01110%09red/K01116%09red/K11220%09red/K02091%09red/K02157%09red/K10053%09red/K10054%09red/K10056%09red/K09487%09red/K04482%09red/K04496%09red/K05448%09red/K17454%09red/K06619%09red/K04166%09red/K04504%09red/K04503%09red/K04500%09red/K04501%09red/K05691%09red/K07826%09red/K09288%09red/K04462%09red/K02085%09re…
Endocytosis	KEGG PATHWAY	ko04144	112	177	3.048717358	4.60E-35	1	K10591:NEDD4|K01115:PLD1,e52d0119-c13a-4e50-baa5-40ad0b36e494|K10054:LOC101796105,PML|K04645:LOC113839618|K04644:LOC101793731|K04646:CLTCL1|K11981:LOC101792930|K00889:PIP5K1C,PIP5K1A|K04500:SMAD3,SMAD2|K04180:LOC101800757|K12562:BIN1|K00909:GRK7|K10396:KIF5B,KIF5C|K04678:SMURF1,SMURF2|K04679:148cbe0c-eb41-4555-897c-d07ea32031c7,ZFYVE16,ZFYVE9|K12959:CAV3|K04674:TGFBR1|K05754:ARPC5L,ARPC5|K02833:H…	https://www.kegg.jp/kegg-bin/show_pathway?ko04144/K10591%09red/K01115%09red/K10054%09red/K04645%09red/K04644%09red/K04646%09red/K11981%09red/K00889%09red/K04500%09red/K04180%09red/K12562%09red/K00909%09red/K10396%09red/K04678%09red/K04679%09red/K12959%09red/K04674%09red/K05754%09red/K02833%09red/K12482%09red/K18952%09red/K07903%09red/K07901%09red/K04513%09red/K07888%09red/K00910%09red/K07887%09re…
Rap1 signaling pathway	KEGG PATHWAY	ko04015	94	156	2.903191358	3.20E-27	1	K07861:RAC3|K01116:PLCG1,LOC101792010|K05860:PLCE1|K05448:VEGFA|K04270:P2RY1|K04277:CNR1,LOC113843136|K05210:GRIN2B|K05690:CTNND1|K05692:ACTB|K07361:LCP2|K05858:PLCB1,PLCB4,PLCB2|K05453:CSF1|K05450:PDGFD,PDGFC|K06070:PRKD3,PRKD1|K05726:BCAR1,522ef0bc-1daf-4487-bfa5-4386f2ff73f4|K06277:RAPGEF1|K02833:HRAS|K18952:PRKCZ|K06271:TLN2,LOC101802891,LOC101795363|K04267:ADORA2B|K04266:ADORA2A|K07834:RALA|…	https://www.kegg.jp/kegg-bin/show_pathway?ko04015/K07861%09red/K01116%09red/K05860%09red/K05448%09red/K04270%09red/K04277%09red/K05210%09red/K05690%09red/K05692%09red/K07361%09red/K05858%09red/K05453%09red/K05450%09red/K06070%09red/K05726%09red/K06277%09red/K02833%09red/K18952%09red/K06271%09red/K04267%09red/K04266%09red/K07834%09red/K04513%09red/K04291%09red/K04357%09red/K08732%09red/K04359%09re…
Focal adhesion	KEGG PATHWAY	ko04510	90	148	2.929902722	1.58E-26	1	K07861:RAC3|K01110:PTEN|K10351:LOC101803605|K05448:VEGFA|K06591:ITGB8|K05699:ACTN2,ACTN1|K04503:CCND1|K05692:ACTB|K00907:MYLK4,MYLK|K13708:DOCK1,LOC113843992|K13709:ARHGAP5|K05450:PDGFD,PDGFC|K12959:CAV3|K05726:BCAR1,522ef0bc-1daf-4487-bfa5-4386f2ff73f4|K06277:RAPGEF1|K02833:HRAS|K17447:SHC2|K06273:2472c2d2-7982-4ecb-b1d0-3fa834a50fe9,ZYX|K06270:PPP1R12A|K06271:TLN2,LOC101802891,LOC101795363|K044…	https://www.kegg.jp/kegg-bin/show_pathway?ko04510/K07861%09red/K01110%09red/K10351%09red/K05448%09red/K06591%09red/K05699%09red/K04503%09red/K05692%09red/K00907%09red/K13708%09red/K13709%09red/K05450%09red/K12959%09red/K05726%09red/K06277%09red/K02833%09red/K17447%09red/K06273%09red/K06270%09red/K06271%09red/K04456%09red/K17449%09red/K05760%09red/K06279%09red/K04514%09red/K04513%09red/K17388%09re…
Cell cycle	KEGG PATHWAY	ko04110	64	107	2.881831628	1.07E-18	1	K16197:YWHAB,YWHAZ,YWHAQ|K10151:CCND2|K08866:TTK|K06622:CDKN2C|K03351:ANAPC4|K04377:e9e98afd-35da-4c3b-b53e-531ca047a91b|K09389:29befb83-4d49-48c6-8da4-9559c88e094d,E2F2|K09392:TFDP2|K06067:HDAC2|K02212:MCM4|K02214:CDC7|K06645:CDC25A|K02216:CHEK1|K02091:CDK6|K12456:ANAPC13|K13376:TGFB2|K04503:CCND1|K06618:RB1|K06670:RAD21|K06671:STAG1,STAG2,LOC101794805|K03868:RBX1|K05868:CCNB2|K03363:CDC20|K0586…	https://www.kegg.jp/kegg-bin/show_pathway?ko04110/K16197%09red/K10151%09red/K08866%09red/K06622%09red/K03351%09red/K04377%09red/K09389%09red/K09392%09red/K06067%09red/K02212%09red/K02214%09red/K06645%09red/K02216%09red/K02091%09red/K12456%09red/K13376%09red/K04503%09red/K06618%09red/K06670%09red/K06671%09red/K03868%09red/K05868%09red/K03363%09red/K05867%09red/K04501%09red/K17454%09red/K06619%09re…
FoxO signaling pathway	KEGG PATHWAY	ko04068	60	100	2.890837352	1.05E-17	1	K12358:FOXO4|K04411:LOC101789768|K04692:STAT3|K10151:CCND2|K01110:PTEN|K11411:SIRT1|K08863:PLK4|K04293:S1PR4|K15010:HOMER2,HOMER1|K07198:PRKAA1|K07199:PRKAB1,PRKAB2|K04503:CCND1|K15618:BCL6|K04357:EGF|K05868:CCNB2|K04501:SMAD4|K16341:BCL2L11|K13302:35f85995-0c1d-4726-8206-c2fe65c1e435|K08341:GABARAPL2,GABARAPL1|K04441:MAPK12,MAPK14|K04440:MAPK9,MAPK8|K07298:STK11|K11838:USP7|K01084:G6PC2|K02649:P…	https://www.kegg.jp/kegg-bin/show_pathway?ko04068/K12358%09red/K04411%09red/K04692%09red/K10151%09red/K01110%09red/K11411%09red/K08863%09red/K04293%09red/K15010%09red/K07198%09red/K07199%09red/K04503%09red/K15618%09red/K04357%09red/K05868%09red/K04501%09red/K16341%09red/K13302%09red/K08341%09red/K04441%09red/K04440%09red/K07298%09red/K11838%09red/K01084%09red/K02649%09red/K08861%09red/K04728%09re…
Insulin signaling pathway	KEGG PATHWAY	ko04910	53	86	2.969270924	1.64E-16	1	K04739:PRKAR2A,PRKAR1B|K04697:SOCS4|K04694:SOCS1|K04695:SOCS2|K03083:GSK3B|K04438:CRKL,CRK|K07205:EIF4EBP1|K00665:FASN|K07198:PRKAA1|K07199:PRKAB1,PRKAB2|K07195:EXOC7|K11262:ACACA|K07190:PHKA2|K07192:FLOT2|K04365:BRAF|K13296:e6ab3f9e-964b-4bae-86fb-10b89616bc6e,PDE3B|K00844:LOC101794107,LOC101794283|K07200:PRKAG2|K04440:MAPK9,MAPK8|K01084:G6PC2|K04372:MKNK2|K06269:PPP1CB|K02649:PIK3R5,PIK3R2,PIK3…	https://www.kegg.jp/kegg-bin/show_pathway?ko04910/K04739%09red/K04697%09red/K04694%09red/K04695%09red/K03083%09red/K04438%09red/K07205%09red/K00665%09red/K07198%09red/K07199%09red/K07195%09red/K11262%09red/K07190%09red/K07192%09red/K04365%09red/K13296%09red/K00844%09red/K07200%09red/K04440%09red/K01084%09red/K04372%09red/K06269%09red/K02649%09red/K02183%09red/K03099%09red/K04527%09red/K05695%09re…
EGFR tyrosine kinase inhibitor resistance	KEGG PATHWAY	ko01521	45	67	3.236011961	2.66E-16	1	K07203:MTOR|K04692:STAT3|K02677:PRKCA|K01110:PTEN|K11217:JAK1|K01116:PLCG1,LOC101792010|K03083:GSK3B|K09408:FOXO3|K09593:f2353433-db72-4b08-9ec7-bf376c50e502,GAB1|K05099:MET|K05098:KDR|K04357:EGF|K04359:PDGFA|K05448:VEGFA|K17386:PDGFB|K05094:FGFR3|K16341:BCL2L11|K02833:HRAS|K04447:JAK2|K05455:6117fb1b-7eab-4317-8294-249985587b5d,LOC101791354|K02649:PIK3R5,PIK3R2,PIK3R1,LOC101795759|K03099:SOS1,SO…	https://www.kegg.jp/kegg-bin/show_pathway?ko01521/K07203%09red/K04692%09red/K02677%09red/K01110%09red/K11217%09red/K01116%09red/K03083%09red/K09408%09red/K09593%09red/K05099%09red/K05098%09red/K04357%09red/K04359%09red/K05448%09red/K17386%09red/K05094%09red/K16341%09red/K02833%09red/K04447%09red/K05455%09red/K02649%09red/K03099%09red/K04365%09red/K04688%09red/K00922%09red/K03259%09red/K02161%09re…
Melanogenesis	KEGG PATHWAY	ko04916	44	67	3.164100584	2.04E-15	1	K04515:LOC113845138,CAMK2G|K00182:WNT2|K02376:FZD6|K02375:FZD8,3721d97d-4d42-486a-8ab2-82b764f0bffd,FZD5|K01384:WNT11|K05228:POMC|K02677:PRKCA|K04534:LOC101791437,LOC113844914|K03083:GSK3B|K02235:FZD2|K02353:DVL3,DVL1|K02354:FZD4|K08042:ADCY2|K08047:ADCY7|K08045:ADCY5|K08049:ADCY9|K00408:WNT4|K05461:KITLG|K02620:TCF7|K02432:FZD1,FZD7|K01558:WNT16|K02842:FZD10,FZD9|K02183:LOC101805317,CALM2,CALM1|…	https://www.kegg.jp/kegg-bin/show_pathway?ko04916/K04515%09red/K00182%09red/K02376%09red/K02375%09red/K01384%09red/K05228%09red/K02677%09red/K04534%09red/K03083%09red/K02235%09red/K02353%09red/K02354%09red/K08042%09red/K08047%09red/K08045%09red/K08049%09red/K00408%09red/K05461%09red/K02620%09red/K02432%09red/K01558%09red/K02842%09red/K02183%09red/K02105%09red/K09048%09red/K01064%09red/K04630%09re…
ErbB signaling pathway	KEGG PATHWAY	ko04012	44	68	3.117569693	4.62E-15	1	K04410:PAK2|K04515:LOC113845138,CAMK2G|K04430:MAP2K4|K02677:PRKCA|K01116:PLCG1,LOC101792010|K03083:GSK3B|K04438:CRKL,CRK|K09593:f2353433-db72-4b08-9ec7-bf376c50e502,GAB1|K08523:HBEGF|K05733:PAK3|K05736:PAK5|K06619:ABL1|K04440:MAPK9,MAPK8|K04448:JUN|K09782:AREG|K02649:PIK3R5,PIK3R2,PIK3R1,LOC101795759|K03099:SOS1,SOS2|K04365:BRAF|K04688:RPS6KB1|K00922:PIK3CA,PIK3CB,PIK3CD,PIK3CG|K04357:EGF|K05457:…	https://www.kegg.jp/kegg-bin/show_pathway?ko04012/K04410%09red/K04515%09red/K04430%09red/K02677%09red/K01116%09red/K03083%09red/K04438%09red/K09593%09red/K08523%09red/K05733%09red/K05736%09red/K06619%09red/K04440%09red/K04448%09red/K09782%09red/K02649%09red/K03099%09red/K04365%09red/K04688%09red/K00922%09red/K04357%09red/K05457%09red/K05859%09red/K07827%09red/K05725%09red/K05455%09red/K19662%09re…
Neurotrophin signaling pathway	KEGG PATHWAY	ko04722	52	90	2.783769302	1.43E-14	1	K04515:LOC113845138,CAMK2G|K04513:RHOA|K04731:IRAK2|K02161:BCL2|K01116:PLCG1,LOC101792010|K03083:GSK3B|K04438:CRKL,CRK|K09408:FOXO3|K03099:SOS1,SOS2|K09593:f2353433-db72-4b08-9ec7-bf376c50e502,GAB1|K04416:MAP3K1|K04443:MAPKAPK2|K06619:ABL1|K04441:MAPK12,MAPK14|K04440:MAPK9,MAPK8|K04445:RPS6KA5|K04373:RPS6KA6,RPS6KA2,RPS6KA3|K04448:JUN|K07293:LOC101789439|K07836:RAP1B|K02649:PIK3R5,PIK3R2,PIK3R1,L…	https://www.kegg.jp/kegg-bin/show_pathway?ko04722/K04515%09red/K04513%09red/K04731%09red/K02161%09red/K01116%09red/K03083%09red/K04438%09red/K09408%09red/K03099%09red/K09593%09red/K04416%09red/K04443%09red/K06619%09red/K04441%09red/K04440%09red/K04445%09red/K04373%09red/K04448%09red/K07293%09red/K07836%09red/K02649%09red/K02183%09red/K04522%09red/K04505%09red/K04421%09red/K04365%09red/K10148%09re…
RNA transport	KEGG PATHWAY	ko03013	69	138	2.409031127	1.64E-14	1	K09291:TPR|K03254:EIF3A|K03754:EIF2B2|K14283:TACC3|K14523:RPP38|K00974:TRNT1|K10577:UBE2I|K13114:PNN|K12160:SUMO2,SUMO1|K03240:EIF2B5|K03231:EEF1A2,EEF1A1|K03242:EIF2S3|K14328:UPF3B,UPF3A|K03262:EIF5|K03245:EIF3J|K03260:55e87077-d39f-4b52-bcaa-a5a86914f996,EIF4G1,EIF4G3,EIF4G2|K14306:NUP62CL|K14322:PAIP1|K14321:NUPL2|K14327:UPF2|K14326:UPF1|K14325:RNPS1|K03237:EIF2S1|K07562:NMD3|K14525:RPP25L|K13…	https://www.kegg.jp/kegg-bin/show_pathway?ko03013/K09291%09red/K03254%09red/K03754%09red/K14283%09red/K14523%09red/K00974%09red/K10577%09red/K13114%09red/K12160%09red/K03240%09red/K03231%09red/K03242%09red/K14328%09red/K03262%09red/K03245%09red/K03260%09red/K14306%09red/K14322%09red/K14321%09red/K14327%09red/K14326%09red/K14325%09red/K03237%09red/K07562%09red/K14525%09red/K13129%09red/K12882%09re…
Phosphatidylinositol signaling system	KEGG PATHWAY	ko04070	37	53	3.363552894	1.82E-14	1	K00913:ITPK1|K02677:PRKCA|K03084:INPP5D|K01116:PLCG1,LOC101792010|K00915:IPMK|K00911:ITPKB,ITPKA|K13711:PI4K2B|K20278:INPP5E|K20279:SYNJ2,ceb61a56-1039-4b2a-9b62-1708c0788339,SYNJ1|K05860:PLCE1|K13024:PPIP5K1,PPIP5K2|K00889:PIP5K1C,PIP5K1A|K07756:IP6K2,IP6K1,IP6K3|K01110:PTEN|K02649:PIK3R5,PIK3R2,PIK3R1,LOC101795759|K02183:LOC101805317,CALM2,CALM1|K01109:INPP4A|K01108:MTM1|K10572:IPPK|K01106:INPP…	https://www.kegg.jp/kegg-bin/show_pathway?ko04070/K00913%09red/K02677%09red/K03084%09red/K01116%09red/K00915%09red/K00911%09red/K13711%09red/K20278%09red/K20279%09red/K05860%09red/K13024%09red/K00889%09red/K07756%09red/K01110%09red/K02649%09red/K02183%09red/K01109%09red/K01108%09red/K10572%09red/K01106%09red/K05857%09red/K00921%09red/K00922%09red/K00923%09red/K00901%09red/K05859%09red/K05858%09re…
Choline metabolism in cancer	KEGG PATHWAY	ko05231	39	61	3.080400457	2.99E-13	1	K02677:PRKCA|K01116:PLCG1,LOC101792010|K01115:PLD1,e52d0119-c13a-4e50-baa5-40ad0b36e494|K04448:JUN|K05748:WASF2|K04357:EGF|K08732:RALGDS|K04359:PDGFA|K17386:PDGFB|K08202:SLC22A4|K16342:PLA2G4B|K04440:MAPK9,MAPK8|K07861:RAC3|K15377:SLC44A2|K06083:WASF3|K05753:WASF1|K02649:PIK3R5,PIK3R2,PIK3R1,LOC101795759|K03099:SOS1,SOS2|K00968:PCYT1A,PCYT1B|K04688:RPS6KB1|K01080:PLPP3|K00922:PIK3CA,PIK3CB,PIK3CD…	https://www.kegg.jp/kegg-bin/show_pathway?ko05231/K02677%09red/K01116%09red/K01115%09red/K04448%09red/K05748%09red/K04357%09red/K08732%09red/K04359%09red/K17386%09red/K08202%09red/K16342%09red/K04440%09red/K07861%09red/K15377%09red/K06083%09red/K05753%09red/K02649%09red/K03099%09red/K00968%09red/K04688%09red/K01080%09red/K00922%09red/K00901%09red/K07827%09red/K05747%09red/K05450%09red/K05089%09re…
Chronic myeloid leukemia	KEGG PATHWAY	ko05220	37	57	3.127514094	6.09E-13	1	K08878:BCR|K04734:NFKBIA|K04438:CRKL,CRK|K06067:HDAC2|K02091:CDK6|K06618:RB1|K04496:CTBP1,CTBP2|K17454:E2F1|K06619:ABL1|K04707:a9896c52-0482-44eb-b8bb-298e5bb6d323,CBLB|K07293:LOC101789439|K02649:PIK3R5,PIK3R2,PIK3R1,LOC101795759|K09389:29befb83-4d49-48c6-8da4-9559c88e094d,E2F2|K03099:SOS1,SOS2|K04503:CCND1|K04501:SMAD4|K04462:MECOM|K00922:PIK3CA,PIK3CB,PIK3CD,PIK3CG|K13377:f2baadea-afef-4d7c-8b7…	https://www.kegg.jp/kegg-bin/show_pathway?ko05220/K08878%09red/K04734%09red/K04438%09red/K06067%09red/K02091%09red/K06618%09red/K04496%09red/K17454%09red/K06619%09red/K04707%09red/K07293%09red/K02649%09red/K09389%09red/K03099%09red/K04503%09red/K04501%09red/K04462%09red/K00922%09red/K13377%09red/K02833%09red/K04388%09red/K07209%09red/K07827%09red/K04674%09red/K06643%09red/K04456%09red/K04570%09re…
Gap junction	KEGG PATHWAY	ko04540	37	59	3.021496667	2.90E-12	1	K04359:PDGFA|K08959:CSNK1D|K02677:PRKCA|K07376:PRKG1,fda8dece-820b-46c6-a570-bf8ffaebfbcd|K08042:ADCY2|K07372:GJA1|K08047:ADCY7|K08045:ADCY5|K08049:ADCY9|K07373:GJD2|K07374:LOC101797289,LOC101804924,LOC101802038|K07375:TUBB3,TUBB4B,TUBB6,LOC101802187,7e46c545-31b3-4dc9-b54c-dd92d2947210|K17386:PDGFB|K04141:ADRB1|K03099:SOS1,SOS2|K04289:LPAR1|K04357:EGF|K07827:KRAS|K05858:PLCB1,PLCB4,PLCB2|K04345:…	https://www.kegg.jp/kegg-bin/show_pathway?ko04540/K04359%09red/K08959%09red/K02677%09red/K07376%09red/K08042%09red/K07372%09red/K08047%09red/K08045%09red/K08049%09red/K07373%09red/K07374%09red/K07375%09red/K17386%09red/K04141%09red/K03099%09red/K04289%09red/K04357%09red/K07827%09red/K05858%09red/K04345%09red/K05450%09red/K05089%09red/K19662%09red/K04366%09red/K05701%09red/K04958%09red/K05704%09re…
Small cell lung cancer	KEGG PATHWAY	ko05222	39	66	2.847036786	1.09E-11	1	K01110:PTEN|K04734:NFKBIA|K05636:LAMB1|K08528:RARB|K02091:CDK6|K08524:RXRA,c1d0c671-20aa-4705-8c5b-b54c1ca490b3|K04503:CCND1|K06618:RB1|K05719:ITGB1|K06487:ITGAV|K05717:FN1|K09848:TRAF4|K08738:LOC113841161,CYC|K05635:LAMC1|K17454:E2F1|K06241:LAMA4|K09849:TRAF5|K06244:LAMB3|K06243:6c32367a-4492-49c8-b38e-0202af4580b6,LAMB2|K02649:PIK3R5,PIK3R2,PIK3R1,LOC101795759|K06240:LAMA5|K09389:29befb83-4d49-…	https://www.kegg.jp/kegg-bin/show_pathway?ko05222/K01110%09red/K04734%09red/K05636%09red/K08528%09red/K02091%09red/K08524%09red/K04503%09red/K06618%09red/K05719%09red/K06487%09red/K05717%09red/K09848%09red/K08738%09red/K05635%09red/K17454%09red/K06241%09red/K09849%09red/K06244%09red/K06243%09red/K02649%09red/K06240%09red/K09389%09red/K16063%09red/K16060%09red/K04725%09red/K00922%09red/K02161%09re…
Dopaminergic synapse	KEGG PATHWAY	ko04728	45	83	2.612202427	1.75E-11	1	K04515:LOC113845138,CAMK2G|K04538:GNB4|K02677:PRKCA|K04534:LOC101791437,LOC113844914|K03083:GSK3B|K05870:CREB1|K10396:KIF5B,KIF5C|K08045:ADCY5|K04354:PPP2R2B,PPP2R2C|K05840:DRD5|K04441:MAPK12,MAPK14|K04440:MAPK9,MAPK8|K04536:GNB1|K00545:COMT|K11583:PPP2R3A,PPP2R3B|K11584:PPP2R5A,PPP2R5D,PPP2R5E,PPP2R5C|K04374:8ddd9e5e-2fd9-47f0-8e91-e094ab22b3c5|K02183:LOC101805317,CALM2,CALM1|K05197:GRIA1|K09048…	https://www.kegg.jp/kegg-bin/show_pathway?ko04728/K04515%09red/K04538%09red/K02677%09red/K04534%09red/K03083%09red/K05870%09red/K10396%09red/K08045%09red/K04354%09red/K05840%09red/K04441%09red/K04440%09red/K04536%09red/K00545%09red/K11583%09red/K11584%09red/K04374%09red/K02183%09red/K05197%09red/K09048%09red/K05210%09red/K04997%09red/K04543%09red/K09047%09red/K04546%09red/K05198%09red/K05199%09re…
Apoptosis	KEGG PATHWAY	ko04210	53	109	2.342727518	7.11E-11	1	K02373:FADD|K16341:BCL2L11|K02374:PTPN13|K01365:CTSL|K01367:LOC113843044|K04734:NFKBIA|K08852:ERN1|K04390:FAS|K04448:JUN|K04398:CASP8|K08568:CTSZ|K02861:RIPK1|K12641:LMNA|K04400:LOC101799731|K04440:MAPK9,MAPK8|K10798:PARP3,PARP1|K07374:LOC101797289,LOC101804924,LOC101802038|K08738:LOC113841161,CYC|K01275:CTSC|K10522:DIABLO|K02186:CASP2|K02187:CASP3|K01374:CTSO|K02649:PIK3R5,PIK3R2,PIK3R1,LOC10179…	https://www.kegg.jp/kegg-bin/show_pathway?ko04210/K02373%09red/K16341%09red/K02374%09red/K01365%09red/K01367%09red/K04734%09red/K08852%09red/K04390%09red/K04448%09red/K04398%09red/K08568%09red/K02861%09red/K12641%09red/K04400%09red/K04440%09red/K10798%09red/K07374%09red/K08738%09red/K01275%09red/K10522%09red/K02186%09red/K02187%09red/K01374%09red/K02649%09red/K08860%09red/K04728%09red/K04721%09re…
MicroRNAs in cancer	KEGG PATHWAY	ko05206	87	228	1.838471123	8.91E-10	1	K01110:PTEN|K01116:PLCG1,LOC101792010|K11459:BMI1|K02091:CDK6|K05448:VEGFA|K17454:E2F1|K06619:ABL1|K16341:BCL2L11|K12886:HNRNPK|K08007:EZR|K04377:e9e98afd-35da-4c3b-b53e-531ca047a91b|K04702:PIM1|K02539:MCL1|K02085:APC2,APC,94caf6ee-5bd3-4149-b3fb-b9adb3de19ca|K02329:FZD3|K08270:DDIT4|K05859:PLCG2|K11592:DICER1,cc6466a1-2fbf-44a4-8c66-f8312511b733|K04671:BMPR2|K17442:ZFPM2|K02833:HRAS|K17449:SHC4|…	https://www.kegg.jp/kegg-bin/show_pathway?ko05206/K01110%09red/K01116%09red/K11459%09red/K02091%09red/K05448%09red/K17454%09red/K06619%09red/K16341%09red/K12886%09red/K08007%09red/K04377%09red/K04702%09red/K02539%09red/K02085%09red/K02329%09red/K08270%09red/K05859%09red/K11592%09red/K04671%09red/K17442%09red/K02833%09red/K17449%09red/K06279%09red/K04514%09red/K04694%09red/K04692%09red/K04513%09re…
Progesterone-mediated oocyte maturation	KEGG PATHWAY	ko04914	33	59	2.694848379	3.03E-09	1	K05087:IGF1R,a00f0252-04ca-4c37-b932-f1fdc0be18f9|K03351:ANAPC4|K12456:ANAPC13|K08042:ADCY2|K08047:ADCY7|K05868:CCNB2|K13296:e6ab3f9e-964b-4bae-86fb-10b89616bc6e,PDE3B|K05867:LOC106017999|K08049:ADCY9|K03350:CDC27|K04441:MAPK12,MAPK14|K04440:MAPK9,MAPK8|K03354:ANAPC7|K03355:CDC23|K02602:CPEB4,CPEB2,CPEB3|K04373:RPS6KA6,RPS6KA2,RPS6KA3|K03359:CDC26|K02649:PIK3R5,PIK3R2,PIK3R1,LOC101795759|K06638:M…	https://www.kegg.jp/kegg-bin/show_pathway?ko04914/K05087%09red/K03351%09red/K12456%09red/K08042%09red/K08047%09red/K05868%09red/K13296%09red/K05867%09red/K08049%09red/K03350%09red/K04441%09red/K04440%09red/K03354%09red/K03355%09red/K02602%09red/K04373%09red/K03359%09red/K02649%09red/K06638%09red/K04365%09red/K03349%09red/K00922%09red/K04345%09red/K08045%09red/K08556%09red/K06645%09red/K04456%09re…
Long-term depression	KEGG PATHWAY	ko04730	27	45	2.890837352	1.05E-08	1	K05207:GRID2|K02677:PRKCA|K04534:LOC101791437,LOC113844914|K07376:PRKG1,fda8dece-820b-46c6-a570-bf8ffaebfbcd|K16342:PLA2G4B|K05197:GRIA1|K05198:GRIA2|K05199:GRIA3|K05854:LYN|K05858:PLCB1,PLCB4,PLCB2|K04346:GNA12|K07827:KRAS|K19662:PRKCB|K04366:RAF1|K04382:PPP2CA,PPP2CB|K05087:IGF1R,a00f0252-04ca-4c37-b932-f1fdc0be18f9|K04958:ITPR1|K04639:GNA13|K02833:HRAS|K12318:GUCY1A2,GUCY1A1|K12319:LOC10179651…	https://www.kegg.jp/kegg-bin/show_pathway?ko04730/K05207%09red/K02677%09red/K04534%09red/K07376%09red/K16342%09red/K05197%09red/K05198%09red/K05199%09red/K05854%09red/K05858%09red/K04346%09red/K07827%09red/K19662%09red/K04366%09red/K04382%09red/K05087%09red/K04958%09red/K04639%09red/K02833%09red/K12318%09red/K12319%09red/K04630%09red/K04632%09red/K04578%09red/K04634%09red/K04635%09red/K04365%09re…
Ribosome biogenesis in eukaryotes	KEGG PATHWAY	ko03008	40	82	2.35027427	1.35E-08	1	K11108:978a4abc-de5a-4bf6-a7ef-ce2a9f0e55ff|K11128:GAR1|K14545:RRP7A|K14572:MDN1|K14570:REXO1|K07562:NMD3|K14559:MPHOSPH10|K14574:SBDS|K14575:SPATA5|K14554:WDR36|K14556:WDR3,LOC113843286|K14552:WDR75|K14553:UTP18|K03537:POP5|K14285:NXT2|K14538:GNL3|K14539:LSG1|K14536:EFL1|K14537:GNL2|K03685:DROSHA|K07179:LOC113841641|K03097:CSNK2A1|K14571:NVL|K11131:DKC1|K14564:NOP56|K14560:IMP3|K14562:TCOF1|K145…	https://www.kegg.jp/kegg-bin/show_pathway?ko03008/K11108%09red/K11128%09red/K14545%09red/K14572%09red/K14570%09red/K07562%09red/K14559%09red/K14574%09red/K14575%09red/K14554%09red/K14556%09red/K14552%09red/K14553%09red/K03537%09red/K14285%09red/K14538%09red/K14539%09red/K14536%09red/K14537%09red/K03685%09red/K07179%09red/K03097%09red/K14571%09red/K11131%09red/K14564%09red/K14560%09red/K14562%09re…
Calcium signaling pathway	KEGG PATHWAY	ko04020	58	141	1.981897948	2.60E-08	1	K04515:LOC113845138,CAMK2G|K16059:STIM1|K16057:ORAI2|K02677:PRKCA|K01116:PLCG1,LOC101792010|K04363:PDGFRA|K00911:ITPKB,ITPKA|K07190:PHKA2|K13755:PDE1C,PDE1A|K08042:ADCY2|K04963:RYR3|K08047:ADCY7|K05840:DRD5|K08049:ADCY9|K05865:TNNC1|K05863:SLC25A6,SLC25A4|K05860:PLCE1|K04169:GRPR|K18196:STIM2|K04149:HRH1|K04279:DNAJC8|K05858:PLCB1,PLCB4,PLCB2|K04633:GNAL|K04142:LOC101800857|K06268:PPP3R1|K04166:A…	https://www.kegg.jp/kegg-bin/show_pathway?ko04020/K04515%09red/K16059%09red/K16057%09red/K02677%09red/K01116%09red/K04363%09red/K00911%09red/K07190%09red/K13755%09red/K08042%09red/K04963%09red/K08047%09red/K05840%09red/K08049%09red/K05865%09red/K05863%09red/K05860%09red/K04169%09red/K18196%09red/K04149%09red/K04279%09red/K05858%09red/K04633%09red/K04142%09red/K06268%09red/K04166%09red/K02183%09re…
B cell receptor signaling pathway	KEGG PATHWAY	ko04662	30	57	2.535822239	1.01E-07	1	K07861:RAC3|K03084:INPP5D|K03083:GSK3B|K05730:VAV2,VAV3|K07370:BTK|K05859:PLCG2|K04448:JUN|K06268:PPP3R1|K02649:PIK3R5,PIK3R2,PIK3R1,LOC101795759|K04446:NFATC1|K03099:SOS1,SOS2|K12362:RASGRP3|K07367:CARD11|K00922:PIK3CA,PIK3CB,PIK3CD,PIK3CG|K05854:LYN|K07369:MALT1|K07209:IKBKB|K12230:PIK3AP1|K06508:CD81|K19662:PRKCB|K04734:NFKBIA|K04348:PPP3CA,PPP3CB|K04456:AKT3,AKT1|K02833:HRAS|K17333:NFATC3|K17…	https://www.kegg.jp/kegg-bin/show_pathway?ko04662/K07861%09red/K03084%09red/K03083%09red/K05730%09red/K07370%09red/K05859%09red/K04448%09red/K06268%09red/K02649%09red/K04446%09red/K03099%09red/K12362%09red/K07367%09red/K00922%09red/K05854%09red/K07369%09red/K07209%09red/K12230%09red/K06508%09red/K19662%09red/K04734%09red/K04348%09red/K04456%09red/K02833%09red/K17333%09red/K17332%09red/K02580%09re…
Circadian rhythm	KEGG PATHWAY	ko04710	16	22	3.504045275	2.33E-07	1	K07200:PRKAG2|K02223:CLOCK|K03868:RBX1|K08959:CSNK1D|K03730:BHLHE41|K02295:CRY2,CRY1|K05870:CREB1|K02633:PER2,PER3|K07198:PRKAA1|K07199:PRKAB1,PRKAB2|K03347:CUL1|K08532:RORA|K08533:LOC101791228|K03362:FBXW11,BTRC|K09026:NPAS2|K10269:FBXL3	https://www.kegg.jp/kegg-bin/show_pathway?ko04710/K07200%09red/K02223%09red/K03868%09red/K08959%09red/K03730%09red/K02295%09red/K05870%09red/K02633%09red/K07198%09red/K07199%09red/K03347%09red/K08532%09red/K08533%09red/K03362%09red/K09026%09red/K10269%09red/
Adipocytokine signaling pathway	KEGG PATHWAY	ko04920	28	53	2.545391379	2.43E-07	1	K04692:STAT3|K05228:POMC|K04734:NFKBIA|K07198:PRKAA1|K07199:PRKAB1,PRKAB2|K08524:RXRA,c1d0c671-20aa-4705-8c5b-b54c1ca490b3|K05062:LEPR|K07359:CAMKK2,CAMKK1|K04440:MAPK9,MAPK8|K04447:JAK2|K07299:SLC2A1|K07298:STK11|K01897:ACSL3,ACSL4,ACSL6|K07294:PPARA|K07293:LOC101789439|K03158:LOC101801004|K07297:ADIPOR1|K03173:TRAF2|K03171:TRADD|K07187:IRS4,IRS2|K07209:IKBKB|K07200:PRKAG2|K01084:G6PC2|K07202:PP…	https://www.kegg.jp/kegg-bin/show_pathway?ko04920/K04692%09red/K05228%09red/K04734%09red/K07198%09red/K07199%09red/K08524%09red/K05062%09red/K07359%09red/K04440%09red/K04447%09red/K07299%09red/K07298%09red/K01897%09red/K07294%09red/K07293%09red/K03158%09red/K07297%09red/K03173%09red/K03171%09red/K07187%09red/K07209%09red/K07200%09red/K01084%09red/K07202%09red/K07203%09red/K16172%09red/K04456%09re…
RNA degradation	KEGG PATHWAY	ko03018	36	78	2.22372104	4.09E-07	1	K03678:EXOSC9|K00850:PFKL,PFKP|K12604:CNOT1|K12615:EDC3|K12614:DDX6|K12617:PATL2|K12616:EDC4|K12592:C1D|K12593:MPHOSPH6|K12613:DCP2|K12591:EXOSC10|K12598:MTREX|K18681:DIS3L|K04043:HSPA9|K12605:CNOT2|K03514:TENT4B|K03681:EXOSC3|K13126:PABPC4,PABPC1|K00962:PNPT1|K01148:PARN|K12585:DIS3|K12587:EXOSC6|K12623:LSM4|K12581:CNOT8|K12626:LSM7|K04077:HSPD1|K12589:EXOSC7|K14443:TOB1,BTG2,BTG1,TOB2|K12597:ZC…	https://www.kegg.jp/kegg-bin/show_pathway?ko03018/K03678%09red/K00850%09red/K12604%09red/K12615%09red/K12614%09red/K12617%09red/K12616%09red/K12592%09red/K12593%09red/K12613%09red/K12591%09red/K12598%09red/K18681%09red/K04043%09red/K12605%09red/K03514%09red/K03681%09red/K13126%09red/K00962%09red/K01148%09red/K12585%09red/K12587%09red/K12623%09red/K12581%09red/K12626%09red/K04077%09red/K12589%09re…
Influenza A	KEGG PATHWAY	ko05164	50	124	1.942767038	4.87E-07	1	K16196:EIF2AK4|K16194:EIF2AK1|K04430:MAP2K4|K02677:PRKCA|K03083:GSK3B|K11220:STAT1|K04390:FAS|K12653:NLRX1|K10054:LOC101796105,PML|K12968:ADAR|K12800:LOC101795933|K08738:LOC113841161,CYC|K04441:MAPK12,MAPK14|K04440:MAPK9,MAPK8|K04447:JAK2|K14285:NXT2|K05130:IFNAR1|K05131:IFNAR2|K05132:IFNGR1|K05133:IFNGR2|K02649:PIK3R5,PIK3R2,PIK3R1,LOC101795759|K08860:EIF2AK3|K04721:TNFSF10|K01165:RNASEL|K05692:…	https://www.kegg.jp/kegg-bin/show_pathway?ko05164/K16196%09red/K16194%09red/K04430%09red/K02677%09red/K03083%09red/K11220%09red/K04390%09red/K12653%09red/K10054%09red/K12968%09red/K12800%09red/K08738%09red/K04441%09red/K04440%09red/K04447%09red/K14285%09red/K05130%09red/K05131%09red/K05132%09red/K05133%09red/K02649%09red/K08860%09red/K04721%09red/K01165%09red/K05692%09red/K03158%09red/K01370%09re…
Fc gamma R-mediated phagocytosis	KEGG PATHWAY	ko04666	29	58	2.409031127	6.84E-07	1	K02677:PRKCA|K03084:INPP5D|K01116:PLCG1,LOC101792010|K04438:CRKL,CRK|K01115:PLD1,e52d0119-c13a-4e50-baa5-40ad0b36e494|K18050:PRKCE,5ad0a8fe-8aee-43af-8b2a-d5840b109e92|K05730:VAV2,VAV3|K05758:ARPC2|K12488:LOC101802747,ASAP3,ASAP1,ASAP2|K01080:PLPP3|K12562:BIN1|K06083:WASF3|K05753:WASF1|K05754:ARPC5L,ARPC5|K02649:PIK3R5,PIK3R2,PIK3R1,LOC101795759|K04688:RPS6KB1|K00922:PIK3CA,PIK3CB,PIK3CD,PIK3CG|K…	https://www.kegg.jp/kegg-bin/show_pathway?ko04666/K02677%09red/K03084%09red/K01116%09red/K04438%09red/K01115%09red/K18050%09red/K05730%09red/K05758%09red/K12488%09red/K01080%09red/K12562%09red/K06083%09red/K05753%09red/K05754%09red/K02649%09red/K04688%09red/K00922%09red/K05854%09red/K12561%09red/K05859%09red/K05747%09red/K05744%09red/K19662%09red/K05748%09red/K04456%09red/K00889%09red/K07941%09re…
Alzheimer's disease	KEGG PATHWAY	ko05010	52	141	1.776874023	6.84E-06	1	K02373:FADD|K02256:COX1|K08860:EIF2AK3|K04550:LRP1,59c65c64-d9a2-41c4-a184-7509d47b0aad|K01367:LOC113843044|K03083:GSK3B|K08852:ERN1|K09054:ATF6|K02187:CASP3|K04390:FAS|K02270:LOC101796089|K02137:ATP5PO|K04398:CASP8|K03961:NDUFB5|K04963:RYR3|K03965:LOC101800441|K03967:NDUFC1|K03966:NDUFB10|K08738:LOC113841161,CYC|K02127:ATP5PB|K03934:NDUFS1|K11716:CDK5R1|K05858:PLCB1,PLCB4,PLCB2|K06268:PPP3R1|K02…	https://www.kegg.jp/kegg-bin/show_pathway?ko05010/K02373%09red/K02256%09red/K08860%09red/K04550%09red/K01367%09red/K03083%09red/K08852%09red/K09054%09red/K02187%09red/K04390%09red/K02270%09red/K02137%09red/K04398%09red/K03961%09red/K04963%09red/K03965%09red/K03967%09red/K03966%09red/K08738%09red/K02127%09red/K03934%09red/K11716%09red/K05858%09red/K06268%09red/K02183%09red/K04520%09red/K04521%09re…
Endocrine and other factor-regulated calcium reabsorption	KEGG PATHWAY	ko04961	17	29	2.824381321	9.15E-06	1	K01539:ATP1A1|K11824:AP2A2|K04645:LOC113839618|K04644:LOC101793731|K19662:PRKCB|K02677:PRKCA|K08049:ADCY9|K04646:CLTCL1|K01540:ATP1B3,ATP1B1|K05858:PLCB1,PLCB4,PLCB2|K04345:PRKACB|K11826:AP2M1|K11825:AP2B1|K04585:PTH1R|K04634:LOC101794123,LOC101790479|K04632:GNAS|K01528:DNM1	https://www.kegg.jp/kegg-bin/show_pathway?ko04961/K01539%09red/K11824%09red/K04645%09red/K04644%09red/K19662%09red/K02677%09red/K08049%09red/K04646%09red/K01540%09red/K05858%09red/K04345%09red/K11826%09red/K11825%09red/K04585%09red/K04634%09red/K04632%09red/K01528%09red/
N-Glycan biosynthesis	KEGG PATHWAY	ko00510	22	43	2.465055106	9.39E-06	1	K07966:B4GALT1|K00744:MGAT5|K07252:DOLPP1|K09661:MGAT5B|K03843:ALG2|K03844:ALG11|K03845:ALG3|K03848:ALG6|K00721:DPM1|K07151:STT3A,STT3B|K01231:MAN2A2|K01230:MAN1A2|K01001:DPAGT1|K12666:RPN1|K12667:RPN2|K00717:FUT8|K00902:DOLK|K00779:ST6GAL2|K00738:MGAT4B|K00737:MGAT3|K00736:MGAT2|K13748:LOC101799353	https://www.kegg.jp/kegg-bin/show_pathway?ko00510/K07966%09red/K00744%09red/K07252%09red/K09661%09red/K03843%09red/K03844%09red/K03845%09red/K03848%09red/K00721%09red/K07151%09red/K01231%09red/K01230%09red/K01001%09red/K12666%09red/K12667%09red/K00717%09red/K00902%09red/K00779%09red/K00738%09red/K00737%09red/K00736%09red/K13748%09red/
Central carbon metabolism in cancer	KEGG PATHWAY	ko05230	23	46	2.409031127	9.70E-06	1	K00850:PFKL,PFKP|K11413:SIRT3|K01110:PTEN|K00873:PKM|K05099:MET|K14634:TIGAR|K05091:KIT|K08180:SLC16A3|K05094:FGFR3|K07299:SLC2A1|K04377:e9e98afd-35da-4c3b-b53e-531ca047a91b|K00844:LOC101794107,LOC101794283|K00922:PIK3CA,PIK3CB,PIK3CD,PIK3CG|K04361:EGFR|K05089:PDGFRB|K07203:MTOR|K13780:SLC7A5|K04456:AKT3,AKT1|K02833:HRAS|K02649:PIK3R5,PIK3R2,PIK3R1,LOC101795759|K04363:PDGFRA|K07827:KRAS|K04366:RA…	https://www.kegg.jp/kegg-bin/show_pathway?ko05230/K00850%09red/K11413%09red/K01110%09red/K00873%09red/K05099%09red/K14634%09red/K05091%09red/K08180%09red/K05094%09red/K07299%09red/K04377%09red/K00844%09red/K00922%09red/K04361%09red/K05089%09red/K07203%09red/K13780%09red/K04456%09red/K02833%09red/K02649%09red/K04363%09red/K07827%09red/K04366%09red/
Inflammatory mediator regulation of TRP channels	KEGG PATHWAY	ko04750	29	67	2.085429931	2.49E-05	1	K04515:LOC113845138,CAMK2G|K05222:TRPV1|K02677:PRKCA|K01116:PLCG1,LOC101792010|K18050:PRKCE,5ad0a8fe-8aee-43af-8b2a-d5840b109e92|K04386:LOC101794359,LOC101794055|K04829:ASIC1|K08042:ADCY2|K08047:ADCY7|K08045:ADCY5|K08049:ADCY9|K16342:PLA2G4B|K04441:MAPK12,MAPK14|K04440:MAPK9,MAPK8|K04149:HRH1|K06269:PPP1CB|K02649:PIK3R5,PIK3R2,PIK3R1,LOC101795759|K02183:LOC101805317,CALM2,CALM1|K04723:IL1RAP|K009…	https://www.kegg.jp/kegg-bin/show_pathway?ko04750/K04515%09red/K05222%09red/K02677%09red/K01116%09red/K18050%09red/K04386%09red/K04829%09red/K08042%09red/K08047%09red/K08045%09red/K08049%09red/K16342%09red/K04441%09red/K04440%09red/K04149%09red/K06269%09red/K02649%09red/K02183%09red/K04723%09red/K00922%09red/K05859%09red/K05858%09red/K04345%09red/K19662%09red/K04958%09red/K04971%09red/K05704%09re…
NF-kappa B signaling pathway	KEGG PATHWAY	ko04064	35	87	1.938300907	2.60E-05	1	K16072:ERC1|K10577:UBE2I|K12793:TAB3|K01116:PLCG1,LOC101792010|K04427:LOC101800996|K03174:TRAF3|K10160:TLR4|K03160:CD40|K10031:CXCL12|K02861:RIPK1|K07370:BTK|K09849:TRAF5|K05859:PLCG2|K04728:ATM|K04734:NFKBIA|K16060:BIRC2|K03097:CSNK2A1|K04404:TAB2|K03158:LOC101801004|K04725:XIAP|K07367:CARD11|K05854:LYN|K04466:MAP3K14|K02161:BCL2|K03173:TRAF2|K03171:TRADD|K12646:DDX58|K07369:MALT1|K03175:TRAF6|K…	https://www.kegg.jp/kegg-bin/show_pathway?ko04064/K16072%09red/K10577%09red/K12793%09red/K01116%09red/K04427%09red/K03174%09red/K10160%09red/K03160%09red/K10031%09red/K02861%09red/K07370%09red/K09849%09red/K05859%09red/K04728%09red/K04734%09red/K16060%09red/K03097%09red/K04404%09red/K03158%09red/K04725%09red/K07367%09red/K05854%09red/K04466%09red/K02161%09red/K03173%09red/K03171%09red/K12646%09re…
Shigellosis	KEGG PATHWAY	ko05131	27	64	2.032620013	8.09E-05	1	K04514:ROCK1|K07863:RHOG|K04734:NFKBIA|K04438:CRKL,CRK|K05748:WASF2|K17388:ROCK2|K05719:ITGB1|K05759:PFN2|K06106:LOC101793940,CTTN|K05758:ARPC2|K06619:ABL1|K04441:MAPK12,MAPK14|K04440:MAPK9,MAPK8|K05753:WASF1|K05754:ARPC5L,ARPC5|K13708:DOCK1,LOC113843992|K12366:ELMO1|K05692:ACTB|K08846:LOC101797616,RIPK2|K05747:WASL|K07209:IKBKB|K05700:VCL|K05704:SRC|K08339:ATG5|K06256:CD44|K02580:NFKB1|K03362:FB…	https://www.kegg.jp/kegg-bin/show_pathway?ko05131/K04514%09red/K07863%09red/K04734%09red/K04438%09red/K05748%09red/K17388%09red/K05719%09red/K05759%09red/K06106%09red/K05758%09red/K06619%09red/K04441%09red/K04440%09red/K05753%09red/K05754%09red/K13708%09red/K12366%09red/K05692%09red/K08846%09red/K05747%09red/K07209%09red/K05700%09red/K05704%09red/K08339%09red/K06256%09red/K02580%09red/K03362%09re…
Amoebiasis	KEGG PATHWAY	ko05146	32	81	1.903432001	8.62E-05	1	K02677:PRKCA|K02187:CASP3|K10159:LOC110351185|K07888:LOC113840038|K07887:RAB5A|K05717:FN1|K05636:LAMB1|K05635:LAMC1|K06244:LAMB3|K06243:6c32367a-4492-49c8-b38e-0202af4580b6,LAMB2|K02649:PIK3R5,PIK3R2,PIK3R1,LOC101795759|K06240:LAMA5|K05699:ACTN2,ACTN1|K00922:PIK3CA,PIK3CB,PIK3CD,PIK3CG|K10160:TLR4|K13377:f2baadea-afef-4d7c-8b77-f8b2dcf93f44|K07897:RAB7A|K05858:PLCB1,PLCB4,PLCB2|K04345:PRKACB|K133…	https://www.kegg.jp/kegg-bin/show_pathway?ko05146/K02677%09red/K02187%09red/K10159%09red/K07888%09red/K07887%09red/K05717%09red/K05636%09red/K05635%09red/K06244%09red/K06243%09red/K02649%09red/K06240%09red/K05699%09red/K00922%09red/K10160%09red/K13377%09red/K07897%09red/K05858%09red/K04345%09red/K13376%09red/K05725%09red/K19662%09red/K05700%09red/K04386%09red/K06237%09red/K04455%09red/K06241%09re…
Natural killer cell mediated cytotoxicity	KEGG PATHWAY	ko04650	33	85	1.870541816	0.000100498	1	K07984:SH3BP2|K07861:RAC3|K01116:PLCG1,LOC101792010|K04390:FAS|K05730:VAV2,VAV3|K06516:LOC101791902|K04446:NFATC1|K02677:PRKCA|K05130:IFNAR1|K05131:IFNAR2|K05132:IFNGR1|K05133:IFNGR2|K07293:LOC101789439|K06268:PPP3R1|K02649:PIK3R5,PIK3R2,PIK3R1,LOC101795759|K03099:SOS1,SOS2|K04365:BRAF|K04721:TNFSF10|K00922:PIK3CA,PIK3CB,PIK3CD,PIK3CG|K07361:LCP2|K05859:PLCG2|K02187:CASP3|K19662:PRKCB|K05703:FYN|…	https://www.kegg.jp/kegg-bin/show_pathway?ko04650/K07984%09red/K07861%09red/K01116%09red/K04390%09red/K05730%09red/K06516%09red/K04446%09red/K02677%09red/K05130%09red/K05131%09red/K05132%09red/K05133%09red/K07293%09red/K06268%09red/K02649%09red/K03099%09red/K04365%09red/K04721%09red/K00922%09red/K07361%09red/K05859%09red/K02187%09red/K19662%09red/K05703%09red/K04348%09red/K02833%09red/K17447%09re…
GABAergic synapse	KEGG PATHWAY	ko04727	27	65	2.001348936	0.000111265	1	K14990:SLC38A1|K04538:GNB4|K02677:PRKCA|K04534:LOC101791437,LOC113844914|K01580:GAD1|K01915:GLUL|K08042:ADCY2|K08047:ADCY7|K08045:ADCY5|K05175:GABRA3|K08049:ADCY9|K14207:SLC38A2|K08341:GABARAPL2,GABARAPL1|K04536:GNB1|K15374:TRAK2|K05192:LOC101802647|K04543:GNG7|K04546:LOC101794407|K04850:CACNA1C|K04345:PRKACB|K04347:GNG12|K19662:PRKCB|K04857:CACNA1S|K05704:SRC|K05000:KCNJ6|K04630:GNAI3|K07826:GNG2	https://www.kegg.jp/kegg-bin/show_pathway?ko04727/K14990%09red/K04538%09red/K02677%09red/K04534%09red/K01580%09red/K01915%09red/K08042%09red/K08047%09red/K08045%09red/K05175%09red/K08049%09red/K14207%09red/K08341%09red/K04536%09red/K15374%09red/K05192%09red/K04543%09red/K04546%09red/K04850%09red/K04345%09red/K04347%09red/K19662%09red/K04857%09red/K05704%09red/K05000%09red/K04630%09red/K07826%09re…
Mucin type O-Glycan biosynthesis	KEGG PATHWAY	ko00512	8	11	3.504045275	0.000306333	1	K00727:1d0b6bb0-92e2-4ed4-a489-2fc3e1d72af7|K00731:C1GALT1|K00780:ST3GAL1|K03368:ST3GAL2|K00710:GALNT10,GALNT17,GALNT11,GALNT1,GALNT2,GALNT14,GALNT7,GALNT13,GALNT16,GALNT18,LOC113844188|K09905:B4GALT5|K03479:ST6GALNAC1|K09663:GCNT4	https://www.kegg.jp/kegg-bin/show_pathway?ko00512/K00727%09red/K00731%09red/K00780%09red/K03368%09red/K00710%09red/K09905%09red/K03479%09red/K09663%09red/
Other types of O-glycan biosynthesis	KEGG PATHWAY	ko00514	15	31	2.331320445	0.000544843	1	K05948:LFNG,RFNG,MFNG|K07632:FUT4|K03691:POFUT2|K00728:POMT2|K11703:COLGALT2|K00735:B3GAT1|K18134:EOGT|K07966:B4GALT1|K13676:GXYLT1,GXYLT2|K00781:ST3GAL3|K00779:ST6GAL2|K09666:POMGNT1|K09667:OGT|K09661:MGAT5B|K09674:CHST10	https://www.kegg.jp/kegg-bin/show_pathway?ko00514/K05948%09red/K07632%09red/K03691%09red/K00728%09red/K11703%09red/K00735%09red/K18134%09red/K07966%09red/K13676%09red/K00781%09red/K00779%09red/K09666%09red/K09667%09red/K09661%09red/K09674%09red/
Pancreatic secretion	KEGG PATHWAY	ko04972	25	67	1.797784423	0.001321549	1	K04513:RHOA|K02677:PRKCA|K08042:ADCY2|K04964:TRPC1|K08045:ADCY5|K08049:ADCY9|K10951:SLC12A2|K01047:PROCA1|K13575:SLC4A4|K07836:RAP1B|K01539:ATP1A1|K05031:CFTR|K05853:ATP2A2|K04936:KCNMA1|K05850:ATP2B2,5f0f6416-49e8-40d5-a6e9-7e3b2c79280e,ATP2B1|K08047:ADCY7|K04632:GNAS|K05858:PLCB1,PLCB4,PLCB2|K05742:SLC9A1|K19662:PRKCB|K04131:CHRM3|K04958:ITPR1|K01540:ATP1B3,ATP1B1|K07901:RAB8A|K04634:LOC1017941…	https://www.kegg.jp/kegg-bin/show_pathway?ko04972/K04513%09red/K02677%09red/K08042%09red/K04964%09red/K08045%09red/K08049%09red/K10951%09red/K01047%09red/K13575%09red/K07836%09red/K01539%09red/K05031%09red/K05853%09red/K04936%09red/K05850%09red/K08047%09red/K04632%09red/K05858%09red/K05742%09red/K19662%09red/K04131%09red/K04958%09red/K01540%09red/K07901%09red/K04634%09red/
NOD-like receptor signaling pathway	KEGG PATHWAY	ko04621	20	51	1.889436178	0.001954475	1	K07209:IKBKB|K04427:LOC101800996|K04404:TAB2|K04734:NFKBIA|K16060:BIRC2|K09487:HSP90B1|K12800:LOC101795933|K12804:PSTPIP1|K12793:TAB3|K12794:CARD9|K08846:LOC101797616,RIPK2|K01370:LOC101789899|K12795:SUGT1|K04441:MAPK12,MAPK14|K04440:MAPK9,MAPK8|K12796:ERBIN,ca866463-06ea-42dc-a90e-eb9947eba55f|K04079:HSP90AB1,HSP90AA1|K02580:NFKB1|K04398:CASP8|K03175:TRAF6	https://www.kegg.jp/kegg-bin/show_pathway?ko04621/K07209%09red/K04427%09red/K04404%09red/K04734%09red/K16060%09red/K09487%09red/K12800%09red/K12804%09red/K12793%09red/K12794%09red/K08846%09red/K01370%09red/K12795%09red/K04441%09red/K04440%09red/K12796%09red/K04079%09red/K02580%09red/K04398%09red/K03175%09red/
Dorso-ventral axis formation	KEGG PATHWAY	ko04320	11	24	2.208278533	0.005067483	1	K03211:ETV6|K07827:KRAS|K03099:SOS1,SOS2|K02678:ETS1,ETS2|K02599:NOTCH1,3f50d37a-8ae7-4dd6-bf24-eb637056bec5,NOTCH2,bc350cc2-5988-4ae1-944d-1db3e93c8ced|K04364:GRB2|K02184:FMN2|K02602:CPEB4,CPEB2,CPEB3|K04361:EGFR|K02098:SPIRE1|K04365:BRAF	https://www.kegg.jp/kegg-bin/show_pathway?ko04320/K03211%09red/K07827%09red/K03099%09red/K02678%09red/K02599%09red/K04364%09red/K02184%09red/K02602%09red/K04361%09red/K02098%09red/K04365%09red/
Cytokine-cytokine receptor interaction	KEGG PATHWAY	ko04060	61	225	1.306230211	0.01270663	1	K05062:LEPR|K05461:KITLG|K04667:INHBA|K04390:FAS|K05448:VEGFA|K13596:ACVR2B|K03160:CD40|K13376:TGFB2|K10033:CXCL14|K10031:CXCL12|K05099:MET|K05098:KDR|K04357:EGF|K05157:LOC113843349,LOC101801232|K05155:TNFRSF19|K04673:BMPR1A|K04662:BMP2,BMP4|K04359:PDGFA|K05097:FLT4|K05096:LOC101797327,FLT1|K17386:PDGFB|K05173:IL18R1|K05508:CX3CL1|K05420:CNTF|K13578:BMPR1B|K05130:IFNAR1|K05131:IFNAR2|K05132:IFNGR…	https://www.kegg.jp/kegg-bin/show_pathway?ko04060/K05062%09red/K05461%09red/K04667%09red/K04390%09red/K05448%09red/K13596%09red/K03160%09red/K13376%09red/K10033%09red/K10031%09red/K05099%09red/K05098%09red/K04357%09red/K05157%09red/K05155%09red/K04673%09red/K04662%09red/K04359%09red/K05097%09red/K05096%09red/K17386%09red/K05173%09red/K05508%09red/K05420%09red/K13578%09red/K05130%09red/K05131%09re…
Peroxisome	KEGG PATHWAY	ko04146	23	72	1.53910322	0.017090859	1	K00624:CRAT|K05677:ABCD3|K05676:367a636d-e7da-4979-a219-b8a36091a92f,ABCD2|K04565:SOD1|K01578:MLYCD|K13340:PEX26|K07753:PECR|K13343:PEX14|K13344:PEX13|K00031:IDH2,IDH1|K12261:HACL1|K01897:ACSL3,ACSL4,ACSL6|K13335:PEX16|K06664:PEX2|K13351:PEX11A|K13339:PEX6|K05940:CROT|K08764:SCP2|K11992:ACOT8|K00232:ACOX1|K13338:PEX1|K00106:XDH|K07513:ACAA1	https://www.kegg.jp/kegg-bin/show_pathway?ko04146/K00624%09red/K05677%09red/K05676%09red/K04565%09red/K01578%09red/K13340%09red/K07753%09red/K13343%09red/K13344%09red/K00031%09red/K12261%09red/K01897%09red/K13335%09red/K06664%09red/K13351%09red/K13339%09red/K05940%09red/K08764%09red/K11992%09red/K00232%09red/K13338%09red/K00106%09red/K07513%09red/
Regulation of autophagy	KEGG PATHWAY	ko04140	9	24	1.806773345	0.044657578	1	K17889:ATG14|K17890:ATG16L1|K08339:ATG5|K08341:GABARAPL2,GABARAPL1|K08269:ULK1,ULK2|K08343:ATG3|K07198:PRKAA1|K08333:PIK3R4|K08334:BECN1	https://www.kegg.jp/kegg-bin/show_pathway?ko04140/K17889%09red/K17890%09red/K08339%09red/K08341%09red/K08269%09red/K08343%09red/K07198%09red/K08333%09red/K08334%09red/
