# Supplementary material for: Profiling Analysis of N6-Methyladenosine mRNA Methylation Reveals Differential m6A Patterns during the Embryonic Skeletal Muscle Development of Ducks
Source: Animals (Basel). 2022 Sep 28;12(19):2593. doi: 10.3390/ani12192593 (PMC9559603; doi:10.3390/ani12192593)
Supplement: Supplementary file 1 [file animals-12-02593-s001.zip › Table S7.xls]

Term	Database	ID	Input_number	Background_number	Rich_factor	P_Value	FDR	Input	Hyperlink
Osteoclast differentiation	KEGG PATHWAY	ko04380	8	99	2.911740354	0.006180065	0.00258149	K04696:SOCS3,SOCS3|K08091:GAB2|K04348:PPP3CC|K04379:de030ec8-9db7-4ab2-8ce8-ee97b86a294b,de030ec8-9db7-4ab2-8ce8-ee97b86a294b|K08012:NCF4|K08008:NOX1|K04371:MAPK1,MAPK1|K08530:PPARG	https://www.kegg.jp/kegg-bin/show_pathway?ko04380/K04696%09red/K08091%09red/K04348%09red/K04379%09red/K08012%09red/K08008%09red/K04371%09red/K08530%09red/
MAPK signaling pathway	KEGG PATHWAY	ko04010	13	191	2.452493348	0.002575045	0.007814294	K04865:CACNB4|K04468:NLK|K04866:CACNG1|K04432:MAP2K3|K18018:PTPN5,PTPN5|K04462:767786dd-129f-4ad6-a090-734e5a0fbdbc,767786dd-129f-4ad6-a090-734e5a0fbdbc|K04348:PPP3CC|K04439:ARRB1|K04379:de030ec8-9db7-4ab2-8ce8-ee97b86a294b,de030ec8-9db7-4ab2-8ce8-ee97b86a294b|K16342:LOC101794571|K04426:MAP3K5,MAP3K5|K04350:RASGRP1,RASGRP1|K04371:MAPK1,MAPK1	https://www.kegg.jp/kegg-bin/show_pathway?ko04010/K04865%09red/K04468%09red/K04866%09red/K04432%09red/K18018%09red/K04462%09red/K04348%09red/K04439%09red/K04379%09red/K16342%09red/K04426%09red/K04350%09red/K04371%09red/
Vitamin digestion and absorption	KEGG PATHWAY	ko04977	3	21	5.147540984	0.01943867	0.013478711	K14592:LOC101790444|K14618:MMACHC|K14617:LMBRD1	https://www.kegg.jp/kegg-bin/show_pathway?ko04977/K14592%09red/K14618%09red/K14617%09red/
Antigen processing and presentation	KEGG PATHWAY	ko04612	4	41	3.515393842	0.026312147	0.022995022	K06752:LOC113841477,LOC113841477|K08065:NFYB|K06454:CD4,CD4|K01363:CTSB	https://www.kegg.jp/kegg-bin/show_pathway?ko04612/K06752%09red/K08065%09red/K06454%09red/K01363%09red/
Olfactory transduction	KEGG PATHWAY	ko04740	3	25	4.323934426	0.030999249	0.022995022	K12321:LOC101805092|K04439:ARRB1|K04952:CNGB1	https://www.kegg.jp/kegg-bin/show_pathway?ko04740/K12321%09red/K04439%09red/K04952%09red/
TNF signaling pathway	KEGG PATHWAY	ko04668	10	87	4.141699642	0.000141241	0.029664515	K04696:SOCS3,SOCS3|K08849:MLKL|K04426:MAP3K5,MAP3K5|K04432:MAP2K3|K16366:EDN1|K04379:de030ec8-9db7-4ab2-8ce8-ee97b86a294b,de030ec8-9db7-4ab2-8ce8-ee97b86a294b|K17065:DNM1L|K11987:PTGS2|K05405:IL6|K04371:MAPK1,MAPK1	https://www.kegg.jp/kegg-bin/show_pathway?ko04668/K04696%09red/K08849%09red/K04426%09red/K04432%09red/K16366%09red/K04379%09red/K17065%09red/K11987%09red/K05405%09red/K04371%09red/
Serotonergic synapse	KEGG PATHWAY	ko04726	11	84	4.718579235	1.92E-05	0.038335352	K08045:d1616eca-0643-4ca3-8247-dfefe77a7c6d|K16342:LOC101794571|K04999:KCNJ5,KCNJ5|K05037:SLC6A4,SLC6A4|K11987:PTGS2|K04371:MAPK1,MAPK1|K00509:PTGS1|K04630:LOC101797591|K04161:HTR5A|K04162:HTR6|K04153:8b9f8035-cdf5-4101-9385-b212088d7501,8b9f8035-cdf5-4101-9385-b212088d7501	https://www.kegg.jp/kegg-bin/show_pathway?ko04726/K08045%09red/K16342%09red/K04999%09red/K05037%09red/K11987%09red/K04371%09red/K00509%09red/K04630%09red/K04161%09red/K04162%09red/K04153%09red/
Regulation of lipolysis in adipocytes	KEGG PATHWAY	ko04923	7	45	5.605100182	0.000217064	0.039570614	K08768:PLIN1,PLIN1|K08045:d1616eca-0643-4ca3-8247-dfefe77a7c6d|K08041:ADCY1|K11987:PTGS2|K00509:PTGS1|K04630:LOC101797591|K16816:PNPLA2	https://www.kegg.jp/kegg-bin/show_pathway?ko04923/K08768%09red/K08045%09red/K08041%09red/K11987%09red/K00509%09red/K04630%09red/K16816%09red/
Ovarian steroidogenesis	KEGG PATHWAY	ko04913	4	39	3.69567045	0.022305647	0.048279981	K16342:LOC101794571|K08041:ADCY1|K11987:PTGS2|K08045:d1616eca-0643-4ca3-8247-dfefe77a7c6d	https://www.kegg.jp/kegg-bin/show_pathway?ko04913/K16342%09red/K08041%09red/K11987%09red/K08045%09red/
Oxytocin signaling pathway	KEGG PATHWAY	ko04921	15	111	4.869295525	3.90E-07	0.051816003	K04865:CACNB4|K08041:ADCY1|K04866:CACNG1|K07200:PRKAG3|K16342:LOC101794571|K08045:d1616eca-0643-4ca3-8247-dfefe77a7c6d|K00907:MYLK2|K04999:KCNJ5,KCNJ5|K04229:OXTR|K04348:PPP3CC|K04379:de030ec8-9db7-4ab2-8ce8-ee97b86a294b,de030ec8-9db7-4ab2-8ce8-ee97b86a294b|K04371:MAPK1,MAPK1|K11987:PTGS2|K08292:6cb7ed6c-ee09-41be-b3e3-e5ad552b941a|K04630:LOC101797591	https://www.kegg.jp/kegg-bin/show_pathway?ko04921/K04865%09red/K08041%09red/K04866%09red/K07200%09red/K16342%09red/K08045%09red/K00907%09red/K04999%09red/K04229%09red/K04348%09red/K04379%09red/K04371%09red/K11987%09red/K08292%09red/K04630%09red/
Parkinson's disease	KEGG PATHWAY	ko05012	9	122	2.65815641	0.006836834	0.066933974	K03948:NDUFA4L2|K08045:d1616eca-0643-4ca3-8247-dfefe77a7c6d|K10578:UBE2J1|K03946:NDUFA2|K04556:PRKN|K02138:ATP5PD|K00237:SDHD|K04630:LOC101797591|K02267:LOC113840545	https://www.kegg.jp/kegg-bin/show_pathway?ko05012/K03948%09red/K08045%09red/K10578%09red/K03946%09red/K04556%09red/K02138%09red/K00237%09red/K04630%09red/K02267%09red/
Various types of N-glycan biosynthesis	KEGG PATHWAY	ko00513	4	49	2.941451991	0.046427268	0.082668187	K12670:DDOST|K03846:ALG9|K00738:MGAT4A,MGAT4A|K07968:B4GALT3	https://www.kegg.jp/kegg-bin/show_pathway?ko00513/K12670%09red/K03846%09red/K00738%09red/K07968%09red/
Adrenergic signaling in cardiomyocytes	KEGG PATHWAY	ko04261	7	92	2.741625089	0.013896726	0.09082297	K04865:CACNB4|K08041:ADCY1|K04866:CACNG1|K08045:d1616eca-0643-4ca3-8247-dfefe77a7c6d|K04848:SCN4B|K04371:MAPK1,MAPK1|K04630:LOC101797591	https://www.kegg.jp/kegg-bin/show_pathway?ko04261/K04865%09red/K08041%09red/K04866%09red/K08045%09red/K04848%09red/K04371%09red/K04630%09red/
Gastric acid secretion	KEGG PATHWAY	ko04971	5	49	3.676814988	0.011196871	0.094887068	K04630:LOC101797591|K00907:MYLK2|K08041:ADCY1|K04150:LOC101802707|K08045:d1616eca-0643-4ca3-8247-dfefe77a7c6d	https://www.kegg.jp/kegg-bin/show_pathway?ko04971/K04630%09red/K00907%09red/K08041%09red/K04150%09red/K08045%09red/
Chagas disease (American trypanosomiasis)	KEGG PATHWAY	ko05142	7	82	3.075969612	0.007611972	0.096369687	K08041:ADCY1|K04729:MYD88,MYD88|K05842:TICAM1,TICAM1,TICAM1,TICAM1|K04379:de030ec8-9db7-4ab2-8ce8-ee97b86a294b,de030ec8-9db7-4ab2-8ce8-ee97b86a294b|K04371:MAPK1,MAPK1|K05405:IL6|K04630:LOC101797591	https://www.kegg.jp/kegg-bin/show_pathway?ko05142/K08041%09red/K04729%09red/K05842%09red/K04379%09red/K04371%09red/K05405%09red/K04630%09red/
Retrograde endocannabinoid signaling	KEGG PATHWAY	ko04723	7	74	3.408506868	0.0043445	0.098831176	K08041:ADCY1|K05190:LOC101798492|K08045:d1616eca-0643-4ca3-8247-dfefe77a7c6d|K04999:KCNJ5,KCNJ5|K04371:MAPK1,MAPK1|K11987:PTGS2|K04630:LOC101797591	https://www.kegg.jp/kegg-bin/show_pathway?ko04723/K08041%09red/K05190%09red/K08045%09red/K04999%09red/K04371%09red/K11987%09red/K04630%09red/
Longevity regulating pathway	KEGG PATHWAY	ko04211	8	68	4.239151398	0.000558248	0.109553432	K07208:RHEB|K08041:ADCY1|K08045:d1616eca-0643-4ca3-8247-dfefe77a7c6d|K07200:PRKAG3|K03259:EIF4E|K07297:ADIPOR2|K07296:ADIPOQ|K08530:PPARG	https://www.kegg.jp/kegg-bin/show_pathway?ko04211/K07208%09red/K08041%09red/K08045%09red/K07200%09red/K03259%09red/K07297%09red/K07296%09red/K08530%09red/
Apoptosis - fly	KEGG PATHWAY	ko04214	5	56	3.217213115	0.019189152	0.109824614	K04371:MAPK1,MAPK1|K17065:DNM1L|K10798:PARP4|K04426:MAP3K5,MAP3K5|K06030:MFN2	https://www.kegg.jp/kegg-bin/show_pathway?ko04214/K04371%09red/K17065%09red/K10798%09red/K04426%09red/K06030%09red/
Vascular smooth muscle contraction	KEGG PATHWAY	ko04270	9	96	3.37807377	0.001356292	0.11787387	K08447:RAMP1|K08041:ADCY1|K08045:d1616eca-0643-4ca3-8247-dfefe77a7c6d|K16342:LOC101794571|K16366:EDN1|K18051:PRKCH|K00907:MYLK2|K12337:MRVI1|K04371:MAPK1,MAPK1	https://www.kegg.jp/kegg-bin/show_pathway?ko04270/K08447%09red/K08041%09red/K08045%09red/K16342%09red/K16366%09red/K18051%09red/K00907%09red/K12337%09red/K04371%09red/
HIF-1 signaling pathway	KEGG PATHWAY	ko04066	6	71	3.045024244	0.013760707	0.132851677	K00162:PDHB|K16366:EDN1|K05405:IL6|K03259:EIF4E|K08008:NOX1|K04371:MAPK1,MAPK1	https://www.kegg.jp/kegg-bin/show_pathway?ko04066/K00162%09red/K16366%09red/K05405%09red/K03259%09red/K08008%09red/K04371%09red/
Ether lipid metabolism	KEGG PATHWAY	ko00565	4	29	4.97003957	0.007989856	0.161097025	K01062:PLA2G7,PLA2G7|K16342:LOC101794571|K00993:SELENOI|K04628:UGT8	https://www.kegg.jp/kegg-bin/show_pathway?ko00565/K01062%09red/K16342%09red/K00993%09red/K04628%09red/
AGE-RAGE signaling pathway in diabetic complications	KEGG PATHWAY	ko04933	7	72	3.503187614	0.003727048	0.177773351	K05449:VEGFC,VEGFC,VEGFC,VEGFC|K16366:EDN1|K05857:PLCD4|K05405:IL6|K08008:NOX1|K04371:MAPK1,MAPK1|K06236:COL1A2	https://www.kegg.jp/kegg-bin/show_pathway?ko04933/K05449%09red/K16366%09red/K05857%09red/K05405%09red/K08008%09red/K04371%09red/K06236%09red/
Influenza A	KEGG PATHWAY	ko05164	8	124	2.324695928	0.022053325	0.195460658	K04696:SOCS3,SOCS3|K06752:LOC113841477,LOC113841477|K04432:MAP2K3|K05842:TICAM1,TICAM1,TICAM1,TICAM1|K04729:MYD88,MYD88|K05405:IL6|K04371:MAPK1,MAPK1|K14290:XPO1	https://www.kegg.jp/kegg-bin/show_pathway?ko05164/K04696%09red/K06752%09red/K04432%09red/K05842%09red/K04729%09red/K05405%09red/K04371%09red/K14290%09red/
Toll-like receptor signaling pathway	KEGG PATHWAY	ko04620	7	76	3.318809318	0.005036331	0.196052078	K04729:MYD88,MYD88|K04432:MAP2K3|K05842:TICAM1,TICAM1,TICAM1,TICAM1|K04379:de030ec8-9db7-4ab2-8ce8-ee97b86a294b,de030ec8-9db7-4ab2-8ce8-ee97b86a294b|K05403:TIRAP|K05405:IL6|K04371:MAPK1,MAPK1	https://www.kegg.jp/kegg-bin/show_pathway?ko04620/K04729%09red/K04432%09red/K05842%09red/K04379%09red/K05403%09red/K05405%09red/K04371%09red/
Arachidonic acid metabolism	KEGG PATHWAY	ko00590	5	45	4.003642987	0.007845916	0.196698691	K00432:GPX3|K15729:PTGES|K11987:PTGS2|K00509:PTGS1|K16342:LOC101794571	https://www.kegg.jp/kegg-bin/show_pathway?ko00590/K00432%09red/K15729%09red/K11987%09red/K00509%09red/K16342%09red/
Long-term depression	KEGG PATHWAY	ko04730	4	45	3.20291439	0.035544515	0.197510118	K04630:LOC101797591|K04371:MAPK1,MAPK1|K16342:LOC101794571|K05256:CRH	https://www.kegg.jp/kegg-bin/show_pathway?ko04730/K04630%09red/K04371%09red/K16342%09red/K05256%09red/
Phototransduction	KEGG PATHWAY	ko04744	3	18	6.005464481	0.01267763	0.214329105	K12321:LOC101805092|K13756:PDE6B|K04952:CNGB1	https://www.kegg.jp/kegg-bin/show_pathway?ko04744/K12321%09red/K13756%09red/K04952%09red/
Non-alcoholic fatty liver disease (NAFLD)	KEGG PATHWAY	ko04932	10	124	2.90586991	0.002342178	0.219751435	K04696:SOCS3,SOCS3|K03948:NDUFA4L2|K07200:PRKAG3|K03946:NDUFA2|K04426:MAP3K5,MAP3K5|K05405:IL6|K00237:SDHD|K07297:ADIPOR2|K07296:ADIPOQ|K02267:LOC113840545	https://www.kegg.jp/kegg-bin/show_pathway?ko04932/K04696%09red/K03948%09red/K07200%09red/K03946%09red/K04426%09red/K05405%09red/K00237%09red/K07297%09red/K07296%09red/K02267%09red/
Sphingolipid metabolism	KEGG PATHWAY	ko00600	4	41	3.515393842	0.026312147	0.219751435	K12352:SMPD3,SMPD3|K04628:UGT8|K17108:GBA2|K07553:B4GALT6	https://www.kegg.jp/kegg-bin/show_pathway?ko00600/K12352%09red/K04628%09red/K17108%09red/K07553%09red/
HTLV-I infection	KEGG PATHWAY	ko05166	11	206	1.924080853	0.028684867	0.219751435	K08041:ADCY1|K06752:LOC113841477,LOC113841477|K08045:d1616eca-0643-4ca3-8247-dfefe77a7c6d|K04348:PPP3CC|K04379:de030ec8-9db7-4ab2-8ce8-ee97b86a294b,de030ec8-9db7-4ab2-8ce8-ee97b86a294b|K09421:MYBL1|K05405:IL6|K06635:PTTG1|K08065:NFYB|K06620:E2F3,E2F3|K14290:XPO1	https://www.kegg.jp/kegg-bin/show_pathway?ko05166/K08041%09red/K06752%09red/K08045%09red/K04348%09red/K04379%09red/K09421%09red/K05405%09red/K06635%09red/K08065%09red/K06620%09red/K14290%09red/
VEGF signaling pathway	KEGG PATHWAY	ko04370	4	39	3.69567045	0.022305647	0.232100385	K04371:MAPK1,MAPK1|K16342:LOC101794571|K11987:PTGS2|K04348:PPP3CC	https://www.kegg.jp/kegg-bin/show_pathway?ko04370/K04371%09red/K16342%09red/K11987%09red/K04348%09red/
cGMP-PKG signaling pathway	KEGG PATHWAY	ko04022	10	117	3.079725375	0.001517033	0.250274272	K04198:EDNRB|K08041:ADCY1|K08045:d1616eca-0643-4ca3-8247-dfefe77a7c6d|K04371:MAPK1,MAPK1|K04969:TRPC6|K04952:CNGB1|K04348:PPP3CC|K00907:MYLK2|K12337:MRVI1|K04630:LOC101797591	https://www.kegg.jp/kegg-bin/show_pathway?ko04022/K04198%09red/K08041%09red/K08045%09red/K04371%09red/K04969%09red/K04952%09red/K04348%09red/K00907%09red/K12337%09red/K04630%09red/
N-Glycan biosynthesis	KEGG PATHWAY	ko00510	5	43	4.18985894	0.006465323	0.250274272	K03850:LOC101802648|K12670:DDOST|K03846:ALG9|K00738:MGAT4A,MGAT4A|K07968:B4GALT3	https://www.kegg.jp/kegg-bin/show_pathway?ko00510/K03850%09red/K12670%09red/K03846%09red/K00738%09red/K07968%09red/
Choline metabolism in cancer	KEGG PATHWAY	ko05231	7	61	4.13490997	0.001429537	0.258819659	K07208:RHEB|K15377:SLC44A5|K06515:SLC44A1|K04379:de030ec8-9db7-4ab2-8ce8-ee97b86a294b,de030ec8-9db7-4ab2-8ce8-ee97b86a294b|K16342:LOC101794571|K14156:CHKA|K04371:MAPK1,MAPK1	https://www.kegg.jp/kegg-bin/show_pathway?ko05231/K07208%09red/K15377%09red/K06515%09red/K04379%09red/K16342%09red/K14156%09red/K04371%09red/
PPAR signaling pathway	KEGG PATHWAY	ko03320	8	61	4.725611395	0.000263016	0.259505335	K08768:PLIN1,PLIN1|K00507:SCD5|K08752:FABP3|K06259:CD36|K07296:ADIPOQ|K08530:PPARG|K00864:GK|K00255:ACADL	https://www.kegg.jp/kegg-bin/show_pathway?ko03320/K08768%09red/K00507%09red/K08752%09red/K06259%09red/K07296%09red/K08530%09red/K00864%09red/K00255%09red/
Chemical carcinogenesis	KEGG PATHWAY	ko05204	5	36	5.004553734	0.002964217	0.259505335	K00129:LOC101796911|K00699:LOC101796668,LOC101796668|K01253:EPHX1|K00816:KYAT1|K11987:PTGS2	https://www.kegg.jp/kegg-bin/show_pathway?ko05204/K00129%09red/K00699%09red/K01253%09red/K00816%09red/K11987%09red/
Tuberculosis	KEGG PATHWAY	ko05152	9	131	2.475534977	0.010690843	0.259505335	K06752:LOC113841477,LOC113841477|K04729:MYD88,MYD88|K03662:ATP6AP1|K04348:PPP3CC|K05403:TIRAP|K05405:IL6|K04371:MAPK1,MAPK1|K08065:NFYB|K06560:LOC101801378,LOC101800998	https://www.kegg.jp/kegg-bin/show_pathway?ko05152/K06752%09red/K04729%09red/K03662%09red/K04348%09red/K05403%09red/K05405%09red/K04371%09red/K08065%09red/K06560%09red/
Endocytosis	KEGG PATHWAY	ko04144	10	177	2.035750671	0.0257704	0.278298008	K17918:SNX3|K04189:CXCR4|K18442:ARFGEF1,ARFGEF1|K18466:VPS26A|K05084:ERBB3|K04439:ARRB1|K17920:SNX6|K07891:RAB22A|K06093:LOC101794093,LOC101794093|K12495:LOC113845046	https://www.kegg.jp/kegg-bin/show_pathway?ko04144/K17918%09red/K04189%09red/K18442%09red/K18466%09red/K05084%09red/K04439%09red/K17920%09red/K07891%09red/K06093%09red/K12495%09red/
Tight junction	KEGG PATHWAY	ko04530	8	77	3.74366617	0.001281511	0.314907504	K03097:CSNK2A2|K06103:LOC113841779,LOC113841779|K06107:EPB41L3|K18051:PRKCH|K04630:LOC101797591|K06093:LOC101794093,LOC101794093|K18625:98f3fe9b-f396-4f83-bc6c-cc2aa9cf0d7f,98f3fe9b-f396-4f83-bc6c-cc2aa9cf0d7f|K06087:LOC101799421	https://www.kegg.jp/kegg-bin/show_pathway?ko04530/K03097%09red/K06103%09red/K06107%09red/K18051%09red/K04630%09red/K06093%09red/K18625%09red/K06087%09red/
Apoptosis	KEGG PATHWAY	ko04210	9	109	2.975184238	0.003262715	0.314907504	K04738:LOC101793887,LOC101793887|K04426:MAP3K5,MAP3K5|K10798:PARP4|K01363:CTSB|K04379:de030ec8-9db7-4ab2-8ce8-ee97b86a294b,de030ec8-9db7-4ab2-8ce8-ee97b86a294b|K04396:CASP6|K02311:DFFB|K04371:MAPK1,MAPK1|K16943:SEPT4	https://www.kegg.jp/kegg-bin/show_pathway?ko04210/K04738%09red/K04426%09red/K10798%09red/K01363%09red/K04379%09red/K04396%09red/K02311%09red/K04371%09red/K16943%09red/
Toxoplasmosis	KEGG PATHWAY	ko05145	7	94	2.68329264	0.015500285	0.320604114	K06752:LOC113841477,LOC113841477|K04432:MAP2K3|K06485:ITGA6|K05637:LAMA2,LAMA2|K04371:MAPK1,MAPK1|K04729:MYD88,MYD88|K04630:LOC101797591	https://www.kegg.jp/kegg-bin/show_pathway?ko05145/K06752%09red/K04432%09red/K06485%09red/K05637%09red/K04371%09red/K04729%09red/K04630%09red/
Central carbon metabolism in cancer	KEGG PATHWAY	ko05230	4	46	3.133285816	0.03810993	0.343408658	K04371:MAPK1,MAPK1|K05101:NTRK3,NTRK3,NTRK3|K00162:PDHB|K01425:GLS,GLS	https://www.kegg.jp/kegg-bin/show_pathway?ko05230/K04371%09red/K05101%09red/K00162%09red/K01425%09red/
GABAergic synapse	KEGG PATHWAY	ko04727	6	65	3.326103405	0.009103955	0.381956345	K08041:ADCY1|K05190:LOC101798492|K08045:d1616eca-0643-4ca3-8247-dfefe77a7c6d|K04630:LOC101797591|K13576:SLC38A3,SLC38A3|K01425:GLS,GLS	https://www.kegg.jp/kegg-bin/show_pathway?ko04727/K08041%09red/K05190%09red/K08045%09red/K04630%09red/K13576%09red/K01425%09red/
Complement and coagulation cascades	KEGG PATHWAY	ko04610	6	78	2.771752837	0.021040272	0.387924089	K04009:C3AR1,C3AR1|K03902:F5,F5|K04236:F2RL3|K03909:TFPI|K03912:SERPIND1|K03915:BDKRB1	https://www.kegg.jp/kegg-bin/show_pathway?ko04610/K04009%09red/K03902%09red/K04236%09red/K03909%09red/K03912%09red/K03915%09red/
Cholinergic synapse	KEGG PATHWAY	ko04725	6	88	2.456780924	0.035391612	0.389261971	K08041:ADCY1|K08045:d1616eca-0643-4ca3-8247-dfefe77a7c6d|K04379:de030ec8-9db7-4ab2-8ce8-ee97b86a294b,de030ec8-9db7-4ab2-8ce8-ee97b86a294b|K04371:MAPK1,MAPK1|K04927:KCNQ2|K04630:LOC101797591	https://www.kegg.jp/kegg-bin/show_pathway?ko04725/K08041%09red/K08045%09red/K04379%09red/K04371%09red/K04927%09red/K04630%09red/
Axon guidance	KEGG PATHWAY	ko04360	8	121	2.382333017	0.019337323	0.404480193	K04189:CXCR4|K06755:LOC101801269|K04969:TRPC6|K04348:PPP3CC|K04371:MAPK1,MAPK1|K04630:LOC101797591|K06093:LOC101794093,LOC101794093|K07521:UNC5D,UNC5D	https://www.kegg.jp/kegg-bin/show_pathway?ko04360/K04189%09red/K06755%09red/K04969%09red/K04348%09red/K04371%09red/K04630%09red/K06093%09red/K07521%09red/
AMPK signaling pathway	KEGG PATHWAY	ko04152	9	82	3.954818073	0.000429794	0.457178964	K07208:RHEB|K07200:PRKAG3|K08292:6cb7ed6c-ee09-41be-b3e3-e5ad552b941a|K06259:CD36|K07297:ADIPOR2|K07296:ADIPOQ|K08530:PPARG|K00507:SCD5|K08272:CAB39L	https://www.kegg.jp/kegg-bin/show_pathway?ko04152/K07208%09red/K07200%09red/K08292%09red/K06259%09red/K07297%09red/K07296%09red/K08530%09red/K00507%09red/K08272%09red/
Circadian entrainment	KEGG PATHWAY	ko04713	7	76	3.318809318	0.005036331	0.457178964	K08041:ADCY1|K08045:d1616eca-0643-4ca3-8247-dfefe77a7c6d|K04999:KCNJ5,KCNJ5|K04379:de030ec8-9db7-4ab2-8ce8-ee97b86a294b,de030ec8-9db7-4ab2-8ce8-ee97b86a294b|K04371:MAPK1,MAPK1|K04630:LOC101797591|K11265:LOC106020683	https://www.kegg.jp/kegg-bin/show_pathway?ko04713/K08041%09red/K08045%09red/K04999%09red/K04379%09red/K04371%09red/K04630%09red/K11265%09red/
Hepatitis B	KEGG PATHWAY	ko05161	8	113	2.550993762	0.013272828	0.47822165	K04729:MYD88,MYD88|K03662:ATP6AP1|K05842:TICAM1,TICAM1,TICAM1,TICAM1|K04379:de030ec8-9db7-4ab2-8ce8-ee97b86a294b,de030ec8-9db7-4ab2-8ce8-ee97b86a294b|K05403:TIRAP|K05405:IL6|K04371:MAPK1,MAPK1|K06620:E2F3,E2F3	https://www.kegg.jp/kegg-bin/show_pathway?ko05161/K04729%09red/K03662%09red/K05842%09red/K04379%09red/K05403%09red/K05405%09red/K04371%09red/K06620%09red/
Platelet activation	KEGG PATHWAY	ko04611	11	87	4.555869606	2.69E-05	0.493922509	K04236:F2RL3|K04350:RASGRP1,RASGRP1|K16342:LOC101794571|K08045:d1616eca-0643-4ca3-8247-dfefe77a7c6d|K00907:MYLK2|K08041:ADCY1|K04371:MAPK1,MAPK1|K00509:PTGS1|K06262:GP1BB|K04630:LOC101797591|K06236:COL1A2	https://www.kegg.jp/kegg-bin/show_pathway?ko04611/K04236%09red/K04350%09red/K16342%09red/K08045%09red/K00907%09red/K08041%09red/K04371%09red/K00509%09red/K06262%09red/K04630%09red/K06236%09red/
Drug metabolism - other enzymes	KEGG PATHWAY	ko00983	3	22	4.913561848	0.022055541	0.494745541	K00699:LOC101796668,LOC101796668|K00857:TK1|K00088:IMPDH2	https://www.kegg.jp/kegg-bin/show_pathway?ko00983/K00699%09red/K00857%09red/K00088%09red/
RNA transport	KEGG PATHWAY	ko03013	8	138	2.088857211	0.038324182	0.515695856	K18644:EIF4EBP2,EIF4EBP2|K12880:THOC3|K14302:NUP37|K03259:EIF4E|K03247:EIF3H|K14296:LOC113842200|K14004:LOC113841666|K14290:XPO1	https://www.kegg.jp/kegg-bin/show_pathway?ko03013/K18644%09red/K12880%09red/K14302%09red/K03259%09red/K03247%09red/K14296%09red/K14004%09red/K14290%09red/
Phagosome	KEGG PATHWAY	ko04145	9	95	3.413632442	0.001259112	0.54965262	K06752:LOC113841477,LOC113841477|K08492:STX18|K03662:ATP6AP1|K08012:NCF4|K10067:SFTPA|K13883:RILP|K08008:NOX1|K06259:CD36|K06560:LOC101801378,LOC101800998	https://www.kegg.jp/kegg-bin/show_pathway?ko04145/K06752%09red/K08492%09red/K03662%09red/K08012%09red/K10067%09red/K13883%09red/K08008%09red/K06259%09red/K06560%09red/
Amphetamine addiction	KEGG PATHWAY	ko05031	4	45	3.20291439	0.035544515	0.606592364	K04379:de030ec8-9db7-4ab2-8ce8-ee97b86a294b,de030ec8-9db7-4ab2-8ce8-ee97b86a294b|K04348:PPP3CC|K15840:41c1c4a7-0f97-42e5-b29a-adf16435d935,41c1c4a7-0f97-42e5-b29a-adf16435d935|K08045:d1616eca-0643-4ca3-8247-dfefe77a7c6d	https://www.kegg.jp/kegg-bin/show_pathway?ko05031/K04379%09red/K04348%09red/K15840%09red/K08045%09red/
Rap1 signaling pathway	KEGG PATHWAY	ko04015	10	156	2.309794031	0.011625204	0.618303629	K04236:F2RL3|K04432:MAP2K3|K08045:d1616eca-0643-4ca3-8247-dfefe77a7c6d|K05449:VEGFC,VEGFC,VEGFC,VEGFC|K08041:ADCY1|K17699:SKAP1,SKAP1,SKAP1|K04371:MAPK1,MAPK1|K04294:LPAR3,LPAR3,LPAR3|K04630:LOC101797591|K06093:LOC101794093,LOC101794093	https://www.kegg.jp/kegg-bin/show_pathway?ko04015/K04236%09red/K04432%09red/K08045%09red/K05449%09red/K08041%09red/K17699%09red/K04371%09red/K04294%09red/K04630%09red/K06093%09red/
cAMP signaling pathway	KEGG PATHWAY	ko04024	10	146	2.467999102	0.007466814	0.633131011	K08041:ADCY1|K08045:d1616eca-0643-4ca3-8247-dfefe77a7c6d|K04952:CNGB1|K04229:OXTR|K04379:de030ec8-9db7-4ab2-8ce8-ee97b86a294b,de030ec8-9db7-4ab2-8ce8-ee97b86a294b|K04371:MAPK1,MAPK1|K04630:LOC101797591|K04162:HTR6|K11265:LOC106020683|K04153:8b9f8035-cdf5-4101-9385-b212088d7501,8b9f8035-cdf5-4101-9385-b212088d7501	https://www.kegg.jp/kegg-bin/show_pathway?ko04024/K08041%09red/K08045%09red/K04952%09red/K04229%09red/K04379%09red/K04371%09red/K04630%09red/K04162%09red/K11265%09red/K04153%09red/
ECM-receptor interaction	KEGG PATHWAY	ko04512	5	60	3.00273224	0.025105995	0.633131011	K06485:ITGA6|K06259:CD36|K06236:COL1A2|K05637:LAMA2,LAMA2|K06262:GP1BB	https://www.kegg.jp/kegg-bin/show_pathway?ko04512/K06485%09red/K06259%09red/K06236%09red/K05637%09red/K06262%09red/
Leishmaniasis	KEGG PATHWAY	ko05140	6	57	3.792924935	0.004806654	0.637558917	K06752:LOC113841477,LOC113841477|K04379:de030ec8-9db7-4ab2-8ce8-ee97b86a294b,de030ec8-9db7-4ab2-8ce8-ee97b86a294b|K11987:PTGS2|K08012:NCF4|K04729:MYD88,MYD88|K04371:MAPK1,MAPK1	https://www.kegg.jp/kegg-bin/show_pathway?ko05140/K06752%09red/K04379%09red/K11987%09red/K08012%09red/K04729%09red/K04371%09red/
Calcium signaling pathway	KEGG PATHWAY	ko04020	13	141	3.32217184	0.000146819	0.652324006	K05221:P2RX6|K08041:ADCY1|K04198:EDNRB|K05084:ERBB3|K04229:OXTR|K04348:PPP3CC|K03915:BDKRB1|K05857:PLCD4|K00907:MYLK2|K04161:HTR5A|K04162:HTR6|K07190:PHKB|K04150:LOC101802707	https://www.kegg.jp/kegg-bin/show_pathway?ko04020/K05221%09red/K08041%09red/K04198%09red/K05084%09red/K04229%09red/K04348%09red/K03915%09red/K05857%09red/K00907%09red/K04161%09red/K04162%09red/K07190%09red/K04150%09red/
Leukocyte transendothelial migration	KEGG PATHWAY	ko04670	6	75	2.882622951	0.017660022	0.652324006	K04189:CXCR4|K06471:PECAM1|K08012:NCF4|K08008:NOX1|K04630:LOC101797591|K06087:LOC101799421	https://www.kegg.jp/kegg-bin/show_pathway?ko04670/K04189%09red/K06471%09red/K08012%09red/K08008%09red/K04630%09red/K06087%09red/
Bile secretion	KEGG PATHWAY	ko04976	6	59	3.664351209	0.00569972	0.655654392	K08041:ADCY1|K08045:d1616eca-0643-4ca3-8247-dfefe77a7c6d|K05681:ABCG2|K14341:SLC10A1|K01253:EPHX1|K05658:LOC113842648	https://www.kegg.jp/kegg-bin/show_pathway?ko04976/K08041%09red/K08045%09red/K05681%09red/K14341%09red/K01253%09red/K05658%09red/
GnRH signaling pathway	KEGG PATHWAY	ko04912	5	63	2.859744991	0.030235729	0.655654392	K04371:MAPK1,MAPK1|K16342:LOC101794571|K08041:ADCY1|K04432:MAP2K3|K08045:d1616eca-0643-4ca3-8247-dfefe77a7c6d	https://www.kegg.jp/kegg-bin/show_pathway?ko04912/K04371%09red/K16342%09red/K08041%09red/K04432%09red/K08045%09red/
Insulin signaling pathway	KEGG PATHWAY	ko04910	9	86	3.770873046	0.000612284	0.665962589	K04696:SOCS3,SOCS3|K07208:RHEB|K07200:PRKAG3|K07194:RHOQ,RHOQ|K03259:EIF4E|K04371:MAPK1,MAPK1|K07190:PHKB|K04739:PRKAR2B|K07193:SH2B2	https://www.kegg.jp/kegg-bin/show_pathway?ko04910/K04696%09red/K07208%09red/K07200%09red/K07194%09red/K03259%09red/K04371%09red/K07190%09red/K04739%09red/K07193%09red/
Cell adhesion molecules (CAMs)	KEGG PATHWAY	ko04514	8	99	2.911740354	0.006180065	0.665962589	K06752:LOC113841477,LOC113841477|K06471:PECAM1|K06756:NRCAM|K06485:ITGA6|K06760:CNTN2|K06454:CD4,CD4|K06708:PDCD1LG2|K06087:LOC101799421	https://www.kegg.jp/kegg-bin/show_pathway?ko04514/K06752%09red/K06471%09red/K06756%09red/K06485%09red/K06760%09red/K06454%09red/K06708%09red/K06087%09red/
Estrogen signaling pathway	KEGG PATHWAY	ko04915	7	65	3.880453972	0.002076181	0.675661276	K08041:ADCY1|K08045:d1616eca-0643-4ca3-8247-dfefe77a7c6d|K04999:KCNJ5,KCNJ5|K04379:de030ec8-9db7-4ab2-8ce8-ee97b86a294b,de030ec8-9db7-4ab2-8ce8-ee97b86a294b|K04371:MAPK1,MAPK1|K04630:LOC101797591|K04215:OPRM1	https://www.kegg.jp/kegg-bin/show_pathway?ko04915/K08041%09red/K08045%09red/K04999%09red/K04379%09red/K04371%09red/K04630%09red/K04215%09red/
Neuroactive ligand-receptor interaction	KEGG PATHWAY	ko04080	20	279	2.582995476	9.92E-05	0.681375188	K05206:LOC113843933,LOC101800190|K04198:EDNRB|K04236:F2RL3|K04231:GALR2|K05190:LOC101798492|K05221:P2RX6|K04229:OXTR|K05204:GRIK4,GRIK4|K08386:P2RY8,P2RY8,P2RY8|K03915:BDKRB1|K04803:CHRNA1|K04009:C3AR1,C3AR1|K04240:NPFFR1|K04294:LPAR3,LPAR3,LPAR3|K04203:MC5R,MC5R|K04161:HTR5A|K04162:HTR6|K04150:LOC101802707|K04153:8b9f8035-cdf5-4101-9385-b212088d7501,8b9f8035-cdf5-4101-9385-b212088d7501|K04215:OP…	https://www.kegg.jp/kegg-bin/show_pathway?ko04080/K05206%09red/K04198%09red/K04236%09red/K04231%09red/K05190%09red/K05221%09red/K04229%09red/K05204%09red/K08386%09red/K03915%09red/K04803%09red/K04009%09red/K04240%09red/K04294%09red/K04203%09red/K04161%09red/K04162%09red/K04150%09red/K04153%09red/K04215%09red/
Hypertrophic cardiomyopathy (HCM)	KEGG PATHWAY	ko05410	6	75	2.882622951	0.017660022	0.681375188	K04865:CACNB4|K04866:CACNG1|K06485:ITGA6|K16366:EDN1|K07200:PRKAG3|K05405:IL6	https://www.kegg.jp/kegg-bin/show_pathway?ko05410/K04865%09red/K04866%09red/K06485%09red/K16366%09red/K07200%09red/K05405%09red/
Fc epsilon RI signaling pathway	KEGG PATHWAY	ko04664	4	45	3.20291439	0.035544515	0.681375188	K04371:MAPK1,MAPK1|K08091:GAB2|K04432:MAP2K3|K16342:LOC101794571	https://www.kegg.jp/kegg-bin/show_pathway?ko04664/K04371%09red/K08091%09red/K04432%09red/K16342%09red/
Glutamatergic synapse	KEGG PATHWAY	ko04724	9	85	3.815236258	0.000561613	0.686891476	K05204:GRIK4,GRIK4|K08045:d1616eca-0643-4ca3-8247-dfefe77a7c6d|K16342:LOC101794571|K04348:PPP3CC|K08041:ADCY1|K04371:MAPK1,MAPK1|K04630:LOC101797591|K13576:SLC38A3,SLC38A3|K01425:GLS,GLS	https://www.kegg.jp/kegg-bin/show_pathway?ko04724/K05204%09red/K08045%09red/K16342%09red/K04348%09red/K08041%09red/K04371%09red/K04630%09red/K13576%09red/K01425%09red/
Adipocytokine signaling pathway	KEGG PATHWAY	ko04920	5	53	3.399319517	0.015411368	0.71392703	K04696:SOCS3,SOCS3|K07296:ADIPOQ|K07297:ADIPOR2|K07200:PRKAG3|K06259:CD36	https://www.kegg.jp/kegg-bin/show_pathway?ko04920/K04696%09red/K07296%09red/K07297%09red/K07200%09red/K06259%09red/
Pertussis	KEGG PATHWAY	ko05133	8	79	3.648889811	0.00151483	0.720051077	K04729:MYD88,MYD88|K05842:TICAM1,TICAM1,TICAM1,TICAM1|K04379:de030ec8-9db7-4ab2-8ce8-ee97b86a294b,de030ec8-9db7-4ab2-8ce8-ee97b86a294b|K04371:MAPK1,MAPK1|K10067:SFTPA|K05403:TIRAP|K05405:IL6|K04630:LOC101797591	https://www.kegg.jp/kegg-bin/show_pathway?ko05133/K04729%09red/K05842%09red/K04379%09red/K04371%09red/K10067%09red/K05403%09red/K05405%09red/K04630%09red/
Tryptophan metabolism	KEGG PATHWAY	ko00380	5	66	2.729756582	0.035980663	0.720051077	K00128:LOC101792386|K00825:AADAT|K00543:ASMT|K00816:KYAT1|K00157:AOX1	https://www.kegg.jp/kegg-bin/show_pathway?ko00380/K00128%09red/K00825%09red/K00543%09red/K00816%09red/K00157%09red/
MAPK signaling pathway - fly	KEGG PATHWAY	ko04013	6	84	2.573770492	0.029059183	0.741671071	K04426:MAP3K5,MAP3K5|K04432:MAP2K3|K17536:LOC101797884|K20234:DOK2|K04371:MAPK1,MAPK1|K14290:XPO1	https://www.kegg.jp/kegg-bin/show_pathway?ko04013/K04426%09red/K04432%09red/K17536%09red/K20234%09red/K04371%09red/K14290%09red/
Phospholipase D signaling pathway	KEGG PATHWAY	ko04072	7	99	2.54777281	0.020077018	0.760094959	K07208:RHEB|K08041:ADCY1|K08045:d1616eca-0643-4ca3-8247-dfefe77a7c6d|K08091:GAB2|K16342:LOC101794571|K04294:LPAR3,LPAR3,LPAR3|K04371:MAPK1,MAPK1	https://www.kegg.jp/kegg-bin/show_pathway?ko04072/K07208%09red/K08041%09red/K08045%09red/K08091%09red/K16342%09red/K04294%09red/K04371%09red/
Alcoholism	KEGG PATHWAY	ko05034	8	83	3.4730397	0.002081987	0.809233273	K15840:41c1c4a7-0f97-42e5-b29a-adf16435d935,41c1c4a7-0f97-42e5-b29a-adf16435d935|K08045:d1616eca-0643-4ca3-8247-dfefe77a7c6d|K11253:LOC110351446|K05256:CRH|K04371:MAPK1,MAPK1|K11303:HAT1,HAT1|K04630:LOC101797591|K11251:LOC101796281,LOC101796281	https://www.kegg.jp/kegg-bin/show_pathway?ko05034/K15840%09red/K08045%09red/K11253%09red/K05256%09red/K04371%09red/K11303%09red/K04630%09red/K11251%09red/
Protein processing in endoplasmic reticulum	KEGG PATHWAY	ko04141	8	140	2.059016393	0.04116805	0.847276057	K12670:DDOST|K10578:UBE2J1|K07953:SAR1B|K04556:PRKN|K14018:PLAA|K04426:MAP3K5,MAP3K5|K14006:SEC23B,SEC23A|K14004:LOC113841666	https://www.kegg.jp/kegg-bin/show_pathway?ko04141/K12670%09red/K10578%09red/K07953%09red/K04556%09red/K14018%09red/K04426%09red/K14006%09red/K14004%09red/
Inflammatory mediator regulation of TRP channels	KEGG PATHWAY	ko04750	7	67	3.764619525	0.002474321	0.860043044	K04828:ASIC2|K08041:ADCY1|K04432:MAP2K3|K08045:d1616eca-0643-4ca3-8247-dfefe77a7c6d|K18051:PRKCH|K16342:LOC101794571|K03915:BDKRB1	https://www.kegg.jp/kegg-bin/show_pathway?ko04750/K04828%09red/K08041%09red/K04432%09red/K08045%09red/K18051%09red/K16342%09red/K03915%09red/
Pathways in cancer	KEGG PATHWAY	ko05200	21	316	2.394583939	0.000193309	0.872114968	K04198:EDNRB|K04236:F2RL3|K08736:MSH3,MSH3|K03915:BDKRB1|K08045:d1616eca-0643-4ca3-8247-dfefe77a7c6d|K06485:ITGA6|K04462:767786dd-129f-4ad6-a090-734e5a0fbdbc,767786dd-129f-4ad6-a090-734e5a0fbdbc|K05637:LAMA2,LAMA2|K08041:ADCY1|K05449:VEGFC,VEGFC,VEGFC,VEGFC|K04379:de030ec8-9db7-4ab2-8ce8-ee97b86a294b,de030ec8-9db7-4ab2-8ce8-ee97b86a294b|K04371:MAPK1,MAPK1|K04189:CXCR4|K04350:RASGRP1,RASGRP1|K0540…	https://www.kegg.jp/kegg-bin/show_pathway?ko05200/K04198%09red/K04236%09red/K08736%09red/K03915%09red/K08045%09red/K06485%09red/K04462%09red/K05637%09red/K08041%09red/K05449%09red/K04379%09red/K04371%09red/K04189%09red/K04350%09red/K05405%09red/K04294%09red/K04630%09red/K11987%09red/K08530%09red/K10055%09red/K06620%09red/
Thyroid hormone synthesis	KEGG PATHWAY	ko04918	4	49	2.941451991	0.046427268	0.900327696	K00432:GPX3|K08041:ADCY1|K08045:d1616eca-0643-4ca3-8247-dfefe77a7c6d|K00383:GSR,GSR	https://www.kegg.jp/kegg-bin/show_pathway?ko04918/K00432%09red/K08041%09red/K08045%09red/K00383%09red/
Renin secretion	KEGG PATHWAY	ko04924	5	46	3.91660727	0.008607659	0.904121602	K04630:LOC101797591|K08045:d1616eca-0643-4ca3-8247-dfefe77a7c6d|K04348:PPP3CC|K01363:CTSB|K05262:LOC113842181	https://www.kegg.jp/kegg-bin/show_pathway?ko04924/K04630%09red/K08045%09red/K04348%09red/K01363%09red/K05262%09red/
Melanogenesis	KEGG PATHWAY	ko04916	6	67	3.226816736	0.010506828	0.944362333	K04198:EDNRB|K08041:ADCY1|K08045:d1616eca-0643-4ca3-8247-dfefe77a7c6d|K16366:EDN1|K04371:MAPK1,MAPK1|K04630:LOC101797591	https://www.kegg.jp/kegg-bin/show_pathway?ko04916/K04198%09red/K08041%09red/K08045%09red/K16366%09red/K04371%09red/K04630%09red/
Morphine addiction	KEGG PATHWAY	ko05032	7	64	3.941086066	0.0018967	0.961533678	K08041:ADCY1|K08045:d1616eca-0643-4ca3-8247-dfefe77a7c6d|K05190:LOC101798492|K04999:KCNJ5,KCNJ5|K04439:ARRB1|K04630:LOC101797591|K04215:OPRM1	https://www.kegg.jp/kegg-bin/show_pathway?ko05032/K08041%09red/K08045%09red/K05190%09red/K04999%09red/K04439%09red/K04630%09red/K04215%09red/
Drug metabolism - cytochrome P450	KEGG PATHWAY	ko00982	4	24	6.005464481	0.003984541	0.961533678	K00129:LOC101796911|K00699:LOC101796668,LOC101796668|K00485:LOC101800205|K00157:AOX1	https://www.kegg.jp/kegg-bin/show_pathway?ko00982/K00129%09red/K00699%09red/K00485%09red/K00157%09red/
