# Supplementary material for: Profiling Analysis of N6-Methyladenosine mRNA Methylation Reveals Differential m6A Patterns during the Embryonic Skeletal Muscle Development of Ducks
Source: Animals (Basel). 2022 Sep 28;12(19):2593. doi: 10.3390/ani12192593 (PMC9559603; doi:10.3390/ani12192593)
Supplement: Supplementary file 1 [file animals-12-02593-s001.zip › Table S8.xls]

Term	Database	ID	Input_number	Background_number	Rich_factor	P_Value	FDR	Input	Hyperlink
Neuroactive ligand-receptor interaction	KEGG PATHWAY	ko04080	31	279	3.131054131	1.55E-08	0.615020183	K05185:LOC101802277,LOC101802277|K05186:GABRG1|K05181:GABRB2|K05227:EDN3|K05209:GRIN2A,GRIN2A|K04809:CHRNA7|K04234:F2RL1|K05175:GABRA1,GABRA5,GABRA4,GABRA2|K04588:SCTR|K04146:DRD3|K04587:ADCYAP1R1|K04210:GPR83|K04583:GCGR|K04259:PTGER2|K05195:GLRA3|K05253:TRH|K05257:UCN3|K04815:CHRNB4|K04285:MTNR1A,MTNR1A|K04213:OPRD1,OPRD1|K04144:DRD1|K04174:LOC113845354|K05264:VIP|K04303:LOC101796197|K04153:HTR…	https://www.kegg.jp/kegg-bin/show_pathway?ko04080/K05185%09red/K05186%09red/K05181%09red/K05227%09red/K05209%09red/K04809%09red/K04234%09red/K05175%09red/K04588%09red/K04146%09red/K04587%09red/K04210%09red/K04583%09red/K04259%09red/K05195%09red/K05253%09red/K05257%09red/K04815%09red/K04285%09red/K04213%09red/K04144%09red/K04174%09red/K05264%09red/K04303%09red/K04153%09red/K04269%09red/K04615%09re…
PI3K-Akt signaling pathway	KEGG PATHWAY	ko04151	27	240	3.170192308	1.05E-07	0.050424066	K16332:RBL2|K04374:ATF4|K09420:MYB|K08266:MLST8|K03900:VWF|K13304:SGK3|K04358:FGF14,FGF5,FGF6,FGF4|K06249:RELN|K06247:LAMC3,LAMC3|K06245:LAMB4|K11583:PPP2R3C|K01084:G6PC|K05467:ANGPT4|K04549:GNGT2|K18497:FGF2|K05855:SYK|K08390:LPAR5,LPAR5,LPAR5|K06525:ITGB4|K05459:IGF1|K04659:THBS4|K06493:ITGB3|K06589:ITGB6|K05093:FGFR2|K06587:ITGA11,ITGA11|K05103:EPHA2|K06237:COL4A4,COL4A4|K08131:COL9A1,COL9A1,C…	https://www.kegg.jp/kegg-bin/show_pathway?ko04151/K16332%09red/K04374%09red/K09420%09red/K08266%09red/K03900%09red/K13304%09red/K04358%09red/K06249%09red/K06247%09red/K06245%09red/K11583%09red/K01084%09red/K05467%09red/K04549%09red/K18497%09red/K05855%09red/K08390%09red/K06525%09red/K05459%09red/K04659%09red/K06493%09red/K06589%09red/K05093%09red/K06587%09red/K05103%09red/K06237%09red/K08131%09re…
ECM-receptor interaction	KEGG PATHWAY	ko04512	13	60	6.105555556	1.32E-07	0.851033635	K06525:ITGB4|K03900:VWF|K04659:THBS4|K06493:ITGB3|K06589:ITGB6|K06258:SV2A,SV2C,SV2C,SV2C|K06587:ITGA11,ITGA11|K06255:6eedac56-73df-4aae-bd2a-22449de0b991,6eedac56-73df-4aae-bd2a-22449de0b991|K06249:RELN|K06247:LAMC3,LAMC3|K06245:LAMB4|K06237:COL4A4,COL4A4|K08131:COL9A1,COL9A1,COL9A1,COL9A1	https://www.kegg.jp/kegg-bin/show_pathway?ko04512/K06525%09red/K03900%09red/K04659%09red/K06493%09red/K06589%09red/K06258%09red/K06587%09red/K06255%09red/K06249%09red/K06247%09red/K06245%09red/K06237%09red/K08131%09red/
GABAergic synapse	KEGG PATHWAY	ko04727	13	65	5.635897436	3.56E-07	0.47875748	K05185:LOC101802277,LOC101802277|K04851:CACNA1D|K04549:GNGT2|K05181:GABRB2|K04849:LOC101794161|K05175:GABRA1,GABRA5,GABRA4,GABRA2|K08048:7cfef49c-b7a6-4ae4-94a1-cd41a48c861a,7cfef49c-b7a6-4ae4-94a1-cd41a48c861a|K08043:ADCY3|K05186:GABRG1|K01915:LOC101794703|K04630:GNAI2|K15375:PLCL1|K04615:GABBR2,GABBR2	https://www.kegg.jp/kegg-bin/show_pathway?ko04727/K05185%09red/K04851%09red/K04549%09red/K05181%09red/K04849%09red/K05175%09red/K08048%09red/K08043%09red/K05186%09red/K01915%09red/K04630%09red/K15375%09red/K04615%09red/
Pathways in cancer	KEGG PATHWAY	ko05200	30	316	2.67526777	8.57E-07	0.519842107	K08048:7cfef49c-b7a6-4ae4-94a1-cd41a48c861a,7cfef49c-b7a6-4ae4-94a1-cd41a48c861a|K00182:WNT2B,WNT2B|K11224:LOC101790203|K08527:f3999bf1-6315-4ebb-9e5e-9814b3ef63f7,f3999bf1-6315-4ebb-9e5e-9814b3ef63f7|K08043:ADCY3|K06237:COL4A4,COL4A4|K05093:FGFR2|K00312:WNT3,WNT3,WNT3A,WNT3A|K04358:FGF14,FGF5,FGF6,FGF4|K08367:RUNX1|K06247:LAMC3,LAMC3|K06245:LAMB4|K11988:SHH,SHH|K04259:PTGER2|K04685:LOC113840388|…	https://www.kegg.jp/kegg-bin/show_pathway?ko05200/K08048%09red/K00182%09red/K11224%09red/K08527%09red/K08043%09red/K06237%09red/K05093%09red/K00312%09red/K04358%09red/K08367%09red/K06247%09red/K06245%09red/K11988%09red/K04259%09red/K04685%09red/K04549%09red/K16063%09red/K18497%09red/K09289%09red/K01064%09red/K01357%09red/K08390%09red/K00445%09red/K05459%09red/K04635%09red/K04630%09red/K13377%09re…
cAMP signaling pathway	KEGG PATHWAY	ko04024	19	146	3.667193537	9.35E-07	0.000132071	K04955:HCN2|K04851:CACNA1D|K05730:VAV1|K04950:CNGA3,af5fc9e1-d188-4063-99f1-d07a01f0ecbe|K04409:PAK1,PAK1,PAK1,PAK1,PAK1|K04962:RYR2,RYR2|K08048:7cfef49c-b7a6-4ae4-94a1-cd41a48c861a,7cfef49c-b7a6-4ae4-94a1-cd41a48c861a|K13293:007c484b-f748-4645-81d2-63222f1bd579,007c484b-f748-4645-81d2-63222f1bd579|K05209:GRIN2A,GRIN2A|K04260:PTGER3|K01540:ATP1B4|K00232:d538aa3b-7335-42f1-ab4d-70e92a6ad742,d538aa…	https://www.kegg.jp/kegg-bin/show_pathway?ko04024/K04955%09red/K04851%09red/K05730%09red/K04950%09red/K04409%09red/K04962%09red/K08048%09red/K13293%09red/K05209%09red/K04260%09red/K01540%09red/K00232%09red/K08043%09red/K04630%09red/K04587%09red/K04144%09red/K04615%09red/K04153%09red/K04259%09red/
Dilated cardiomyopathy	KEGG PATHWAY	ko05414	14	82	4.811131957	9.71E-07	0.399008597	K08043:ADCY3|K04851:CACNA1D|K04962:RYR2,RYR2|K06525:ITGB4|K04858:CACNA2D1|K04859:LOC113845023|K05459:IGF1|K08048:7cfef49c-b7a6-4ae4-94a1-cd41a48c861a,7cfef49c-b7a6-4ae4-94a1-cd41a48c861a|K04868:CACNG3|K06493:ITGB3|K06587:ITGA11,ITGA11|K12563:SGCD|K13377:TGFB3|K06589:ITGB6	https://www.kegg.jp/kegg-bin/show_pathway?ko05414/K08043%09red/K04851%09red/K04962%09red/K06525%09red/K04858%09red/K04859%09red/K05459%09red/K08048%09red/K04868%09red/K06493%09red/K06587%09red/K12563%09red/K13377%09red/K06589%09red/
MAPK signaling pathway	KEGG PATHWAY	ko04010	22	191	3.245804806	1.09E-06	0.000314668	K04415:MAP3K8|K04352:RASA1|K04409:PAK1,PAK1,PAK1,PAK1,PAK1|K04849:LOC101794161|K05093:FGFR2|K04358:FGF14,FGF5,FGF6,FGF4|K04868:CACNG3|K16342:PLA2G4F|K04373:RPS6KA1|K04374:ATF4|K04426:MAP3K6|K04420:MAP3K2|K18497:FGF2|K04403:TAB1|K04356:NTF3|K04851:CACNA1D|K04852:e414c170-6eaf-4ed6-9b93-bc8345118f1f|K04856:1a33af56-68f1-4efe-af2b-596b25577ee8,1a33af56-68f1-4efe-af2b-596b25577ee8,1a33af56-68f1-4efe-…	https://www.kegg.jp/kegg-bin/show_pathway?ko04010/K04415%09red/K04352%09red/K04409%09red/K04849%09red/K05093%09red/K04358%09red/K04868%09red/K16342%09red/K04373%09red/K04374%09red/K04426%09red/K04420%09red/K18497%09red/K04403%09red/K04356%09red/K04851%09red/K04852%09red/K04856%09red/K04858%09red/K04859%09red/K13377%09red/K04459%09red/
Retrograde endocannabinoid signaling	KEGG PATHWAY	ko04723	13	74	4.95045045	1.70E-06	0.266059447	K05185:LOC101802277,LOC101802277|K04851:CACNA1D|K04549:GNGT2|K05181:GABRB2|K04849:LOC101794161|K13700:ABHD6|K05175:GABRA1,GABRA5,GABRA4,GABRA2|K15528:LOC101794092|K08048:7cfef49c-b7a6-4ae4-94a1-cd41a48c861a,7cfef49c-b7a6-4ae4-94a1-cd41a48c861a|K04959:ITPR2,ITPR2|K08043:ADCY3|K05186:GABRG1|K04630:GNAI2	https://www.kegg.jp/kegg-bin/show_pathway?ko04723/K05185%09red/K04851%09red/K04549%09red/K05181%09red/K04849%09red/K13700%09red/K05175%09red/K15528%09red/K08048%09red/K04959%09red/K08043%09red/K05186%09red/K04630%09red/
Morphine addiction	KEGG PATHWAY	ko05032	12	64	5.283653846	2.08E-06	0.001462064	K05185:LOC101802277,LOC101802277|K08043:ADCY3|K04549:GNGT2|K05181:GABRB2|K04849:LOC101794161|K05175:GABRA1,GABRA5,GABRA4,GABRA2|K08048:7cfef49c-b7a6-4ae4-94a1-cd41a48c861a,7cfef49c-b7a6-4ae4-94a1-cd41a48c861a|K13293:007c484b-f748-4645-81d2-63222f1bd579,007c484b-f748-4645-81d2-63222f1bd579|K05186:GABRG1|K04630:GNAI2|K04144:DRD1|K04615:GABBR2,GABBR2	https://www.kegg.jp/kegg-bin/show_pathway?ko05032/K05185%09red/K08043%09red/K04549%09red/K05181%09red/K04849%09red/K05175%09red/K08048%09red/K13293%09red/K05186%09red/K04630%09red/K04144%09red/K04615%09red/
Circadian entrainment	KEGG PATHWAY	ko04713	13	76	4.820175439	2.32E-06	0.189428349	K08043:ADCY3|K04851:CACNA1D|K04962:RYR2,RYR2|K04549:GNGT2|K04856:1a33af56-68f1-4efe-af2b-596b25577ee8,1a33af56-68f1-4efe-af2b-596b25577ee8,1a33af56-68f1-4efe-af2b-596b25577ee8,1a33af56-68f1-4efe-af2b-596b25577ee8|K08048:7cfef49c-b7a6-4ae4-94a1-cd41a48c861a,7cfef49c-b7a6-4ae4-94a1-cd41a48c861a|K05209:GRIN2A,GRIN2A|K04285:MTNR1A,MTNR1A|K12319:GUCY1B1|K13240:NOS1|K04630:GNAI2|K16513:20f18cb4-e74a-4b…	https://www.kegg.jp/kegg-bin/show_pathway?ko04713/K08043%09red/K04851%09red/K04962%09red/K04549%09red/K04856%09red/K08048%09red/K05209%09red/K04285%09red/K12319%09red/K13240%09red/K04630%09red/K16513%09red/K04587%09red/
Insulin secretion	KEGG PATHWAY	ko04911	12	67	5.047072331	3.45E-06	0.920143075	K08043:ADCY3|K05258:GIP|K04962:RYR2,RYR2|K16882:PCLO,PCLO|K04851:CACNA1D|K08048:7cfef49c-b7a6-4ae4-94a1-cd41a48c861a,7cfef49c-b7a6-4ae4-94a1-cd41a48c861a|K04374:ATF4|K01540:ATP1B4|K04587:ADCYAP1R1|K18211:SNAP25|K15297:RIMS2,RIMS2|K04635:bb37c617-9fbc-4d71-8f31-304ff56a12bd,bb37c617-9fbc-4d71-8f31-304ff56a12bd	https://www.kegg.jp/kegg-bin/show_pathway?ko04911/K08043%09red/K05258%09red/K04962%09red/K16882%09red/K04851%09red/K08048%09red/K04374%09red/K01540%09red/K04587%09red/K18211%09red/K15297%09red/K04635%09red/
Signaling pathways regulating pluripotency of stem cells	KEGG PATHWAY	ko04550	15	108	3.913817664	5.86E-06	3.99E-05	K00182:WNT2B,WNT2B|K18487:ZIC3,ZIC3|K18497:FGF2|K05093:FGFR2|K00312:WNT3,WNT3,WNT3A,WNT3A|K05459:IGF1|K18489:DLX5,DLX5|K04667:INHBC,INHBC,INHBB|K01064:WNT9B|K01357:WNT10A,WNT10A,WNT10A|K08553:ESRRB,ESRRB|K05419:LIF|K11488:PCGF3,LOC101793198|K00445:WNT6|K00572:WNT7A,WNT7A,WNT7A,WNT7A,WNT7B,WNT7B,WNT7B,WNT7B	https://www.kegg.jp/kegg-bin/show_pathway?ko04550/K00182%09red/K18487%09red/K18497%09red/K05093%09red/K00312%09red/K05459%09red/K18489%09red/K04667%09red/K01064%09red/K01357%09red/K08553%09red/K05419%09red/K11488%09red/K00445%09red/K00572%09red/
Calcium signaling pathway	KEGG PATHWAY	ko04020	17	141	3.397526823	9.97E-06	0.353881158	K08043:ADCY3|K04851:CACNA1D|K04852:e414c170-6eaf-4ed6-9b93-bc8345118f1f|K04856:1a33af56-68f1-4efe-af2b-596b25577ee8,1a33af56-68f1-4efe-af2b-596b25577ee8,1a33af56-68f1-4efe-af2b-596b25577ee8,1a33af56-68f1-4efe-af2b-596b25577ee8|K04849:LOC101794161|K05871:PTK2B|K08048:7cfef49c-b7a6-4ae4-94a1-cd41a48c861a,7cfef49c-b7a6-4ae4-94a1-cd41a48c861a|K04959:ITPR2,ITPR2|K04962:RYR2,RYR2|K04248:LOC101803098|K0…	https://www.kegg.jp/kegg-bin/show_pathway?ko04020/K08043%09red/K04851%09red/K04852%09red/K04856%09red/K04849%09red/K05871%09red/K08048%09red/K04959%09red/K04962%09red/K04248%09red/K05209%09red/K04635%09red/K13240%09red/K04809%09red/K04144%09red/K04636%09red/K04260%09red/
Hypertrophic cardiomyopathy (HCM)	KEGG PATHWAY	ko05410	12	75	4.508717949	1.16E-05	0.12653799	K04851:CACNA1D|K04962:RYR2,RYR2|K06525:ITGB4|K04858:CACNA2D1|K04859:LOC113845023|K05459:IGF1|K04868:CACNG3|K06493:ITGB3|K06587:ITGA11,ITGA11|K12563:SGCD|K13377:TGFB3|K06589:ITGB6	https://www.kegg.jp/kegg-bin/show_pathway?ko05410/K04851%09red/K04962%09red/K06525%09red/K04858%09red/K04859%09red/K05459%09red/K04868%09red/K06493%09red/K06587%09red/K12563%09red/K13377%09red/K06589%09red/
Proteoglycans in cancer	KEGG PATHWAY	ko05205	18	162	3.131054131	1.72E-05	0.655027255	K04660:DCN|K00182:WNT2B,WNT2B|K18497:FGF2|K04409:PAK1,PAK1,PAK1,PAK1,PAK1|K00312:WNT3,WNT3,WNT3A,WNT3A|K05459:IGF1|K09069:LOC101790674,LOC101790674,LOC101790674|K04959:ITPR2,ITPR2|K06493:ITGB3|K01064:WNT9B|K08550:97717df5-85c9-409c-b480-491de14099c4|K06255:6eedac56-73df-4aae-bd2a-22449de0b991,6eedac56-73df-4aae-bd2a-22449de0b991|K09295:HOXD10|K00445:WNT6|K01357:WNT10A,WNT10A,WNT10A|K11988:SHH,SHH…	https://www.kegg.jp/kegg-bin/show_pathway?ko05205/K04660%09red/K00182%09red/K18497%09red/K04409%09red/K00312%09red/K05459%09red/K09069%09red/K04959%09red/K06493%09red/K01064%09red/K08550%09red/K06255%09red/K09295%09red/K00445%09red/K01357%09red/K11988%09red/K00572%09red/K08109%09red/
Nicotine addiction	KEGG PATHWAY	ko05033	7	27	7.305792972	3.22E-05	0.999999978	K05185:LOC101802277,LOC101802277|K05186:GABRG1|K05181:GABRB2|K04849:LOC101794161|K05175:GABRA1,GABRA5,GABRA4,GABRA2|K05209:GRIN2A,GRIN2A|K04809:CHRNA7	https://www.kegg.jp/kegg-bin/show_pathway?ko05033/K05185%09red/K05186%09red/K05181%09red/K04849%09red/K05175%09red/K05209%09red/K04809%09red/
Gap junction	KEGG PATHWAY	ko04540	10	59	4.776184268	3.74E-05	0.110405133	K08043:ADCY3|K04420:MAP3K2|K07374:LOC101795602|K08048:7cfef49c-b7a6-4ae4-94a1-cd41a48c861a,7cfef49c-b7a6-4ae4-94a1-cd41a48c861a|K04959:ITPR2,ITPR2|K07375:TUBB1,TUBB1|K12319:GUCY1B1|K04630:GNAI2|K04144:DRD1|K04635:bb37c617-9fbc-4d71-8f31-304ff56a12bd,bb37c617-9fbc-4d71-8f31-304ff56a12bd	https://www.kegg.jp/kegg-bin/show_pathway?ko04540/K08043%09red/K04420%09red/K07374%09red/K08048%09red/K04959%09red/K07375%09red/K12319%09red/K04630%09red/K04144%09red/K04635%09red/
Glutamatergic synapse	KEGG PATHWAY	ko04724	12	85	3.978280543	4.26E-05	0.369217199	K08043:ADCY3|K04851:CACNA1D|K04549:GNGT2|K08048:7cfef49c-b7a6-4ae4-94a1-cd41a48c861a,7cfef49c-b7a6-4ae4-94a1-cd41a48c861a|K04959:ITPR2,ITPR2|K05209:GRIN2A,GRIN2A|K16342:PLA2G4F|K05612:4101b97c-6f5f-4cd9-b366-b96b9d3f7034,4101b97c-6f5f-4cd9-b366-b96b9d3f7034|K01915:LOC101794703|K04630:GNAI2|K15008:DLGAP1|K15009:e71c2772-371b-4188-a134-ce1303e2720c,e71c2772-371b-4188-a134-ce1303e2720c,e71c2772-371b…	https://www.kegg.jp/kegg-bin/show_pathway?ko04724/K08043%09red/K04851%09red/K04549%09red/K08048%09red/K04959%09red/K05209%09red/K16342%09red/K05612%09red/K01915%09red/K04630%09red/K15008%09red/K15009%09red/
Cholinergic synapse	KEGG PATHWAY	ko04725	12	88	3.842657343	6.04E-05	0.670214511	K08043:ADCY3|K04851:CACNA1D|K04549:GNGT2|K04849:LOC101794161|K08048:7cfef49c-b7a6-4ae4-94a1-cd41a48c861a,7cfef49c-b7a6-4ae4-94a1-cd41a48c861a|K04959:ITPR2,ITPR2|K04374:ATF4|K04815:CHRNB4|K04630:GNAI2|K04809:CHRNA7|K04928:KCNQ3|K04635:bb37c617-9fbc-4d71-8f31-304ff56a12bd,bb37c617-9fbc-4d71-8f31-304ff56a12bd	https://www.kegg.jp/kegg-bin/show_pathway?ko04725/K08043%09red/K04851%09red/K04549%09red/K04849%09red/K08048%09red/K04959%09red/K04374%09red/K04815%09red/K04630%09red/K04809%09red/K04928%09red/K04635%09red/
Arrhythmogenic right ventricular cardiomyopathy (ARVC)	KEGG PATHWAY	ko05412	10	65	4.33530572	8.82E-05	0.568345914	K04851:CACNA1D|K04962:RYR2,RYR2|K06525:ITGB4|K04858:CACNA2D1|K04859:LOC113845023|K04868:CACNG3|K06493:ITGB3|K06587:ITGA11,ITGA11|K12563:SGCD|K06589:ITGB6	https://www.kegg.jp/kegg-bin/show_pathway?ko05412/K04851%09red/K04962%09red/K06525%09red/K04858%09red/K04859%09red/K04868%09red/K06493%09red/K06587%09red/K12563%09red/K06589%09red/
Axon guidance	KEGG PATHWAY	ko04360	14	121	3.260436533	9.51E-05	0.004007835	K04352:RASA1|K04966:TRPC3|K06521:2587607d-c4fa-446a-a23a-ed4b32c2afcf,2587607d-c4fa-446a-a23a-ed4b32c2afcf|K06840:SEMA3E,SEMA3E|K04409:PAK1,PAK1,PAK1,PAK1,PAK1|K04967:TRPC4,TRPC4|K06838:SLIT1|K05735:PAK6,PAK6,PAK6|K16621:BMP7|K04630:GNAI2|K11988:SHH,SHH|K16359:NTNG2|K05103:EPHA2|K05111:67923b3d-0c28-4aa1-bfe3-59ffdbb950c2	https://www.kegg.jp/kegg-bin/show_pathway?ko04360/K04352%09red/K04966%09red/K06521%09red/K06840%09red/K04409%09red/K04967%09red/K06838%09red/K05735%09red/K16621%09red/K04630%09red/K11988%09red/K16359%09red/K05103%09red/K05111%09red/
Inflammatory mediator regulation of TRP channels	KEGG PATHWAY	ko04750	10	67	4.205893609	0.000114769	0.353881158	K04234:F2RL1|K08043:ADCY3|K05459:IGF1|K08048:7cfef49c-b7a6-4ae4-94a1-cd41a48c861a,7cfef49c-b7a6-4ae4-94a1-cd41a48c861a|K04959:ITPR2,ITPR2|K16342:PLA2G4F|K18052:PRKCQ|K04269:P2RY2|K04261:PTGER4|K04259:PTGER2	https://www.kegg.jp/kegg-bin/show_pathway?ko04750/K04234%09red/K08043%09red/K05459%09red/K08048%09red/K04959%09red/K16342%09red/K18052%09red/K04269%09red/K04261%09red/K04259%09red/
Dopaminergic synapse	KEGG PATHWAY	ko04728	11	83	3.734630831	0.000158427	0.743534402	K00274:LOC101792808,LOC101792808,LOC101792808|K04851:CACNA1D|K04549:GNGT2|K04849:LOC101794161|K04959:ITPR2,ITPR2|K05209:GRIN2A,GRIN2A|K04146:DRD3|K04630:GNAI2|K04144:DRD1|K11583:PPP2R3C|K04374:ATF4	https://www.kegg.jp/kegg-bin/show_pathway?ko04728/K00274%09red/K04851%09red/K04549%09red/K04849%09red/K04959%09red/K05209%09red/K04146%09red/K04630%09red/K04144%09red/K11583%09red/K04374%09red/
Long-term depression	KEGG PATHWAY	ko04730	8	45	5.00968661	0.000159333	0.006034366	K05459:IGF1|K04959:ITPR2,ITPR2|K05256:LOC113845734|K16342:PLA2G4F|K12319:GUCY1B1|K04630:GNAI2|K13240:NOS1|K04635:bb37c617-9fbc-4d71-8f31-304ff56a12bd,bb37c617-9fbc-4d71-8f31-304ff56a12bd	https://www.kegg.jp/kegg-bin/show_pathway?ko04730/K05459%09red/K04959%09red/K05256%09red/K16342%09red/K12319%09red/K04630%09red/K13240%09red/K04635%09red/
Focal adhesion	KEGG PATHWAY	ko04510	15	148	2.856029106	0.000241952	0.823580515	K05730:VAV1|K04409:PAK1,PAK1,PAK1,PAK1,PAK1|K06525:ITGB4|K05459:IGF1|K04659:THBS4|K06493:ITGB3|K06589:ITGB6|K03900:VWF|K06587:ITGA11,ITGA11|K06249:RELN|K06247:LAMC3,LAMC3|K06245:LAMB4|K05735:PAK6,PAK6,PAK6|K06237:COL4A4,COL4A4|K08131:COL9A1,COL9A1,COL9A1,COL9A1	https://www.kegg.jp/kegg-bin/show_pathway?ko04510/K05730%09red/K04409%09red/K06525%09red/K05459%09red/K04659%09red/K06493%09red/K06589%09red/K03900%09red/K06587%09red/K06249%09red/K06247%09red/K06245%09red/K05735%09red/K06237%09red/K08131%09red/
GnRH signaling pathway	KEGG PATHWAY	ko04912	9	63	4.025641026	0.000352611	0.107983405	K08043:ADCY3|K04851:CACNA1D|K04420:MAP3K2|K04959:ITPR2,ITPR2|K08048:7cfef49c-b7a6-4ae4-94a1-cd41a48c861a,7cfef49c-b7a6-4ae4-94a1-cd41a48c861a|K05871:PTK2B|K04374:ATF4|K16342:PLA2G4F|K04635:bb37c617-9fbc-4d71-8f31-304ff56a12bd,bb37c617-9fbc-4d71-8f31-304ff56a12bd	https://www.kegg.jp/kegg-bin/show_pathway?ko04912/K08043%09red/K04851%09red/K04420%09red/K04959%09red/K08048%09red/K05871%09red/K04374%09red/K16342%09red/K04635%09red/
Ovarian steroidogenesis	KEGG PATHWAY	ko04913	7	39	5.057856673	0.000386503	0.021672796	K08043:ADCY3|K05459:IGF1|K08048:7cfef49c-b7a6-4ae4-94a1-cd41a48c861a,7cfef49c-b7a6-4ae4-94a1-cd41a48c861a|K16620:BMP6|K16342:PLA2G4F|K04248:LOC101803098|K13373:HSD17B7	https://www.kegg.jp/kegg-bin/show_pathway?ko04913/K08043%09red/K05459%09red/K08048%09red/K16620%09red/K16342%09red/K04248%09red/K13373%09red/
Adrenergic signaling in cardiomyocytes	KEGG PATHWAY	ko04261	11	92	3.369286511	0.00039668	0.399008597	K08043:ADCY3|K04851:CACNA1D|K04962:RYR2,RYR2|K04858:CACNA2D1|K04859:LOC113845023|K08048:7cfef49c-b7a6-4ae4-94a1-cd41a48c861a,7cfef49c-b7a6-4ae4-94a1-cd41a48c861a|K04868:CACNG3|K01540:ATP1B4|K04630:GNAI2|K11583:PPP2R3C|K04374:ATF4	https://www.kegg.jp/kegg-bin/show_pathway?ko04261/K08043%09red/K04851%09red/K04962%09red/K04858%09red/K04859%09red/K08048%09red/K04868%09red/K01540%09red/K04630%09red/K11583%09red/K04374%09red/
Hippo signaling pathway	KEGG PATHWAY	ko04390	12	109	3.102328864	0.000472041	0.005148428	K00182:WNT2B,WNT2B|K00312:WNT3,WNT3,WNT3A,WNT3A|K16620:BMP6|K16621:BMP7|K01064:WNT9B|K04664:GDF5,GDF5|K16821:FRMD1|K00445:WNT6|K06092:PATJ,PATJ,PATJ|K13377:TGFB3|K01357:WNT10A,WNT10A,WNT10A|K00572:WNT7A,WNT7A,WNT7A,WNT7A,WNT7B,WNT7B,WNT7B,WNT7B	https://www.kegg.jp/kegg-bin/show_pathway?ko04390/K00182%09red/K00312%09red/K16620%09red/K16621%09red/K01064%09red/K04664%09red/K16821%09red/K00445%09red/K06092%09red/K13377%09red/K01357%09red/K00572%09red/
Adipocytokine signaling pathway	KEGG PATHWAY	ko04920	8	53	4.253507499	0.000511514	0.274125898	K04696:cf67d02f-9fdb-4d82-b39b-61991c5d8f4a,cf67d02f-9fdb-4d82-b39b-61991c5d8f4a|K05141:LOC101791359|K05872:NFKBIE|K15013:ACSBG2|K18052:PRKCQ|K01897:ACSL1,ACSL1|K07296:32f1b8b5-058d-423f-8980-7d98c545c151,32f1b8b5-058d-423f-8980-7d98c545c151|K01084:G6PC	https://www.kegg.jp/kegg-bin/show_pathway?ko04920/K04696%09red/K05141%09red/K05872%09red/K15013%09red/K18052%09red/K01897%09red/K07296%09red/K01084%09red/
Melanogenesis	KEGG PATHWAY	ko04916	9	67	3.785304248	0.000562286	0.310909536	K08043:ADCY3|K00182:WNT2B,WNT2B|K00312:WNT3,WNT3,WNT3A,WNT3A|K08048:7cfef49c-b7a6-4ae4-94a1-cd41a48c861a,7cfef49c-b7a6-4ae4-94a1-cd41a48c861a|K01064:WNT9B|K01357:WNT10A,WNT10A,WNT10A|K04630:GNAI2|K00445:WNT6|K00572:WNT7A,WNT7A,WNT7A,WNT7A,WNT7B,WNT7B,WNT7B,WNT7B	https://www.kegg.jp/kegg-bin/show_pathway?ko04916/K08043%09red/K00182%09red/K00312%09red/K08048%09red/K01064%09red/K01357%09red/K04630%09red/K00445%09red/K00572%09red/
Basal cell carcinoma	KEGG PATHWAY	ko05217	7	42	4.696581197	0.000618649	0.000609351	K00182:WNT2B,WNT2B|K00312:WNT3,WNT3,WNT3A,WNT3A|K01064:WNT9B|K01357:WNT10A,WNT10A,WNT10A|K00445:WNT6|K11988:SHH,SHH|K00572:WNT7A,WNT7A,WNT7A,WNT7A,WNT7B,WNT7B,WNT7B,WNT7B	https://www.kegg.jp/kegg-bin/show_pathway?ko05217/K00182%09red/K00312%09red/K01064%09red/K01357%09red/K00445%09red/K11988%09red/K00572%09red/
TGF-beta signaling pathway	KEGG PATHWAY	ko04350	9	69	3.675585284	0.000700234	0.001867388	K04685:LOC113840388|K04660:DCN|K16620:BMP6|K04658:NOG|K04677:LOC101795178|K04667:INHBC,INHBC,INHBB|K16621:BMP7|K04664:GDF5,GDF5|K13377:TGFB3	https://www.kegg.jp/kegg-bin/show_pathway?ko04350/K04685%09red/K04660%09red/K16620%09red/K04658%09red/K04677%09red/K04667%09red/K16621%09red/K04664%09red/K13377%09red/
Aldosterone synthesis and secretion	KEGG PATHWAY	ko04925	8	58	3.886825818	0.000948098	0.636552599	K08043:ADCY3|K04851:CACNA1D|K08558:NR4A2|K04856:1a33af56-68f1-4efe-af2b-596b25577ee8,1a33af56-68f1-4efe-af2b-596b25577ee8,1a33af56-68f1-4efe-af2b-596b25577ee8,1a33af56-68f1-4efe-af2b-596b25577ee8|K08048:7cfef49c-b7a6-4ae4-94a1-cd41a48c861a,7cfef49c-b7a6-4ae4-94a1-cd41a48c861a|K04959:ITPR2,ITPR2|K04374:ATF4|K04635:bb37c617-9fbc-4d71-8f31-304ff56a12bd,bb37c617-9fbc-4d71-8f31-304ff56a12bd	https://www.kegg.jp/kegg-bin/show_pathway?ko04925/K08043%09red/K04851%09red/K08558%09red/K04856%09red/K08048%09red/K04959%09red/K04374%09red/K04635%09red/
TNF signaling pathway	KEGG PATHWAY	ko04668	10	87	3.239021515	0.000986979	0.766545294	K04696:cf67d02f-9fdb-4d82-b39b-61991c5d8f4a,cf67d02f-9fdb-4d82-b39b-61991c5d8f4a|K05141:LOC101791359|K04426:MAP3K6|K04415:MAP3K8|K04403:TAB1|K04724:CFLAR,CFLAR,CFLAR|K10048:CEBPB|K11859:TNFAIP3,TNFAIP3|K05419:LIF|K04374:ATF4	https://www.kegg.jp/kegg-bin/show_pathway?ko04668/K04696%09red/K05141%09red/K04426%09red/K04415%09red/K04403%09red/K04724%09red/K10048%09red/K11859%09red/K05419%09red/K04374%09red/
Renin secretion	KEGG PATHWAY	ko04924	7	46	4.288182832	0.001086668	0.488449141	K04851:CACNA1D|K04959:ITPR2,ITPR2|K12319:GUCY1B1|K04630:GNAI2|K04587:ADCYAP1R1|K04261:PTGER4|K04259:PTGER2	https://www.kegg.jp/kegg-bin/show_pathway?ko04924/K04851%09red/K04959%09red/K12319%09red/K04630%09red/K04587%09red/K04261%09red/K04259%09red/
Oxytocin signaling pathway	KEGG PATHWAY	ko04921	11	111	2.792561793	0.001917201	0.739183644	K08043:ADCY3|K04851:CACNA1D|K04962:RYR2,RYR2|K04858:CACNA2D1|K04859:LOC113845023|K08048:7cfef49c-b7a6-4ae4-94a1-cd41a48c861a,7cfef49c-b7a6-4ae4-94a1-cd41a48c861a|K04959:ITPR2,ITPR2|K04868:CACNG3|K16342:PLA2G4F|K12319:GUCY1B1|K04630:GNAI2	https://www.kegg.jp/kegg-bin/show_pathway?ko04921/K08043%09red/K04851%09red/K04962%09red/K04858%09red/K04859%09red/K08048%09red/K04959%09red/K04868%09red/K16342%09red/K12319%09red/K04630%09red/
Aldosterone-regulated sodium reabsorption	KEGG PATHWAY	ko04960	5	26	5.41913215	0.001947833	0.021672796	K01540:ATP1B4|K05459:IGF1|K00071:HSD11B2|K04824:SCNN1A|K06644:SFN,SFN	https://www.kegg.jp/kegg-bin/show_pathway?ko04960/K01540%09red/K05459%09red/K00071%09red/K04824%09red/K06644%09red/
Estrogen signaling pathway	KEGG PATHWAY	ko04915	8	65	3.468244576	0.002012873	0.406477265	K08043:ADCY3|K08551:ESR2|K08048:7cfef49c-b7a6-4ae4-94a1-cd41a48c861a,7cfef49c-b7a6-4ae4-94a1-cd41a48c861a|K04959:ITPR2,ITPR2|K08550:97717df5-85c9-409c-b480-491de14099c4|K04630:GNAI2|K04615:GABBR2,GABBR2|K04374:ATF4	https://www.kegg.jp/kegg-bin/show_pathway?ko04915/K08043%09red/K08551%09red/K08048%09red/K04959%09red/K08550%09red/K04630%09red/K04615%09red/K04374%09red/
Vascular smooth muscle contraction	KEGG PATHWAY	ko04270	10	96	2.935363248	0.002099363	0.196591599	K08043:ADCY3|K04851:CACNA1D|K01047:PLA2G3,PLA2G12A,PLA2G12A|K05227:EDN3|K08048:7cfef49c-b7a6-4ae4-94a1-cd41a48c861a,7cfef49c-b7a6-4ae4-94a1-cd41a48c861a|K04959:ITPR2,ITPR2|K16342:PLA2G4F|K18052:PRKCQ|K12319:GUCY1B1|K04635:bb37c617-9fbc-4d71-8f31-304ff56a12bd,bb37c617-9fbc-4d71-8f31-304ff56a12bd	https://www.kegg.jp/kegg-bin/show_pathway?ko04270/K08043%09red/K04851%09red/K01047%09red/K05227%09red/K08048%09red/K04959%09red/K16342%09red/K18052%09red/K12319%09red/K04635%09red/
mTOR signaling pathway	KEGG PATHWAY	ko04150	11	113	2.74313592	0.002211606	0.244464879	K00182:WNT2B,WNT2B|K00312:WNT3,WNT3,WNT3A,WNT3A|K05459:IGF1|K01064:WNT9B|K08266:MLST8|K00445:WNT6|K02149:ATP6V1D,ATP6V1D|K04373:RPS6KA1|K01357:WNT10A,WNT10A,WNT10A|K08267:LOC101794767|K00572:WNT7A,WNT7A,WNT7A,WNT7A,WNT7B,WNT7B,WNT7B,WNT7B	https://www.kegg.jp/kegg-bin/show_pathway?ko04150/K00182%09red/K00312%09red/K05459%09red/K01064%09red/K08266%09red/K00445%09red/K02149%09red/K04373%09red/K01357%09red/K08267%09red/K00572%09red/
Alcoholism	KEGG PATHWAY	ko05034	9	83	3.055607044	0.002628841	0.47875748	K00274:LOC101792808,LOC101792808,LOC101792808|K04549:GNGT2|K11251:LOC101794184|K11253:LOC101798542|K05256:LOC113845734|K04630:GNAI2|K04144:DRD1|K05209:GRIN2A,GRIN2A|K04374:ATF4	https://www.kegg.jp/kegg-bin/show_pathway?ko05034/K00274%09red/K04549%09red/K11251%09red/K11253%09red/K05256%09red/K04630%09red/K04144%09red/K05209%09red/K04374%09red/
Phospholipase D signaling pathway	KEGG PATHWAY	ko04072	10	99	2.846412846	0.002640078	0.77547114	K08043:ADCY3|K13523:AGPAT4|K08048:7cfef49c-b7a6-4ae4-94a1-cd41a48c861a,7cfef49c-b7a6-4ae4-94a1-cd41a48c861a|K05871:PTK2B|K16342:PLA2G4F|K05855:SYK|K13509:AGPAT2|K00901:DGKI|K08390:LPAR5,LPAR5,LPAR5|K01528:LOC101801487,LOC101801487,LOC113844324	https://www.kegg.jp/kegg-bin/show_pathway?ko04072/K08043%09red/K13523%09red/K08048%09red/K05871%09red/K16342%09red/K05855%09red/K13509%09red/K00901%09red/K08390%09red/K01528%09red/
Serotonergic synapse	KEGG PATHWAY	ko04726	9	84	3.019230769	0.002854498	0.47875748	K00274:LOC101792808,LOC101792808,LOC101792808|K04851:CACNA1D|K04549:GNGT2|K05181:GABRB2|K04849:LOC101794161|K04959:ITPR2,ITPR2|K16342:PLA2G4F|K04630:GNAI2|K04153:HTR1F,HTR1F	https://www.kegg.jp/kegg-bin/show_pathway?ko04726/K00274%09red/K04851%09red/K04549%09red/K05181%09red/K04849%09red/K04959%09red/K16342%09red/K04630%09red/K04153%09red/
T cell receptor signaling pathway	KEGG PATHWAY	ko04660	9	85	2.983710407	0.003095196	0.935394564	K05730:VAV1|K06470:CD28|K04415:MAP3K8|K04409:PAK1,PAK1,PAK1,PAK1,PAK1|K05735:PAK6,PAK6,PAK6|K07364:TEC,TEC|K05872:NFKBIE|K07367:942369e8-1dd2-4321-9c0e-f5e2f3b9c384,942369e8-1dd2-4321-9c0e-f5e2f3b9c384|K18052:PRKCQ	https://www.kegg.jp/kegg-bin/show_pathway?ko04660/K05730%09red/K06470%09red/K04415%09red/K04409%09red/K05735%09red/K07364%09red/K05872%09red/K07367%09red/K18052%09red/
Protein digestion and absorption	KEGG PATHWAY	ko04974	7	56	3.522435897	0.003476839	0.167099583	K05612:4101b97c-6f5f-4cd9-b366-b96b9d3f7034,4101b97c-6f5f-4cd9-b366-b96b9d3f7034|K01389:MME|K07603:COL17A1,COL17A1,COL17A1|K01540:ATP1B4|K14210:SLC3A1|K06237:COL4A4,COL4A4|K08131:COL9A1,COL9A1,COL9A1,COL9A1	https://www.kegg.jp/kegg-bin/show_pathway?ko04974/K05612%09red/K01389%09red/K07603%09red/K01540%09red/K14210%09red/K06237%09red/K08131%09red/
NF-kappa B signaling pathway	KEGG PATHWAY	ko04064	9	87	2.915119363	0.003624461	0.912983471	K11859:TNFAIP3,TNFAIP3|K04729:d9dc55ca-e03b-4115-bd84-a5fe7ddccf3a,d9dc55ca-e03b-4115-bd84-a5fe7ddccf3a|K04733:IRAK4|K04403:TAB1|K04724:CFLAR,CFLAR,CFLAR|K07367:942369e8-1dd2-4321-9c0e-f5e2f3b9c384,942369e8-1dd2-4321-9c0e-f5e2f3b9c384|K05855:SYK|K18052:PRKCQ|K16065:PIAS4	https://www.kegg.jp/kegg-bin/show_pathway?ko04064/K11859%09red/K04729%09red/K04733%09red/K04403%09red/K04724%09red/K07367%09red/K05855%09red/K18052%09red/K16065%09red/
Platelet activation	KEGG PATHWAY	ko04611	9	87	2.915119363	0.003624461	0.275505122	K08043:ADCY3|K03900:VWF|K08048:7cfef49c-b7a6-4ae4-94a1-cd41a48c861a,7cfef49c-b7a6-4ae4-94a1-cd41a48c861a|K04959:ITPR2,ITPR2|K06493:ITGB3|K16342:PLA2G4F|K05855:SYK|K12319:GUCY1B1|K04630:GNAI2	https://www.kegg.jp/kegg-bin/show_pathway?ko04611/K08043%09red/K03900%09red/K08048%09red/K04959%09red/K06493%09red/K16342%09red/K05855%09red/K12319%09red/K04630%09red/
Progesterone-mediated oocyte maturation	KEGG PATHWAY	ko04914	7	59	3.343328987	0.004671326	0.823580515	K08043:ADCY3|K05459:IGF1|K08048:7cfef49c-b7a6-4ae4-94a1-cd41a48c861a,7cfef49c-b7a6-4ae4-94a1-cd41a48c861a|K03352:ANAPC5|K03353:CDC16|K04630:GNAI2|K04373:RPS6KA1	https://www.kegg.jp/kegg-bin/show_pathway?ko04914/K08043%09red/K05459%09red/K08048%09red/K03352%09red/K03353%09red/K04630%09red/K04373%09red/
Systemic lupus erythematosus	KEGG PATHWAY	ko05322	6	45	3.757264957	0.004851968	0.146833465	K06470:CD28|K11251:LOC101794184|K11253:LOC101798542|K05209:GRIN2A,GRIN2A|K01331:C1S|K05412:CD80	https://www.kegg.jp/kegg-bin/show_pathway?ko05322/K06470%09red/K11251%09red/K11253%09red/K05209%09red/K01331%09red/K05412%09red/
Cardiac muscle contraction	KEGG PATHWAY	ko04260	7	60	3.287606838	0.00513113	0.732200782	K04851:CACNA1D|K04962:RYR2,RYR2|K04858:CACNA2D1|K04859:LOC113845023|K04868:CACNG3|K01540:ATP1B4|K02264:LOC101795772	https://www.kegg.jp/kegg-bin/show_pathway?ko04260/K04851%09red/K04962%09red/K04858%09red/K04859%09red/K04868%09red/K01540%09red/K02264%09red/
Glycerophospholipid metabolism	KEGG PATHWAY	ko00564	10	109	2.585274053	0.005289759	0.64053869	K00649:GNPAT,GNPAT|K13523:AGPAT4|K00894:ETNK1|K00650:LCAT,LCAT|K00981:CDS1|K16342:PLA2G4F|K01047:PLA2G3,PLA2G12A,PLA2G12A|K00901:DGKI|K13510:LPCAT2,LPCAT2,LPCAT1|K13509:AGPAT2	https://www.kegg.jp/kegg-bin/show_pathway?ko00564/K00649%09red/K13523%09red/K00894%09red/K00650%09red/K00981%09red/K16342%09red/K01047%09red/K00901%09red/K13510%09red/K13509%09red/
PPAR signaling pathway	KEGG PATHWAY	ko03320	7	61	3.233711644	0.005624121	0.050424066	K08761:PLTP|K15013:ACSBG2|K00232:d538aa3b-7335-42f1-ab4d-70e92a6ad742,d538aa3b-7335-42f1-ab4d-70e92a6ad742|K08757:APOA1|K17284:PLIN2|K01897:ACSL1,ACSL1|K07296:32f1b8b5-058d-423f-8980-7d98c545c151,32f1b8b5-058d-423f-8980-7d98c545c151	https://www.kegg.jp/kegg-bin/show_pathway?ko03320/K08761%09red/K15013%09red/K00232%09red/K08757%09red/K17284%09red/K01897%09red/K07296%09red/
Phagosome	KEGG PATHWAY	ko04145	9	95	2.669635628	0.006485642	0.868949831	K09481:SEC61B|K10956:SEC61A2|K04659:THBS4|K07374:LOC101795602|K07375:TUBB1,TUBB1|K06493:ITGB3|K00914:PIK3C3|K02149:ATP6V1D,ATP6V1D|K13240:NOS1	https://www.kegg.jp/kegg-bin/show_pathway?ko04145/K09481%09red/K10956%09red/K04659%09red/K07374%09red/K07375%09red/K06493%09red/K00914%09red/K02149%09red/K13240%09red/
Ras signaling pathway	KEGG PATHWAY	ko04014	13	167	2.193612774	0.006501757	0.007936933	K04352:RASA1|K04549:GNGT2|K18497:FGF2|K04409:PAK1,PAK1,PAK1,PAK1,PAK1|K05735:PAK6,PAK6,PAK6|K05093:FGFR2|K05459:IGF1|K04358:FGF14,FGF5,FGF6,FGF4|K05209:GRIN2A,GRIN2A|K16342:PLA2G4F|K01047:PLA2G3,PLA2G12A,PLA2G12A|K05467:ANGPT4|K05103:EPHA2	https://www.kegg.jp/kegg-bin/show_pathway?ko04014/K04352%09red/K04549%09red/K18497%09red/K04409%09red/K05735%09red/K05093%09red/K05459%09red/K04358%09red/K05209%09red/K16342%09red/K01047%09red/K05467%09red/K05103%09red/
HTLV-I infection	KEGG PATHWAY	ko05166	15	206	2.051904406	0.006650096	0.081681694	K04685:LOC113840388|K08043:ADCY3|K00182:WNT2B,WNT2B|K03353:CDC16|K00312:WNT3,WNT3,WNT3A,WNT3A|K08048:7cfef49c-b7a6-4ae4-94a1-cd41a48c861a,7cfef49c-b7a6-4ae4-94a1-cd41a48c861a|K01064:WNT9B|K04374:ATF4|K03352:ANAPC5|K11224:LOC101790203|K09420:MYB|K00445:WNT6|K13377:TGFB3|K01357:WNT10A,WNT10A,WNT10A|K00572:WNT7A,WNT7A,WNT7A,WNT7A,WNT7B,WNT7B,WNT7B,WNT7B	https://www.kegg.jp/kegg-bin/show_pathway?ko05166/K04685%09red/K08043%09red/K00182%09red/K03353%09red/K00312%09red/K08048%09red/K01064%09red/K04374%09red/K03352%09red/K11224%09red/K09420%09red/K00445%09red/K13377%09red/K01357%09red/K00572%09red/
Salivary secretion	KEGG PATHWAY	ko04970	7	63	3.131054131	0.006715399	0.848535321	K08043:ADCY3|K04975:LOC101797054|K08048:7cfef49c-b7a6-4ae4-94a1-cd41a48c861a,7cfef49c-b7a6-4ae4-94a1-cd41a48c861a|K04959:ITPR2,ITPR2|K01540:ATP1B4|K12319:GUCY1B1|K13240:NOS1	https://www.kegg.jp/kegg-bin/show_pathway?ko04970/K08043%09red/K04975%09red/K08048%09red/K04959%09red/K01540%09red/K12319%09red/K13240%09red/
Gastric acid secretion	KEGG PATHWAY	ko04971	6	49	3.450549451	0.007399544	0.655027255	K08043:ADCY3|K08048:7cfef49c-b7a6-4ae4-94a1-cd41a48c861a,7cfef49c-b7a6-4ae4-94a1-cd41a48c861a|K04959:ITPR2,ITPR2|K01540:ATP1B4|K04630:GNAI2|K05008:KCNJ15,KCNJ15,KCNJ15	https://www.kegg.jp/kegg-bin/show_pathway?ko04971/K08043%09red/K08048%09red/K04959%09red/K01540%09red/K04630%09red/K05008%09red/
Regulation of actin cytoskeleton	KEGG PATHWAY	ko04810	12	151	2.239429445	0.007474756	0.914679357	K05730:VAV1|K18497:FGF2|K04409:PAK1,PAK1,PAK1,PAK1,PAK1|K06525:ITGB4|K05093:FGFR2|K04358:FGF14,FGF5,FGF6,FGF4|K06493:ITGB3|K05735:PAK6,PAK6,PAK6|K06587:ITGA11,ITGA11|K05764:TMSB4X|K05767:IQGAP3,IQGAP3|K06589:ITGB6	https://www.kegg.jp/kegg-bin/show_pathway?ko04810/K05730%09red/K18497%09red/K04409%09red/K06525%09red/K05093%09red/K04358%09red/K06493%09red/K05735%09red/K06587%09red/K05764%09red/K05767%09red/K06589%09red/
cGMP-PKG signaling pathway	KEGG PATHWAY	ko04022	10	117	2.408503178	0.008631261	0.070984434	K08043:ADCY3|K04851:CACNA1D|K08048:7cfef49c-b7a6-4ae4-94a1-cd41a48c861a,7cfef49c-b7a6-4ae4-94a1-cd41a48c861a|K04959:ITPR2,ITPR2|K04374:ATF4|K01540:ATP1B4|K12319:GUCY1B1|K04630:GNAI2|K04213:OPRD1,OPRD1|K04635:bb37c617-9fbc-4d71-8f31-304ff56a12bd,bb37c617-9fbc-4d71-8f31-304ff56a12bd	https://www.kegg.jp/kegg-bin/show_pathway?ko04022/K08043%09red/K04851%09red/K08048%09red/K04959%09red/K04374%09red/K01540%09red/K12319%09red/K04630%09red/K04213%09red/K04635%09red/
Pancreatic secretion	KEGG PATHWAY	ko04972	7	67	2.944125526	0.009359414	0.179990127	K08043:ADCY3|K04962:RYR2,RYR2|K08048:7cfef49c-b7a6-4ae4-94a1-cd41a48c861a,7cfef49c-b7a6-4ae4-94a1-cd41a48c861a|K04959:ITPR2,ITPR2|K01540:ATP1B4|K01047:PLA2G3,PLA2G12A,PLA2G12A|K04588:SCTR	https://www.kegg.jp/kegg-bin/show_pathway?ko04972/K08043%09red/K04962%09red/K08048%09red/K04959%09red/K01540%09red/K01047%09red/K04588%09red/
Type II diabetes mellitus	KEGG PATHWAY	ko04930	5	37	3.808038808	0.009384889	0.913482884	K04696:cf67d02f-9fdb-4d82-b39b-61991c5d8f4a,cf67d02f-9fdb-4d82-b39b-61991c5d8f4a|K07296:32f1b8b5-058d-423f-8980-7d98c545c151,32f1b8b5-058d-423f-8980-7d98c545c151|K04852:e414c170-6eaf-4ed6-9b93-bc8345118f1f|K04849:LOC101794161|K04851:CACNA1D	https://www.kegg.jp/kegg-bin/show_pathway?ko04930/K04696%09red/K07296%09red/K04852%09red/K04849%09red/K04851%09red/
Rap1 signaling pathway	KEGG PATHWAY	ko04015	12	156	2.16765286	0.009583906	0.823580515	K08043:ADCY3|K08048:7cfef49c-b7a6-4ae4-94a1-cd41a48c861a,7cfef49c-b7a6-4ae4-94a1-cd41a48c861a|K18497:FGF2|K05093:FGFR2|K05459:IGF1|K04358:FGF14,FGF5,FGF6,FGF4|K06493:ITGB3|K05209:GRIN2A,GRIN2A|K04630:GNAI2|K08390:LPAR5,LPAR5,LPAR5|K05467:ANGPT4|K05103:EPHA2	https://www.kegg.jp/kegg-bin/show_pathway?ko04015/K08043%09red/K08048%09red/K18497%09red/K05093%09red/K05459%09red/K04358%09red/K06493%09red/K05209%09red/K04630%09red/K08390%09red/K05467%09red/K05103%09red/
Cocaine addiction	KEGG PATHWAY	ko05030	5	38	3.70782726	0.010500012	0.008032913	K04630:GNAI2|K00274:LOC101792808,LOC101792808,LOC101792808|K04144:DRD1|K04374:ATF4|K05209:GRIN2A,GRIN2A	https://www.kegg.jp/kegg-bin/show_pathway?ko05030/K04630%09red/K00274%09red/K04144%09red/K04374%09red/K05209%09red/
Parkinson's disease	KEGG PATHWAY	ko05012	10	122	2.309794031	0.011422204	0.21414472	K05688:PINK1|K03878:ND1|K03943:NDUFV2|K03952:NDUFA8|K04528:SNCA|K02128:ATP5MC3|K04630:GNAI2|K03936:NDUFS3|K04144:DRD1|K02264:LOC101795772	https://www.kegg.jp/kegg-bin/show_pathway?ko05012/K05688%09red/K03878%09red/K03943%09red/K03952%09red/K04528%09red/K02128%09red/K04630%09red/K03936%09red/K04144%09red/K02264%09red/
Alzheimer's disease	KEGG PATHWAY	ko05010	11	141	2.198399709	0.011637366	0.406477265	K04851:CACNA1D|K03943:NDUFV2|K01389:MME|K04959:ITPR2,ITPR2|K03952:NDUFA8|K05209:GRIN2A,GRIN2A|K04528:SNCA|K02128:ATP5MC3|K03936:NDUFS3|K13240:NOS1|K02264:LOC101795772	https://www.kegg.jp/kegg-bin/show_pathway?ko05010/K04851%09red/K03943%09red/K01389%09red/K04959%09red/K03952%09red/K05209%09red/K04528%09red/K02128%09red/K03936%09red/K13240%09red/K02264%09red/
Protein export	KEGG PATHWAY	ko03060	5	39	3.612754767	0.011702514	0.030516062	K03104:SRP14|K09648:IMMP2L|K03108:SRP72|K10956:SEC61A2|K09481:SEC61B	https://www.kegg.jp/kegg-bin/show_pathway?ko03060/K03104%09red/K09648%09red/K03108%09red/K10956%09red/K09481%09red/
Synaptic vesicle cycle	KEGG PATHWAY	ko04721	5	40	3.522435897	0.012995337	0.196591599	K02149:ATP6V1D,ATP6V1D|K18211:SNAP25|K15290:SYT1|K04849:LOC101794161|K01528:LOC101801487,LOC101801487,LOC113844324	https://www.kegg.jp/kegg-bin/show_pathway?ko04721/K02149%09red/K18211%09red/K15290%09red/K04849%09red/K01528%09red/
Taste transduction	KEGG PATHWAY	ko04742	5	40	3.522435897	0.012995337	0.488449141	K05175:GABRA1,GABRA5,GABRA4,GABRA2|K04615:GABBR2,GABBR2|K08048:7cfef49c-b7a6-4ae4-94a1-cd41a48c861a,7cfef49c-b7a6-4ae4-94a1-cd41a48c861a|K04153:HTR1F,HTR1F|K04824:SCNN1A	https://www.kegg.jp/kegg-bin/show_pathway?ko04742/K05175%09red/K04615%09red/K08048%09red/K04153%09red/K04824%09red/
Prolactin signaling pathway	KEGG PATHWAY	ko04917	6	57	2.966261808	0.015168501	0.399008597	K04696:cf67d02f-9fdb-4d82-b39b-61991c5d8f4a,cf67d02f-9fdb-4d82-b39b-61991c5d8f4a|K17101:ELF5|K08551:ESR2|K08550:97717df5-85c9-409c-b480-491de14099c4|K11224:LOC101790203|K04248:LOC101803098	https://www.kegg.jp/kegg-bin/show_pathway?ko04917/K04696%09red/K17101%09red/K08551%09red/K08550%09red/K11224%09red/K04248%09red/
Long-term potentiation	KEGG PATHWAY	ko04720	5	43	3.276684556	0.017443274	0.176236677	K04373:RPS6KA1|K08048:7cfef49c-b7a6-4ae4-94a1-cd41a48c861a,7cfef49c-b7a6-4ae4-94a1-cd41a48c861a|K04959:ITPR2,ITPR2|K04374:ATF4|K05209:GRIN2A,GRIN2A	https://www.kegg.jp/kegg-bin/show_pathway?ko04720/K04373%09red/K08048%09red/K04959%09red/K04374%09red/K05209%09red/
Oocyte meiosis	KEGG PATHWAY	ko04114	7	76	2.595479082	0.017971265	0.643751313	K08043:ADCY3|K05459:IGF1|K08048:7cfef49c-b7a6-4ae4-94a1-cd41a48c861a,7cfef49c-b7a6-4ae4-94a1-cd41a48c861a|K04959:ITPR2,ITPR2|K03352:ANAPC5|K03353:CDC16|K04373:RPS6KA1	https://www.kegg.jp/kegg-bin/show_pathway?ko04114/K08043%09red/K05459%09red/K08048%09red/K04959%09red/K03352%09red/K03353%09red/K04373%09red/
Ether lipid metabolism	KEGG PATHWAY	ko00565	4	29	3.886825818	0.018383026	0.830201689	K13510:LPCAT2,LPCAT2,LPCAT1|K01047:PLA2G3,PLA2G12A,PLA2G12A|K04628:LOC101794817|K16342:PLA2G4F	https://www.kegg.jp/kegg-bin/show_pathway?ko00565/K13510%09red/K01047%09red/K04628%09red/K16342%09red/
Amphetamine addiction	KEGG PATHWAY	ko05031	5	45	3.131054131	0.020908283	0.913482884	K00274:LOC101792808,LOC101792808,LOC101792808|K04851:CACNA1D|K04144:DRD1|K04374:ATF4|K05209:GRIN2A,GRIN2A	https://www.kegg.jp/kegg-bin/show_pathway?ko05031/K00274%09red/K04851%09red/K04144%09red/K04374%09red/K05209%09red/
Endocytosis	KEGG PATHWAY	ko04144	12	177	1.910473707	0.023834248	0.955831516	K18465:WASHC4|K11247:SH3GL3|K12197:CHMP1A,CHMP1A|K18440:ARAP2,ARAP2,ARAP2|K05093:FGFR2|K09526:DNAJC6|K12200:PDCD6IP|K12493:ARFGAP3|K12562:AMPH|K13377:TGFB3|K12491:LOC113844143|K01528:LOC101801487,LOC101801487,LOC113844324	https://www.kegg.jp/kegg-bin/show_pathway?ko04144/K18465%09red/K11247%09red/K12197%09red/K18440%09red/K05093%09red/K09526%09red/K12200%09red/K12493%09red/K12562%09red/K13377%09red/K12491%09red/K01528%09red/
Amoebiasis	KEGG PATHWAY	ko05146	7	81	2.435264324	0.024627839	0.670214511	K13963:LOC106018098|K04635:bb37c617-9fbc-4d71-8f31-304ff56a12bd,bb37c617-9fbc-4d71-8f31-304ff56a12bd|K13377:TGFB3|K06247:LAMC3,LAMC3|K06245:LAMB4|K06237:COL4A4,COL4A4|K04636:LOC101793706	https://www.kegg.jp/kegg-bin/show_pathway?ko05146/K13963%09red/K04635%09red/K13377%09red/K06247%09red/K06245%09red/K06237%09red/K04636%09red/
Chagas disease (American trypanosomiasis)	KEGG PATHWAY	ko05142	7	82	2.405565979	0.026137689	0.913482884	K04729:d9dc55ca-e03b-4115-bd84-a5fe7ddccf3a,d9dc55ca-e03b-4115-bd84-a5fe7ddccf3a|K04733:IRAK4|K04724:CFLAR,CFLAR,CFLAR|K04630:GNAI2|K13377:TGFB3|K04635:bb37c617-9fbc-4d71-8f31-304ff56a12bd,bb37c617-9fbc-4d71-8f31-304ff56a12bd|K04636:LOC101793706	https://www.kegg.jp/kegg-bin/show_pathway?ko05142/K04729%09red/K04733%09red/K04724%09red/K04630%09red/K13377%09red/K04635%09red/K04636%09red/
Thyroid hormone synthesis	KEGG PATHWAY	ko04918	5	49	2.875457875	0.029114979	0.859125524	K08043:ADCY3|K01540:ATP1B4|K08048:7cfef49c-b7a6-4ae4-94a1-cd41a48c861a,7cfef49c-b7a6-4ae4-94a1-cd41a48c861a|K04959:ITPR2,ITPR2|K04374:ATF4	https://www.kegg.jp/kegg-bin/show_pathway?ko04918/K08043%09red/K01540%09red/K08048%09red/K04959%09red/K04374%09red/
Wnt signaling pathway	KEGG PATHWAY	ko04310	8	103	2.188698033	0.029855314	0.000656788	K00182:WNT2B,WNT2B|K00312:WNT3,WNT3,WNT3A,WNT3A|K01064:WNT9B|K01357:WNT10A,WNT10A,WNT10A|K02166:SFRP1,SFRP1,SFRP1,SFRP1,SFRP1|K16834:SOST|K00445:WNT6|K00572:WNT7A,WNT7A,WNT7A,WNT7A,WNT7B,WNT7B,WNT7B,WNT7B	https://www.kegg.jp/kegg-bin/show_pathway?ko04310/K00182%09red/K00312%09red/K01064%09red/K01357%09red/K02166%09red/K16834%09red/K00445%09red/K00572%09red/
Synthesis and degradation of ketone bodies	KEGG PATHWAY	ko00072	2	8	7.044871795	0.030521555	0.739183644	K00019:BDH2|K01640:HMGCLL1	https://www.kegg.jp/kegg-bin/show_pathway?ko00072/K00019%09red/K01640%09red/
Valine, leucine and isoleucine degradation	KEGG PATHWAY	ko00280	6	69	2.45039019	0.035284977	0.015428582	K05606:MCEE|K09478:ACADSB|K00128:LOC113839590|K01966:PCCB|K01640:HMGCLL1|K09699:DBT	https://www.kegg.jp/kegg-bin/show_pathway?ko00280/K05606%09red/K09478%09red/K00128%09red/K01966%09red/K01640%09red/K09699%09red/
Cell cycle	KEGG PATHWAY	ko04110	8	107	2.106877546	0.036294233	0.167351509	K04685:LOC113840388|K16332:RBL2|K06644:SFN,SFN|K03352:ANAPC5|K03353:CDC16|K02542:LOC101801579|K13377:TGFB3|K02607:ORC5	https://www.kegg.jp/kegg-bin/show_pathway?ko04110/K04685%09red/K16332%09red/K06644%09red/K03352%09red/K03353%09red/K02542%09red/K13377%09red/K02607%09red/
Transcriptional misregulation in cancer	KEGG PATHWAY	ko05202	10	147	1.916971917	0.036442635	0.229562551	K15605:KLF3,KLF3|K06532:PROM1|K11253:LOC101798542|K05459:IGF1|K09431:ETV1|K08367:RUNX1|K10048:CEBPB|K15187:42355edd-3254-4090-b137-58f0aac24bed,MLLT3,MLLT3|K08527:f3999bf1-6315-4ebb-9e5e-9814b3ef63f7,f3999bf1-6315-4ebb-9e5e-9814b3ef63f7|K08821:CDK14,CDK14	https://www.kegg.jp/kegg-bin/show_pathway?ko05202/K15605%09red/K06532%09red/K11253%09red/K05459%09red/K09431%09red/K08367%09red/K10048%09red/K15187%09red/K08527%09red/K08821%09red/
Carbohydrate digestion and absorption	KEGG PATHWAY	ko04973	3	21	4.025641026	0.036708973	0.167099583	K01540:ATP1B4|K01084:G6PC|K04851:CACNA1D	https://www.kegg.jp/kegg-bin/show_pathway?ko04973/K01540%09red/K01084%09red/K04851%09red/
Carbon fixation in photosynthetic organisms	KEGG PATHWAY	ko00710	4	36	3.131054131	0.037606431	0.488449141	K00615:TKT|K01623:ALDOC|K03841:LOC101802994|K00927:PGK1	https://www.kegg.jp/kegg-bin/show_pathway?ko00710/K00615%09red/K01623%09red/K03841%09red/K00927%09red/
Phosphatidylinositol signaling system	KEGG PATHWAY	ko04070	5	53	2.658442187	0.039111407	0.128124235	K00914:PIK3C3|K00981:CDS1|K00923:PIK3C2B|K04959:ITPR2,ITPR2|K00901:DGKI	https://www.kegg.jp/kegg-bin/show_pathway?ko04070/K00914%09red/K00981%09red/K00923%09red/K04959%09red/K00901%09red/
Fatty acid degradation	KEGG PATHWAY	ko00071	5	53	2.658442187	0.039111407	0.955831516	K00128:LOC113839590|K15013:ACSBG2|K00232:d538aa3b-7335-42f1-ab4d-70e92a6ad742,d538aa3b-7335-42f1-ab4d-70e92a6ad742|K09478:ACADSB|K01897:ACSL1,ACSL1	https://www.kegg.jp/kegg-bin/show_pathway?ko00071/K00128%09red/K15013%09red/K00232%09red/K09478%09red/K01897%09red/
Measles	KEGG PATHWAY	ko05162	8	109	2.068219243	0.039840077	0.687941555	K11859:TNFAIP3,TNFAIP3|K04729:d9dc55ca-e03b-4115-bd84-a5fe7ddccf3a,d9dc55ca-e03b-4115-bd84-a5fe7ddccf3a|K06470:CD28|K04733:IRAK4|K11224:LOC101790203|K12648:MAVS|K18052:PRKCQ|K12647:IFIH1,IFIH1	https://www.kegg.jp/kegg-bin/show_pathway?ko05162/K11859%09red/K04729%09red/K06470%09red/K04733%09red/K11224%09red/K12648%09red/K18052%09red/K12647%09red/
Intestinal immune network for IgA production	KEGG PATHWAY	ko04672	4	37	3.046431046	0.041027224	0.670214511	K05150:TNFRSF13B|K06470:CD28|K06710:ICOSLG,ICOSLG|K05412:CD80	https://www.kegg.jp/kegg-bin/show_pathway?ko04672/K05150%09red/K06470%09red/K06710%09red/K05412%09red/
Renin-angiotensin system	KEGG PATHWAY	ko04614	3	22	3.842657343	0.041419307	0.903228248	K01389:MME|K04303:LOC101796197|K01257:LNPEP	https://www.kegg.jp/kegg-bin/show_pathway?ko04614/K01389%09red/K04303%09red/K01257%09red/
Fanconi anemia pathway	KEGG PATHWAY	ko03460	5	54	2.609211776	0.041899131	0.014633717	K10848:LOC113841145|K10890:FANCC|K03511:POLK,POLK|K10606:FANCL|K10889:FANCB	https://www.kegg.jp/kegg-bin/show_pathway?ko03460/K10848%09red/K10890%09red/K03511%09red/K10606%09red/K10889%09red/
Glucagon signaling pathway	KEGG PATHWAY	ko04922	5	55	2.561771562	0.04480388	0.920143075	K04959:ITPR2,ITPR2|K04374:ATF4|K01084:G6PC|K04583:GCGR|K00688:PYGB	https://www.kegg.jp/kegg-bin/show_pathway?ko04922/K04959%09red/K04374%09red/K01084%09red/K04583%09red/K00688%09red/
alpha-Linolenic acid metabolism	KEGG PATHWAY	ko00592	3	23	3.675585284	0.046417853	0.000884963	K16342:PLA2G4F|K00232:d538aa3b-7335-42f1-ab4d-70e92a6ad742,d538aa3b-7335-42f1-ab4d-70e92a6ad742|K01047:PLA2G3,PLA2G12A,PLA2G12A	https://www.kegg.jp/kegg-bin/show_pathway?ko00592/K16342%09red/K00232%09red/K01047%09red/
Hepatitis B	KEGG PATHWAY	ko05161	8	113	1.995007942	0.04760812	8.43E-05	K04729:d9dc55ca-e03b-4115-bd84-a5fe7ddccf3a,d9dc55ca-e03b-4115-bd84-a5fe7ddccf3a|K05871:PTK2B|K04374:ATF4|K11224:LOC101790203|K12648:MAVS|K06255:6eedac56-73df-4aae-bd2a-22449de0b991,6eedac56-73df-4aae-bd2a-22449de0b991|K13377:TGFB3|K12647:IFIH1,IFIH1	https://www.kegg.jp/kegg-bin/show_pathway?ko05161/K04729%09red/K05871%09red/K04374%09red/K11224%09red/K12648%09red/K06255%09red/K13377%09red/K12647%09red/
Glycine, serine and threonine metabolism	KEGG PATHWAY	ko00260	7	94	2.09847245	0.049341316	0.913482884	K00274:LOC101792808,LOC101792808,LOC101792808|K00276:ddb5325f-dbcd-4e14-853b-4d16b4b39f0a,ddb5325f-dbcd-4e14-853b-4d16b4b39f0a|K00315:DMGDH,DMGDH,c46bd0c3-f507-4d22-8b5d-6203d336e3b1|K00314:SARDH|K00643:ALAS1|K00831:PSAT1|K15789:LOC101794341	https://www.kegg.jp/kegg-bin/show_pathway?ko00260/K00274%09red/K00276%09red/K00315%09red/K00314%09red/K00643%09red/K00831%09red/K15789%09red/
Toxoplasmosis	KEGG PATHWAY	ko05145	7	94	2.09847245	0.049341316	3.99E-05	K04729:d9dc55ca-e03b-4115-bd84-a5fe7ddccf3a,d9dc55ca-e03b-4115-bd84-a5fe7ddccf3a|K04733:IRAK4|K04403:TAB1|K06247:LAMC3,LAMC3|K04630:GNAI2|K06245:LAMB4|K13377:TGFB3	https://www.kegg.jp/kegg-bin/show_pathway?ko05145/K04729%09red/K04733%09red/K04403%09red/K06247%09red/K04630%09red/K06245%09red/K13377%09red/
