# Supplementary material for: Profiling Analysis of N6-Methyladenosine mRNA Methylation Reveals Differential m6A Patterns during the Embryonic Skeletal Muscle Development of Ducks
Source: Animals (Basel). 2022 Sep 28;12(19):2593. doi: 10.3390/ani12192593 (PMC9559603; doi:10.3390/ani12192593)
Supplement: Supplementary file 1 [file animals-12-02593-s001.zip › Table S9.xlsx]

## Sheet: Sheet1
Chr	Start	End	Name	Length	Strand	logFC	Pvalue	FDR	Treat|Control	T1_IP	T2_IP	T3_IP	T1_Input	T2_Input	T3_Input	C1_IP	C2_IP	C3_IP	C1_Input	C2_Input	C3_Input
NC_040055.1	16460970	16461151	peak_16782	182	-	-12.2714	0	0	NA|peak_11432	0	0	0	0	0	0	22	12	8	5	5	0
NC_040058.1	12502511	12502662	peak_1408	152	+	-11.3525	0	0	NA|peak_12641	0	0	0	3	0	2	27	48	25	12	22	11
NC_040051.1	16597985	16598076	peak_3158	92	+	11.7165	0	0	peak_8271|NA	4	7	7	0	4	2	0	0	0	0	1	1
NC_040056.1	16211859	16211950	peak_496	92	+	-11.0751	0	0	NA|peak_11676	0	0	0	0	0	1	10	23	11	15	3	6
NC_040046.1	107244608	107244699	peak_11280	92	+	-11.6158	0	0	NA|peak_578	0	0	0	13	0	6	12	23	13	10	4	4
NC_040052.1	33926580	33926641	peak_5682	62	+	-11.2007	0	0	NA|peak_9462	0	0	0	0	0	0	1	5	0	0	2	1
NC_040055.1	14011407	14011468	peak_16746	62	+	-12.1604	0	0	NA|peak_11203	0	0	0	0	20	5	11	11	13	2	3	4
NC_040046.1	193147944	193148005	peak_12817	62	-	-13.9024	0	0	NA|peak_2680	0	0	0	0	0	1	5	5	3	0	1	0
NC_040052.1	23317486	23317607	peak_5487	122	-	-7.38141	7.65246e-287	1.0839e-281	NA|peak_9692	1	0	0	0	0	0	13	16	5	2	2	0
NC_040065.1	9270751	9270812	peak_4750	62	-	6.65897	2.9251e-143	3.72882e-138	peak_15169|NA	15	27	3	1	0	0	1	10	20	31	20	19
NC_040047.1	66644080	66644199	peak_8780	120	+	-5.69574	1.37641e-83	1.5951e-78	NA|peak_3213	1	0	0	0	0	0	44	26	12	17	9	5
NC_040048.1	33079204	33079411	peak_14902	208	+	-5.25902	1.67073e-79	1.77483e-74	NA|peak_4840	7	6	0	5	10	3	9	7	10	1	0	0
NC_040067.1	7693047	7693706	peak_16333	660	-	-6.0289	1.27729e-71	1.2525e-66	NA|peak_16762	0	4	0	0	0	0	4	4	12	2	2	5
NC_040066.1	2165765	2165886	peak_5852	122	+	5.94464	7.76246e-68	7.06811e-63	peak_15288|NA	18	27	21	0	0	3	10	6	2	27	7	17
NC_040046.1	145448236	145448297	peak_12032	62	+	-6.05437	4.40692e-55	3.7452e-50	NA|peak_868	6	2	1	12	9	13	11	14	9	2	0	0
NC_040063.1	3249036	3249097	peak_18675	62	+	4.63525	4.59856e-55	3.66381e-50	peak_13876|NA	5	9	6	1	0	0	0	6	0	4	2	1
NC_040047.1	9128681	9128802	peak_8019	122	-	4.21765	2.18769e-39	1.64047e-34	peak_3560|NA	2	7	6	0	1	0	8	13	10	20	3	13
NC_040057.1	17572800	17572861	peak_19330	62	+	-7.06424	4.01696e-39	2.84483e-34	NA|peak_12353	0	237	1	2	0	0	0	344	285	210	218	0
NC_040070.1	5202596	5202657	peak_18447	62	+	5.48046	2.02583e-36	1.35919e-31	peak_16479|NA	24	47	25	1	4	3	11	13	19	49	54	43
NC_040046.1	175283070	175283160	peak_12633	91	+	4.55194	6.62726e-35	4.22411e-30	peak_1079|NA	2	8	7	0	0	0	1	0	0	0	0	0
NW_020865960.1	686	836	peak_4241	151	+	-5.86947	1.82147e-32	1.10569e-27	NA|peak_19280	0	4	0	0	0	0	6	4	10	2	0	0
NC_040047.1	59981665	59981756	peak_8706	92	+	4.25804	6.08271e-32	3.52457e-27	peak_3062|NA	1	7	4	0	0	1	7	0	0	4	0	7
NC_040067.1	7503028	7503089	peak_16324	62	+	4.62172	6.40573e-31	3.55036e-26	peak_15884|NA	1	4	6	0	1	0	2	0	1	1	1	4
NC_040047.1	121248919	121249068	peak_9314	150	-	4.20396	1.46904e-30	7.80287e-26	peak_4114|NA	5	10	8	0	2	0	45	35	47	67	35	86
NC_040046.1	130379909	130380000	peak_11796	92	-	-4.77879	6.3351e-28	3.23031e-23	NA|peak_2212	4	2	2	3	6	10	4	27	16	3	2	0
NC_040046.1	115444079	115444140	peak_11413	62	+	4.21298	1.50226e-26	7.36552e-22	peak_595,peak_593|NA	4	1	5	0	1	0	4	7	3	11	8	7
NC_040048.1	79678342	79678433	peak_15485	92	+	4.37002	2.60227e-25	1.22863e-20	peak_4900|NA	102	137	21	21	4	3	10	29	22	24	110	3
NC_040046.1	124381195	124381914	peak_11704	720	-	-4.54734	2.51273e-23	1.14398e-18	NA|peak_2166	0	3	3	8	6	0	16	6	2	3	0	0
NC_040046.1	179140828	179140979	peak_12671	152	+	3.58915	4.18482e-23	1.83955e-18	peak_1108|NA	12	11	6	3	0	0	41	19	26	63	26	14
NC_040059.1	15312973	15313214	peak_17306	242	+	4.86837	6.45413e-23	2.74251e-18	peak_12651|NA	6	19	69	0	4	8	4	3	6	29	6	4
NC_040060.1	5523716	5523955	peak_13286	240	-	-5.38127	1.04586e-22	4.30073e-18	NA|peak_13817	0	1	2	4	7	1	17	18	15	5	2	0
NC_040046.1	125089939	125090030	peak_11718	92	+	-4.0941	4.51993e-20	1.80058e-15	NA|peak_752	0	0	1	2	0	0	5	5	12	0	2	1
NC_040054.1	18426417	18426478	peak_14104	62	-	3.57957	4.57331e-18	1.76664e-13	peak_10527|NA	3	7	5	0	1	1	7	10	3	21	1	8
NC_040051.1	28483820	28483941	peak_3351	122	-	-3.39871	2.70663e-17	1.0148e-12	NA|peak_9030	8	11	5	6	11	17	11	11	7	1	0	3
NC_040046.1	63576995	63577055	peak_10763	61	-	-4.98184	6.39403e-17	2.32883e-12	NA|peak_1697	19	16	22	0	0	1	32	20	10	13	3	16
NC_040053.1	3821921	3822012	peak_2136	92	+	3.47391	1.76337e-16	6.24413e-12	peak_9426|NA	2	5	7	2	0	0	2	6	3	0	9	8
NC_040054.1	8163475	8163536	peak_13765	62	+	-3.81018	6.53325e-16	2.25092e-11	NA|peak_10589	0	0	2	0	2	2	4	10	10	3	1	0
NC_040075.1	69390206	69390296	peak_18212	91	-	-3.25243	3.44699e-15	1.15635e-10	NA|peak_19162	2	4	4	2	8	3	12	5	9	0	2	2
NC_040057.1	569354	569444	peak_19061	91	-	-4.3212	6.14188e-15	1.95737e-10	NA|peak_12390	1	3	0	0	0	0	18	9	9	3	3	1
NC_040058.1	11308422	11308543	peak_1380	122	-	-4.3212	6.14188e-15	1.95737e-10	NA|peak_12826	3	0	2	13	0	3	13	8	15	4	0	3
NW_020865403.1	33356	33417	peak_964	62	+	-4.7514	3.06403e-14	9.52666e-10	NA|peak_19222	1	0	2	2	6	4	16	14	16	1	2	7
NC_040046.1	193329654	193329835	peak_12818	182	-	-3.85639	1.83156e-13	5.55909e-09	NA|peak_2682	2	2	6	0	0	0	10	14	6	2	2	2
NC_040050.1	21289815	21289876	peak_6810	62	+	-3.80483	6.51387e-13	1.93109e-08	NA|peak_7467	2	0	2	3	6	1	6	10	3	1	2	1
NC_040064.1	184640	184850	peak_1721	211	-	-5.50399	7.0654e-13	2.04699e-08	NA|peak_15092	28	101	117	0	5	1	33	120	23	29	64	16
NC_040056.1	5960271	5960677	peak_182	407	-	-3.7239	4.33059e-12	1.22678e-07	NA|peak_11928	2	0	0	0	1	4	9	8	15	0	3	4
NC_040049.1	45392200	45392685	peak_20070	486	-	5.40638	5.27749e-12	1.46252e-07	peak_6684|NA	0	15	23	0	1	0	17	19	6	15	13	1
NC_040059.1	15312673	15312854	peak_17305	182	+	3.07688	1.44172e-11	3.91035e-07	peak_12650|NA	7	28	82	1	6	15	5	13	7	27	9	5
NC_040057.1	5470335	5470515	peak_19174	181	+	-3.89787	9.96291e-11	2.64592e-06	NA|peak_12288	0	2	0	0	4	2	13	14	27	5	5	4
NC_040046.1	89763541	89763632	peak_11122	92	+	-2.85636	1.38048e-10	3.59142e-06	NA|peak_505	3	8	0	4	7	4	8	10	12	1	5	0
NC_040069.1	975602	975723	peak_3962	122	+	-2.68643	5.33113e-10	1.35919e-05	NA|peak_16910	16	2	5	12	3	14	37	56	70	21	7	5
NC_040048.1	74879498	74879709	peak_15454	212	+	-4.27129	6.08126e-10	1.52004e-05	NA|peak_5117	0	2	4	0	0	0	30	39	27	15	0	14
NC_040048.1	48287737	48287828	peak_15092	92	+	-3.22504	1.00375e-09	2.46066e-05	NA|peak_4916	0	0	14	22	7	2	5	25	22	0	4	9
NC_040052.1	33251172	33251292	peak_5675	121	+	-2.83077	3.36857e-09	8.10217e-05	NA|peak_9460	1	8	4	4	14	1	6	7	4	2	2	0
NC_040046.1	152369036	152369217	peak_12256	182	+	-3.68632	4.46937e-09	0.000105508	NA|peak_992	2	6	1	0	0	0	18	24	14	12	2	3
NC_040048.1	21588740	21588801	peak_14703	62	+	2.81376	4.47419e-09	0.000103701	peak_4515|NA	7	22	11	1	4	4	13	19	20	35	17	26
NC_040046.1	177152634	177152785	peak_12646	152	+	2.56224	6.48408e-09	0.000147602	peak_1092|NA	6	21	11	5	3	0	4	1	2	4	2	3
NC_040049.1	53407253	53408500	peak_20224	1248	-	-2.66727	7.27593e-09	0.000162722	NA|peak_7021	2	4	6	4	11	2	14	39	39	10	10	1
NC_040069.1	975274	975424	peak_3961	151	+	-2.63811	1.27007e-08	0.000279147	NA|peak_16909	16	0	5	10	3	14	42	59	84	26	11	6
NC_040050.1	22615170	22615231	peak_6840	62	+	3.08156	1.42758e-08	0.000308446	peak_7152|NA	6	10	3	0	2	3	2	0	3	0	0	0
NC_040046.1	21142784	21142875	peak_10344	92	+	-2.52591	1.46362e-08	0.000310964	NA|peak_176	0	1	4	2	4	0	9	13	9	2	4	1
NC_040048.1	108760045	108760166	peak_15812	122	-	-2.7396	1.85813e-08	0.000388309	peak_5805|peak_6053	0	6	6	0	0	0	6	3	3	2	1	0
NC_040047.1	78094137	78094228	peak_8858	92	+	-4.83065	4.7261e-08	0.000971725	NA|peak_3249	0	2	1	3	16	0	181	106	74	75	27	43
NC_040060.1	4811907	4812028	peak_13264	122	-	-3.52582	5.4589e-08	0.00110458	NA|peak_13805	1	5	2	4	15	4	15	26	21	3	9	9
NC_040047.1	32180332	32180482	peak_8309	151	-	-3.9775	5.67798e-08	0.00113095	NA|peak_3842	3	2	0	0	0	0	13	18	18	3	6	9
NC_040059.1	15303854	15304035	peak_17303	182	+	4.83512	5.90852e-08	0.00115877	peak_12648|NA	6	10	67	8	16	8	0	2	2	26	3	0
NC_040063.1	969034	969183	peak_18601	150	+	-2.51523	1.14811e-07	0.00221753	NA|peak_14473	1	15	6	5	14	9	25	44	10	6	4	10
NC_040046.1	119974052	119974143	peak_11512	92	+	-3.15261	1.5373e-07	0.00288192	NA|peak_672	7	0	2	12	6	4	12	12	19	6	6	2
NC_040058.1	14126162	14126222	peak_1433	61	-	-3.15261	1.5373e-07	0.00288192	NA|peak_12839	0	2	0	3	2	0	11	12	8	3	3	4
NC_040075.1	76889326	76889416	peak_18252	91	-	-4.72552	1.78273e-07	0.00329357	NA|peak_19180	17	6	7	11	10	4	16	19	10	2	0	0
NC_040048.1	92984169	92984470	peak_15671	302	-	-4.72372	1.79652e-07	0.00327164	NA|peak_5981	1	4	0	0	0	0	122	122	110	66	39	50
NC_040063.1	1919697	1919758	peak_18648	62	+	3.14941	1.89043e-07	0.00339418	peak_13860|NA	21	2	9	1	0	0	14	26	16	0	4	11
NC_040066.1	6121622	6121683	peak_5934	62	-	-2.91086	2.07831e-07	0.00367968	NA|peak_16265	0	3	2	0	7	4	15	9	12	5	0	6
NC_040063.1	316104	316253	peak_18572	150	+	2.59611	2.1808e-07	0.00380825	peak_13832|NA	15	15	23	4	6	4	11	10	26	33	26	16
NC_040059.1	15308532	15308593	peak_17304	62	+	3.43659	2.33321e-07	0.00401933	peak_12649|NA	8	6	63	1	15	10	0	8	3	27	3	5
NW_020866459.1	4990	5050	peak_18546	61	-	3.88606	2.49711e-07	0.00424431	peak_18513|NA	6	13	8	1	0	0	8	7	6	0	5	5
NC_040052.1	23959885	23959976	peak_5509	92	-	-4.66886	3.47177e-07	0.00582329	NA|peak_9706	14	6	25	8	20	9	9	6	7	1	0	0
NC_040049.1	50415948	50416009	peak_20170	62	+	-3.39253	3.4908e-07	0.00577918	NA|peak_6486	1	0	0	0	2	1	8	10	12	7	0	4
NC_040049.1	6506530	6506653	peak_19489	124	+	-3.83064	3.87537e-07	0.00633359	NA|peak_6184,peak_6183	0	2	2	0	0	0	15	9	15	8	3	5
NC_040073.1	6393231	6393291	peak_3847	61	+	-4.67922	4.21878e-07	0.00680756	NA|peak_17964	59	57	68	0	0	8	104	111	80	90	31	88
NC_040046.1	135646646	135646797	peak_11855	152	-	3.83708	4.68762e-07	0.00746954	peak_2123|NA	2	8	16	0	1	0	31	30	9	33	2	3
NC_040048.1	75711996	75712057	peak_15464	62	+	-2.41567	5.80249e-07	0.00902053	NA|peak_5127	0	4	9	4	6	8	8	17	8	4	5	0
NC_040059.1	17702971	17703152	peak_17338	182	-	-2.41567	5.80249e-07	0.00902053	NA|peak_13430	8	6	0	9	6	4	15	10	8	1	1	7
NC_040046.1	107244996	107245206	peak_11281	211	+	-3.34522	6.44892e-07	0.00978676	NA|peak_579	2	2	2	13	0	6	38	49	46	13	26	11
NC_040054.1	2438445	2438536	peak_13694	92	-	-3.34522	6.44892e-07	0.00978676	NA|peak_10790	3	0	1	0	0	0	53	17	29	18	7	12
NC_040054.1	415741	415802	peak_13628	62	-	-2.83067	6.61026e-07	0.00979832	NA|peak_10760	6	0	6	22	0	2	13	5	25	0	0	14
NC_040047.1	89045565	89045745	peak_8924	181	-	-2.83067	6.61026e-07	0.00979832	NA|peak_4137	17	9	15	45	31	12	8	12	11	4	4	2
NC_040049.1	43580184	43581665	peak_20001	1482	+	-4.60822	6.79641e-07	0.00995846	peak_6154|peak_6416	3	8	9	0	0	0	12	23	18	9	12	4
NC_040057.1	10431485	10431546	peak_19217	62	-	-3.77816	7.32268e-07	0.0104885	NA|peak_12453	2	0	0	0	0	0	4	4	4	2	0	3
NC_040046.1	95219567	95219774	peak_11222	208	+	-3.77816	7.32268e-07	0.0104885	NA|peak_549	2	0	4	0	0	0	28	44	22	19	11	9
NC_040049.1	53783051	53783171	peak_20228	121	+	-2.78884	1.1735e-06	0.0166216	NA|peak_6510	0	1	0	0	0	2	20	17	14	3	6	8
NC_040050.1	20035431	20035492	peak_6764	62	+	3.73375	1.64215e-06	0.023004	peak_7115|NA	19	52	2	0	3	0	0	39	34	26	2	2
NC_040047.1	30713854	30713913	peak_8294	60	-	-2.97748	1.65361e-06	0.0226664	NA|peak_3832	1	2	0	1	1	5	8	15	20	8	0	8
NC_040049.1	31391628	31391778	peak_19840	151	+	-2.97748	1.65361e-06	0.0226664	NA|peak_6346	0	6	0	2	7	6	73	55	114	27	22	41
NC_040074.1	3614035	3614126	peak_1153	92	-	2.45522	1.88805e-06	0.0256046	peak_17471|NA	14	18	13	4	7	2	9	18	7	15	17	18
NC_040065.1	4687907	4687969	peak_4535	63	+	-2.56763	2.42428e-06	0.0325305	NA|peak_15394,peak_15398	3	59	4	49	51	15	102	133	24	49	4	31
NC_040046.1	83762803	83762926	peak_11074	124	-	-2.21096	2.92187e-06	0.0387991	NA|peak_1850,peak_1849	0	2	11	6	6	4	10	4	11	5	2	0
NC_040075.1	63825830	63825981	peak_18152	152	+	2.19957	3.50042e-06	0.0460024	peak_17868|NA	13	31	15	6	6	4	10	21	16	8	22	30
NC_040048.1	51692345	51692436	peak_15164	92	+	-2.70136	3.66175e-06	0.0476315	NA|peak_4973	5	4	4	9	15	3	19	24	21	2	11	10
NC_040064.1	3818250	3818310	peak_1902	61	-	-2.5258	4.20401e-06	0.0541327	NA|peak_15165	10	12	5	12	13	19	16	19	28	4	8	9
NC_040052.1	24309534	24309595	peak_5514	62	-	-2.17533	4.86921e-06	0.0620712	NA|peak_9709	9	20	13	19	22	7	12	17	27	9	4	3
NC_040047.1	39793670	39793850	peak_8426	181	-	-3.60821	4.87387e-06	0.0615154	NA|peak_3913,peak_3914	0	2	0	0	3	5	20	44	31	17	12	16
NC_040046.1	122510332	122511982	peak_11644	1651	+	-4.41555	4.94795e-06	0.0618382	NA|peak_724	1	0	0	0	6	0	32	39	25	20	17	14
NC_040075.1	27359936	27360027	peak_17752	92	-	3.62256	5.70018e-06	0.0705478	peak_18107|NA	3	3	16	1	0	0	3	3	2	4	0	0
NC_040048.1	15704448	15704509	peak_14537	62	-	3.62096	5.73577e-06	0.0703056	peak_5261|NA	6	28	7	12	2	4	5	3	0	5	6	21
NC_040060.1	3292804	3292985	peak_13197	182	-	2.47964	8.56133e-06	0.10394	peak_13172|peak_13779	187	3478	4158	258	229	2130	157	262	3084	2015	2169	2036
NC_040047.1	132577308	132577399	peak_9443	92	+	-3.54825	9.07604e-06	0.10915	peak_3397|peak_3537	4	17	15	8	5	4	10	25	25	0	0	3
NC_040048.1	37507922	37507982	peak_14959	61	-	-3.54681	9.1218e-06	0.108675	NA|peak_5682	0	0	2	7	1	0	1	5	31	18	0	0
NW_020865749.1	8856	9428	peak_1211	573	+	-2.43832	1.24963e-05	0.147499	NA|peak_19257	6	12	4	13	14	14	23	19	12	5	8	6
NC_040047.1	44843370	44843431	peak_8504	62	+	-2.60939	1.31744e-05	0.154076	NA|peak_3074	10	73	86	45	12	5	17	21	16	5	38	62
NC_040052.1	15413194	15413403	peak_5224	210	+	-2.1013	1.33586e-05	0.15481	peak_8804|peak_9199	10	15	28	11	23	31	41	66	64	18	11	23
NC_040049.1	10616699	10616760	peak_19535	62	-	2.18661	1.57635e-05	0.181035	peak_6429|NA	5	5	10	0	4	2	4	3	2	3	10	0
NC_040051.1	16883064	16883571	peak_3162	508	+	-3.48267	1.70236e-05	0.19376	NA|peak_8681	0	3	1	4	6	11	7	16	12	3	7	8
NC_040061.1	9487579	9487759	peak_20865	181	-	-2.06283	2.19824e-05	0.247986	NA|peak_14335	45	11	28	36	37	32	123	34	19	17	32	5
NC_040049.1	51514983	51515073	peak_20177	91	+	2.56208	2.27789e-05	0.254718	peak_6224|NA	8	21	11	3	11	1	4	7	1	8	11	5
NC_040046.1	53905516	53905607	peak_10634	92	-	-3.02469	2.40094e-05	0.266144	NA|peak_1629	4	10	5	0	4	2	6	9	6	0	0	1
NC_040059.1	12552044	12552135	peak_17186	92	+	2.39217	2.48353e-05	0.272924	peak_12589|NA	10	25	37	3	15	7	6	9	11	20	15	14
NC_040047.1	20281906	20282027	peak_8168	122	-	2.14707	2.60493e-05	0.283819	peak_3636|NA	6	13	13	4	4	2	5	29	21	18	27	34
NC_040046.1	123334660	123334721	peak_11664	62	+	-3.41555	3.16728e-05	0.342165	NA|peak_728	0	2	5	10	14	9	8	11	24	4	4	15
NC_040060.1	2377735	2377974	peak_13137	240	-	-2.50869	3.40789e-05	0.365065	NA|peak_13743	4	1	0	3	8	0	39	33	52	19	4	28
NC_040049.1	5614154	5614335	peak_19458	182	-	3.43798	3.6131e-05	0.383822	peak_6407|NA	2	8	10	0	0	1	1	11	17	11	2	2
NC_040072.1	1668516	1668697	peak_9776	182	-	-2.3452	3.65235e-05	0.384786	NA|peak_17687	0	1	2	3	0	2	41	61	38	32	18	3
NC_040048.1	24499533	24499594	peak_14756	62	-	-2.11075	3.72027e-05	0.388729	NA|peak_5604	6	9	7	12	7	9	18	32	15	10	5	7
NC_040055.1	7018728	7018818	peak_16583	91	-	-2.21591	3.74732e-05	0.388372	NA|peak_11323	14	21	27	20	50	24	37	87	78	33	23	17
NC_040062.1	441435	441556	peak_12996	122	+	-2.51316	3.92209e-05	0.403206	NA|peak_14418	213	489	253	195	135	44	107	148	122	185	320	322
NC_040047.1	37720483	37720604	peak_8409	122	-	4.22624	4.02802e-05	0.410784	peak_3733|NA	3	7	7	1	0	0	24	25	12	18	28	8
NC_040065.1	3307087	3307178	peak_4416	92	+	2.10641	4.28556e-05	0.433579	peak_14654|NA	8	17	18	12	1	1	3	13	16	7	25	12
NC_040046.1	111483611	111483672	peak_11366	62	-	-2.96184	4.36114e-05	0.437752	NA|peak_1985	1	4	3	3	20	0	8	8	4	0	2	8
NC_040047.1	116301551	116301702	peak_9239	152	+	-1.98264	5.87067e-05	0.584668	NA|peak_3428	6	3	4	0	11	4	23	23	30	7	5	13
NC_040058.1	782892	782952	peak_1259	61	+	2.67754	6.03301e-05	0.596178	peak_11999|NA	17	15	34	8	12	8	0	0	5	10	2	2
NC_040046.1	81625608	81625815	peak_11043	208	+	-2.29627	6.20126e-05	0.60809	NA|peak_471	22	17	31	3	47	79	33	100	45	22	19	30
NC_040046.1	66200790	66200910	peak_10810	121	+	-2.17011	6.26545e-05	0.609695	NA|peak_353	4	15	32	11	28	34	100	29	90	18	9	53
NC_040075.1	37213877	37213938	peak_17850	62	+	1.97713	6.71935e-05	0.648911	peak_17730|NA	2	7	7	2	3	0	11	15	18	23	16	12
NC_040048.1	19412274	19412335	peak_14633	62	+	-4.11183	6.78489e-05	0.650314	NA|peak_4697	3	0	6	0	0	0	3	7	5	0	1	0
NC_040047.1	116710756	116710817	peak_9246	62	+	-2.16976	7.15731e-05	0.680889	NA|peak_3432	0	299	281	0	205	1	545	2	0	2	464	408
NC_040047.1	90925058	90925328	peak_8937	271	-	-2.6082	9.27416e-05	0.875734	NA|peak_4147	0	0	3	5	2	0	145	131	102	60	60	61
NC_040073.1	1776316	1776526	peak_3550	211	+	-1.94081	9.52347e-05	0.892664	NA|peak_17798	2	0	2	1	0	4	15	19	19	9	7	2
NC_040048.1	16878466	16878556	peak_14606	91	-	-2.40176	0.00010127	0.94231	NA|peak_5546	2	0	18	0	23	15	60	48	56	26	28	17
NC_040070.1	71681	71772	peak_18295	92	+	2.12395	0.000118175	1.09164	peak_16407|NA	12	10	20	1	7	7	13	10	14	16	10	29
NC_040054.1	512264	512413	peak_13631	150	-	-3.30024	0.000121803	1.11706	NA|peak_10762	14	35	22	2	0	2	13	24	16	4	11	10
NC_040048.1	94506613	94506733	peak_15694	121	-	-4.02421	0.000130013	1.18383	NA|peak_5987	6	12	16	4	10	6	15	7	21	2	0	1
NC_040054.1	18128530	18128591	peak_14096	62	+	-2.83058	0.000140644	1.27155	NA|peak_10713	0	6	0	6	14	0	4	19	7	0	14	2
NC_040050.1	53825529	53825620	peak_7585	92	-	4.06554	0.000145608	1.30716	peak_8105,peak_8104|NA	5	6	4	1	0	0	5	6	0	1	4	2
NC_040051.1	26628000	26628150	peak_3331	151	+	4.06451	0.000146031	1.30179	peak_8361|NA	36	93	85	29	72	36	1	4	0	3	19	7
NC_040046.1	108333268	108333448	peak_11330	181	+	-1.97746	0.0001645	1.45625	NA|peak_600	230	35	55	23	258	168	16	161	164	8	6	112
NC_040050.1	15371218	15371337	peak_6679	120	+	-2.34517	0.000173264	1.52325	NA|peak_7398	14	5	9	15	25	20	100	38	63	38	19	35
NC_040074.1	240177	240387	peak_1089	211	-	1.97711	0.000185324	1.61812	peak_17441|NA	33	69	59	18	21	17	15	50	46	52	45	48
NC_040056.1	3512662	3512813	peak_147	152	+	-1.85334	0.000246616	2.13863	NA|peak_11514	0	0	5	2	0	4	77	69	62	27	32	15
NC_040046.1	149208839	149208929	peak_12136	91	+	-1.85333	0.000246623	2.12424	NA|peak_918	19	35	86	49	71	46	70	124	78	63	31	4
NC_040061.1	1588783	1588874	peak_20587	92	+	-2.02325	0.000283861	2.42858	NA|peak_13992	4	4	4	1	8	10	13	15	29	8	4	11
NC_040073.1	1776703	1776854	peak_3551	152	+	-2.28626	0.000294822	2.50553	NA|peak_17799	2	0	2	1	2	6	21	38	38	14	23	8
NC_040047.1	148217006	148217067	peak_9607	62	-	-3.11175	0.00036493	3.08081	NA|peak_4461	2	5	2	1	4	0	6	6	62	1	2	2
NC_040046.1	133688912	133696637	peak_11836	7726	-	-3.11066	0.000365958	3.06916	NA|peak_2233	1	0	0	2	2	1	6	8	6	6	4	3
NC_040046.1	149208690	149208751	peak_12135	62	+	1.80752	0.000393493	3.27851	peak_854|NA	20	34	92	49	71	47	74	117	87	63	34	5
NC_040056.1	16225690	16225811	peak_497	122	+	-1.88123	0.000431171	3.56912	NA|peak_11677	4	2	3	6	4	2	28	52	30	8	20	15
NC_040051.1	14836212	14836451	peak_3118	240	+	-1.97077	0.000464368	3.81911	NA|peak_8660	6	29	3	12	24	21	92	64	80	25	31	42
NC_040047.1	78037271	78037451	peak_8857	181	-	-2.41553	0.000486873	3.97853	NA|peak_4104	2	1	5	6	13	0	67	60	40	38	21	30
NC_040074.1	3851594	3851775	peak_1161	182	+	-2.08212	0.000488811	3.96893	NA|peak_18197	16	3	4	0	8	30	135	12	166	54	39	48
NC_040073.1	4253295	4253506	peak_3670	212	+	-2.22485	0.00049874	4.02391	NA|peak_17869	0	6	16	23	1	25	89	80	41	64	15	23
NC_040059.1	13696562	13696623	peak_17224	62	+	-1.76021	0.00062404	5.00319	NA|peak_13165	0	22	10	34	6	0	29	47	70	13	28	15
NC_040052.1	35791238	35791386	peak_5698	149	-	-3.02319	0.000667424	5.31757	NA|peak_9781	0	5	0	0	0	0	20	13	14	17	13	3
NC_040056.1	19308064	19308946	peak_658	883	-	-1.83059	0.000691716	5.40969	NA|peak_12161	20	22	9	32	6	31	41	38	38	5	5	37
NC_040046.1	26626444	26626505	peak_10440	62	+	-1.83059	0.000691716	5.40969	NA|peak_213	1	5	9	1	10	9	25	18	32	6	8	16
NC_040075.1	9826307	9826368	peak_17489	62	+	-1.83059	0.000691716	5.40969	NA|peak_18329	2	9	8	7	10	9	25	24	29	14	7	11
NC_040066.1	2157162	2157252	peak_5851	91	-	-3.06562	0.000731422	5.68533	NA|peak_16225	17	29	16	1	0	3	406	320	343	199	129	158
NC_040050.1	33296802	33296863	peak_7024	62	-	1.91631	0.000754903	5.83229	peak_7899|NA	19	45	29	73	10	55	153	191	152	106	13	97
NC_040060.1	12622764	12622915	peak_13525	152	-	1.83507	0.000762886	5.85846	peak_13324|NA	28	59	47	10	33	8	9	5	16	22	19	0
NC_040056.1	9608991	9610162	peak_271	1172	+	-2.02322	0.000806972	6.12323	NA|peak_11564	0	0	3	1	2	2	11	12	17	7	5	7
NC_040047.1	93441148	93441269	peak_8963	122	-	-2.02322	0.000806972	6.12323	NA|peak_4160	0	3	0	0	3	2	16	19	13	3	10	10
NC_040069.1	1691721	1691811	peak_4009	91	-	1.92462	0.000831236	6.27002	peak_16333|NA	15	25	16	9	5	9	16	14	8	17	19	26
NC_040049.1	16422276	16423233	peak_19651	958	+	-2.34513	0.000836473	6.27242	NA|peak_6270	2	16	2	8	38	10	59	71	61	31	29	46
NC_040053.1	32765626	32765717	peak_2779	92	+	2.03596	0.000887367	6.61514	peak_9724|NA	2	4	5	2	1	2	47	44	36	60	78	77
NC_040047.1	118375627	118375718	peak_9264	92	-	2.1787	0.000921008	6.826	peak_4096|NA	77	172	116	89	0	86	157	7	5	0	145	189
NC_040057.1	19876923	19877164	peak_19358	242	+	3.7852	0.000979419	7.21696	peak_11839|peak_12373	5	14	6	0	2	0	120	176	138	80	91	81
NC_040058.1	9329661	9329722	peak_1355	62	-	-3.78438	0.000981274	7.18907	NA|peak_12819	8	24	12	19	12	4	7	7	4	37	57	36
NC_040073.1	887032	887093	peak_3508	62	+	1.71129	0.000983357	7.16316	peak_17031|NA	50	16	16	56	7	36	32	84	78	20	15	41
NC_040064.1	3811869	3812199	peak_1901	331	-	-1.77812	0.00110247	7.98517	NA|peak_15164	10	7	13	14	8	17	31	28	32	15	8	15
NC_040074.1	3852222	3852343	peak_1163	122	+	-1.85972	0.00121907	8.77983	NA|peak_18199	16	2	5	1	7	29	133	13	171	52	38	52
NC_040050.1	45790818	45790939	peak_7454	122	+	-1.96181	0.00132328	9.42392	NA|peak_7783	4	31	12	20	35	24	36	37	63	20	21	25
NC_040047.1	147184806	147184880	peak_9594	75	-	-1.96181	0.00132328	9.42392	NA|peak_4457,peak_4456	0	3	0	5	0	0	13	21	27	2	12	16
NC_040047.1	20744622	20744832	peak_8171	211	-	1.87016	0.00133299	9.44033	peak_3639|NA	19	28	34	14	12	9	3	10	25	14	20	23
NC_040047.1	154424693	154426326	peak_9645	1634	+	-2.09359	0.00140009	9.86073	NA|peak_3612	4	0	7	13	8	0	12	27	29	19	14	3
NC_040050.1	40469456	40469517	peak_7362	62	+	-2.27222	0.0014236	9.9712	NA|peak_7733	6	20	15	4	2	4	8	5	4	0	0	1
NC_040066.1	8145185	8145276	peak_6038	92	-	-2.27112	0.00142773	9.94548	NA|peak_16316	0	5	0	10	2	0	10	6	4	4	4	4
NC_040072.1	4153368	4153429	peak_9892	62	+	-1.66066	0.00153916	10.6058	NA|peak_17608	30	39	6	30	40	23	36	39	38	9	17	20
NC_040067.1	2877429	2877550	peak_16135	122	-	-1.66066	0.00153916	10.6058	NA|peak_16656	2	4	0	0	4	3	10	5	5	1	3	4
NC_040052.1	29388424	29388635	peak_5624	212	-	1.66513	0.00167808	11.5009	peak_9337|NA	29	29	25	8	16	8	12	12	14	3	30	15
NC_040072.1	1665461	1665522	peak_9775	62	-	-3.60901	0.00169479	11.5533	NA|peak_17686	0	1	4	3	0	2	10	22	1	1	2	0
NC_040075.1	525082	525233	peak_17365	152	-	-3.60813	0.00169775	11.5119	NA|peak_18744,peak_18745	4	1	1	3	24	11	10	17	12	17	7	13
NC_040051.1	20868881	20869121	peak_3237	241	-	-1.72366	0.001745	11.7078	NA|peak_8981	24	12	20	35	21	18	151	109	89	62	36	56
NC_040065.1	4687221	4687371	peak_4534	151	+	1.72366	0.001745	11.7078	peak_14721,peak_14718|NA	13	73	29	56	70	21	111	160	75	62	20	68
NC_040047.1	25888171	25888262	peak_8259	92	-	-3.67836	0.00183549	12.2504	NA|peak_3818	24	16	55	4	0	4	14	24	26	38	2	6
NC_040047.1	44843489	44843550	peak_8505	62	+	-1.73196	0.00189863	12.6058	NA|peak_3075	6	81	85	48	17	6	26	26	30	5	42	67
NC_040075.1	14212014	14212164	peak_17565	151	+	-1.80082	0.00195474	12.9111	NA|peak_18365	0	2	37	30	0	27	27	51	14	23	20	0
NC_040054.1	17146233	17146443	peak_14076	211	+	1.81357	0.0021228	13.9489	peak_10246|NA	34	31	18	17	17	3	13	6	18	24	15	22
NC_040048.1	79685317	79685498	peak_15486	182	+	1.81356	0.00212281	13.8774	peak_4901|NA	65	56	67	34	23	28	31	70	36	55	125	21
NC_040060.1	5672663	5672753	peak_13292	91	+	2.8314	0.0021801	14.1792	peak_12948|NA	7	19	9	3	9	6	4	8	25	3	0	0
NC_040072.1	1668846	1670820	peak_9777	1975	-	-1.60818	0.00239203	15.4005	NA|peak_17688	0	3	8	3	6	4	44	69	39	27	16	20
NC_040065.1	4686918	4687043	peak_4533	126	+	-1.60818	0.00239203	15.4005	NA|peak_15393,peak_15397	33	108	47	81	93	44	228	258	184	104	59	116
NC_040046.1	86495756	86495817	peak_11091	62	-	-2.43909	0.00239309	15.3298	NA|peak_1854	0	5	4	0	2	1	3	8	3	0	0	1
NC_040060.1	5624046	5624137	peak_13288	92	-	-2.19311	0.00241967	15.4226	NA|peak_13818	1	0	4	8	6	0	10	8	8	3	11	2
NC_040047.1	123477234	123477295	peak_9335	62	+	1.6145	0.00259117	16.4335	peak_3344|NA	2	4	9	6	0	0	1	4	0	0	4	2
NC_040070.1	6803520	6803611	peak_18522	92	+	2.22497	0.00261668	16.5132	peak_16504|NA	11	83	27	28	38	6	1	2	0	3	0	4
NC_040049.1	69398564	69398714	peak_20442	151	-	1.6775	0.00296368	18.6109	peak_6854|peak_7130	611	1097	834	498	561	41	156	143	1269	811	628	697
NC_040046.1	185598929	185599020	peak_12722	92	-	1.73941	0.00311085	19.1575	peak_2503|NA	0	4	3	4	0	7	0	2	0	0	1	0
NC_040051.1	14487897	14487957	peak_3097	61	+	-1.73941	0.00311085	19.1575	NA|peak_8650	2	49	4	43	35	2	50	62	87	32	36	29
NC_040047.1	129212446	129212507	peak_9394	62	+	-1.73941	0.00311085	19.1575	NA|peak_3514	5	11	11	20	18	3	13	11	14	9	3	7
NC_040046.1	75380622	75380713	peak_10922	92	+	-1.73941	0.00311085	19.1575	NA|peak_407	3	9	2	7	9	6	16	21	14	9	7	9
NC_040050.1	22614331	22614452	peak_6839	122	+	-3.48332	0.00318944	19.5471	NA|peak_7482	8	16	10	11	9	7	12	10	9	2	1	0
NC_040046.1	139127505	139127626	peak_11897	122	-	-1.75466	0.00335571	20.4677	NA|peak_2267	11	4	2	4	0	4	5	11	4	13	4	14
NC_040046.1	182058091	182058242	peak_12699	152	+	3.56273	0.00342496	20.7907	peak_1116|NA	2	14	6	2	0	0	18	16	38	18	10	22
NC_040048.1	115268169	115268260	peak_15890	92	+	-1.83055	0.00348057	20.9289	NA|peak_5306	10	18	8	32	12	19	10	9	28	2	18	5
NC_040050.1	17253982	17254273	peak_6729	292	+	-1.83055	0.00348057	20.9289	NA|peak_7414	2	10	14	0	0	0	343	337	224	207	144	132
NC_040047.1	20991792	20991881	peak_8180	90	+	1.55373	0.00368968	21.979	peak_2816|NA	182	165	92	194	265	52	141	668	425	261	128	142
NC_040055.1	11116936	11116997	peak_16652	62	-	-1.55373	0.00368968	21.979	NA|peak_11357	13	50	26	28	34	49	75	60	67	35	6	48
NC_040047.1	49645206	49645297	peak_8588	92	-	1.85152	0.00374754	22.1169	peak_3817|NA	12	20	12	9	6	7	6	14	7	27	7	14
NC_040047.1	20800500	20802303	peak_8173	1804	-	1.85152	0.00374754	22.1169	peak_3641|NA	14	25	18	7	12	10	3	5	16	3	22	17
NC_040049.1	44797970	44798061	peak_20041	92	+	1.94919	0.0038183	22.4307	peak_6165|NA	327	183	128	423	616	381	263	456	62	18	404	49
NC_040051.1	12400732	12404147	peak_3029	3416	-	-2.72441	0.00390793	22.8519	NA|peak_8886	1	10	4	2	4	2	13	27	7	2	2	0
NC_040050.1	5689404	5695056	peak_6423	5653	+	-2.11064	0.00406922	23.6864	NA|peak_7243	27	11	6	76	32	6	50	45	50	35	29	32
NC_040046.1	132104132	132110055	peak_11813	5924	-	-2.78528	0.00419114	24.1753	NA|peak_2220	15	8	28	0	2	2	216	321	223	170	97	163
NC_040051.1	8531071	8531282	peak_2979	212	+	2.78528	0.00419114	24.1753	peak_8209|NA	4	27	8	3	0	0	30	15	10	23	0	2
NC_040072.1	4270600	4270780	peak_9906	181	-	2.7852	0.00419126	24.0671	peak_16981|peak_17733	12	48	28	4	3	0	98	99	82	56	24	66
NC_040048.1	116965908	116966149	peak_15952	242	-	-1.60817	0.00427474	24.4364	NA|peak_6115	30	27	31	50	40	24	118	180	124	93	53	55
NC_040050.1	40752605	40752666	peak_7374	62	-	1.62091	0.004591	26.1271	peak_8019|NA	23	21	50	18	8	16	10	24	33	27	19	46
NC_040074.1	564195	564346	peak_1106	152	-	1.6209	0.00459103	26.0111	peak_17450|NA	28	54	41	20	31	5	22	8	41	31	25	36
NC_040064.1	5754359	5754420	peak_1964	62	-	-1.67527	0.00491106	27.5792	NA|peak_15185	3	2	1	0	0	0	17	31	40	11	26	8
NC_040046.1	150011748	150012048	peak_12200	301	+	-1.67527	0.00491106	27.5792	NA|peak_952	0	2	11	2	11	6	29	44	31	22	11	20
NC_040046.1	121465290	121465351	peak_11571	62	+	1.69326	0.00526293	29.4255	peak_636|NA	21	54	61	15	42	9	2	15	25	24	41	4
NC_040052.1	27344963	27345234	peak_5559	272	-	1.69325	0.00526296	29.1698	peak_9320|peak_9726	77	117	73	82	14	35	62	33	81	92	74	98
NC_040058.1	4000023	4000114	peak_1286	92	+	1.69325	0.00526296	29.1698	peak_12008|NA	59	94	32	48	27	16	38	88	55	107	100	58
NC_040066.1	15724915	15725125	peak_6295	211	-	-1.76016	0.00557683	30.7756	peak_15716|peak_16425	26	26	26	66	29	45	38	39	47	23	26	20
NC_040046.1	62072787	62072848	peak_10732	62	-	-1.49714	0.00564625	30.7593	NA|peak_1675	19	54	36	65	35	27	53	257	182	99	65	57
NC_040071.1	1154390	1154751	peak_932	362	+	-1.49714	0.00564625	30.7593	peak_16668|peak_17422	25	40	16	26	66	3	80	93	83	62	27	28
NC_040046.1	188174224	188174494	peak_12759	271	-	-1.49714	0.00564625	30.7593	NA|peak_2648	13	80	59	70	100	18	44	134	107	33	74	24
NC_040072.1	5357598	5357659	peak_9977	62	+	-3.34574	0.0059697	32.383	NA|peak_17638	21	26	1	22	2	19	46	38	11	6	3	2
NC_040047.1	77175853	77176004	peak_8835	152	+	1.50757	0.0060405	32.354	peak_3107|NA	23	53	36	8	30	11	21	35	28	32	35	31
NC_040046.1	101029165	101029226	peak_11256	62	-	1.50757	0.0060405	32.354	peak_1821|NA	3	15	8	5	4	2	5	9	4	9	10	3
NC_040061.1	11478395	11479036	peak_20944	642	-	1.50757	0.0060405	32.354	peak_13726|NA	6	41	24	0	16	14	11	35	13	25	21	25
NC_040048.1	112841041	112841192	peak_15860	152	+	-1.54676	0.00660976	34.8178	NA|peak_5298	17	26	22	23	42	19	33	27	27	8	21	14
NC_040048.1	80708225	80708376	peak_15516	152	-	-1.54676	0.00660976	34.8178	NA|peak_5909	18	15	20	23	25	23	41	40	40	20	25	15
NC_040067.1	7532784	7533811	peak_16325	1028	+	-1.54676	0.00660976	34.8178	NA|peak_16582	8	12	21	18	23	14	64	82	95	33	29	55
NC_040047.1	11004375	11004525	peak_8043	151	-	-1.54676	0.00660976	34.8178	NA|peak_3729	0	1	6	2	1	6	35	16	19	17	7	10
NC_040049.1	14550469	14551385	peak_19579	917	-	2.02317	0.00678597	35.5989	peak_6458|NA	0	4	3	4	4	11	9	7	9	9	7	2
NC_040055.1	2630238	2630359	peak_16418	122	-	-2.60885	0.00695404	36.3311	NA|peak_11256	10	28	21	4	16	4	16	33	7	3	0	2
NC_040064.1	641193	641254	peak_1761	62	+	-1.56201	0.00705438	36.5557	NA|peak_14919	8	9	9	2	6	4	7	7	5	3	2	20
NC_040049.1	60736549	60736610	peak_20278	62	+	1.56201	0.00705438	36.5557	peak_6266|NA	46	23	22	10	21	11	45	28	16	29	46	48
NC_040046.1	51132212	51132363	peak_10600	152	+	-2.67828	0.00740037	38.1934	NA|peak_279	0	6	6	1	0	0	9	26	23	5	20	3
NC_040047.1	58702219	58702400	peak_8688	182	-	-2.29985	0.00755648	38.8418	NA|peak_4021	8	0	20	0	1	1	15	11	33	4	8	8
NC_040066.1	14532310	14533223	peak_6189	914	+	-1.60816	0.00768659	39.3519	peak_15437|peak_16122	7	23	23	11	44	31	140	325	167	165	52	123
NC_040055.1	11030030	11030180	peak_16641	151	+	-1.60815	0.00768672	39.1952	NA|peak_11173,peak_11172	11	2	29	23	22	23	24	6	4	0	3	15
NC_040046.1	39611039	39611250	peak_10540	212	-	-1.43824	0.00856793	43.3418	NA|peak_1574	10	18	9	18	20	8	16	40	22	13	14	10
NC_040046.1	55671575	55671694	peak_10641	120	+	-1.43824	0.00856793	43.3418	NA|peak_298	2	3	6	2	8	3	12	15	13	4	13	2
NC_040064.1	3818489	3818550	peak_1903	62	-	1.68615	0.00885649	44.6244	peak_14500|NA	10	11	2	12	9	17	14	23	21	12	14	9
NC_040048.1	28423070	28423190	peak_14804	121	+	-1.78871	0.0100675	50.5263	NA|peak_4780	2	0	0	2	0	2	83	109	121	73	61	73
NC_040057.1	20432934	20433473	peak_19362	540	+	-1.48262	0.0101307	50.4464	NA|peak_12377	7	28	21	22	38	13	423	493	377	268	222	185
NC_040061.1	6379643	6379823	peak_20722	181	+	-1.48262	0.0101307	50.4464	NA|peak_14072	6	24	12	26	15	14	41	64	57	20	37	27
NC_040048.1	108450997	108451208	peak_15808	212	+	1.82599	0.0106535	52.8432	peak_5032|peak_5272	131	1092	757	15	47	59	193	249	167	50	29	50
NC_040046.1	121461336	121461397	peak_11570	62	+	1.5006	0.0107463	52.8921	peak_635|NA	40	77	102	28	62	18	16	18	27	31	45	6
NC_040046.1	5662831	5662891	peak_10145	61	-	-1.5006	0.0107463	52.8921	NA|peak_1381	2	24	28	8	16	2	80	46	73	108	41	115
NC_040075.1	74097901	74097962	peak_18242	62	+	-3.19366	0.0111065	54.2459	NA|peak_18720	7	0	3	2	3	5	15	4	5	1	2	0
NC_040059.1	9605729	9605789	peak_17093	61	-	3.19366	0.0111065	54.2459	peak_12747|NA	5	0	17	1	7	14	13	1	2	1	1	0
NC_040049.1	15880772	15880923	peak_19618	152	-	-1.93006	0.011212	54.3447	NA|peak_6745	57	17	47	86	119	105	38	52	36	8	47	41
NC_040048.1	461554	461645	peak_14212	92	+	-1.93006	0.011212	54.3447	NA|peak_4521	2	7	3	7	23	3	11	10	17	23	3	2
NC_040046.1	51942243	51942364	peak_10602	122	+	3.29962	0.0117343	56.6613	peak_273|NA	2	15	11	0	1	2	5	15	22	7	12	16
NC_040050.1	40469816	40469876	peak_7363	61	+	-2.48316	0.0122747	59.0468	NA|peak_7734	12	23	20	4	9	8	7	6	7	2	0	0
NC_040046.1	81601566	81601657	peak_11042	92	+	1.56199	0.0126147	60.4543	peak_445|peak_470	88	276	145	12	116	137	36	48	40	72	99	28
NW_020866106.1	5697	5846	peak_18286	150	+	2.20016	0.0127525	60.8858	peak_18482|NA	6	8	11	0	0	2	0	12	13	5	4	0
NC_040047.1	112811152	112811392	peak_9212	241	+	-1.37683	0.0128859	60.3916	NA|peak_3405	5	4	3	4	6	4	45	60	70	35	21	29
NC_040064.1	3187659	3187720	peak_1844	62	-	1.37683	0.0128859	60.3916	peak_14481|NA	38	94	9	52	72	45	43	90	109	81	25	11
NC_040049.1	50374179	50374715	peak_20169	537	+	-1.37683	0.0128859	60.3916	NA|peak_6485	3	0	1	5	0	0	12	13	10	9	4	4
NC_040066.1	15129453	15129574	peak_6250	122	-	1.37683	0.0128859	60.3916	peak_15702|NA	47	62	31	36	94	46	45	46	49	9	30	30
NC_040048.1	4893877	4894028	peak_14309	152	-	-1.37683	0.0128859	60.3916	NA|peak_5411	13	35	0	19	20	16	123	105	102	48	43	74
NC_040048.1	30721863	30722043	peak_14833	181	+	-1.37682	0.0128861	60.1713	NA|peak_4800	5	5	1	1	3	9	117	102	98	64	46	49
NC_040050.1	56921400	56921461	peak_7614	62	+	-2.56273	0.0129612	60.0821	NA|peak_7857	220	477	326	26	28	38	475	415	472	291	196	275
NC_040046.1	193599976	193600127	peak_12819	152	-	-2.56273	0.0129612	60.0821	NA|peak_2683	2	7	2	1	0	0	65	95	64	52	30	40
NC_040047.1	26123517	26123638	peak_8261	122	-	-2.56265	0.0129615	59.6495	NA|peak_3820	5	3	3	0	1	0	95	78	81	35	37	34
NC_040050.1	34639436	34639557	peak_7087	122	+	2.56265	0.0129615	59.6495	peak_7267|NA	34	49	94	3	11	2	58	85	100	9	5	85
NC_040054.1	16397467	16397528	peak_14034	62	-	1.39208	0.0136233	62.2459	peak_10497|NA	26	44	22	20	14	8	27	33	23	51	16	39
NC_040048.1	58778901	58779110	peak_15283	210	+	-1.39208	0.0136233	62.2459	NA|peak_5044	4	12	8	7	2	2	10	6	14	0	0	0
NC_040065.1	5027833	5027894	peak_4558	62	-	-1.39208	0.0136234	61.8032	NA|peak_15740	43	60	64	13	19	46	29	54	50	45	60	51
NC_040047.1	96440440	96440530	peak_9030	91	-	1.39208	0.0136234	61.8032	peak_4010|NA	22	64	39	15	35	8	0	20	12	7	10	23
NC_040073.1	4979373	4979493	peak_3741	121	-	-1.60814	0.0139306	62.9728	NA|peak_18087	0	7	8	2	15	9	89	104	73	53	37	74
NC_040050.1	56418697	56419687	peak_7605	991	-	-1.4155	0.015382	68.5614	NA|peak_8492	2	0	9	0	2	12	185	248	145	136	97	80
NC_040051.1	7051113	7051174	peak_2963	62	+	-1.4155	0.015382	68.5614	NA|peak_8593	2	1	7	5	4	4	24	30	23	21	17	4
NC_040063.1	6954528	6954649	peak_18799	122	-	-1.4155	0.015382	68.5614	NA|peak_14787	6	23	4	9	28	9	11	15	19	8	11	5
NC_040060.1	2838842	2839020	peak_13148	179	+	-1.4155	0.015382	68.5614	NA|peak_13475	4	14	14	18	25	0	23	42	18	19	21	5
NC_040046.1	159265213	159265362	peak_12378	150	-	-1.70124	0.0161118	71.5638	NA|peak_2483	14	28	42	132	17	16	106	30	89	110	25	22
NC_040055.1	13401246	13401307	peak_16731	62	-	-1.46375	0.018306	81.0276	NA|peak_11405	0	1	10	6	1	10	31	34	45	13	27	26
NC_040046.1	124912989	124913110	peak_11715	122	+	-1.83117	0.0183159	80.7907	NA|peak_748	8	28	13	3	5	4	19	19	25	3	0	2
NC_040075.1	17970632	17970753	peak_17598	122	-	-1.31269	0.019197	84.0952	NA|peak_18861	14	24	8	14	20	22	32	52	42	29	12	24
NC_040052.1	14783924	14784045	peak_5215	122	+	-1.31269	0.019197	84.0952	NA|peak_9196	27	31	42	48	41	33	51	74	73	28	32	40
NC_040049.1	11934318	11935468	peak_19549	1151	-	1.33068	0.0201811	88.1037	peak_6439|NA	10	12	24	2	12	8	15	23	24	35	22	22
NC_040048.1	39380024	39380084	peak_14974	61	-	-3.02365	0.0205177	89.2672	NA|peak_5690	7	14	3	4	8	5	4	6	5	0	2	0
NC_040047.1	57221200	57221543	peak_8664	344	-	2.09316	0.0213075	92.3881	peak_3838|peak_4011	14	19	13	2	2	0	27	25	30	12	1	14
NC_040050.1	3827518	3827609	peak_6393	92	-	-2.34566	0.0214554	92.7141	NA|peak_7975	0	0	2	0	0	1	6	10	10	0	1	2
NC_040046.1	171146916	171146977	peak_12584	62	-	-3.14746	0.021507	92.3112	NA|peak_2565	5	2	1	0	1	0	5	17	14	9	8	9
NC_040049.1	6496985	6502385	peak_19488	5401	+	3.14746	0.021507	92.3112	peak_5923|NA	2	4	10	2	0	0	31	35	33	48	23	18
NC_040048.1	11152802	11152923	peak_14445	122	+	3.14745	0.021507	91.6938	peak_4408|NA	4	10	47	2	3	2	24	64	35	22	19	32
NC_040065.1	9301147	9301207	peak_4753	61	+	3.14745	0.021507	91.6938	peak_14809|NA	16	33	12	3	3	1	13	40	28	21	19	10
NC_040051.1	2889354	2889415	peak_2891	62	+	3.14691	0.0215221	91.4522	peak_8166|NA	16	6	9	0	36	1	12	11	4	82	62	13
NC_040050.1	61429703	61429764	peak_7710	62	-	-2.43704	0.0224917	95.255	NA|peak_8541	0	7	3	0	1	0	7	6	3	2	3	4
NC_040053.1	12084955	12085016	peak_2289	62	+	-2.43696	0.0224921	94.6278	NA|peak_9904	9	0	11	0	2	0	12	8	4	2	0	8
NC_040050.1	38271024	38271174	peak_7272	151	-	2.43696	0.0224921	94.6278	peak_7971|NA	6	6	8	2	0	0	3	7	11	0	7	2
NC_040049.1	34772381	34772472	peak_19889	92	-	2.43643	0.0225122	94.4009	peak_6595|NA	3	8	3	1	13	0	1	5	2	23	7	16
NC_040048.1	79447636	79447727	peak_15482	92	+	2.43642	0.0225123	93.7841	peak_4898|NA	239	426	418	500	562	13	452	10	14	721	716	590
NC_040075.1	22852755	22852816	peak_17668	62	-	2.43642	0.0225123	93.7841	peak_18084|NA	26	37	25	34	38	16	4	4	2	16	25	6
NC_040065.1	8839769	8839860	peak_4725	92	-	-1.3451	0.0231225	95.701	NA|peak_15828	6	34	24	27	49	9	20	24	37	20	8	17
NC_040050.1	64018093	64018154	peak_7757	62	-	-1.3451	0.0231225	95.701	NA|peak_8550	15	16	13	18	16	22	20	23	12	9	12	10
NC_040055.1	8639080	8639231	peak_16617	152	-	1.36934	0.0242429	100.013	peak_10863|NA	48	103	57	24	62	26	15	47	33	39	58	34
NC_040046.1	108046550	108046701	peak_11320	152	+	-1.65575	0.0266614	109.636	NA|peak_590	5	42	38	3	2	1	25	26	28	11	2	3
NC_040056.1	12712546	12712697	peak_393	152	-	1.65508	0.0266988	109.437	peak_11523|NA	26	94	87	40	50	51	87	14	28	97	82	74
NC_040075.1	34439037	34439097	peak_17830	61	-	-1.38574	0.0278142	113.28	NA|peak_18963	4	4	9	16	6	4	23	12	19	8	7	19
NC_040046.1	78388858	78390146	peak_10960	1289	+	-1.38574	0.0278142	113.28	NA|peak_440	6	12	11	19	16	7	80	82	74	37	37	74
NC_040057.1	3275545	3275606	peak_19139	62	+	-1.24557	0.0283119	114.212	NA|peak_12270	11	28	16	26	22	20	29	37	40	19	15	24
NC_040066.1	12291071	12292267	peak_6105	1197	+	-1.24557	0.0283119	114.212	NA|peak_16082	5	20	12	6	14	23	14	39	38	28	12	9
NC_040056.1	20270874	20271024	peak_726	151	-	-1.24557	0.0283119	114.212	NA|peak_12186	61	131	38	108	137	25	106	92	119	58	49	60
NC_040073.1	5712965	5713085	peak_3800	121	+	-1.41759	0.0290847	116.96	NA|peak_17938	22	156	110	33	63	73	141	160	15	204	141	144
NC_040046.1	59985026	59985207	peak_10682	182	+	1.26653	0.0296012	118.662	peak_306|NA	40	171	165	39	45	106	32	40	92	33	75	82
NC_040057.1	10284372	10284493	peak_19216	122	-	-1.72433	0.0296201	118.366	NA|peak_12452	8	6	15	2	2	4	6	9	21	2	0	1
NC_040059.1	3385489	3385550	peak_16902	62	-	-1.72359	0.0296564	118.141	NA|peak_13255	21	4	5	26	29	19	49	47	49	56	59	5
NC_040050.1	388454	388515	peak_6313	62	-	-1.72358	0.0296568	117.775	NA|peak_7938	5	5	6	12	11	17	18	14	11	16	17	5
NC_040059.1	3385788	3385909	peak_16903	122	-	-1.4382	0.0333808	132.152	NA|peak_13254,peak_13256	26	10	18	37	37	20	108	104	91	91	80	37
NC_040063.1	963057	963118	peak_18596	62	-	-1.27109	0.0343872	134.879	NA|peak_14706	1	4	2	4	5	0	11	19	5	9	3	9
NC_040064.1	3409679	3409799	peak_1867	121	-	-1.27109	0.0343872	134.879	NA|peak_15146	34	39	31	26	63	51	41	65	90	50	65	0
NC_040053.1	7378098	7381477	peak_2202	3380	-	-1.27109	0.0343872	134.879	NA|peak_10241	25	43	56	31	67	60	99	143	116	87	54	74
NC_040061.1	10847806	10847956	peak_20915	151	+	-1.27109	0.0343876	134.467	NA|peak_14144	47	93	103	103	156	71	140	227	209	100	98	152
NC_040048.1	28938891	28938982	peak_14812	92	-	1.97768	0.0352046	137.241	peak_5382|NA	2	26	6	0	3	0	20	16	8	6	5	4
NC_040048.1	26544239	26553354	peak_14780	9116	-	1.97699	0.0352379	136.952	peak_5366|NA	12	34	42	10	35	35	2	6	8	20	15	12
NC_040051.1	15013424	15013867	peak_3131	444	-	-1.29984	0.0357906	138.677	NA|peak_8943	2	7	9	0	0	1	4	14	10	1	1	2
NC_040075.1	25773108	25773169	peak_17725	62	-	1.29894	0.0358541	138.084	peak_18101|NA	0	7	2	0	3	2	2	5	3	4	4	6
NC_040051.1	5953682	5953862	peak_2944	181	+	1.29894	0.0358541	138.084	peak_8191|NA	17	19	17	12	14	4	13	15	16	10	31	21
NC_040047.1	126688106	126691792	peak_9369	3687	+	-2.83093	0.037586	144.318	NA|peak_3501	0	4	2	0	3	2	5	13	19	2	2	2
NC_040048.1	71761525	71761796	peak_15443	272	-	-2.29954	0.0386152	147.382	NA|peak_5884	2	13	4	2	0	0	136	131	159	78	73	44
NC_040047.1	57741300	57741361	peak_8675	62	+	2.29954	0.0386152	147.382	peak_3043|NA	4	9	15	0	3	0	0	24	13	7	10	4
NC_040066.1	4925547	4925607	peak_5927	61	+	2.97753	0.0390931	148.318	peak_15318|NA	49	70	68	23	0	2	7	70	11	48	34	14
NC_040048.1	28140202	28140263	peak_14803	62	+	2.97753	0.0390931	148.318	peak_4561|NA	6	32	9	6	0	0	12	22	16	9	17	11
NC_040048.1	102584580	102584730	peak_15748	151	+	2.97745	0.0390935	147.006	peak_5007|NA	3	13	6	2	0	1	66	74	75	93	74	77
NC_040052.1	5125116	5125207	peak_5067	92	+	2.97745	0.0390935	147.006	peak_8735|NA	7	11	4	1	1	1	41	33	48	43	27	38
NC_040069.1	2658351	2658502	peak_4051	152	-	-2.97745	0.0390935	147.006	NA|peak_17095	90	94	107	21	20	0	183	169	97	124	132	91
NC_040046.1	163477724	163477843	peak_12483	120	+	2.97745	0.0390935	146.144	peak_1029|NA	2	10	18	0	0	4	10	14	20	6	13	8
NC_040048.1	11152264	11152325	peak_14443	62	+	2.97745	0.0390935	146.144	peak_4407|NA	4	8	48	2	4	2	29	13	16	15	5	17
NC_040052.1	36291413	36291533	peak_5735	121	-	1.17517	0.0413082	152.192	peak_9384|NA	20	19	40	65	19	7	10	63	52	30	22	18
NC_040054.1	6523326	6523447	peak_13744	122	+	-1.17517	0.0413082	152.192	NA|peak_10573	0	10	4	6	4	7	18	13	12	5	5	14
NC_040053.1	24574479	24574630	peak_2542	152	-	-1.17517	0.0413082	152.192	NA|peak_10381	2	2	6	6	3	3	27	41	35	18	18	22
NC_040048.1	55672149	55672269	peak_15237	121	-	-1.17517	0.0413082	152.192	NA|peak_5794,peak_5796	11	33	25	35	30	17	102	117	117	86	52	54
NC_040047.1	135123905	135124175	peak_9482	271	+	-1.17517	0.0413082	152.192	NA|peak_3557	2	40	66	50	26	48	309	336	326	194	187	166
NC_040055.1	18733736	18733797	peak_16795	62	-	1.56257	0.0414637	152.325	peak_10958|NA	6	12	9	2	0	0	2	2	6	0	0	2
NC_040059.1	4632030	4632300	peak_16930	271	+	-1.30327	0.0417802	153.046	NA|peak_13031	1	12	7	23	7	2	274	332	309	207	212	177
NC_040054.1	19751996	19752087	peak_14118	92	-	-1.20023	0.042887	156.651	NA|peak_11000	0	59	36	1	2	2	7	61	7	4	3	2
NC_040046.1	119375473	119375594	peak_11495	122	+	1.19941	0.0429625	156.032	peak_617|NA	7	23	24	3	11	15	19	35	20	48	16	25
NC_040061.1	5161339	5161411	peak_20674	73	-	1.19941	0.0429625	156.032	peak_13598,peak_13597|NA	53	52	74	16	73	7	41	92	72	78	72	95
NC_040046.1	571498	571559	peak_10023	62	-	1.33958	0.0434432	156.884	peak_1245|NA	67	136	113	27	119	51	82	24	11	75	52	60
NC_040065.1	5379082	5379584	peak_4591	503	+	1.33958	0.0434432	156.884	peak_14752|NA	50	67	65	48	43	22	21	9	28	32	25	34
NC_040055.1	6310	6370	peak_16357	61	-	1.6081	0.0473666	170.569	peak_10751|NA	0	0	2	3	0	2	3	3	5	1	5	4
NC_040052.1	23250947	23251127	peak_5486	181	-	1.67805	0.0491111	176.353	peak_9297|peak_9691	8	7	20	0	2	1	14	22	22	4	8	3
