# Supplementary material for: Profiling Analysis of N6-Methyladenosine mRNA Methylation Reveals Differential m6A Patterns during the Embryonic Skeletal Muscle Development of Ducks
Source: Animals (Basel). 2022 Sep 28;12(19):2593. doi: 10.3390/ani12192593 (PMC9559603; doi:10.3390/ani12192593)
Supplement: Supplementary file 1 [file animals-12-02593-s001.zip › Table S10.xls]

Geneid	Chr	Start	End	Name	Length	Strand	logFC	Pvalue	FDR	Treat|Control	Annotation	Annotated_Transcript	T1_IP	T2_IP	T3_IP	T1_Input	T2_Input	T3_Input	C1_IP	C2_IP	C3_IP	C1_Input	C2_Input	C3_Input
EML4	NC_040048.1	39753286	39753586	peak_14979	301	-	-0.0230962259249	1.0	60.6109510086	peak_5457|peak_5692	cds	rna-XM_013095592.3	657	1269	1116	555	735	514	1452	2304	1933	1062	1282	1160
PIGL	NC_040065.1	9395836	9395957	peak_4768	122	-	-0.0230949640235	1.0	60.6109510086	NA|peak_15858	utr3	rna-XM_021274876.2	34	86	60	41	80	46	52	101	86	33	76	65
LOC110354585	NW_020866968.1	78249	78580	peak_3486	332	+	-0.0230974879642	1.0	60.6109510086	peak_18578|peak_19376	utr3	rna-XM_027448891.1	296	471	504	206	226	164	122	182	138	85	31	66
02cdfd9c-498e-44af-8f4c-13e33263afa1	NC_040056.1	539066	539186	peak_58	121	-	0.97706143416	1.0	60.6109510086	peak_11351,peak_11353|NA	NP_exon	02cdfd9c-498e-44af-8f4c-13e33263afa1.trans	83	81	55	24	40	27	26	26	36	64	9	7
KCMF1	NC_040075.1	49836445	49836686	peak_17984	242	+	-0.0230192825141	1.0	60.6109510086	peak_17785|peak_18585	utr5	rna-XM_027446804.1	342	531	469	197	96	128	421	467	543	195	99	175
MIA2	NC_040050.1	28893816	28893936	peak_6950	121	-	0.0230962259249	1.0	60.6109510086	peak_7860|NA	cds	rna-XM_013101328.3	60	101	89	49	58	44	92	68	97	62	37	60
PEAK1	NC_040056.1	13273880	13274719	peak_426	840	+	-0.0230962259249	1.0	60.6109510086	peak_11154|peak_11636	cds	rna-XM_027466103.1	2337	4884	3860	1617	2254	1781	3684	4469	3699	2220	1964	1889
DLG1	NC_040054.1	13028798	13032238	peak_13900	3441	+	-1.02309622592	0.622022411019	249.822057759	peak_10173|peak_10635	utr3	rna-XM_027464835.1	790	1471	1202	587	815	636	1129	1191	908	822	481	522
ZNF292	NC_040048.1	80873065	80873636	peak_15530	572	-	0.561865012757	1.0	60.6109510086	peak_5670|peak_5926	cds	rna-XM_027454930.1	456	930	624	241	296	188	851	877	663	408	272	265
DCTN1	NC_040049.1	75805789	75805909	peak_20551	121	+	0.0230962259249	1.0	60.6109510086	peak_6365|NA	utr3	rna-XM_027455900.1	171	191	194	98	95	155	178	372	217	95	186	166
PPIP5K1	NC_040056.1	186227	186916	peak_24	690	-	-0.0230962259249	1.0	60.6109510086	peak_11336|peak_11848	cds	rna-XM_013105030.3	577	992	890	446	457	355	832	876	967	459	357	387
COL25A1	NC_040049.1	4474475	4511869	peak_19435	37395	+	0.976903774075	1.0	60.6109510086	peak_5896|peak_6149	cds	rna-XM_027457459.1	587	1346	1289	433	616	681	878	1026	1231	726	619	854
POFUT2	NC_040052.1	15712940	15713358	peak_5244	419	+	-1.02309622592	0.622022411019	249.822057759	peak_8816|peak_9215	utr3	rna-XM_027460993.1	326	542	462	266	395	215	550	856	717	424	383	391
TTN	NC_040052.1	20192077	20192318	peak_5413	242	+	0.976903774075	1.0	60.6109510086	peak_8936|peak_9323	cds	rna-XM_027461598.1	1693	2857	2552	1330	1576	1140	572	788	646	425	367	418
ATXN1	NC_040047.1	52205252	52264173	peak_8626	58922	-	-0.0230949640235	1.0	60.6109510086	peak_3825|peak_3996	utr5	rna-XM_027451269.1	556	704	732	771	777	669	1018	1277	819	1189	1093	966
CLIP1	NC_040061.1	12528415	12528476	peak_21018	62	-	0.0230962259249	1.0	60.6109510086	peak_13762|NA	cds	rna-XM_027470158.1	74	161	117	62	100	60	290	319	223	196	156	141
SUCO	NC_040053.1	27198937	27199266	peak_2658	330	+	-0.0230962259249	1.0	60.6109510086	peak_9678|peak_10100	cds	rna-XM_027462738.1	381	676	555	340	465	302	567	690	656	476	370	435
FZD1	NC_040047.1	23573311	23573552	peak_8209	242	+	-0.0230962259249	1.0	60.6109510086	peak_2832|peak_2955	utr3	rna-XM_027450762.1	172	347	309	118	147	135	717	548	607	384	274	324
THOC5	NC_040061.1	9626418	9626598	peak_20874	181	+	-0.0230962259249	1.0	60.6109510086	peak_13493|peak_14124	cds	rna-XM_027469796.1	569	871	707	526	532	441	967	1051	1000	657	530	788
WNT16	NC_040046.1	178788823	178789152	peak_12666	330	+	-0.0230974879642	1.0	60.6109510086	peak_1106|peak_1180	utr3	rna-XM_027457925.1	21	51	39	9	23	16	375	218	378	148	83	198
KCNE3	NC_040046.1	1049368	1049578	peak_10056	211	-	0.562022681457	1.0	60.6109510086	peak_1253|peak_1331	utr3	rna-XM_027462329.1	123	257	158	19	57	104	145	172	170	90	72	113
M6PR	NC_040046.1	123859118	123859328	peak_11691	211	-	-0.0230167670511	1.0	60.6109510086	peak_2048|peak_2160	utr3	rna-XM_027449882.1	717	1385	1077	744	912	640	1798	2140	1830	1839	1175	1354
KIAA0391	NC_040050.1	30574787	30580039	peak_6968	5253	-	-0.0230962259249	1.0	60.6109510086	peak_7867,peak_7868,peak_7869|peak_8228,peak_8229	cds	rna-XM_027459388.1	185	344	283	131	171	116	601	709	573	352	282	312
LOC101801322	NC_040061.1	3950952	3951371	peak_20626	420	-	-0.0230180247139	1.0	60.6109510086	peak_13572|peak_14220	cds	rna-XM_027469873.1	250	624	505	161	281	160	954	1200	893	531	442	392
CHRM4	NC_040050.1	36350799	36350860	peak_7180	62	+	-0.0230962259249	1.0	60.6109510086	NA|peak_7648	cds	rna-XM_027459262.1	12	37	9	13	16	1	83	100	86	49	39	56
SSR1	NC_040047.1	68227989	68228438	peak_8794	450	-	-0.0230962259249	1.0	60.6109510086	peak_3896|peak_4071	utr3	rna-XM_027451606.1	815	1285	1319	675	830	665	436	772	549	383	331	347
MAP9	NC_040049.1	30938754	30945480	peak_19834	6727	+	-0.0230974879642	1.0	60.6109510086	peak_6089|peak_6342	cds	rna-XM_027456608.1	155	299	292	81	144	86	200	271	219	94	113	89
USP44	NC_040046.1	156543617	156543737	peak_12324	121	-	-0.608138189896	0.685021782428	249.71257932	NA|peak_2466	cds	rna-XM_027452257.1	59	132	72	41	59	29	42	60	109	26	25	30
GNAS	NC_040066.1	10928996	10930654	peak_6085	1659	+	-0.0230962259249	1.0	60.6109510086	peak_15389|peak_16070,peak_16071	utr3	rna-XM_005010397.4	1639	2697	2255	1029	1319	997	2661	2892	2044	1507	1079	1162
ATF7IP	NC_040046.1	159930976	159950574	peak_12392	19599	+	-0.0230180247139	1.0	60.6109510086	peak_966|peak_1044,peak_1045	cds	rna-XM_027453498.1	1949	3753	2919	1057	1913	1107	2495	4506	3557	2163	1805	1706
LOC101797522	NC_040046.1	17736697	17736788	peak_10288	92	-	-0.438215721425	0.724403954196	246.977288619	NA|peak_1444	utr3	rna-XM_027468877.1	29	35	37	24	5	0	44	138	43	25	20	9
ENTPD1	NC_040051.1	14984100	14984401	peak_3129	302	-	-1.02309622592	0.622022411019	249.822057759	NA|peak_8941	utr3	rna-XM_021268077.2	20	52	37	18	32	16	238	191	200	77	105	98
LOC101796851	NC_040048.1	93723117	93723297	peak_15685	181	+	-0.0230962259249	1.0	60.6109510086	peak_4986|peak_5226	utr3	rna-XM_027455109.1	78	137	107	70	96	62	161	213	159	110	122	117
LACTB	NC_040056.1	14526924	14527759	peak_473	836	-	0.976903774075	1.0	60.6109510086	peak_11560|peak_12078	cds	rna-XM_021277803.2	630	1265	1102	517	604	490	1391	1530	1543	981	743	891
ETFDH	NC_040049.1	29566791	29567423	peak_19818	633	-	-0.0230180247139	1.0	60.6109510086	peak_6561|peak_6833	utr3	rna-XM_027456524.1	1307	1750	1746	803	815	598	1156	1562	1134	667	632	506
TMEM132C	NC_040061.1	990965	991146	peak_20571	182	+	-0.0231744228972	1.0	60.6109510086	NA|peak_13984	utr3	rna-XM_027469969.1	28	16	20	25	34	7	104	129	126	94	69	58
1d0b6bb0-92e2-4ed4-a489-2fc3e1d72af7	NC_040075.1	37213877	37213938	peak_17850	62	+	1.97713256857	6.71934834769e-05	0.648910642329	peak_17730|NA	NP_exon	1d0b6bb0-92e2-4ed4-a489-2fc3e1d72af7.trans	2	7	7	2	3	0	11	15	18	23	16	12
PAX9	NC_040050.1	29901298	29901359	peak_6959	62	-	-0.608139456313	0.685021649249	256.158615462	NA|peak_8224	utr3	rna-XM_027457584.1	6	0	6	1	0	4	8	6	6	0	4	2
SLC6A15	NC_040046.1	152262307	152262578	peak_12254	272	-	-0.0230962259249	1.0	60.6109510086	NA|peak_2419	cds	rna-XM_005018371.4	7	38	19	11	20	3	206	226	148	122	90	74
ARAP2	NC_040049.1	53894000	53899841	peak_20230	5842	+	-0.0230180247139	1.0	60.6109510086	NA|peak_6512	cds	rna-XM_027457267.1	2	12	16	2	4	6	155	162	140	81	73	55
MRTO4	NC_040067.1	1564810	1565543	peak_16081	734	+	-0.0230962259249	1.0	60.6109510086	peak_15782|peak_16493	utr3	rna-XM_027443040.1	1705	2783	2498	1168	1626	1149	2159	3837	3362	1607	1572	1830
GORASP1	NC_040047.1	5277127	5277366	peak_7962	240	+	-1.02309622592	0.622022411019	249.822057759	NA|peak_2852	utr3	rna-XM_027450378.1	167	385	170	131	229	127	329	491	324	217	212	188
MMS22L	NC_040048.1	76490922	76493417	peak_15466	2496	+	-0.0230962259249	1.0	60.6109510086	peak_4888|peak_5129	cds	rna-XM_027454818.1	27	75	45	21	36	18	69	102	84	47	44	48
LOC101799791	NC_040060.1	7916952	7927809	peak_13350	10858	+	-0.0230962259249	1.0	60.6109510086	peak_12975,peak_13239,peak_12976,peak_12977,peak_12978|peak_13848,peak_13563	NP_exon	rna-XR_003500783.1	734	1590	1100	604	796	481	2160	2730	2507	1383	1233	1528
PSMC3	NC_040050.1	57536868	57540178	peak_7632	3311	+	-0.0230962259249	1.0	60.6109510086	peak_7532|peak_7868	cds	rna-XM_027457686.1	5410	10437	6111	4065	4873	2320	6130	8666	7709	3970	3654	4423
FIP1L1	NC_040049.1	48871951	48880113	peak_20145	8163	-	-0.0230962259249	1.0	60.6109510086	peak_6722|peak_6986	cds	rna-XM_027457086.1	1254	2236	2234	993	1256	982	2430	3058	2292	1761	1389	1279
PLXNB1	NC_040058.1	21775039	21775159	peak_1663	121	+	-1.6081381899	0.371038958738	572.626096768	NA|peak_12746	cds	rna-XM_027467343.1	197	257	40	136	28	131	329	296	412	74	230	39
ATAD2B	NC_040048.1	110640394	110644891	peak_15818	4498	-	-0.0230962259249	1.0	60.6109510086	peak_5809|peak_6055	cds	rna-XM_027455574.1	322	685	628	234	330	241	513	663	618	404	260	290
MYF5	NC_040046.1	161094436	161094702	peak_12448	267	-	0.0230962259249	1.0	60.6109510086	peak_2372|NA	cds	rna-NM_001310776.1	721	981	896	594	600	509	913	1144	635	762	691	427
CCDC102B	NC_040047.1	98933914	98956287	peak_9038	22374	-	-0.976981975286	1.0	60.6109510086	NA|peak_4200	cds	rna-XM_027451912.1	50	75	91	20	32	45	116	125	97	74	60	65
KIF16B	NC_040048.1	10331897	10332077	peak_14436	181	+	0.976981975286	1.0	60.6109510086	peak_4401|peak_4609	utr3	rna-XM_027453317.1	45	66	53	23	32	16	61	65	50	42	33	28
RUFY1	NC_040059.1	7159166	7159347	peak_16995	182	+	-0.0230180247139	1.0	60.6109510086	peak_12498|peak_13064	utr5	rna-XM_021275549.2	87	165	191	66	73	70	204	192	245	146	81	122
HIC2	NC_040061.1	5433566	5500004	peak_20683	66439	+	-0.0230962259249	1.0	60.6109510086	peak_13423|peak_14046	utr5	rna-XM_027470272.1	638	1221	1207	579	674	660	2206	2902	2558	1869	1411	1728
ARHGAP24	NC_040049.1	44881399	44881610	peak_20045	212	+	-0.0230167670511	1.0	60.6109510086	peak_6169|peak_6434	utr3	rna-XM_027456950.1	253	358	299	212	243	164	171	180	183	153	87	151
FAM83H	NC_040047.1	155337645	155337706	peak_9674	62	-	-0.976903774075	1.0	60.6109510086	NA|peak_4503	cds	rna-XM_005026032.4	20	45	44	9	28	18	135	187	147	116	102	73
HBEGF	NC_040059.1	12758979	12759275	peak_17197	297	+	0.976903774075	1.0	60.6109510086	peak_12592|peak_13153	utr3	rna-XM_027468562.1	1005	1717	1438	684	721	615	571	560	404	344	246	312
GCFC2	NC_040048.1	110971584	110971704	peak_15832	121	+	1.02309622592	0.622022411019	249.822057759	peak_5040|NA	utr3	rna-XM_027455321.1	166	319	209	185	195	111	184	469	305	158	211	168
SACS	NC_040046.1	19109251	19109612	peak_10311	362	-	-0.0230962259249	1.0	60.6109510086	peak_1373|peak_1459	cds	rna-XM_027469215.1	385	1131	755	361	547	243	631	506	561	350	187	278
ADPRH	NC_040046.1	107596793	107596973	peak_11302	181	+	-0.0230962259249	1.0	60.6109510086	peak_553|peak_586	cds	rna-XM_013097658.3	152	346	224	107	152	105	300	248	314	175	105	127
AMER1	NC_040055.1	3752221	3752550	peak_16448	330	+	-0.0230962259249	1.0	60.6109510086	peak_10607|peak_11081	cds	rna-XM_027465511.1	173	268	164	116	115	105	246	367	396	182	173	218
LOC113840719	NW_020865212.1	10536	10657	peak_1216	122	-	-0.0230962259249	1.0	60.6109510086	NA|peak_19208	cds	rna-XM_027447458.1	3	151	71	6	62	49	137	45	122	68	20	66
TIGAR	NC_040046.1	124580224	124580374	peak_11711	151	-	-0.0230962259249	1.0	60.6109510086	peak_2059|peak_2169	cds	rna-XM_027449912.1	107	274	156	64	131	100	234	337	338	178	148	166
P3H3	NC_040046.1	121802183	121803473	peak_11607	1291	+	0.0230167670511	1.0	60.6109510086	peak_648|NA	NP_exon	rna-XR_003494930.1	520	864	812	440	598	496	743	1057	888	722	670	726
MCEE	NC_040056.1	16296920	16304794	peak_503	7875	+	-0.0230962259249	1.0	60.6109510086	peak_11569|peak_12087,peak_11680	cds	rna-XM_027466202.1	1927	3870	2949	1205	1893	1104	4185	4956	4725	2677	2022	2426
RARS	NC_040059.1	17139069	17139160	peak_17322	92	-	-0.0230962259249	1.0	60.6109510086	NA|peak_13419	utr3	rna-XM_027468162.1	256	451	340	273	319	227	426	483	411	332	306	288
SYNM	NC_040056.1	3932723	3933053	peak_159	331	-	-0.0230180247139	1.0	60.6109510086	peak_11397|peak_11912	utr3	rna-XM_027465718.1	78	143	148	41	70	36	204	229	190	108	86	99
OBSCN	NC_040047.1	2573344	2575749	peak_7890	2406	+	-0.0230962259249	1.0	60.6109510086	peak_2684|peak_2818,peak_2819	cds	rna-XM_027450316.1	1838	2891	3083	1795	1846	1575	653	748	592	477	403	445
LACTB	NC_040056.1	14523837	14524507	peak_472	671	-	-0.0230962259249	1.0	60.6109510086	peak_11559|peak_12077	cds	rna-XM_021277803.2	674	1343	1214	425	790	449	1432	1786	1611	1088	729	789
DBX1	NC_040050.1	58569318	58570036	peak_7689	719	-	-0.0230962259249	1.0	60.6109510086	peak_8144|peak_8528	utr3	rna-XM_027458029.1	940	2082	1731	678	933	648	604	552	408	343	252	182
217df2de-6397-43c5-a202-a991795d7737	NC_040046.1	149266330	149267512	peak_12146	1183	+	-0.0230962259249	1.0	60.6109510086	peak_861|peak_924	NP_exon	217df2de-6397-43c5-a202-a991795d7737.trans	5829	8870	8459	3796	4066	3173	3220	4373	3926	1963	1689	1789
EXOSC3	NC_040051.1	26698874	26700551	peak_3336	1678	+	-0.0230167670511	1.0	60.6109510086	peak_8362|peak_8760	utr3	rna-XM_027460030.1	818	1422	1210	796	1027	599	759	891	763	671	499	596
LOC113842964	NC_040047.1	337255	338230	peak_7797	976	-	0.976981975286	1.0	60.6109510086	peak_3472|peak_3629	cds	rna-XM_027452866.1	228	416	375	164	150	169	355	549	426	273	306	286
NRN1	NC_040047.1	68490597	68490657	peak_8800	61	+	-0.714102735272	0.726602218118	246.081392666	NA|peak_3225	utr3	rna-XM_027451610.1	8	9	8	3	0	2	39	39	71	29	17	11
KCND3	NC_040072.1	1668516	1668697	peak_9776	182	-	-2.34519698422	3.65235074917e-05	0.384785571677	NA|peak_17687	utr3	rna-XM_027444755.1	0	1	2	3	0	2	41	61	38	32	18	3
SP3	NC_040052.1	22091525	22091585	peak_5465	61	+	-0.0230167670511	1.0	60.6109510086	NA|peak_9359	cds	rna-XM_021272516.2	93	232	160	112	158	114	204	257	221	177	154	160
TBCEL	NC_040070.1	4511822	4511913	peak_18433	92	+	0.976903774075	1.0	60.6109510086	peak_16471|NA	utr3	rna-XM_027444292.1	5	8	18	6	6	3	47	33	39	25	22	26
TOR4A	NC_040063.1	1915757	1917254	peak_18643	1498	+	-0.0230180247139	1.0	60.6109510086	peak_13856|peak_14495	cds	rna-XM_005027519.4	781	1129	927	486	442	297	1476	1302	1479	833	447	669
SELENON	NW_020865184.1	24732	25122	peak_3488	391	-	-0.0230962259249	1.0	60.6109510086	peak_18375|peak_19200	utr3	rna-XM_027447417.1	707	1346	1013	567	793	535	1280	1507	1155	818	844	750
PDE6H	NC_040046.1	159023646	159023707	peak_12365	62	-	0.0230962259249	1.0	60.6109510086	peak_2351|NA	cds	rna-XM_005024558.4	10	15	20	14	16	1	28	17	11	24	0	13
c4096d48-d1ad-442f-ab30-40df5067abae	NC_040047.1	45442341	45442464	peak_8534	124	-	-0.0230962259249	1.0	60.6109510086	NA|peak_3958,peak_3960	NP_exon	c4096d48-d1ad-442f-ab30-40df5067abae.trans	19	64	85	16	37	36	39	67	55	30	41	11
DUSP7	NC_040058.1	16557696	16557905	peak_1510	210	+	0.976903774075	1.0	60.6109510086	peak_12112|peak_12671	utr3	rna-XM_027467639.1	504	1080	838	489	464	364	1288	1360	1923	1136	694	1176
ADAMTS10	NC_040065.1	266149	266479	peak_4254	331	-	-0.0230180247139	1.0	60.6109510086	peak_14932|peak_15604	utr3	rna-XM_021278512.2	129	217	232	84	90	88	612	739	680	386	313	296
FAM135A	NC_040048.1	87490784	87491055	peak_15612	272	-	-0.0230962259249	1.0	60.6109510086	peak_5701|peak_5961	cds	rna-XM_027455026.1	242	340	305	180	219	128	262	379	311	221	184	190
CBLB	NC_040046.1	113164282	113173701	peak_11382	9420	+	-0.0230962259249	1.0	60.6109510086	peak_579|peak_618	cds	rna-XM_027449518.1	318	438	368	282	311	222	450	510	371	318	371	227
ORMDL3	NC_040073.1	3564822	3565062	peak_3627	241	-	-0.0230962259249	1.0	60.6109510086	peak_17276|peak_18039	utr3	rna-XM_027445252.1	277	749	686	309	496	293	651	802	867	523	444	559
NDUFAF8	NC_040064.1	156521	156581	peak_1719	61	+	1.02309622592	0.622022411019	249.822057759	peak_14249|NA	utr3	rna-XM_027471324.1	58	118	99	24	53	94	94	130	143	89	24	56
EPB41	NC_040069.1	3574529	3574889	peak_4121	361	+	-0.0230962259249	1.0	60.6109510086	peak_16258|peak_16987	cds	rna-XM_027443971.1	572	808	590	563	250	444	634	714	548	455	201	459
JCHAIN	NC_040049.1	15558097	15558216	peak_19605	120	+	-0.851430024252	0.332560277233	652.21185464	NA|peak_6244	utr3	rna-XM_005031313.3	9	18	19	4	35	5	7	12	4	13	17	10
MPZL1	NC_040046.1	108360992	108361966	peak_11333	975	+	-0.0230167670511	1.0	60.6109510086	NA|peak_603	utr5	rna-XM_005017597.4	397	761	521	345	383	303	680	836	750	644	464	616
IFT81	NC_040061.1	12030566	12036816	peak_20979	6251	-	-1.02309622592	0.622022411019	249.822057759	peak_13748|peak_14389	cds	rna-XM_005028184.4	199	364	295	184	207	123	569	712	524	392	345	283
BAZ2B	NC_040050.1	4327861	4329461	peak_6408	1601	-	-0.0230962259249	1.0	60.6109510086	peak_7638|peak_7985	cds	rna-XM_021277560.2	268	559	388	198	242	183	414	636	573	280	246	312
SLC12A8	NC_040052.1	27680249	27680400	peak_5584	152	+	-0.0230974879642	1.0	60.6109510086	NA|peak_9423	cds	rna-XM_027461049.1	30	47	15	16	17	8	25	79	64	17	33	18
SEMA3A	NC_040046.1	193896191	193898977	peak_12821	2787	-	-0.0230180247139	1.0	60.6109510086	peak_2554|peak_2685	utr3	rna-XM_027460075.1	1459	2876	2386	897	1229	872	3062	3999	3342	1606	1481	1545
MAPK8	NC_040051.1	19244660	19249155	peak_3212	4496	-	-0.0230962259249	1.0	60.6109510086	peak_8569|peak_8975	cds	rna-XM_027459984.1	253	512	443	224	297	195	337	521	466	254	236	294
PARP1	NC_040048.1	21229924	21238938	peak_14687	9015	+	-0.0230962259249	1.0	60.6109510086	peak_4502|peak_4719	cds	rna-XM_027453687.1	5736	11780	8833	4244	5996	3773	10595	13852	10483	7519	6301	5554
USP31	NC_040060.1	738962	739233	peak_13062	272	-	0.561944476007	1.0	60.6109510086	peak_13106|peak_13702	cds	rna-XM_027468908.1	63	210	141	45	68	40	124	176	219	69	76	87
SLC6A12	NC_040046.1	139987258	139987349	peak_11933	92	+	-0.0230962259249	1.0	60.6109510086	NA|peak_835	utr3	rna-XM_005011462.4	4	17	12	6	10	9	13	16	11	1	15	9
E2F4	NC_040056.1	18554867	18554987	peak_614	121	-	-0.0230962259249	1.0	60.6109510086	peak_11617|peak_12134	cds	rna-XM_027466327.1	113	214	181	117	71	84	251	266	332	114	125	154
LRRTM2	NC_040059.1	14724587	14724738	peak_17290	152	+	-0.0230949640235	1.0	60.6109510086	NA|peak_13210	utr3	rna-XM_013104524.3	239	377	273	9	487	327	244	326	262	366	328	9
AJAP1	NC_040067.1	6716985	6717166	peak_16307	182	-	-0.0230167670511	1.0	60.6109510086	NA|peak_16752	cds	rna-XM_027443408.1	9	12	5	3	10	5	14	15	10	18	10	0
FAM13B	NC_040059.1	6309505	6311047	peak_16972	1543	-	-0.0230962259249	1.0	60.6109510086	peak_12696|peak_13273	cds	rna-XM_027468478.1	1085	1622	1744	925	1082	799	1360	1394	1269	1158	673	669
HSF1	NC_040047.1	155196362	155196719	peak_9670	358	-	-0.0230974879642	1.0	60.6109510086	peak_4298|peak_4500	utr3	rna-XM_027452840.1	859	1517	1296	554	629	479	1468	1660	1732	667	546	766
SF3A1	NC_040061.1	9906656	9906897	peak_20892	242	-	-0.0230962259249	1.0	60.6109510086	peak_13703|peak_14348	utr3	rna-XM_027469880.1	1530	2866	2333	1148	1539	1067	2859	3676	3165	1842	1827	1795
CD58	NC_040046.1	119310404	119316789	peak_11489	6386	-	-0.0230962259249	1.0	60.6109510086	peak_1948,peak_1946,peak_1947|peak_2054,peak_2053	utr3	rna-XM_027444000.1	784	1576	1281	642	982	624	1329	1616	1414	987	747	911
ABL1	NC_040063.1	7428227	7429094	peak_18835	868	-	-0.0230962259249	1.0	60.6109510086	peak_14156|peak_14807	utr3	rna-XM_027471158.1	2074	3467	3170	1529	1725	1348	3346	4206	3205	1892	1866	1818
HSP90B1	NC_040046.1	145562256	145563096	peak_12035	841	+	-0.0230167670511	1.0	60.6109510086	peak_804|peak_870	cds	rna-XM_027449454.1	4283	8946	6354	4168	5878	4042	9293	11155	9406	8824	7396	7287
ZBTB24	NC_040048.1	70510858	70510979	peak_15409	122	+	1.02309622592	0.622022411019	249.822057759	peak_4860|NA	utr3	rna-XM_027454727.1	23	72	27	8	47	19	70	94	51	30	36	37
MSI1	NC_040061.1	7445211	7445272	peak_20797	62	+	0.0231744228972	1.0	60.6109510086	peak_13467|NA	utr3	rna-XM_027469864.1	293	531	376	415	285	320	551	710	633	357	402	350
C1S	NC_040046.1	121936691	121936841	peak_11626	151	+	-1.02317568918	0.622012251195	633.83074332	NA|peak_719	cds	rna-XM_005016768.4	20	45	24	28	7	31	54	56	30	12	24	23
NOC4L	NC_040061.1	2613983	2614403	peak_20615	421	+	0.976903774075	1.0	60.6109510086	peak_13390|peak_14016	utr3	rna-XM_027470023.1	247	462	372	176	236	169	430	655	468	264	334	308
97717df5-85c9-409c-b480-491de14099c4	NC_040048.1	51692345	51692436	peak_15164	92	+	-2.70136450635	3.66175213858e-06	0.0476315308363	NA|peak_4973	NP_exon	97717df5-85c9-409c-b480-491de14099c4.trans	5	4	4	9	15	3	19	24	21	2	11	10
CIR1	NC_040052.1	21889675	21892189	peak_5462	2515	+	-0.0230974879642	1.0	60.6109510086	peak_8971|peak_9356	utr3	rna-XM_005019704.3	2731	5774	4873	1620	2349	1658	6833	7895	6535	3781	2553	2691
OBSCN	NC_040047.1	2599429	2599520	peak_7893	92	+	-0.0230962259249	1.0	60.6109510086	peak_2688|peak_2823	cds	rna-XM_027450316.1	359	637	541	424	440	339	119	147	146	116	69	106
PHACTR4	NC_040069.1	3291687	3291778	peak_4096	92	+	-0.0230167670511	1.0	60.6109510086	peak_16246|peak_16976	cds	rna-XM_027444017.1	186	234	172	120	146	79	147	161	169	108	117	126
AKAP5	NC_040050.1	11821290	11821443	peak_6600	154	+	-1.0231744229	0.622012413086	551.406443858	NA|peak_7356,peak_7352	utr3	rna-XM_027458023.1	2	23	5	8	13	4	19	27	14	16	8	4
DLC1	NC_040049.1	47396661	47397382	peak_20108	722	+	-0.0230180247139	1.0	60.6109510086	peak_6202|peak_6461	cds	rna-XM_005012729.4	387	822	673	262	351	255	736	1081	961	475	409	468
UCN3	NC_040046.1	201449046	201449107	peak_12905	62	+	-1.0231744229	0.622012413086	551.406443858	NA|peak_1275	utr3	rna-XM_005014551.4	6	103	83	76	46	57	22	119	151	28	12	112
RBM12B	NC_040047.1	132085766	132086306	peak_9425	541	-	-0.0230962259249	1.0	60.6109510086	peak_4158|peak_4357	cds	rna-XM_027452465.1	687	1122	867	477	549	378	1096	1238	886	633	514	558
BICD1	NC_040046.1	141021234	141021804	peak_11966	571	+	-0.0230180247139	1.0	60.6109510086	peak_773,peak_774|peak_842	cds	rna-XM_027471489.1	84	204	137	41	89	51	105	141	193	66	74	81
PTGFRN	NC_040046.1	107793760	107795465	peak_11308	1706	-	0.561865012757	1.0	60.6109510086	peak_1845|peak_1953	utr3	rna-XM_027449368.1	1664	3410	2501	786	1062	775	1784	2206	2053	748	767	863
ZADH2	NC_040047.1	95929768	95930306	peak_9015	539	+	-0.0230962259249	1.0	60.6109510086	peak_3180|peak_3319	cds	rna-XM_027451887.1	572	917	723	375	448	300	1123	974	1201	558	335	604
FNIP1	NC_040059.1	3884141	3884352	peak_16915	212	+	-0.0230962259249	1.0	60.6109510086	peak_12458|peak_13023	cds	rna-XM_021266729.2	190	355	302	146	211	153	404	397	362	262	221	312
BAP1	NC_040058.1	18586246	18587320	peak_1561	1075	+	-0.0230962259249	1.0	60.6109510086	peak_12135|peak_12687	cds	rna-XM_027467870.1	875	1580	1257	798	965	773	1503	1762	1647	1046	1026	1314
TULP1	NC_040072.1	4835973	4836379	peak_9936	407	+	-0.0230167670511	1.0	60.6109510086	NA|peak_17625	cds	rna-XM_027444905.1	88	135	85	38	96	79	46	146	36	73	57	84
LOC101792441	NC_040062.1	955199	955735	peak_13035	537	+	-0.0230974879642	1.0	60.6109510086	peak_13794,peak_13792|peak_14432,peak_14431	utr3	rna-XM_027470479.1	356	696	521	205	262	259	688	856	781	358	290	331
FTO	NC_040057.1	19117515	19165214	peak_19352	47700	+	-0.0230180247139	1.0	60.6109510086	peak_11838|peak_12370	cds	rna-XM_027467172.1	101	169	110	49	62	51	190	232	133	143	104	69
FOXN3	NC_040050.1	22108613	22108913	peak_6826	301	+	-0.0230962259249	1.0	60.6109510086	peak_7146|peak_7476	utr3	rna-XM_027459042.1	403	854	652	370	507	268	811	867	806	675	493	568
PCNT	NC_040052.1	15957770	15957831	peak_5258	62	+	-0.0230167670511	1.0	60.6109510086	NA|peak_9226	cds	rna-XM_027461016.1	127	197	132	102	128	53	152	200	180	179	121	88
LOC101790506	NC_040072.1	931371	931462	peak_9749	92	+	-1.02309622592	0.622022411019	249.822057759	NA|peak_17532	NP_exon	rna-XR_003492563.1	53	138	59	49	69	46	77	78	72	47	40	44
LOC101804602	NC_040065.1	11347475	11349728	peak_4916	2254	+	-0.976903774075	1.0	60.6109510086	NA|peak_15581	cds	rna-XM_027472269.1	99	120	305	109	41	123	168	232	347	119	124	194
NDUFV2	NC_040047.1	106750689	106750779	peak_9128	91	+	-0.0231744228972	1.0	60.6109510086	NA|peak_3364	utr3	rna-XM_027452048.1	175	236	205	146	262	130	154	199	167	125	130	114
ZFYVE19	NC_040050.1	37016326	37016686	peak_7201	361	+	-0.0230962259249	1.0	60.6109510086	peak_7326|peak_7659	utr3	rna-XM_027458172.1	187	396	399	129	199	154	303	470	444	193	182	199
PRRC1	NC_040075.1	47115572	47115781	peak_17950	210	-	-0.0230962259249	1.0	60.6109510086	peak_18204|peak_19034	cds	rna-XM_021272372.2	655	1099	957	592	739	520	1116	1423	1046	978	770	716
GSPT1	NC_040060.1	10032149	10033433	peak_13424	1285	-	0.0230167670511	1.0	60.6109510086	peak_13270|NA	cds	rna-XM_027469502.1	863	1586	1263	817	1151	799	1751	2094	1712	1624	1373	1379
GATD1	NC_040050.1	34754605	34754694	peak_7095	90	+	0.0230962259249	1.0	60.6109510086	peak_7271|NA	utr3	rna-XM_027458396.1	46	70	70	37	44	44	78	66	110	45	62	46
RIOX1	NC_040050.1	39156762	39157090	peak_7316	329	-	-0.0230962259249	1.0	60.6109510086	peak_7992|peak_8367	cds	rna-XM_005021698.3	277	497	347	252	322	208	771	822	684	554	458	495
KIAA2026	NC_040075.1	27986734	27987334	peak_17761	601	-	-1.02309622592	0.622022411019	249.822057759	peak_18110|peak_18927	cds	rna-XM_027446137.1	272	526	455	232	325	199	411	509	429	254	184	225
DUSP27	NC_040046.1	108091730	108092301	peak_11324	572	+	-0.0230180247139	1.0	60.6109510086	peak_560|peak_594	utr3	rna-XM_005017621.4	895	1513	1298	559	679	451	391	466	414	306	173	202
PTGES3L	NC_040073.1	4463947	4464452	peak_3690	506	+	0.0230167670511	1.0	60.6109510086	peak_17128|NA	cds	rna-XM_027445615.1	742	990	1020	889	578	539	950	1604	1140	892	921	1143
LOC101797824	NC_040046.1	65918509	65918809	peak_10799	301	+	-0.0230962259249	1.0	60.6109510086	NA|peak_347	cds	rna-XM_027446184.1	100	175	234	115	110	94	275	328	358	172	174	238
ST3GAL1	NC_040047.1	148476618	148476709	peak_9609	92	-	-1.02309622592	0.622022411019	249.822057759	NA|peak_4463	utr3	rna-XM_027452733.1	317	624	337	260	326	153	314	347	431	212	163	238
TCF20	NC_040046.1	160448384	160448955	peak_12414	572	+	-0.0230962259249	1.0	60.6109510086	peak_986|peak_1069	cds	rna-XM_027453750.1	1350	2376	2004	995	1339	1068	2233	2746	2215	1777	1467	1477
PDSS1	NC_040047.1	16964070	16964309	peak_8126	240	-	-0.0230962259249	1.0	60.6109510086	peak_3612|peak_3766	utr3	rna-XM_021275467.2	230	306	301	190	158	170	191	270	292	177	139	173
ARMH4	NC_040050.1	9183057	9183329	peak_6526	273	-	-0.0230962259249	1.0	60.6109510086	peak_7683,peak_7682|peak_8039,peak_8037	utr3	rna-XM_027457923.1	78	70	53	49	20	31	426	500	539	282	212	313
LOC101794283	NC_040051.1	33125525	33126885	peak_3446	1361	-	-0.0230180247139	1.0	60.6109510086	peak_8666|peak_9068	cds	rna-XM_013092011.3	69	117	56	41	33	20	92	122	98	55	56	41
RALGAPA1	NC_040050.1	30348304	30348971	peak_6962	668	+	0.0230167670511	1.0	60.6109510086	peak_7208|NA	cds	rna-XM_027459336.1	147	253	201	114	188	120	196	219	211	208	190	181
TBC1D12	NC_040051.1	17108283	17113617	peak_3170	5335	-	-0.0230962259249	1.0	60.6109510086	peak_8548|peak_8958	cds	rna-XM_027460583.1	1263	2225	1989	988	1616	922	2431	2799	2286	2021	1356	1423
SPOCK1	NC_040059.1	6102004	6103357	peak_16966	1354	+	-0.0230962259249	1.0	60.6109510086	NA|peak_13057	utr3	rna-XM_005018686.4	228	384	179	126	217	76	485	771	614	336	305	348
EPS15L1	NC_040065.1	3189561	3191821	peak_4400	2261	-	-0.0230962259249	1.0	60.6109510086	peak_14998,peak_14999|peak_15673	cds	rna-XM_027472004.1	292	600	463	218	372	229	530	614	573	376	318	330
AP3D1	NC_040065.1	658157	666096	peak_4269	7940	+	-0.0230180247139	1.0	60.6109510086	peak_14581|peak_15255	cds	rna-XM_027471757.1	4186	8842	7068	2691	3680	2531	9743	10340	9171	5664	3618	3976
RNF182	NC_040047.1	51262727	51262848	peak_8609	122	-	-1.60821638687	0.371025736657	644.376431641	NA|peak_3991	cds	rna-XM_027451250.1	7	0	5	7	0	6	20	24	15	7	5	8
UBR3	NC_040052.1	23555490	23558797	peak_5488	3308	-	-0.0230962259249	1.0	60.6109510086	peak_9298|peak_9693	cds	rna-XM_027462190.1	255	432	385	218	316	176	346	437	318	269	207	272
SIRT3	NC_040050.1	35821714	35821804	peak_7153	91	+	-1.02309622592	0.622022411019	249.822057759	NA|peak_7625	utr3	rna-XM_005030195.2	102	113	68	72	61	42	89	129	123	49	55	56
FGF2	NC_040049.1	42963349	42963440	peak_19984	92	-	-1.02309622592	0.622022411019	249.822057759	NA|peak_6916	cds	rna-XM_027456827.1	46	95	78	37	84	34	109	135	95	61	45	70
GPC3	NC_040055.1	13401246	13401307	peak_16731	62	-	-1.46374625458	0.018306013659	81.0275981763	NA|peak_11405	utr3	rna-XM_027465217.1	0	1	10	6	1	10	31	34	45	13	27	26
LASP1	NC_040073.1	3838681	3838772	peak_3651	92	-	-0.0230962259249	1.0	60.6109510086	NA|peak_18053	utr3	rna-XM_027445216.1	426	720	625	436	538	458	846	1155	1028	787	669	696
DCP2	NC_040075.1	57310065	57312541	peak_18061	2477	+	0.0230167670511	1.0	60.6109510086	peak_17820|NA	cds	rna-XM_027446648.1	167	266	198	92	202	111	244	327	290	290	204	222
SETD1B	NC_040061.1	12322898	12323109	peak_20993	212	+	0.562022681457	1.0	60.6109510086	peak_13542|peak_14179	utr5	rna-XM_027469684.1	35	64	48	18	11	13	32	47	40	15	19	31
HPD	NC_040061.1	12375181	12375509	peak_21003	329	-	-1.78464850374	0.179759849292	444.093754045	NA|peak_14398	cds	rna-XM_027469662.1	5	36	29	4	1	5	17	12	27	8	10	6
MON2	NC_040046.1	168370784	168371115	peak_12558	332	-	-0.608059988685	0.685029977553	239.444841452	peak_2433|peak_2555	cds	rna-XM_027456469.1	156	369	257	91	144	93	328	377	326	130	108	122
APLNR	NC_040050.1	57878884	57879033	peak_7653	150	-	-0.0230962259249	1.0	60.6109510086	peak_8129|peak_8512	cds	rna-XM_013110112.2	460	581	683	468	307	436	502	512	490	263	308	346
POLQ	NC_040046.1	120034717	120034898	peak_11516	182	-	-1.6081381899	0.371038958738	572.626096768	NA|peak_2066	cds	rna-XM_027449661.1	19	34	23	21	28	3	27	31	45	12	8	14
LOC101794979	NC_040054.1	23994191	23994578	peak_14184	388	-	0.0230167670511	1.0	60.6109510086	peak_10565|NA	cds	rna-XM_027463916.1	85	163	133	70	111	79	117	173	154	158	103	123
CCNA2	NC_040049.1	43367726	43368358	peak_19995	633	+	-0.0230962259249	1.0	60.6109510086	peak_6149|peak_6412	cds	rna-XM_005015540.4	1427	3221	2265	1554	1673	1293	3908	4871	4185	3048	2740	2841
SLC22A31	NC_040056.1	20433199	20433289	peak_738	91	-	1.02309622592	0.622022411019	249.822057759	peak_11673|NA	cds	rna-XM_027466386.1	49	225	106	90	59	81	45	188	117	23	118	59
OBSCN	NC_040047.1	2550213	2550274	peak_7889	62	+	0.0230167670511	1.0	60.6109510086	peak_2683|NA	cds	rna-XM_027450316.1	303	532	500	316	349	282	108	139	119	101	78	95
PTPRT	NC_040066.1	3973607	3973937	peak_5888	331	+	-0.0230962259249	1.0	60.6109510086	peak_15301|peak_15986	utr3	rna-XM_027442958.1	1298	2496	1926	826	1266	733	773	1267	948	581	510	516
AGO3	NC_040069.1	1341271	1341392	peak_3990	122	+	-0.0230962259249	1.0	60.6109510086	peak_16202|peak_16925	utr3	rna-XM_027444011.1	135	216	169	107	137	66	181	250	243	175	119	174
MTA3	NC_040048.1	39380024	39380084	peak_14974	61	-	-3.02365256061	0.0205176696735	89.2672353389	NA|peak_5690	utr3	rna-XM_027454130.1	7	14	3	4	8	5	4	6	5	0	2	0
GABPB2	NC_040071.1	791305	792598	peak_899	1294	+	-0.0230962259249	1.0	60.6109510086	peak_16657|peak_17408	utr3	rna-XM_027444468.1	1037	2128	1841	756	1012	828	2157	2149	1979	1461	946	1049
ASAP1	NC_040047.1	146867119	146873684	peak_9590	6566	-	-0.0230962259249	1.0	60.6109510086	peak_4251|peak_4451,peak_4452	utr3	rna-XM_027452712.1	363	610	579	294	411	281	935	968	801	660	556	505
PPP1R12B	NC_040072.1	2824824	2825394	peak_9831	571	-	-0.0230962259249	1.0	60.6109510086	peak_16947|peak_17697	utr3	rna-XM_027444963.1	1824	2597	2993	1599	1946	1393	1680	2779	1942	1184	1281	1242
RTCA	NC_040053.1	33406454	33406902	peak_2792	449	-	0.0230167670511	1.0	60.6109510086	peak_10035|NA	cds	rna-XM_027463041.1	80	141	117	49	88	58	174	205	156	130	128	147
USP8	NC_040056.1	10538334	10539859	peak_306	1526	+	-0.0230167670511	1.0	60.6109510086	peak_11100|peak_11580	cds	rna-XM_027466332.1	201	326	248	187	237	160	304	329	320	282	211	210
CD81	NC_040050.1	32688933	32689475	peak_7012	543	+	-0.0230962259249	1.0	60.6109510086	peak_7229|peak_7555	utr3	rna-XM_027458509.1	7262	13469	11296	6086	5498	4654	5773	6170	6029	4126	2818	3270
SYNE3	NC_040050.1	19211712	19211833	peak_6746	122	+	-0.0230962259249	1.0	60.6109510086	peak_7100|peak_7422	utr3	rna-XM_027459383.1	22	23	37	10	11	21	22	16	17	7	6	14
CNTN1	NC_040046.1	172521338	172521518	peak_12603	181	-	0.976903774075	1.0	60.6109510086	peak_2451|NA	utr3	rna-XM_027457131.1	78	103	87	54	40	39	22	14	39	18	18	8
ADPRHL1	NC_040046.1	61231646	61233013	peak_10705	1368	-	-0.0230962259249	1.0	60.6109510086	peak_1557|peak_1658	cds	rna-XM_027444501.1	2540	2074	2458	1598	888	921	567	1300	557	385	498	293
SLC25A30	NC_040046.1	29077485	29077605	peak_10486	121	-	-0.391982389015	0.663829741625	252.154327224	NA|peak_1552	utr3	rna-XM_005026212.4	42	111	22	66	76	21	23	16	21	24	7	41
CNST	NC_040048.1	28865724	28873003	peak_14807	7280	+	-0.0230180247139	1.0	60.6109510086	peak_4562|peak_4782	cds	rna-XM_027453864.1	132	186	268	77	109	75	283	313	269	179	99	133
LOC101801879	NC_040073.1	5345125	5345486	peak_3778	362	-	0.561944476007	1.0	60.6109510086	peak_17341|peak_18111	cds	rna-XM_027445452.1	48	148	94	45	30	34	3012	2262	1271	1987	717	609
PXDN	NC_040048.1	98791084	98791325	peak_15714	242	-	0.976903774075	1.0	60.6109510086	peak_5756|peak_6005	cds	rna-XM_027455161.1	683	1544	1061	505	786	565	1377	1780	1425	973	946	822
PNOC	NC_040048.1	116498382	116498503	peak_15924	122	+	-1.0231744229	0.622012413086	551.406443858	NA|peak_5320	utr3	rna-XM_027455450.1	256	383	325	310	320	258	48	79	57	24	30	28
UST	NC_040048.1	50469542	50469722	peak_15126	181	+	-0.0230167670511	1.0	60.6109510086	NA|peak_4942	cds	rna-XM_027454344.1	42	128	49	54	48	59	153	205	174	122	169	118
LOC101789439	NC_040067.1	5159449	5160439	peak_16246	991	-	-0.0230962259249	1.0	60.6109510086	peak_16012|peak_16711	cds	rna-XM_027443081.1	549	1291	872	439	728	431	600	738	610	465	358	365
MEGF11	NC_040056.1	2272903	2273054	peak_112	152	+	1.02317568918	0.622012251195	633.83074332	peak_11012|NA	utr5	rna-XM_021269498.2	8	6	14	1	0	17	13	10	11	2	8	4
ZYX	NC_040046.1	122145738	122145798	peak_11636	61	-	0.0230167670511	1.0	60.6109510086	peak_2025|NA	cds	rna-XM_013096552.3	433	749	659	409	521	401	631	869	690	517	557	591
SCN4A	NC_040073.1	887032	887093	peak_3508	62	+	1.71129347896	0.000983357217015	7.16316462348	peak_17031|NA	NP_exon	rna-XR_003492712.1	50	16	16	56	7	36	32	84	78	20	15	41
SH3TC1	NC_040049.1	65459604	65459845	peak_20362	242	+	-1.02317568918	0.622012251195	633.83074332	NA|peak_6578	cds	rna-XM_005016196.4	49	48	45	39	38	19	26	36	34	11	15	12
MCM8	NC_040048.1	15384636	15385025	peak_14521	390	-	-0.0230987501415	1.0	60.6109510086	peak_5255|peak_5507	utr5	rna-XM_005019111.4	23	58	54	24	9	12	80	85	82	24	16	34
EXOC8	NC_040048.1	41701841	41702082	peak_15022	242	+	-0.0230962259249	1.0	60.6109510086	peak_4660|peak_4883	cds	rna-XM_027454162.1	145	238	152	89	102	97	217	254	355	143	145	152
DLK2	NC_040048.1	32005096	32005427	peak_14862	332	-	-0.0230962259249	1.0	60.6109510086	peak_5403|peak_5637	utr3	rna-XM_027453945.1	464	950	687	353	464	338	859	1343	1114	531	444	498
CHD4	NC_040046.1	121588939	121589279	peak_11583	341	-	-0.0230962259249	1.0	60.6109510086	peak_2004|peak_2108	cds	rna-XM_027449741.1	1636	3307	3078	1609	2024	1667	3336	3978	3511	2585	2101	2362
H6PD	NC_040067.1	4259142	4259322	peak_16198	181	-	0.0230167670511	1.0	60.6109510086	peak_15992|NA	utr3	rna-XM_027443191.1	12	24	10	18	6	6	21	30	38	23	8	37
SRGAP2	NC_040072.1	624177	624508	peak_9724	332	+	-0.0230180247139	1.0	60.6109510086	peak_16773|peak_17517	utr3	rna-XM_005011745.3	347	672	458	197	287	196	553	639	526	298	260	298
ERICH1	NC_040048.1	97231884	97232005	peak_15711	122	+	1.9772178493	0.37504538695	569.162414887	peak_4992|NA	utr3	rna-XM_027455148.1	2	4	6	2	1	0	0	6	0	5	1	0
GTPBP2	NC_040048.1	32120224	32122513	peak_14877	2290	-	-0.0230962259249	1.0	60.6109510086	peak_5408,peak_5409|peak_5643	cds	rna-XM_027453970.1	1193	1715	1529	946	987	626	1051	1123	958	732	573	567
PGRMC1	NC_040055.1	7061333	7061394	peak_16588	62	-	-0.0230974879642	1.0	60.6109510086	peak_10850|peak_11324	cds	rna-XM_027465276.1	111	255	151	60	101	70	333	316	386	146	125	147
LOC101803508	NC_040050.1	52585270	52587144	peak_7560	1875	-	-0.0230962259249	1.0	60.6109510086	peak_8096|peak_8477	cds	rna-XM_027458895.1	315	667	482	231	395	218	407	426	523	344	184	272
PLOD1	NC_040067.1	2929622	2929773	peak_16141	152	-	-0.0231744228972	1.0	60.6109510086	NA|peak_16661	utr3	rna-XM_005021300.4	205	345	266	200	317	217	419	424	405	351	249	269
DLG2	NC_040046.1	6079147	6079298	peak_10159	152	-	-0.0230962259249	1.0	60.6109510086	peak_1298|peak_1385	utr3	rna-XM_027462540.1	257	359	390	256	215	194	130	212	155	115	107	92
FNDC1	NC_040048.1	48183883	48184123	peak_15090	241	-	-0.0230962259249	1.0	60.6109510086	peak_5509|peak_5748	cds	rna-XM_027454290.1	6163	18240	12204	5238	11014	6002	9466	11436	8306	7715	5540	5389
DYM	NC_040075.1	2094301	2094653	peak_17398	353	+	-1.02309622592	0.622022411019	249.822057759	peak_17505,peak_17504|peak_18290,peak_18289	utr3	rna-XM_027446285.1	107	326	277	135	141	140	284	333	287	141	197	167
STAT1	NC_040052.1	8145467	8145708	peak_5108	242	+	-0.0230962259249	1.0	60.6109510086	peak_8764|peak_9159	utr3	rna-XM_027460934.1	262	489	340	172	237	150	480	675	392	292	324	183
LOC101790225	NC_040049.1	25969158	25969219	peak_19774	62	+	-1.0231744229	0.622012413086	551.406443858	NA|peak_6323	utr3	rna-XM_027456220.1	3	4	3	6	1	2	4	5	14	8	3	1
NOTCH1	NC_040063.1	8684978	8685706	peak_18920	729	+	-0.0230962259249	1.0	60.6109510086	peak_13977,peak_13979|peak_14616,peak_14617	utr3	rna-XM_027471123.1	1134	1883	1675	738	753	735	1665	1744	2101	878	690	943
EFNB2	NC_040046.1	57569151	57569332	peak_10648	182	-	-0.0230962259249	1.0	60.6109510086	peak_1526|peak_1632	utr3	rna-XM_013099976.3	228	392	415	227	229	251	558	561	506	448	300	325
BSN	NC_040058.1	15936029	15936300	peak_1485	272	-	-0.0230962259249	1.0	60.6109510086	peak_12312|peak_12877	cds	rna-XM_027467254.1	258	301	448	173	144	257	390	501	364	331	264	295
RNF126	NC_040065.1	5024939	5025029	peak_4556	91	+	0.976983232949	1.0	60.6109510086	peak_14732|peak_15407	utr3	rna-XM_027472540.1	83	129	136	40	67	82	89	189	120	97	121	101
e3138c06-1d9c-4aea-a4cd-691052c25586	NC_040051.1	32130336	32130545	peak_3400	210	-	-0.0230962259249	1.0	60.6109510086	NA|peak_9050,peak_9049	NP_exon	e3138c06-1d9c-4aea-a4cd-691052c25586.trans	150	331	214	192	172	152	99	167	123	88	76	97
GLI3	NC_040047.1	57735156	57736715	peak_8671	1560	+	-1.02309622592	0.622022411019	249.822057759	peak_3038|peak_3165	cds	rna-XM_027451339.1	108	155	127	63	112	69	414	623	490	216	316	273
NTNG1	NC_040053.1	31359985	31360285	peak_2773	301	-	-0.0230962259249	1.0	60.6109510086	peak_10027|peak_10479	utr3	rna-XM_027463285.1	354	736	544	262	356	252	325	356	371	155	152	176
NEMF	NC_040050.1	6874236	6877370	peak_6441	3135	-	-0.0230962259249	1.0	60.6109510086	peak_7651|peak_7999	cds	rna-XM_027459538.1	6091	10410	10033	4053	4740	4109	9843	12200	11705	6126	4878	6058
PCSK1	NC_040075.1	76889326	76889416	peak_18252	91	-	-4.72552246809	1.78272532095e-07	0.00329357087617	NA|peak_19180	cds	rna-XM_027446812.1	17	6	7	11	10	4	16	19	10	2	0	0
LOC106018497	NC_040047.1	17109819	17110059	peak_8128	241	+	-0.0230180247139	1.0	60.6109510086	peak_2798|peak_2924	cds	rna-XM_027450615.1	73	126	153	47	55	43	89	147	100	60	52	49
FAM171B	NC_040052.1	9628470	9628593	peak_5141	124	-	-1.02309622592	0.622022411019	249.822057759	NA|peak_9572,peak_9569	cds	rna-XM_027460990.1	10	18	24	7	9	14	34	47	36	22	18	18
BDP1	NC_040075.1	62949232	62953384	peak_18121	4153	+	-0.0230180247139	1.0	60.6109510086	peak_17847|peak_18656	cds	rna-XM_027447084.1	388	845	663	236	403	235	967	1177	1098	698	507	586
RNLS	NC_040051.1	29534954	29535315	peak_3375	362	+	-0.0230962259249	1.0	60.6109510086	peak_8382|peak_8777	cds	rna-XM_027460201.1	141	229	157	143	124	91	243	453	317	198	267	198
EXOC4	NC_040046.1	200871378	200888549	peak_12897	17172	+	-0.0230962259249	1.0	60.6109510086	peak_1189|peak_1268	cds	rna-XM_027461261.1	197	336	345	154	218	175	375	434	392	284	256	320
PSEN1	NC_040050.1	39352796	39355349	peak_7328	2554	-	-0.0230962259249	1.0	60.6109510086	peak_8000|peak_8376	cds	rna-XM_027458177.1	319	614	517	233	358	254	641	772	699	458	443	402
SIPA1L2	NC_040048.1	41196329	41196510	peak_15011	182	+	0.976903774075	1.0	60.6109510086	peak_4657|NA	utr3	rna-XM_027453266.1	10	9	6	12	0	0	4	3	2	5	1	0
MXD4	NC_040049.1	67632341	67633746	peak_20403	1406	+	-0.0230962259249	1.0	60.6109510086	peak_6313|peak_6592	utr3	rna-XM_027455649.1	699	1318	1033	500	707	522	926	915	764	590	411	464
ATRX	NC_040055.1	4981514	4981575	peak_16491	62	-	-0.0230167670511	1.0	60.6109510086	NA|peak_11287	cds	rna-XM_027464969.1	415	832	664	396	520	367	627	1019	573	762	541	421
HIPK1	NC_040072.1	347218	347668	peak_9709	451	-	-1.02309622592	0.622022411019	249.822057759	peak_16915|peak_17661	utr3	rna-XM_027445131.1	409	626	525	263	332	304	701	897	949	423	448	515
JADE3	NC_040046.1	68584220	68584311	peak_10849	92	+	-0.0231744228972	1.0	60.6109510086	NA|peak_372	cds	rna-XM_021273537.2	88	126	84	80	114	68	125	194	164	93	108	91
LOC101793065	NC_040049.1	6213668	6213953	peak_19475	286	-	-0.0230974879642	1.0	60.6109510086	peak_6414,peak_6415|peak_6691,peak_6692	utr3	rna-XM_027455989.1	792	1580	1416	516	591	454	684	917	1074	370	324	471
AKAP6	NC_040050.1	48884791	48885061	peak_7487	271	+	-1.02309622592	0.622022411019	249.822057759	peak_7454|peak_7800	cds	rna-XM_021274501.2	370	680	431	267	398	217	164	230	153	109	97	93
LOC101801977	NC_040048.1	5877346	5877826	peak_14368	481	+	-0.0230180247139	1.0	60.6109510086	peak_4374|peak_4582	utr3	rna-XM_027453253.1	706	1334	974	492	514	394	909	1288	1208	533	532	557
ZNFX1	NC_040066.1	15832042	15833287	peak_6302	1246	+	-0.0230180247139	1.0	60.6109510086	peak_15497|peak_16180	cds	rna-XM_027472864.1	671	1156	985	440	531	337	1127	1140	1137	699	477	674
SLC25A48	NC_040059.1	5372668	5372849	peak_16959	182	+	-0.0230180247139	1.0	60.6109510086	peak_12486|peak_13051	utr3	rna-XM_027468564.1	149	515	504	67	222	221	54	106	98	38	44	55
GTPBP10	NC_040047.1	23122475	23124009	peak_8203	1535	+	-0.0230962259249	1.0	60.6109510086	peak_2828|peak_2948,peak_2949	utr3	rna-XM_027450756.1	579	939	917	387	497	385	1227	1415	1325	743	521	707
FAM228B	NC_040048.1	110868083	110868144	peak_15824	62	+	-0.0231744228972	1.0	60.6109510086	NA|peak_5279	utr3	rna-XM_013093393.3	12	30	4	10	23	13	16	12	30	1	16	22
MTDH	NC_040047.1	133566814	133567025	peak_9459	212	+	-0.0230962259249	1.0	60.6109510086	peak_3405|peak_3544	utr3	rna-XM_027452501.1	164	265	241	173	157	147	291	322	277	249	118	198
HOMER3	NC_040065.1	3980818	3980939	peak_4471	122	-	-0.0230167670511	1.0	60.6109510086	NA|peak_15694	utr3	rna-XM_027472421.1	100	267	207	119	214	118	319	417	388	270	277	274
CIDEA	NC_040047.1	108177284	108177405	peak_9153	122	+	0.146854378424	1.0	60.6109510086	peak_3239|NA	utr3	rna-XM_013093534.3	2	11	5	0	15	6	3	8	4	3	15	2
DNAJC8	NC_040069.1	6092818	6104082	peak_4173	11265	-	-0.0230962259249	1.0	60.6109510086	peak_16397|peak_17148	cds	rna-XM_027443735.1	6666	12623	11135	4545	6443	4149	11706	15720	13496	8878	6602	7062
TSHZ1	NC_040047.1	95871541	95871752	peak_9013	212	-	-1.02309622592	0.622022411019	249.822057759	peak_4004|peak_4183	cds	rna-XM_021277655.2	71	126	84	47	68	49	140	120	146	89	42	71
SLC29A3	NC_040051.1	32682153	32682332	peak_3428	180	+	-1.02309622592	0.622022411019	249.822057759	peak_8415|peak_8808	utr3	rna-XM_027460551.1	39	84	63	44	35	48	47	80	101	38	42	34
MAML2	NC_040046.1	10985389	10985870	peak_10212	482	-	-0.0230180247139	1.0	60.6109510086	peak_1321|peak_1405	utr3	rna-XM_027467739.1	70	234	213	82	104	48	234	337	236	129	134	120
CNKSR3	NC_040048.1	52812828	52812949	peak_15185	122	-	-0.0230949640235	1.0	60.6109510086	NA|peak_5779	utr3	rna-XM_027454385.1	106	162	169	141	130	101	209	312	248	170	199	195
AASDH	NC_040049.1	47835650	47835861	peak_20123	212	+	-0.0230974879642	1.0	60.6109510086	peak_6211|peak_6469	cds	rna-XM_027457060.1	29	100	52	12	38	14	68	84	58	32	22	27
COL4A5	NC_040055.1	6158840	6161113	peak_16524	2274	-	0.0231744228972	1.0	60.6109510086	peak_10824|NA	cds	rna-XM_027465431.1	1852	2504	2563	1874	2283	1551	924	1254	938	828	629	724
IMMT	NC_040049.1	70398913	70402545	peak_20462	3633	-	-0.0230167670511	1.0	60.6109510086	peak_6865|peak_7145	cds	rna-XM_027455739.1	1015	1730	1419	1110	1002	849	1654	2023	1932	1322	1219	1544
KANK1	NC_040075.1	26218300	26241050	peak_17731	22751	+	0.976903774075	1.0	60.6109510086	peak_17653|peak_18449	cds	rna-XM_027446703.1	109	204	160	70	108	63	587	570	456	391	275	269
TTN	NC_040052.1	20162630	20162691	peak_5395	62	+	-1.0231744229	0.622012413086	551.406443858	NA|peak_9311	cds	rna-XM_027461598.1	101	172	141	145	125	89	45	54	33	19	21	19
AP1S2	NC_040046.1	77482515	77483230	peak_10945	716	-	-0.0230180247139	1.0	60.6109510086	peak_1687|peak_1794	cds	rna-XM_027447956.1	365	803	539	257	334	208	609	589	521	379	253	308
PHF20L1	NC_040047.1	148084756	148097659	peak_9603	12904	+	-0.0230962259249	1.0	60.6109510086	peak_3448|peak_3600	cds	rna-XM_027452729.1	910	1569	1424	669	866	531	1332	1582	1300	1025	665	583
CUX1	NC_040065.1	12350544	12351054	peak_4961	511	-	-1.02309622592	0.622022411019	249.822057759	peak_15257|peak_15936	cds	rna-XM_027472599.1	490	749	734	329	400	409	1061	1385	1100	668	569	644
L3MBTL3	NC_040048.1	61086808	61101721	peak_15308	14914	-	0.0230962259249	1.0	60.6109510086	peak_5570|NA	cds	rna-XM_027454542.1	230	415	328	187	310	177	232	279	199	161	196	115
NDC80	NC_040047.1	104144111	104144885	peak_9090	775	+	-0.0230962259249	1.0	60.6109510086	NA|peak_3343	cds	rna-XM_005009384.3	218	396	354	250	280	194	554	659	559	456	386	423
LAMP2	NC_040055.1	3476703	3476824	peak_16430	122	+	0.976903774075	1.0	60.6109510086	peak_10594|peak_11069	utr3	rna-XM_027464977.1	73	98	117	42	65	55	107	166	145	83	77	97
SFRP1	NC_040068.1	2102068	2102637	peak_1064	570	-	-0.0230962259249	1.0	60.6109510086	NA|peak_16874	utr3	rna-XM_027443614.1	111	204	133	110	121	79	1207	1432	1178	798	739	764
NRARP	NC_040063.1	559591	559890	peak_18586	300	-	-0.0230180247139	1.0	60.6109510086	peak_14055|peak_14696	utr3	rna-XM_013094986.2	102	221	135	76	64	59	217	264	256	135	96	106
2058d621-ab91-45be-b7be-de67b56ec3f8	NC_040054.1	17445338	17445848	peak_14094	511	-	-0.0230962259249	1.0	60.6109510086	peak_10522,peak_10523,peak_10520|peak_10984,peak_10982,peak_10985	NP_exon	2058d621-ab91-45be-b7be-de67b56ec3f8.trans	535	942	752	536	732	378	642	996	742	557	554	532
AHCYL2	NC_040046.1	201972258	201972469	peak_12940	212	-	-0.0230962259249	1.0	60.6109510086	peak_2597|peak_2736	utr3	rna-XM_027461819.1	143	388	367	152	121	316	469	556	383	424	283	234
GLI2	NC_040052.1	30082411	30086178	peak_5637	3768	-	-1.02309622592	0.622022411019	249.822057759	NA|peak_9745	utr5	rna-XM_027461189.1	6	22	18	5	5	19	33	28	30	19	16	13
ITGB1BP2	NC_040055.1	11544799	11545154	peak_16689	356	-	-0.0230962259249	1.0	60.6109510086	peak_10905|peak_11384	utr3	rna-XM_005016612.4	2574	3258	2994	2082	1756	1495	876	933	937	564	451	669
MOK	NC_040050.1	15452960	15455284	peak_6684	2325	+	-0.0230962259249	1.0	60.6109510086	peak_7084|peak_7399	utr5	rna-XM_013100680.3	83	210	144	44	126	91	221	166	209	116	117	145
BRF2	NC_040068.1	1608599	1609259	peak_1027	661	-	-0.608059988685	0.685029977553	239.444841452	peak_16146|peak_16854	utr3	rna-XM_027443575.1	406	659	582	216	238	184	780	1295	975	307	396	353
PDXDC1	NC_040060.1	9964492	9965366	peak_13416	875	+	-0.0230962259249	1.0	60.6109510086	peak_13012|peak_13596	cds	rna-XM_027469009.1	400	736	614	345	503	318	869	837	666	612	402	453
CKAP2	NC_040046.1	26536278	26538663	peak_10431	2386	+	-0.0230180247139	1.0	60.6109510086	peak_195|peak_209	cds	rna-XM_005014853.3	4351	9383	6572	2535	3892	2180	9830	13114	9870	5873	4643	4380
LOC101797220	NC_040075.1	28033987	28034198	peak_17764	212	+	-0.0230974879642	1.0	60.6109510086	peak_17683|peak_18476	utr3	rna-XM_027446566.1	43	76	36	13	29	14	78	54	52	30	14	20
ELMSAN1	NC_040050.1	39088849	39089180	peak_7308	332	+	-0.0230974879642	1.0	60.6109510086	peak_7378|peak_7716	cds	rna-XM_027457771.1	615	1501	912	409	553	329	653	1046	731	347	379	335
UBE3A	NC_040046.1	66730316	66730377	peak_10825	62	-	-1.02309622592	0.622022411019	249.822057759	NA|peak_1732	cds	rna-XM_013104460.3	52	94	66	52	81	39	75	91	77	47	53	40
MPRIP	NC_040060.1	3295201	3299544	peak_13199	4344	-	0.976981975286	1.0	60.6109510086	peak_13174|peak_13782	cds	rna-XM_027468941.1	5742	7562	8879	2992	2658	4538	6267	9419	7724	4315	5579	4848
WNT3	NC_040073.1	1776316	1776526	peak_3550	211	+	-1.94080711056	9.52347169661e-05	0.892664077852	NA|peak_17798	cds	rna-XM_005027845.4	2	0	2	1	0	4	15	19	19	9	7	2
DTYMK	NC_040054.1	14842626	14842747	peak_13962	122	-	-0.0230962259249	1.0	60.6109510086	NA|peak_10913	cds	rna-XM_027464853.1	1341	2618	1624	1480	1034	1091	3034	3932	3787	2662	2066	2905
LOC101802220	NC_040049.1	6156761	6159514	peak_19469	2754	+	-0.0230962259249	1.0	60.6109510086	peak_5911|peak_6168	cds	rna-XM_027456636.1	372	1037	743	315	533	258	1041	1497	1139	854	579	551
MYH9	NC_040046.1	148592431	148608064	peak_12097	15634	-	-0.0230962259249	1.0	60.6109510086	peak_2247|peak_2369	utr5	rna-XM_027450079.1	1544	2953	2665	1455	1828	1473	2057	2628	2092	1846	1505	1399
BDP1	NC_040075.1	62976546	62976846	peak_18124	301	+	-0.0230962259249	1.0	60.6109510086	peak_17851|peak_18659	cds	rna-XM_027447084.1	226	494	355	142	239	169	587	620	570	349	235	275
LURAP1L	NC_040075.1	30809633	30809960	peak_17776	328	+	-0.0231769555916	1.0	60.6109510086	peak_17693,peak_17692|peak_18484,peak_18482	utr3	rna-XM_027446757.1	13	26	50	12	9	9	109	106	77	42	32	15
DACT1	NC_040050.1	9452243	9454658	peak_6538	2416	+	-0.0230962259249	1.0	60.6109510086	peak_6999|peak_7311	cds	rna-XM_027458384.1	909	1982	1449	680	929	912	3115	2911	3340	2065	1777	2355
PALLD	NC_040049.1	26205212	26205273	peak_19787	62	-	-0.0230167670511	1.0	60.6109510086	NA|peak_6810	utr3	rna-XM_027456430.1	201	456	359	234	307	234	372	462	426	350	325	268
KCNH6	NC_040073.1	2469618	2470692	peak_3570	1075	+	-0.0230962259249	1.0	60.6109510086	peak_17069,peak_17070|peak_17814	utr3	rna-XM_027445701.1	1671	3674	2132	1374	1961	950	1855	2449	1780	1191	1263	1174
MAP3K13	NC_040054.1	16118530	16118800	peak_14023	271	-	-0.0230974879642	1.0	60.6109510086	peak_10490|peak_10947	utr3	rna-XM_027463911.1	45	102	78	23	45	27	104	115	143	44	52	56
LSM14A	NC_040057.1	12567742	12568043	peak_19250	302	-	0.561944476007	1.0	60.6109510086	peak_11920|peak_12462	cds	rna-NM_001310414.2	616	1217	997	380	304	326	1021	1096	1096	578	436	559
CDHR1	NC_040051.1	28163667	28163938	peak_3343	272	+	-0.0230974879642	1.0	60.6109510086	peak_8367|peak_8766	utr3	rna-XM_021276798.2	171	527	401	81	243	180	23	24	15	6	5	15
CDC42BPA	NC_040048.1	20964444	20971426	peak_14668	6983	+	-0.0230962259249	1.0	60.6109510086	peak_4495|peak_4711	cds	rna-XM_027453658.1	1131	2128	1593	797	1262	761	1122	1453	1224	994	566	666
ATG2B	NC_040050.1	18778646	18779401	peak_6741	756	+	-0.0230962259249	1.0	60.6109510086	peak_7098|peak_7421	utr3	rna-XM_013100720.3	255	412	348	217	235	163	339	371	395	279	188	307
LAMC1	NC_040053.1	23721835	23723220	peak_2514	1386	-	-0.0230962259249	1.0	60.6109510086	peak_9940|peak_10371	utr3	rna-XM_027462396.1	9092	16644	13811	7013	9366	6470	9130	11848	9320	6328	5356	6038
PRDM11	NC_040050.1	56917129	56919386	peak_7613	2258	+	-0.0230962259249	1.0	60.6109510086	peak_7521|peak_7856	utr5	rna-XM_005024207.4	291	550	434	267	314	201	568	606	609	378	334	392
RAB27B	NC_040075.1	1104330	1104508	peak_17378	179	-	0.0230962259249	1.0	60.6109510086	peak_17935|NA	utr3	rna-XM_027446978.1	36	60	54	10	69	13	417	232	161	314	89	120
LOC113843992	NC_040051.1	2939621	2939682	peak_2893	62	-	0.0230167670511	1.0	60.6109510086	peak_8427|NA	cds	rna-XM_027460452.1	119	202	170	80	139	114	258	288	231	194	194	200
KIF15	NC_040047.1	45791564	45792686	peak_8550	1123	-	0.0230167670511	1.0	60.6109510086	peak_3798|NA	cds	rna-XM_027451159.1	325	647	476	303	441	244	638	951	655	664	565	491
HTD2	NC_040058.1	9196930	9197192	peak_1348	263	-	-1.02309622592	0.622022411019	249.822057759	peak_12257|peak_12816	utr3	rna-XM_027468051.1	135	341	244	127	216	72	329	531	502	218	208	270
RSRC2	NC_040061.1	12597525	12599167	peak_21030	1643	-	-0.0230962259249	1.0	60.6109510086	peak_13773|peak_14413	utr3	rna-XM_021277947.2	1855	3521	3022	1420	1896	1235	3050	3849	3432	2189	1576	1970
DUSP14	NC_040065.1	6994954	6995341	peak_4661	388	-	-0.0231756891752	1.0	60.6109510086	peak_15103|peak_15780	utr3	rna-XM_021267574.2	400	813	638	374	358	210	1046	1106	1025	495	381	529
F8	NC_040055.1	11426046	11426317	peak_16672	272	-	0.976903774075	1.0	60.6109510086	peak_10890|peak_11368	cds	rna-XM_027465529.1	122	262	215	120	139	72	219	267	570	186	205	310
PTN	NC_040046.1	142511057	142511118	peak_11981	62	-	1.02309622592	0.622022411019	249.822057759	peak_2194|NA	utr3	rna-XM_027445011.1	153	282	235	135	139	113	2556	2076	3094	1772	857	1738
TRERF1	NC_040048.1	40565565	40565854	peak_14994	290	+	-0.0230962259249	1.0	60.6109510086	peak_4649|peak_4868	utr5	rna-XM_027454150.1	117	262	167	115	146	88	260	287	339	262	156	158
SLC12A4	NC_040057.1	20591354	20591475	peak_19365	122	-	0.0230167670511	1.0	60.6109510086	peak_11969|NA	cds	rna-XM_027467022.1	402	682	545	388	496	356	772	987	864	723	528	725
TJAP1	NC_040048.1	32050314	32050405	peak_14870	92	+	-0.0230974879642	1.0	60.6109510086	NA|peak_4819	cds	rna-XM_027453955.1	482	696	565	202	225	175	801	1005	1025	314	288	362
CD151	NC_040050.1	50259260	50259771	peak_7513	512	+	-0.0230962259249	1.0	60.6109510086	peak_7474|peak_7813	utr3	rna-XM_027459710.1	1143	2280	2232	1193	1355	1227	906	969	1008	583	522	733
HDHD5	NC_040046.1	138477117	138477178	peak_11884	62	+	0.0230949640235	1.0	60.6109510086	peak_755|NA	utr3	rna-XM_027463083.1	161	227	226	148	189	182	159	235	157	166	168	139
NDC80	NC_040047.1	104152127	104157084	peak_9092	4958	+	-0.0230962259249	1.0	60.6109510086	peak_3203|peak_3345	cds	rna-XM_005009384.3	1256	2340	1977	949	1343	793	2740	3663	2658	2073	1525	1577
COQ8A	NC_040048.1	21046188	21046398	peak_14675	211	-	-1.02309622592	0.622022411019	249.822057759	peak_5332|peak_5579	cds	rna-XM_027453668.1	727	1064	798	667	701	488	404	329	314	208	182	174
CAV3	NC_040058.1	750289	750856	peak_1257	568	-	-0.0230974879642	1.0	60.6109510086	peak_12218|peak_12770	utr3	rna-NM_001310829.1	7183	10304	8908	4389	4100	3496	1678	2712	1702	878	1030	747
WASF3	NC_040046.1	20175621	20176033	peak_10327	413	+	-0.0230962259249	1.0	60.6109510086	NA|peak_169	utr5	rna-XM_027469503.1	37	115	103	47	43	31	157	148	123	69	64	65
PHTF2	NC_040046.1	190585122	190585213	peak_12806	92	+	-0.0230962259249	1.0	60.6109510086	NA|peak_1233	utr3	rna-XM_021268263.2	32	53	47	27	24	22	16	34	24	5	11	20
KDM5A	NC_040046.1	139907438	139912574	peak_11931	5137	+	-0.0230974879642	1.0	60.6109510086	peak_762|peak_833	cds	rna-XM_027467342.1	3111	6244	5535	2026	2605	1793	5930	7981	7227	3442	2594	3021
SMN1	NC_040075.1	62939235	62940113	peak_18118	879	-	-0.0230962259249	1.0	60.6109510086	peak_18295,peak_18294|peak_19119,peak_19120	cds	rna-XM_027446135.1	2712	5459	4345	2181	2745	1979	6130	7957	7183	3956	3806	3887
LOC101797327	NC_040055.1	4117544	4117815	peak_16458	272	+	-0.0230962259249	1.0	60.6109510086	peak_10616|peak_11090	utr3	rna-XM_027465514.1	797	1540	1203	715	680	486	573	713	736	405	308	386
TMEM177	NC_040052.1	30610484	30610575	peak_5645	92	-	-0.0230962259249	1.0	60.6109510086	NA|peak_9752	cds	rna-XM_027462179.1	77	97	76	45	64	50	105	145	106	86	85	66
MORC4	NC_040055.1	11116816	11116877	peak_16651	62	-	-1.60821638687	0.371025736657	644.376431641	NA|peak_11356	cds	rna-XM_013097626.3	19	69	51	28	38	56	107	79	84	38	13	52
dd217bbe-bb44-433d-8347-241632567dba	NC_040071.1	455627	456228	peak_863	602	-	-1.02309622592	0.622022411019	249.822057759	peak_16713,peak_16710|peak_17466,peak_17463	NP_exon	dd217bbe-bb44-433d-8347-241632567dba.trans	901	1564	1186	696	764	629	1467	1918	1462	862	819	735
ZDHHC3	NC_040047.1	45747435	45747556	peak_8545	122	+	-0.0230962259249	1.0	60.6109510086	NA|peak_3095	utr3	rna-XM_005017333.4	176	296	219	109	244	161	405	583	392	419	283	228
ATP8B2	NC_040073.1	7186642	7186942	peak_3905	301	+	-0.0230962259249	1.0	60.6109510086	peak_17236|peak_17996	utr3	rna-XM_027445860.1	622	1214	927	533	827	599	1622	2089	1585	1064	1321	1052
ZNF469	NC_040056.1	20133836	20134017	peak_707	182	+	-0.0230962259249	1.0	60.6109510086	peak_11276|peak_11777	utr3	rna-XM_027465782.1	105	196	138	109	131	74	168	191	193	138	77	121
RRM2	NC_040048.1	102618181	102618419	peak_15751	239	+	-1.02309622592	0.622022411019	249.822057759	peak_5010|peak_5248	utr3	rna-XM_027455224.1	403	861	520	320	443	287	1523	1781	1507	1014	744	902
SYNE1	NC_040048.1	51724532	51725582	peak_15166	1051	-	-0.0230962259249	1.0	60.6109510086	peak_5527|peak_5766	cds	rna-XM_027453316.1	1274	1279	1466	998	1180	842	676	1019	548	557	508	458
ALMS1	NC_040049.1	74577775	74587424	peak_20521	9650	-	0.976981975286	1.0	60.6109510086	peak_6893|peak_7186	NP_exon	rna-XR_003496752.1	173	308	245	108	92	84	236	291	263	199	136	138
PIGU	NC_040066.1	6892030	6892508	peak_5981	479	-	-1.02309622592	0.622022411019	249.822057759	peak_15589|peak_16279	utr3	rna-XM_027472895.1	105	170	179	80	112	67	235	312	258	143	130	157
FGF13	NC_040055.1	14568577	14568638	peak_16755	62	-	-1.02309622592	0.622022411019	249.822057759	NA|peak_11417	cds	rna-XM_027465297.1	609	864	559	446	670	390	118	263	197	73	143	114
UBR4	NC_040067.1	1509884	1510662	peak_16079	779	-	-0.0230167670511	1.0	60.6109510086	peak_15917|peak_16616	cds	rna-XM_013095298.3	665	1352	1108	757	912	631	1116	1441	1215	1042	998	971
GNAI2	NC_040058.1	18499713	18499833	peak_1553	121	+	-0.0230962259249	1.0	60.6109510086	NA|peak_12685	utr3	rna-XM_027467509.1	1476	1949	2951	1440	1245	1917	2936	3777	2177	2264	1864	1537
LOC101793646	NC_040047.1	76713125	76713635	peak_8828	511	+	-0.608217657524	0.685013455167	258.582847066	NA|peak_3233	utr3	rna-XM_027451656.1	14	35	34	16	22	8	85	100	120	37	17	36
FUBP3	NC_040063.1	7538690	7541129	peak_18843	2440	-	-0.0230167670511	1.0	60.6109510086	peak_14164|peak_14813	cds	rna-XM_027470784.1	934	1468	1254	884	1093	782	1438	2022	1729	1210	1215	1362
FBXW11	NC_040059.1	14989817	14989997	peak_17299	181	+	-0.0230962259249	1.0	60.6109510086	peak_12645|peak_13216	utr3	rna-XM_027468126.1	67	96	71	50	45	34	86	118	90	47	48	57
RIBC2	NC_040046.1	131642741	131643009	peak_11807	269	+	-0.562022681457	1.0	60.6109510086	NA|peak_793	utr3	rna-XM_005010061.4	0	7	11	2	0	4	66	87	79	49	22	38
CDC42BPA	NC_040048.1	20952333	20964355	peak_14667	12023	+	-0.0230962259249	1.0	60.6109510086	peak_4494|peak_4709,peak_4710	cds	rna-XM_027453658.1	2257	4478	3613	1846	2733	1715	2643	3080	2758	2073	1322	1636
LOC106019153	NC_040046.1	140214654	140214715	peak_11948	62	+	0.608059988685	0.685029977553	239.444841452	peak_766|NA	utr3	rna-XM_013105654.3	23	33	38	14	17	13	34	55	45	23	24	4
ERI2	NC_040060.1	8287710	8287893	peak_13362	184	+	-0.976903774075	1.0	60.6109510086	NA|peak_13566	cds	rna-XM_027469446.1	181	485	348	210	157	186	498	457	409	351	219	258
RIPK1	NC_040047.1	79464967	79465295	peak_8869	329	+	0.976983232949	1.0	60.6109510086	peak_3122|peak_3255	cds	rna-XM_027451700.1	117	218	178	86	117	70	197	256	191	220	160	161
LOC101801232	NC_040048.1	113169701	113170210	peak_15871	510	-	-0.0230962259249	1.0	60.6109510086	peak_5835|peak_6074	cds	rna-XM_027455354.1	1080	2182	1479	709	948	651	2406	2819	2573	1252	1158	1253
TACC2	NC_040051.1	4845006	4845606	peak_2923	601	-	-1.02309622592	0.622022411019	249.822057759	peak_8438|peak_8837	cds	rna-XM_027460823.1	1303	2699	1888	1027	1559	982	1379	1538	1314	844	850	734
JMJD6	NC_040064.1	3038734	3038943	peak_1835	210	+	-0.0231744228972	1.0	60.6109510086	peak_14295|peak_14956	utr3	rna-XM_005014251.4	71	127	119	50	98	124	193	180	224	114	114	126
BTBD9	NC_040048.1	33424040	33424430	peak_14906	391	-	0.976903774075	1.0	60.6109510086	peak_5415|peak_5649	utr3	rna-XM_027454019.1	243	614	385	204	304	187	443	493	388	339	206	246
MNX1	NC_040047.1	8835203	8835384	peak_8013	182	-	0.562022681457	1.0	60.6109510086	peak_3558|peak_3715	cds	rna-XM_027450186.1	75	101	67	30	27	18	368	282	311	180	91	167
REXO4	NC_040063.1	6428669	6429574	peak_18771	906	+	-0.0230949640235	1.0	60.6109510086	peak_13917|peak_14555	utr3	rna-XM_027470730.1	183	392	289	215	320	203	365	502	429	298	330	396
TMCO4	NC_040067.1	2077154	2085694	peak_16095	8541	-	-0.0230974879642	1.0	60.6109510086	peak_15930|peak_16627	utr3	rna-XM_027443014.1	352	604	338	182	254	131	331	795	403	142	282	213
PTPN13	NC_040049.1	45148854	45149034	peak_20050	181	+	-0.0230962259249	1.0	60.6109510086	NA|peak_6439	cds	rna-XM_027456957.1	86	123	85	75	80	52	258	252	199	157	159	120
TSPAN32	NC_040050.1	32653769	32653889	peak_7010	121	+	-1.02325388615	0.622002253928	736.904754352	NA|peak_7553	utr3	rna-XM_013099789.1	4	30	5	23	8	6	20	32	8	2	19	3
0ab0c2a3-ab76-4a0a-a608-dcc942ba0176	NC_040046.1	81350613	81351651	peak_11037	1039	+	-1.02309622592	0.622022411019	249.822057759	peak_443,peak_444|peak_467,peak_468	NP_exon	0ab0c2a3-ab76-4a0a-a608-dcc942ba0176.trans	1732	2853	2836	1630	1876	1588	2095	2715	2130	332	1738	1497
LOC113839763	NC_040068.1	388813	388992	peak_994	180	+	-1.60821765752	0.371025522161	677.61035443	peak_16068|peak_16785	utr3	rna-XM_027443680.1	103	215	101	119	132	29	219	237	220	39	99	69
TTN	NC_040052.1	20201480	20201931	peak_5419	452	+	-1.02309622592	0.622022411019	249.822057759	peak_8941|peak_9328	cds	rna-XM_027461598.1	3201	4740	4488	2392	2812	2086	1027	1513	1230	644	680	746
MAP3K2	NC_040052.1	37455992	37456083	peak_5765	92	+	-0.608138189896	0.685021782428	249.71257932	NA|peak_9506	utr3	rna-XM_027460926.1	32	51	29	29	23	8	52	62	36	17	19	20
EEF1AKNMT	NC_040053.1	26957673	26957822	peak_2651	150	+	-1.02309622592	0.622022411019	249.822057759	peak_9675|peak_10095	cds	rna-XM_027463112.1	150	366	304	160	193	161	287	484	414	173	205	256
SRGAP1	NC_040046.1	167842903	167923352	peak_12555	80450	-	-0.0230962259249	1.0	60.6109510086	peak_2431|peak_2553	cds	rna-XM_027456418.1	2501	4845	4426	2069	2202	2010	5806	8340	5862	4723	3511	3096
VCAN	NC_040075.1	71856398	71856609	peak_18224	212	+	-0.0230962259249	1.0	60.6109510086	NA|peak_18710	cds	rna-XM_027446166.1	416	1250	795	362	790	312	1974	3100	2779	1715	1441	1758
LPIN1	NC_040048.1	103586027	103589703	peak_15770	3677	+	-0.0230962259249	1.0	60.6109510086	peak_5017|peak_5257	cds	rna-XM_013106887.3	71	109	96	53	72	33	119	173	206	96	88	151
LOC101803508	NC_040050.1	52566752	52566963	peak_7554	212	-	0.0230962259249	1.0	60.6109510086	peak_8090|NA	cds	rna-XM_027458895.1	125	234	201	110	164	86	174	110	160	109	72	102
SMIM5	NC_040064.1	3654622	3654713	peak_1888	92	-	-1.02317568918	0.622012251195	633.83074332	NA|peak_15155	utr3	rna-XM_027471258.1	112	410	204	72	276	74	70	124	98	44	25	59
DMAP1	NC_040053.1	15013942	15016940	peak_2367	2999	-	-0.0230180247139	1.0	60.6109510086	peak_9871|peak_10302	cds	rna-XM_027462999.1	486	932	784	265	331	306	1067	1319	1258	613	490	555
KIF3B	NC_040066.1	15047908	15048089	peak_6233	182	+	-1.02309622592	0.622022411019	249.822057759	peak_15458|peak_16140	utr3	rna-XM_027472748.1	78	215	179	77	108	116	179	209	223	92	102	153
EIF4G1	NC_040054.1	9178992	9180305	peak_13786	1314	-	-0.0230962259249	1.0	60.6109510086	peak_10370|peak_10833	cds	rna-XM_027464231.1	4774	8994	8272	4839	5814	4788	9216	11018	10307	7497	6747	7497
DNAJB4	NC_040053.1	16703807	16706296	peak_2412	2490	+	-0.0230180247139	1.0	60.6109510086	peak_9559|peak_9963	utr3	rna-XM_005010296.4	742	1431	996	464	618	397	870	945	885	529	359	533
STARD13	NC_040046.1	22592736	22593475	peak_10377	740	-	-0.0230962259249	1.0	60.6109510086	peak_1408,peak_1406|peak_1501,peak_1499	cds	rna-XM_027470162.1	927	1750	1310	647	855	595	1156	1846	1098	611	791	615
ATXN7L2	NC_040068.1	47541	50372	peak_971	2832	+	-0.0230962259249	1.0	60.6109510086	peak_16059|peak_16774	cds	rna-XM_027443611.1	789	1086	1017	697	529	370	622	609	678	380	287	274
C15H16orf71	NC_040060.1	12021598	12021869	peak_13494	272	+	-0.0231756891752	1.0	60.6109510086	peak_13037|peak_13622	cds	rna-XM_027469354.1	23	86	51	24	46	14	73	134	104	48	44	42
SMARCC1	NC_040047.1	724972	725062	peak_7832	91	+	-0.0230167670511	1.0	60.6109510086	NA|peak_2784	utr3	rna-XM_027452915.1	737	1807	1404	817	1043	883	1911	2800	2060	1672	1710	1547
NOVA1	NC_040050.1	46420377	46420438	peak_7458	62	-	-0.0230949640235	1.0	60.6109510086	NA|peak_8434	cds	rna-XM_027458959.1	133	210	185	137	164	143	164	182	170	118	116	140
TCERG1	NC_040059.1	2291688	2293488	peak_16856	1801	-	-0.0230962259249	1.0	60.6109510086	peak_12668|peak_13237	cds	rna-XM_027468719.1	1083	1909	1708	960	1206	854	2125	2580	2251	1685	1498	1393
IGSF9	NW_020865936.1	12400	12582	peak_4234	183	+	-0.0230962259249	1.0	60.6109510086	peak_18454|peak_19273	cds	rna-XM_027448094.1	410	776	700	353	472	396	685	1079	720	499	563	567
UBXN2A	NC_040048.1	110689702	110690003	peak_15821	302	+	-0.0231756891752	1.0	60.6109510086	peak_5036|peak_5277	utr3	rna-XM_027455309.1	461	717	628	361	369	218	377	378	406	153	154	191
MPRIP	NC_040060.1	3277442	3277563	peak_13190	122	-	-0.0230167670511	1.0	60.6109510086	NA|peak_13773	utr3	rna-XM_027468941.1	473	1102	457	436	660	274	459	700	597	436	495	353
CASC1	NC_040046.1	128054817	128058470	peak_11753	3654	-	-0.0230962259249	1.0	60.6109510086	peak_2073|peak_2187,peak_2188	cds	rna-XM_027450000.1	60	116	108	45	53	55	126	227	225	117	91	109
BMPR2	NC_040052.1	16539208	16539448	peak_5276	241	+	0.976903774075	1.0	60.6109510086	peak_8843|peak_9243	utr3	rna-XM_005016861.3	150	253	231	119	123	93	194	212	205	148	158	105
TMEM204	NC_040060.1	13503721	13503900	peak_13569	180	+	-0.0230962259249	1.0	60.6109510086	peak_13079|peak_13672	utr3	rna-XM_027469574.1	99	177	122	63	157	57	236	260	248	133	162	181
ITPRID2	NC_040052.1	18904558	18910934	peak_5350	6377	-	-0.0230167670511	1.0	60.6109510086	peak_9267|peak_9661	cds	rna-XM_027461105.1	175	342	329	174	200	163	320	309	271	229	196	229
EFCAB3	NC_040073.1	1981137	1981402	peak_3556	266	+	-1.60837660591	0.176242169999	444.887419282	NA|peak_17802	cds	rna-XM_027445790.1	13	15	7	15	1	1	8	10	14	6	0	0
ZNF804A	NC_040052.1	10191901	10192051	peak_5148	151	-	2.29914469924	0.218801677097	479.246923096	peak_9187|NA	cds	rna-XM_021276561.2	6	19	15	0	6	2	14	9	13	8	12	3
PCYT1B	NC_040046.1	88624362	88624663	peak_11100	302	+	-0.0230974879642	1.0	60.6109510086	peak_473|peak_498	utr3	rna-XM_027449043.1	109	245	201	62	81	69	174	347	171	121	94	91
SCN4A	NC_040073.1	900769	900890	peak_3509	122	+	1.02325388615	0.622002253928	736.904754352	peak_17032|NA	cds	rna-XM_027445679.1	55	19	33	65	10	35	31	84	83	26	14	47
SLC25A1	NC_040061.1	5734783	5739703	peak_20695	4921	+	-0.0230962259249	1.0	60.6109510086	NA|peak_14057	utr5	rna-XM_027469930.1	184	258	219	188	153	119	615	480	533	419	331	369
LOC101795245	NC_040055.1	4344096	4344545	peak_16467	450	-	-0.0230962259249	1.0	60.6109510086	peak_10795|peak_11271	utr3	rna-XM_027465520.1	1220	1930	1198	862	999	536	1029	1377	1000	680	639	554
FBXL22	NC_040056.1	14374047	14374376	peak_467	330	-	-0.0230962259249	1.0	60.6109510086	peak_11555|peak_12072	cds	rna-XM_021277799.2	350	728	584	315	482	351	210	232	195	181	143	93
CCDC92	NC_040061.1	11439285	11441475	peak_20942	2191	+	-0.0230962259249	1.0	60.6109510086	peak_13521|peak_14159	cds	rna-XM_013096463.3	166	368	269	128	173	94	384	577	460	299	233	256
SMS	NC_040046.1	89601872	89601962	peak_11117	91	-	-0.0230962259249	1.0	60.6109510086	peak_1757|peak_1869	cds	rna-XM_021279001.2	325	503	375	225	380	199	521	509	473	417	310	284
DSP	NC_040047.1	67954655	67955316	peak_8791	662	-	-0.0230180247139	1.0	60.6109510086	peak_3895|peak_4070	cds	rna-XM_005010729.4	72	141	176	17	75	66	2877	3339	2254	1946	1227	1169
PSMD12	NC_040064.1	9245422	9247717	peak_2050	2296	+	-0.0230962259249	1.0	60.6109510086	peak_14406|peak_15066	cds	rna-XM_027471670.1	627	1467	1287	647	773	606	1359	1641	1677	1135	849	896
PLEKHF1	NC_040057.1	15287274	15287454	peak_19292	181	-	-1.02309622592	0.622022411019	249.822057759	peak_11939|peak_12486	utr3	rna-XM_021272923.2	124	212	204	80	133	116	138	182	143	79	79	110
BEND5	NC_040053.1	12453430	12453491	peak_2292	62	+	1.29914469924	0.453184573773	604.294855975	peak_9502|NA	cds	rna-XM_027463543.1	16	13	6	2	5	0	71	69	250	55	36	91
POU6F1	NC_040073.1	5684727	5684787	peak_3795	61	+	-0.976984113231	0.151890257955	399.226951486	NA|peak_17932	cds	rna-XM_027445457.1	13	114	97	58	32	61	110	116	85	171	121	139
SPRED2	NC_040048.1	14209706	14209767	peak_14485	62	+	-1.02309622592	0.622022411019	249.822057759	NA|peak_4635	utr3	rna-XM_005018148.4	44	105	81	55	74	46	120	133	116	58	85	62
CCDC148	NC_040050.1	3970699	3998928	peak_6396	28230	-	-0.0230962259249	1.0	60.6109510086	peak_7632|peak_7978	cds	rna-XM_027458221.1	432	511	545	396	321	262	855	912	673	598	400	422
KCNH1	NC_040048.1	775777	775958	peak_14222	182	-	-0.561865012757	1.0	60.6109510086	NA|peak_5356	cds	rna-XM_027453007.1	3	11	12	4	3	2	36	66	70	16	23	34
FCHSD2	NC_040046.1	1647137	1650781	peak_10091	3645	+	-0.0230949640235	1.0	60.6109510086	peak_73|peak_72	cds	rna-XM_027462102.1	66	93	123	96	110	95	166	200	221	197	146	157
RRAD	NC_040057.1	12238960	12239290	peak_19236	331	-	-1.02317568918	0.622012251195	633.83074332	peak_11917|peak_12459	utr3	rna-XM_027466956.1	108	133	134	101	89	59	55	59	49	48	11	13
AGBL3	NC_040046.1	158995103	158995223	peak_12364	121	-	1.34534220008	0.285164516773	593.9853507	peak_2350|NA	cds	rna-XM_021275699.2	14	12	33	13	16	1	27	36	18	5	9	2
ARHGEF10L	NC_040067.1	1141047	1141228	peak_16071	182	+	0.976983232949	1.0	60.6109510086	peak_15774,peak_15776|peak_16486,peak_16488	utr3	rna-XM_027443076.1	217	350	268	132	196	146	127	210	183	128	115	155
SPOCK3	NC_040049.1	26764972	26765357	peak_19793	386	+	-1.02309622592	0.622022411019	249.822057759	peak_6075|peak_6331	cds	rna-XM_027456451.1	39	75	80	32	36	53	180	149	179	97	80	111
NAV2	NC_040050.1	58162806	58162987	peak_7680	182	+	-0.0231756891752	1.0	60.6109510086	NA|peak_7883	utr5	rna-XM_027458941.1	26	68	61	26	31	28	77	86	72	35	25	31
ZBTB20	NC_040046.1	117136811	117136962	peak_11456	152	-	0.0230962259249	1.0	60.6109510086	peak_1929|NA	utr5	rna-XM_027462841.1	37	60	41	31	18	21	19	22	25	9	9	15
LOC101803508	NC_040050.1	52559503	52559803	peak_7547	301	-	-1.02309622592	0.622022411019	249.822057759	peak_8084|peak_8466	cds	rna-XM_027458895.1	117	274	225	134	177	85	222	207	212	128	109	123
PEX6	NC_040048.1	16509847	16510235	peak_14587	389	+	-0.0230974879642	1.0	60.6109510086	peak_4464|peak_4679	cds	rna-XM_027453541.1	477	389	416	273	83	140	393	525	426	205	158	173
JMJD7	NC_040050.1	37994391	37994629	peak_7254	239	+	0.561944476007	1.0	60.6109510086	peak_7359|NA	utr3	rna-XM_027459112.1	35	49	46	12	24	8	36	85	63	16	40	41
RPAP2	NC_040053.1	35841475	35842731	peak_2848	1257	-	-0.0230962259249	1.0	60.6109510086	NA|peak_10513	cds	rna-XM_027462912.1	194	333	226	178	206	135	354	360	381	260	222	249
TJP1	NC_040056.1	16586041	16587201	peak_508	1161	-	-0.0230962259249	1.0	60.6109510086	peak_11571|peak_12090	cds	rna-XM_027465587.1	638	1189	967	597	840	516	783	902	718	542	540	492
PRDM15	NC_040046.1	79660398	79662322	peak_10996	1925	-	-0.0230962259249	1.0	60.6109510086	NA|peak_1815	cds	rna-XM_021276632.2	129	129	199	136	108	104	179	256	156	151	114	112
PACSIN2	NC_040046.1	129437333	129439124	peak_11788	1792	-	-0.0230962259249	1.0	60.6109510086	peak_2086|peak_2204	cds	rna-XM_021279527.2	897	1459	1386	734	890	597	1334	1445	1145	1283	735	646
ZNF280D	NC_040057.1	1503910	1509962	peak_19088	6053	+	-0.0230962259249	1.0	60.6109510086	peak_11714|peak_12235	cds	rna-XM_027466738.1	617	1031	731	500	747	394	842	1210	991	683	653	831
TMEM108	NC_040047.1	44995435	44997284	peak_8513	1850	+	-1.0231744229	0.622012413086	551.406443858	NA|peak_3079	utr5	rna-XM_027450154.1	37	32	34	21	49	30	122	82	103	66	46	58
SWAP70	NC_040052.1	2622578	2622937	peak_5010	360	+	-1.02309622592	0.622022411019	249.822057759	peak_8707|peak_9106	utr5	rna-XM_021269088.2	281	1074	1017	565	639	506	869	819	209	523	65	506
PHF13	NC_040067.1	6375026	6375235	peak_16283	210	-	0.976903774075	1.0	60.6109510086	peak_16031|peak_16735	utr3	rna-XM_027443412.1	161	217	149	102	83	104	209	175	157	121	85	133
LOC101804924	NC_040046.1	201458454	201458869	peak_12906	416	-	0.976903774075	1.0	60.6109510086	peak_2585|peak_2728	utr3	rna-XM_005014552.4	36960	73172	60432	30734	26176	28060	44404	52671	45878	34242	24286	31052
C14H5orf15	NC_040059.1	4485023	4485441	peak_16927	419	-	-0.0230962259249	1.0	60.6109510086	peak_12686|peak_13262	cds	rna-XM_027468458.1	877	1817	1472	775	1019	819	2117	2439	2141	1501	1273	1356
LOC101800696	NC_040075.1	9526206	9526267	peak_17475	62	+	-0.0230962259249	1.0	60.6109510086	NA|peak_18318	utr5	rna-XM_005019423.2	72	208	163	110	91	72	174	144	137	114	80	83
TMEM260	NC_040050.1	8652759	8653089	peak_6518	331	+	-1.02309622592	0.622022411019	249.822057759	peak_6990|peak_7300	utr3	rna-XM_027457913.1	141	285	236	124	167	113	379	567	597	266	247	288
NCKAP5	NC_040052.1	33961066	33961247	peak_5683	182	+	-2.0232551568	0.215045056389	487.780931776	NA|peak_9463	cds	rna-XM_021272932.2	2	13	11	5	2	12	19	22	22	1	9	6
AP3D1	NC_040065.1	671610	671701	peak_4270	92	+	0.023078568402	1.0	60.6109510086	peak_14582|NA	utr3	rna-XM_027471757.1	59	139	76	127	120	96	115	147	124	143	151	180
GATA2	NC_040058.1	19462854	19463749	peak_1606	896	+	-0.0230167670511	1.0	60.6109510086	NA|peak_12719	cds	rna-XM_027467602.1	70	101	114	53	105	51	45	72	64	54	47	57
PSMA7	NC_040066.1	12271887	12272938	peak_6103	1052	-	0.976903774075	1.0	60.6109510086	peak_15636|peak_16339	utr3	rna-XM_027472852.1	1948	4055	3122	1537	2174	1417	4056	5143	4236	2944	2514	2513
ACOT13	NC_040047.1	94740978	94746299	peak_8996	5322	+	-0.0230962259249	1.0	60.6109510086	peak_3995,peak_3173|peak_3307	cds	rna-XM_005023065.2	818	1330	1147	770	746	643	879	1051	1669	680	612	1228
AFAP1L1	NC_040055.1	846236	846505	peak_16387	270	-	0.0230167670511	1.0	60.6109510086	peak_10765|NA	NP_exon	rna-XR_003499407.1	930	1940	1426	959	796	751	560	609	418	527	309	368
DUSP10	NC_040048.1	2582328	2584346	peak_14271	2019	+	-0.0230962259249	1.0	60.6109510086	peak_4336|peak_4548	cds	rna-XM_027453106.1	666	1116	791	468	536	438	623	500	605	287	213	298
KMT2C	NC_040047.1	6672165	6674045	peak_7981	1881	-	-0.0230962259249	1.0	60.6109510086	peak_3542|peak_3698	cds	rna-XM_027450414.1	864	1451	1209	699	909	638	1227	1540	1292	864	777	840
DDX47	NC_040046.1	159299043	159299853	peak_12383	811	+	-0.0230962259249	1.0	60.6109510086	peak_962,peak_963|peak_1040	utr3	rna-XM_027453323.1	971	1845	1759	747	873	692	2217	2476	2395	1404	1008	1352
LOC101789923	NW_020865493.1	98355	98571	peak_3910	217	-	-0.0230167670511	1.0	60.6109510086	peak_18405,peak_18406|peak_19230,peak_19231	utr3	rna-XM_027447719.1	148	296	268	123	184	124	239	257	223	206	159	160
OARD1	NC_040072.1	5635893	5636043	peak_9995	151	-	-0.0230962259249	1.0	60.6109510086	NA|peak_17779	utr3	rna-XM_005026826.4	354	564	562	272	380	322	461	651	470	399	346	320
AXIN2	NC_040064.1	9842526	9842706	peak_2073	181	+	-0.0231744228972	1.0	60.6109510086	NA|peak_15080	cds	rna-XM_027471334.1	90	174	138	92	108	130	747	748	636	582	431	471
LOC113841470	NW_020865992.1	8586	10147	peak_18276	1562	-	-0.0230167670511	1.0	60.6109510086	peak_18464|peak_19282	cds	rna-XM_027448127.1	5203	8365	5978	5323	4844	3919	2486	3101	2596	1975	2324	2172
TCF15	NC_040066.1	14842034	14843946	peak_6211	1913	-	0.561944476007	1.0	60.6109510086	peak_15686|peak_16394	cds	rna-XM_027473326.1	996	1919	1152	577	496	407	567	793	849	380	311	409
SLC41A3	NC_040058.1	20871000	20871464	peak_1637	465	-	-0.0230962259249	1.0	60.6109510086	peak_12371|peak_12940	utr5	rna-XM_021276030.2	958	1876	1702	739	842	746	2370	3294	2836	1406	1281	1436
FUBP1	NC_040053.1	16632059	16657978	peak_2408	25920	-	-0.0230962259249	1.0	60.6109510086	peak_9557,peak_9893|peak_9961,peak_10325	NP_exon	rna-XR_003498961.1	49439	98557	78622	32508	48290	27642	32439	38239	30990	23041	15082	15947
CNKSR3	NC_040048.1	52868672	52869929	peak_15188	1258	-	0.976903774075	1.0	60.6109510086	peak_5543|peak_5782	utr5	rna-XM_027454385.1	227	1149	387	151	586	164	1216	538	1224	773	205	757
HSPE1	NC_040052.1	5777761	5778916	peak_5075	1156	-	-0.0230167670511	1.0	60.6109510086	peak_9161|peak_9550	cds	rna-XM_027461779.1	2271	3655	3346	2155	2332	1906	2843	4139	3665	2580	2700	2606
ARL6IP4	NC_040061.1	11829302	11832984	peak_20962	3683	-	-0.0230180247139	1.0	60.6109510086	peak_13735|peak_14379	NP_exon	rna-XR_003500808.1	5543	10835	9683	3630	4436	3624	11183	13449	10915	5868	5367	5042
UNC45A	NC_040056.1	283610	283759	peak_30	150	+	-0.0230962259249	1.0	60.6109510086	NA|peak_11461	cds	rna-XM_027466657.1	84	156	141	97	64	107	240	196	218	150	93	172
ZBTB21	NC_040046.1	79747226	79747287	peak_11003	62	-	-0.0230962259249	1.0	60.6109510086	NA|peak_1822	cds	rna-XM_027448524.1	122	134	115	109	102	69	142	150	126	113	75	88
USP38	NC_040049.1	35604732	35606508	peak_19903	1777	-	-0.0230962259249	1.0	60.6109510086	peak_6610|peak_6874	cds	rna-XM_021268998.2	516	1041	793	383	482	302	807	1118	874	412	414	445
TTN	NC_040052.1	20076790	20077060	peak_5375	271	+	-0.0230167670511	1.0	60.6109510086	NA|peak_9300	cds	rna-XM_027461598.1	764	988	1153	704	714	578	215	277	254	208	158	180
TOX2	NC_040066.1	2968434	2968704	peak_5868	271	-	-0.0230962259249	1.0	60.6109510086	NA|peak_16232	utr3	rna-XM_027472955.1	151	234	253	133	211	114	365	337	291	213	221	158
LOC101793478	NC_040050.1	32227086	32227326	peak_7002	241	-	0.0230962259249	1.0	60.6109510086	peak_7887|NA	cds	rna-XM_005019742.4	589	943	1360	567	794	419	341	383	549	368	236	301
AFF4	NC_040059.1	3302045	3302255	peak_16892	211	+	-0.0230962259249	1.0	60.6109510086	peak_12442|peak_13009	NP_exon	rna-XR_003500581.1	181	254	196	121	110	110	247	237	271	117	145	165
CTNS	NC_040065.1	9301147	9301207	peak_4753	61	+	3.14745450393	0.0215069777628	91.6937784416	peak_14809|NA	utr3	rna-XM_013102990.2	16	33	12	3	3	1	13	40	28	21	19	10
DTX2	NC_040065.1	12171730	12178818	peak_4949	7089	+	-0.0230962259249	1.0	60.6109510086	peak_14921|peak_15594	cds	rna-XM_027472064.1	600	990	900	686	519	656	861	1165	957	582	708	598
CTNNA3	NC_040053.1	3620959	3653260	peak_2134	32302	-	-1.0231744229	0.622012413086	551.406443858	NA|peak_10214	cds	rna-XM_013092183.3	18	45	33	18	35	29	91	66	72	45	37	40
GTF2E2	NC_040049.1	16262908	16265114	peak_19635	2207	-	-0.0230962259249	1.0	60.6109510086	peak_6479|peak_6747	utr3	rna-XM_021276079.2	376	771	557	346	384	338	722	938	930	601	568	547
UBTD2	NC_040059.1	12355695	12356414	peak_17180	720	-	-0.608059988685	0.685029977553	239.444841452	peak_12791|peak_13370	utr3	rna-XM_027468344.1	627	1315	731	411	373	353	1211	1274	1135	563	407	396
STARD9	NC_040050.1	38798088	38798268	peak_7294	181	-	-0.0230167670511	1.0	60.6109510086	peak_7977,peak_7374|peak_7712,peak_8351	utr3	rna-XM_027458580.1	187	383	321	153	234	239	191	191	171	121	151	135
PTHLH	NC_040046.1	134148403	134148760	peak_11842	358	-	0.562022681457	1.0	60.6109510086	peak_2114|peak_2235	utr5	rna-XM_005010059.4	15	32	30	4	3	16	263	334	248	226	134	100
N4BP2L1	NC_040046.1	22235106	22235585	peak_10369	480	-	-0.0230180247139	1.0	60.6109510086	peak_1401|peak_1493	utr3	rna-XM_005013788.4	303	403	544	201	151	205	673	1008	654	472	434	361
UFL1	NC_040048.1	76867697	76869318	peak_15474	1622	-	-0.0230962259249	1.0	60.6109510086	peak_5634|peak_5890	cds	rna-XM_027454844.1	272	521	375	304	303	256	472	626	570	440	352	381
FSCN1	NC_040060.1	3884295	3884476	peak_13229	182	-	-0.0230962259249	1.0	60.6109510086	NA|peak_13795	cds	rna-XM_027469169.1	1801	4991	3663	1776	2652	2054	6694	9945	8192	5626	5516	5841
MANSC1	NC_040046.1	133093084	133093354	peak_11826	271	-	-0.608138189896	0.685021782428	249.71257932	NA|peak_2227	cds	rna-XM_005010036.4	33	77	53	30	35	22	76	107	116	35	39	40
PIK3AP1	NC_040051.1	20941923	20942224	peak_3242	302	+	-0.0230192825141	1.0	60.6109510086	peak_8319|peak_8719	utr3	rna-XM_027460804.1	43	59	49	21	18	10	26	63	59	16	22	18
ddb5325f-dbcd-4e14-853b-4d16b4b39f0a	NC_040073.1	4481140	4481201	peak_3694	62	-	-0.0230962259249	1.0	60.6109510086	NA|peak_18076,peak_18075	NP_exon	ddb5325f-dbcd-4e14-853b-4d16b4b39f0a.trans	60	103	137	78	71	35	119	143	46	86	20	73
PHF21B	NC_040046.1	131061564	131061744	peak_11800	181	-	-0.0230962259249	1.0	60.6109510086	peak_2095|peak_2214	utr3	rna-XM_027450874.1	35	49	50	20	24	30	78	162	140	50	59	92
LOC101801322	NC_040061.1	3935599	3935810	peak_20623	212	-	0.97706143416	1.0	60.6109510086	peak_13570|NA	utr3	rna-XM_027469873.1	39	94	66	27	47	18	48	132	104	80	102	56
ATXN7	NC_040058.1	7247263	7247822	peak_1334	560	-	-0.0230962259249	1.0	60.6109510086	peak_12247|peak_12805	cds	rna-XM_027467751.1	310	551	455	339	384	279	398	494	514	254	343	346
71dfdb0a-45bb-4178-a0ca-2c5e43f82fc6	NC_040075.1	63779214	63779275	peak_18151	62	+	1.56210214033	0.625027232164	248.678422516	peak_17867|NA	NP_exon	71dfdb0a-45bb-4178-a0ca-2c5e43f82fc6.trans	7	44	28	4	11	8	4	23	10	5	17	9
d07a1874-6dd9-43a7-88b5-131ad5e44ea9	NC_040065.1	5938933	5939114	peak_4606	182	+	0.0230167670511	1.0	60.6109510086	peak_14757,peak_14760|NA	NP_exon	d07a1874-6dd9-43a7-88b5-131ad5e44ea9.trans	80	113	134	75	102	64	49	73	64	52	49	71
STRBP	NC_040063.1	9945632	9958497	peak_19007	12866	-	0.976903774075	1.0	60.6109510086	peak_14228|peak_14888	cds	rna-XM_027470911.1	209	438	444	178	242	199	735	804	636	493	414	485
LOC101795454	NW_020865549.1	87495	88136	peak_7770	642	-	0.0230962259249	1.0	60.6109510086	peak_18415|NA	cds	rna-XM_027447773.1	130	211	188	88	153	87	187	354	244	185	147	153
ANKRD31	NC_040075.1	24471557	24471768	peak_17701	212	+	-0.608217657524	0.685013455167	258.582847066	NA|peak_18436	cds	rna-XM_027446068.1	5	37	20	10	9	14	41	49	42	7	17	15
BCL7B	NC_040074.1	4375204	4375444	peak_1191	241	+	-0.0230962259249	1.0	60.6109510086	peak_17435|peak_18218	utr3	rna-XM_027445917.1	247	461	341	230	254	200	482	575	573	327	330	363
RNF217	NC_040048.1	63429789	63431098	peak_15331	1310	-	0.976903774075	1.0	60.6109510086	peak_5584|NA	utr3	rna-XM_027453577.1	116	155	173	94	87	71	50	85	79	48	61	33
ARID3B	NC_040056.1	12588907	12589148	peak_383	242	-	0.0230167670511	1.0	60.6109510086	peak_11521|NA	utr3	rna-XM_027466632.1	375	729	414	136	681	311	612	897	716	755	173	855
0e02bd0f-cabf-4ac9-a4ee-494247365e7e	NC_040059.1	13819506	13819686	peak_17239	181	+	-0.0230974879642	1.0	60.6109510086	NA|peak_13196,peak_13194	NP_exon	0e02bd0f-cabf-4ac9-a4ee-494247365e7e.trans	586	1022	1659	268	545	731	3102	2983	1814	1578	904	876
MITF	NC_040058.1	5011798	5017457	peak_1297	5660	-	-0.0230962259249	1.0	60.6109510086	peak_12242|peak_12798	cds	rna-XM_027467278.1	165	278	237	128	185	110	259	257	214	194	135	139
LARP1	NC_040059.1	8902903	8903412	peak_17077	510	+	-0.0230962259249	1.0	60.6109510086	peak_12535|peak_13099	cds	rna-XM_027468495.1	2140	4233	3512	1803	1971	1887	6596	6719	6928	4202	3564	4019
SRGAP2	NC_040072.1	622858	623309	peak_9723	452	+	-0.0230962259249	1.0	60.6109510086	peak_16772|peak_17516	utr3	rna-XM_005011745.3	504	973	701	366	418	294	818	985	841	442	450	474
ATF6	NC_040053.1	28044929	28044989	peak_2700	61	-	-0.0230962259249	1.0	60.6109510086	peak_9998|peak_10442	cds	rna-XM_027462432.1	309	607	567	284	382	283	615	788	757	533	415	505
MTG1	NC_040051.1	29454872	29455261	peak_3373	390	-	-0.0230962259249	1.0	60.6109510086	peak_8635|peak_9038	utr3	rna-XM_027460590.1	1386	2002	1963	1257	1270	1045	1920	2218	2026	1600	1230	1384
PRDM11	NC_040050.1	56924289	56924769	peak_7617	481	+	-0.0231756891752	1.0	60.6109510086	peak_7524|peak_7859	cds	rna-XM_027459732.1	365	586	503	227	274	210	576	804	643	281	273	298
NEDD4L	NC_040075.1	345713	346044	peak_17360	332	-	-0.0230962259249	1.0	60.6109510086	peak_17930|peak_18742	cds	rna-XM_005023375.4	709	1413	1052	493	656	433	576	857	544	322	319	265
FOXO1	NC_040046.1	26316189	26317299	peak_10417	1111	-	-0.0230962259249	1.0	60.6109510086	peak_1428|peak_1523	cds	rna-XM_005014856.4	468	899	824	313	420	323	793	994	750	470	401	335
HOXA6	NC_040047.1	35003267	35004961	peak_8352	1695	-	-0.0230167670511	1.0	60.6109510086	peak_3698|peak_3869	cds	rna-XM_005022081.4	1043	1888	1803	1107	1298	1006	1961	2277	1713	1638	1526	1261
GRIK1	NC_040046.1	95462200	95462380	peak_11224	181	+	-1.02309622592	0.622022411019	249.822057759	NA|peak_550	utr3	rna-XM_027449232.1	83	200	112	73	158	77	49	54	49	34	16	24
SAMD11	NC_040067.1	5475199	5475619	peak_16262	421	-	-0.0230974879642	1.0	60.6109510086	peak_16018|peak_16722	cds	rna-XM_027443360.1	993	1584	1746	586	455	553	3435	3397	3084	1404	1163	1108
LOC101800493	NC_040046.1	107768808	107769048	peak_11307	241	-	0.561944476007	1.0	60.6109510086	peak_1844|NA	utr3	rna-XM_027449363.1	76	165	138	37	60	36	20	28	54	16	14	21
MINDY2	NC_040057.1	766630	769947	peak_19073	3318	-	-0.0230962259249	1.0	60.6109510086	peak_11857|peak_12395	cds	rna-XM_027467125.1	1098	1908	1713	733	948	715	2019	2275	2130	1241	922	1004
UTRN	NC_040048.1	48431768	48431828	peak_15098	61	+	-0.0230962259249	1.0	60.6109510086	NA|peak_4922	cds	rna-XM_027454296.1	130	287	263	145	202	162	386	441	435	307	244	279
RPH3AL	NC_040065.1	8839769	8839860	peak_4725	92	-	-1.3451018847	0.0231225439081	95.7010202474	NA|peak_15828	utr3	rna-XM_027472506.1	6	34	24	27	49	9	20	24	37	20	8	17
DTX3L	NC_040052.1	36010128	36010309	peak_5706	182	+	-1.02317568918	0.622012251195	633.83074332	peak_9089|peak_9478	cds	rna-XM_027462226.1	43	81	56	30	56	18	68	70	76	35	25	34
LOC113839633	NC_040058.1	18947011	18947251	peak_1576	241	+	-0.0230962259249	1.0	60.6109510086	peak_12145|peak_12696	utr5	rna-XM_027467377.1	108	227	156	88	150	98	185	270	178	188	99	93
FBXO11	NC_040048.1	19680966	19681297	peak_14640	332	+	-0.0230180247139	1.0	60.6109510086	peak_4484|peak_4699	utr3	rna-XM_005012086.4	595	988	889	335	454	252	890	1037	784	494	374	401
TAL1	NC_040053.1	13329621	13329892	peak_2302	272	+	-1.02309622592	0.622022411019	249.822057759	peak_9511|peak_9912	utr3	rna-XM_027462946.1	61	126	141	79	56	65	128	124	112	67	72	70
LSM14B	NC_040066.1	12261836	12261896	peak_6101	61	+	0.0230167670511	1.0	60.6109510086	peak_15396|NA	cds	rna-XM_027472847.1	264	622	501	290	382	267	479	620	565	432	469	432
PER2	NC_040054.1	18491617	18492068	peak_14109	452	-	-0.0230974879642	1.0	60.6109510086	peak_10529|peak_10992	cds	rna-XM_027463950.1	574	1115	850	373	409	280	1000	1151	879	496	378	419
KAT7	NC_040073.1	4031726	4033109	peak_3657	1384	-	-0.0230962259249	1.0	60.6109510086	peak_17291|peak_18056	cds	rna-XM_027445462.1	1564	2742	2385	1064	1373	932	2702	3627	2815	1688	1370	1411
SUB1	NC_040065.1	5237404	5237674	peak_4581	271	+	0.561944476007	1.0	60.6109510086	peak_14745|peak_15420	utr3	rna-XM_021272418.2	72	130	105	20	46	43	90	140	164	44	68	92
BCR	NC_040061.1	6586326	6595757	peak_20748	9432	-	-0.0230167670511	1.0	60.6109510086	peak_13637|peak_14272	cds	rna-XM_027469696.1	314	686	548	294	441	333	406	512	460	401	293	337
SLITRK1	NC_040046.1	46347824	46348275	peak_10596	452	-	-0.0230180247139	1.0	60.6109510086	peak_1512|peak_1615	cds	rna-XM_027443046.1	113	300	214	78	130	85	65	85	65	37	39	29
NFIA	NC_040053.1	7437796	7437917	peak_2206	122	-	-0.0230962259249	1.0	60.6109510086	peak_9806|peak_10244	utr3	rna-XM_021274734.2	1058	1542	1716	954	1146	944	2016	2669	2210	1723	1473	1645
MTIF2	NC_040048.1	5866090	5866210	peak_14362	121	-	-0.0230167670511	1.0	60.6109510086	NA|peak_5430	utr3	rna-XM_027452971.1	17	36	38	25	26	18	21	42	14	24	19	17
NEO1	NC_040056.1	12091959	12092080	peak_362	122	+	-0.0230962259249	1.0	60.6109510086	peak_11128|peak_11609	cds	rna-XM_027465574.1	402	658	585	377	337	265	688	1254	824	576	567	656
FBXL22	NC_040056.1	14370969	14373893	peak_466	2925	-	-0.0230167670511	1.0	60.6109510086	peak_11554|peak_12071	utr3	rna-XM_021277800.1	1822	2965	2739	1707	2075	1606	733	1101	760	781	756	548
TNIP2	NC_040049.1	67176829	67177039	peak_20396	211	+	0.561943218207	1.0	60.6109510086	peak_6311|NA	utr3	rna-XM_021269978.2	26	37	43	10	17	7	54	46	49	28	17	15
ATG14	NC_040050.1	8322028	8327035	peak_6509	5008	-	-0.0230962259249	1.0	60.6109510086	peak_7679|peak_8034	cds	rna-XM_027459641.1	138	244	176	115	153	86	246	341	317	194	122	220
e0a6d6ad-c776-4ad3-84af-c6d8ed4268cc	NC_040060.1	12275106	12275255	peak_13505	150	+	-0.0230962259249	1.0	60.6109510086	NA|peak_13632,peak_13633	NP_exon	e0a6d6ad-c776-4ad3-84af-c6d8ed4268cc.trans	180	441	311	191	247	175	418	449	371	261	271	256
MSTN	NC_040052.1	8408936	8409057	peak_5122	122	+	-0.0230962259249	1.0	60.6109510086	NA|peak_9163	cds	rna-XM_005011412.4	43	120	84	77	65	44	151	197	210	148	120	118
LRRC32	NC_040046.1	2598640	2598970	peak_10111	331	-	0.561943218207	1.0	60.6109510086	peak_1280|peak_1359	cds	rna-XM_005024078.4	113	312	266	65	104	45	298	507	317	170	180	138
SOCS6	NC_040047.1	98283323	98283594	peak_9034	272	-	-0.0230180247139	1.0	60.6109510086	peak_4013|peak_4197	utr5	rna-XM_027451904.1	49	99	70	28	34	31	116	116	77	75	42	45
LOC101803845	NC_040073.1	1889670	1889761	peak_3553	92	+	0.976980717486	0.687534862081	234.909806279	peak_17056|NA	utr3	rna-XM_005022872.4	11	10	13	3	3	3	43	14	30	25	3	8
NHLRC2	NC_040051.1	8894321	8894531	peak_2990	211	-	-0.0230962259249	1.0	60.6109510086	peak_8463|peak_8861	utr3	rna-XM_027459739.1	415	603	565	332	370	277	533	648	524	469	339	381
POLR2K	NC_040047.1	134718905	134719111	peak_9471	207	+	-0.0230962259249	1.0	60.6109510086	peak_3413|peak_3552	utr5	rna-XM_005027017.3	187	329	200	134	180	83	181	224	298	146	113	121
C2H5orf22	NC_040047.1	76814923	76814984	peak_8832	62	+	0.0230180247139	1.0	60.6109510086	peak_3104|NA	cds	rna-XM_027451659.1	25	39	28	19	11	6	38	69	40	29	26	26
LOC106017580	NC_040047.1	77803211	77803331	peak_8850	121	-	-1.02317568918	0.622012251195	633.83074332	NA|peak_4097	cds	rna-XM_027451675.1	48	60	72	42	27	44	33	37	67	15	26	17
DUSP8	NC_040050.1	32093567	32093718	peak_6994	152	-	0.976903774075	1.0	60.6109510086	peak_7884|NA	utr3	rna-XM_027458128.1	303	403	369	232	175	128	71	248	156	143	76	102
PCNX4	NC_040050.1	10023687	10023898	peak_6549	212	+	-0.0230180247139	1.0	60.6109510086	peak_7008|peak_7319	cds	rna-XM_027458296.1	57	118	59	20	38	31	72	113	76	57	34	33
BOC	NC_040046.1	116394850	116394941	peak_11438	92	+	-0.0230167670511	1.0	60.6109510086	peak_600|peak_640	cds	rna-XM_027449598.1	252	502	471	293	329	204	1166	1237	1320	924	743	1008
COQ9	NC_040056.1	19385588	19385648	peak_668	61	+	-0.0230962259249	1.0	60.6109510086	NA|peak_11758	utr5	rna-XM_027465756.1	197	425	347	165	208	170	346	477	443	295	169	240
AFAP1	NC_040049.1	65165797	65167878	peak_20359	2082	-	-0.0230962259249	1.0	60.6109510086	peak_6808|peak_7086	cds	rna-XM_027457450.1	3343	7111	5016	2750	4029	2443	4534	8312	5635	3498	3883	3516
ADAMTS2	NC_040059.1	6927940	6928390	peak_16992	451	-	0.561865012757	1.0	60.6109510086	peak_12709|peak_13285,peak_13286	utr3	rna-XM_027468534.1	460	827	723	233	296	206	527	521	680	211	198	286
ROBO4	NC_040070.1	139795	140065	peak_18302	271	-	-0.0230167670511	1.0	60.6109510086	peak_16514|peak_17250	utr3	rna-XM_027444228.1	212	306	331	209	173	205	204	279	194	210	98	211
PDLIM5	NC_040049.1	8995243	8999855	peak_19514	4613	-	-0.0230962259249	1.0	60.6109510086	peak_6425|peak_6700	cds	rna-XM_027455589.1	1946	2502	2274	1940	1806	1322	1079	1160	1067	884	676	671
SOWAHB	NC_040049.1	15880772	15880923	peak_19618	152	-	-1.93005593328	0.0112119616993	54.3447416415	NA|peak_6745	utr3	rna-XM_027456070.1	57	17	47	86	119	105	38	52	36	8	47	41
LOC101790610	NC_040069.1	1301639	1302683	peak_3987	1045	+	-0.0230180247139	1.0	60.6109510086	peak_16199|peak_16922	utr3	rna-XM_027444013.1	941	1637	1335	594	688	564	1577	1859	1703	917	792	835
APOBEC2	NC_040072.1	5625107	5625196	peak_9993	90	+	0.0230167670511	1.0	60.6109510086	peak_16902|NA	cds	rna-XM_005026827.4	2314	4276	3356	2421	3510	1955	1322	1378	1401	1413	780	917
PSME3	NC_040073.1	4499430	4499768	peak_3697	339	-	-0.0230962259249	1.0	60.6109510086	peak_17304|peak_18079	cds	rna-XM_027445595.1	361	640	596	423	476	387	914	1122	938	772	632	637
COL13A1	NC_040051.1	32909922	32916901	peak_3437	6980	-	-0.0230949640235	1.0	60.6109510086	peak_8657|peak_9059	cds	rna-XM_027460493.1	578	794	711	725	704	534	701	982	701	763	803	622
JAKMIP1	NC_040049.1	63882976	63896123	peak_20334	13148	-	-0.0230962259249	1.0	60.6109510086	peak_6799|peak_7073	cds	rna-XM_027457413.1	1929	2120	2840	1352	1511	1438	505	637	480	365	390	341
FAM92A	NC_040047.1	132076142	132080449	peak_9423	4308	+	-0.0230962259249	1.0	60.6109510086	peak_3389|peak_3530	utr3	rna-XM_027452470.1	331	772	669	345	460	285	900	1233	1202	740	558	687
DUSP7	NC_040058.1	16556417	16556745	peak_1508	329	+	-0.0230962259249	1.0	60.6109510086	peak_12110|peak_12669	utr3	rna-XM_027467639.1	218	473	334	174	215	138	745	786	798	425	372	378
GPR39	NC_040052.1	34041422	34041781	peak_5688	360	-	-0.0231756891752	1.0	60.6109510086	NA|peak_9468,peak_9776	cds	rna-XM_013100310.3	16	28	26	6	15	14	169	214	147	77	60	79
CASR	NC_040046.1	121309822	121310003	peak_11561	182	+	-0.0230962259249	1.0	60.6109510086	NA|peak_688,peak_686	cds	rna-XM_027449712.1	16	40	47	27	28	16	32	42	26	20	30	16
CEP164	NC_040070.1	6547189	6559625	peak_18511	12437	+	-0.0230962259249	1.0	60.6109510086	peak_16495|peak_17239	cds	rna-XM_013096382.3	1492	3152	2675	1052	1498	959	2754	3805	3464	1680	1555	1701
CSGALNACT1	NC_040049.1	16452153	16452333	peak_19655	181	-	-0.0231744228972	1.0	60.6109510086	NA|peak_6754	cds	rna-XM_027456118.1	27	79	61	42	60	43	170	220	174	147	111	128
MEIS2	NC_040050.1	44627284	44628305	peak_7444	1022	+	-0.0230962259249	1.0	60.6109510086	peak_7431,peak_7432|peak_7775	utr5	rna-XM_027459046.1	326	651	525	225	417	214	2100	2809	2311	1559	1225	1248
KMT2A	NC_040070.1	5599808	5599929	peak_18486	122	-	-1.02309622592	0.622022411019	249.822057759	peak_16593|peak_17343	cds	rna-XM_027444106.1	97	179	98	70	152	77	143	233	366	87	156	120
MGLL	NC_040058.1	19973843	19974172	peak_1617	330	+	-0.0230962259249	1.0	60.6109510086	peak_12175|peak_12726	utr3	rna-XM_013092331.3	1049	2450	1356	671	1144	551	953	1508	1125	528	634	588
CELSR1	NC_040046.1	186914550	186914880	peak_12730	331	+	-0.0230962259249	1.0	60.6109510086	peak_1129|peak_1204	cds	rna-XM_027458791.1	123	221	196	96	116	91	195	185	160	108	92	72
TOPORS	NC_040075.1	67349092	67349303	peak_18168	212	-	-0.0230962259249	1.0	60.6109510086	peak_18318|peak_19140	cds	rna-XM_027446200.1	264	424	239	186	165	125	295	340	318	231	165	130
PDGFA	NC_040060.1	6419723	6419994	peak_13314	272	+	-0.0230962259249	1.0	60.6109510086	peak_12962|peak_13555	utr3	rna-XM_027468879.1	92	119	104	51	81	33	88	127	111	53	57	74
ALDH8A1	NC_040048.1	58778901	58779110	peak_15283	210	+	-1.39208417077	0.0136233362563	62.2459277497	NA|peak_5044	cds	rna-XM_005014086.4	4	12	8	7	2	2	10	6	14	0	0	0
PLAGL1	NC_040048.1	55066838	55067138	peak_15221	301	+	-0.0230962259249	1.0	60.6109510086	peak_4762|peak_5007	cds	rna-XM_027454415.1	47	123	63	33	55	23	133	155	149	71	64	93
EED	NC_040046.1	5830680	5833254	peak_10149	2575	+	-0.0230167670511	1.0	60.6109510086	peak_95|peak_94	cds	rna-XM_005029748.4	330	586	542	404	474	259	501	685	591	534	472	633
SKAP1	NC_040073.1	4878730	4878851	peak_3739	122	-	1.85145385988	0.0574778054095	203.530429181	peak_17313|NA	utr3	rna-XM_027445603.1	29	69	41	33	49	54	9	14	2	20	22	32
ZNF423	NC_040057.1	17142123	17142691	peak_19318	569	-	-0.0230962259249	1.0	60.6109510086	peak_11957|peak_12508	utr5	rna-XM_027467195.1	3365	6860	5121	2607	2632	2288	5628	7358	7167	3286	3196	3672
USP12	NC_040046.1	20386028	20386178	peak_10329	151	-	0.97706143416	1.0	60.6109510086	peak_1384|NA	utr3	rna-XM_027469559.1	82	173	19	87	14	17	51	85	53	41	109	35
SMG7	NC_040053.1	23631039	23635169	peak_2508	4131	-	-0.0230962259249	1.0	60.6109510086	peak_9936|peak_10368	cds	rna-XM_027463819.1	832	1610	1436	601	808	495	1983	2188	1980	1231	887	992
NTRK2	NC_040075.1	40190128	40190518	peak_17872	391	-	-1.02317695559	0.449428476863	606.262142275	peak_18161|peak_18977	utr3	rna-XM_027446761.1	34	69	72	29	37	11	27	32	20	13	5	4
CDKL1	NC_040050.1	7016530	7016680	peak_6450	151	-	-0.0231756891752	1.0	60.6109510086	peak_7658|peak_8007	cds	rna-XM_021270831.2	114	274	198	139	122	68	148	247	180	89	77	71
MARS	NC_040073.1	6103538	6103695	peak_3838	158	-	-0.507467425899	0.523750222119	654.569431466	NA|peak_18136	cds	rna-XM_027445432.1	108	276	157	147	163	160	224	607	592	764	447	557
LOC113845399	NC_040062.1	969778	970104	peak_13038	327	+	-0.0230167670511	1.0	60.6109510086	peak_13799,peak_13796|peak_14436,peak_14434	cds	rna-XM_027470525.1	4703	9135	6779	6257	3974	4505	7130	7763	7873	7467	4661	6485
TPX2	NC_040066.1	14921267	14923609	peak_6218	2343	+	-0.0230962259249	1.0	60.6109510086	peak_15452|peak_16134	cds	rna-XM_027472745.1	1775	3445	2929	1560	2048	1348	4942	6336	4752	3313	3240	2878
LOC106019821	NC_040054.1	18426687	18426778	peak_14105	92	-	1.9772178493	0.37504538695	569.162414887	peak_10528|peak_10990	cds	rna-XM_027464573.1	4	13	16	0	4	4	15	10	6	19	2	9
8014fa64-fa4b-4bfb-89eb-4a5cd62d39e4	NC_040053.1	26510525	26511181	peak_2624	657	-	-0.0230974879642	1.0	60.6109510086	peak_9974,peak_9976|peak_10416,peak_10413	NP_exon	8014fa64-fa4b-4bfb-89eb-4a5cd62d39e4.trans	298	529	454	158	212	137	563	869	706	279	303	298
NOL12	NC_040046.1	149198513	149201528	peak_12132	3016	+	-0.0230974879642	1.0	60.6109510086	peak_851|peak_915	cds	rna-XM_027450437.1	3901	7239	6513	2308	2545	2103	9633	14557	13068	5479	4805	5492
FAM53B	NC_040051.1	3803709	3814033	peak_2908	10325	+	-0.0230962259249	1.0	60.6109510086	peak_8174|peak_8568	utr3	rna-XM_027460739.1	417	677	632	289	240	448	769	685	823	415	367	527
BSN	NC_040058.1	15925820	15926009	peak_1477	190	-	0.0230167670511	1.0	60.6109510086	peak_12305|NA	cds	rna-XM_027467254.1	173	216	300	130	113	220	256	296	270	210	194	247
LOC101798558	NC_040066.1	1767676	1768244	peak_5833	569	+	-0.0230962259249	1.0	60.6109510086	peak_15280|peak_15966	cds	rna-XM_027442794.1	726	1649	1144	673	862	663	1001	1224	986	697	661	639
CELSR1	NC_040046.1	187065042	187066515	peak_12731	1474	+	-0.0230962259249	1.0	60.6109510086	peak_1130|peak_1205	cds	rna-XM_027458791.1	1463	2222	1998	976	1087	866	1284	1743	1564	874	750	762
CDKN1B	NC_040046.1	133418020	133418589	peak_11832	570	+	-0.0230974879642	1.0	60.6109510086	peak_732|peak_802	cds	rna-NM_001310406.1	5117	9541	6672	3294	3704	2477	4482	4660	5007	2218	1683	2183
ABLIM3	NC_040055.1	874330	875639	peak_16391	1310	-	-0.0230167670511	1.0	60.6109510086	peak_10769|peak_11245	cds	rna-XM_027465102.1	1561	2988	2586	1645	1887	1558	563	798	570	537	491	407
LOC101795955	NW_020865716.1	59592	59682	peak_966	91	+	0.976983232949	1.0	60.6109510086	peak_18430|NA	cds	rna-XM_027447936.1	24	50	55	22	25	17	15	19	24	22	20	17
DNAJB2	NC_040052.1	27365759	27365907	peak_5563	149	-	-0.0230167670511	1.0	60.6109510086	peak_9321|peak_9727	utr3	rna-XM_027462316.1	248	485	338	265	223	240	243	443	332	314	217	330
NAB1	NC_040052.1	8236556	8237698	peak_5111	1143	-	-0.0230962259249	1.0	60.6109510086	peak_9166|peak_9558	utr3	rna-XM_027460939.1	426	763	763	308	434	328	1077	1158	972	747	570	535
ABTB2	NC_040050.1	52764043	52764224	peak_7570	182	-	-0.0230962259249	1.0	60.6109510086	NA|peak_8481	utr3	rna-XM_027458334.1	13	27	19	10	15	11	118	141	105	94	82	69
MAFF	NC_040046.1	149341763	149342272	peak_12158	510	+	-0.0230192825141	1.0	60.6109510086	peak_866|peak_929	utr3	rna-XM_027450542.1	1849	3585	2547	1110	674	750	2394	2515	2575	1220	743	923
ATP10A	NC_040046.1	66859964	66860412	peak_10826	449	-	-1.02317568918	0.622012251195	633.83074332	peak_1634|peak_1733	cds	rna-XM_027446771.1	29	42	42	14	38	23	124	163	130	61	54	58
LOC113841502	NW_020866067.1	2994	3114	peak_3473	121	+	0.976981975286	1.0	60.6109510086	peak_18477|NA	cds	rna-XM_027448166.1	29	35	33	18	15	12	49	59	60	37	16	46
PHRF1	NC_040050.1	50041748	50042077	peak_7504	330	+	-0.0230962259249	1.0	60.6109510086	peak_7465|peak_7808	cds	rna-XM_027458126.1	2010	3441	2906	1381	1724	1297	2354	3188	2846	1584	1310	1404
HIP1R	NC_040061.1	11888648	11890487	peak_20970	1840	-	-0.0230962259249	1.0	60.6109510086	peak_13740,peak_13741|peak_14383	cds	rna-XM_027469804.1	1203	1852	1622	934	1166	831	1437	1581	1272	1035	875	829
CALHM2	NC_040051.1	13316346	13316526	peak_3054	181	+	0.392016958827	1.0	60.6109510086	peak_8238|peak_8639	utr3	rna-XM_005026464.4	14	74	20	5	13	7	36	42	91	27	11	16
ITGB1	NC_040047.1	14817342	14821131	peak_8071	3790	+	-0.0230962259249	1.0	60.6109510086	peak_2773|peak_2900	cds	rna-XM_027450535.1	1968	3762	3222	1561	2554	1544	2640	3253	2648	2142	1828	1901
METTL2A	NC_040073.1	1989002	1989272	peak_3557	271	+	-1.02309622592	0.622022411019	249.822057759	peak_17057|peak_17803	cds	rna-XM_027445793.1	194	313	267	148	201	131	320	432	426	209	200	204
TRIM13	NC_040046.1	27513380	27513560	peak_10452	181	-	-0.0230962259249	1.0	60.6109510086	peak_1446|peak_1539	cds	rna-XM_027471296.1	148	227	217	137	153	120	242	274	266	151	175	204
MED8	NC_040053.1	15779521	15781496	peak_2383	1976	+	-0.0230962259249	1.0	60.6109510086	NA|peak_9947	cds	rna-XM_027462518.1	30	68	56	21	60	35	54	78	65	45	34	52
CNTRL	NC_040063.1	9337310	9338478	peak_18963	1169	+	-1.02309622592	0.622022411019	249.822057759	peak_14005|peak_14648	cds	rna-XM_027471188.1	432	766	625	331	448	287	814	962	824	528	405	488
UBE2V2	NC_040047.1	110591757	110598727	peak_9180	6971	-	-0.0230949640235	1.0	60.6109510086	NA|peak_4261	cds	rna-XM_027452104.1	163	279	229	193	250	166	269	322	337	266	277	289
ATRX	NC_040055.1	5009491	5010422	peak_16493	932	-	-0.0230962259249	1.0	60.6109510086	peak_10809,peak_10810|peak_11290	cds	rna-XM_027464969.1	2542	5727	4428	2113	3412	2122	5709	6309	5500	4367	3092	3295
LIF	NC_040061.1	9874938	9875058	peak_20889	121	-	-1.02309622592	0.622022411019	249.822057759	NA|peak_14346	cds	rna-XM_027470145.1	57	110	7	75	42	3	151	108	116	94	4	93
MTMR4	NC_040074.1	3776847	3785120	peak_1157	8274	+	0.976903774075	1.0	60.6109510086	peak_17418|peak_18193	utr5	rna-XM_021269820.2	214	391	333	143	242	144	604	236	637	373	282	394
TCEANC	NC_040046.1	76344420	76344689	peak_10930	270	+	0.976981975286	1.0	60.6109510086	peak_396|NA	cds	rna-XM_005015159.4	36	48	54	15	27	22	31	41	59	26	34	27
HOXA6	NC_040047.1	35007298	35007389	peak_8353	92	-	-0.0230962259249	1.0	60.6109510086	NA|peak_3870	utr5	rna-XM_005022081.4	147	340	306	152	211	168	515	647	449	373	374	273
LOC101804293	NC_040069.1	3648178	3648268	peak_4126	91	-	-0.0230949640235	1.0	60.6109510086	NA|peak_17130	cds	rna-XM_027443811.1	61	77	59	75	83	36	109	149	161	125	85	109
NUDT4	NC_040046.1	155741965	155763969	peak_12304	22005	+	-0.0230962259249	1.0	60.6109510086	peak_917|peak_999	cds	rna-XM_027451938.1	6717	12932	8991	5354	7426	4548	6601	9221	7445	4728	4466	4444
SV2C	NC_040075.1	24013738	24013889	peak_17689	152	-	-0.561944476007	1.0	60.6109510086	NA|peak_18901,peak_18902	utr3	rna-XM_027446670.1	5	6	0	0	0	4	43	86	54	29	43	23
LHFPL4	NC_040058.1	21876944	21877183	peak_1671	240	-	-0.0231744228972	1.0	60.6109510086	peak_12388|peak_12953	utr3	rna-XM_027467347.1	268	249	197	225	194	187	482	463	191	193	351	260
TOR3A	NC_040053.1	25178589	25178949	peak_2558	361	+	0.976903774075	1.0	60.6109510086	peak_9619|peak_10039	cds	rna-XM_021272304.2	475	689	684	364	347	289	558	655	593	414	338	395
BNIP1	NC_040059.1	11945795	11946421	peak_17166	627	-	-0.0230180247139	1.0	60.6109510086	peak_12776,peak_12777|peak_13358	utr3	rna-XM_027468294.1	279	590	457	175	231	169	560	629	679	379	226	317
TIPIN	NC_040056.1	2256833	2257012	peak_108	180	+	-1.02309622592	0.622022411019	249.822057759	NA|peak_11492	utr3	rna-XM_027466492.1	104	259	134	109	170	88	239	238	254	158	96	138
LSM14B	NC_040066.1	12264911	12266624	peak_6102	1714	+	-0.0230962259249	1.0	60.6109510086	peak_15397|peak_16081	cds	rna-XM_027472847.1	2760	5465	4563	2660	3687	2528	4994	6503	5317	3919	3535	3760
MIER3	NC_040075.1	17971411	17971651	peak_17600	241	-	-0.608138189896	0.685021782428	249.71257932	peak_18046|peak_18863	cds	rna-XM_027446671.1	61	102	88	33	47	40	118	122	109	36	52	45
GFOD2	NC_040056.1	19057231	19057561	peak_644	331	-	0.976981975286	1.0	60.6109510086	peak_11636|peak_12151	utr3	rna-XM_027465666.1	120	215	135	61	88	51	140	233	235	114	120	122
LOC101792751	NC_040064.1	1950721	1953166	peak_1812	2446	-	-0.0230962259249	1.0	60.6109510086	peak_14470|peak_15133	cds	rna-XM_027471406.1	491	949	778	375	462	395	1011	1389	1289	682	645	788
TIPRL	NC_040046.1	115578956	115581506	peak_11420	2551	+	-0.0230962259249	1.0	60.6109510086	peak_597|peak_636	cds	rna-XM_027449560.1	524	1070	852	441	695	431	961	1093	966	757	564	658
LRRC38	NC_040067.1	2598533	2598744	peak_16127	212	+	0.0230962259249	1.0	60.6109510086	peak_15791|NA	NP_exon	rna-XR_003492309.1	46	29	29	30	13	10	14	30	34	22	8	5
GPSM1	NC_040063.1	8775797	8775978	peak_18942	182	-	-1.02309622592	0.622022411019	249.822057759	NA|peak_14862	utr3	rna-XM_021274599.2	20	72	83	13	52	56	135	138	235	87	81	110
NUTF2	NC_040056.1	18642945	18643210	peak_622	266	-	-0.0230962259249	1.0	60.6109510086	peak_11624|peak_12140	utr3	rna-XM_013108661.3	778	1585	1178	683	911	699	1915	2490	2139	1542	1301	1377
NRG3	NC_040051.1	27733662	27734083	peak_3342	422	+	-0.608139456313	0.685021649249	256.158615462	peak_8366|peak_8765	utr3	rna-XM_027459940.1	20	36	29	22	11	7	204	202	350	68	50	105
LOC101794193	NW_020865937.1	57273	57574	peak_1222	302	-	-0.0230180247139	1.0	60.6109510086	peak_18459|peak_19277	utr3	rna-XM_027448097.1	173	305	237	112	115	98	98	148	92	74	45	56
RNF216	NC_040060.1	3870140	3870351	peak_13228	212	+	-0.0230962259249	1.0	60.6109510086	peak_12911|peak_13505	cds	rna-XM_013100160.3	171	290	212	118	170	152	315	454	252	210	269	118
FADS2	NC_040050.1	58071759	58072058	peak_7675	300	-	-0.0230974879642	1.0	60.6109510086	peak_8141|peak_8524	cds	rna-XM_005024260.2	287	620	281	147	265	130	1110	986	1458	567	316	642
GATD3A	NC_040046.1	80862264	80863061	peak_11031	798	+	-0.0230167670511	1.0	60.6109510086	peak_441|peak_465	cds	rna-XM_027448858.1	1311	2264	2001	1342	1857	1197	2086	2888	2372	1912	1620	1841
NSDHL	NC_040049.1	10073263	10073323	peak_19524	61	+	-1.0231744229	0.622012413086	551.406443858	NA|peak_6211	utr3	rna-XM_027456354.1	10	34	20	22	33	12	87	122	86	53	65	34
LOC113842107	NW_020866863.1	5966	6145	peak_15989	180	+	1.56194447601	0.625027888113	238.76730654	peak_18560|NA	utr3	rna-XM_027448792.1	15	23	35	12	7	7	48	38	38	32	4	40
LOC101793731	NC_040075.1	51405508	51418448	peak_18011	12941	-	-0.0230962259249	1.0	60.6109510086	peak_18230,peak_18231|peak_19063	cds	rna-XM_027446336.1	5011	9800	7609	4127	5858	3798	13151	16552	14150	9478	8148	9199
LOC101794093	NC_040047.1	94277741	94278693	peak_8985	953	-	-0.0230974879642	1.0	60.6109510086	peak_3991,peak_3989|peak_4173,peak_4174	utr3	rna-XM_027451865.1	570	1029	702	341	429	269	1720	2117	1841	758	867	808
HIVEP1	NC_040047.1	63500302	63500643	peak_8749	342	-	-0.976981975286	1.0	60.6109510086	NA|peak_4045	utr5	rna-XM_027451472.1	40	100	66	37	33	23	60	78	79	62	27	45
CLK1	NC_040052.1	4668545	4670167	peak_5058	1623	+	-0.0230167670511	1.0	60.6109510086	peak_8734|peak_9131	cds	rna-XM_027461905.1	972	1880	1399	897	1319	716	1108	1359	1350	1002	789	1045
UBE3A	NC_040046.1	66722246	66729598	peak_10823	7353	-	-0.0230167670511	1.0	60.6109510086	NA|peak_1730	cds	rna-XM_013104460.3	483	1050	680	578	723	471	731	896	855	588	552	666
BRCA1	NC_040073.1	4388081	4388625	peak_3680	545	+	0.0230167670511	1.0	60.6109510086	peak_17127|NA	cds	rna-XM_027445404.1	151	207	188	92	168	90	358	368	336	352	219	261
ATP1B1	NC_040046.1	115919616	115919857	peak_11422	242	+	-0.0230962259249	1.0	60.6109510086	peak_598|peak_637	utr3	rna-NM_001310386.1	1808	2822	2240	1715	1762	1235	1065	1039	1173	718	642	720
TET2	NC_040049.1	5723889	5724070	peak_19461	182	-	-0.0230962259249	1.0	60.6109510086	NA|peak_6687	cds	rna-XM_027456819.1	67	104	102	64	73	38	115	126	111	62	70	80
SASH1	NC_040048.1	50142678	50145502	peak_15120	2825	+	-0.0230962259249	1.0	60.6109510086	peak_4693|peak_4936	cds	rna-XM_027454340.1	613	1238	946	581	411	403	946	981	749	535	370	386
ZNF518A	NC_040051.1	16011321	16011502	peak_3144	182	-	-0.0230962259249	1.0	60.6109510086	NA|peak_8949	cds	rna-XM_021268233.2	99	246	180	103	185	87	203	264	252	158	141	157
ed91fc62-9e60-417b-9e84-b0860ac87e71	NC_040051.1	13878947	13880348	peak_3080	1402	+	-0.0230962259249	1.0	60.6109510086	peak_8244,peak_8246|peak_8645,peak_8646	NP_exon	ed91fc62-9e60-417b-9e84-b0860ac87e71.trans	2142	3308	3154	1671	1507	1484	3491	3945	3765	2225	1884	2241
WIZ	NC_040071.1	1350178	1350299	peak_946	122	+	-0.976983232949	1.0	60.6109510086	NA|peak_17430	cds	rna-XM_027444447.1	48	95	103	48	23	53	85	118	51	83	60	67
SUPT6H	NC_040065.1	10335517	10335913	peak_4845	397	-	-0.0230962259249	1.0	60.6109510086	peak_15207|peak_15884	cds	rna-XM_005009888.4	729	1359	1253	778	925	636	1357	1694	1644	1169	978	1158
TNFRSF25	NC_040067.1	6423270	6424154	peak_16293	885	+	-0.0230192825141	1.0	60.6109510086	peak_15868|peak_16567	cds	rna-XM_027443444.1	556	1315	906	350	200	274	1044	1065	1255	461	290	367
ZEB1	NC_040047.1	15181404	15181914	peak_8085	511	-	-0.0230962259249	1.0	60.6109510086	peak_3585|peak_3738	cds	rna-XM_021277730.2	908	1502	1279	859	1120	619	892	1142	946	762	592	649
MMAA	NC_040049.1	34772381	34772472	peak_19889	92	-	2.4364322508	0.0225122147438	94.4009382216	peak_6595|NA	utr3	rna-XM_027456693.1	3	8	3	1	13	0	1	5	2	23	7	16
UBN2	NC_040046.1	160181038	160182281	peak_12399	1244	+	-0.0230167670511	1.0	60.6109510086	peak_972|peak_1053	cds	rna-XM_027453562.1	169	289	248	159	206	158	217	274	214	226	144	192
BZW2	NC_040047.1	30606790	30620827	peak_8293	14038	+	-0.0230962259249	1.0	60.6109510086	peak_2889|peak_3002	utr5	rna-XM_005015131.4	896	1636	1252	842	1035	705	1501	1859	1785	1133	1122	1324
FOXA2	NC_040048.1	4893877	4894028	peak_14309	152	-	-1.37682676299	0.0128858725319	60.391608688	NA|peak_5411	cds	rna-XM_027453178.1	13	35	0	19	20	16	123	105	102	48	43	74
FLOT2	NC_040065.1	10238111	10238580	peak_4828	470	+	-0.0230167670511	1.0	60.6109510086	NA|peak_15526	cds	rna-XM_027472665.1	683	992	700	622	682	506	1031	1379	1053	819	792	873
C1H12orf50	NC_040046.1	153578105	153579847	peak_12263	1743	+	-0.0230949640235	1.0	60.6109510086	peak_915|peak_995	utr5	rna-XM_027451678.1	399	578	445	434	478	308	711	908	746	576	609	572
LZTS1	NC_040068.1	770780	771406	peak_1014	627	+	-0.0230180247139	1.0	60.6109510086	peak_16085|peak_16798	utr3	rna-XM_027443610.1	2814	4255	3577	1949	1680	1350	1813	1604	2159	946	660	1014
KIFC3	NC_040056.1	19259831	19259892	peak_655	62	+	0.0230949640235	1.0	60.6109510086	peak_11246|NA	utr5	rna-XM_027465831.1	43	74	68	60	52	42	60	73	72	73	64	89
DTX3L	NC_040052.1	36009618	36009709	peak_5705	92	+	0.0231744228972	1.0	60.6109510086	peak_9088|NA	cds	rna-XM_027462226.1	6	17	14	14	24	2	27	14	23	9	8	21
GMPS	NC_040054.1	1290243	1292899	peak_13660	2657	+	0.0230962259249	1.0	60.6109510086	peak_10081|NA	cds	rna-XM_027464497.1	374	614	467	312	356	293	554	955	968	529	557	634
TMF1	NC_040058.1	5312839	5313918	peak_1310	1080	+	0.976903774075	1.0	60.6109510086	peak_12026|peak_12572	utr3	rna-XM_027467825.1	244	382	385	169	216	166	328	346	407	252	155	220
HACE1	NC_040048.1	72662933	72663024	peak_15451	92	+	-0.0230962259249	1.0	60.6109510086	peak_4879|peak_5114	utr5	rna-XM_027454781.1	72	90	77	36	69	32	79	100	107	58	48	72
KAT6A	NC_040068.1	2229965	2230894	peak_1079	930	-	-0.0230962259249	1.0	60.6109510086	peak_16165,peak_16166|peak_16881	cds	rna-XM_027443577.1	1338	2308	1785	905	1031	824	1894	2274	2308	1161	1116	1288
WDR77	NC_040072.1	1550190	1550310	peak_9769	121	-	-0.0230962259249	1.0	60.6109510086	peak_16935|peak_17684	cds	rna-XM_027444781.1	381	862	620	371	410	391	1084	1268	1061	735	846	451
N4BP2L2	NC_040046.1	22261154	22280825	peak_10372	19672	-	-0.0230167670511	1.0	60.6109510086	peak_1403|peak_1496	cds	rna-XM_027470078.1	300	588	587	372	463	353	384	481	380	383	380	330
FBN3	NC_040065.1	2079531	2104141	peak_4346	24611	+	-0.0230962259249	1.0	60.6109510086	peak_14622|peak_15301	cds	rna-XM_027472063.1	380	908	742	321	529	432	2552	3329	3269	1750	1739	2084
RNMT	NC_040047.1	101577077	101579063	peak_9048	1987	-	-0.0230962259249	1.0	60.6109510086	peak_4020|peak_4203	utr3	rna-XM_027451925.1	279	549	448	246	358	238	618	800	812	526	523	485
GVQW3	NW_020865200.1	91309	91521	peak_4195	213	-	-1.0231744229	0.622012413086	551.406443858	NA|peak_19205	cds	rna-XM_027447435.1	35	32	35	27	34	27	45	70	93	25	27	49
TMEM178B	NC_040046.1	143005254	143005525	peak_11992	272	-	-0.561943218207	1.0	60.6109510086	NA|peak_2326	utr3	rna-XM_027446340.1	2	14	16	4	3	3	31	62	53	16	22	23
SUMF1	NC_040058.1	1854078	1854378	peak_1269	301	+	-0.0230962259249	1.0	60.6109510086	peak_12001|peak_12550	utr3	rna-XM_027467552.1	93	193	142	81	95	53	179	285	288	119	128	123
DIAPH3	NC_040046.1	34417897	34437537	peak_10535	19641	-	-0.0230962259249	1.0	60.6109510086	peak_1475|peak_1571	cds	rna-XM_027472667.1	186	423	274	135	215	77	309	453	432	214	160	188
THOC2	NC_040055.1	2721604	2722863	peak_16423	1260	+	-0.0230180247139	1.0	60.6109510086	peak_10590|peak_11064	cds	rna-XM_027465360.1	4520	8909	7316	2714	3821	2571	7879	10791	8612	4979	3685	3873
PPP1R12B	NC_040072.1	2833905	2836210	peak_9833	2306	-	-0.0230962259249	1.0	60.6109510086	peak_16950|peak_17699	cds	rna-XM_027444963.1	2025	3595	3463	1663	2029	1704	1807	2769	2300	1665	1174	1661
ZGPAT	NC_040066.1	14439907	14440682	peak_6184	776	-	-0.0230974879642	1.0	60.6109510086	peak_15675|peak_16382	cds	rna-XM_005028018.4	2802	5308	3817	1514	1697	1228	4049	5687	6236	1935	1908	2310
FOXK1	NC_040060.1	4119406	4120096	peak_13253	691	-	-0.0230962259249	1.0	60.6109510086	peak_13187|peak_13799,peak_13800	utr3	rna-XM_027469492.1	317	593	485	264	268	224	504	602	460	277	291	254
SHLD2	NC_040051.1	28524341	28524432	peak_3353	92	-	-1.0231744229	0.622012413086	551.406443858	NA|peak_9032	cds	rna-XM_027460001.1	7	48	57	35	31	26	55	62	49	29	28	37
LOC110354169	NC_040055.1	11307162	11307579	peak_16662	418	-	-0.0230180247139	1.0	60.6109510086	peak_10888|peak_11361	utr3	rna-XM_027464930.1	237	446	396	158	174	133	469	476	501	282	303	209
GNAZ	NC_040061.1	6749373	6749554	peak_20752	182	-	-0.608059988685	0.685029977553	239.444841452	NA|peak_14277	cds	rna-XM_013106164.3	7	34	21	5	15	6	29	51	50	11	16	20
LOC101794123	NC_040075.1	37796024	37796115	peak_17861	92	-	-0.0230180247139	1.0	60.6109510086	peak_18153|peak_18972	cds	rna-XM_027446756.1	273	504	379	156	182	171	471	597	523	260	212	268
GLCE	NC_040056.1	1242382	1243370	peak_86	989	-	-0.0230180247139	1.0	60.6109510086	peak_11363|peak_11877	utr3	rna-XM_027465844.1	769	1484	984	520	566	441	2010	2269	2010	976	961	981
FEM1C	NC_040075.1	58308593	58318626	peak_18076	10034	+	-1.02309622592	0.622022411019	249.822057759	peak_17826|peak_18631	cds	rna-XM_027446287.1	635	882	814	526	527	433	484	560	581	302	244	364
CFAP36	NC_040048.1	5986371	5986521	peak_14375	151	+	-0.0230167670511	1.0	60.6109510086	peak_4375|peak_4583	cds	rna-XM_027453251.1	642	1017	685	626	595	381	849	971	941	727	617	699
GJA8	NC_040046.1	107378044	107378165	peak_11284	122	-	1.6081381899	0.371038958738	572.626096768	peak_1830|NA	utr5	rna-XM_021271024.2	258	448	351	230	273	185	19	31	24	12	1	14
ZNF830	NC_040047.1	89840648	89850735	peak_8928	10088	-	0.976903774075	1.0	60.6109510086	peak_3967,peak_3968|peak_4140	cds	rna-XM_027451811.1	2119	3601	3012	1545	2061	1342	3784	4341	3754	2786	1977	2194
OSBPL11	NC_040052.1	27491351	27491622	peak_5571	272	+	-0.0230962259249	1.0	60.6109510086	peak_9029|peak_9413	cds	rna-XM_027462321.1	209	402	376	196	303	165	419	531	461	272	285	295
SINHCAF	NC_040046.1	140596961	140604301	peak_11957	7341	-	0.977138390426	0.687534042138	238.424222522	peak_2187|peak_2309	utr5	rna-XM_027470077.1	52	99	55	18	18	16	100	88	156	87	39	33
ANTXRL	NC_040051.1	19571013	19571222	peak_3218	210	+	-0.0230962259249	1.0	60.6109510086	peak_8298|peak_8704	utr5	rna-XM_013102144.3	142	289	244	114	183	167	359	360	379	218	221	233
GTPBP6	NC_040046.1	68650977	68651333	peak_10851	357	-	0.976903774075	1.0	60.6109510086	peak_1646|peak_1747	utr3	rna-XM_005021242.4	121	220	224	84	90	95	166	156	188	83	116	106
MBD3	NC_040065.1	1121914	1122184	peak_4294	271	+	0.976903774075	1.0	60.6109510086	peak_14596|peak_15274	utr3	rna-XM_027472001.1	799	1668	1362	587	814	548	1724	2567	2097	1468	1175	1196
MERTK	NC_040048.1	5079959	5080379	peak_14332	421	-	-0.0230962259249	1.0	60.6109510086	peak_5170|peak_5423	utr3	rna-XM_027453186.1	140	300	154	69	119	98	389	392	349	158	166	203
RTF2	NC_040066.1	9606200	9606351	peak_6062	152	+	1.02317568918	0.622012251195	633.83074332	peak_15374|NA	utr5	rna-XM_005010411.4	23	37	25	31	13	8	8	18	2	3	3	6
ZGRF1	NC_040049.1	3065663	3066623	peak_19413	961	+	-0.0230974879642	1.0	60.6109510086	peak_5889|peak_6138	cds	rna-XM_013098571.3	149	368	274	104	190	78	294	419	299	172	160	116
LOC101793684	NC_040047.1	132560357	132560418	peak_9440	62	+	-1.02309622592	0.622022411019	249.822057759	NA|peak_3535	cds	rna-XM_027452482.1	3	17	13	10	6	4	11	16	16	1	6	14
CENPJ	NC_040046.1	17381857	17381978	peak_10274	122	-	-1.02309622592	0.622022411019	249.822057759	NA|peak_1437	cds	rna-XM_005014588.4	28	44	72	30	37	21	70	94	84	30	42	66
LOC101801770	NC_040052.1	18504718	18505078	peak_5335	361	+	-0.0230180247139	1.0	60.6109510086	peak_8877|peak_9275	cds	rna-XM_027461111.1	172	417	316	77	210	105	337	445	386	230	196	194
BBX	NC_040046.1	112715710	112716045	peak_11381	336	-	0.0230974879642	1.0	60.6109510086	peak_1879|NA	utr5	rna-XM_027449500.1	107	205	151	99	60	52	118	179	148	94	36	62
EIF4E	NC_040049.1	7293729	7293790	peak_19509	62	+	0.0230167670511	1.0	60.6109510086	peak_5946|NA	cds	rna-XM_013104108.3	288	461	323	257	366	205	483	687	501	495	433	434
UIMC1	NC_040059.1	10781089	10781719	peak_17120	631	-	-0.0230962259249	1.0	60.6109510086	peak_12767|peak_13348	cds	rna-XM_027468072.1	807	1332	1221	637	658	574	1534	1841	1632	879	675	865
APOLD1	NC_040046.1	159287909	159288118	peak_12381	210	+	-0.0230962259249	1.0	60.6109510086	peak_960|peak_1038	utr3	rna-XM_005012176.4	91	186	201	74	110	96	144	146	154	107	77	79
C15H7orf50	NC_040060.1	6021535	6050953	peak_13303	29419	+	-1.02309622592	0.622022411019	249.822057759	peak_12955|peak_13545	cds	rna-XM_027468889.1	339	335	541	162	368	222	859	1183	323	631	470	193
RBPMS2	NC_040056.1	11089361	11100579	peak_326	11219	-	-0.0230167670511	1.0	60.6109510086	peak_11487|peak_12001	cds	rna-XM_027466101.1	636	1255	1093	737	790	764	925	1122	801	832	679	733
ARFGEF2	NC_040066.1	708029	710184	peak_5799	2156	-	0.976903774075	1.0	60.6109510086	peak_15511|peak_16196	cds	rna-XM_027473199.1	345	679	545	229	369	249	664	829	746	489	383	459
LOC101793805	NW_020866936.1	117272	144310	peak_4224	27039	+	-0.0230180247139	1.0	60.6109510086	peak_18566,peak_18567,peak_18568|peak_19370	cds	rna-XM_027448862.1	1490	3087	2458	921	1372	873	2768	3520	2919	1761	1333	1359
PTPN14	NC_040048.1	22328585	22328705	peak_14719	121	-	-0.0230962259249	1.0	60.6109510086	NA|peak_5589	utr5	rna-XM_027453722.1	35	41	33	18	33	21	39	35	34	20	17	27
TGIF2	NC_040066.1	7045971	7046388	peak_5997	418	+	0.0230167670511	1.0	60.6109510086	peak_15357|NA	cds	rna-XM_027473217.1	515	1003	708	526	774	456	870	1082	1010	736	897	798
GEN1	NC_040048.1	106550548	106550748	peak_15789	201	+	-0.0230962259249	1.0	60.6109510086	peak_5029|peak_5270	utr5	rna-XM_013095367.3	46	74	66	44	47	23	90	116	115	69	65	72
LOC101794490	NC_040057.1	13707251	13707731	peak_19272	481	+	0.561865012757	1.0	60.6109510086	peak_11805|peak_12334	NP_exon	gene-LOC101794490.trans	152	279	290	92	106	72	212	310	317	119	76	134
ZBTB6	NC_040063.1	9814575	9814785	peak_18992	211	-	0.976981975286	1.0	60.6109510086	peak_14221|NA	cds	rna-XM_013108512.3	29	34	45	11	31	8	30	69	56	23	25	58
KLHL2	NC_040049.1	27568029	27573166	peak_19802	5138	-	0.976903774075	1.0	60.6109510086	peak_6552|peak_6822	cds	rna-XM_005016575.4	295	525	455	199	311	211	666	549	595	529	274	372
CROCC	NC_040067.1	1022896	1028906	peak_16064	6011	+	-0.0230180247139	1.0	60.6109510086	peak_15770|peak_16480,peak_16481,peak_16482	cds	rna-XM_027443056.1	2042	3511	3031	1436	1086	1217	4407	3364	3723	2399	1513	1607
SNAI2	NC_040047.1	110222694	110222874	peak_9177	181	+	-0.0230962259249	1.0	60.6109510086	peak_3255|peak_3389	cds	rna-XM_005010199.4	147	294	253	115	171	157	528	633	490	409	318	319
NFATC2	NC_040066.1	7961763	7961944	peak_6034	182	-	-0.0231744228972	1.0	60.6109510086	NA|peak_16312	utr3	rna-XM_021276715.2	32	57	65	44	54	28	114	141	98	65	75	83
TUBB6	NC_040047.1	108196785	108197559	peak_9155	775	+	-0.0230962259249	1.0	60.6109510086	peak_3241|peak_3380	utr3	rna-XM_027452070.1	4958	9087	8498	3439	4670	3454	5546	7975	6794	3318	3590	3887
MARK3	NC_040050.1	14685800	14691325	peak_6668	5526	-	-0.0230974879642	1.0	60.6109510086	peak_7731|peak_8090	cds	rna-XM_027459523.1	233	425	356	128	152	111	383	486	393	269	116	168
LOC101790919	NC_040062.1	871811	872021	peak_13032	211	+	0.976903774075	1.0	60.6109510086	peak_13789|NA	cds	rna-XM_027470489.1	135	173	166	86	77	88	82	121	208	142	36	94
699af3e7-2089-4934-97d0-df299b346620	NC_040047.1	79530997	79531797	peak_8874	801	-	-0.0230962259249	1.0	60.6109510086	peak_3938,peak_3936|peak_4114,peak_4115	NP_exon	699af3e7-2089-4934-97d0-df299b346620.trans	1526	3434	2474	1072	1504	1208	1845	2680	1914	1103	1153	942
BRD3OS	NC_040063.1	6129365	6129785	peak_18759	421	-	-1.02309622592	0.622022411019	249.822057759	peak_14130|peak_14777	utr3	rna-XM_027470585.1	299	290	355	273	216	174	333	425	364	123	157	227
B3GNT5	NC_040054.1	8768701	8769707	peak_13773	1007	+	0.976903774075	1.0	60.6109510086	peak_10130|peak_10591	utr5	rna-XM_027464355.1	41	66	60	42	26	21	117	166	151	93	73	90
DNTTIP2	NC_040053.1	35386256	35388478	peak_2820	2223	+	0.976903774075	1.0	60.6109510086	peak_9738|peak_10176	cds	rna-XM_027462911.1	912	1627	1213	611	857	554	1326	1997	1628	1057	973	1152
DNMBP	NC_040051.1	14930751	14931111	peak_3123	361	-	-1.02309622592	0.622022411019	249.822057759	peak_8532|peak_8935	utr3	rna-XM_027459872.1	151	228	198	106	135	96	255	292	265	152	135	168
TANC2	NC_040073.1	2405494	2405615	peak_3568	122	+	-0.0231744228972	1.0	60.6109510086	NA|peak_17812	utr3	rna-XM_027445760.1	93	128	169	120	112	85	105	213	162	73	115	121
TBC1D9B	NC_040059.1	7328599	7328690	peak_17008	92	-	0.0230167670511	1.0	60.6109510086	peak_12715|NA	utr3	rna-XM_027468571.1	159	225	176	124	152	122	253	249	177	155	190	168
GPATCH8	NC_040073.1	993459	993670	peak_3519	212	-	0.976903774075	1.0	60.6109510086	peak_17245|peak_18004	cds	rna-XM_005021745.4	480	853	665	333	500	300	533	918	834	412	422	520
HEATR3	NC_040057.1	17188401	17189853	peak_19319	1453	+	-0.0230962259249	1.0	60.6109510086	peak_11817|peak_12345	cds	rna-XM_027467208.1	418	724	566	280	488	331	801	977	920	544	536	561
ANKRD44	NC_040052.1	5960476	5960716	peak_5083	241	+	-0.0230962259249	1.0	60.6109510086	peak_8748|peak_9142	utr3	rna-XM_027461803.1	506	834	917	420	473	530	403	683	546	396	330	340
7075ec76-9530-4f11-9cda-cb00960dad09	NC_040049.1	75136362	75136514	peak_20541	153	+	0.976903774075	1.0	60.6109510086	peak_6359,peak_6361|peak_6644,peak_6646	NP_exon	7075ec76-9530-4f11-9cda-cb00960dad09.trans	89	206	170	96	77	69	798	660	571	629	340	355
LUZP2	NC_040050.1	59833584	59833762	peak_7696	179	+	-1.02309622592	0.622022411019	249.822057759	NA|peak_7894	cds	rna-XM_027458139.1	10	50	41	8	37	14	105	151	174	76	66	105
EIF4A3	NC_040048.1	15873818	15873968	peak_14552	151	-	-0.0230962259249	1.0	60.6109510086	peak_5265|peak_5515	cds	rna-XM_027453500.1	6158	12184	9329	4743	6222	4298	9572	13396	11098	6263	6383	6396
MED1	NC_040073.1	3735794	3736035	peak_3646	242	+	-0.0230962259249	1.0	60.6109510086	peak_17110|peak_17853	utr3	rna-XM_027445646.1	264	566	539	265	327	268	529	694	593	334	458	499
KIF23	NC_040056.1	1215990	1216591	peak_85	602	-	-0.0230962259249	1.0	60.6109510086	peak_11362|peak_11876	cds	rna-XM_027466275.1	335	538	358	245	380	165	638	870	754	599	374	446
TBC1D2	NC_040075.1	63765962	63766713	peak_18149	752	+	0.0230962259249	1.0	60.6109510086	peak_17866|NA	cds	rna-XM_027446794.1	41	71	70	38	46	30	39	120	73	38	63	47
LOC113839637	NW_020866752.1	1004	1948	peak_816	945	+	0.0230180247139	1.0	60.6109510086	peak_18541|NA	cds	rna-XM_027448697.1	2433	3671	2763	1363	1662	1060	514	604	488	284	222	254
IGFN1	NC_040072.1	3078753	3078814	peak_9845	62	-	0.0230974879642	1.0	60.6109510086	peak_16955|NA	cds	rna-XM_027444936.1	307	893	684	174	315	221	289	425	372	119	95	160
KPNA1	NC_040046.1	121438655	121452479	peak_11569	13825	-	-0.0230962259249	1.0	60.6109510086	peak_1995|peak_2099	cds	rna-XM_027449713.1	567	1036	848	442	691	320	1061	1287	1097	862	745	809
DDOST	NC_040067.1	763037	763218	peak_16034	182	+	0.0230167670511	1.0	60.6109510086	peak_15745|NA	utr3	rna-XM_027443143.1	1733	4415	2595	1350	2904	1550	4402	7279	4108	4419	4209	3117
LOC113840377	NC_040075.1	50386346	50386616	peak_18004	271	-	-0.0230974879642	1.0	60.6109510086	peak_18226|peak_19058	cds	rna-XM_027447059.1	51	103	62	20	21	33	41	71	48	15	21	22
AKAP11	NC_040046.1	30380805	30381256	peak_10506	452	-	0.976903774075	1.0	60.6109510086	peak_1468|peak_1559	cds	rna-XM_027472273.1	160	296	213	110	154	96	251	270	285	169	165	199
C8H1orf52	NC_040053.1	19392993	19395008	peak_2439	2016	-	-0.0230962259249	1.0	60.6109510086	peak_9906|peak_10337	utr3	rna-XM_027462840.1	965	1568	1427	838	1046	731	1631	1915	1810	1100	1052	1077
LOC101790674	NC_040073.1	6579110	6579291	peak_3860	182	+	-0.0230180247139	1.0	60.6109510086	NA|peak_17977	utr3	rna-XM_013101423.2	6	30	33	18	10	2	550	781	483	329	381	300
EXTL3	NC_040048.1	116211629	116212139	peak_15907	511	-	-0.0230962259249	1.0	60.6109510086	peak_5846|peak_6089	cds	rna-XM_027455435.1	2023	3029	2613	1358	1406	1239	1969	2591	1871	1092	1194	1028
LOC101796328	NC_040063.1	2597855	2602452	peak_18667	4598	+	-0.0230962259249	1.0	60.6109510086	NA|peak_14511	cds	rna-XM_027471111.1	119	170	185	136	93	104	536	583	523	453	314	409
DUSP6	NC_040046.1	154117904	154117995	peak_12283	92	-	-0.0230962259249	1.0	60.6109510086	peak_2308|peak_2434	utr5	rna-XM_027451766.1	384	684	548	327	264	262	777	995	799	522	358	392
PDGFA	NC_040060.1	6416184	6416245	peak_13312	62	+	-0.0230962259249	1.0	60.6109510086	NA|peak_13553	utr3	rna-XM_027468878.1	40	78	82	44	62	45	72	91	86	41	53	62
PCDH7	NC_040049.1	55356074	55356225	peak_20231	152	-	-0.0230180247139	1.0	60.6109510086	NA|peak_7024	cds	rna-XM_027457274.1	4	4	12	4	2	3	43	58	31	31	23	9
C1H12orf66	NC_040046.1	167730138	167730288	peak_12551	151	+	-1.02309622592	0.622022411019	249.822057759	peak_1044|peak_1129	cds	rna-XM_027456404.1	75	164	134	73	111	49	131	186	200	86	85	126
LEPR	NC_040053.1	6196859	6197010	peak_2174	152	-	-1.6081381899	0.371038958738	572.626096768	NA|peak_10227	utr3	rna-XM_027463096.1	21	21	52	13	29	23	27	42	56	7	20	21
LRRC28	NC_040056.1	3861004	3861335	peak_158	332	-	-0.0230180247139	1.0	60.6109510086	peak_11396|peak_11911	utr3	rna-XM_027465898.1	84	143	119	34	71	48	140	195	112	82	95	54
LOC101797692	NC_040065.1	11875092	11875182	peak_4936	91	-	0.976903774075	1.0	60.6109510086	peak_15241|NA	cds	rna-XM_027472138.1	53	134	105	66	57	26	39	57	39	42	24	26
TIAL1	NC_040051.1	5954371	5954701	peak_2945	331	+	-0.0230962259249	1.0	60.6109510086	peak_8192|peak_8585	utr3	rna-XM_027460709.1	148	280	238	129	143	160	251	398	394	193	249	263
FAM241A	NC_040049.1	3183645	3193855	peak_19420	10211	-	-0.0230962259249	1.0	60.6109510086	peak_6392|peak_6672	cds	rna-XM_027456395.1	271	633	488	272	362	229	401	403	493	248	252	372
9b5a9b49-1d58-4bef-b11b-bd16006eb2e5	NC_040058.1	12665239	12665571	peak_1409	333	-	-0.0230962259249	1.0	60.6109510086	peak_12268,peak_12267|peak_12829,peak_12828	NP_exon	9b5a9b49-1d58-4bef-b11b-bd16006eb2e5.trans	781	1118	958	575	480	385	1865	2551	2486	1230	1082	1323
PAPOLG	NC_040048.1	7892300	7897372	peak_14391	5073	+	-0.0230962259249	1.0	60.6109510086	peak_4381|peak_4588	utr3	rna-XM_027453276.1	102	174	235	120	147	109	155	187	206	115	94	132
ATR	NC_040054.1	24058127	24059383	peak_14186	1257	-	-0.0230962259249	1.0	60.6109510086	peak_10567|peak_11035	cds	rna-XM_027464294.1	74	138	96	57	80	56	110	163	130	108	100	75
SLC35G2	NC_040054.1	16695444	16695877	peak_14048	434	+	0.976903774075	1.0	60.6109510086	peak_10225|peak_10689	utr5	rna-XM_027464391.1	276	490	312	231	172	129	154	178	193	122	95	104
TMEM140	NC_040046.1	158969145	158969356	peak_12362	212	-	0.976981975286	1.0	60.6109510086	peak_2348|peak_2481	utr3	rna-XM_027452845.1	21	44	43	10	26	12	13	28	13	26	5	2
LOC113845394	NC_040062.1	817329	817917	peak_13024	589	-	-0.0230962259249	1.0	60.6109510086	peak_13813|peak_14448	NP_exon	rna-XR_003500957.1	165	255	182	134	82	113	323	399	343	219	143	198
TSHZ1	NC_040047.1	95869624	95869745	peak_9009	122	-	-0.0230962259249	1.0	60.6109510086	peak_4000|peak_4180	cds	rna-XM_021277655.2	21	47	47	20	29	10	35	36	37	21	18	14
ADRB1	NC_040051.1	8835488	8835996	peak_2989	509	-	-0.43821445487	0.724404069178	246.450021009	peak_8461|peak_8860	utr3	rna-XM_027460473.1	118	181	131	50	64	35	156	155	130	47	34	41
SAPCD2	NC_040063.1	194865	203429	peak_18561	8565	+	-0.0230962259249	1.0	60.6109510086	peak_13826|peak_14463	cds	rna-XM_027470852.1	394	783	510	373	469	336	1517	1691	1240	998	813	832
PLEKHG4	NC_040056.1	18236060	18238275	peak_590	2216	+	0.0230167670511	1.0	60.6109510086	peak_11225|NA	cds	rna-XM_027465929.1	194	297	267	191	239	148	429	426	405	373	197	378
CHD1	NC_040075.1	52082800	52087005	peak_18022	4206	-	-0.0230974879642	1.0	60.6109510086	peak_18238|peak_19069	cds	rna-XM_027447066.1	825	1770	1495	454	724	527	1404	1720	1595	865	506	632
AFF4	NC_040059.1	3300908	3301596	peak_16890	689	+	0.0230167670511	1.0	60.6109510086	peak_12440|NA	NP_exon	rna-XR_003500581.1	144	221	168	158	103	115	191	186	184	108	174	201
TAB1	NC_040046.1	149646095	149646156	peak_12189	62	+	-0.976981975286	1.0	60.6109510086	NA|peak_940	cds	rna-XM_005028302.4	100	169	85	54	71	39	126	109	100	52	83	76
OXSR1	NC_040047.1	4915020	4915319	peak_7947	300	+	-0.0230962259249	1.0	60.6109510086	peak_2720|peak_2847	utr3	rna-XM_027450369.1	583	901	725	422	585	449	580	664	551	417	374	363
MYOM1	NC_040047.1	104438394	104438545	peak_9103	152	-	-0.0230949640235	1.0	60.6109510086	peak_4049|peak_4236	utr5	rna-XM_027451992.1	450	894	720	576	704	492	271	335	282	258	296	251
NRP2	NC_040052.1	17319885	17320006	peak_5313	122	-	-0.0230167670511	1.0	60.6109510086	peak_9251|peak_9643	utr3	rna-XM_005016834.4	122	198	174	94	133	69	249	289	281	202	179	221
ATR	NC_040054.1	24064236	24064357	peak_14188	122	-	0.976903774075	1.0	60.6109510086	peak_10568|NA	cds	rna-XM_027464294.1	32	74	49	35	26	21	69	70	75	53	46	41
ACADL	NC_040052.1	11206434	11206495	peak_5163	62	-	0.0230167670511	1.0	60.6109510086	peak_9192|NA	utr3	rna-XM_027461394.1	353	554	430	311	217	267	144	319	176	218	133	152
ARL11	NC_040046.1	27609144	27609204	peak_10456	61	-	-0.0231744228972	1.0	60.6109510086	NA|peak_1541	utr3	rna-XM_021269343.2	18	29	12	21	26	16	26	24	42	14	10	34
KCNMA1	NC_040051.1	24021463	24021584	peak_3307	122	-	0.0230962259249	1.0	60.6109510086	peak_8607|NA	utr3	rna-XM_027460038.1	121	135	132	94	78	72	39	78	75	39	26	51
BNC2	NC_040075.1	32593475	32619928	peak_17805	26454	-	-0.0230962259249	1.0	60.6109510086	peak_18136|peak_18952	cds	rna-XM_027446565.1	181	308	322	94	171	128	444	563	688	302	228	271
GOPC	NC_040048.1	66843916	66844007	peak_15355	92	+	-0.0230949640235	1.0	60.6109510086	NA|peak_5078	cds	rna-XM_027454649.1	205	415	297	219	358	209	435	488	467	324	336	375
LOC101797738	NW_020866989.1	216543	216693	peak_4221	151	+	-0.0231756891752	1.0	60.6109510086	peak_18592|peak_19388	cds	rna-XM_027448924.1	21	38	31	20	20	9	29	44	36	20	13	12
STON2	NC_040050.1	25257661	25259116	peak_6854	1456	+	-0.0230962259249	1.0	60.6109510086	NA|peak_7488	utr3	rna-XM_027458947.1	310	477	489	288	251	188	733	772	710	479	327	397
NAP1L4	NC_040050.1	33249793	33251745	peak_7021	1953	-	-0.0230962259249	1.0	60.6109510086	peak_7896|peak_8251	cds	rna-XM_005019762.4	2142	4107	3426	1391	2064	1289	3269	4248	3546	2347	1727	1806
SKAP2	NC_040047.1	34798306	34799783	peak_8340	1478	-	-1.02309622592	0.622022411019	249.822057759	peak_3685|peak_3856	cds	rna-XM_021274204.2	177	355	226	170	248	84	300	520	452	202	290	238
HUNK	NC_040046.1	94852963	94853173	peak_11210	211	-	-0.0231756891752	1.0	60.6109510086	NA|peak_1912	utr3	rna-XM_027449202.1	47	118	54	23	40	47	149	204	231	76	74	92
TTC1	NC_040055.1	184934	199124	peak_16365	14191	-	-0.0230180247139	1.0	60.6109510086	peak_10752|peak_11228	cds	rna-XM_027465316.1	2427	4529	3766	1385	1925	1265	4623	5503	4644	2628	1937	2222
ZNF511	NC_040051.1	29447232	29447322	peak_3371	91	+	0.0230962259249	1.0	60.6109510086	peak_8380|NA	utr3	rna-XM_027460589.1	72	96	95	43	69	34	66	147	130	32	60	71
TRPS1	NC_040047.1	141265511	141268763	peak_9529	3253	-	-0.976981975286	1.0	60.6109510086	NA|peak_4418	cds	rna-XM_027452624.1	34	105	84	28	41	30	488	437	391	330	198	237
LOC101799748	NC_040050.1	40556960	40557681	peak_7366	722	+	-1.02309622592	0.622022411019	249.822057759	peak_7397|peak_7737	utr3	rna-XM_027457528.1	305	645	569	289	423	206	503	835	584	318	365	311
c8b7d95a-a5e4-4629-bd2b-0281a94d37d5	NC_040066.1	12386530	12386744	peak_6113	215	-	-0.0230167670511	1.0	60.6109510086	peak_15638,peak_15639|peak_16341,peak_16342	NP_exon	c8b7d95a-a5e4-4629-bd2b-0281a94d37d5.trans	400	785	566	432	366	339	376	536	440	304	323	346
55e87077-d39f-4b52-bcaa-a5a86914f996	NC_040054.1	9173338	9173542	peak_13783	205	-	0.976903774075	1.0	60.6109510086	peak_10367,peak_10366|peak_10830,peak_10829	NP_exon	55e87077-d39f-4b52-bcaa-a5a86914f996.trans	1100	1698	1656	861	795	825	1856	2071	1877	1249	1065	1105
LOC101792155	NC_040057.1	3124667	3124877	peak_19132	211	-	-0.0230962259249	1.0	60.6109510086	peak_11874|peak_12414	utr3	rna-XM_027466857.1	276	543	472	241	344	224	406	516	416	351	263	261
MTR	NC_040048.1	24950042	24950817	peak_14768	776	+	-1.02325388615	0.622002253928	736.904754352	NA|peak_4766	cds	rna-XM_027453767.1	62	97	67	50	67	81	61	86	41	34	37	7
ASXL2	NC_040048.1	117263625	117264164	peak_15966	540	+	-0.0230974879642	1.0	60.6109510086	peak_5099|peak_5343	utr3	rna-XM_027455506.1	1118	1687	1491	498	589	481	1120	1115	1293	454	405	395
IQCK	NC_040060.1	8610353	8611621	peak_13373	1269	-	-0.0230962259249	1.0	60.6109510086	peak_12988,peak_13251|peak_13575,peak_13857	utr5	rna-XM_027468821.1	1080	2281	2022	831	1216	703	2202	2505	1991	1506	1152	1031
FNBP4	NC_040050.1	34594444	34600652	peak_7080	6209	+	-0.0230962259249	1.0	60.6109510086	peak_7261|peak_7586	cds	rna-XM_027458061.1	8740	19410	17791	8281	10801	9345	15891	16055	16754	11265	8583	10754
AJM1	NC_040063.1	467062	467223	peak_18581	162	-	-1.6081381899	0.371038958738	572.626096768	NA|peak_14689,peak_14691	cds	rna-XM_021269033.2	12	15	15	6	10	10	27	26	19	11	2	11
31f8894b-e599-4a98-a695-ca3a1a9c1773	NC_040046.1	77929955	77934237	peak_10956	4283	+	-0.0230962259249	1.0	60.6109510086	peak_415,peak_416|peak_435,peak_437,peak_436	NP_exon	31f8894b-e599-4a98-a695-ca3a1a9c1773.trans	365	667	648	340	450	264	611	752	735	488	347	473
PLAGL2	NC_040066.1	15027466	15027677	peak_6229	212	-	-0.0230962259249	1.0	60.6109510086	peak_15698|peak_16403	cds	rna-XM_027472771.1	73	149	108	39	50	88	187	278	298	161	100	129
NBEA	NC_040046.1	23517341	23517462	peak_10385	122	+	-1.0231744229	0.622012413086	551.406443858	NA|peak_195	cds	rna-XM_027470271.1	12	47	28	22	42	18	23	54	26	19	16	17
ADIRF	NC_040051.1	28575687	28578181	peak_3354	2495	-	-0.0230949640235	1.0	60.6109510086	NA|peak_9033	cds	rna-XM_027460010.1	115	234	179	161	185	107	187	250	241	228	141	169
FAM181B	NC_040046.1	6009309	6009370	peak_10157	62	+	0.562022681457	1.0	60.6109510086	peak_99|NA	cds	rna-XM_027467026.1	30	27	40	2	10	16	40	50	25	31	12	14
LOC101805470	NC_040059.1	1156031	1156302	peak_16824	272	+	-1.78472796699	0.179758984442	447.561083208	NA|peak_12977	cds	rna-XM_027468399.1	2	0	12	0	0	2	169	174	176	89	56	87
ACVR2B	NC_040047.1	5759172	5759293	peak_7966	122	-	-1.02309622592	0.622022411019	249.822057759	peak_3531|peak_3691	utr3	rna-XM_027450384.1	73	153	106	69	67	73	109	168	82	64	57	52
USP54	NC_040051.1	21568814	21569025	peak_3260	212	-	-0.0230962259249	1.0	60.6109510086	peak_8590|peak_8993	cds	rna-XM_027460881.1	121	271	185	98	125	98	163	182	129	92	109	51
ITPRIPL2	NC_040060.1	8779248	8779488	peak_13383	241	+	-0.0230962259249	1.0	60.6109510086	peak_12993|peak_13580	utr3	rna-XM_021271599.2	659	1092	934	503	617	395	715	1052	890	624	438	443
CHRND	NC_040054.1	9557149	9557477	peak_13818	329	-	-0.0230962259249	1.0	60.6109510086	peak_10389|peak_10853	cds	rna-XM_027464203.1	3283	5964	5086	2993	3841	2756	2411	3520	2422	1821	1903	1798
MAATS1	NC_040046.1	119375473	119375594	peak_11495	122	+	1.19940768778	0.0429624515713	156.031976743	peak_617|NA	NP_exon	rna-XR_003494910.1	7	23	24	3	11	15	19	35	20	48	16	25
SWAP70	NC_040052.1	2642687	2649879	peak_5011	7193	+	-0.0230962259249	1.0	60.6109510086	peak_8708|peak_9107	cds	rna-XM_027461616.1	3613	7149	5625	2649	3385	2568	5485	6094	5136	3678	2595	2812
EXPH5	NC_040046.1	16363885	16364006	peak_10256	122	-	0.561944476007	1.0	60.6109510086	peak_1351|NA	cds	rna-XM_027468525.1	10	22	20	4	7	7	62	58	59	20	31	43
CHD1	NC_040075.1	52126536	52126717	peak_18025	182	-	0.561865012757	1.0	60.6109510086	peak_18243|peak_19072	utr5	rna-XM_027447066.1	28	80	35	19	17	14	40	36	57	30	11	16
3087f4e9-cb03-4fb9-8214-405430b9ee3e	NC_040047.1	24438005	24438365	peak_8237	361	-	-0.608059988685	0.685029977553	239.444841452	peak_3660,peak_3659|peak_3812,peak_3809	NP_exon	3087f4e9-cb03-4fb9-8214-405430b9ee3e.trans	101	87	89	53	27	30	98	114	96	41	34	36
EXTL3	NC_040048.1	116234794	116235670	peak_15912	877	-	0.976903774075	1.0	60.6109510086	peak_5851|peak_6094	utr5	rna-XM_027455435.1	1771	2771	2464	1354	1631	847	1725	1985	1874	1366	1208	1042
ARHGEF9	NC_040055.1	3780078	3780318	peak_16454	241	+	0.976981975286	1.0	60.6109510086	peak_10612|peak_11086	cds	rna-XM_021274526.2	51	78	94	32	31	40	33	50	46	24	19	32
SUGP2	NC_040065.1	4026852	4027303	peak_4477	452	-	-1.02309622592	0.622022411019	249.822057759	peak_15025|peak_15700	NP_exon	rna-XR_003501383.1	485	806	736	411	578	384	802	986	814	525	488	459
PINK1	NC_040067.1	2220058	2220148	peak_16106	91	+	-0.0230962259249	1.0	60.6109510086	NA|peak_16500	utr3	rna-XM_027443229.1	256	436	428	218	315	276	229	289	272	196	165	175
MICALL2	NC_040060.1	5752721	5758960	peak_13301	6240	+	-0.0230962259249	1.0	60.6109510086	peak_12953|peak_13543	utr3	rna-XM_005020087.3	375	729	690	312	408	215	477	679	553	251	295	306
MRPS11	NC_040056.1	7930068	7930898	peak_217	831	+	-0.0230962259249	1.0	60.6109510086	peak_11066|peak_11543	utr3	rna-XM_027466208.1	1615	2981	2219	1329	1829	987	2339	3900	2774	2204	1949	2062
LOC101800119	NC_040055.1	7164966	7165117	peak_16592	152	-	-0.0230962259249	1.0	60.6109510086	NA|peak_11325	utr3	rna-XM_027465277.1	118	235	110	143	164	65	224	258	305	177	112	210
MECOM	NC_040054.1	4371941	4380898	peak_13709	8958	-	-0.0230962259249	1.0	60.6109510086	peak_10338|peak_10800	cds	rna-XM_027464538.1	245	346	323	269	245	185	314	266	409	216	152	313
LOC113845619	NC_040065.1	1193434	1193641	peak_4302	208	-	-0.0230962259249	1.0	60.6109510086	peak_14949|peak_15622	cds	rna-XM_027472151.1	119	267	217	102	73	115	217	310	220	153	124	92
MOCS3	NC_040066.1	7789204	7789413	peak_6031	210	+	0.976903774075	1.0	60.6109510086	peak_15364|peak_16047	cds	rna-XM_027473051.1	152	318	201	144	102	92	277	343	357	203	195	210
TBC1D13	NC_040063.1	8202173	8202324	peak_18885	152	-	0.0230167670511	1.0	60.6109510086	peak_14185|NA	utr3	rna-XM_027470871.1	180	253	241	167	107	132	130	285	93	124	146	151
PTTG1	NC_040055.1	6310	6370	peak_16357	61	-	1.60810400159	0.0473666218566	170.56928216	peak_10751|NA	utr5	rna-XM_005009297.4	0	0	2	3	0	2	3	3	5	1	5	4
ZNF385D	NC_040047.1	38758312	38813822	peak_8418	55511	-	-0.0230167670511	1.0	60.6109510086	NA|peak_3910	cds	rna-XM_013105977.3	151	360	379	209	233	249	934	1115	844	919	731	713
SUSD6	NC_040050.1	40937230	40940310	peak_7379	3081	-	-1.02309622592	0.622022411019	249.822057759	peak_8022|peak_8397	cds	rna-XM_013101456.3	220	432	296	186	203	188	407	503	426	246	227	240
ADAM9	NC_040068.1	1907008	1907953	peak_1059	946	+	0.0230962259249	1.0	60.6109510086	peak_16110|NA	cds	rna-XM_005029470.3	222	415	261	192	220	158	320	347	230	296	177	149
HELZ	NC_040064.1	9258083	9274950	peak_2052	16868	+	-0.0230167670511	1.0	60.6109510086	peak_14408|peak_15068	cds	rna-XM_027471666.1	119	225	171	112	151	113	190	245	243	171	155	180
NID1	NC_040048.1	24634095	24634275	peak_14759	181	-	-0.0230962259249	1.0	60.6109510086	peak_5364|peak_5606	cds	rna-XM_027453765.1	1070	2480	1760	881	1372	701	1177	1889	1042	694	778	547
ADAM17	NC_040048.1	102335398	102335727	peak_15744	330	-	-0.0230962259249	1.0	60.6109510086	peak_5770|peak_6016	utr3	rna-XM_027455209.1	748	1849	1119	598	823	515	1507	1461	1628	848	786	848
LOC113841043	NW_020865532.1	10027	10088	peak_4191	62	+	-0.976903774075	1.0	60.6109510086	NA|peak_19238	cds	rna-XM_027447770.1	13	59	20	5	29	17	76	56	64	48	30	46
USP49	NC_040072.1	3590299	3590480	peak_9868	182	-	-0.976903774075	1.0	60.6109510086	NA|peak_17717	cds	rna-XM_027445143.1	142	187	132	125	95	41	117	147	136	65	88	114
CCNL2	NC_040067.1	4570718	4570869	peak_16224	152	+	-0.0230962259249	1.0	60.6109510086	peak_15835|peak_16541	utr3	rna-XM_027443261.1	144	212	199	138	139	117	185	248	210	133	109	142
NKRF	NC_040055.1	6992829	6993247	peak_16577	419	+	-0.0230962259249	1.0	60.6109510086	peak_10670|peak_11148	cds	rna-XM_027465251.1	145	350	220	122	244	119	326	431	389	236	214	258
TMEM165	NC_040049.1	48194573	48194901	peak_20133	329	-	0.976903774075	1.0	60.6109510086	peak_6712|peak_6977	utr3	rna-XM_027457076.1	224	419	276	149	190	166	461	535	496	365	282	225
AFF1	NC_040049.1	45205134	45205464	peak_20052	331	+	-0.0230962259249	1.0	60.6109510086	peak_6174|peak_6440	cds	rna-XM_027456242.1	507	916	725	492	516	374	558	711	631	364	389	408
LOC110351185	NC_040049.1	31631951	31635798	peak_19845	3848	-	-0.0230167670511	1.0	60.6109510086	NA|peak_6843	utr5	rna-XM_005020945.4	38	89	45	36	51	37	121	92	125	114	60	89
RHBDL3	NC_040064.1	1212615	1212706	peak_1786	92	+	-0.0230180247139	1.0	60.6109510086	NA|peak_14938	cds	rna-XM_027471643.1	3	19	11	6	6	2	13	22	10	15	7	3
TRPC3	NC_040049.1	43316305	43316725	peak_19993	421	+	-0.0231756891752	1.0	60.6109510086	NA|peak_6410	cds	rna-XM_021269501.2	16	38	42	7	28	16	180	169	195	94	71	73
BRINP1	NC_040063.1	4358767	4359156	peak_18695	390	-	-0.0230180247139	1.0	60.6109510086	peak_14087|peak_14735	cds	rna-XM_027470799.1	26	32	42	14	10	15	190	246	177	109	90	89
TNRC6B	NC_040046.1	150140886	150141726	peak_12207	841	+	-0.0230962259249	1.0	60.6109510086	peak_886|peak_959	cds	rna-XM_027451039.1	1383	2327	1978	1189	1303	949	2049	2305	1816	1630	1286	1387
ZNF281	NC_040053.1	30726709	30727189	peak_2737	481	-	-0.0231756891752	1.0	60.6109510086	peak_10013|peak_10462	cds	rna-XM_005027317.4	202	336	225	98	145	134	364	453	469	172	159	173
FAM76B	NC_040046.1	10877940	10881320	peak_10204	3381	-	-0.0230962259249	1.0	60.6109510086	peak_1319|peak_1402	cds	rna-XM_027467682.1	640	1166	1030	575	742	514	1125	1372	1288	856	687	747
PRRC2C	NC_040053.1	26890307	26890727	peak_2643	421	+	-0.0230962259249	1.0	60.6109510086	peak_9669|peak_10088	cds	rna-XM_027463606.1	2210	4173	3685	1652	2108	1502	4795	6284	5763	3533	2839	3333
PRRC2B	NC_040063.1	7240586	7241187	peak_18813	602	-	0.976903774075	1.0	60.6109510086	peak_14146|peak_14793	cds	rna-XM_027471077.1	5066	8339	7924	4023	4112	3654	8605	11108	9565	6177	5079	5845
KCNK2	NC_040048.1	22560604	22560815	peak_14732	212	+	-0.608139456313	0.685021649249	256.158615462	peak_4534|peak_4752	utr3	rna-XM_021269006.2	14	23	32	10	12	8	12	17	36	8	8	4
PAK2	NC_040054.1	15025750	15026410	peak_13985	661	+	-1.02309622592	0.622022411019	249.822057759	peak_10211|peak_10673	utr3	rna-XM_027464818.1	510	997	763	431	593	381	1014	1402	1207	647	547	613
LOC113841344	NW_020865821.1	60716	60893	peak_14203	178	+	1.02309622592	0.622022411019	249.822057759	peak_18438|NA	NP_exon	gene-LOC113841344.trans	4	20	13	9	7	10	5	36	19	2	17	15
ENKD1	NC_040056.1	19047081	19048248	peak_643	1168	-	-0.0230962259249	1.0	60.6109510086	peak_11635|peak_12150	cds	rna-XM_027465667.1	455	894	845	316	416	356	755	961	1102	505	390	528
ATG16L1	NC_040054.1	17032781	17033140	peak_14069	360	+	-0.0230962259249	1.0	60.6109510086	peak_10240|peak_10705	utr3	rna-XM_013108719.2	601	1156	892	464	531	389	850	1378	1201	524	555	683
PPP1R13B	NC_040050.1	14432257	14432498	peak_6654	242	+	-0.0230962259249	1.0	60.6109510086	peak_7076|peak_7390	cds	rna-XM_013108867.3	243	434	433	248	260	272	414	461	315	301	256	213
LOC101790681	NC_040054.1	9242417	9242537	peak_13798	121	-	-0.0230974879642	1.0	60.6109510086	peak_10379|peak_10840	utr5	rna-XM_027464216.1	209	197	121	64	105	45	238	224	282	144	69	106
GCN1	NC_040061.1	7531247	7532176	peak_20805	930	+	-0.0230962259249	1.0	60.6109510086	peak_13474|peak_14102	cds	rna-XM_027469902.1	364	813	534	408	555	349	709	896	887	636	621	528
LOC113841161	NW_020865638.1	3242	4081	peak_7759	840	+	0.976903774075	1.0	60.6109510086	peak_18425|peak_19251	cds	rna-XM_027447873.1	2899	5490	4250	2356	2537	1831	5377	6029	5983	3794	3007	3490
MTMR9	NC_040048.1	115031763	115031884	peak_15887	122	-	-0.0231744228972	1.0	60.6109510086	NA|peak_6083	utr3	rna-XM_005030596.4	74	149	89	136	87	79	156	189	154	100	113	141
MATR3	NC_040059.1	14560478	14560979	peak_17285	502	-	-0.0230949640235	1.0	60.6109510086	peak_12823|peak_13407	utr5	rna-XM_027468415.1	246	437	379	262	410	227	563	674	586	456	480	458
MIS18BP1	NC_040050.1	5625106	5625166	peak_6419	61	+	-0.0230962259249	1.0	60.6109510086	NA|peak_7242	cds	rna-XM_027458281.1	109	169	103	82	74	47	215	184	113	126	72	60
CDK5RAP2	NC_040063.1	4967334	4971826	peak_18703	4493	-	-0.0230962259249	1.0	60.6109510086	peak_14094|peak_14743	cds	rna-XM_021271206.2	233	540	348	151	236	153	604	706	784	403	350	392
BICD1	NC_040046.1	141022012	141022223	peak_11967	212	+	-0.0230962259249	1.0	60.6109510086	peak_775|peak_843	cds	rna-XM_027471489.1	44	116	108	43	57	31	65	73	109	30	38	50
FZD6	NC_040047.1	135632808	135633018	peak_9494	211	+	0.562022681457	1.0	60.6109510086	peak_3416|peak_3561	cds	rna-XM_027452565.1	327	371	444	137	106	114	255	227	172	155	99	105
ND2	NC_009684.1	5197	5525	peak_4199	329	+	0.0230962259249	1.0	60.6109510086	peak_2|NA	cds	gene-ND2.trans	73860	116467	113149	64291	66781	57773	110812	148227	102393	78484	77962	65912
COX3	NC_009684.1	10344	10432	peak_4204	89	+	-0.0230949640235	1.0	60.6109510086	NA|peak_8	cds	gene-COX3.trans	33043	52789	45658	38232	45262	33018	37282	49866	37880	36936	37115	34573
GARS	NC_040047.1	4336894	4338498	peak_7931	1605	-	-0.0230962259249	1.0	60.6109510086	peak_3512|peak_3671	utr3	rna-XM_027452875.1	2004	4052	3108	1460	1802	1341	4340	5685	4992	2726	2602	2652
CACNA1C	NC_040046.1	138943397	138985122	peak_11891	41726	-	0.0230949640235	1.0	60.6109510086	peak_2144|NA	cds	rna-XM_027463284.1	170	328	268	254	321	171	320	377	342	427	367	378
ADGRB1	NC_040047.1	154039272	154039333	peak_9643	62	+	-1.0231744229	0.622012413086	551.406443858	NA|peak_3610	utr3	rna-XM_027452768.1	8	22	19	15	12	19	24	39	30	14	19	15
LOC101799146	NC_040073.1	5446165	5446316	peak_3784	152	+	-0.0230962259249	1.0	60.6109510086	NA|peak_17926	utr3	rna-XM_027445464.1	2	29	19	14	6	10	476	546	498	461	328	301
JCAD	NC_040047.1	15731597	15736486	peak_8099	4890	-	-0.0230180247139	1.0	60.6109510086	peak_3595|peak_3749	cds	rna-XM_027450560.1	4056	8590	6282	2724	3694	2525	5704	6651	5989	3058	2652	2917
LOC101803951	NC_040048.1	111791076	111791954	peak_15836	879	-	1.0232551568	0.449416285894	618.684863687	peak_5819|NA	cds	rna-XM_021267767.2	4	8	6	2	4	4	12	13	12	0	8	2
DNAJC27	NC_040048.1	116718270	116718511	peak_15938	242	-	0.976981975286	1.0	60.6109510086	peak_5858|peak_6104	utr3	rna-XM_027455462.1	75	114	90	59	32	26	117	153	90	75	81	71
ROBO4	NC_040070.1	140542	140782	peak_18303	241	-	0.976983232949	1.0	60.6109510086	peak_16515|peak_17251	cds	rna-XM_027444228.1	176	375	389	149	151	160	103	172	219	138	67	164
LSM14A	NC_040057.1	12551213	12555356	peak_19249	4144	-	-0.0230962259249	1.0	60.6109510086	peak_11919|peak_12461	cds	rna-NM_001310414.2	4027	7665	6111	3361	4353	3100	6554	8178	6858	5697	4207	4670
SATB2	NC_040052.1	5125116	5125207	peak_5067	92	+	2.97745250381	0.0390934963515	147.00648272	peak_8735|NA	cds	rna-XM_027461509.1	7	11	4	1	1	1	41	33	48	43	27	38
CNBP	NC_040058.1	13562942	13563504	peak_1428	563	-	0.976903774075	1.0	60.6109510086	peak_12276|peak_12835	utr3	rna-XM_027467441.1	7403	12995	11610	5567	7588	4964	9120	12331	10852	6903	5687	6336
LMBR1	NC_040047.1	8771099	8785445	peak_8009	14347	-	-0.0230180247139	1.0	60.6109510086	peak_3557|peak_3714	cds	rna-XM_027450438.1	889	2008	1548	667	664	677	2141	2142	2247	1186	905	1056
CCT2	NC_040046.1	165715648	165715913	peak_12505	266	-	-0.0230167670511	1.0	60.6109510086	peak_2389|peak_2514	cds	rna-XM_027455864.1	1476	2530	2259	1385	1875	1173	2992	3861	2754	2874	2233	2187
PPP2R3A	NC_040054.1	16444707	16447289	peak_14038	2583	+	0.0230167670511	1.0	60.6109510086	peak_10222|NA	cds	rna-XM_027464015.1	630	1150	953	673	730	507	584	734	616	623	468	477
PRAG1	NC_040049.1	11987639	11987940	peak_19552	302	-	0.976903774075	1.0	60.6109510086	peak_6442|peak_6715	cds	rna-XM_027456393.1	77	228	182	94	102	74	390	362	302	277	116	236
14ddcbbc-358b-47d6-af32-298406bd816b	NC_040046.1	148370237	148370801	peak_12092	565	-	-0.0230962259249	1.0	60.6109510086	peak_2243,peak_2241|peak_2362,peak_2364	NP_exon	14ddcbbc-358b-47d6-af32-298406bd816b.trans	3222	3632	4261	2400	1860	1890	2273	3278	2958	1459	1439	1684
CEP135	NC_040049.1	47986792	47986883	peak_20126	92	-	0.0230167670511	1.0	60.6109510086	peak_6709|NA	cds	rna-XM_027457059.1	29	56	37	22	28	27	54	42	37	57	39	35
ARRDC4	NC_040056.1	4394630	4395048	peak_176	419	-	-0.0230974879642	1.0	60.6109510086	peak_11405|peak_11922	utr3	rna-XM_013091753.3	134	262	247	70	88	80	249	363	315	114	99	115
SNCAIP	NC_040075.1	60135498	60141306	peak_18093	5809	-	0.0230949640235	1.0	60.6109510086	peak_18278|NA	cds	rna-XM_027446362.1	87	162	151	125	158	105	380	424	363	389	277	349
TNFSF10	NC_040054.1	5464656	5465075	peak_13738	420	-	-0.0230974879642	1.0	60.6109510086	peak_10354|peak_10819	utr3	rna-XM_027464732.1	446	999	954	303	430	326	545	732	658	281	233	319
DCHS1	NC_040046.1	654236	654507	peak_10028	272	+	0.561944476007	1.0	60.6109510086	peak_26|peak_28	cds	rna-XM_027465903.1	76	280	177	49	72	78	275	250	278	125	92	160
ATXN1L	NC_040056.1	21712467	21713757	peak_800	1291	-	-0.0230962259249	1.0	60.6109510086	peak_11697|peak_12216	cds	rna-XM_027466679.1	2139	3814	2978	1509	1857	1328	4861	6052	5389	2881	2723	2853
KRAS	NC_040046.1	128077749	128078057	peak_11756	309	+	0.0230167670511	1.0	60.6109510086	peak_703|NA	utr3	rna-XM_027450007.1	284	532	403	233	375	244	555	607	505	498	342	432
LOC113843936	NC_040051.1	21876686	21877494	peak_3284	809	+	-0.0230167670511	1.0	60.6109510086	NA|peak_8736	cds	rna-XM_027459785.1	844	1448	1011	900	1034	661	1335	1881	1612	1236	1182	1255
TRPC1	NC_040054.1	24125410	24125650	peak_14190	241	+	-0.0230962259249	1.0	60.6109510086	peak_10282|peak_10745	utr3	rna-XM_027464106.1	226	503	434	151	257	178	388	519	418	292	201	249
BRPF3	NC_040072.1	4672042	4674411	peak_9924	2370	-	0.561944476007	1.0	60.6109510086	peak_16997|peak_17747	cds	rna-XM_027444712.1	175	412	374	101	154	100	413	312	469	194	115	245
CD276	NC_040056.1	12353664	12353844	peak_365	181	+	-0.0230962259249	1.0	60.6109510086	peak_11131|peak_11612	utr3	rna-XM_027466272.1	295	619	497	298	299	270	720	821	742	640	378	500
ZNF148	NC_040052.1	27610195	27611715	peak_5579	1521	+	0.976903774075	1.0	60.6109510086	peak_9034|peak_9419	cds	rna-XM_027461042.1	204	350	272	176	170	96	278	390	329	215	206	287
RBM25	NC_040050.1	39362693	39362873	peak_7329	181	-	-0.0230962259249	1.0	60.6109510086	peak_8001|peak_8377	cds	rna-XM_027457943.1	736	1431	1272	798	869	773	1451	2051	1562	1244	1105	1156
80c2ec91-c919-4f71-b4e0-07988f4aac73	NC_040048.1	51434350	51434549	peak_15160	200	+	0.976981975286	1.0	60.6109510086	peak_4725,peak_4723|peak_4968,peak_4970	NP_exon	80c2ec91-c919-4f71-b4e0-07988f4aac73.trans	66	144	159	57	78	32	194	308	183	164	154	151
CLCN7	NC_040060.1	11360398	11366301	peak_13452	5904	-	-0.0230962259249	1.0	60.6109510086	peak_13281|peak_13889	cds	rna-XM_027469033.1	266	445	412	240	284	220	563	596	699	399	373	338
LOC101802169	NC_040052.1	32000513	32000692	peak_5650	180	+	-0.0230962259249	1.0	60.6109510086	peak_9065|peak_9455	NP_exon	rna-XR_002401103.2	171	319	329	145	186	169	158	216	181	128	108	101
RPGR	NC_040046.1	83484391	83486602	peak_11069	2212	+	0.976983232949	1.0	60.6109510086	peak_455|NA	cds	rna-XM_027454484.1	55	45	48	20	32	27	22	33	46	23	30	31
SHC1	NC_040071.1	81007	81278	peak_837	272	-	-1.02309622592	0.622022411019	249.822057759	peak_16700|peak_17453	utr5	rna-XM_027444506.1	124	241	216	123	118	107	138	264	179	133	87	99
RASSF7	NC_040050.1	49985388	49985959	peak_7498	572	+	-1.02309622592	0.622022411019	249.822057759	peak_7460|peak_7804	cds	rna-XM_021270577.2	217	412	414	230	212	223	935	958	1141	596	384	630
NCOA1	NC_040048.1	116694398	116695771	peak_15933	1374	+	-1.02309622592	0.622022411019	249.822057759	peak_5083,peak_5084|peak_5325,peak_5326	cds	rna-XM_027455451.1	745	1397	1007	655	710	549	1218	1830	1248	732	851	712
CAAP1	NC_040075.1	66028491	66038401	peak_18165	9911	+	-0.0230962259249	1.0	60.6109510086	peak_17873|peak_18678	cds	rna-XM_027446471.1	627	1011	864	486	596	400	1162	1387	1195	873	700	707
KMT2C	NC_040047.1	6674104	6674615	peak_7982	512	-	-0.0230962259249	1.0	60.6109510086	peak_3543|peak_3699	cds	rna-XM_027450414.1	1217	2161	1823	1047	1229	948	1679	2378	1930	1126	1193	1155
ZDHHC8	NC_040061.1	4058143	4062225	peak_20639	4083	-	-1.02309622592	0.622022411019	249.822057759	peak_13576,peak_13577,peak_13578,peak_13579|peak_14224	utr3	rna-XM_027469644.1	699	1782	1054	515	996	509	1843	2379	2038	1050	1114	1133
LOC113845146	NC_040059.1	13491887	13492097	peak_17219	211	+	-1.02309622592	0.622022411019	249.822057759	NA|peak_13161	NP_exon	gene-LOC113845146.trans	9	77	61	29	37	31	17	62	33	11	26	21
USP31	NC_040060.1	738513	738694	peak_13061	182	-	-0.0230962259249	1.0	60.6109510086	peak_13105|peak_13701	cds	rna-XM_027468908.1	62	146	116	55	61	41	86	146	133	47	76	87
LOC101795574	NC_040063.1	879735	879825	peak_18589	91	+	0.976983232949	1.0	60.6109510086	peak_13836|NA	utr3	rna-XM_027470990.1	37	63	37	29	35	8	54	60	50	42	38	44
NPM2	NC_040068.1	513239	514316	peak_1005	1078	-	-0.0230180247139	1.0	60.6109510086	peak_16140|peak_16847	utr3	rna-XM_027443478.1	521	792	568	368	291	181	1332	1597	937	773	669	394
CREBBP	NC_040060.1	11588378	11592806	peak_13475	4429	-	-0.0230180247139	1.0	60.6109510086	peak_13299|peak_13910	cds	rna-XM_027468853.1	2630	4944	4529	1841	2237	1616	4849	5327	4233	3031	1914	1892
LOC113845360	NC_040061.1	10932791	10933061	peak_20922	271	+	0.561943218207	1.0	60.6109510086	peak_13512|peak_14147	cds	rna-XM_027470225.1	394	610	859	248	136	189	656	575	618	340	208	267
LOC101797138	NC_040048.1	93735681	93739580	peak_15686	3900	+	0.976903774075	1.0	60.6109510086	peak_4987|peak_5227	cds	rna-XM_005009200.4	288	677	657	245	367	310	2253	2547	2468	1553	1252	1543
REV3L	NC_040048.1	69716653	69716744	peak_15380	92	+	0.0230167670511	1.0	60.6109510086	peak_4846|NA	cds	rna-XM_027454696.1	19	42	29	17	23	13	18	47	28	47	30	29
LOC101796197	NC_040050.1	34039770	34040128	peak_7043	359	-	-0.0230962259249	1.0	60.6109510086	NA|peak_8261	utr3	rna-XM_021278020.2	34	31	28	28	21	19	39	72	44	37	30	25
HIPK1	NC_040072.1	367537	367628	peak_9711	92	-	0.0230167670511	1.0	60.6109510086	peak_16917|NA	cds	rna-XM_027445131.1	81	151	131	64	85	84	186	183	190	160	120	123
STK32B	NC_040049.1	63431682	63440721	peak_20315	9040	+	-0.97706143416	1.0	60.6109510086	NA|peak_6558	cds	rna-XM_027457400.1	6	2	2	4	0	0	14	16	58	33	21	32
SLC25A48	NC_040059.1	5373117	5373328	peak_16960	212	+	-1.02317568918	0.622012251195	633.83074332	NA|peak_13052	utr3	rna-XM_027468564.1	42	183	129	37	86	82	38	48	44	19	18	20
ACTB	NC_040060.1	3898654	3898922	peak_13230	269	+	-0.0230962259249	1.0	60.6109510086	peak_12912|peak_13506	utr3	rna-NM_001310421.1	18691	36144	29347	15851	20723	15355	47129	64222	54627	31434	34275	33603
ST6GALNAC3	NC_040053.1	16142421	16142662	peak_2399	242	+	-0.0230962259249	1.0	60.6109510086	peak_9553|peak_9957	utr3	rna-XM_005010319.4	73	94	91	25	75	41	154	233	205	116	86	136
PNO1	NC_040048.1	12959697	12960017	peak_14472	321	-	0.976903774075	1.0	60.6109510086	peak_5227|peak_5481	cds	rna-XM_027453386.1	946	2154	1371	1166	451	857	2546	3346	3406	2551	1011	2049
METTL23	NC_040064.1	3028685	3028745	peak_1833	61	-	-0.0230167670511	1.0	60.6109510086	NA|peak_15142	utr3	rna-XM_027471433.1	41	142	58	50	108	22	84	96	67	93	44	78
SNAI1	NC_040066.1	288738	288949	peak_5783	212	-	-0.0230962259249	1.0	60.6109510086	peak_15505|peak_16189	utr3	rna-XM_027472944.1	187	340	309	145	227	132	237	359	377	143	190	254
TRAF2	NC_040063.1	417242	418383	peak_18577	1142	-	-0.0230180247139	1.0	60.6109510086	peak_14048|peak_14686	utr3	rna-XM_027471047.1	1722	3156	2667	1116	1260	995	1989	2163	2046	955	983	958
UTP25	NC_040048.1	400540	400661	peak_14211	122	+	-0.0230962259249	1.0	60.6109510086	NA|peak_4520	cds	rna-XM_027452992.1	41	83	68	65	51	30	95	141	112	84	54	80
LOC101792676	NC_040073.1	3341187	3341715	peak_3619	529	+	-0.0230962259249	1.0	60.6109510086	NA|peak_17840	cds	rna-XM_013109172.3	28	80	58	30	56	42	1204	1297	1100	811	702	847
GUCY1A1	NC_040049.1	30778721	30780276	peak_19828	1556	-	-1.02309622592	0.622022411019	249.822057759	peak_6564|peak_6838	cds	rna-XM_027456606.1	170	269	237	145	203	128	234	346	214	167	150	119
OBSCN	NC_040047.1	2525406	2526281	peak_7883	876	+	-0.0230167670511	1.0	60.6109510086	NA|peak_2813	cds	rna-XM_027450316.1	391	522	559	430	382	295	136	165	104	102	87	102
UBE2Q1	NC_040071.1	6886	10116	peak_825	3231	-	-0.0230962259249	1.0	60.6109510086	peak_16690|peak_17442	cds	rna-XM_027444452.1	3544	6858	5944	2770	3715	2588	6316	7768	6224	4153	3555	3734
457b5501-a2d0-4f5b-b21b-0e4579cf3905	NC_040047.1	25286506	25286598	peak_8247	93	+	0.0230167670511	1.0	60.6109510086	peak_2861,peak_2858|NA	NP_exon	457b5501-a2d0-4f5b-b21b-0e4579cf3905.trans	110	74	88	104	36	26	184	59	64	157	56	96
LSP1	NC_040050.1	32193532	32220742	peak_7001	27211	+	-0.0230180247139	1.0	60.6109510086	peak_7224|peak_7549	cds	rna-XM_005019743.4	33161	67366	58609	21366	27209	21085	48210	58731	56935	27438	21728	25611
LOC101797616	NC_040057.1	21210038	21210518	peak_19384	481	-	-0.0230192825141	1.0	60.6109510086	peak_11976|peak_12527	utr3	rna-XM_005025722.4	92	120	88	22	48	28	35	50	62	13	20	20
TRRAP	NC_040060.1	7148744	7148835	peak_13318	92	-	0.976903774075	1.0	60.6109510086	peak_13218|peak_13831	utr3	rna-XM_027469274.1	66	137	135	79	54	39	136	150	148	137	65	90
PDLIM5	NC_040049.1	8999913	9000004	peak_19515	92	-	-0.0230167670511	1.0	60.6109510086	NA|peak_6701	cds	rna-XM_027455589.1	308	441	401	306	358	245	177	162	147	179	95	118
PRPF4B	NC_040047.1	79827879	79828119	peak_8878	241	+	-0.0230962259249	1.0	60.6109510086	NA|peak_3259	cds	rna-XM_027451712.1	418	879	670	495	646	393	795	790	696	583	448	519
GID8	NC_040066.1	13069861	13074333	peak_6140	4473	+	-0.0230962259249	1.0	60.6109510086	peak_15417|peak_16098	cds	rna-XM_005025782.4	753	1324	1111	510	699	490	1159	1379	1463	762	673	826
TCOF1	NC_040059.1	7677052	7679514	peak_17034	2463	+	-0.0230962259249	1.0	60.6109510086	peak_12513,peak_12514|peak_13077	cds	rna-XM_027468169.1	1249	2415	1802	1179	1439	913	2508	3515	3394	1862	1911	2007
SMARCA2	NC_040075.1	26775462	26782270	peak_17741	6809	+	-0.0230962259249	1.0	60.6109510086	peak_17664|peak_18460	utr3	rna-XM_027446706.1	2891	5210	4858	1990	2812	1707	5248	6160	5240	4209	2582	2779
ZNF654	NC_040046.1	111094356	111094507	peak_11354	152	-	-0.0231756891752	1.0	60.6109510086	NA|peak_1974	cds	rna-XM_013097794.3	32	98	58	33	35	30	62	83	82	29	27	44
CDKN2C	NC_040053.1	11091660	11091899	peak_2284	240	-	-0.0231756891752	1.0	60.6109510086	peak_9839|peak_10275	utr5	rna-XM_021277394.2	170	170	130	110	57	75	67	87	56	30	36	17
MAVS	NC_040049.1	73476682	73476862	peak_20492	181	-	-1.02309622592	0.622022411019	249.822057759	NA|peak_7163	utr3	rna-XM_027455821.1	137	121	163	113	105	89	169	235	213	101	97	120
YTHDF1	NC_040066.1	13392327	13399116	peak_6142	6790	-	-0.0230962259249	1.0	60.6109510086	peak_15652,peak_15653|peak_16358	utr3	rna-XM_027473026.1	2764	5414	4405	1980	2585	1852	5976	7314	6525	3086	3008	3136
LOC101802647	NC_040055.1	10806673	10807153	peak_16637	481	-	0.561944476007	1.0	60.6109510086	peak_10873|peak_11347	utr3	rna-XM_027465159.1	134	257	160	59	79	48	36	56	24	18	21	16
NKD1	NC_040057.1	17572800	17572861	peak_19330	62	+	-7.06423628939	4.01695776543e-39	2.84483073832e-34	NA|peak_12353	cds	rna-XM_013101430.2	0	237	1	2	0	0	0	344	285	210	218	0
LRRC42	NC_040053.1	9720526	9721730	peak_2237	1205	-	-0.0230962259249	1.0	60.6109510086	peak_9813,peak_9814|peak_10255	utr3	rna-XM_027462578.1	701	1238	1226	607	700	541	1105	1780	1418	813	910	853
LRRC8D	NC_040053.1	20813619	20814157	peak_2464	539	+	-0.0231756891752	1.0	60.6109510086	peak_9583|peak_9991	cds	rna-XM_005029274.4	33	75	53	29	26	22	152	153	128	71	54	59
ADO	NC_040053.1	2513365	2513693	peak_2120	329	+	-0.0230962259249	1.0	60.6109510086	peak_9419|peak_9824	utr3	rna-XM_027463797.1	503	759	711	389	379	413	641	864	695	462	496	442
SAMD11	NC_040067.1	5564469	5564530	peak_16265	62	-	-0.97706143416	1.0	60.6109510086	NA|peak_16724	cds	rna-XM_027443360.1	10	5	45	9	8	7	39	71	51	37	69	28
LOC101800907	NC_040046.1	29197980	29200962	peak_10492	2983	+	0.0230962259249	1.0	60.6109510086	peak_225|NA	NP_exon	rna-XR_003501308.1	199	376	219	181	226	104	173	407	332	243	220	185
GPR162	NC_040046.1	121797599	121797659	peak_11604	61	+	0.976981975286	1.0	60.6109510086	peak_645|NA	cds	rna-XM_027449785.1	105	244	211	83	103	61	230	260	238	173	185	139
LOC101790071	NC_040046.1	201434645	201436401	peak_12904	1757	+	-1.0231744229	0.622012413086	551.406443858	NA|peak_1274	utr3	rna-XM_027461372.1	3	101	93	73	39	65	479	850	662	371	343	393
CCDC102B	NC_040047.1	98821757	98882411	peak_9036	60655	-	0.976903774075	1.0	60.6109510086	peak_4015|peak_4199	utr3	rna-XM_021274771.2	111	240	229	108	103	104	214	252	261	167	140	165
MAP1LC3A	NC_040066.1	146164	146375	peak_5777	212	+	-0.0230962259249	1.0	60.6109510086	peak_15260|peak_15939	utr3	rna-XM_027473118.1	375	525	450	353	351	180	360	396	340	281	192	233
FBXO40	NC_040046.1	121465858	121466039	peak_11572	182	+	0.97706143416	1.0	60.6109510086	peak_637|peak_692	utr3	rna-XM_027449728.1	52	116	102	26	76	25	18	19	35	24	43	6
BRD3OS	NC_040063.1	6130204	6130678	peak_18760	475	-	-0.0231756891752	1.0	60.6109510086	peak_14131|peak_14778	cds	rna-XM_027470585.1	300	484	437	203	211	172	388	411	449	210	102	195
RBM43	NC_040050.1	2507956	2508166	peak_6348	211	-	-1.0231744229	0.622012413086	551.406443858	peak_7603|peak_7950	cds	rna-XM_005010074.4	68	116	144	98	88	83	34	92	63	66	12	29
PHLPP2	NC_040056.1	21789927	21789987	peak_806	61	+	-1.0231744229	0.622012413086	551.406443858	NA|peak_11831	cds	rna-XM_027466395.1	33	73	40	53	44	30	58	69	99	49	30	43
SYNE2	NC_040050.1	11542420	11542480	peak_6585	61	+	-0.0230962259249	1.0	60.6109510086	peak_7026|peak_7341	cds	rna-XM_027459199.1	30	47	46	35	47	16	42	42	42	37	25	23
EVI5	NC_040053.1	35764466	35764765	peak_2844	300	+	0.976981975286	1.0	60.6109510086	peak_9748|peak_10183	utr3	rna-XM_027462557.1	158	183	200	57	86	79	254	200	230	151	99	187
HIPK3	NC_040050.1	62832350	62832830	peak_7737	481	+	-0.0230962259249	1.0	60.6109510086	peak_7576|peak_7919	cds	rna-XM_013101982.3	3106	4934	3838	2371	2548	1699	1798	2115	1749	860	950	948
OLFM1	NC_040063.1	5557069	5557549	peak_18741	481	-	-0.0230962259249	1.0	60.6109510086	peak_14118|peak_14766	utr3	rna-XM_027470816.1	235	574	285	197	264	130	1080	1108	1243	610	497	560
MAP6D1	NC_040054.1	13844572	13844752	peak_13911	181	+	-0.608138189896	0.685021782428	249.71257932	peak_10181|peak_10642	utr3	rna-XM_027464307.1	24	27	48	10	15	22	43	67	84	14	15	34
UBE2Q2	NC_040056.1	13761779	13764309	peak_448	2531	-	-0.0230949640235	1.0	60.6109510086	peak_11549|peak_12065	cds	rna-XM_027466619.1	941	1651	1467	1074	1344	955	1759	2163	1785	1826	1612	1818
RLIM	NC_040055.1	4458475	4458715	peak_16472	241	-	-0.0230962259249	1.0	60.6109510086	peak_10796|peak_11273	cds	rna-XM_005009005.4	713	1337	1199	563	762	561	1402	2009	1679	1090	964	1169
TMCO4	NC_040067.1	2073945	2074216	peak_16094	272	-	-0.0230974879642	1.0	60.6109510086	peak_15929|peak_16626	NP_exon	rna-XR_003492246.1	78	152	135	49	59	62	123	401	101	86	114	55
AGGF1	NC_040075.1	23737173	23740750	peak_17678	3578	-	0.976903774075	1.0	60.6109510086	peak_18085|peak_18893	cds	rna-XM_027446338.1	910	1384	1396	670	819	572	1284	1664	1436	1005	772	769
BCL7A	NC_040061.1	12400855	12412055	peak_21004	11201	+	-0.0230962259249	1.0	60.6109510086	peak_13552|peak_14191	cds	rna-XM_027469824.1	1631	3133	2120	1440	1983	1198	2313	2506	2721	1694	1640	1794
EBF3	NC_040051.1	1599812	1599963	peak_2884	152	+	-1.02309622592	0.622022411019	249.822057759	NA|peak_8559	utr3	rna-XM_027460123.1	20	31	49	29	18	14	67	76	105	36	30	56
ARNTL2	NC_040046.1	129095440	129095680	peak_11776	241	+	-0.0230962259249	1.0	60.6109510086	peak_712|peak_780	utr5	rna-XM_005026295.4	228	287	296	192	156	170	264	291	286	253	152	130
ASXL1	NC_040066.1	15065624	15065834	peak_6239	211	+	-1.02309622592	0.622022411019	249.822057759	peak_15464|peak_16146	cds	rna-XM_027472727.1	91	239	167	80	192	124	175	201	292	83	162	119
USP8	NC_040056.1	10532941	10535459	peak_305	2519	+	-0.0230180247139	1.0	60.6109510086	peak_11099|peak_11579	cds	rna-XM_027466332.1	5156	10383	8158	2957	4371	2420	8728	9984	8837	5451	3253	3792
C1D	NC_040048.1	12985830	12989227	peak_14475	3398	+	-0.0230962259249	1.0	60.6109510086	peak_4422|peak_4632	cds	rna-XM_027453389.1	456	857	732	325	459	314	812	1063	897	607	431	440
TMEM150C	NC_040049.1	44526739	44527100	peak_20030	362	-	-1.02309622592	0.622022411019	249.822057759	peak_6671|peak_6936	utr3	rna-XM_027456924.1	224	324	283	145	240	115	311	381	361	170	188	218
CRYM	NC_040060.1	8117797	8117947	peak_13357	151	+	-1.02317568918	0.622012251195	633.83074332	NA|peak_13564	utr5	rna-XM_027469564.1	12	29	24	25	13	5	22	55	33	15	16	16
VPS13B	NC_040047.1	134491941	134492091	peak_9467	151	+	-0.0230962259249	1.0	60.6109510086	NA|peak_3549	cds	rna-XM_027452515.1	52	149	111	49	80	55	127	200	163	113	94	105
HHATL	NC_040047.1	2756835	2757253	peak_7905	419	+	-0.0230962259249	1.0	60.6109510086	peak_2701,peak_2702|peak_2831	utr3	rna-XM_027450320.1	747	1378	1451	829	1114	899	263	379	341	182	258	248
NOP14	NC_040049.1	66983763	66986337	peak_20385	2575	+	-0.0230962259249	1.0	60.6109510086	peak_6308|peak_6585	utr3	rna-XM_005016180.2	903	1544	1298	723	805	510	1749	2312	1901	1069	945	1005
RABL6	NC_040063.1	487715	487895	peak_18583	181	-	-0.0230962259249	1.0	60.6109510086	peak_14052|peak_14693	cds	rna-XM_013095019.3	488	828	706	397	547	404	949	1326	1087	650	667	679
POLR3G	NC_040075.1	74009070	74010240	peak_18238	1171	+	-0.0230180247139	1.0	60.6109510086	peak_17909|peak_18719	cds	rna-XM_027446104.1	119	141	152	66	72	51	216	195	121	176	54	76
ECHDC1	NC_040048.1	62466908	62467206	peak_15320	299	+	-0.0230180247139	1.0	60.6109510086	peak_4817|peak_5065	utr3	rna-XM_027454577.1	143	272	259	81	134	84	193	266	181	96	133	79
SH3BGRL	NC_040055.1	19406649	19406949	peak_16803	301	-	-1.02309622592	0.622022411019	249.822057759	peak_10962|peak_11444	cds	rna-XM_027464976.1	705	1516	774	476	814	545	1516	2083	1319	990	940	773
CCDC80	NC_040046.1	116144822	116146109	peak_11433	1288	-	-0.0230962259249	1.0	60.6109510086	peak_1917|peak_2024,peak_2025	cds	rna-XM_005025839.4	7748	16435	14643	5310	7706	6101	22376	22926	26069	13980	9550	13240
PHF21A	NC_040050.1	36606776	36614048	peak_7189	7273	+	-0.0230962259249	1.0	60.6109510086	peak_7320|peak_7653	cds	rna-XM_027459645.1	754	1306	1227	558	672	539	1548	1874	1400	928	855	814
CDKN2AIP	NC_040049.1	20755613	20755674	peak_19735	62	-	0.976903774075	1.0	60.6109510086	peak_6512|peak_6782	utr5	rna-XM_027456303.1	127	165	135	112	31	74	184	262	215	165	104	147
LOC110353396	NC_040073.1	6914925	6915285	peak_3877	361	-	-0.0230180247139	1.0	60.6109510086	peak_17373|peak_18146	utr3	rna-XM_021274960.2	110	297	194	59	131	90	213	264	281	154	111	114
XRCC5	NC_040052.1	37359795	37359885	peak_5761	91	-	-0.0230962259249	1.0	60.6109510086	NA|peak_9802	cds	rna-XM_027461675.1	69	157	117	89	120	64	187	242	204	168	131	134
PAK6	NC_040050.1	35034532	35034743	peak_7103	212	+	-0.0231756891752	1.0	60.6109510086	NA|peak_7600	cds	rna-XM_005019175.4	4	11	20	7	1	10	111	131	82	64	35	37
ZNF423	NC_040057.1	17025908	17026118	peak_19316	211	-	-0.0230962259249	1.0	60.6109510086	peak_11955|peak_12506	cds	rna-XM_027467195.1	646	1302	1092	531	815	569	1058	1576	1359	806	722	883
ITPRID2	NC_040052.1	18931843	18932084	peak_5354	242	-	-0.0230962259249	1.0	60.6109510086	NA|peak_9664	cds	rna-XM_027461105.1	49	70	91	42	42	33	70	126	87	64	34	39
DARS2	NC_040053.1	26020616	26020825	peak_2610	210	-	-0.0230962259249	1.0	60.6109510086	peak_9966|peak_10403	utr3	rna-XM_027463314.1	140	206	205	92	142	103	207	237	185	165	132	127
NEFH	NC_040061.1	9639976	9640096	peak_20879	121	-	-1.0231744229	0.622012413086	551.406443858	NA|peak_14344	cds	rna-XM_027470206.1	38	29	49	34	43	54	30	112	62	86	17	11
SMPD1	NC_040046.1	535326	535657	peak_10021	332	+	0.714023267644	0.726602698564	245.624761191	peak_22|peak_23	cds	rna-XM_027465735.1	353	482	338	80	99	58	254	230	318	94	44	107
PPP6R2	NC_040046.1	202184562	202184742	peak_12949	181	-	0.976903774075	1.0	60.6109510086	peak_2602|peak_2740	utr3	rna-XM_021267003.2	317	456	397	212	209	208	297	424	280	208	177	214
LOC101794805	NC_040046.1	68720404	68722264	peak_10856	1861	+	-0.0230167670511	1.0	60.6109510086	peak_364|peak_377	utr3	rna-XM_027447006.1	612	1168	1019	633	799	612	836	1257	980	788	743	768
STIM2	NC_040049.1	57057846	57058026	peak_20236	181	-	-0.0230192825141	1.0	60.6109510086	peak_6762|peak_7028	utr3	rna-XM_027457286.1	27	56	57	15	17	9	34	71	60	17	18	27
PTPN12	NC_040046.1	190361148	190392935	peak_12797	31788	+	-0.0230180247139	1.0	60.6109510086	peak_1149|peak_1224	cds	rna-XM_027459634.1	492	848	740	326	302	253	806	921	751	479	294	408
NTN4	NC_040046.1	156578671	156578942	peak_12326	272	-	-0.0230974879642	1.0	60.6109510086	peak_2338|peak_2468	utr3	rna-XM_027452291.1	112	352	204	94	118	74	160	308	167	79	99	69
UBA3	NC_040058.1	5285120	5288248	peak_1306	3129	+	-0.0230962259249	1.0	60.6109510086	peak_12022|peak_12568	cds	rna-XM_027467827.1	1309	2796	2096	1003	1329	775	1767	2479	2048	1367	1020	1046
KDM4B	NC_040065.1	2697909	2700421	peak_4386	2513	+	-0.0230962259249	1.0	60.6109510086	peak_14637|peak_15316	utr3	rna-XM_027471890.1	1082	2100	1715	742	965	674	1532	1928	1707	949	776	832
TTN	NC_040052.1	20182054	20182295	peak_5408	242	+	-1.02309622592	0.622022411019	249.822057759	peak_8931|peak_9318	cds	rna-XM_027461598.1	716	1217	997	542	700	478	212	316	238	140	118	158
FIP1L1	NC_040049.1	48836426	48841485	peak_20143	5060	-	-0.0230180247139	1.0	60.6109510086	peak_6720|peak_6984	cds	rna-XM_027457086.1	4223	7532	7169	2615	3351	2662	8727	10614	7549	5108	3712	3667
MYF6	NC_040046.1	161100130	161100308	peak_12449	179	-	0.0230167670511	1.0	60.6109510086	peak_2373|NA	NP_exon	rna-XR_003492168.1	124	168	155	144	87	62	145	200	121	128	118	109
STX11	NC_040048.1	48287737	48287828	peak_15092	92	+	-3.22503771647	1.00374636671e-09	2.46066399174e-05	NA|peak_4916	utr3	rna-XM_027454293.1	0	0	14	22	7	2	5	25	22	0	4	9
LOC101796539	NC_040064.1	646527	646677	peak_1762	151	+	-0.0231744228972	1.0	60.6109510086	NA|peak_14920	utr3	rna-XM_027471618.1	14	29	17	23	16	20	29	38	29	23	7	36
RBBP5	NC_040072.1	4198889	4202668	peak_9896	3780	-	-0.0230949640235	1.0	60.6109510086	peak_16975|peak_17728	utr3	rna-XM_027444846.1	472	779	555	489	693	398	699	659	707	598	490	570
LOC101800286	NC_040059.1	12679992	12680053	peak_17195	62	-	-0.0230962259249	1.0	60.6109510086	peak_12797|peak_13378	cds	rna-XM_027468699.1	197	389	373	177	246	189	371	517	366	318	262	259
CLDN5	NC_040061.1	4947640	4947790	peak_20664	151	+	-0.0231744228972	1.0	60.6109510086	NA|peak_14039	utr3	rna-XM_027469976.1	147	229	245	144	194	197	138	194	178	66	129	110
ELF2	NC_040049.1	36920777	36921645	peak_19927	869	+	-0.0230974879642	1.0	60.6109510086	peak_6128|peak_6386	utr3	rna-XM_027456746.1	2221	4262	3153	1211	1610	1038	3428	4155	4163	1606	1334	1609
FSTL1	NC_040046.1	119600148	119602716	peak_11505	2569	-	-0.0230962259249	1.0	60.6109510086	peak_1956|peak_2061	utr3	rna-XM_027449655.1	12166	18752	17945	9787	11344	10018	23922	28612	27904	17506	13994	18209
ROR1	NC_040053.1	6614252	6614641	peak_2184	390	-	-0.0230962259249	1.0	60.6109510086	peak_9792,peak_9793|peak_10233	utr3	rna-XM_005022883.4	67	171	117	43	71	58	288	366	325	170	148	186
HOXA2	NC_040047.1	34960594	34960924	peak_8342	331	-	-0.0230962259249	1.0	60.6109510086	peak_3686|peak_3858	cds	rna-XM_027450968.1	46	89	71	45	43	17	243	284	334	137	150	185
ASXL2	NC_040048.1	117261711	117262250	peak_15964	540	+	0.976903774075	1.0	60.6109510086	peak_5097|peak_5341	cds	rna-XM_027455506.1	1276	2379	1753	941	1246	842	1508	1552	1408	965	813	907
BOD1L1	NC_040049.1	61709342	61709583	peak_20292	242	+	-0.0230962259249	1.0	60.6109510086	peak_6271|peak_6545	cds	rna-XM_027457375.1	632	1452	1195	512	907	518	1100	1358	1231	969	726	780
ERG	NC_040046.1	91933616	91936531	peak_11151	2916	+	0.561865012757	1.0	60.6109510086	peak_494|peak_519	utr3	rna-XM_027449116.1	1542	2508	2813	782	883	813	3739	4261	4339	1797	1309	1841
CLMP	NC_040070.1	5053875	5057246	peak_18443	3372	-	-0.0230167670511	1.0	60.6109510086	peak_16564,peak_16565|peak_17314	cds	rna-XM_021277005.2	216	492	395	227	367	248	1254	1439	1506	1270	1019	1143
MIB2	NC_040067.1	4385707	4386142	peak_16206	436	-	-0.0230949640235	1.0	60.6109510086	NA|peak_16696	utr5	rna-XM_027443308.1	67	236	168	164	213	66	226	265	232	230	261	184
LOC101801085	NC_040067.1	3773168	3775510	peak_16169	2343	-	-0.0230962259249	1.0	60.6109510086	peak_15976|peak_16672	cds	rna-XM_027443207.1	1057	1907	1696	953	1163	863	2499	3603	3201	2136	1896	2185
ceecd01e-e400-43a1-8921-8831586302cc	NC_040048.1	66229294	66230136	peak_15349	843	+	-0.0230962259249	1.0	60.6109510086	peak_4828,peak_4825,peak_4829,peak_4826|peak_5074,peak_5073	NP_exon	ceecd01e-e400-43a1-8921-8831586302cc.trans	275	615	484	156	289	263	759	729	746	403	266	362
GGNBP2	NC_040065.1	7487244	7488755	peak_4671	1512	-	-0.0230962259249	1.0	60.6109510086	peak_15110|peak_15788	cds	rna-XM_027471747.1	550	998	763	473	601	314	772	1136	933	713	523	584
MCC	NC_040075.1	57369609	57378365	peak_18065	8757	-	-0.0230962259249	1.0	60.6109510086	peak_18263|peak_19089	cds	rna-XM_027446642.1	385	962	691	369	536	361	861	1323	1170	737	622	818
ESRRB	NC_040050.1	27631720	27631810	peak_6894	91	-	-0.608056329151	0.545661496906	679.953710043	NA|peak_8181	utr3	rna-XM_013094211.3	2	7	3	17	1	13	17	19	15	33	44	19
ACTB	NC_040060.1	3899217	3899425	peak_13231	209	+	-0.0230962259249	1.0	60.6109510086	peak_12913,peak_12914|peak_13507,peak_13508	utr3	rna-NM_001310421.1	9923	18447	16313	7896	10497	8196	24333	34804	27654	17837	17088	16866
SFT2D3	NC_040054.1	17255628	17255898	peak_14081	271	+	-0.0230962259249	1.0	60.6109510086	peak_10247|peak_10709	cds	rna-XM_027464493.1	194	404	345	182	118	168	430	706	485	242	304	249
S1PR4	NC_040065.1	5220453	5220720	peak_4579	268	+	-0.0230180247139	1.0	60.6109510086	peak_14743|peak_15418	cds	rna-XM_005019523.4	107	162	124	59	62	62	204	400	312	150	163	179
TBC1D15	NC_040046.1	164741708	164744681	peak_12490	2974	-	-0.0230962259249	1.0	60.6109510086	peak_2381|peak_2506	cds	rna-XM_027455518.1	338	659	485	301	395	249	577	637	590	501	340	401
SH3RF3	NC_040046.1	61844961	61845142	peak_10729	182	-	-0.0230167670511	1.0	60.6109510086	peak_1571|peak_1672	utr3	rna-XM_027444954.1	110	241	224	85	206	98	251	356	267	250	261	206
SGPL1	NC_040051.1	32488076	32488286	peak_3423	211	+	0.0230962259249	1.0	60.6109510086	peak_8411|NA	utr3	rna-XM_013107605.3	171	324	294	168	200	179	284	351	276	214	193	240
BCL11B	NC_040050.1	17342747	17343316	peak_6735	570	+	0.976980717486	0.687534862081	234.909806279	peak_7097|peak_7420	utr3	rna-XM_013100713.2	14	20	30	8	7	2	2119	2313	1197	937	792	595
NOLC1	NC_040051.1	20881949	20887119	peak_3238	5171	-	-0.0230962259249	1.0	60.6109510086	peak_8576,peak_8577|peak_8982,peak_8983	utr3	rna-XM_027460315.1	6717	11677	9777	5277	5821	4290	17704	23531	19820	11796	10029	10983
GSC2	NC_040061.1	5846463	5846644	peak_20700	182	-	-1.60821638687	0.371025736657	644.376431641	NA|peak_14249	cds	rna-XM_027470256.1	11	34	26	26	31	23	55	46	63	26	9	24
SH3BP2	NC_040049.1	67088796	67091097	peak_20392	2302	-	-1.02309622592	0.622022411019	249.822057759	peak_6825|peak_7107	cds	rna-XM_005016165.4	202	519	332	187	279	184	440	719	495	259	329	287
KTN1	NC_040050.1	8404313	8411015	peak_6514	6703	+	-0.0230962259249	1.0	60.6109510086	peak_6985|peak_7295,peak_7296	cds	rna-XM_027457881.1	1584	2724	2476	1455	1986	1201	2118	2465	2177	1896	1412	1416
LOC101795488	NC_040053.1	12713095	12713246	peak_2296	152	+	0.976981975286	1.0	60.6109510086	peak_9505|NA	cds	rna-XM_027462667.1	21	37	39	22	10	13	112	63	80	97	19	40
SLC49A3	NC_040075.1	50739009	50739249	peak_18005	241	-	-1.0231744229	0.622012413086	551.406443858	NA|peak_19059	utr3	rna-XM_027446541.1	24	45	51	49	32	27	46	54	55	27	19	34
RHBDL3	NC_040064.1	1213215	1213456	peak_1787	242	+	1.56210214033	0.625027232164	248.678422516	peak_14274|NA	utr3	rna-XM_027471643.1	9	24	21	9	7	0	26	33	20	31	7	21
SRSF5	NC_040050.1	40922007	40922097	peak_7377	91	-	-0.0230962259249	1.0	60.6109510086	NA|peak_8395	utr5	rna-XM_027458352.1	977	1970	1109	833	949	699	1449	1701	1580	854	1060	977
EP300	NC_040046.1	150511346	150511647	peak_12239	302	+	-0.0230962259249	1.0	60.6109510086	peak_907|peak_979	utr3	rna-XM_027451194.1	450	759	635	331	296	330	610	707	520	361	278	260
AARS	NC_040056.1	18349424	18349664	peak_598	241	-	-0.0230962259249	1.0	60.6109510086	peak_11607|peak_12122	utr3	rna-XM_027466380.1	228	693	712	209	323	304	844	659	710	543	332	389
PTN	NC_040046.1	142509682	142509952	peak_11980	271	-	-0.0230962259249	1.0	60.6109510086	peak_2193|peak_2318	utr3	rna-XM_027445011.1	599	1014	965	583	683	446	10132	8987	11768	8486	4692	7153
LOC101795967	NC_040059.1	5165338	5167376	peak_16956	2039	-	-0.0230962259249	1.0	60.6109510086	peak_12691|peak_13267	cds	rna-XM_027468109.1	821	1646	1277	806	969	645	2090	2157	2153	1786	1032	1411
MIOS	NC_040047.1	26509305	26510249	peak_8270	945	+	0.0230949640235	1.0	60.6109510086	peak_2876|NA	cds	rna-XM_027450844.1	48	80	80	60	69	40	89	134	132	81	91	99
WDR76	NC_040056.1	529556	532273	peak_57	2718	+	-0.0230962259249	1.0	60.6109510086	peak_10989|peak_11469	cds	rna-XM_027466352.1	482	836	696	468	432	313	742	789	826	552	443	508
KCNB1	NC_040066.1	558938	559148	peak_5793	211	+	-1.6081381899	0.371038958738	572.626096768	NA|peak_15950	cds	rna-XM_027472936.1	0	17	8	1	6	10	24	23	16	3	12	7
INCENP	NC_040050.1	57828086	57839155	peak_7649	11070	-	-0.0230180247139	1.0	60.6109510086	peak_8122|peak_8507	cds	rna-XM_027458543.1	8666	18534	13416	5400	7843	4913	22525	29420	24195	14220	10355	10617
BAZ1B	NC_040074.1	4284181	4284271	peak_1183	91	-	0.0230167670511	1.0	60.6109510086	peak_17476|NA	cds	rna-XM_027445983.1	639	1077	902	578	797	530	1213	1583	1160	1125	926	1022
PLIN1	NC_040056.1	8298003	8298063	peak_241	61	-	0.97706143416	1.0	60.6109510086	peak_11444,peak_11445|NA	utr3	rna-NM_001310391.1	20	2	28	5	4	11	2	12	7	0	13	9
ALG2	NC_040047.1	94172631	94172957	peak_8978	327	+	-0.0231756891752	1.0	60.6109510086	peak_3166|peak_3297	cds	rna-XM_005027721.4	75	188	153	55	105	38	172	259	208	64	80	108
BMP3	NC_040049.1	45657536	45657837	peak_20073	302	-	-0.0230962259249	1.0	60.6109510086	peak_6687|peak_6946	cds	rna-XM_027456981.1	145	381	245	96	192	85	383	535	347	240	209	190
SKIL	NC_040054.1	4882135	4882226	peak_13724	92	+	0.0230167670511	1.0	60.6109510086	peak_10106|NA	cds	rna-XM_027464258.1	77	140	104	68	62	79	120	138	130	155	87	123
LOC101792808	NC_040046.1	81789367	81809946	peak_11046	20580	+	-0.0230962259249	1.0	60.6109510086	NA|peak_474	cds	rna-XM_027448994.1	60	163	95	42	69	57	140	164	163	89	78	87
QRFP	NC_040063.1	7426199	7426290	peak_18832	92	+	1.02317568918	0.622012251195	633.83074332	peak_13949|NA	utr3	rna-XM_027471159.1	35	103	6	26	38	19	43	19	46	20	22	3
HIP1	NC_040074.1	4196163	4197023	peak_1175	861	+	-0.0230167670511	1.0	60.6109510086	peak_17429|peak_18211,peak_18212	utr3	rna-XM_027445902.1	356	708	589	382	398	288	596	654	590	483	399	455
CEP63	NC_040054.1	16078045	16078783	peak_14017	739	-	-0.0230962259249	1.0	60.6109510086	NA|peak_10942	cds	rna-XM_005019381.4	184	479	358	178	284	245	352	503	327	261	265	265
DCHS1	NC_040046.1	666494	666855	peak_10031	362	+	-0.0230962259249	1.0	60.6109510086	peak_30|peak_31	cds	rna-XM_027465903.1	131	328	255	146	189	139	362	433	406	207	237	260
223dc473-d5a3-41da-a40b-b2bb5f794801	NC_040075.1	8226087	8226935	peak_17445	849	-	-0.0230180247139	1.0	60.6109510086	peak_17961,peak_17960|peak_18778,peak_18777	NP_exon	223dc473-d5a3-41da-a40b-b2bb5f794801.trans	1180	2183	2069	803	734	742	1912	2566	1838	1083	939	870
COL8A2	NC_040069.1	1364564	1364744	peak_3993	181	-	-0.0230962259249	1.0	60.6109510086	peak_16325|peak_17061	cds	rna-XM_027443796.1	100	62	98	48	54	30	398	301	393	237	152	214
CDO1	NC_040075.1	62794890	62795098	peak_18115	209	+	-0.0230167670511	1.0	60.6109510086	peak_17844|peak_18652	cds	rna-XM_027446576.1	239	413	314	220	236	187	1006	1022	1302	974	678	919
UTP11	NC_040069.1	2247398	2247597	peak_4030	200	+	-0.0230962259249	1.0	60.6109510086	NA|peak_16937	cds	rna-XM_027443758.1	208	507	500	183	318	306	555	561	516	405	327	342
XKR5	NC_040048.1	114666061	114666331	peak_15882	271	-	-0.0230180247139	1.0	60.6109510086	peak_5840|peak_6079	cds	rna-XM_027455376.1	143	441	244	122	145	66	297	565	421	154	256	206
PRKAB1	NC_040061.1	7737722	7738864	peak_20819	1143	-	-1.02309622592	0.622022411019	249.822057759	peak_13662|peak_14304	cds	rna-XM_027469918.1	815	1270	1112	655	717	498	1121	1160	1516	698	595	866
AFF2	NC_040055.1	8639080	8639231	peak_16617	152	-	1.3693406346	0.0242429440942	100.013482995	peak_10863|NA	utr3	rna-XM_027465060.1	48	103	57	24	62	26	15	47	33	39	58	34
ICE2	NC_040056.1	15515565	15516433	peak_483	869	+	0.976903774075	1.0	60.6109510086	peak_11176|peak_11667	cds	rna-XM_027466150.1	86	173	193	86	103	57	153	134	201	104	96	128
SEMA3A	NC_040046.1	194066823	194067191	peak_12822	369	-	-0.0230962259249	1.0	60.6109510086	NA|peak_2686	cds	rna-XM_027460075.1	438	717	554	419	405	333	752	781	786	469	476	519
EIF4G1	NC_040054.1	9175311	9176078	peak_13785	768	-	-0.0230180247139	1.0	60.6109510086	peak_10369|peak_10832	cds	rna-XM_027464231.1	6134	10800	9586	4174	4427	3720	10835	12513	12139	6466	5472	6210
INO80D	NC_040052.1	17281910	17282151	peak_5310	242	+	-0.0230962259249	1.0	60.6109510086	peak_8860|peak_9258	cds	rna-XM_027462289.1	136	252	227	121	177	124	180	238	181	143	132	142
SHTN1	NC_040051.1	7302427	7316212	peak_2969	13786	+	0.562022681457	1.0	60.6109510086	peak_8206|peak_8599	cds	rna-XM_027460307.1	52	148	101	19	55	26	218	246	213	138	119	94
COL4A6	NC_040055.1	6331359	6332925	peak_16527	1567	+	-0.0230962259249	1.0	60.6109510086	peak_10644|peak_11117	utr3	rna-XM_027465434.1	4896	8051	6693	3604	3421	3197	2651	3261	2499	1646	1500	1421
ZBTB14	NC_040047.1	105135608	105136681	peak_9111	1074	-	-0.0230180247139	1.0	60.6109510086	peak_4050|peak_4238	cds	rna-XM_027452009.1	667	1299	1042	402	570	377	1139	1264	1126	584	491	527
9b9e3189-7f38-4ab6-b028-a3e64e508584	NC_040050.1	34561810	34562584	peak_7076	775	-	0.561943218207	1.0	60.6109510086	peak_7915,peak_7916|peak_8274,peak_8275	NP_exon	9b9e3189-7f38-4ab6-b028-a3e64e508584.trans	1232	2339	1778	714	552	507	2282	2205	1988	1213	884	728
LOC101799516	NC_040062.1	581136	581375	peak_13012	240	+	-2.34534220008	0.122032974966	360.101659995	peak_13782|peak_14426	utr3	rna-XM_005028672.4	201	558	21	174	387	16	110	285	65	8	18	63
FAT3	NC_040046.1	9672203	9672414	peak_10177	212	+	0.976903774075	1.0	60.6109510086	peak_104|NA	cds	rna-XM_027467294.1	74	186	123	42	105	60	160	371	305	158	179	223
ZC3H14	NC_040050.1	22424628	22424779	peak_6833	152	-	0.976903774075	1.0	60.6109510086	peak_7802|peak_8160	cds	rna-XM_027457859.1	372	732	573	355	340	254	521	494	425	358	237	258
LOC106015465	NC_040075.1	3700765	3700915	peak_17434	151	-	-0.0231744228972	1.0	60.6109510086	NA|peak_18772	cds	rna-XM_027446630.1	112	231	166	124	217	122	219	287	239	157	163	193
GNB1	NC_040067.1	8187217	8187397	peak_16347	181	+	-0.0230962259249	1.0	60.6109510086	peak_15891|peak_16592	utr3	rna-XM_027443286.1	1125	1986	1588	1057	1343	990	2072	2644	2127	1688	1566	1565
AES	NC_040065.1	5171978	5172591	peak_4576	614	-	-0.0230167670511	1.0	60.6109510086	peak_15072|peak_15746	utr5	rna-XM_027472586.1	1133	2049	1353	1224	1482	722	1527	2031	1825	1214	1434	1276
ZNF687	NC_040071.1	856261	856352	peak_906	92	+	-0.0230167670511	1.0	60.6109510086	NA|peak_17411	cds	rna-XM_027444657.1	102	150	169	92	115	130	162	224	208	128	172	148
PWWP2A	NC_040055.1	151970	152151	peak_16364	182	+	1.29898702206	0.453186008648	588.297058499	peak_10575|peak_11048	utr3	rna-XM_027465307.1	33	179	141	23	31	22	128	152	74	88	25	38
ESS2	NC_040061.1	5835717	5836707	peak_20698	991	-	-0.0230962259249	1.0	60.6109510086	peak_13608|peak_14247	utr3	rna-XM_021273490.2	508	670	554	344	300	192	659	739	711	300	323	365
RPUSD4	NC_040070.1	68286	68406	peak_18294	121	+	-0.0230962259249	1.0	60.6109510086	NA|peak_17160	utr3	rna-XM_027444284.1	126	270	241	134	184	112	282	300	339	169	176	210
05b1980c-b37d-4b27-8e29-c96ec2a547ec	NC_040066.1	13010634	13011378	peak_6136	745	-	-0.0230180247139	1.0	60.6109510086	peak_15646,peak_15648|peak_16354,peak_16352	NP_exon	05b1980c-b37d-4b27-8e29-c96ec2a547ec.trans	420	722	522	212	309	189	495	594	627	282	216	324
REL	NC_040048.1	7924865	7924926	peak_14393	62	+	-0.0230167670511	1.0	60.6109510086	NA|peak_4590	utr3	rna-XM_027453277.1	29	83	76	37	65	29	73	90	81	54	55	68
DSCC1	NC_040047.1	142951602	142951782	peak_9550	181	-	-0.0230962259249	1.0	60.6109510086	peak_4229|peak_4431	utr3	rna-XM_027450244.1	107	153	139	52	60	78	256	397	243	182	140	105
CHD9	NC_040057.1	18941555	18942674	peak_19344	1120	+	-0.0230962259249	1.0	60.6109510086	peak_11833|peak_12365	cds	rna-XM_027467012.1	151	277	184	136	185	107	245	250	263	176	137	203
LYSMD4	NC_040056.1	3718983	3719194	peak_152	212	+	-1.02309622592	0.622022411019	249.822057759	peak_11039|peak_11519	NP_exon	rna-XR_003499738.1	89	107	118	88	71	51	84	147	120	52	62	64
SEBOX	NC_040065.1	10528255	10528944	peak_4861	690	+	-0.0230962259249	1.0	60.6109510086	peak_14874,peak_15210|peak_15888,peak_15549	utr3	rna-XM_027471999.1	286	653	424	223	350	213	566	713	503	380	368	310
NCAPD3	NC_040070.1	3113205	3114229	peak_18374	1025	-	-0.0230167670511	1.0	60.6109510086	peak_16546|peak_17286	cds	rna-XM_027444146.1	163	255	255	133	193	125	318	429	349	338	227	247
MPDZ	NC_040075.1	31518544	31519691	peak_17786	1148	+	-1.02309622592	0.622022411019	249.822057759	peak_17700,peak_17703|peak_18493,peak_18496	utr3	rna-XM_027446716.1	387	604	510	291	347	221	459	643	518	321	354	262
ARHGAP21	NC_040047.1	17853334	17855717	peak_8139	2384	+	0.0230167670511	1.0	60.6109510086	peak_2803|NA	cds	rna-XM_027450627.1	377	583	544	347	431	311	501	585	369	501	329	337
RBPJL	NC_040066.1	2165765	2165886	peak_5852	122	+	5.94463907483	7.76246107673e-68	7.06810628095e-63	peak_15288|NA	cds	rna-XM_027473343.1	18	27	21	0	0	3	10	6	2	27	7	17
SYNE2	NC_040050.1	11561390	11564542	peak_6588	3153	+	-0.0230962259249	1.0	60.6109510086	peak_7029|peak_7344	cds	rna-XM_027459199.1	413	765	523	268	453	206	528	674	611	315	314	346
UBE2H	NC_040046.1	201861878	201862059	peak_12932	182	+	0.0230167670511	1.0	60.6109510086	peak_1210|NA	utr3	rna-XM_027461640.1	446	625	673	378	423	344	578	611	463	471	415	367
PLEKHA7	NC_040052.1	250670	251101	peak_4973	432	+	-1.02309622592	0.622022411019	249.822057759	NA|peak_9090	cds	rna-XM_027461413.1	57	162	137	62	96	66	181	256	194	120	130	113
CNST	NC_040048.1	28886242	28886482	peak_14808	241	+	-1.02309622592	0.622022411019	249.822057759	peak_4563|peak_4783	cds	rna-XM_027453864.1	77	130	126	52	65	76	153	127	132	88	49	64
7075ec76-9530-4f11-9cda-cb00960dad09	NC_040049.1	75133951	75134398	peak_20540	448	+	-0.0230192825141	1.0	60.6109510086	peak_6358,peak_6360|peak_6645,peak_6643	NP_exon	7075ec76-9530-4f11-9cda-cb00960dad09.trans	175	343	235	91	79	77	1475	1160	1016	597	290	364
KIF24	NC_040075.1	8405187	8405308	peak_17455	122	-	-1.02309622592	0.622022411019	249.822057759	NA|peak_18784	cds	rna-XM_027447189.1	239	294	255	192	251	194	103	180	130	101	62	63
CORO2B	NC_040056.1	1353152	1353213	peak_90	62	-	-1.02309622592	0.622022411019	249.822057759	NA|peak_11879	utr3	rna-XM_027466203.1	137	284	207	119	163	129	199	306	250	136	150	133
CCNT2	NC_040052.1	33257914	33258273	peak_5677	360	-	-0.0230962259249	1.0	60.6109510086	peak_9364|peak_9772	utr3	rna-XM_021272946.2	171	338	242	118	202	127	215	299	287	140	169	157
UCHL5	NC_040053.1	28294615	28298307	peak_2707	3693	-	-0.0230962259249	1.0	60.6109510086	peak_10000|peak_10445	cds	rna-XM_027463263.1	871	1374	1376	731	991	687	1890	2502	2365	1769	1416	1656
LOC101801269	NC_040070.1	139716	139776	peak_18301	61	+	0.0230167670511	1.0	60.6109510086	peak_16408|NA	utr3	rna-XM_027444237.1	28	106	97	43	69	61	146	63	18	97	28	95
HEATR6	NC_040065.1	6905131	6905791	peak_4652	661	+	-0.0231756891752	1.0	60.6109510086	peak_14784|peak_15457	utr3	rna-XM_027471981.1	394	613	607	242	358	223	785	861	777	407	321	330
AFAP1L2	NC_040051.1	8712806	8713301	peak_2984	496	+	0.0230962259249	1.0	60.6109510086	peak_8213|NA	cds	rna-XM_027460095.1	227	412	315	234	278	197	250	317	170	227	155	145
TRMT10A	NC_040049.1	7224594	7228447	peak_19507	3854	+	-0.0230962259249	1.0	60.6109510086	peak_5944|peak_6205	cds	rna-XM_027456204.1	960	1708	1461	790	1204	877	1287	1825	1282	1001	878	900
ZNF652	NC_040073.1	5280286	5281031	peak_3769	746	-	-0.0230962259249	1.0	60.6109510086	peak_17333|peak_18107	utr3	rna-XM_005026139.4	1827	3441	2706	1302	1620	1154	3060	3969	3545	1816	1708	1816
CTTNBP2NL	NC_040072.1	1921561	1921771	peak_9782	211	+	-0.0230962259249	1.0	60.6109510086	peak_16803|peak_17545	utr3	rna-XM_027444758.1	72	68	75	25	63	30	67	85	98	38	39	39
PLEKHA7	NC_040052.1	251798	252400	peak_4974	603	+	-0.0231744228972	1.0	60.6109510086	NA|peak_9091	cds	rna-XM_027461413.1	29	109	101	59	99	58	140	181	140	102	110	80
UNC45B	NC_040065.1	11861964	11862335	peak_4933	372	+	-0.0230167670511	1.0	60.6109510086	peak_14917|peak_15590	cds	rna-XM_027472137.1	1703	3474	2573	1662	2349	1510	1075	1528	947	1091	960	917
NFKBIZ	NC_040046.1	114517729	114517789	peak_11388	61	-	-0.976903774075	1.0	60.6109510086	NA|peak_1993	cds	rna-XM_027449527.1	17	26	31	13	12	17	44	65	55	37	34	29
ACP2	NC_040050.1	57814026	57814087	peak_7647	62	+	0.0230962259249	1.0	60.6109510086	peak_7537|NA	utr3	rna-XM_027458832.1	86	117	181	89	109	98	261	220	146	148	126	92
PRPF38B	NC_040053.1	31048344	31048464	peak_2766	121	-	0.976983232949	1.0	60.6109510086	peak_10025|NA	utr3	rna-XM_013107741.2	68	133	127	54	56	70	109	137	102	92	96	95
KCND2	NC_040046.1	178202648	178202709	peak_12658	62	+	-1.02317695559	0.449428476863	606.262142275	NA|peak_1176	cds	rna-XM_027457814.1	10	15	4	5	3	4	21	42	17	11	5	7
G3BP2	NC_040049.1	46470934	46474675	peak_20091	3742	-	-0.0230962259249	1.0	60.6109510086	peak_6698|peak_6961	cds	rna-XM_013093239.3	1560	2455	2207	1378	1844	1195	2331	2905	2404	2013	1593	1626
CACNG1	NC_040064.1	9359413	9359532	peak_2056	120	-	0.0230962259249	1.0	60.6109510086	peak_14557|NA	utr5	rna-XM_005016095.4	694	1209	864	568	654	532	209	269	147	155	145	105
NUDCD1	NC_040047.1	138364090	138370149	peak_9511	6060	-	-0.0230962259249	1.0	60.6109510086	NA|peak_4406	cds	rna-XM_027452610.1	279	493	386	288	405	209	470	504	508	326	355	351
USP32	NC_040065.1	7578026	7578267	peak_4681	242	-	0.976981975286	1.0	60.6109510086	peak_15116|peak_15794	utr3	rna-XM_027471761.1	105	145	140	40	75	63	131	157	112	83	88	69
TNRC18	NC_040060.1	3987486	3991351	peak_13241	3866	+	-0.0230962259249	1.0	60.6109510086	peak_12922|peak_13515	cds	rna-XM_027469078.1	8554	15517	14373	6525	8402	6361	13978	17274	14553	9010	7864	8228
COL2A1	NC_040073.1	6172587	6173727	peak_3843	1141	+	0.175089607275	0.82249154057	276.135672295	peak_17206|NA	cds	rna-XM_027445847.1	1333	2475	2068	2186	2541	2110	32150	26229	25187	40221	24776	28204
DCP1A	NC_040058.1	11377314	11380102	peak_1381	2789	+	0.976903774075	1.0	60.6109510086	peak_12062|peak_12615	cds	rna-XM_027467506.1	224	437	368	140	229	180	435	586	470	313	341	321
CDKN1C	NC_040050.1	33141194	33141458	peak_7018	265	-	0.976981975286	1.0	60.6109510086	peak_7893|peak_8247	cds	rna-XM_027458597.1	153	247	221	82	100	101	524	448	608	382	229	394
IL13RA1	NC_040055.1	12849369	12849580	peak_16724	212	+	-0.0230962259249	1.0	60.6109510086	NA|peak_11194	utr3	rna-XM_027464870.1	7	47	32	16	17	10	70	95	69	44	31	43
FLT4	NC_040059.1	7424201	7428818	peak_17019	4618	-	0.0230167670511	1.0	60.6109510086	peak_12724|NA	cds	rna-XM_027468569.1	196	241	268	154	141	145	246	361	378	213	211	287
CACTIN	NC_040065.1	1265916	1269460	peak_4309	3545	-	-0.0230962259249	1.0	60.6109510086	peak_14953|peak_15627	cds	rna-XM_027472296.1	8042	15442	12216	6103	7128	5480	13885	19483	16395	9591	9116	9897
LOC101793288	NC_040048.1	14536437	14562894	peak_14498	26458	-	-0.0230949640235	1.0	60.6109510086	peak_4430,peak_5242|peak_5492	utr5	rna-XM_027453422.1	766	1294	1082	863	1151	729	853	1014	841	1011	719	967
GASK1B	NC_040049.1	29739407	29740338	peak_19819	932	+	-0.0230180247139	1.0	60.6109510086	peak_6082,peak_6083|peak_6335	cds	rna-XM_005016555.4	2813	5693	3942	1800	2374	1492	3127	4480	2929	1606	1705	1555
CCDC191	NC_040046.1	116590030	116595426	peak_11447	5397	-	-0.0230974879642	1.0	60.6109510086	peak_1922,peak_1923|peak_2030	cds	rna-XM_027449603.1	835	1608	1345	468	638	396	1755	2470	2088	938	763	878
MCM3AP	NC_040052.1	15679598	15680309	peak_5241	712	-	-0.0230962259249	1.0	60.6109510086	peak_9231,peak_9230|peak_9622,peak_9621	utr3	rna-XM_027460992.1	281	487	681	250	313	275	493	631	550	404	359	344
ANKRD50	NC_040049.1	42260428	42261028	peak_19976	601	+	-0.0230962259249	1.0	60.6109510086	peak_6145|peak_6405	cds	rna-XM_005015559.4	1296	2275	1880	1074	1457	923	1867	2292	1493	1177	1181	1063
LOC113843136	NC_040048.1	80327770	80328039	peak_15512	270	-	-0.0230180247139	1.0	60.6109510086	peak_5648|peak_5905	cds	rna-XM_027453788.1	953	2502	1529	716	674	621	514	545	531	242	228	253
RHOU	NC_040048.1	41730213	41730334	peak_15027	122	+	0.0230167670511	1.0	60.6109510086	peak_4663|NA	utr3	rna-XM_027454164.1	276	453	410	237	295	269	574	684	624	455	542	495
CDH2	NC_040047.1	114072503	114072983	peak_9216	481	+	-0.0230180247139	1.0	60.6109510086	peak_3277|peak_3409	utr3	rna-XM_027452187.1	319	437	327	220	156	130	353	403	437	243	166	206
RAB15	NC_040050.1	34455859	34456226	peak_7068	368	-	-0.0230962259249	1.0	60.6109510086	NA|peak_8272	cds	rna-XM_027459037.1	64	55	51	51	45	25	209	159	131	144	99	97
ST8SIA5	NC_040075.1	2849630	2869961	peak_17413	20332	+	-0.0230167670511	1.0	60.6109510086	NA|peak_18299	utr5	rna-XM_027446984.1	33	97	53	37	66	29	118	307	186	113	244	171
CRYBG3	NC_040046.1	108610933	108621688	peak_11342	10756	-	-0.0230962259249	1.0	60.6109510086	peak_1855|peak_1964	cds	rna-XM_027449398.1	155	287	244	119	198	124	172	154	143	145	77	65
PDCL3	NC_040046.1	65446404	65448799	peak_10792	2396	-	-0.0230962259249	1.0	60.6109510086	peak_1624|peak_1721	cds	rna-XM_027446089.1	5814	11157	9332	4334	5776	4333	7970	10075	8445	4956	4584	4830
LANCL2	NC_040047.1	56709091	56709182	peak_8658	92	+	-1.02309622592	0.622022411019	249.822057759	peak_3032|peak_3158	utr3	rna-XM_005014930.2	125	213	189	94	154	80	201	279	181	137	124	113
TRPS1	NC_040047.1	141251539	141251810	peak_9526	272	-	-0.0230974879642	1.0	60.6109510086	NA|peak_4415	cds	rna-XM_027452624.1	104	364	315	72	150	108	1799	1730	1752	937	584	594
2a9b7f22-aaf8-47a6-989a-abd5602cd365	NC_040075.1	10343727	10344518	peak_17498	792	-	-1.02309622592	0.622022411019	249.822057759	peak_17992,peak_17993|peak_18808,peak_18809	NP_exon	2a9b7f22-aaf8-47a6-989a-abd5602cd365.trans	476	841	712	367	472	355	612	750	598	441	326	358
GRIK4	NC_040070.1	4479968	4480059	peak_18429	92	+	1.56210214033	0.625027232164	248.678422516	peak_16468|NA	utr3	rna-XM_027444301.1	2	7	13	4	3	0	43	27	55	42	27	29
KAT6B	NC_040051.1	22727863	22728104	peak_3295	242	+	0.976903774075	1.0	60.6109510086	peak_8341|NA	cds	rna-XM_027460723.1	173	305	271	143	157	101	234	375	362	214	236	226
MAD1L1	NC_040060.1	5323415	5350167	peak_13284	26753	+	-0.0230167670511	1.0	60.6109510086	NA|peak_13536	cds	rna-XM_021272845.2	319	458	421	266	374	193	533	278	615	426	418	410
PDE4D	NC_040075.1	19097957	19098140	peak_17606	184	-	0.43813624942	0.724411120491	245.796437988	peak_18053|NA	cds	rna-XM_027446872.1	64	48	49	36	7	4	98	56	58	26	9	26
CCDC18	NC_040053.1	35587855	35588645	peak_2831	791	-	-0.0230962259249	1.0	60.6109510086	NA|peak_10504	cds	rna-XM_005026544.4	52	67	95	51	63	46	62	92	84	82	45	33
RTF2	NC_040066.1	9629015	9629496	peak_6066	482	+	-0.0230962259249	1.0	60.6109510086	peak_15379|peak_16058	utr3	rna-XM_005010411.4	552	973	793	434	457	420	220	269	196	134	141	114
TNFRSF11A	NC_040047.1	77543671	77543762	peak_8841	92	+	-0.0230962259249	1.0	60.6109510086	NA|peak_3242	utr3	rna-XM_027451672.1	47	112	105	40	79	49	142	86	107	60	83	68
PNISR	NC_040048.1	75432777	75438390	peak_15458	5614	+	-0.0230949640235	1.0	60.6109510086	peak_4883|peak_5120	utr5	rna-XM_021273622.2	449	831	714	607	707	506	891	1114	872	886	882	848
MAGI1	NC_040058.1	6731861	6732252	peak_1323	392	+	-0.0230180247139	1.0	60.6109510086	peak_12035|peak_12582	utr3	rna-XM_027467720.1	104	219	280	65	120	88	413	571	585	238	238	251
CAMSAP1	NC_040063.1	9120157	9120482	peak_18951	326	+	-0.0230962259249	1.0	60.6109510086	peak_14000|peak_14640	cds	rna-XM_021276365.2	268	583	440	252	282	253	491	490	562	411	237	311
TMEM131L	NC_040049.1	31658259	31662941	peak_19847	4683	-	-0.0230962259249	1.0	60.6109510086	peak_6572|peak_6845	cds	rna-XM_027456641.1	942	1990	1596	837	1220	779	1950	2602	1866	1516	1332	1223
NOVA1	NC_040050.1	46555991	46556381	peak_7460	391	-	-0.0230180247139	1.0	60.6109510086	peak_8057|peak_8435	cds	rna-XM_027458958.1	364	644	502	230	232	212	383	564	487	284	201	207
RNF144B	NC_040047.1	50908732	50908883	peak_8594	152	-	-0.0230962259249	1.0	60.6109510086	NA|peak_3989	utr5	rna-XM_027451227.1	42	116	40	39	28	34	37	56	28	27	14	28
RBM19	NC_040061.1	8207714	8214316	peak_20837	6603	-	-0.0230167670511	1.0	60.6109510086	peak_13673|peak_14315	cds	rna-XM_027469898.1	561	1054	921	535	560	486	1107	1688	1461	1028	975	1065
NCOR1	NC_040065.1	9515065	9515395	peak_4777	331	+	-0.0230962259249	1.0	60.6109510086	peak_14821|peak_15494	cds	rna-XM_027472454.1	621	1102	1006	563	723	566	1081	1257	1081	910	670	709
MYLK4	NC_040047.1	78235532	78235593	peak_8862	62	+	-0.0230962259249	1.0	60.6109510086	NA|peak_3252	utr3	rna-XM_027450198.1	38	85	38	28	70	22	76	94	79	70	43	48
SMAD2	NC_040075.1	2454235	2454476	peak_17408	242	+	0.0230962259249	1.0	60.6109510086	peak_17509|NA	cds	rna-XM_027446301.1	581	1104	884	405	546	388	813	880	842	635	371	461
DTX2	NC_040065.1	12194610	12194878	peak_4950	269	+	-0.0230962259249	1.0	60.6109510086	peak_14922|peak_15595	utr3	rna-XM_027472064.1	449	780	673	321	461	348	488	601	466	306	338	263
ADAMTS2	NC_040059.1	6925696	6926026	peak_16991	331	-	-0.0230962259249	1.0	60.6109510086	peak_12708|peak_13284	utr3	rna-XM_027468534.1	1178	1600	1803	858	710	682	1327	1439	1598	879	625	858
SDK1	NC_040060.1	4635355	4635446	peak_13257	92	-	-1.02317568918	0.622012251195	633.83074332	NA|peak_13804	utr5	rna-XM_021272858.2	7	12	6	5	11	3	49	28	50	19	19	14
UNC5D	NC_040068.1	1184961	1185052	peak_1018	92	+	0.97706143416	1.0	60.6109510086	peak_16087|NA	utr3	rna-XM_027443553.1	17	34	27	16	12	5	24	20	13	15	10	17
WDR81	NC_040065.1	10814728	10814939	peak_4875	212	-	0.976903774075	1.0	60.6109510086	peak_15216|peak_15892	utr3	rna-XM_027472104.1	195	482	375	113	234	173	556	496	432	332	257	319
PCOLCE2	NC_040054.1	24129816	24129935	peak_14191	120	-	-1.02309622592	0.622022411019	249.822057759	NA|peak_11037	utr3	rna-XM_027464108.1	4	7	6	2	4	4	26	16	28	26	4	6
C4H4orf50	NC_040049.1	63833847	63835192	peak_20329	1346	-	-0.0230962259249	1.0	60.6109510086	peak_6795|peak_7068	cds	rna-XM_013099424.3	532	831	697	441	481	302	131	135	118	100	78	80
PBX3	NC_040063.1	10947098	10947458	peak_19028	361	+	-0.0230974879642	1.0	60.6109510086	peak_14034|peak_14672	utr3	rna-XM_027470859.1	210	314	254	94	141	86	378	488	493	204	190	190
RNF34	NC_040061.1	12141001	12141181	peak_20983	181	+	-0.0230962259249	1.0	60.6109510086	NA|peak_14175	cds	rna-XM_027469663.1	219	397	254	209	267	152	353	469	431	298	265	322
TRAF3IP1	NC_040052.1	14741741	14744589	peak_5214	2849	+	-0.0230962259249	1.0	60.6109510086	peak_8800|peak_9195	utr3	rna-XM_027461518.1	115	207	195	89	147	88	151	231	175	138	131	124
LOC113841566	NW_020866196.1	27699	27819	peak_4218	121	+	-0.0231769555916	1.0	60.6109510086	peak_18484|peak_19295	NP_exon	gene-LOC113841566.trans	15	37	45	12	12	12	117	60	91	42	19	19
HTR1F	NC_040046.1	107244608	107244699	peak_11280	92	+	-11.6157787502	0.0	0.0	NA|peak_578	cds	rna-XM_013097677.3	0	0	0	13	0	6	12	23	13	10	4	4
FGF12	NC_040054.1	11934780	11934841	peak_13875	62	-	-0.0230962259249	1.0	60.6109510086	NA|peak_10883	utr5	rna-XM_027463962.1	48	80	61	37	42	26	54	66	82	29	35	32
5ed4af64-d151-443f-8cb1-e331006706ab	NC_040050.1	27051515	27051706	peak_6880	192	+	0.0230167670511	1.0	60.6109510086	peak_7176,peak_7177|NA	NP_exon	5ed4af64-d151-443f-8cb1-e331006706ab.trans	88	137	95	101	62	81	53	61	122	62	51	95
HLF	NC_040064.1	8070119	8070180	peak_1997	62	+	0.0230167670511	1.0	60.6109510086	peak_14394|NA	utr3	rna-XM_027471458.1	71	121	90	78	70	62	116	130	140	96	104	99
NCOA3	NC_040066.1	1289993	1290084	peak_5810	92	-	-0.0231744228972	1.0	60.6109510086	NA|peak_16199	cds	rna-XM_027473329.1	31	75	62	37	70	41	97	127	106	78	73	74
CARS2	NC_040046.1	59450994	59451054	peak_10665	61	+	0.0230167670511	1.0	60.6109510086	peak_297|NA	utr3	rna-XM_027444250.1	39	42	71	12	29	59	47	46	40	73	43	15
LOC101800452	NC_040059.1	17131173	17131383	peak_17321	211	+	0.0230962259249	1.0	60.6109510086	peak_12655|NA	NP_exon	rna-XR_002403931.2	60	121	109	49	78	40	68	98	149	49	42	107
LOC101798011	NC_040052.1	24695610	24695760	peak_5518	151	+	0.976980717486	0.687534862081	234.909806279	peak_8996|peak_9377	utr3	rna-XM_027461352.1	36	33	24	11	10	5	15	21	23	8	6	10
ANKRD44	NC_040052.1	5956095	5958474	peak_5080	2380	+	-0.0230962259249	1.0	60.6109510086	peak_8745|peak_9140	cds	rna-XM_027461803.1	455	748	719	428	545	458	438	588	450	353	390	281
STRN3	NC_040050.1	48049427	48049757	peak_7466	331	-	-1.02309622592	0.622022411019	249.822057759	peak_8060|peak_8437	utr3	rna-XM_027458559.1	697	1172	1038	581	691	517	1084	1449	1154	882	569	649
CBFA2T2	NC_040066.1	2860198	2860378	peak_5859	181	+	-0.0230962259249	1.0	60.6109510086	NA|peak_15976	utr3	rna-XM_027472907.1	115	323	289	134	214	143	250	323	261	167	223	164
ATAD3A	NC_040067.1	4487139	4487290	peak_16214	152	-	-0.0230167670511	1.0	60.6109510086	NA|peak_16697	utr3	rna-XM_027443170.1	560	1124	1010	619	755	605	1202	1556	1273	1212	918	1065
LOC101792949	NC_040047.1	16241949	16242516	peak_8112	568	+	-0.0230974879642	1.0	60.6109510086	peak_2791|peak_2916	utr3	rna-XM_027450569.1	865	2018	1395	598	777	518	2018	2527	2397	954	974	1040
FAM78A	NC_040063.1	7313579	7313999	peak_18825	421	+	-0.0230962259249	1.0	60.6109510086	peak_13947|peak_14588	utr3	rna-XM_005013235.4	401	922	676	346	435	359	430	453	335	311	300	194
PTK2B	NC_040048.1	116965908	116966149	peak_15952	242	-	-1.60816807443	0.00427474043944	24.436362444	NA|peak_6115	utr3	rna-XM_027455492.1	30	27	31	50	40	24	118	180	124	93	53	55
HOXB1	NC_040073.1	4981206	4981416	peak_3742	211	-	-1.02315007883	0.0848951514905	271.232460283	NA|peak_18088	cds	rna-XM_027445545.1	0	13	17	12	12	11	28	61	71	10	39	51
ALPK3	NC_040056.1	10848754	10848884	peak_315	131	-	-1.02309622592	0.622022411019	249.822057759	NA|peak_11996,peak_11997	utr3	rna-XM_027466655.1	133	497	488	127	288	268	215	162	207	92	100	134
MMRN1	NC_040049.1	11495728	11495909	peak_19538	182	-	-0.0231756891752	1.0	60.6109510086	NA|peak_6711	cds	rna-XM_005019564.4	12	70	31	16	23	15	52	65	93	46	10	26
FAM114A2	NC_040059.1	8687098	8689026	peak_17067	1929	-	-0.0230962259249	1.0	60.6109510086	peak_12742|peak_13328	cds	rna-XM_005026191.4	818	1236	1247	621	841	584	1334	1690	1238	1103	818	775
FCHSD2	NC_040046.1	1709651	1711926	peak_10092	2276	+	-0.0230962259249	1.0	60.6109510086	peak_74|peak_73	utr3	rna-XM_027462102.1	359	616	610	355	392	312	792	1203	938	625	658	672
PDGFA	NC_040060.1	6386398	6386699	peak_13310	302	+	-0.0230962259249	1.0	60.6109510086	peak_12960|peak_13550	utr5	rna-XM_027468879.1	401	682	591	338	378	264	630	936	853	517	439	604
FBF1	NC_040064.1	3449898	3450599	peak_1872	702	+	0.0230167670511	1.0	60.6109510086	peak_14320|NA	cds	rna-XM_027471352.1	439	923	594	379	595	274	1011	635	799	858	432	534
GOPC	NC_040048.1	66847012	66847829	peak_15356	818	+	-0.0230962259249	1.0	60.6109510086	peak_4835|peak_5079	utr3	rna-XM_027454649.1	500	831	651	440	596	315	1028	1056	968	751	671	682
CAB39L	NC_040046.1	27690806	27691710	peak_10459	905	+	0.0230167670511	1.0	60.6109510086	peak_208|NA	utr5	rna-XM_005015250.4	168	448	336	150	243	215	652	733	827	646	459	593
RASA3	NC_040046.1	61557995	61563167	peak_10716	5173	-	-0.0230949640235	1.0	60.6109510086	peak_1565|peak_1667	cds	rna-XM_027444699.1	310	653	502	415	455	394	475	577	481	458	395	366
TTBK2	NC_040050.1	38860532	38860772	peak_7302	241	-	-0.0230180247139	1.0	60.6109510086	peak_7984|peak_8360	cds	rna-XM_027458593.1	40	119	102	24	58	32	122	109	90	55	50	41
LRP3	NC_040057.1	13425790	13426391	peak_19260	602	-	-0.0230974879642	1.0	60.6109510086	peak_11926|peak_12468	cds	rna-XM_005019971.4	262	544	459	154	206	132	464	517	464	231	172	186
LIN9	NC_040048.1	21259852	21271941	peak_14690	12090	+	-0.0230949640235	1.0	60.6109510086	NA|peak_4721	cds	rna-XM_027453688.1	119	113	128	103	124	111	170	251	238	180	229	194
DHRS3	NC_040067.1	2728461	2729061	peak_16131	601	+	-0.0230962259249	1.0	60.6109510086	peak_15794,peak_15795|peak_16503	utr3	rna-XM_027443341.1	248	408	367	207	206	162	562	867	659	366	376	355
ACAA1	NC_040047.1	4737410	4737560	peak_7941	151	-	-0.0230962259249	1.0	60.6109510086	peak_3516|peak_3676	cds	rna-XM_027450358.1	160	357	287	232	175	195	294	326	319	232	174	210
LOC101800696	NC_040075.1	9525997	9526088	peak_17474	92	+	0.0231756891752	1.0	60.6109510086	peak_17534|NA	utr5	rna-XM_005019423.2	30	75	50	32	27	20	62	48	35	29	12	19
GATA2	NC_040058.1	19471432	19472005	peak_1607	574	+	-0.0230180247139	1.0	60.6109510086	peak_12167,peak_12169|peak_12720,peak_12721	utr3	rna-XM_027467602.1	194	223	261	91	93	75	133	163	123	105	40	86
NPM2	NC_040068.1	515243	515421	peak_1006	179	-	-0.608139456313	0.685021649249	256.158615462	peak_16141|peak_16848	utr5	rna-XM_027443475.1	179	180	121	105	81	6	337	289	189	129	84	40
COBLL1	NC_040052.1	25312688	25318903	peak_5525	6216	+	-0.0230167670511	1.0	60.6109510086	peak_9001|peak_9380	cds	rna-XM_027461273.1	496	885	720	469	571	408	579	822	523	550	471	370
LOC110353953	NC_040064.1	7001133	7001647	peak_1987	515	+	-0.0230962259249	1.0	60.6109510086	peak_14387|peak_15043	cds	rna-XM_027471548.1	19730	26989	21983	13931	14328	9150	4973	7558	5296	3601	2968	2856
EXTL3	NC_040048.1	116212317	116212498	peak_15908	182	-	-0.0230962259249	1.0	60.6109510086	peak_5847|peak_6090	cds	rna-XM_027455435.1	579	906	832	559	596	438	614	747	560	429	475	378
COL9A1	NC_040048.1	87659600	87661371	peak_15617	1772	+	-0.976903774075	1.0	60.6109510086	NA|peak_5193	utr3	rna-XM_027455030.1	13	51	32	13	21	13	4776	3711	3530	3558	2110	2588
DMXL2	NC_040057.1	4946732	4946882	peak_19166	151	+	-1.02309622592	0.622022411019	249.822057759	NA|peak_12284	cds	rna-XM_027466785.1	29	63	37	25	29	34	46	47	40	18	9	35
L3MBTL3	NC_040048.1	61023802	61023983	peak_15306	182	-	-1.6081381899	0.371038958738	572.626096768	NA|peak_5817	utr3	rna-XM_027454542.1	67	108	65	54	62	27	60	95	68	39	23	17
SUGP2	NC_040065.1	4027512	4028866	peak_4478	1355	-	-0.0230962259249	1.0	60.6109510086	peak_15026|peak_15701	NP_exon	rna-XR_003501383.1	328	607	408	273	357	263	490	610	558	430	369	351
TXLNG	NC_040046.1	77915180	77922095	peak_10954	6916	+	-0.0230962259249	1.0	60.6109510086	peak_413|peak_433	cds	rna-XM_027448018.1	578	743	486	423	331	237	714	771	797	471	302	462
EXOC6B	NC_040049.1	74947830	74947891	peak_20537	62	+	-0.0230167670511	1.0	60.6109510086	NA|peak_6641	cds	rna-XM_027455873.1	86	118	202	134	79	114	119	261	127	197	133	84
ZNF644	NC_040053.1	36338933	36339293	peak_2859	361	+	-1.02309622592	0.622022411019	249.822057759	peak_9750|peak_10186	cds	rna-XM_027463566.1	298	519	425	212	322	194	518	673	551	398	262	275
N4BP2	NC_040049.1	52506682	52506922	peak_20196	241	-	-0.0230180247139	1.0	60.6109510086	peak_6745|peak_7007	cds	rna-XM_021279430.2	144	339	269	81	134	106	200	329	247	137	96	136
LOC101792808	NC_040046.1	81835595	81836867	peak_11047	1273	+	-0.0230180247139	1.0	60.6109510086	NA|peak_475	cds	rna-XM_027448994.1	26	52	38	18	24	12	65	64	63	40	22	30
ARHGEF16	NC_040067.1	7022676	7022736	peak_16319	61	-	0.97706143416	1.0	60.6109510086	peak_16044|NA	utr3	rna-XM_027443366.1	30	89	65	19	45	17	50	94	59	49	47	50
PFKFB2	NC_040072.1	830187	830248	peak_9742	62	+	0.0230167670511	1.0	60.6109510086	peak_16785|NA	NP_exon	rna-XR_003492562.1	114	159	158	124	101	79	138	151	139	128	116	122
NRIP1	NC_040046.1	101365666	101366381	peak_11261	716	+	-0.0230962259249	1.0	60.6109510086	peak_537|peak_565	utr5	rna-XM_027449283.1	195	341	306	165	173	111	262	261	266	168	126	160
FAM53A	NC_040049.1	68801359	68822155	peak_20434	20797	+	-0.0230180247139	1.0	60.6109510086	peak_6327|peak_6605	utr5	rna-XM_027455706.1	1228	2944	1930	716	1121	555	1421	1393	1178	888	403	498
ADGRG2	NC_040046.1	78952926	78953077	peak_10981	152	-	-0.0230180247139	1.0	60.6109510086	peak_1695|peak_1801	utr5	rna-XM_027448290.1	241	641	423	147	213	191	708	459	905	451	150	426
FAM19A2	NC_040046.1	168718642	168718703	peak_12560	62	+	-0.977138390426	0.687534042138	238.424222522	NA|peak_1132	utr3	rna-XM_027456517.1	6	1	1	0	2	0	12	9	16	4	6	8
IRX5	NC_040057.1	19876111	19876445	peak_19357	335	+	-1.56202268146	0.625027561623	242.178141558	NA|peak_12372	cds	rna-XM_027466917.1	6	36	27	5	10	6	624	578	507	406	284	344
LOC101799732	NC_040046.1	55694588	55694767	peak_10645	180	+	-0.0230962259249	1.0	60.6109510086	NA|peak_302	cds	rna-XM_021269081.2	61	90	75	42	68	39	94	98	97	81	50	59
SRSF7	NC_040048.1	15756285	15756345	peak_14547	61	+	-0.0230962259249	1.0	60.6109510086	NA|peak_4663	utr5	rna-XM_027453480.1	58	118	74	49	59	39	106	107	122	94	59	74
N4BP1	NC_040057.1	16550134	16550285	peak_19313	152	-	-0.0230962259249	1.0	60.6109510086	peak_11952|peak_12503	cds	rna-XM_027467002.1	57	91	73	33	40	35	91	96	85	64	42	31
JMJD1C	NC_040053.1	2640962	2641053	peak_2126	92	-	0.0230962259249	1.0	60.6109510086	peak_9772|NA	cds	rna-XM_027463800.1	88	144	143	70	113	65	118	184	153	83	119	104
RAI14	NC_040075.1	11123841	11123932	peak_17513	92	+	0.0230167670511	1.0	60.6109510086	peak_17549|NA	cds	rna-XM_027446237.1	113	173	163	92	116	71	356	380	321	295	240	235
3087f4e9-cb03-4fb9-8214-405430b9ee3e	NC_040047.1	24443818	24443878	peak_8239	61	-	-1.6081381899	0.371038958738	572.626096768	NA|peak_3811	NP_exon	3087f4e9-cb03-4fb9-8214-405430b9ee3e.trans	4	2	17	9	7	1	13	14	20	2	6	8
KMT2E	NC_040046.1	189163990	189182180	peak_12782	18191	-	-0.0230167670511	1.0	60.6109510086	peak_2541|peak_2662	utr5	rna-XM_027463711.1	1019	1766	1562	992	927	944	1395	1432	1429	1313	904	1192
NPHP3	NC_040047.1	44886583	44887535	peak_8510	953	-	0.976903774075	1.0	60.6109510086	peak_3779|peak_3949	cds	rna-XM_027450120.1	141	222	218	95	126	101	205	252	194	149	133	134
SLC20A2	NC_040049.1	16552333	16552752	peak_19663	420	+	-1.02309622592	0.622022411019	249.822057759	peak_6025|peak_6276	cds	rna-XM_005025118.4	331	786	538	262	465	229	265	348	350	186	107	156
MBD5	NC_040050.1	2045071	2045371	peak_6330	301	+	-1.02309622592	0.622022411019	249.822057759	peak_6910|peak_7202	cds	rna-XM_027458457.1	81	175	123	81	90	72	163	194	186	90	89	70
MYH11	NC_040060.1	9807630	9815318	peak_13409	7689	+	-0.0230962259249	1.0	60.6109510086	peak_13008|peak_13593	utr3	rna-XM_027469317.1	1602	1606	1689	1005	746	725	746	865	725	512	335	341
DENND4A	NC_040056.1	2640390	2640840	peak_117	451	+	-0.0230962259249	1.0	60.6109510086	peak_11016,peak_11017|peak_11498	utr3	rna-XM_027466597.1	132	241	165	93	164	99	181	240	239	159	130	149
VCAN	NC_040075.1	71855408	71855500	peak_18223	93	+	0.0230167670511	1.0	60.6109510086	peak_17904|NA	cds	rna-XM_027446166.1	90	205	156	75	136	47	302	499	436	293	285	343
GRK4	NC_040049.1	66936807	66937379	peak_20380	573	-	-0.0230962259249	1.0	60.6109510086	peak_6819|peak_7100	cds	rna-XM_027456280.1	103	205	139	77	123	83	320	269	292	202	122	189
LOC101798048	NC_040048.1	93764510	93766090	peak_15688	1581	+	-0.0230167670511	1.0	60.6109510086	peak_4989|peak_5229	cds	rna-XM_027455110.1	456	616	407	393	400	191	880	1037	930	853	542	744
CENPF	NC_040048.1	22371303	22372360	peak_14729	1058	+	-0.0230962259249	1.0	60.6109510086	peak_4530|peak_4748	cds	rna-XM_027453723.1	415	962	734	338	469	345	983	1197	849	732	492	442
KDF1	NC_040069.1	2923836	2923987	peak_4073	152	-	-1.02309622592	0.622022411019	249.822057759	NA|peak_17101	utr3	rna-XM_027443886.1	35	107	46	44	37	27	52	141	111	70	34	71
ac1c2d4e-dafd-4642-a48a-efa9374b5ecf	NC_040065.1	4686589	4686655	peak_4532	67	+	-1.02325388615	0.622002253928	736.904754352	NA|peak_15392,peak_15396	NP_exon	ac1c2d4e-dafd-4642-a48a-efa9374b5ecf.trans	19	116	74	64	86	60	159	208	153	74	39	106
PRRC2B	NC_040063.1	7243424	7246211	peak_18814	2788	-	-0.0230962259249	1.0	60.6109510086	peak_14147|peak_14794	cds	rna-XM_027471077.1	765	1423	1175	744	896	692	1155	1655	1536	955	1035	1046
LOC101796526	NC_040046.1	62225027	62227043	peak_10737	2017	-	-0.0230962259249	1.0	60.6109510086	peak_1576|peak_1680	cds	rna-XM_027445003.1	957	1667	1169	819	1064	559	1308	1681	1550	1178	874	998
0e055e74-e250-4169-8e6e-3a2009f1df46	NC_040050.1	41453623	41454103	peak_7394	481	+	-0.0230974879642	1.0	60.6109510086	peak_7416,peak_7418|peak_7756,peak_7758	NP_exon	0e055e74-e250-4169-8e6e-3a2009f1df46.trans	7803	16676	11787	4883	6939	4364	10866	12079	8090	5596	4230	3527
USP32	NC_040065.1	7575032	7575243	peak_4680	212	-	0.976983232949	1.0	60.6109510086	peak_15115|NA	utr3	rna-XM_027471761.1	140	268	285	107	155	112	234	304	211	222	183	158
METTL26	NC_040060.1	12947220	12947906	peak_13531	687	-	-1.02309622592	0.622022411019	249.822057759	peak_13327|peak_13647,peak_13942	utr3	rna-XM_027468958.1	342	267	209	309	96	84	670	760	797	364	356	358
RNF10	NC_040061.1	7337235	7337326	peak_20789	92	-	-0.0230949640235	1.0	60.6109510086	NA|peak_14295	cds	rna-XM_027469988.1	513	1159	842	823	926	844	1146	1230	1136	993	1089	1169
STYX	NC_040050.1	7477384	7484208	peak_6483	6825	+	-0.0230962259249	1.0	60.6109510086	peak_6964|peak_7271	cds	rna-XM_027457738.1	571	985	1346	541	650	848	502	647	670	413	398	475
PSKH1	NC_040056.1	18571286	18571466	peak_617	181	-	-0.0230962259249	1.0	60.6109510086	peak_11618,peak_11619|peak_12135,peak_12136	utr3	rna-XM_005029713.4	158	273	147	109	114	72	146	179	216	73	91	111
PRIM1	NC_040073.1	5787854	5788026	peak_3807	173	-	0.0230962259249	1.0	60.6109510086	peak_17346|NA	cds	rna-XM_027445543.1	683	1393	1283	651	838	728	1486	1541	1350	1085	921	928
SLN	NC_040046.1	16059975	16061524	peak_10243	1550	-	-1.0232551568	0.449416285894	618.684863687	peak_1346|peak_1425	cds	rna-XM_005025925.3	560	1641	917	403	766	363	16	18	30	6	2	10
LOC101796464	NC_040059.1	6347816	6361032	peak_16974	13217	-	-0.608059988685	0.685029977553	239.444841452	peak_12697|peak_13275	utr3	rna-XM_005028652.4	866	2046	1438	712	448	529	2023	2164	1938	972	540	735
PLVAP	NC_040065.1	4312423	4313224	peak_4494	802	+	-0.0230962259249	1.0	60.6109510086	peak_14702|peak_15378	cds	rna-XM_027472410.1	728	1360	1187	726	792	631	1623	1919	1996	1209	1219	1339
SLC25A15	NC_040046.1	26425109	26425960	peak_10419	852	+	-0.0230962259249	1.0	60.6109510086	peak_192|peak_206	utr5	rna-XM_027470933.1	156	277	245	129	175	113	365	529	522	274	288	314
PROM1	NC_040049.1	60771704	60771944	peak_20279	241	+	-1.6081381899	0.371038958738	572.626096768	NA|peak_6540	cds	rna-XM_027457352.1	22	28	47	16	8	35	68	83	55	17	31	29
GATAD2A	NC_040065.1	4253481	4265779	peak_4490	12299	+	-0.0230962259249	1.0	60.6109510086	peak_14698|peak_15375	cds	rna-XM_027472390.1	1771	3151	2412	1231	1445	1051	3088	3715	3661	2301	1653	2032
LOC101792919	NC_040046.1	200138130	200138610	peak_12889	481	-	-0.608059988685	0.685029977553	239.444841452	peak_2581|peak_2721	utr3	rna-XM_027461161.1	90	187	211	52	82	86	371	491	423	167	168	150
MYO5B	NC_040075.1	1812462	1815196	peak_17390	2735	+	1.29906648531	0.453185285431	598.040154774	peak_17500|peak_18284	cds	rna-XM_027446279.1	97	148	159	35	28	25	220	227	187	148	73	121
ARHGAP32	NC_040070.1	1358960	1359021	peak_18334	62	-	-0.0230962259249	1.0	60.6109510086	NA|peak_17267	utr3	rna-XM_027444304.1	90	257	197	127	155	97	155	263	198	153	148	111
ZGRF1	NC_040049.1	3071264	3071564	peak_19414	301	+	-1.02317568918	0.622012251195	633.83074332	NA|peak_6139	cds	rna-XM_013098571.3	51	162	46	47	77	40	162	162	132	58	87	52
LOC101794949	NC_040046.1	143392588	143392709	peak_12004	122	-	0.976981975286	1.0	60.6109510086	peak_2202|NA	utr3	rna-XM_027447294.1	24	45	41	16	15	18	38	56	80	42	18	43
CHID1	NC_040050.1	50810223	50810284	peak_7515	62	-	-1.02309622592	0.622022411019	249.822057759	NA|peak_8449	utr5	rna-XM_027459697.1	26	70	46	29	40	26	39	75	71	44	23	30
KCNJ15	NC_040046.1	91975819	91976178	peak_11152	360	-	-0.0230974879642	1.0	60.6109510086	NA|peak_1881	cds	rna-XM_013093897.3	18	48	86	13	28	24	52	90	78	21	17	48
LOC101794070	NC_040058.1	1857725	1857964	peak_1272	240	-	-1.02309622592	0.622022411019	249.822057759	NA|peak_12783	cds	rna-XM_027467553.1	88	270	164	66	184	69	266	195	239	137	84	123
CCDC18	NC_040053.1	35579897	35581619	peak_2829	1723	-	-1.02309622592	0.622022411019	249.822057759	NA|peak_10503	cds	rna-XM_005026544.4	77	84	102	65	74	35	94	103	107	86	21	48
BMP2	NC_040048.1	8557960	8560582	peak_14419	2623	+	0.561943218207	1.0	60.6109510086	peak_4391|peak_4596	utr5	rna-XM_027453309.1	87	198	118	53	51	27	618	601	855	309	228	368
HRH1	NC_040058.1	14447243	14447923	peak_1441	681	-	-0.0230180247139	1.0	60.6109510086	NA|peak_12843	utr5	rna-XM_027467685.1	10	43	42	6	21	18	54	57	55	38	26	19
PRDX6	NC_040053.1	27386089	27386239	peak_2661	151	+	-0.0230962259249	1.0	60.6109510086	peak_9680|peak_10102	utr3	rna-XM_027462656.1	5778	9188	7873	5685	6116	4819	2391	3526	2206	1876	2102	1604
OBSCN	NC_040047.1	2618679	2618920	peak_7896	242	+	-0.0230962259249	1.0	60.6109510086	peak_2691|peak_2827	cds	rna-XM_027450316.1	623	1123	969	585	697	511	271	263	244	171	148	161
DNTTIP2	NC_040053.1	35389334	35391037	peak_2821	1704	+	-0.0230962259249	1.0	60.6109510086	peak_9739|peak_10177	cds	rna-XM_027462911.1	369	717	586	295	532	322	528	919	840	524	433	596
ANO5	NC_040050.1	59341460	59341671	peak_7693	212	+	0.976903774075	1.0	60.6109510086	peak_7556|peak_7893	utr3	rna-XM_027459378.1	297	547	328	181	301	131	306	244	281	240	145	152
SPSB1	NC_040067.1	4208874	4209024	peak_16192	151	-	-0.0230962259249	1.0	60.6109510086	NA|peak_16686	utr3	rna-XM_005015425.4	115	196	171	120	152	89	191	217	198	149	135	113
MAGI2	NC_040046.1	190608610	190608970	peak_12807	361	-	-0.0230192825141	1.0	60.6109510086	peak_2550|peak_2672	utr3	rna-XM_027455705.1	43	95	98	17	45	15	110	113	121	47	30	53
AXIN2	NC_040064.1	9828150	9828718	peak_2072	569	+	-0.0230962259249	1.0	60.6109510086	peak_14415|peak_15079	cds	rna-XM_027471334.1	32	97	71	20	56	20	377	416	364	197	193	206
457b5501-a2d0-4f5b-b21b-0e4579cf3905	NC_040047.1	25286836	25287137	peak_8248	302	+	0.976903774075	1.0	60.6109510086	peak_2862,peak_2859|peak_2983,peak_2981	NP_exon	457b5501-a2d0-4f5b-b21b-0e4579cf3905.trans	215	264	286	197	133	91	402	327	245	309	133	165
HOXD8	NC_040052.1	21181178	21182224	peak_5443	1047	-	-0.0230974879642	1.0	60.6109510086	peak_9283,peak_9284|peak_9676,peak_9677	utr3	rna-XM_027462060.1	670	1214	1330	439	458	493	1932	1504	1753	984	482	786
CBX6	NC_040046.1	149526824	149526915	peak_12180	92	-	-0.0230167670511	1.0	60.6109510086	NA|peak_2400	utr3	rna-XM_027450812.1	516	1015	756	568	590	558	984	1312	1177	994	691	1037
SLX4	NC_040060.1	11518277	11518547	peak_13463	271	-	-1.02309622592	0.622022411019	249.822057759	peak_13287|peak_13897	utr3	rna-XM_027468905.1	131	214	148	102	156	70	242	259	255	146	147	121
FAM193A	NC_040049.1	67233640	67236274	peak_20399	2635	-	-0.0230962259249	1.0	60.6109510086	peak_6827|peak_7110	cds	rna-XM_027456281.1	213	378	363	186	194	136	441	385	341	265	164	239
PTPRF	NC_040053.1	15376454	15376605	peak_2374	152	-	-0.0230962259249	1.0	60.6109510086	NA|peak_10308	cds	rna-XM_027462884.1	139	301	233	149	207	184	617	718	730	470	473	478
LOC101802012	NC_040066.1	13536742	13536981	peak_6147	240	+	0.976903774075	1.0	60.6109510086	peak_15420|peak_16101	utr3	rna-XM_027473048.1	293	405	417	212	201	216	154	137	172	126	67	105
LOC101804876	NC_040046.1	149217769	149218287	peak_12138	519	+	-0.0230962259249	1.0	60.6109510086	peak_856|peak_920	cds	rna-XM_027450338.1	398	618	622	340	430	359	647	652	673	527	400	475
ZCCHC2	NC_040047.1	77614203	77614623	peak_8846	421	+	-0.0230962259249	1.0	60.6109510086	peak_3115|peak_3245	cds	rna-XM_027451673.1	359	562	476	242	314	210	494	549	605	315	299	281
SPATA13	NC_040046.1	19378297	19378868	peak_10315	572	-	-0.608059988685	0.685029977553	239.444841452	peak_1375|peak_1462	utr3	rna-XM_021274482.2	44	99	63	38	26	23	218	291	205	81	72	76
LOC101799848	NC_040051.1	21128710	21129545	peak_3246	836	-	-0.0230962259249	1.0	60.6109510086	peak_8579|peak_8985	utr3	rna-XM_027460068.1	386	714	540	301	366	301	656	861	612	445	379	470
MYO1B	NC_040052.1	7963749	7966612	peak_5105	2864	-	-0.0230949640235	1.0	60.6109510086	NA|peak_9555	cds	rna-XM_027462077.1	513	1115	914	672	908	586	1297	1809	1601	1518	1397	1375
GALK1	NC_040064.1	3572696	3573212	peak_1881	517	+	0.0230167670511	1.0	60.6109510086	peak_14325|NA	cds	rna-XM_027471306.1	267	461	313	236	329	194	462	233	408	365	160	272
ERGIC2	NC_040046.1	187896352	187896413	peak_12747	62	-	0.0230167670511	1.0	60.6109510086	peak_2520|NA	utr5	rna-XM_005010260.4	454	755	716	461	583	400	865	1120	855	835	759	859
LOC106020629	NC_040046.1	163443352	163443412	peak_12480	61	-	-0.976981975286	1.0	60.6109510086	NA|peak_2503	utr3	rna-XM_027455046.1	10	15	29	6	10	6	32	46	74	39	25	36
LRCH1	NC_040046.1	28677011	28677281	peak_10479	271	-	-0.0230167670511	1.0	60.6109510086	peak_1460|peak_1551	cds	rna-XM_027471723.1	286	508	395	352	176	166	153	219	181	179	178	103
NFYA	NC_040072.1	5651809	5652467	peak_9997	659	+	-0.0230180247139	1.0	60.6109510086	peak_16905|peak_17651	utr3	rna-XM_027445056.1	524	954	816	300	495	277	726	710	766	502	293	318
e71c2772-371b-4188-a134-ce1303e2720c	NC_040050.1	52143310	52143552	peak_7543	243	-	-0.976981975286	1.0	60.6109510086	NA|peak_8458,peak_8460	NP_exon	e71c2772-371b-4188-a134-ce1303e2720c.trans	7	32	29	11	12	7	8	18	11	7	13	2
SLC45A3	NC_040072.1	2361006	2361096	peak_9807	91	+	0.976903774075	1.0	60.6109510086	peak_16812|NA	cds	rna-XM_027444842.1	23	51	56	26	21	26	62	89	66	64	20	61
UBXN2A	NC_040048.1	110673848	110678641	peak_15819	4794	+	0.976903774075	1.0	60.6109510086	peak_5034|peak_5275	utr5	rna-XM_027455309.1	452	765	693	331	376	328	281	343	379	235	200	255
KLC4	NC_040048.1	16280873	16284878	peak_14570	4006	-	-0.0230962259249	1.0	60.6109510086	peak_5276|peak_5523	cds	rna-XM_027453521.1	6591	10003	8002	6057	6121	4524	5208	5760	4921	3671	3192	3605
FYCO1	NC_040047.1	45314321	45314502	peak_8526	182	+	-0.0230962259249	1.0	60.6109510086	NA|peak_3087	utr3	rna-XM_027450146.1	89	178	184	96	94	122	104	138	100	79	89	70
IBSP	NC_040049.1	45339842	45340383	peak_20066	542	+	1.19968600302	0.34383936403	671.234213778	peak_6185|NA	cds	rna-XM_021267714.2	64	217	227	10	32	36	7117	216	7926	2830	38	2180
TLL2	NC_040051.1	21052464	21052909	peak_3244	446	+	-0.0230962259249	1.0	60.6109510086	peak_8320|peak_8721	cds	rna-XM_027460341.1	94	139	106	52	100	66	169	306	330	167	169	192
ATXN1L	NC_040056.1	21708361	21708482	peak_796	122	-	-0.0230962259249	1.0	60.6109510086	NA|peak_12213	utr3	rna-XM_027466679.1	204	369	364	229	249	244	488	680	578	421	355	412
RBM26	NC_040046.1	44123469	44124913	peak_10587	1445	-	-0.0230167670511	1.0	60.6109510086	peak_1504|peak_1609	cds	rna-XM_027442939.1	751	1302	1154	743	928	650	1230	1688	1332	1000	1053	1059
STXBP3	NC_040053.1	31031155	31032039	peak_2765	885	-	-0.0230974879642	1.0	60.6109510086	peak_10024|peak_10477	cds	rna-XM_027463681.1	393	798	736	200	287	263	304	699	286	175	153	217
ZCCHC2	NC_040047.1	77607432	77612546	peak_8844	5115	+	-0.0230167670511	1.0	60.6109510086	peak_3113|peak_3244	cds	rna-XM_027451673.1	391	718	618	414	568	343	600	701	728	623	413	559
CHD6	NC_040066.1	6815880	6815941	peak_5974	62	+	0.0230167670511	1.0	60.6109510086	peak_15346|NA	cds	rna-XM_027442803.1	146	277	263	125	157	138	217	244	313	176	176	205
PWP1	NC_040046.1	146998690	147000441	peak_12069	1752	+	-0.0230962259249	1.0	60.6109510086	peak_825|peak_889	cds	rna-XM_027449914.1	744	1449	1146	652	981	578	1856	2056	1824	1390	1172	1267
PPARGC1A	NC_040049.1	58142163	58151522	peak_20257	9360	+	-1.02309622592	0.622022411019	249.822057759	peak_6250|peak_6525	cds	rna-XM_005031663.4	286	505	363	238	262	210	251	393	220	196	145	140
PDCL	NC_040063.1	9777729	9777820	peak_18986	92	-	-0.0230962259249	1.0	60.6109510086	NA|peak_14872	cds	rna-XM_027470924.1	146	306	166	178	172	62	208	245	198	168	134	139
PRDX1	NC_040053.1	14192697	14192757	peak_2340	61	+	0.976981975286	1.0	60.6109510086	peak_9531|NA	utr5	rna-XM_027463213.1	365	444	280	215	184	110	517	978	769	447	437	431
SYT1	NC_040046.1	161985676	162063748	peak_12459	78073	-	-0.0230949640235	1.0	60.6109510086	NA|peak_2499	utr5	rna-XM_027455350.1	72	140	146	95	144	134	254	217	258	273	144	191
LOC101790332	NC_040065.1	1985356	1996479	peak_4345	11124	-	0.976903774075	1.0	60.6109510086	peak_14972|peak_15645	cds	rna-XM_027472028.1	357	1103	529	360	388	273	641	420	446	474	230	274
LOC101803508	NC_040050.1	52563247	52563607	peak_7552	361	-	0.976903774075	1.0	60.6109510086	peak_8088|peak_8470	cds	rna-XM_027458895.1	219	501	361	135	302	159	334	366	362	304	169	214
CHD4	NC_040046.1	121576393	121577972	peak_11580	1580	-	-0.0230962259249	1.0	60.6109510086	peak_2001|peak_2105	cds	rna-XM_027449741.1	7330	14342	12667	5631	7535	5629	13281	15575	14317	8975	6997	8282
SLC4A3	NC_040052.1	27301125	27301935	peak_5555	811	-	-0.0230962259249	1.0	60.6109510086	NA|peak_9724	cds	rna-XM_027461584.1	77	108	64	101	49	45	166	203	216	105	148	145
KIAA1755	NC_040066.1	15342375	15342615	peak_6261	241	+	-0.0231744228972	1.0	60.6109510086	peak_15477|peak_16158	cds	rna-XM_027472730.1	298	404	306	293	297	253	249	300	150	208	175	112
FAM19A3	NC_040072.1	2057895	2057986	peak_9788	92	+	-0.0231756891752	1.0	60.6109510086	NA|peak_17548	utr3	rna-XM_027444901.1	4	40	9	9	13	5	20	29	17	7	7	12
d07a1874-6dd9-43a7-88b5-131ad5e44ea9	NC_040065.1	5930486	5937283	peak_4603	6798	+	-0.0230962259249	1.0	60.6109510086	peak_14755|peak_15427	NP_exon	d07a1874-6dd9-43a7-88b5-131ad5e44ea9.trans	77	144	106	84	104	56	70	76	84	43	36	68
COMMD10	NC_040075.1	62519042	62519103	peak_18112	62	-	-1.02309622592	0.622022411019	249.822057759	NA|peak_19117	utr3	rna-XM_027446586.1	0	15	18	8	3	9	18	25	12	0	11	20
ING1	NC_040046.1	59406385	59406506	peak_10663	122	-	-0.0230167670511	1.0	60.6109510086	peak_1535|peak_1642	utr5	rna-XM_005031019.3	304	509	392	287	273	216	322	345	298	300	157	242
SFMBT1	NC_040058.1	17220651	17221386	peak_1529	736	-	0.976903774075	1.0	60.6109510086	peak_12338|NA	utr5	rna-XM_027467308.1	32	66	55	30	29	19	56	31	52	36	29	30
C6H10orf71	NC_040051.1	18818450	18818750	peak_3206	301	-	0.976903774075	1.0	60.6109510086	peak_8566|NA	cds	rna-XM_027460286.1	234	438	468	175	284	181	195	149	131	145	118	58
PPM1A	NC_040050.1	10075302	10090643	peak_6552	15342	+	-0.0230962259249	1.0	60.6109510086	peak_7010|peak_7321	utr3	rna-XM_027458298.1	2708	4655	3676	1954	2400	1575	4614	4657	4521	2876	2233	2529
ARAP3	NC_040059.1	14009620	14009979	peak_17263	360	-	-0.0230962259249	1.0	60.6109510086	peak_12814|peak_13397	cds	rna-XM_027468307.1	259	760	428	217	322	230	307	514	437	210	143	240
TRMT2A	NC_040061.1	4185319	4186372	peak_20643	1054	+	0.0230167670511	1.0	60.6109510086	peak_13407|NA	cds	rna-XM_027470247.1	811	1481	1187	957	918	678	951	1625	1529	765	1031	1165
DDX58	NC_040075.1	63294057	63296440	peak_18129	2384	+	-0.0230962259249	1.0	60.6109510086	NA|peak_18662	cds	rna-NM_001310380.1	135	324	245	140	175	154	224	277	210	143	168	142
CACNA1C	NC_040046.1	138512242	138512423	peak_11887	182	-	-0.0230962259249	1.0	60.6109510086	NA|peak_2261	utr3	rna-XM_027463136.1	14	37	46	22	13	31	194	267	265	126	139	189
PUSL1	NC_040067.1	4762263	4762414	peak_16236	152	-	0.561944476007	1.0	60.6109510086	peak_16007|NA	utr5	rna-XM_005008821.4	28	19	30	15	7	4	16	42	18	10	5	22
CDC73	NC_040053.1	28426656	28426866	peak_2716	211	+	-2.0232551568	0.215045056389	487.780931776	peak_9706|peak_10137	utr3	rna-XM_027463262.1	59	109	109	72	65	67	143	165	131	62	27	31
LOC113839627	NW_020866472.1	14295	14572	peak_1206	278	+	-0.608059988685	0.685029977553	239.444841452	peak_18516,peak_18515|peak_19322,peak_19323	cds	rna-XM_027448455.1	366	966	658	225	330	233	1041	1424	1169	447	373	461
ARPP19	NC_040057.1	2797016	2801504	peak_19117	4489	+	-1.02309622592	0.622022411019	249.822057759	peak_11735|peak_12261	cds	rna-XM_027467097.1	1687	3167	2417	1415	1755	1144	3996	5566	5242	2381	2799	2955
ZFHX3	NC_040056.1	21521987	21522407	peak_778	421	+	-0.0230962259249	1.0	60.6109510086	peak_11312|peak_11816	cds	rna-XM_027466394.1	538	920	840	429	492	379	1282	1717	1629	731	696	840
PTPRN2	NC_040047.1	9128681	9128802	peak_8019	122	-	4.21764682572	2.18769447004e-39	1.64047425472e-34	peak_3560|NA	utr3	rna-XM_027450443.1	2	7	6	0	1	0	8	13	10	20	3	13
PRDM10	NC_040070.1	1870025	1870457	peak_18349	433	+	0.0231744228972	1.0	60.6109510086	peak_16431|NA	cds	rna-XM_021272504.2	32	56	85	57	75	35	69	67	98	66	48	49
ACBD4	NC_040073.1	1350682	1350743	peak_3533	62	-	0.43821445487	0.724404069178	246.450021009	peak_17251|NA	utr5	rna-XM_027445723.1	24	23	19	13	0	10	61	26	35	10	16	8
MYCT1	NC_040048.1	52055503	52055982	peak_15175	480	+	-0.0230962259249	1.0	60.6109510086	peak_4728|peak_4974	utr3	rna-XM_005024789.4	601	1129	794	417	474	316	461	657	364	261	270	236
RBBP8NL	NC_040066.1	12564677	12566301	peak_6120	1625	-	-0.0230962259249	1.0	60.6109510086	NA|peak_16350	cds	rna-XM_021278653.2	116	185	87	0	126	61	180	196	191	29	127	166
LOC101790579	NC_040048.1	111965366	111966438	peak_15845	1073	+	0.976903774075	1.0	60.6109510086	peak_5043,peak_5044|peak_5285	cds	rna-XM_027455330.1	344	813	432	278	354	227	702	680	808	445	293	543
KALRN	NC_040052.1	27882732	27888137	peak_5597	5406	-	-0.0230962259249	1.0	60.6109510086	peak_9333|peak_9737	cds	rna-XM_027461535.1	118	255	205	130	197	86	344	362	321	252	217	224
KLHL14	NC_040047.1	112118603	112119279	peak_9201	677	+	-0.0231756891752	1.0	60.6109510086	NA|peak_3398	cds	rna-XM_027452170.1	8	11	7	2	8	4	61	80	73	33	30	31
E2F8	NC_040050.1	58128248	58128368	peak_7678	121	-	-0.0231744228972	1.0	60.6109510086	peak_8142|peak_8525	cds	rna-XM_027458931.1	128	142	161	112	157	94	139	203	163	99	117	90
MME	NC_040054.1	1141324	1141505	peak_13653	182	+	-0.0230167670511	1.0	60.6109510086	NA|peak_10537	utr5	rna-XM_013103509.3	4	34	33	2	19	26	99	83	168	104	59	121
SMG7	NC_040053.1	23620032	23620153	peak_2504	122	-	-0.0230962259249	1.0	60.6109510086	NA|peak_10365	utr3	rna-XM_027463819.1	158	232	274	127	158	143	297	396	409	257	204	236
MFGE8	NC_040056.1	8073013	8073223	peak_225	211	-	0.976903774075	1.0	60.6109510086	peak_11431|peak_11950	utr3	rna-XM_027466128.1	253	589	440	289	191	230	427	543	649	377	270	449
WDR7	NC_040075.1	673629	673840	peak_17369	212	-	-0.0230962259249	1.0	60.6109510086	NA|peak_18749	cds	rna-XM_027447010.1	100	158	97	68	94	81	124	176	156	99	89	90
COPS7B	NC_040054.1	9805779	9806079	peak_13828	301	-	-1.02317568918	0.622012251195	633.83074332	peak_10396|peak_10858	utr3	rna-XM_027464220.1	548	383	328	256	350	124	1017	1371	540	435	263	473
RAD50	NC_040059.1	3475091	3481451	peak_16906	6361	-	-0.0230962259249	1.0	60.6109510086	peak_12682|peak_13257	cds	rna-XM_027468667.1	1361	2513	2174	941	1396	921	2689	2985	2722	1805	1194	1464
LOC101790203	NC_040073.1	2825414	2825534	peak_3594	121	-	-0.0230167670511	1.0	60.6109510086	NA|peak_18028	utr3	rna-XM_027445278.1	372	844	445	348	355	336	443	504	506	288	444	379
ZFR	NC_040075.1	10360145	10361780	peak_17499	1636	-	-0.0230962259249	1.0	60.6109510086	peak_17994|peak_18810	cds	rna-XM_027446295.1	1843	3827	2930	1367	1871	1168	2542	3039	2521	1841	1314	1192
ZNF521	NC_040047.1	115038718	115061518	peak_9228	22801	+	-0.0230962259249	1.0	60.6109510086	peak_3285|peak_3419	utr5	rna-XM_013095734.3	460	900	830	394	500	406	1322	1560	1457	1119	807	1106
LGI1	NC_040051.1	16872591	16872829	peak_3161	239	+	-0.0230192825141	1.0	60.6109510086	NA|peak_8680	utr5	rna-XM_027460398.1	15	40	29	6	14	8	74	85	62	35	30	20
LOC101803486	NC_040054.1	13204110	13204291	peak_13903	182	+	-0.0230962259249	1.0	60.6109510086	peak_10175|peak_10637	cds	rna-XM_013094581.3	270	476	388	241	319	192	358	353	421	251	219	270
PIAS2	NC_040075.1	2803101	2811508	peak_17411	8408	+	-0.0230180247139	1.0	60.6109510086	peak_17511|peak_18296	cds	rna-XM_027446594.1	484	891	614	280	352	288	846	999	1070	546	439	474
IKZF5	NC_040051.1	4551237	4551597	peak_2915	361	+	-0.0230962259249	1.0	60.6109510086	peak_8180|peak_8573	cds	rna-XM_027460830.1	357	677	392	231	313	196	497	565	625	284	217	339
OSGIN2	NC_040047.1	130565532	130565713	peak_9407	182	+	-0.0230962259249	1.0	60.6109510086	peak_3384|peak_3525	NP_exon	rna-XR_003495759.1	61	122	100	49	57	37	166	197	253	150	91	112
CREG2	NC_040046.1	65098310	65098641	peak_10784	332	+	-0.0231756891752	1.0	60.6109510086	NA|peak_340	NP_exon	rna-XR_003492774.1	89	233	177	47	144	68	258	271	313	148	94	126
LOC101794979	NC_040054.1	24017461	24017676	peak_14185	216	-	0.0230962259249	1.0	60.6109510086	peak_10566|NA	cds	rna-XM_027463916.1	119	171	163	87	130	85	208	204	223	139	137	174
MAP3K15	NC_040046.1	79054906	79060136	peak_10982	5231	-	-1.02309622592	0.622022411019	249.822057759	NA|peak_1802	cds	rna-XM_027448311.1	40	23	28	23	19	19	24	34	47	20	20	12
ARIH1	NC_040056.1	11742784	11745597	peak_357	2814	+	-0.0230949640235	1.0	60.6109510086	peak_11126|peak_11605	utr3	rna-XM_027466212.1	845	1580	1430	1057	1128	1019	1329	1874	1529	1511	1415	1321
CYLD	NC_040057.1	17697848	17700058	peak_19336	2211	+	0.976903774075	1.0	60.6109510086	peak_11827|peak_12358	cds	rna-XM_027467203.1	191	359	256	133	170	95	280	283	327	197	163	179
CRADD	NC_040046.1	155913246	155913486	peak_12308	241	+	-0.608138189896	0.685021782428	249.71257932	peak_921|peak_1003	utr3	rna-XM_021267434.2	25	58	54	15	34	24	74	53	68	21	23	20
KCND3	NC_040072.1	1665461	1665522	peak_9775	62	-	-3.60901126019	0.00169479058549	11.5533015182	NA|peak_17686	utr3	rna-XM_027444755.1	0	1	4	3	0	2	10	22	1	1	2	0
NAT10	NC_040050.1	52735265	52735326	peak_7568	62	+	0.0230949640235	1.0	60.6109510086	peak_7497|NA	cds	rna-XM_027458329.1	20	45	35	24	57	25	30	74	66	47	51	55
ZCCHC14	NC_040056.1	19532275	19532545	peak_682	271	-	-0.0230962259249	1.0	60.6109510086	NA|peak_12172	cds	rna-XM_027466672.1	221	425	459	270	327	268	251	378	291	198	220	204
LOC113839660	NC_040066.1	14779176	14779266	peak_6203	91	-	0.507467425899	0.523750222119	654.569431466	peak_15680|NA	utr3	rna-XM_027442887.1	108	6	4	21	0	79	70	28	0	104	16	3
CCDC88A	NC_040048.1	5900077	5900928	peak_14371	852	-	-1.02309622592	0.622022411019	249.822057759	peak_5186|peak_5435	cds	rna-XM_027453244.1	216	352	298	157	213	184	460	527	457	293	239	262
AGPAT2	NC_040063.1	8554462	8554582	peak_18916	121	+	-1.29906523599	0.453185294496	591.30685882	NA|peak_14613	utr3	rna-XM_027471122.1	55	100	69	11	25	8	91	104	108	32	16	75
HMG20B	NC_040065.1	1242372	1242987	peak_4306	616	+	-0.0230962259249	1.0	60.6109510086	peak_14604|peak_15282	cds	rna-XM_027472077.1	1540	2414	2324	1509	1520	1236	3045	3976	3677	2082	2411	2532
ACSS2	NC_040066.1	3327661	3328108	peak_5880	448	-	-0.0230962259249	1.0	60.6109510086	peak_15552|peak_16237	utr3	rna-XM_027442830.1	967	1880	1500	791	1079	795	1647	1280	1629	1058	732	910
WAPL	NC_040051.1	28934439	28954057	peak_3365	19619	+	-0.0230180247139	1.0	60.6109510086	peak_8375|peak_8774	cds	rna-XM_027459743.1	3012	5625	4740	1971	2491	1693	5403	6693	5628	3326	2520	2527
PPP1R8	NC_040069.1	5972557	5972648	peak_4163	92	+	-0.0230949640235	1.0	60.6109510086	NA|peak_17009	utr3	rna-XM_027444081.1	183	312	280	189	305	206	416	505	412	349	268	387
DNMT3B	NC_040066.1	15185053	15185743	peak_6252	691	+	-0.0230962259249	1.0	60.6109510086	peak_15471|peak_16153	utr3	rna-XM_027472735.1	546	1895	1224	401	847	517	1038	1202	1030	558	521	557
SHOX	NC_040046.1	68985799	68994275	peak_10861	8477	+	-0.0230962259249	1.0	60.6109510086	peak_366|peak_379	cds	rna-XM_027447095.1	312	729	681	289	342	319	1046	1372	1069	820	521	652
VIRMA	NC_040047.1	132378526	132380672	peak_9436	2147	-	0.561865012757	1.0	60.6109510086	peak_4169|peak_4367	cds	rna-XM_027452477.1	1597	2862	2430	792	1113	611	2527	3100	3348	1424	953	1310
NDUFAF2	NC_040075.1	19467090	19479624	peak_17609	12535	+	-0.0230167670511	1.0	60.6109510086	peak_17597|peak_18384	cds	rna-XM_027446061.1	301	617	584	271	350	265	466	637	723	545	355	498
AGTR1	NC_040059.1	1690479	1690719	peak_16827	241	+	0.976983232949	1.0	60.6109510086	peak_12406|NA	cds	rna-XM_027468300.1	35	79	44	21	42	18	34	56	38	49	34	42
SPSB4	NC_040054.1	19715105	19715165	peak_14117	61	-	-1.19350064929	0.17615792112	449.12149767	NA|peak_10999	utr3	rna-XM_027464342.1	2	48	28	0	1	20	44	51	0	0	0	0
LOC101802664	NC_040051.1	21787285	21787975	peak_3279	691	+	-0.0230180247139	1.0	60.6109510086	peak_8331,peak_8332|peak_8731	cds	rna-XM_027460215.1	734	1592	1109	510	705	404	1274	1822	1639	738	682	729
CRLF1	NC_040065.1	3779297	3779418	peak_4457	122	-	-0.0230962259249	1.0	60.6109510086	NA|peak_15690	cds	rna-XM_027472413.1	47	42	71	52	47	18	322	310	409	240	164	213
LOC101799732	NC_040046.1	55694885	55695095	peak_10646	211	+	-0.0230962259249	1.0	60.6109510086	NA|peak_303	cds	rna-XM_021269081.2	62	121	105	57	117	33	122	123	161	83	70	86
ANO6	NC_040046.1	170795746	170796227	peak_12582	482	-	-0.0230962259249	1.0	60.6109510086	peak_2439|peak_2563	utr3	rna-XM_027456779.1	96	156	110	66	66	53	391	315	375	198	112	185
HS6ST2	NC_040055.1	13073996	13074653	peak_16729	658	-	-0.0230974879642	1.0	60.6109510086	peak_10923|peak_11403	cds	rna-XM_027464993.1	2370	4000	2793	1138	1261	851	2184	2309	1685	867	675	554
RIMKLB	NC_040046.1	123690375	123690615	peak_11687	241	+	-0.0230962259249	1.0	60.6109510086	peak_680|peak_737	utr3	rna-XM_027449868.1	182	305	291	153	214	135	246	253	262	176	128	149
HECTD1	NC_040050.1	48137227	48137288	peak_7470	62	-	-0.0230167670511	1.0	60.6109510086	NA|peak_8441	cds	rna-XM_027458551.1	425	786	613	435	560	367	693	868	732	562	500	601
SVIL	NC_040047.1	15553026	15554186	peak_8097	1161	-	-0.0230962259249	1.0	60.6109510086	peak_3593|peak_3747	cds	rna-XM_027452883.1	4414	8729	6679	3323	4748	2744	5810	7487	5970	4080	3104	3137
LOC101795933	NC_040050.1	34637410	34638450	peak_7085	1041	+	0.976981975286	1.0	60.6109510086	peak_7266|peak_7591	cds	rna-XM_005029958.4	243	412	319	118	184	114	349	457	592	242	191	390
LOC113840233	NC_040075.1	25717842	25717902	peak_17724	61	-	-0.0230167670511	1.0	60.6109510086	NA|peak_18917	cds	rna-XM_027446841.1	92	253	151	80	157	82	332	396	376	324	245	258
MCC	NC_040075.1	57378454	57394758	peak_18066	16305	-	-0.0230962259249	1.0	60.6109510086	peak_18264,peak_18265|peak_19090	cds	rna-XM_027446642.1	216	438	395	164	278	181	412	590	491	326	305	332
PPP1R9A	NC_040047.1	25357327	25456981	peak_8250	99655	+	-0.0230962259249	1.0	60.6109510086	peak_2864,peak_2865|peak_2985	cds	rna-XM_021279668.2	779	1691	1130	697	1167	555	981	1229	1077	821	616	750
LOC101799215	NC_040048.1	28938891	28938982	peak_14812	92	-	1.97768475737	0.0352046371268	137.240973788	peak_5382|NA	cds	rna-XM_027453136.1	2	26	6	0	3	0	20	16	8	6	5	4
GRIN2B	NC_040046.1	159562345	159562706	peak_12390	362	-	-0.608059988685	0.685029977553	239.444841452	peak_2359|peak_2490	cds	rna-XM_005012191.4	25	34	40	2	22	21	70	110	72	21	39	35
LOC101804102	NC_040047.1	885701	885761	peak_7852	61	+	1.02309622592	0.622022411019	249.822057759	peak_2655|NA	NP_exon	rna-XR_003495121.1	78	143	172	82	70	92	117	316	302	112	156	154
RAB18	NC_040047.1	16662635	16664475	peak_8117	1841	-	-0.0230962259249	1.0	60.6109510086	peak_3606|peak_3760	utr3	rna-XM_027450586.1	2347	4213	3681	1789	2382	1604	4224	5123	4532	3091	2321	2577
LOC101801351	NC_040075.1	16918028	16921705	peak_17579	3678	+	-1.02309622592	0.622022411019	249.822057759	peak_17585,peak_17586|peak_18374	NP_exon	rna-XR_003492953.1	190	350	295	164	215	132	395	462	413	288	151	219
ZBTB33	NC_040055.1	3524815	3526429	peak_16436	1615	-	-0.0230180247139	1.0	60.6109510086	peak_10790|peak_11264	cds	rna-XM_027465526.1	138	350	286	109	104	91	311	441	324	171	166	145
GAS2L1	NC_040061.1	9598811	9599199	peak_20869	389	-	-0.0230974879642	1.0	60.6109510086	peak_13694|peak_14338	cds	rna-XM_027469795.1	1191	2182	2419	1004	644	925	1495	2177	1849	908	727	792
CHPF2	NC_040047.1	190445	191694	peak_7784	1250	+	-0.0230962259249	1.0	60.6109510086	peak_2612|peak_2751,peak_2752	utr3	rna-XM_005029500.4	1092	2275	1731	721	1101	671	2415	2969	2797	1456	1287	1338
KIAA1958	NC_040075.1	68509969	68510238	peak_18193	270	+	0.976903774075	1.0	60.6109510086	peak_17892|NA	cds	rna-XM_027447094.1	90	151	94	48	78	62	52	68	59	39	32	44
USP37	NC_040052.1	36311460	36312095	peak_5738	636	+	-0.0231744228972	1.0	60.6109510086	NA|peak_9494	cds	rna-XM_013101053.3	84	267	214	174	193	124	229	376	280	219	204	209
TENM3	NC_040049.1	20978192	20978403	peak_19744	212	-	-0.0230962259249	1.0	60.6109510086	NA|peak_6791	cds	rna-XM_027456308.1	29	80	79	42	61	39	133	156	139	106	71	73
LRRC8A	NC_040063.1	8161791	8161942	peak_18874	152	-	-0.976983232949	1.0	60.6109510086	NA|peak_14831	utr3	rna-XM_027470672.1	159	256	259	138	137	102	155	275	158	146	135	149
BRPF1	NC_040058.1	21920943	21921034	peak_1677	92	+	-0.0230962259249	1.0	60.6109510086	NA|peak_12756	cds	rna-XM_027467357.1	177	264	233	149	165	133	320	144	399	229	244	58
SHPRH	NC_040048.1	49048088	49048389	peak_15113	302	-	-1.02317568918	0.622012251195	633.83074332	peak_5515|peak_5755	cds	rna-XM_027454308.1	114	144	149	88	97	64	218	209	224	100	59	97
ARSB	NC_040075.1	22912073	22935416	peak_17671	23344	+	-0.0230962259249	1.0	60.6109510086	peak_17630|peak_18422	cds	rna-XM_027446693.1	144	263	285	107	219	165	218	340	237	211	179	166
CASKIN2	NC_040064.1	3859684	3859984	peak_1906	301	+	-0.0230962259249	1.0	60.6109510086	peak_14332|peak_14997	cds	rna-XM_027471486.1	264	496	661	209	311	311	334	414	388	262	199	234
IQSEC3	NC_040046.1	140038829	140040218	peak_11938	1390	-	0.0230167670511	1.0	60.6109510086	peak_2176|NA	cds	rna-XM_027467847.1	169	385	289	129	246	146	402	745	465	403	416	416
SLC45A3	NC_040072.1	2351683	2354810	peak_9806	3128	+	-1.02309622592	0.622022411019	249.822057759	peak_16811|peak_17560	utr5	rna-XM_027444842.1	134	224	57	56	117	82	252	541	351	193	247	198
DMD	NC_040046.1	85345677	85348642	peak_11081	2966	+	-0.0230962259249	1.0	60.6109510086	peak_460|peak_491	cds	rna-XM_027454497.1	565	899	671	452	601	274	180	264	229	133	127	153
RAB21	NC_040046.1	164788598	164788718	peak_12493	121	-	0.0230167670511	1.0	60.6109510086	peak_2384|NA	cds	rna-XM_027455527.1	338	634	496	371	351	268	607	609	756	548	438	511
G3BP1	NC_040059.1	8040691	8041052	peak_17061	362	+	-0.0230962259249	1.0	60.6109510086	peak_12524|peak_13089	utr3	rna-XM_027468099.1	561	1492	1611	473	925	726	1466	1770	1364	1289	949	887
946af1db-2f2d-4e6b-9268-2987252dbdaf	NC_040046.1	176659917	176660125	peak_12639	209	+	-0.0230962259249	1.0	60.6109510086	peak_1084,peak_1088|peak_1165,peak_1166	NP_exon	946af1db-2f2d-4e6b-9268-2987252dbdaf.trans	667	1209	1266	659	819	669	397	545	306	334	208	217
CNN3	NC_040053.1	35035995	35036235	peak_2812	241	+	-0.0230962259249	1.0	60.6109510086	peak_9733|peak_10172	cds	rna-XM_027462349.1	2081	3855	3115	1661	2377	1567	4950	6607	5204	3658	3365	3521
LOC113843742	NC_040050.1	34444512	34445428	peak_7067	917	-	-0.0230962259249	1.0	60.6109510086	peak_7913|peak_8271	cds	rna-XM_027458057.1	4051	6833	5736	3779	4412	3255	2243	2407	2267	1728	1454	1590
LOC101803633	NC_040062.1	115733	116107	peak_12990	375	-	0.760143816313	0.504378236425	644.254512184	peak_13802|NA	cds	rna-XM_027470527.1	4	12	20	2	2	7	3	16	13	2	3	2
RBM12	NC_040066.1	6394466	6395546	peak_5954	1081	-	-0.0230962259249	1.0	60.6109510086	peak_15583,peak_15584|peak_16273,peak_16274	cds	rna-XM_027473014.1	1177	2550	1698	931	1408	838	2393	2866	2267	1824	1523	1420
CAVIN4	NC_040047.1	93201646	93202096	peak_8952	451	+	-0.0230962259249	1.0	60.6109510086	peak_3155|peak_3287	cds	rna-XM_005010613.4	4650	8731	6330	3541	4591	2827	1161	1408	1013	744	611	641
CCDC88C	NC_040050.1	21118763	21126488	peak_6804	7726	+	-0.0230962259249	1.0	60.6109510086	peak_7137|peak_7462,peak_7463	cds	rna-XM_027459250.1	726	1174	895	498	713	403	551	506	434	417	205	269
PRDM2	NC_040067.1	2496102	2496313	peak_16119	212	-	-0.0230962259249	1.0	60.6109510086	peak_15947|peak_16646	utr3	rna-XM_027443324.1	475	952	858	357	538	437	809	1009	909	578	521	488
MTMR11	NC_040071.1	649189	649543	peak_881	355	+	0.976983232949	1.0	60.6109510086	peak_16648|peak_17397	cds	rna-XM_027444504.1	276	561	444	316	151	195	403	436	396	347	235	332
WDR81	NC_040065.1	10823959	10824350	peak_4878	392	-	-0.0230962259249	1.0	60.6109510086	peak_15218|peak_15895	cds	rna-XM_027472104.1	352	856	505	229	361	283	804	921	900	491	364	549
LOC101799376	NC_040053.1	9666491	9667405	peak_2234	915	+	-0.976983232949	1.0	60.6109510086	NA|peak_9879	cds	rna-XM_027463085.1	4	41	28	4	15	19	29	26	23	23	19	16
ABCA2	NC_040063.1	266917	267348	peak_18569	432	-	-0.0230962259249	1.0	60.6109510086	peak_14043,peak_14042|peak_14680,peak_14679	utr3	rna-XM_027470872.1	527	940	756	332	415	315	624	809	602	393	336	314
PURG	NC_040049.1	16350607	16350668	peak_19645	62	+	1.02309622592	0.622022411019	249.822057759	peak_6012|NA	NP_exon	rna-XR_003496819.1	60	94	118	71	58	78	94	124	87	67	62	43
DISP1	NC_040048.1	2149508	2151361	peak_14258	1854	-	-0.0230962259249	1.0	60.6109510086	peak_5128|peak_5376	cds	rna-XM_013095727.2	113	185	125	83	119	74	268	390	301	177	238	201
RANBP1	NC_040061.1	4184053	4185172	peak_20642	1120	+	-0.0230962259249	1.0	60.6109510086	peak_13582,peak_13406|peak_14227,peak_14031	cds	rna-XM_027470249.1	2613	5073	4028	2047	2002	1627	4470	6772	6294	2807	2822	3289
SFXN2	NC_040051.1	13640534	13640683	peak_3068	150	-	0.0230167670511	1.0	60.6109510086	peak_8503|NA	utr5	rna-XM_027459934.1	45	144	88	83	68	64	87	145	118	112	99	84
CNOT8	NC_040059.1	8975552	8975642	peak_17085	91	+	0.0230962259249	1.0	60.6109510086	peak_12542|NA	utr3	rna-XM_027468501.1	92	143	121	87	76	81	164	209	203	129	147	123
KTN1	NC_040050.1	8378676	8395851	peak_6512	17176	+	-0.0230962259249	1.0	60.6109510086	peak_6983|peak_7292,peak_7293	cds	rna-XM_027457881.1	3619	7445	5709	2700	3781	2399	5403	6673	5177	3697	2790	2919
AMMECR1L	NC_040054.1	17346875	17349036	peak_14091	2162	-	-0.0230962259249	1.0	60.6109510086	peak_10518|peak_10979,peak_10980	cds	rna-XM_027463896.1	469	903	744	460	456	385	934	1263	951	788	741	680
F2RL2	NC_040075.1	23916731	23917211	peak_17687	481	+	0.976981975286	1.0	60.6109510086	peak_17637|peak_18430	utr3	rna-XM_005011601.2	104	205	208	65	85	68	147	217	141	125	82	109
NAB1	NC_040052.1	8234440	8234501	peak_5110	62	-	-0.0231744228972	1.0	60.6109510086	NA|peak_9557	utr3	rna-XM_027460939.1	27	59	86	56	48	51	88	166	105	81	64	70
VASH1	NC_040050.1	27507396	27507545	peak_6893	150	-	-1.02309622592	0.622022411019	249.822057759	NA|peak_8180	utr3	rna-XM_027458440.1	4563	11386	3366	3796	6022	1594	8029	10933	5745	4649	5531	3353
STX16	NC_040066.1	10728626	10729245	peak_6081	620	+	-0.0230962259249	1.0	60.6109510086	NA|peak_16066	cds	rna-XM_027472958.1	135	354	222	162	253	125	334	326	317	267	197	218
AFF1	NC_040049.1	45248331	45248511	peak_20057	181	+	-0.0230962259249	1.0	60.6109510086	peak_6180|peak_6444	utr3	rna-XM_027456242.1	642	773	624	474	468	361	569	794	691	439	425	424
VWA1	NC_040067.1	4513855	4514035	peak_16216	181	-	-0.0230962259249	1.0	60.6109510086	peak_15999|peak_16699	utr3	rna-XM_027443166.1	158	284	223	130	170	109	157	250	161	172	68	121
C11H15orf39	NC_040056.1	12455540	12455750	peak_372	211	-	0.0230949640235	1.0	60.6109510086	peak_11517|NA	cds	rna-XM_027466267.1	168	265	192	249	275	172	254	326	313	339	62	310
CPT2	NC_040053.1	10278474	10278535	peak_2248	62	-	0.0230167670511	1.0	60.6109510086	peak_9821|NA	cds	rna-XM_027462923.1	42	75	57	41	41	33	73	88	70	76	73	57
CDKN2AIP	NC_040049.1	20752729	20753266	peak_19732	538	-	-0.0230962259249	1.0	60.6109510086	peak_6509|peak_6780	utr3	rna-XM_027456303.1	708	1046	984	470	565	473	1176	1665	1311	612	618	712
FBF1	NC_040064.1	3446497	3449414	peak_1871	2918	+	-0.0230962259249	1.0	60.6109510086	peak_14319|peak_14984	cds	rna-XM_027471352.1	2495	4362	2964	1694	2051	1347	3860	3868	3223	2538	1707	1716
RNF217	NC_040048.1	63442351	63481350	peak_15332	39000	-	-0.0230962259249	1.0	60.6109510086	peak_5585|peak_5829,peak_5830,peak_5831	cds	rna-XM_027453577.1	1851	2653	2488	1311	1291	1017	967	1245	1122	563	574	548
TPRA1	NC_040058.1	20081786	20082475	peak_1627	690	+	-0.0230180247139	1.0	60.6109510086	peak_12177,peak_12178|peak_12728	utr3	rna-XM_013092328.3	635	1055	794	391	440	311	869	915	992	413	378	483
LOC101792171	NC_040046.1	83714353	83714414	peak_11073	62	-	0.0230962259249	1.0	60.6109510086	peak_1736|NA	utr3	rna-XM_013094535.3	8	23	11	6	11	7	5	21	16	10	5	11
LOC101790800	NC_040075.1	63727337	63727428	peak_18148	92	+	-0.0230949640235	1.0	60.6109510086	NA|peak_18670	cds	rna-XM_005031685.4	16	17	34	11	24	29	12	14	20	17	8	11
LOC101795745	NC_040055.1	4277843	4282221	peak_16463	4379	-	-0.0230962259249	1.0	60.6109510086	peak_10793|peak_11267	cds	rna-XM_005009013.4	867	1553	1241	781	917	636	877	1359	1001	781	701	651
GTF2A1	NC_040050.1	25296732	25304755	peak_6855	8024	+	-0.0230180247139	1.0	60.6109510086	peak_7156|peak_7489	cds	rna-XM_027458951.1	1964	3641	2995	1135	1551	988	3795	4288	3844	2257	1590	1683
278789ba-bdb0-44ce-a3f0-32cf099e625d	NC_040052.1	2966087	2966470	peak_5014	384	+	0.976903774075	1.0	60.6109510086	peak_8710,peak_8712|peak_9111,peak_9109	NP_exon	278789ba-bdb0-44ce-a3f0-32cf099e625d.trans	564	898	658	425	452	306	612	563	485	320	334	330
UBA5	NC_040047.1	44881539	44882133	peak_8508	595	+	0.976903774075	1.0	60.6109510086	peak_2952|NA	cds	rna-XM_027450183.1	237	276	370	184	167	144	395	549	301	331	268	189
CEP295	NC_040046.1	10267269	10268286	peak_10184	1018	+	-0.0230962259249	1.0	60.6109510086	peak_109|peak_112	cds	rna-XM_027465054.1	62	99	104	66	78	59	132	179	177	108	96	125
DLG2	NC_040046.1	7085704	7100435	peak_10164	14732	-	-0.0230949640235	1.0	60.6109510086	peak_1303|peak_1388	cds	rna-XM_027462397.1	115	235	206	152	224	180	233	268	179	257	169	207
ZNHIT2	NW_020866639.1	9674	11404	peak_3497	1731	+	0.561865012757	1.0	60.6109510086	peak_18531,peak_18532|peak_19340	utr3	rna-XM_027448632.1	855	1499	1090	449	456	380	1560	1801	1512	777	573	630
ATP2B1	NC_040046.1	154229759	154230344	peak_12289	586	-	-0.0230962259249	1.0	60.6109510086	peak_2315,peak_2314|peak_2441,peak_2440	utr3	rna-XM_027451775.1	910	1550	1493	646	806	732	1220	1666	1123	787	634	615
EMC2	NC_040047.1	138022700	138031001	peak_9509	8302	+	-0.0230974879642	1.0	60.6109510086	peak_3420|peak_3568	cds	rna-XM_027452605.1	2182	4050	3035	1193	1532	978	4313	4907	4288	2440	1499	1933
SS18	NC_040047.1	114788244	114788692	peak_9226	449	+	-0.0230962259249	1.0	60.6109510086	peak_3284|peak_3417	utr3	rna-XM_027452211.1	1340	2398	2060	1119	1530	902	2436	3481	3254	1985	1673	2078
LOC101804496	NC_040046.1	160513667	160513727	peak_12422	61	+	-0.0230962259249	1.0	60.6109510086	NA|peak_1077	cds	rna-XM_005012209.4	814	867	1410	746	531	850	294	507	311	215	319	212
SNX33	NC_040056.1	12822234	12822414	peak_411	181	+	-0.0230962259249	1.0	60.6109510086	peak_11147|peak_11630	utr3	rna-XM_005021349.4	88	164	187	91	120	121	154	170	254	147	104	108
DAGLA	NC_040050.1	34316734	34316975	peak_7063	242	+	-0.976981975286	1.0	60.6109510086	NA|peak_7578	utr3	rna-XM_027458983.1	119	113	117	55	56	42	170	190	213	108	126	110
TRMT12	NC_040055.1	14927146	14927446	peak_16766	301	+	-0.0231756891752	1.0	60.6109510086	peak_10730|peak_11207	cds	rna-XM_027465455.1	213	389	259	139	164	119	482	563	494	234	192	188
CA4	NC_040065.1	7555129	7555249	peak_4678	121	+	0.976983232949	1.0	60.6109510086	peak_14793|NA	utr3	rna-XM_005014383.4	4	8	3	4	3	1	0	11	1	7	3	2
HUNK	NC_040046.1	94853591	94854429	peak_11211	839	-	-1.02309622592	0.622022411019	249.822057759	peak_1800,peak_1801|peak_1913	utr3	rna-XM_027449202.1	329	734	520	268	367	286	967	1268	1303	501	570	738
UBQLN4	NC_040071.1	288672	288912	peak_844	241	-	-0.0230167670511	1.0	60.6109510086	peak_16704|peak_17458	cds	rna-XM_027444488.1	1138	2475	2050	1275	1819	1158	2134	2546	2262	1730	1805	1665
ZFAND3	NC_040048.1	33353233	33353502	peak_14903	270	+	-1.02309622592	0.622022411019	249.822057759	peak_4621|peak_4841	utr3	rna-XM_021278865.1	897	1604	1271	805	1027	730	1278	1706	1301	839	787	800
NR1D2	NC_040047.1	39742196	39742617	peak_8424	422	+	-1.02317568918	0.622012251195	633.83074332	peak_2924|peak_3040	cds	rna-XM_027451074.1	158	342	245	131	191	140	388	437	425	212	168	171
RPA2	NC_040069.1	5994733	5994970	peak_4165	238	-	-0.0230962259249	1.0	60.6109510086	peak_16392|peak_17142	utr3	rna-XM_027443732.1	377	784	606	287	434	307	927	1181	785	595	576	564
RNF216	NC_040060.1	3813538	3815341	peak_13227	1804	+	-0.0230962259249	1.0	60.6109510086	peak_12909,peak_12910|peak_13503,peak_13504	cds	rna-XM_013100160.3	611	1135	834	470	619	455	1119	1484	1327	800	840	848
PHTF2	NC_040046.1	190560308	190560369	peak_12804	62	+	-0.0231744228972	1.0	60.6109510086	NA|peak_1231	cds	rna-XM_021268263.2	182	321	244	240	290	240	120	171	148	98	93	92
TENT5C	NC_040046.1	120296369	120296430	peak_11538	62	+	0.976983232949	1.0	60.6109510086	peak_625|NA	utr3	rna-XM_027449699.1	13	31	18	6	10	14	13	4	7	13	5	1
LOC101796516	NC_040054.1	21823886	21823977	peak_14147	92	+	-1.02325388615	0.622002253928	736.904754352	NA|peak_10732	utr3	rna-XM_027464430.1	8	10	9	17	8	4	12	19	33	14	2	12
148cbe0c-eb41-4555-897c-d07ea32031c7	NC_040075.1	70804268	70804508	peak_18215	241	-	0.562022681457	1.0	60.6109510086	peak_18341,peak_18342|peak_19163,peak_19164	NP_exon	148cbe0c-eb41-4555-897c-d07ea32031c7.trans	159	238	176	61	61	60	182	166	175	113	60	71
MOB3B	NC_040075.1	65810880	65810941	peak_18156	62	-	-1.02309622592	0.622022411019	249.822057759	NA|peak_19131	cds	rna-XM_027446460.1	2	3	6	3	3	1	9	7	5	3	5	4
SSBP1	NC_040046.1	142911547	142913892	peak_11988	2346	-	-0.0230167670511	1.0	60.6109510086	peak_2199|peak_2324	cds	rna-XM_027445922.1	830	1828	1416	873	1275	829	1878	2354	2005	1564	1358	1581
FEN1	NC_040050.1	34402154	34402776	peak_7066	623	+	-0.0230962259249	1.0	60.6109510086	peak_7254,peak_7255|peak_7580	utr3	rna-XM_027459010.1	846	1652	1270	741	1038	708	2569	3459	2502	1812	1908	1860
ALAS1	NC_040058.1	18786906	18787933	peak_1570	1028	-	-0.0230962259249	1.0	60.6109510086	NA|peak_12918	cds	rna-XM_005026493.3	149	293	308	163	201	167	346	363	329	277	214	234
BAK1	NC_040072.1	5589110	5595740	peak_9991	6631	+	-0.0230167670511	1.0	60.6109510086	peak_16899|peak_17647	cds	rna-XM_005026830.4	515	922	833	473	748	505	1089	1367	723	906	946	490
TRPC4	NC_040046.1	24936126	24936485	peak_10400	360	-	-1.02317568918	0.622012251195	633.83074332	NA|peak_1514	cds	rna-XM_005018338.4	83	54	50	35	44	47	39	93	43	35	21	16
NFATC2	NC_040066.1	8041429	8045937	peak_6037	4509	-	-1.02309622592	0.622022411019	249.822057759	NA|peak_16315	utr5	rna-XM_013105618.3	10	12	18	11	10	9	34	41	31	22	21	14
SH3RF3	NC_040046.1	61844631	61844692	peak_10728	62	-	-0.0230962259249	1.0	60.6109510086	NA|peak_1671	utr3	rna-XM_027444954.1	40	114	80	28	71	53	100	161	123	64	105	79
EZR	NC_040048.1	54857134	54864820	peak_15217	7687	-	-0.0230180247139	1.0	60.6109510086	peak_5546|peak_5785	utr3	rna-XM_027454414.1	1788	4742	3493	1150	1958	1254	4161	5513	5801	2511	1922	2570
NCBP3	NC_040065.1	11083199	11084253	peak_4900	1055	+	-0.0230962259249	1.0	60.6109510086	peak_14899|peak_15574	cds	rna-XM_027472039.1	404	750	557	347	456	256	569	792	789	469	401	498
MANBA	NC_040049.1	6382435	6382795	peak_19483	361	+	-0.0230180247139	1.0	60.6109510086	peak_5921|peak_6181	utr3	rna-XM_027455994.1	459	669	823	213	275	272	437	408	402	181	153	234
HRH1	NC_040058.1	14443978	14444429	peak_1439	452	-	-0.43821445487	0.724404069178	246.450021009	peak_12280,peak_12281|peak_12841	cds	rna-XM_027467685.1	24	60	56	17	23	11	110	86	81	35	15	24
LOC101799876	NC_040050.1	13336276	13336396	peak_6646	121	-	-0.0230949640235	1.0	60.6109510086	NA|peak_8074	cds	rna-XM_027457928.1	66	85	87	87	92	67	185	173	153	136	105	126
TTC30B	NC_040052.1	20527560	20527978	peak_5432	419	+	-0.0230180247139	1.0	60.6109510086	peak_8957|peak_9343	cds	rna-XM_027461514.1	234	714	617	142	299	233	551	749	578	345	248	264
ABCC5	NC_040054.1	9359790	9359911	peak_13811	122	+	0.0230167670511	1.0	60.6109510086	peak_10140|NA	utr3	rna-XM_027464179.1	185	219	229	149	197	94	102	105	103	95	91	74
ERG28	NC_040050.1	28117029	28117324	peak_6906	296	+	-0.0230962259249	1.0	60.6109510086	peak_7191|peak_7515	utr3	rna-XM_027458499.1	553	966	604	423	526	426	826	944	916	584	638	670
SMIM18	NC_040049.1	16280851	16281002	peak_19636	152	+	-0.0230949640235	1.0	60.6109510086	NA|peak_6262	cds	rna-XM_005025127.4	174	286	225	212	301	183	314	423	356	350	357	417
UBALD1	NC_040060.1	11479195	11480011	peak_13458	817	+	0.391938749137	1.0	60.6109510086	peak_13034|peak_13619	cds	rna-XM_027469073.1	2789	4776	4314	1262	937	1005	2565	2912	2653	1185	566	783
STAB1	NC_040058.1	16964389	16965192	peak_1515	804	+	0.0230167670511	1.0	60.6109510086	peak_12116|NA	cds	rna-XM_027467286.1	353	528	467	357	306	300	233	278	289	182	231	204
E2F2	NC_040069.1	3361066	3361189	peak_4105	124	-	-0.976903774075	1.0	60.6109510086	NA|peak_17115,peak_17117	utr3	rna-XM_027443966.1	290	444	407	267	85	200	133	251	236	134	141	119
PDE8A	NC_040056.1	10287021	10287082	peak_298	62	-	-1.02309622592	0.622022411019	249.822057759	NA|peak_11981	utr3	rna-XM_027466408.1	34	62	52	16	53	22	45	47	40	24	21	21
VASH2	NC_040048.1	21619856	21620097	peak_14706	242	+	0.976903774075	1.0	60.6109510086	peak_4518|peak_4733	utr3	rna-XM_027453710.1	1570	2685	1668	1116	1379	717	1445	1851	1393	957	892	897
PPP1R26	NC_040063.1	5445332	5445453	peak_18735	122	-	0.976903774075	1.0	60.6109510086	peak_14113|NA	utr3	rna-XM_027470804.1	32	83	34	27	14	33	30	68	71	17	35	48
KIAA0355	NC_040057.1	12537757	12541242	peak_19248	3486	+	-0.0230962259249	1.0	60.6109510086	peak_11793,peak_11794|peak_12324	cds	rna-XM_027466947.1	649	1361	1199	485	676	493	753	972	930	495	449	489
EYA2	NC_040066.1	1494950	1498588	peak_5820	3639	-	-0.0230962259249	1.0	60.6109510086	peak_15519|peak_16202	cds	rna-XM_027442857.1	1174	2424	1661	1039	1375	795	1525	2024	1792	1147	1058	1133
TMEM200C	NC_040047.1	105407998	105408419	peak_9114	422	-	-0.0230974879642	1.0	60.6109510086	peak_4053|peak_4240	utr3	rna-XM_027452017.1	113	354	182	68	148	43	600	773	863	299	262	376
LOC101799353	NC_040072.1	3124712	3124839	peak_9849	128	-	0.561865012757	1.0	60.6109510086	peak_16957|NA	utr5	rna-XM_027444983.1	129	468	471	115	277	7	130	169	377	86	22	166
KIAA0895	NC_040047.1	61860909	61866227	peak_8731	5319	-	-0.0230167670511	1.0	60.6109510086	peak_3864|peak_4036	NP_exon	rna-XR_003495384.1	467	1046	855	390	584	394	377	590	415	317	365	325
TET1	NC_040051.1	33321946	33324028	peak_3461	2083	-	-0.0230962259249	1.0	60.6109510086	peak_8681|peak_9079	cds	rna-XM_027460750.1	749	1541	1253	594	771	474	1050	1556	1255	690	597	779
TBC1D31	NC_040047.1	144250693	144252642	peak_9564	1950	+	0.976903774075	1.0	60.6109510086	peak_3434|peak_3586	NP_exon	rna-XR_003495829.1	333	619	624	269	301	229	570	806	535	429	353	332
TRPC4AP	NC_040066.1	3280984	3282157	peak_5874	1174	+	-1.02309622592	0.622022411019	249.822057759	peak_15296|peak_15982	utr3	rna-XM_027442967.1	168	369	271	150	182	137	359	390	333	271	138	171
SPATA2	NC_040066.1	304493	305032	peak_5786	540	+	-0.0230180247139	1.0	60.6109510086	peak_15265|peak_15944,peak_15945	cds	rna-XM_027472947.1	200	416	234	134	160	81	255	293	305	129	130	145
SCYL3	NC_040053.1	26531470	26533501	peak_2625	2032	-	-0.0230180247139	1.0	60.6109510086	peak_9977|peak_10417	utr3	rna-XM_027463586.1	1013	1857	1620	660	762	649	1492	1899	1691	780	708	808
SLA	NC_040047.1	148217006	148217067	peak_9607	62	-	-3.11175147574	0.000364929978506	3.08080539154	NA|peak_4461	cds	rna-XM_005010564.4	2	5	2	1	4	0	6	6	62	1	2	2
AXIN1	NC_040060.1	11269133	11271144	peak_13446	2012	+	-0.0230962259249	1.0	60.6109510086	peak_13029|peak_13611	utr3	rna-XM_027468901.1	306	641	621	260	355	234	672	878	769	528	350	401
MEX3A	NC_040071.1	309643	310061	peak_846	419	-	-0.0230962259249	1.0	60.6109510086	peak_16706|peak_17460	cds	rna-XM_027444518.1	1061	2001	1698	938	1183	866	2352	2675	2299	1536	1728	1563
ZNF217	NC_040066.1	8799424	8799604	peak_6049	181	-	-0.0230962259249	1.0	60.6109510086	NA|peak_16321	cds	rna-XM_021276662.2	124	228	131	99	145	42	201	268	195	126	139	123
FA2H	NC_040056.1	17560094	17560155	peak_556	62	+	-0.0230962259249	1.0	60.6109510086	NA|peak_11707	cds	rna-XM_027466374.1	44	123	63	57	52	46	149	252	169	132	85	130
WDR89	NC_040050.1	11412741	11413402	peak_6581	662	-	-0.0230180247139	1.0	60.6109510086	peak_7699,peak_7700|peak_8056	cds	rna-XM_027458717.1	130	275	195	84	111	76	213	218	242	136	86	98
HOXC4	NC_040073.1	6493520	6493879	peak_3857	360	+	-0.0230962259249	1.0	60.6109510086	peak_17213|peak_17974	utr3	rna-XM_021276698.2	43	108	96	46	78	61	326	267	243	162	182	159
ZNF438	NC_040047.1	15436868	15439376	peak_8091	2509	+	-0.0230180247139	1.0	60.6109510086	peak_2790|peak_2914	utr3	rna-XM_027450552.1	863	1621	1432	536	670	428	1268	1219	1118	621	518	513
OSBP2	NC_040061.1	10053687	10053808	peak_20906	122	+	-0.0230962259249	1.0	60.6109510086	NA|peak_14141	utr3	rna-XM_027470265.1	408	1097	521	471	689	288	226	430	296	184	169	236
HIBADH	NC_040047.1	35233785	35288526	peak_8365	54742	-	0.0230167670511	1.0	60.6109510086	peak_3714|NA	cds	rna-XM_027450977.1	1280	2059	1742	1249	1419	931	1242	1829	1806	1385	1119	1292
RTEL1	NC_040066.1	14484993	14485590	peak_6187	598	-	-1.0231744229	0.622012413086	551.406443858	NA|peak_16384	cds	rna-XM_027473071.1	55	153	76	76	86	74	163	336	177	113	119	121
HTR1A	NC_040075.1	20465853	20466095	peak_17621	243	-	0.977138390426	0.687534042138	238.424222522	peak_18060,peak_18059|NA	utr3	rna-XM_027446679.1	10	22	20	5	0	7	4	4	10	6	2	2
GLYR1	NC_040060.1	15709285	15709466	peak_13581	182	-	-0.0230167670511	1.0	60.6109510086	peak_13342|peak_13958	utr3	rna-XM_027468923.1	811	1517	1478	954	872	808	1495	1948	1783	1422	1114	1500
AKAP1	NC_040065.1	6523104	6523315	peak_4634	212	+	-0.0230962259249	1.0	60.6109510086	peak_14777|peak_15449	cds	rna-XM_027471954.1	638	1407	1019	632	800	514	592	666	665	398	381	503
ELFN2	NC_040046.1	149010367	149010728	peak_12111	362	-	-0.0231769555916	1.0	60.6109510086	peak_2253|peak_2376	utr3	rna-XM_027450277.1	70	127	86	13	36	47	282	338	360	146	83	69
KIF5C	NC_040050.1	2194319	2200215	peak_6341	5897	+	-0.0230962259249	1.0	60.6109510086	peak_6918|peak_7213	cds	rna-XM_027457889.1	154	177	299	135	71	131	306	375	293	191	182	150
RNF152	NC_040047.1	77289701	77290223	peak_8837	523	-	-0.0230962259249	1.0	60.6109510086	peak_3919,peak_3921|peak_4095,peak_4096	utr3	rna-XM_027451666.1	425	874	652	354	346	265	686	917	727	445	405	394
PHLDB1	NC_040070.1	5532973	5539224	peak_18474	6252	-	-0.0230962259249	1.0	60.6109510086	peak_16582|peak_17331	cds	rna-XM_027444108.1	5091	9295	7278	3564	4159	2946	6932	7451	7130	3821	3059	3486
LOC113845398	NC_040062.1	805238	805417	peak_13018	180	+	-0.0230962259249	1.0	60.6109510086	NA|peak_14428	utr3	rna-XM_027470519.1	80	145	39	70	50	58	55	172	195	59	59	130
ARIH1	NC_040056.1	11691856	11692334	peak_356	479	+	-0.0230962259249	1.0	60.6109510086	peak_11125|peak_11604	cds	rna-XM_027466212.1	4921	8989	7175	3665	3289	3194	8830	10857	9901	5466	4682	5063
LACTB	NC_040056.1	14520202	14520713	peak_471	512	-	-0.0230962259249	1.0	60.6109510086	peak_11558|peak_12076	utr3	rna-XM_021277803.2	522	944	828	307	556	431	1051	1423	1243	676	567	538
CCDC15	NC_040070.1	153954	157389	peak_18304	3436	+	-0.0230962259249	1.0	60.6109510086	peak_16409|peak_17162	cds	rna-XM_027444234.1	1408	2606	1781	1303	1599	1042	1996	2614	2434	1613	1657	1669
ZNF703	NC_040068.1	1550685	1550894	peak_1021	210	+	-0.976903774075	1.0	60.6109510086	NA|peak_16801	utr3	rna-XM_027443495.1	69	135	98	43	49	71	88	144	123	67	75	98
HIBADH	NC_040047.1	35303869	35303960	peak_8366	92	-	-0.0231744228972	1.0	60.6109510086	NA|peak_3882	cds	rna-XM_027450977.1	225	400	337	297	276	209	303	335	338	224	205	254
TMEM121	NC_040053.1	27870140	27870351	peak_2689	212	+	-0.562022681457	1.0	60.6109510086	NA|peak_10117	cds	rna-XM_027463068.1	37	221	85	30	56	21	94	76	101	65	37	38
FANCD2	NC_040058.1	16256617	16257543	peak_1502	927	-	-1.02309622592	0.622022411019	249.822057759	peak_12323|peak_12887	utr3	rna-XM_027467990.1	451	684	655	417	449	391	719	936	905	395	408	530
TRIB2	NC_040048.1	104015550	104029700	peak_15772	14151	+	-0.0230962259249	1.0	60.6109510086	peak_5019|peak_5259	utr3	rna-XM_027455248.1	1086	2443	1888	802	1084	700	4507	4906	4687	2341	1963	2256
SMIM5	NC_040064.1	3654922	3655163	peak_1889	242	-	-0.0231756891752	1.0	60.6109510086	peak_14491|peak_15156	NP_exon	rna-XR_003501102.1	190	651	349	129	353	98	127	163	208	65	61	91
CCDC68	NC_040075.1	1100495	1100556	peak_17377	62	+	-1.02309622592	0.622022411019	249.822057759	NA|peak_18279	utr3	rna-XM_027446963.1	33	29	27	6	39	14	56	75	60	46	13	48
TTN	NC_040052.1	19974969	19976847	peak_5362	1879	+	-0.0230962259249	1.0	60.6109510086	peak_8888,peak_8889|peak_9287	cds	rna-XM_027461598.1	2405	4376	3704	1734	2261	1687	925	1231	1059	563	510	628
SYNGR1	NC_040046.1	149637906	149638206	peak_12188	301	+	-0.0230962259249	1.0	60.6109510086	peak_875|peak_939	utr3	rna-XM_027450924.1	132	198	142	80	96	57	305	439	262	171	228	173
GLS	NC_040052.1	8149653	8149775	peak_5109	123	-	0.0230167670511	1.0	60.6109510086	peak_9165,peak_9164|NA	utr3	rna-XM_027460936.1	283	438	453	229	285	250	371	465	535	317	318	499
LOC101795178	NC_040056.1	1974422	1974598	peak_105	177	-	-0.0230962259249	1.0	60.6109510086	NA|peak_11889	utr3	rna-XM_005031474.2	158	259	202	78	145	72	548	580	817	283	274	508
MGAT3	NC_040046.1	149685711	149686162	peak_12192	452	+	-0.0230180247139	1.0	60.6109510086	peak_878|peak_942	utr3	rna-XM_027450898.1	348	667	610	189	265	232	526	491	500	261	227	228
RORA	NC_040056.1	15501345	15502999	peak_482	1655	+	-0.0231756891752	1.0	60.6109510086	peak_11175|peak_11666	utr3	rna-XM_027466154.1	89	227	161	76	102	66	159	191	156	99	48	65
MKS1	NC_040074.1	4393461	4394638	peak_1192	1178	+	-0.0230167670511	1.0	60.6109510086	NA|peak_18219	cds	rna-XM_027445951.1	123	188	167	121	107	101	192	245	204	185	114	176
RABL3	NC_040046.1	119690070	119690280	peak_11506	211	-	-0.0230962259249	1.0	60.6109510086	peak_1957|peak_2062	utr3	rna-XM_027449659.1	117	218	233	106	143	104	133	190	293	116	66	177
CALM1	NC_040050.1	21555134	21555285	peak_6811	152	-	-0.0230962259249	1.0	60.6109510086	peak_7793|peak_8150	utr3	rna-XM_027457858.1	379	742	586	356	463	300	839	1010	966	671	643	655
DMAP1	NC_040053.1	14989452	14989663	peak_2363	212	-	0.0230962259249	1.0	60.6109510086	peak_9867|NA	utr3	rna-XM_027462999.1	343	481	393	317	275	223	477	972	815	481	463	592
PTPN5	NC_040050.1	33605411	33605848	peak_7030	438	+	0.977060180736	0.687534448796	236.813823395	peak_7235|NA	utr5	rna-XM_027459295.1	26	45	63	15	4	16	53	39	86	32	23	42
SLC16A9	NC_040053.1	1368683	1368892	peak_2098	210	-	0.976903774075	1.0	60.6109510086	peak_9757|NA	cds	rna-XM_013095819.3	85	176	113	58	77	57	81	161	123	79	67	75
TNPO3	NC_040046.1	202056878	202057118	peak_12944	241	+	-0.0230962259249	1.0	60.6109510086	peak_1216,peak_1219|peak_1295,peak_1297	utr3	rna-XM_027461847.1	603	968	1089	519	611	703	1066	1151	1158	860	709	768
INIP	NC_040075.1	68536915	68543837	peak_18194	6923	-	-0.0230167670511	1.0	60.6109510086	peak_18325|peak_19149	cds	rna-XM_027446578.1	339	619	575	263	407	309	670	851	715	606	469	545
LOC113840206	NC_040075.1	34438600	34438776	peak_17829	177	-	-0.0230962259249	1.0	60.6109510086	peak_18143|peak_18962	cds	rna-XM_027446725.1	70	170	118	88	77	75	202	217	162	97	142	129
ADGRG6	NC_040048.1	55672149	55672269	peak_15237	121	-	-1.17516906396	0.0413081858242	152.191954572	NA|peak_5794,peak_5796	utr3	rna-XM_027454428.1	11	33	25	35	30	17	102	117	117	86	52	54
CREBRF	NC_040059.1	11971746	11971807	peak_17169	62	-	0.976983232949	1.0	60.6109510086	peak_12779|NA	utr5	rna-XM_027468288.1	73	81	82	27	59	36	36	75	51	59	47	43
KLC1	NC_040050.1	14490335	14491664	peak_6661	1330	-	-0.0230962259249	1.0	60.6109510086	peak_7728|peak_8085	cds	rna-XM_021278921.2	413	695	576	331	466	280	374	488	440	335	256	336
ARHGAP21	NC_040047.1	17859809	17860455	peak_8140	647	+	-0.0230949640235	1.0	60.6109510086	NA|peak_2929	cds	rna-XM_027450627.1	151	220	296	210	256	174	212	288	185	234	170	144
WTIP	NC_040057.1	12320921	12321012	peak_19241	92	+	-1.02309622592	0.622022411019	249.822057759	NA|peak_12319	cds	rna-XM_027466950.1	32	34	36	33	26	23	61	64	49	36	36	21
AFAP1L1	NC_040055.1	845520	845790	peak_16386	271	-	-0.0230962259249	1.0	60.6109510086	peak_10764|peak_11242	NP_exon	rna-XR_003499407.1	2549	4435	3692	2116	2618	1963	1392	1663	1311	1096	864	855
THSD7A	NC_040047.1	28334953	28335134	peak_8282	182	-	-2.02333462881	0.215032562089	515.257436663	NA|peak_3825	cds	rna-XM_027450865.1	4	4	3	0	5	3	14	29	42	5	8	7
ZC3H6	NC_040048.1	5039309	5047659	peak_14329	8351	-	-0.0230962259249	1.0	60.6109510086	peak_5168|peak_5420	cds	rna-XM_005018882.4	1037	1741	1725	833	1089	814	1573	2441	1882	1354	1264	1151
ARHGAP31	NC_040046.1	118749924	118750164	peak_11469	241	-	-1.02309622592	0.622022411019	249.822057759	peak_1937|peak_2043	cds	rna-XM_027449625.1	2651	3258	2151	2206	1810	1274	1685	1572	1227	1108	780	695
KLHL34	NC_040046.1	89763214	89763334	peak_11121	121	+	-2.34542039705	0.122023221363	361.7476361	NA|peak_504	cds	rna-XM_005010845.4	5	13	6	8	8	8	8	10	12	1	5	0
PTPRO	NC_040046.1	137213428	137213518	peak_11858	91	-	-1.02309622592	0.622022411019	249.822057759	NA|peak_2244	utr3	rna-XM_027461872.1	1	8	5	2	4	2	44	48	43	29	8	23
SMIM5	NC_040064.1	3651485	3651606	peak_1887	122	-	-0.0230962259249	1.0	60.6109510086	NA|peak_15154	NP_exon	rna-XR_003501103.1	89	215	127	113	136	92	48	76	66	23	51	48
KIF11	NC_040051.1	16430740	16431972	peak_3156	1233	+	-0.0230167670511	1.0	60.6109510086	peak_8269|peak_8677	cds	rna-XM_027460690.1	623	1077	923	581	817	527	1117	1514	1225	1105	880	845
EXPH5	NC_040046.1	16368970	16369150	peak_10258	181	-	-0.608139456313	0.685021649249	256.158615462	NA|peak_1432	cds	rna-XM_027468525.1	6	20	12	1	7	8	91	82	101	38	20	26
NUSAP1	NC_040050.1	37383804	37386743	peak_7220	2940	+	-0.0230962259249	1.0	60.6109510086	peak_7335|peak_7669	cds	rna-XM_027458108.1	1264	2345	1848	957	1391	950	2366	3334	2196	2046	1631	1432
TCF4	NC_040075.1	888775	888956	peak_17372	182	+	-0.0230167670511	1.0	60.6109510086	peak_17492|peak_18274	cds	rna-XM_027446425.1	135	229	192	150	142	142	209	313	228	205	210	203
CNTLN	NC_040075.1	32910267	32931163	peak_17809	20897	+	-0.0230949640235	1.0	60.6109510086	NA|peak_18504	cds	rna-XM_027446717.1	111	226	114	117	201	108	171	199	172	199	121	109
FAM166A	NC_040063.1	2004381	2006403	peak_18650	2023	+	0.0230167670511	1.0	60.6109510086	peak_13862|NA	cds	rna-XM_021277545.2	34	15	18	22	21	6	8	27	29	13	22	19
CDC16	NC_040046.1	61711769	61711919	peak_10718	151	+	-0.0230962259249	1.0	60.6109510086	NA|peak_326	cds	rna-XM_027444728.1	248	245	226	154	195	117	283	478	350	239	268	184
DNAJB6	NC_040047.1	8984165	8986874	peak_8017	2710	+	0.0230167670511	1.0	60.6109510086	peak_2745|NA	cds	rna-XM_027450442.1	769	1169	1053	697	885	639	1645	1925	1513	1669	1206	1196
AP2A2	NC_040050.1	50815918	50831208	peak_7516	15291	+	-0.0230962259249	1.0	60.6109510086	peak_7476|peak_7815	cds	rna-XM_027459677.1	826	1525	1239	823	935	576	1547	1745	1685	1226	1075	1126
PRDM10	NC_040070.1	1855649	1855860	peak_18346	212	+	-0.0231744228972	1.0	60.6109510086	peak_16426|peak_17177	utr5	rna-XM_027444389.1	97	154	163	124	137	100	111	167	207	81	106	120
FAM204A	NC_040051.1	6604650	6605694	peak_2957	1045	+	0.0230167670511	1.0	60.6109510086	peak_8196|NA	cds	rna-XM_005021117.3	388	629	567	375	479	279	512	788	596	558	470	446
HPSE2	NC_040051.1	14719455	14719843	peak_3117	389	-	-1.02317568918	0.622012251195	633.83074332	peak_8529|peak_8932	utr3	rna-XM_027460733.1	47	120	78	48	49	51	269	288	304	93	180	101
NCOA6	NC_040066.1	6987080	6987231	peak_5994	152	-	-0.0230167670511	1.0	60.6109510086	NA|peak_16287	cds	rna-XM_005018011.4	142	264	207	135	187	122	199	293	191	173	154	171
HPS6	NC_040051.1	14489864	14490133	peak_3101	270	+	0.0230962259249	1.0	60.6109510086	peak_8254|NA	cds	rna-XM_027460559.1	116	227	146	147	122	77	350	270	247	201	194	143
BTG2	NC_040072.1	3718134	3718403	peak_9877	270	+	-0.0230962259249	1.0	60.6109510086	peak_16853|peak_17599	utr3	rna-XM_027445174.1	964	1839	1351	912	939	723	690	844	1195	556	409	794
BET1L	NC_040050.1	35841682	35842058	peak_7154	377	+	-0.0230962259249	1.0	60.6109510086	peak_7295|peak_7626	cds	rna-XM_005030196.4	331	665	504	195	357	204	672	874	834	449	411	507
SHC2	NC_040065.1	5087130	5087872	peak_4567	743	+	0.976983232949	1.0	60.6109510086	peak_14736|peak_15411	cds	rna-XM_027472545.1	158	308	251	98	148	143	472	548	473	437	279	365
SDK1	NC_040060.1	4251211	4251602	peak_13255	392	-	-0.0230962259249	1.0	60.6109510086	peak_13189|peak_13802	utr3	rna-XM_027469547.1	217	364	421	195	165	120	780	808	927	344	343	463
ZRANB1	NC_040051.1	3714288	3722880	peak_2904	8593	-	-1.02309622592	0.622022411019	249.822057759	peak_8430|peak_8832	cds	rna-XM_013104748.3	1603	2867	2183	1235	1615	1035	2609	3196	2681	1703	1552	1466
SFXN5	NC_040049.1	74787896	74787987	peak_20532	92	+	0.976983232949	1.0	60.6109510086	peak_6354|NA	utr3	rna-XM_027455857.1	28	68	55	24	21	29	43	49	65	37	49	74
C13H3orf18	NC_040058.1	18048537	18051027	peak_1542	2491	-	-0.0230949640235	1.0	60.6109510086	NA|peak_12908	cds	rna-XM_027467665.1	79	147	87	109	115	92	126	211	216	119	142	149
CBX7	NC_040046.1	149545012	149545193	peak_12183	182	-	0.0230167670511	1.0	60.6109510086	peak_2276|NA	utr3	rna-XM_005015998.4	182	345	268	188	124	214	115	103	185	69	69	170
LMBR1	NC_040047.1	8720933	8721174	peak_8008	242	-	-0.0230962259249	1.0	60.6109510086	NA|peak_3713	utr3	rna-XM_021276658.2	110	251	187	102	125	129	277	290	259	170	182	140
SLC39A6	NC_040047.1	93025068	93026058	peak_8948	991	-	0.976903774075	1.0	60.6109510086	peak_3975|peak_4153	utr5	rna-XM_013107247.3	303	687	519	261	399	193	784	1059	895	611	452	533
COMMD1	NC_040048.1	15284925	15285075	peak_14516	151	-	-0.0230962259249	1.0	60.6109510086	NA|peak_5502	utr3	rna-XM_027453447.1	322	363	357	306	181	236	478	425	467	303	237	302
POLR1A	NC_040049.1	70341922	70344616	peak_20456	2695	-	-0.0230974879642	1.0	60.6109510086	peak_6862|peak_7140	cds	rna-XM_027455734.1	1207	2095	1716	570	824	536	2057	2537	2527	1114	830	1060
PHF20	NC_040066.1	6594043	6599999	peak_5964	5957	+	-1.02309622592	0.622022411019	249.822057759	peak_15338,peak_15339|peak_16021	utr3	rna-XM_027472714.1	987	1740	1470	795	1084	699	1759	2202	1941	1231	938	1075
SKIDA1	NC_040047.1	19078975	19079156	peak_8160	182	+	-0.0230180247139	1.0	60.6109510086	peak_2809|peak_2934	cds	rna-XM_027452886.1	31	72	81	20	37	29	61	63	67	25	41	21
MKNK2	NC_040065.1	704579	704938	peak_4274	360	+	-0.0230962259249	1.0	60.6109510086	peak_14585|peak_15259	cds	rna-XM_027472044.1	442	769	629	320	459	324	711	693	942	519	426	610
PBRM1	NC_040058.1	17054675	17057777	peak_1519	3103	-	-1.02309622592	0.622022411019	249.822057759	peak_12332|peak_12895	utr5	rna-XM_027467296.1	803	1674	1197	713	875	666	1644	1711	1756	1170	761	936
LOC106019744	NC_040059.1	13697695	13697786	peak_17225	92	+	-1.6081381899	0.371038958738	572.626096768	NA|peak_13166	NP_exon	gene-LOC106019744.trans	24	23	13	34	5	3	32	46	71	13	28	15
bae97a29-a070-43be-af1d-ba06c393c8ca	NC_040056.1	20232882	20233102	peak_719	221	-	-0.0230962259249	1.0	60.6109510086	peak_11662,peak_11664|peak_12181,peak_12179	NP_exon	bae97a29-a070-43be-af1d-ba06c393c8ca.trans	287	425	377	263	259	215	288	250	196	155	191	127
B4GALNT4	NC_040050.1	35751361	35752264	peak_7148	904	-	-0.0230962259249	1.0	60.6109510086	NA|peak_8300	cds	rna-XM_027458364.1	208	361	297	157	224	273	783	1072	807	655	605	633
KIAA1755	NC_040066.1	15348847	15349236	peak_6262	390	+	-0.0230962259249	1.0	60.6109510086	peak_15478|peak_16159	cds	rna-XM_027472730.1	779	1427	1179	669	865	621	883	774	529	546	465	352
NRXN3	NC_040050.1	25716998	25717179	peak_6867	182	-	-0.0230180247139	1.0	60.6109510086	NA|peak_8173	utr3	rna-XM_027458756.1	33	82	90	19	43	27	59	88	66	43	22	45
YLPM1	NC_040050.1	28450926	28452178	peak_6935	1253	-	-0.976903774075	1.0	60.6109510086	NA|peak_8210	cds	rna-XM_027457995.1	164	313	242	81	167	95	244	307	230	146	164	162
LEF1	NC_040049.1	4806708	4820699	peak_19442	13992	+	-0.0230962259249	1.0	60.6109510086	peak_5900|peak_6155	utr3	rna-XM_027456618.1	1182	2873	2572	1181	2004	1389	5039	6287	4280	3872	3229	2806
LOC101796539	NC_040064.1	641193	641254	peak_1761	62	+	-1.56200917221	0.00705438318582	36.5557425979	NA|peak_14919	utr3	rna-XM_027471618.1	8	9	9	2	6	4	7	7	5	3	2	20
RAD54L2	NC_040058.1	16129975	16141563	peak_1500	11589	-	-0.0230962259249	1.0	60.6109510086	peak_12321|peak_12885	cds	rna-XM_005023856.4	531	969	738	398	454	430	864	1093	1018	759	651	721
NOL8	NC_040058.1	15469778	15469899	peak_1452	122	-	-0.0230167670511	1.0	60.6109510086	peak_12289|peak_12853	cds	rna-XM_027467857.1	41	122	73	44	57	42	82	108	101	89	46	82
MEIS2	NC_040050.1	44797368	44798298	peak_7446	931	+	-1.02309622592	0.622022411019	249.822057759	peak_7434,peak_7435,peak_7436|peak_7777	utr3	rna-XM_027459059.1	285	585	547	252	354	222	2121	2680	2141	1356	1290	1132
MYH9	NC_040046.1	148540442	148554765	peak_12095	14324	-	-0.0230962259249	1.0	60.6109510086	peak_2245,peak_2246|peak_2367	cds	rna-XM_027450088.1	53837	90316	89161	38461	44259	36018	69166	84602	73845	45433	35073	39246
BCO1	NC_040057.1	7583578	7583699	peak_19200	122	-	-0.0230180247139	1.0	60.6109510086	NA|peak_12444	cds	rna-XM_005018267.4	31	68	42	12	24	21	34	54	41	22	14	31
LOC101797338	NC_040046.1	159175232	159175463	peak_12371	232	+	0.0230167670511	1.0	60.6109510086	peak_954|NA	cds	rna-XM_005012168.4	636	672	596	493	353	296	461	233	235	391	155	178
LRRC20	NC_040051.1	32377313	32377431	peak_3416	119	-	1.02309622592	0.622022411019	249.822057759	peak_8650|NA	cds	rna-XM_027460251.1	228	490	410	248	229	240	49	127	94	25	63	67
ASB1	NC_040052.1	14783924	14784045	peak_5215	122	+	-1.31268847957	0.0191969637389	84.0952037179	NA|peak_9196	utr3	rna-XM_027461415.1	27	31	42	48	41	33	51	74	73	28	32	40
UTP3	NC_040049.1	15547006	15547419	peak_19603	414	-	-0.0230962259249	1.0	60.6109510086	peak_6474|peak_6741	cds	rna-XM_013110048.3	1292	2143	1874	890	1156	857	3042	3879	3190	2023	1739	1855
ARHGAP26	NC_040059.1	2996700	2996820	peak_16877	121	-	-0.97706143416	1.0	60.6109510086	NA|peak_13247	NP_exon	rna-XR_003500503.1	96	170	163	20	77	82	22	171	101	83	72	62
MET	NC_040046.1	176803972	176804033	peak_12641	62	+	0.0230784423125	1.0	60.6109510086	peak_1086|NA	utr3	rna-XM_027457666.1	5	7	8	23	1	2	3	4	3	4	3	7
LRGUK	NC_040046.1	201244885	201245096	peak_12899	212	+	-0.0230962259249	1.0	60.6109510086	peak_1191|peak_1269	cds	rna-XM_027461317.1	70	188	142	63	84	85	151	235	141	87	133	111
DEF6	NC_040072.1	4932109	4932289	peak_9947	181	-	-1.02325388615	0.622002253928	736.904754352	NA|peak_17757	utr3	rna-XM_027444709.1	26	88	23	72	41	27	126	94	89	83	21	26
KIAA0556	NC_040060.1	10991857	10992063	peak_13438	207	-	-0.0230962259249	1.0	60.6109510086	peak_13276|peak_13883	utr5	rna-XM_027468766.1	308	421	317	205	199	157	473	455	588	320	252	295
SLC4A10	NC_040052.1	26472286	26472377	peak_5538	92	-	-0.608059988685	0.685029977553	239.444841452	NA|peak_9716	cds	rna-XM_027461608.1	7	41	11	14	8	5	24	21	37	10	9	10
SRM	NC_040067.1	3380649	3380828	peak_16161	180	+	-0.0231744228972	1.0	60.6109510086	NA|peak_16516	utr3	rna-XM_027443439.1	239	281	260	308	201	129	560	634	290	354	362	236
MYO5C	NC_040057.1	2939675	2939956	peak_19124	282	+	-1.60821638687	0.371025736657	644.376431641	NA|peak_12266	cds	rna-XM_027467081.1	23	30	27	18	34	16	20	30	23	9	7	10
PLCL2	NC_040047.1	37033113	37033443	peak_8400	331	+	-0.0230962259249	1.0	60.6109510086	peak_2917|peak_3033	cds	rna-XM_027451028.1	210	304	265	117	138	135	108	91	65	65	33	38
PIK3CA	NC_040054.1	7406265	7406745	peak_13749	481	+	-0.0230974879642	1.0	60.6109510086	peak_10117|peak_10575	utr3	rna-XM_027464233.1	410	761	630	246	277	175	662	802	808	273	328	346
CEP170B	NC_040050.1	13073043	13085187	peak_6637	12145	-	-1.02309622592	0.622022411019	249.822057759	peak_7711|peak_8068	cds	rna-XM_027457526.1	338	703	470	290	331	247	643	764	834	453	350	410
HTATSF1	NC_040055.1	13989609	13994317	peak_16745	4709	+	-0.0230962259249	1.0	60.6109510086	peak_10724,peak_10725|peak_11202	cds	rna-XM_027465030.1	822	1715	1533	686	1089	776	1731	1975	2030	1258	941	1213
SOX10	NC_040046.1	149280841	149281141	peak_12149	301	-	-1.02309622592	0.622022411019	249.822057759	peak_2261|peak_2388	utr3	rna-XM_005015954.4	132	208	74	78	73	110	153	225	271	110	87	133
CUL4A	NC_040046.1	61121444	61121683	peak_10696	240	+	-0.0230974879642	1.0	60.6109510086	peak_313|peak_322	cds	rna-XM_027444437.1	287	242	365	144	145	106	346	246	356	184	73	122
SIN3B	NC_040065.1	3302135	3303129	peak_4414	995	+	-0.0230962259249	1.0	60.6109510086	peak_14652|peak_15327	utr3	rna-XM_027471775.1	1329	2155	1755	968	1147	821	1837	2233	2211	1193	961	1354
LOC101803343	NC_040054.1	16714768	16714859	peak_14052	92	+	0.562022681457	1.0	60.6109510086	peak_10228|NA	utr5	rna-XM_027464570.1	38	46	32	18	10	8	14	40	22	9	15	13
A4GALT	NC_040046.1	129336805	129337016	peak_11785	212	-	0.0230167670511	1.0	60.6109510086	peak_2084|NA	cds	rna-XM_027450043.1	30	55	56	23	10	53	28	25	40	15	14	64
NCALD	NC_040047.1	135170411	135170592	peak_9485	182	-	-0.0230962259249	1.0	60.6109510086	peak_4187|peak_4388	utr3	rna-XM_005010603.4	51	55	90	28	35	49	139	180	146	131	77	116
FRYL	NC_040049.1	49591428	49592058	peak_20156	631	+	-0.0230962259249	1.0	60.6109510086	peak_6219|peak_6479	utr3	rna-XM_027457121.1	453	605	481	319	274	189	566	674	471	303	333	241
USP54	NC_040051.1	21567977	21568277	peak_3259	301	-	-0.0230962259249	1.0	60.6109510086	peak_8589|peak_8992	cds	rna-XM_027460881.1	319	673	563	259	280	247	350	396	354	228	196	196
AQR	NC_040050.1	45734154	45738811	peak_7453	4658	+	-0.0230962259249	1.0	60.6109510086	peak_7442|peak_7782	utr3	rna-XM_027457516.1	1429	2643	2204	975	1207	832	2417	3305	2365	1661	1191	1076
SFSWAP	NC_040061.1	2282451	2282571	peak_20595	121	+	-0.0230949640235	1.0	60.6109510086	NA|peak_13994	utr5	rna-XM_005018087.4	181	315	258	222	261	181	324	391	299	340	219	254
ARHGAP5	NC_040050.1	48526726	48527057	peak_7480	332	+	-0.0230962259249	1.0	60.6109510086	peak_7448|peak_7792	cds	rna-XM_027457704.1	480	995	746	342	492	275	1033	1173	1097	608	517	523
C2H8orf34	NC_040047.1	121655429	121659477	peak_9317	4049	+	-1.02325388615	0.622002253928	736.904754352	NA|peak_3471	cds	rna-XM_027452320.1	2	12	3	4	5	5	18	15	18	9	2	11
SECISBP2	NC_040075.1	44213015	44216804	peak_17919	3790	+	0.976903774075	1.0	60.6109510086	peak_17766|peak_18565	cds	rna-XM_027446126.1	379	713	485	256	378	255	693	857	768	486	452	432
LRRC3B	NC_040047.1	40756094	40756541	peak_8440	448	+	-0.0231756891752	1.0	60.6109510086	peak_2929|peak_3048	utr3	rna-XM_027451080.1	247	385	152	128	186	69	505	372	420	207	180	185
KIAA2026	NC_040075.1	27987723	27994857	peak_17762	7135	-	-0.0230962259249	1.0	60.6109510086	peak_18111|peak_18928	cds	rna-XM_027446137.1	285	672	615	236	386	232	532	676	572	392	254	323
COG4	NC_040056.1	17728941	17729355	peak_565	415	-	0.0230962259249	1.0	60.6109510086	peak_11592|NA	cds	rna-XM_027465683.1	155	301	203	145	151	122	275	255	339	213	200	181
PDGFRB	NC_040059.1	7548274	7549143	peak_17023	870	-	-0.0230962259249	1.0	60.6109510086	peak_12725,peak_12726|peak_13302	utr3	rna-XM_027468639.1	1783	3864	2742	1224	1792	1177	2045	2830	2408	1099	1095	1212
PTH1R	NC_040047.1	1012957	1015536	peak_7854	2580	-	0.561865012757	1.0	60.6109510086	peak_3493|peak_3650	utr3	rna-XM_021274978.2	156	275	300	87	64	97	1457	1774	1662	741	568	625
LMO7	NC_040046.1	42462865	42476692	peak_10562	13828	+	-0.0230180247139	1.0	60.6109510086	peak_260|peak_270	cds	rna-XM_027473246.1	15546	27193	23900	10130	11446	8850	13120	15114	13506	8414	5631	6745
WWC2	NC_040049.1	20828003	20828333	peak_19739	331	-	-0.0231756891752	1.0	60.6109510086	peak_6516|peak_6785	cds	rna-XM_027456301.1	133	259	223	117	104	88	209	265	176	75	108	99
LOC101799421	NC_040054.1	13804058	13809596	peak_13909	5539	-	-0.0230167670511	1.0	60.6109510086	peak_10431,peak_10432|peak_10894,peak_10640	cds	rna-XM_005014351.4	235	365	206	233	272	91	181	178	159	134	77	161
NPNT	NC_040049.1	5469760	5469999	peak_19455	240	-	-0.0230962259249	1.0	60.6109510086	peak_6405|peak_6684	cds	rna-XM_027456809.1	2668	4623	3977	2462	2870	2070	4237	6236	4275	3266	3328	3024
BCL2L1	NC_040066.1	14897774	14912614	peak_6217	14841	-	0.976903774075	1.0	60.6109510086	peak_15692|peak_16398	cds	rna-XM_027472806.1	2830	5053	4515	2452	2504	2100	5209	6964	6224	3407	3572	3783
SLC16A5	NC_040064.1	4072417	4074153	peak_1925	1737	-	0.0230962259249	1.0	60.6109510086	peak_14503|NA	cds	rna-XM_027471719.1	62	137	115	70	117	63	79	65	61	48	46	50
ALX1	NC_040046.1	152487696	152487905	peak_12257	210	+	-1.02317568918	0.622012251195	633.83074332	NA|peak_993	cds	rna-XM_005018392.4	2	8	0	2	5	0	70	45	32	28	19	12
RSPRY1	NC_040056.1	18876149	18876598	peak_636	450	-	-0.0230962259249	1.0	60.6109510086	peak_11631|peak_12146	cds	rna-XM_027465858.1	208	367	258	120	177	103	356	544	448	311	156	252
MMRN2	NC_040051.1	28636187	28636666	peak_3359	480	+	-0.0230962259249	1.0	60.6109510086	peak_8373|peak_8772	utr3	rna-XM_021276778.1	936	1856	1740	728	1021	813	855	1087	947	520	444	522
LOC101794490	NC_040057.1	13707850	13707911	peak_19273	62	+	-0.976903774075	1.0	60.6109510086	NA|peak_12335	NP_exon	gene-LOC101794490.trans	12	27	23	5	14	15	16	28	25	13	14	14
ANKRD12	NC_040047.1	106801533	106802103	peak_9130	571	+	-0.0230962259249	1.0	60.6109510086	peak_3225,peak_3226|peak_3366	cds	rna-XM_027452049.1	457	812	787	366	525	341	457	446	412	365	200	249
PLEKHM2	NC_040067.1	817372	819279	peak_16040	1908	+	-0.0230962259249	1.0	60.6109510086	peak_15751|peak_16462	cds	rna-XM_027443119.1	2090	3858	3045	1592	2028	1403	2915	3505	3282	1777	1573	1779
MSANTD4	NC_040046.1	15316078	15316469	peak_10232	392	-	-0.0230974879642	1.0	60.6109510086	peak_1335|peak_1417	cds	rna-XM_027468247.1	391	772	658	205	312	194	880	1202	1115	515	437	455
IFFO1	NC_040046.1	121555075	121558363	peak_11576	3289	-	-0.0230962259249	1.0	60.6109510086	peak_1996,peak_1997|peak_2101,peak_2100	utr3	rna-XM_027449738.1	3061	6049	4694	2837	4026	2593	2201	2815	2529	1587	1524	1737
SMTNL2	NC_040065.1	5374144	5374325	peak_4590	182	+	0.0230167670511	1.0	60.6109510086	peak_14751|NA	utr3	rna-XM_027472568.1	345	668	439	303	412	201	184	158	146	145	107	108
RNF20	NC_040075.1	69338596	69341273	peak_18210	2678	+	-0.0230962259249	1.0	60.6109510086	peak_17898|peak_18704	cds	rna-XM_027446474.1	1474	2731	2377	1468	1927	1328	2300	3023	2537	1997	1647	1770
ZFYVE9	NC_040053.1	10634569	10634839	peak_2271	271	-	-0.0230962259249	1.0	60.6109510086	peak_9834|peak_10269	cds	rna-XM_027463404.1	125	239	167	96	137	47	246	269	264	165	139	118
MALSU1	NC_040047.1	33382331	33383448	peak_8328	1118	+	0.976903774075	1.0	60.6109510086	peak_2903|NA	cds	rna-XM_027450933.1	497	983	777	527	342	355	1708	1316	1864	1674	591	1235
PHACTR1	NC_040047.1	62934861	62937284	peak_8743	2424	-	0.0230167670511	1.0	60.6109510086	peak_3869|NA	cds	rna-XM_027451466.1	8	25	17	9	13	8	11	44	37	10	44	22
IWS1	NC_040054.1	17156877	17166529	peak_14080	9653	-	-0.0230180247139	1.0	60.6109510086	peak_10510|peak_10968	cds	rna-XM_027464474.1	11333	22500	18519	7504	9958	6804	20061	24451	22040	11557	9506	10836
5a0feb5c-7efd-4cae-8f48-8b95c4682aac	NC_040061.1	10962461	10963489	peak_20926	1029	-	-0.0230962259249	1.0	60.6109510086	peak_13720,peak_13717|peak_14362,peak_14364	NP_exon	5a0feb5c-7efd-4cae-8f48-8b95c4682aac.trans	404	768	667	365	478	329	521	716	623	460	377	434
ZCCHC24	NC_040051.1	25712865	25713105	peak_3320	241	-	-0.0230962259249	1.0	60.6109510086	peak_8617|peak_9019	utr3	rna-XM_027460141.1	1312	2744	2065	1264	1660	1092	1498	2005	1827	1039	1074	1192
AGBL1	NC_040056.1	7432777	7460326	peak_209	27550	+	-0.0230167670511	1.0	60.6109510086	peak_11063|peak_11541	utr3	rna-XM_027466124.1	151	254	363	164	139	143	209	190	310	185	119	225
LOC101799519	NC_040065.1	2413637	2413996	peak_4362	360	+	-0.0230962259249	1.0	60.6109510086	peak_14627|peak_15306	utr3	rna-XM_027472253.1	588	767	668	453	418	269	539	1024	697	437	393	318
CACNA1C	NC_040046.1	138598580	138607213	peak_11890	8634	-	-0.0230962259249	1.0	60.6109510086	peak_2143|peak_2264	cds	rna-XM_027463284.1	60	166	123	49	72	64	615	692	647	402	302	315
LOC101796682	NC_040048.1	34412311	34412759	peak_14919	449	-	0.976903774075	1.0	60.6109510086	peak_5421|peak_5657	utr3	rna-XM_005016795.4	304	412	410	202	178	219	309	404	472	238	209	316
APBB2	NC_040049.1	52069520	52069581	peak_20188	62	+	0.0230962259249	1.0	60.6109510086	peak_6225|NA	utr5	rna-XM_027457204.1	19	38	41	14	21	14	65	56	83	36	16	49
EPB41L5	NC_040052.1	30410340	30410550	peak_5641	211	-	-1.02309622592	0.622022411019	249.822057759	peak_9344|peak_9748	utr3	rna-XM_027461735.1	122	206	108	106	104	78	155	195	157	68	107	98
RABL6	NC_040063.1	498035	498364	peak_18585	330	-	-0.0230962259249	1.0	60.6109510086	peak_14054|peak_14695	cds	rna-XM_013095019.3	1209	2224	1683	976	1245	977	2205	3306	2675	1720	1871	1650
PTPN13	NC_040049.1	45127691	45128511	peak_20048	821	+	-1.02309622592	0.622022411019	249.822057759	peak_6172|peak_6437	cds	rna-XM_027456957.1	168	311	256	155	197	132	564	595	551	349	280	260
C9H3orf70	NC_040054.1	16244688	16244838	peak_14026	151	+	-0.0230962259249	1.0	60.6109510086	peak_10220|peak_10684	utr3	rna-XM_027464024.1	100	227	150	94	148	79	216	276	265	186	158	155
LOC113842516	NC_040047.1	35034564	35034655	peak_8360	92	-	-0.0230167670511	1.0	60.6109510086	NA|peak_3878	cds	rna-XM_027450110.1	16	111	56	50	42	26	56	57	11	46	21	32
DCLRE1C	NC_040046.1	195524442	195524742	peak_12831	301	+	-0.608059988685	0.685029977553	239.444841452	peak_1161|peak_1238	cds	rna-XM_027460277.1	109	271	221	68	92	71	307	424	541	158	127	179
PLEKHF1	NC_040057.1	15287513	15287694	peak_19293	182	-	-0.0230949640235	1.0	60.6109510086	NA|peak_12487	cds	rna-XM_021272923.2	100	192	158	117	157	100	123	123	121	79	90	112
OSBPL11	NC_040052.1	27493380	27498613	peak_5572	5234	+	-0.0230962259249	1.0	60.6109510086	peak_9030|peak_9414,peak_9415	utr3	rna-XM_027462321.1	665	1078	950	616	604	538	1083	1465	1187	850	668	821
COL4A1	NC_040046.1	59802035	59805690	peak_10679	3656	+	-0.0230962259249	1.0	60.6109510086	peak_303|peak_315	cds	rna-XM_027444310.1	14784	29637	22464	14449	16891	12518	9578	14459	10539	7304	7034	6742
37f23e7d-a028-4b9f-b1f7-d53d810c477b	NC_040075.1	63710178	63710562	peak_18144	385	-	-0.0230962259249	1.0	60.6109510086	peak_18302,peak_18303|peak_19128,peak_19129	NP_exon	37f23e7d-a028-4b9f-b1f7-d53d810c477b.trans	834	1647	1279	789	1037	723	1831	2065	1481	1425	1123	992
BCL11A	NC_040048.1	7727419	7727898	peak_14386	480	-	-0.0230974879642	1.0	60.6109510086	peak_5197|peak_5446	cds	rna-XM_027453273.1	376	768	627	293	131	252	1444	1313	1314	763	371	524
CLSTN2	NC_040054.1	19468347	19469458	peak_14116	1112	+	-0.0230974879642	1.0	60.6109510086	peak_10257|peak_10721	utr3	rna-XM_027464574.1	1469	1912	1470	860	768	493	2051	1996	2437	1038	588	1061
RIPK4	NC_040046.1	79610258	79610408	peak_10991	151	-	-0.976903774075	1.0	60.6109510086	NA|peak_1811	utr3	rna-XM_027448389.1	4	5	8	6	0	3	50	55	31	28	17	43
KIAA1191	NC_040059.1	10690352	10690592	peak_17113	241	-	-0.0230962259249	1.0	60.6109510086	peak_12759|peak_13343	utr3	rna-XM_027468713.1	305	572	358	269	348	183	446	556	591	319	247	363
MFSD6	NC_040052.1	8295610	8295940	peak_5119	331	-	-0.0230180247139	1.0	60.6109510086	peak_9170|peak_9561	utr3	rna-XM_027460943.1	93	184	118	43	74	64	210	317	196	105	101	143
OBSCN	NC_040047.1	2533562	2535259	peak_7884	1698	+	-0.0230962259249	1.0	60.6109510086	peak_2677|peak_2814	cds	rna-XM_027450316.1	7136	10883	10105	5325	5784	4025	2635	2261	2584	1797	1053	1401
LOC101803756	NC_040063.1	56237	57965	peak_18558	1729	-	-0.0230180247139	1.0	60.6109510086	NA|peak_14678	NP_exon	rna-XR_003501014.1	27	127	129	16	38	56	109	104	105	60	53	63
SIPA1L1	NC_040050.1	40029701	40030390	peak_7344	690	-	0.976903774075	1.0	60.6109510086	peak_8009|peak_8385	cds	rna-XM_027458311.1	899	1860	1544	731	1002	644	682	1040	895	573	445	539
DDHD2	NC_040068.1	1691046	1691825	peak_1040	780	+	0.0230949640235	1.0	60.6109510086	peak_16100|NA	cds	rna-XM_027443658.1	168	263	225	177	254	128	201	215	252	200	175	216
OSGIN1	NC_040056.1	16772671	16772970	peak_513	300	+	-1.02309622592	0.622022411019	249.822057759	NA|peak_11683	cds	rna-XM_027466237.1	52	138	85	59	74	53	155	162	147	100	60	76
CCDC18	NC_040053.1	35585027	35587003	peak_2830	1977	-	0.976903774075	1.0	60.6109510086	peak_10055|NA	cds	rna-XM_005026544.4	201	300	246	134	172	109	256	200	211	211	107	145
MTCH2	NC_040050.1	34610386	34610714	peak_7083	329	+	-0.0230962259249	1.0	60.6109510086	peak_7264|peak_7589	utr3	rna-XM_027458990.1	1928	3115	2715	1728	2037	1494	2947	3609	2844	2258	2287	2123
LOC101798971	NC_040055.1	19312165	19312402	peak_16800	238	-	0.976903774075	1.0	60.6109510086	peak_10959|peak_11441	utr3	rna-XM_005011488.4	516	834	823	362	399	326	155	253	171	109	183	107
NCKAP5	NC_040052.1	33926580	33926641	peak_5682	62	+	-11.2006799067	0.0	0.0	NA|peak_9462	cds	rna-XM_021272932.2	0	0	0	0	0	0	1	5	0	0	2	1
RIMBP2	NC_040061.1	1633035	1633156	peak_20588	122	-	-1.6082958545	0.371012301251	706.958406246	NA|peak_14211	cds	rna-XM_021271356.2	21	48	26	24	54	9	13	27	34	5	9	9
NIPSNAP2	NC_040065.1	11441771	11444857	peak_4921	3087	-	-0.0230167670511	1.0	60.6109510086	peak_15237|peak_15913	cds	rna-XM_027472283.1	1518	2534	2352	1685	1946	1423	1669	2250	1948	1575	1516	1630
RMND1	NC_040048.1	51427388	51428239	peak_15159	852	-	-1.02309622592	0.622022411019	249.822057759	peak_5525|peak_5764	cds	rna-XM_021272930.2	155	365	262	157	180	128	303	400	269	183	179	126
STAT3	NC_040073.1	2852786	2852906	peak_3597	121	-	0.976903774075	1.0	60.6109510086	peak_17269|peak_18030	utr3	rna-XM_027445284.1	276	377	344	131	199	176	321	311	226	201	170	173
CDAN1	NC_040050.1	38803232	38804049	peak_7295	818	-	-1.02309622592	0.622022411019	249.822057759	peak_7978|peak_8352	utr3	rna-XM_027458591.1	188	366	312	189	212	200	279	400	347	146	190	143
TOB2	NC_040046.1	160749008	160749277	peak_12436	270	+	-0.0230962259249	1.0	60.6109510086	peak_998|peak_1085	utr3	rna-XM_027454047.1	1100	1976	1204	808	775	561	1111	1226	1627	684	566	900
RAB11FIP3	NC_040060.1	12245246	12259240	peak_13502	13995	+	-0.0230962259249	1.0	60.6109510086	peak_13042,peak_13044,peak_13043|peak_13627,peak_13628	utr3	rna-XM_027469384.1	2323	3389	3280	1637	1538	1321	5046	5429	4955	3001	2403	2578
SH2D4B	NC_040051.1	26847251	26857072	peak_3341	9822	+	0.976981975286	1.0	60.6109510086	peak_8365|NA	cds	rna-XM_021269760.2	11	13	13	5	7	3	6	24	20	11	4	14
WEE1	NC_040052.1	2607400	2607579	peak_5007	180	+	-0.0230962259249	1.0	60.6109510086	peak_8704|peak_9104	cds	rna-XM_027461613.1	242	437	375	182	267	189	498	649	520	359	329	379
80baa353-bc5c-475c-b75c-84f78d9d7f99	NC_040052.1	37722241	37722331	peak_5768	91	-	-0.977138390426	0.687534042138	238.424222522	NA|peak_9805,peak_9806	NP_exon	80baa353-bc5c-475c-b75c-84f78d9d7f99.trans	2	7	8	4	0	0	21	17	9	13	0	8
LOC101800968	NC_040046.1	177441424	177441963	peak_12651	540	+	-0.0230192825141	1.0	60.6109510086	peak_1093|peak_1169	cds	rna-XM_027455508.1	1084	1985	1675	522	622	358	1494	1894	1718	831	483	632
CMTM4	NC_040057.1	12020967	12021297	peak_19230	331	-	-0.0231756891752	1.0	60.6109510086	peak_11914|peak_12457	utr3	rna-XM_027466757.1	82	195	169	74	86	53	274	241	267	123	100	119
STMN1	NC_040069.1	2580693	2581708	peak_4039	1016	-	-0.0230167670511	1.0	60.6109510086	peak_16351|peak_17092	utr5	rna-XM_027443847.1	7051	12267	10943	6182	7987	5662	7743	10095	8997	8849	5401	6812
PTPRA	NC_040049.1	73562799	73565224	peak_20494	2426	+	-0.0230962259249	1.0	60.6109510086	peak_6344|peak_6627	cds	rna-XM_027455822.1	504	1019	814	550	569	453	1230	1464	1227	945	849	919
DENND6A	NC_040058.1	18912998	18913149	peak_1575	152	-	0.0230167670511	1.0	60.6109510086	peak_12352|NA	utr3	rna-XM_027467413.1	120	224	218	142	174	110	279	317	199	280	149	173
EDARADD	NC_040048.1	24773728	24773879	peak_14763	152	+	0.976981975286	1.0	60.6109510086	peak_4543|NA	utr3	rna-XM_027453776.1	56	48	32	30	14	13	64	63	72	50	29	41
ZC3H6	NC_040048.1	5034871	5036099	peak_14326	1229	-	-0.0230962259249	1.0	60.6109510086	peak_5165,peak_5166|peak_5417	cds	rna-XM_005018882.4	1230	2467	2159	972	1188	859	2211	3009	2474	1219	1393	1395
ZHX2	NC_040047.1	144195979	144196160	peak_9559	182	+	-0.0230962259249	1.0	60.6109510086	peak_3430|peak_3582	cds	rna-XM_027452654.1	184	320	244	163	227	144	326	464	395	270	228	307
SSR2	NC_040071.1	686855	687433	peak_884	579	+	-0.0230962259249	1.0	60.6109510086	peak_16649|peak_17399	utr3	rna-XM_027444497.1	3341	6185	5453	2311	2875	2340	7064	8067	7440	4428	3462	4127
RTCB	NC_040046.1	147067514	147067634	peak_12078	121	-	0.0230167670511	1.0	60.6109510086	peak_2235|NA	utr5	rna-XM_027449922.1	472	789	727	479	415	398	862	1203	1231	870	669	881
ARX	NC_040046.1	88381842	88381932	peak_11093	91	+	0.976983232949	1.0	60.6109510086	peak_471|NA	utr3	rna-XM_027449035.1	131	240	155	123	80	75	266	219	202	260	104	159
KCNK13	NC_040050.1	21686680	21686950	peak_6822	271	-	-0.608059988685	0.685029977553	239.444841452	peak_7797|peak_8155	utr3	rna-XM_027458087.1	12	35	40	10	12	14	35	43	33	12	20	5
PTEN	NC_040051.1	29679027	29680268	peak_3377	1242	-	-0.0230962259249	1.0	60.6109510086	peak_8636|peak_9041	utr3	rna-XM_027460418.1	265	522	460	238	393	239	671	814	638	613	377	465
TOMM22	NC_040046.1	149465163	149465723	peak_12168	561	+	-1.02309622592	0.622022411019	249.822057759	peak_871|peak_934	utr3	rna-XM_027450695.1	2301	4317	3853	1946	2262	1808	3956	5210	4392	2541	2392	2660
FNBP4	NC_040050.1	34601412	34602096	peak_7081	685	+	-0.0230962259249	1.0	60.6109510086	peak_7262|peak_7587	cds	rna-XM_027458061.1	857	1724	1816	696	1006	936	1399	1660	1383	1052	1016	979
ADCY7	NC_040057.1	17325061	17325263	peak_19326	203	+	-0.0230962259249	1.0	60.6109510086	NA|peak_12351	cds	rna-XM_005021583.4	15	51	12	11	19	14	99	74	67	47	18	44
LOC101790071	NC_040046.1	201378697	201388160	peak_12900	9464	+	-0.0230962259249	1.0	60.6109510086	peak_1192|peak_1270	cds	rna-XM_027461372.1	45	110	98	66	56	61	1241	1771	1937	884	904	1160
NEMP1	NC_040073.1	5831642	5831851	peak_3812	210	-	-0.0230962259249	1.0	60.6109510086	NA|peak_18123	utr3	rna-XM_027445510.1	105	210	142	49	121	78	255	335	172	169	171	96
THADA	NC_040048.1	38404452	38404543	peak_14971	92	+	0.0230962259249	1.0	60.6109510086	peak_4643|NA	cds	rna-XM_027454104.1	45	62	81	44	42	24	124	98	119	74	74	79
TTC12	NC_040070.1	6935553	6935963	peak_18525	411	-	-0.0230962259249	1.0	60.6109510086	peak_16613|peak_17361	NP_exon	rna-XR_001195969.3	150	295	289	156	203	143	254	338	260	193	173	194
COL7A1	NC_040058.1	19338198	19339447	peak_1595	1250	+	0.0230949640235	1.0	60.6109510086	peak_12158|NA	cds	rna-XM_027467874.1	82	183	99	55	184	108	607	511	311	439	354	343
SAMD4A	NC_040050.1	8122485	8122965	peak_6493	481	+	-1.02309622592	0.622022411019	249.822057759	peak_6968|peak_7274	utr3	rna-XM_027459282.1	823	1107	846	739	561	553	772	1029	1081	509	520	548
LOC113839624	NC_040046.1	61227862	61228043	peak_10704	182	-	-0.0230962259249	1.0	60.6109510086	NA|peak_1657	cds	rna-XM_027444490.1	417	367	646	296	184	278	140	226	163	101	93	84
GLIS1	NC_040053.1	9859696	9860026	peak_2243	331	+	-1.02325388615	0.622002253928	736.904754352	NA|peak_9884	cds	rna-XM_027462877.1	2	4	0	0	4	2	162	278	167	72	102	89
MFSD6	NC_040052.1	8294891	8295042	peak_5118	152	-	0.976983232949	1.0	60.6109510086	peak_9169|NA	utr3	rna-XM_027460943.1	30	56	37	9	34	22	51	67	42	49	44	54
NCOA6	NC_040066.1	6966338	6966609	peak_5987	272	-	-0.0230962259249	1.0	60.6109510086	peak_15591|peak_16282	cds	rna-XM_005018011.4	430	811	640	372	499	344	672	737	551	517	402	360
8ebbf28f-f185-4898-8e6f-5e5ab60a5d8c	NC_040046.1	174934928	174935322	peak_12626	395	-	-0.0230180247139	1.0	60.6109510086	peak_2466,peak_2464|peak_2593,peak_2589	NP_exon	8ebbf28f-f185-4898-8e6f-5e5ab60a5d8c.trans	471	1047	566	293	459	230	307	482	350	207	186	186
BAHD1	NC_040050.1	35275461	35276032	peak_7118	572	+	-1.02309622592	0.622022411019	249.822057759	peak_7280|peak_7609	cds	rna-XM_027458260.1	266	630	444	271	398	240	1012	1449	1301	664	710	717
LOC101790506	NC_040072.1	929872	929933	peak_9745	62	+	0.0230949640235	1.0	60.6109510086	peak_16789|NA	NP_exon	rna-XR_003492563.1	12	58	12	19	36	17	26	18	21	21	25	11
NOP58	NC_040052.1	16401577	16412266	peak_5273	10690	+	-0.0230180247139	1.0	60.6109510086	peak_8838,peak_8839|peak_9239,peak_9240	utr3	rna-XM_027461470.1	13788	29910	25249	8549	13578	9086	32178	42640	33833	20418	15270	15393
DIXDC1	NC_040070.1	7414168	7415552	peak_18537	1385	-	-0.0230962259249	1.0	60.6109510086	peak_16623|peak_17373	cds	rna-XM_021279444.2	109	211	133	75	137	86	393	512	398	327	295	306
CCNA2	NC_040049.1	43374355	43374476	peak_19997	122	+	-0.0230962259249	1.0	60.6109510086	NA|peak_6414	utr3	rna-XM_005015540.4	168	356	313	164	248	138	405	437	366	338	230	271
PAPPA	NC_040063.1	3298899	3299020	peak_18677	122	+	-0.0230192825141	1.0	60.6109510086	NA|peak_14517	utr5	rna-XM_005022381.4	5	18	11	0	6	4	22	26	30	2	13	11
ZFYVE9	NC_040053.1	10633432	10634032	peak_2269	601	-	-0.0230974879642	1.0	60.6109510086	peak_9833|peak_10267	cds	rna-XM_027463404.1	556	1066	848	309	427	287	1012	1171	1001	486	405	503
OGFRL1	NC_040048.1	87207648	87207769	peak_15607	122	+	0.0230167670511	1.0	60.6109510086	peak_4954|NA	utr3	rna-XM_027455021.1	15	20	12	15	12	4	12	29	24	9	18	30
TNIP2	NC_040049.1	67175244	67175748	peak_20394	505	+	-1.02309622592	0.622022411019	249.822057759	NA|peak_6589	cds	rna-XM_021269978.2	42	81	66	27	60	39	60	112	81	41	54	42
RORA	NC_040056.1	15492389	15492660	peak_481	272	+	-1.02309622592	0.622022411019	249.822057759	peak_11174|peak_11665	cds	rna-XM_027466154.1	98	247	190	87	151	103	214	197	179	148	84	105
ENTPD2	NC_040063.1	251215	251425	peak_18566	211	+	0.0230167670511	1.0	60.6109510086	peak_13830|NA	utr3	rna-XM_027470769.1	161	330	294	139	205	129	70	71	57	64	65	41
LOC101795226	NC_040053.1	26503113	26505411	peak_2621	2299	+	-0.0230962259249	1.0	60.6109510086	peak_9654|peak_10074	utr3	rna-XM_027463598.1	164	264	197	172	161	137	303	323	200	194	203	113
NTN3	NC_040060.1	12534464	12534734	peak_13519	271	-	-1.02309622592	0.622022411019	249.822057759	NA|peak_13933	utr3	rna-XM_027469461.1	144	313	219	110	196	149	228	333	256	144	176	135
HMCN1	NC_040053.1	21724389	21726588	peak_2488	2200	+	-0.976983232949	1.0	60.6109510086	NA|peak_10004	cds	rna-XM_027462402.1	18	36	32	12	23	12	66	91	75	58	65	64
NFAT5	NC_040056.1	20856191	20856282	peak_767	92	+	-0.0231744228972	1.0	60.6109510086	NA|peak_11806	cds	rna-XM_027466608.1	270	366	366	330	341	186	453	616	605	400	339	417
GTF3C1	NC_040060.1	10986717	10987047	peak_13437	331	+	-0.0230962259249	1.0	60.6109510086	peak_13022|peak_13605	cds	rna-XM_027468761.1	94	183	171	84	111	60	207	292	193	129	99	124
SAMD4A	NC_040050.1	8053856	8054510	peak_6491	655	+	-0.0230180247139	1.0	60.6109510086	peak_6966|peak_7272	utr5	rna-XM_027459277.1	434	973	751	356	339	283	776	940	780	484	285	339
SLC45A3	NC_040072.1	2337074	2337254	peak_9804	181	+	-0.0230962259249	1.0	60.6109510086	NA|peak_17558	utr5	rna-XM_027444842.1	41	61	61	37	33	32	105	118	144	62	84	89
LOC101793706	NC_040075.1	37628205	37646040	peak_17859	17836	-	-0.561944476007	1.0	60.6109510086	NA|peak_18970	cds	rna-XM_027446489.1	52	134	46	29	36	21	63	88	77	34	26	44
CLIP2	NC_040074.1	1288430	1302766	peak_1127	14337	+	-0.0230962259249	1.0	60.6109510086	peak_17402|peak_18175	cds	rna-XM_027445897.1	2903	5466	4832	2254	2798	2118	5771	7731	6640	3428	3284	3622
SPSB1	NC_040067.1	4209530	4209710	peak_16193	181	-	-0.0230962259249	1.0	60.6109510086	NA|peak_16687	utr3	rna-XM_005015425.4	141	326	260	158	180	162	313	328	274	226	167	236
SLC44A1	NC_040075.1	48713089	48714670	peak_17968	1582	-	0.0230962259249	1.0	60.6109510086	peak_18217|NA	cds	rna-XM_027447054.1	140	234	208	137	166	145	125	225	138	118	111	96
KLHL24	NC_040054.1	13905228	13905289	peak_13918	62	-	0.0230167670511	1.0	60.6109510086	peak_10437|NA	cds	rna-XM_027464304.1	244	353	349	207	196	162	200	231	238	199	159	137
IGSF3	NC_040046.1	107599073	107599254	peak_11304	182	-	-0.0230167670511	1.0	60.6109510086	NA|peak_1950	utr3	rna-XM_027449359.1	301	403	359	223	310	257	341	417	329	211	281	298
GGA3	NC_040064.1	4007023	4008992	peak_1918	1970	+	-1.02309622592	0.622022411019	249.822057759	peak_14342|peak_15005	cds	rna-XM_027471627.1	303	661	507	332	498	343	402	552	580	289	283	304
CKAP4	NC_040046.1	146413981	146414042	peak_12054	62	-	-0.0231744228972	1.0	60.6109510086	NA|peak_2348	utr3	rna-XM_027449684.1	130	213	157	127	208	113	316	412	409	262	212	248
CTDSPL2	NC_040056.1	715902	716023	peak_65	122	+	0.0230167670511	1.0	60.6109510086	peak_10993|NA	utr3	rna-XM_027465626.1	79	162	122	60	100	51	113	129	114	123	118	93
BRD3	NC_040063.1	6084964	6085897	peak_18753	934	+	0.976903774075	1.0	60.6109510086	peak_13905|peak_14543	utr5	rna-XM_027470580.1	322	526	442	209	342	167	449	464	501	363	240	270
ST6GALNAC5	NC_040053.1	16271883	16279587	peak_2400	7705	+	-1.02309622592	0.622022411019	249.822057759	peak_9554|peak_9958	utr3	rna-XM_027463077.1	258	422	352	198	206	187	245	333	336	151	160	158
LOC101793955	NC_040048.1	3867096	3867727	peak_14292	632	-	0.976903774075	1.0	60.6109510086	peak_5150|peak_5397,peak_5398	cds	rna-XM_027453150.1	656	1313	941	486	666	465	879	1115	1096	633	642	638
LOC101796956	NC_040061.1	6955272	6955512	peak_20759	241	-	1.29914469924	0.453184573773	604.294855975	peak_13644|peak_14283	NP_exon	rna-XR_001194022.3	18	41	30	3	0	14	49	56	70	35	19	33
SON	NC_040046.1	94147642	94147733	peak_11189	92	-	0.0230167670511	1.0	60.6109510086	peak_1791|NA	cds	rna-XM_027449158.1	416	666	577	334	476	337	588	835	808	584	617	594
GJA5	NC_040046.1	107400788	107400969	peak_11288	182	+	-0.0230962259249	1.0	60.6109510086	peak_549|peak_581	cds	rna-XM_027449342.1	2938	5800	5599	2417	3443	2684	3094	3348	2255	2460	1721	1554
ADCY9	NC_040060.1	11731435	11735740	peak_13480	4306	-	-0.0230962259249	1.0	60.6109510086	NA|peak_13915	cds	rna-XM_027468855.1	603	1255	958	684	905	601	831	984	855	644	586	670
HS3ST4	NC_040060.1	550631	550812	peak_13059	182	-	-2.0232551568	0.215045056389	487.780931776	NA|peak_13700	NP_exon	rna-XR_003500694.1	10	13	17	10	5	10	42	36	52	12	23	2
NFATC3	NC_040057.1	20764002	20764213	peak_19368	212	+	0.976903774075	1.0	60.6109510086	peak_11842|peak_12379	cds	rna-XM_027467153.1	308	508	405	220	252	205	461	591	467	292	371	324
TULP1	NC_040072.1	4839955	4840134	peak_9937	180	+	-0.0230167670511	1.0	60.6109510086	NA|peak_17626	utr3	rna-XM_027444905.1	71	105	57	29	62	52	31	121	11	59	38	71
VAPA	NC_040047.1	107057198	107057348	peak_9139	151	+	0.976981975286	1.0	60.6109510086	peak_3235|peak_3373	utr3	rna-XM_021266650.2	80	214	120	66	69	50	97	105	75	68	45	50
43fdf53a-2a06-4828-a924-3f8848a06cc6	NC_040075.1	14156775	14158857	peak_17561	2083	-	-0.0230962259249	1.0	60.6109510086	peak_18032,peak_18033|peak_18845,peak_18846	NP_exon	43fdf53a-2a06-4828-a924-3f8848a06cc6.trans	2659	3703	4472	2370	2361	2373	4362	4374	3618	3636	2300	2351
ANKRD27	NC_040057.1	13696480	13696840	peak_19270	361	+	-0.0230962259249	1.0	60.6109510086	peak_11804|peak_12332,peak_12333	utr3	rna-XM_027466815.1	106	180	159	71	99	69	122	188	193	89	77	80
NDST1	NC_040059.1	7738319	7743735	peak_17038	5417	+	0.0230167670511	1.0	60.6109510086	peak_12517|NA	cds	rna-XM_027468673.1	626	1135	954	708	683	595	1099	1224	1038	840	895	911
LOC101801987	NC_040048.1	16295588	16296096	peak_14573	509	+	-0.0230180247139	1.0	60.6109510086	peak_4461|peak_4675	cds	rna-XM_027452976.1	394	649	810	346	203	329	1015	756	880	593	292	373
RAB1A	NC_040048.1	14292881	14294450	peak_14487	1570	+	0.0230949640235	1.0	60.6109510086	peak_4426|NA	cds	rna-XM_027453418.1	1175	2142	1694	1710	2251	1184	2063	3291	2769	2927	2130	2211
MACF1	NC_040069.1	109266	109867	peak_3929	602	-	-0.0230962259249	1.0	60.6109510086	peak_16296|peak_17027	cds	rna-XM_027443786.1	2040	3589	3671	1703	2226	1559	2616	3396	3010	1799	1710	1806
GOLGA1	NC_040063.1	10669853	10673810	peak_19018	3958	+	-0.0230962259249	1.0	60.6109510086	peak_14030|peak_14668	cds	rna-XM_005024445.4	385	585	603	323	429	212	481	698	769	432	382	477
BBS7	NC_040049.1	43349559	43349868	peak_19994	310	+	-0.0230962259249	1.0	60.6109510086	NA|peak_6411	cds	rna-XM_027456240.1	18	75	37	19	26	19	72	71	94	46	29	53
CARD9	NC_040063.1	8763257	8764022	peak_18938	766	+	-0.0230962259249	1.0	60.6109510086	peak_13990|peak_14630	cds	rna-XM_027470758.1	103	88	127	94	32	42	204	243	238	111	86	119
AXDND1	NC_040053.1	25301392	25302094	peak_2566	703	+	-0.976983232949	1.0	60.6109510086	NA|peak_10044	cds	rna-XM_027462938.1	9	25	15	2	23	0	19	15	17	5	11	24
BPNT1	NC_040048.1	3126484	3134704	peak_14280	8221	+	-0.0230962259249	1.0	60.6109510086	peak_4340|peak_4550	cds	rna-XM_027453126.1	1374	2052	1991	937	1154	926	2773	3407	2817	1760	1671	1735
LUC7L3	NC_040064.1	8718490	8725114	peak_2014	6625	-	-0.0230180247139	1.0	60.6109510086	peak_14526|peak_15197,peak_15198	cds	rna-XM_027471715.1	33281	61288	55341	21082	27294	19599	39667	48603	42877	24988	17324	19694
RPS6KC1	NC_040048.1	21710016	21710287	peak_14708	272	+	-1.02309622592	0.622022411019	249.822057759	peak_4519|peak_4734	cds	rna-XM_027453712.1	216	308	235	142	170	130	321	413	283	206	200	150
PTCHD1	NC_040046.1	88998935	88999591	peak_11112	657	-	-1.02309622592	0.622022411019	249.822057759	NA|peak_1864	cds	rna-XM_027449064.1	92	207	210	93	108	106	660	649	559	420	295	321
RHOJ	NC_040050.1	11228808	11229079	peak_6565	272	+	-0.0230962259249	1.0	60.6109510086	peak_7015|peak_7326	cds	rna-XM_005029320.4	565	990	854	485	666	392	913	1131	971	711	592	622
TRIM29	NC_040070.1	4120176	4129238	peak_18413	9063	-	-1.02309622592	0.622022411019	249.822057759	NA|peak_17310	cds	rna-XM_027444322.1	67	91	78	80	51	45	3649	3777	2715	2238	1490	1435
MARS2	NC_040055.1	6896483	6896993	peak_16567	511	-	-0.0230974879642	1.0	60.6109510086	peak_10844|peak_11317	cds	rna-XM_027464884.1	287	661	396	196	245	169	619	793	642	315	322	232
LOC101799848	NC_040051.1	21147618	21158743	peak_3248	11126	-	-1.02309622592	0.622022411019	249.822057759	peak_8581,peak_8582|peak_8986	cds	rna-XM_027460070.1	595	1130	925	519	586	415	1007	1184	1180	661	593	655
DMRT2	NC_040075.1	26380453	26380842	peak_17737	390	+	-0.0230974879642	1.0	60.6109510086	peak_17658,peak_17660|peak_18455,peak_18457	utr3	rna-XM_027446931.1	88	256	208	61	118	73	240	359	287	158	101	116
LOC101797491	NC_040059.1	15312673	15312854	peak_17305	182	+	3.0768797814	1.44172124761e-11	3.91034533003e-07	peak_12650|NA	NP_exon	rna-XR_003500439.1	7	28	82	1	6	15	5	13	7	27	9	5
CUX1	NC_040065.1	12309391	12310231	peak_4959	841	-	-0.0230962259249	1.0	60.6109510086	peak_15255|peak_15934	utr3	rna-XM_027472599.1	1144	1942	2020	884	933	819	2950	3274	2842	1659	1549	1602
GTF3C3	NC_040052.1	6009988	6013604	peak_5084	3617	+	-0.0230962259249	1.0	60.6109510086	peak_8749|peak_9143	cds	rna-XM_027461811.1	564	750	697	361	392	272	821	1113	958	552	440	430
CSPP1	NC_040047.1	121086273	121096767	peak_9307	10495	+	-0.0230962259249	1.0	60.6109510086	peak_3330|peak_3465	cds	rna-XM_027450226.1	291	590	425	191	305	179	458	556	393	322	235	165
PIRT	NC_040064.1	5753373	5753433	peak_1963	61	-	-0.0230180247139	1.0	60.6109510086	NA|peak_15184	utr3	rna-XM_005030652.4	3	9	2	3	1	2	44	39	38	15	24	16
DYNC1LI2	NC_040057.1	12087766	12088803	peak_19232	1038	-	0.0230167670511	1.0	60.6109510086	peak_11916|NA	cds	rna-XM_027466831.1	425	739	591	401	460	341	611	667	757	595	505	593
LOC101801503	NC_040072.1	4541639	4542882	peak_9919	1244	-	-0.0230974879642	1.0	60.6109510086	peak_16994|peak_17744	cds	rna-XM_027444859.1	217	385	368	127	155	112	782	1035	1065	371	338	488
CDH22	NC_040066.1	15677789	15679667	peak_6294	1879	-	-2.0232551568	0.215045056389	487.780931776	peak_15714|peak_16424	cds	rna-XM_005025596.4	96	133	106	85	76	74	125	145	165	39	50	35
VSNL1	NC_040048.1	106512234	106513314	peak_15784	1081	+	-0.0230949640235	1.0	60.6109510086	NA|peak_5269	cds	rna-XM_027455265.1	43	77	70	64	55	37	207	221	227	216	125	168
LOC113844492	NC_040054.1	12515251	12515401	peak_13886	151	-	0.561944476007	1.0	60.6109510086	peak_10424|NA	cds	rna-XM_027464561.1	34	35	46	14	17	12	37	36	82	26	12	31
ANKRD50	NC_040049.1	42257823	42258213	peak_19974	391	+	-0.0230962259249	1.0	60.6109510086	peak_6143|peak_6402,peak_6403	cds	rna-XM_005015559.4	396	948	638	338	544	307	620	904	616	473	480	409
ADSSL1	NC_040050.1	13272012	13274136	peak_6642	2125	-	0.0230167670511	1.0	60.6109510086	peak_7715|NA	cds	rna-XM_027459121.1	243	268	316	169	181	150	139	188	168	128	118	112
C2H8orf59	NC_040047.1	128853204	128856001	peak_9393	2798	-	-0.0230962259249	1.0	60.6109510086	peak_4146|peak_4342	cds	rna-XM_027452427.1	529	940	714	423	550	456	1247	1516	1297	950	744	904
GEMIN8	NC_040046.1	76523282	76523372	peak_10936	91	-	0.976903774075	1.0	60.6109510086	peak_1684|NA	utr3	rna-XM_027447851.1	94	136	113	42	90	54	159	174	191	164	79	124
LOC113842963	NC_040047.1	313264	313505	peak_7796	242	+	-0.0230180247139	1.0	60.6109510086	NA|peak_2761	cds	rna-XM_027452864.1	43	216	292	42	75	102	97	132	122	66	61	71
SCML4	NC_040048.1	71289555	71289646	peak_15426	92	+	-1.02313393453	0.130934329275	354.375992129	NA|peak_5105	utr3	rna-XM_021270191.2	4	6	5	7	16	0	19	8	19	5	17	14
FUT8	NC_040050.1	57296244	57296454	peak_7621	211	-	0.976903774075	1.0	60.6109510086	peak_8112|peak_8498	cds	rna-XM_005019242.4	269	838	471	195	345	244	328	463	356	337	223	239
BMP2K	NC_040049.1	46336561	46336622	peak_20081	62	-	-0.0230962259249	1.0	60.6109510086	NA|peak_6951	utr3	rna-XM_027456994.1	260	442	416	264	336	236	266	362	336	193	181	209
SPTAN1	NC_040063.1	8304709	8306408	peak_18895	1700	-	-0.0230962259249	1.0	60.6109510086	peak_14191|peak_14843	cds	rna-XM_027471031.1	6550	11866	10674	5771	7696	5296	6071	8233	6724	4719	4169	4315
AFAP1L2	NC_040051.1	8658999	8659060	peak_2982	62	+	-1.60821638687	0.371025736657	644.376431641	NA|peak_8608	utr5	rna-XM_027460095.1	7	17	8	13	9	4	35	36	30	13	11	9
LOC101801487	NC_040053.1	26966966	26967026	peak_2653	61	+	-0.608138189896	0.685021782428	249.71257932	NA|peak_10096	cds	rna-XM_027463113.1	14	48	42	15	25	11	35	18	14	5	2	16
TBC1D1	NC_040049.1	53216885	53219537	peak_20221	2653	-	-0.0230180247139	1.0	60.6109510086	peak_6757|peak_7019	utr3	rna-XM_027457248.1	591	1131	887	351	423	277	1372	1482	1305	730	554	642
SIPA1L2	NC_040048.1	41110099	41110249	peak_15007	151	+	-0.0231744228972	1.0	60.6109510086	NA|peak_4877	cds	rna-XM_027453266.1	131	289	90	123	219	104	118	129	133	81	75	94
CTC1	NC_040046.1	120102173	120102354	peak_11521	182	+	-0.0230962259249	1.0	60.6109510086	peak_622|peak_674	cds	rna-XM_027449665.1	360	477	429	335	281	222	345	356	353	282	145	207
FOXD1	NC_040075.1	25106130	25106616	peak_17716	487	-	-1.02325388615	0.622002253928	736.904754352	NA|peak_18914	cds	rna-XM_027446700.1	2	6	14	5	12	2	273	379	216	108	152	91
ACAN	NC_040056.1	8047965	8048205	peak_220	241	+	-0.0231744228972	1.0	60.6109510086	NA|peak_11544	cds	rna-XM_027466277.1	13	23	5	19	2	15	2173	1948	2309	1367	1112	1252
PALB2	NC_040060.1	903713	903833	peak_13074	121	+	-0.0230167670511	1.0	60.6109510086	peak_12853|peak_13441	utr3	rna-XM_027469211.1	203	365	358	188	219	204	283	335	274	189	279	206
BCO1	NC_040057.1	7569228	7569289	peak_19198	62	-	0.561944476007	1.0	60.6109510086	peak_11902|NA	utr3	rna-XM_005018267.4	23	42	46	10	20	10	15	27	8	11	7	10
PROSER2	NC_040046.1	196757463	196758002	peak_12863	540	-	-0.0230192825141	1.0	60.6109510086	peak_2569|peak_2706	utr3	rna-XM_005009647.4	176	388	352	90	122	76	690	809	895	275	211	344
BRF1	NC_040050.1	12007108	12036049	peak_6613	28942	+	-0.0230962259249	1.0	60.6109510086	peak_7046,peak_7047|peak_7366	cds	rna-XM_027459575.1	415	1016	699	395	598	281	1012	1309	1009	773	549	662
CLEC19A	NC_040060.1	8837865	8837954	peak_13386	90	+	0.976903774075	1.0	60.6109510086	peak_12996|peak_13581	utr3	rna-XM_027468962.1	1313	3040	2056	1106	1635	883	203	226	166	175	95	115
SYNM	NC_040056.1	3934670	3934911	peak_161	242	-	-0.0230962259249	1.0	60.6109510086	peak_11399|peak_11914	cds	rna-XM_027465718.1	84	134	123	48	70	58	160	200	208	108	110	93
VPS33A	NC_040061.1	12509692	12509872	peak_21014	181	-	-0.0230962259249	1.0	60.6109510086	peak_13759|peak_14400	cds	rna-XM_027470172.1	120	222	172	96	115	84	176	239	165	123	123	141
DHX57	NC_040048.1	15726362	15726663	peak_14538	302	+	0.392018216765	1.0	60.6109510086	peak_4446|peak_4656	utr5	rna-XM_027453475.1	186	405	277	101	81	46	365	348	331	131	83	149
HMCN1	NC_040053.1	21755653	21755714	peak_2489	62	+	-0.0230962259249	1.0	60.6109510086	NA|peak_10005	cds	rna-XM_027462402.1	79	202	129	92	100	80	391	583	492	308	313	415
SLC7A3	NC_040055.1	11675022	11676633	peak_16702	1612	+	-0.0230180247139	1.0	60.6109510086	peak_10707|peak_11186	utr5	rna-XM_027465142.1	183	351	282	121	135	128	691	677	624	487	331	301
SPPL2B	NC_040065.1	1897480	1899255	peak_4341	1776	-	-0.0230974879642	1.0	60.6109510086	peak_14970|peak_15643	utr3	rna-XM_027472019.1	487	988	708	390	379	266	932	1143	1143	494	423	507
BMP2K	NC_040049.1	46339912	46353189	peak_20085	13278	-	-0.0230962259249	1.0	60.6109510086	peak_6694|peak_6955	cds	rna-XM_027456992.1	1798	3384	2554	1195	1556	947	1853	2331	2082	1170	978	1039
ARID2	NC_040046.1	170631041	170631612	peak_12576	572	-	-0.0230962259249	1.0	60.6109510086	peak_2435|peak_2558	cds	rna-XM_005009952.3	364	671	523	280	412	250	410	702	526	333	322	378
ARSJ	NC_040049.1	2452957	2453226	peak_19401	270	+	-1.02309622592	0.622022411019	249.822057759	peak_5885|peak_6136	NP_exon	rna-XR_003496838.1	147	313	216	97	186	116	292	381	319	174	175	221
CMTR2	NC_040056.1	17955707	17956008	peak_569	302	-	-0.0231756891752	1.0	60.6109510086	peak_11595|peak_12111	cds	rna-XM_027466028.1	82	87	99	45	42	55	72	96	106	18	46	54
TNC	NC_040063.1	2908511	2909500	peak_18673	990	-	-0.0230974879642	1.0	60.6109510086	peak_14082,peak_14083|peak_14730	cds	rna-XM_005022360.4	348	622	1038	201	213	419	9970	9299	12086	4426	3355	4973
CNNM2	NC_040051.1	13565319	13565680	peak_3064	362	-	-0.0230180247139	1.0	60.6109510086	peak_8499|peak_8902	cds	rna-XM_027460496.1	392	716	564	329	200	261	687	704	612	398	272	279
NCOA2	NC_040047.1	122345376	122360987	peak_9325	15612	-	-0.0230962259249	1.0	60.6109510086	peak_4117|peak_4313	cds	rna-XM_027452332.1	1355	2698	2245	922	1331	904	2006	2726	2217	1333	1242	1178
TSC2	NC_040060.1	1573648	1574284	peak_13105	637	-	-1.02309622592	0.622022411019	249.822057759	peak_13125,peak_13128|peak_13723,peak_13726	utr3	rna-XM_027468927.1	332	641	483	281	384	232	513	687	506	303	327	313
ATRNL1	NC_040051.1	8301236	8301596	peak_2976	361	-	0.391938749137	1.0	60.6109510086	peak_8458|peak_8857	utr5	rna-XM_027460460.1	32	78	58	21	16	8	156	144	243	61	24	77
B4GALT6	NC_040047.1	112585706	112585767	peak_9208	62	+	0.0230217985269	1.0	60.6109510086	peak_3274|NA	utr5	rna-XM_027452181.1	99	124	137	22	18	32	74	375	93	62	48	12
MTO1	NC_040048.1	86269883	86270063	peak_15590	181	-	-0.0230167670511	1.0	60.6109510086	peak_5690|peak_5948	cds	rna-XM_027454994.1	125	216	282	132	143	184	349	374	384	278	241	295
LOC113845354	NC_040061.1	10956051	10956172	peak_20923	122	+	-0.0230167670511	1.0	60.6109510086	NA|peak_14148	cds	rna-XM_027470183.1	31	37	55	56	11	18	55	41	18	47	46	25
TMCO1	NC_040053.1	26099235	26112279	peak_2615	13045	+	-0.0230962259249	1.0	60.6109510086	peak_9652|peak_10072	cds	rna-XM_027463325.1	1675	2934	2710	1617	1914	1269	2713	3661	2958	2361	1858	1990
VPS13C	NC_040056.1	14893553	14894626	peak_479	1074	+	-1.02309622592	0.622022411019	249.822057759	NA|peak_11664	cds	rna-XM_027465720.1	43	107	73	19	75	40	73	108	95	52	37	58
SAMD12	NC_040047.1	142483574	142499742	peak_9544	16169	-	0.0230962259249	1.0	60.6109510086	peak_4227|NA	cds	rna-XM_027452637.1	32	91	121	18	31	74	111	171	61	68	75	39
JAK2	NC_040075.1	27723176	27723416	peak_17756	241	+	0.561944476007	1.0	60.6109510086	peak_17676,peak_17677|peak_18471,peak_18472	utr3	rna-XM_027447150.1	95	122	130	36	59	30	132	190	132	83	69	61
ABR	NC_040065.1	9670723	9674376	peak_4790	3654	-	-1.02309622592	0.622022411019	249.822057759	NA|peak_15868	cds	rna-XM_027472621.1	215	355	263	168	174	169	296	351	307	162	148	209
LZTS1	NC_040068.1	767951	768190	peak_1011	240	+	-1.02309622592	0.622022411019	249.822057759	peak_16083|peak_16795	cds	rna-XM_027443610.1	613	1158	846	545	582	545	623	546	341	320	248	198
HOXA2	NC_040047.1	34960953	34961283	peak_8343	331	-	-0.0230962259249	1.0	60.6109510086	peak_3687|peak_3859	cds	rna-XM_027450968.1	110	230	203	91	129	82	721	749	758	422	371	469
ANGPT1	NC_040047.1	137633652	137633892	peak_9505	241	-	0.392096426454	1.0	60.6109510086	peak_4200,peak_4201|peak_4401	utr5	rna-XM_005025881.4	8	36	18	4	5	7	33	50	54	8	24	20
AKAP12	NC_040048.1	51366320	51366861	peak_15154	542	+	-0.0230180247139	1.0	60.6109510086	peak_4720|peak_4965	cds	rna-XM_027454367.1	10852	21994	16161	7029	10451	5557	14670	21784	19045	9167	8490	9423
KIAA1147	NC_040046.1	142940985	142941855	peak_11989	871	+	-1.02309622592	0.622022411019	249.822057759	peak_779,peak_780|peak_847	NP_exon	rna-XR_003492800.1	242	513	397	214	282	198	574	728	850	333	340	358
CEP250	NC_040066.1	6246277	6246488	peak_5942	212	+	-0.0230962259249	1.0	60.6109510086	peak_15325|peak_16007	cds	rna-XM_027473011.1	89	164	154	81	100	75	108	153	166	107	80	102
LOC101791756	NC_040068.1	2139143	2139713	peak_1071	571	+	-1.02309622592	0.622022411019	249.822057759	peak_16115|peak_16827	cds	rna-XM_027443505.1	633	1219	1009	513	681	461	679	1169	973	353	551	488
EVC2	NC_040049.1	63605806	63605868	peak_20319	63	-	0.0230974879642	1.0	60.6109510086	peak_6789,peak_6791|NA	utr3	rna-XM_027457402.1	40	151	100	42	50	30	109	131	206	61	48	74
ELL2	NC_040075.1	76762111	76764835	peak_18250	2725	-	-0.0230974879642	1.0	60.6109510086	peak_18360|peak_19179	cds	rna-XM_027446433.1	227	407	356	149	157	108	620	727	554	306	227	229
IP6K2	NC_040058.1	19217814	19218318	peak_1587	505	+	-0.0230962259249	1.0	60.6109510086	peak_12152|peak_12706	utr3	rna-XM_027467522.1	339	597	446	290	296	218	647	672	714	422	321	438
LOC101791516	NC_040046.1	123514762	123515002	peak_11680	241	+	0.976981975286	1.0	60.6109510086	peak_675|peak_732	utr3	rna-XM_005012413.4	85	180	132	50	100	35	133	167	172	103	79	132
FGFR1OP	NC_040048.1	44584021	44584142	peak_15064	122	-	-1.02309622592	0.622022411019	249.822057759	NA|peak_5735	utr3	rna-XM_027454250.1	19	50	40	41	17	27	57	61	63	42	26	22
CCDC51	NC_040058.1	21716237	21718966	peak_1659	2730	+	-0.0230962259249	1.0	60.6109510086	peak_12193,peak_12194|peak_12742,peak_12743	cds	rna-XM_005025983.4	895	1527	1298	611	948	596	1426	1875	1623	885	969	1015
HTR7	NC_040051.1	17555334	17565263	peak_3182	9930	+	-0.0230962259249	1.0	60.6109510086	peak_8282|peak_8688	utr3	rna-XM_027460065.1	159	254	225	125	145	84	216	183	197	127	81	103
GRK4	NC_040049.1	66953711	66964207	peak_20382	10497	-	-0.0230192825141	1.0	60.6109510086	peak_6821|peak_7102	cds	rna-XM_027456280.1	701	1344	1061	377	359	272	1696	2080	1753	818	454	619
CACNA1G	NC_040064.1	8822822	8823003	peak_2017	182	-	-0.976903774075	1.0	60.6109510086	NA|peak_15201	cds	rna-XM_027471282.1	197	190	189	128	63	88	629	641	705	469	313	459
PITPNM2	NC_040061.1	11760252	11775475	peak_20959	15224	+	0.0230949640235	1.0	60.6109510086	peak_13532|NA	cds	rna-XM_027469735.1	76	123	114	67	105	98	96	158	126	142	101	75
PFDN4	NC_040066.1	9026958	9027832	peak_6056	875	+	0.0230167670511	1.0	60.6109510086	peak_15372|NA	cds	rna-XM_005010425.4	348	602	467	254	340	279	461	663	475	556	424	478
RFX7	NC_040057.1	1696783	1696934	peak_19096	152	+	-1.02309622592	0.622022411019	249.822057759	peak_11720|peak_12241	cds	rna-XM_027467144.1	87	159	117	49	91	69	151	130	181	93	61	94
SPTBN5	NC_040050.1	38135928	38136796	peak_7266	869	-	-0.608138189896	0.685021782428	249.71257932	NA|peak_8337	cds	rna-XM_027458500.1	2	4	0	1	2	0	44	36	31	12	12	17
SYNPO2	NC_040049.1	44293674	44293945	peak_20015	272	-	-0.0230180247139	1.0	60.6109510086	peak_6664|peak_6928	utr3	rna-XM_005013494.4	102	198	171	67	78	78	156	213	188	73	105	115
EPG5	NC_040075.1	3211025	3212777	peak_17428	1753	+	-0.0230962259249	1.0	60.6109510086	peak_17518|peak_18305	cds	rna-XM_027446357.1	96	180	109	60	104	51	185	193	203	96	78	113
CSNK2A2	NC_040056.1	19149914	19150182	peak_650	269	+	0.0230167670511	1.0	60.6109510086	peak_11243|NA	cds	rna-XM_027465708.1	808	1500	1169	873	993	757	1219	1560	1474	1173	1094	1141
ZNF770	NC_040050.1	45675223	45675404	peak_7452	182	+	-0.0230962259249	1.0	60.6109510086	peak_7441|peak_7781	utr3	rna-XM_013099100.3	67	103	92	71	52	47	78	83	72	54	32	51
ALG3	NC_040054.1	9222673	9222851	peak_13795	179	+	-0.0230180247139	1.0	60.6109510086	peak_10138|peak_10599	utr3	rna-XM_027464215.1	112	134	147	40	91	23	120	139	186	53	53	104
BBOF1	NC_040050.1	28796742	28796862	peak_6944	121	-	-1.02314213305	0.0848958369684	270.556563698	NA|peak_8216	cds	rna-XM_027459606.1	0	13	16	13	10	13	24	28	34	19	17	19
MED1	NC_040073.1	3736124	3736394	peak_3647	271	+	-0.0230167670511	1.0	60.6109510086	NA|peak_17854	utr3	rna-XM_027445646.1	315	553	634	290	376	377	704	914	673	500	622	557
TLCD2	NC_040065.1	10849953	10850283	peak_4880	331	+	-0.608139456313	0.685021649249	256.158615462	NA|peak_15559	utr3	rna-XM_027472132.1	14	88	69	12	39	25	110	122	91	59	24	18
BCL10	NC_040053.1	19404225	19404376	peak_2442	152	-	-0.976903774075	1.0	60.6109510086	NA|peak_10339	cds	rna-XM_027462839.1	159	331	209	116	158	81	391	521	389	254	244	293
MBL	NC_040051.1	26607342	26607641	peak_3330	300	+	-0.608059988685	0.685029977553	239.444841452	peak_8360|peak_8759	cds	rna-XM_027460026.1	113	388	295	90	188	82	39	68	54	22	18	19
PBRM1	NC_040058.1	17021958	17027453	peak_1516	5496	-	-0.0230962259249	1.0	60.6109510086	peak_12329|peak_12892	cds	rna-XM_027467296.1	916	1742	1634	798	1127	821	1636	2044	1701	1287	992	994
TDRP	NC_040048.1	97307193	97327223	peak_15712	20031	+	-0.0230962259249	1.0	60.6109510086	peak_4993|peak_5232	cds	rna-XM_027455149.1	156	304	193	124	201	134	966	1115	936	714	706	588
IQGAP1	NC_040056.1	52554	54621	peak_11	2068	-	-0.0230962259249	1.0	60.6109510086	peak_11330|peak_11841	cds	rna-XM_027466297.1	337	839	748	283	449	272	1164	1386	1059	718	539	709
PDS5B	NC_040046.1	22409105	22418973	peak_10374	9869	+	-0.0230180247139	1.0	60.6109510086	peak_179|peak_190	cds	rna-XM_027470111.1	6246	12386	10229	3802	5379	3686	13531	16610	12016	8212	5998	5627
FGF1	NC_040059.1	3135851	3136149	peak_16880	299	+	-0.0230962259249	1.0	60.6109510086	peak_12431|peak_13001	utr3	rna-XM_013102358.3	336	526	383	265	266	168	221	368	235	110	165	123
GAS2L1	NC_040061.1	9598216	9598336	peak_20867	121	-	1.02309622592	0.622022411019	249.822057759	peak_13692|NA	utr3	rna-XM_027469795.1	120	189	179	103	99	95	171	166	88	82	52	104
TG	NC_040047.1	148134686	148134807	peak_9606	122	+	0.0230974879642	1.0	60.6109510086	peak_3451|NA	cds	rna-XM_027450249.1	4	8	8	0	7	0	12	18	681	4	3	250
FAT4	NC_040049.1	41980487	41981027	peak_19967	541	-	-0.0230962259249	1.0	60.6109510086	peak_6643|peak_6909	cds	rna-XM_027456795.1	146	290	270	79	171	97	626	773	785	378	342	406
SNCAIP	NC_040075.1	60167302	60168187	peak_18096	886	-	-0.0230962259249	1.0	60.6109510086	peak_18281|peak_19108	cds	rna-XM_027446362.1	306	654	600	220	369	286	1185	1621	1321	814	693	766
RND3	NC_040050.1	2409933	2410650	peak_6347	718	-	-0.0230974879642	1.0	60.6109510086	peak_7602|peak_7949	utr3	rna-XM_027457890.1	1588	3186	2610	836	1190	825	3467	3850	4220	1759	1319	1530
LOC101802901	NC_040065.1	526587	526947	peak_4263	361	+	-0.0230962259249	1.0	60.6109510086	peak_14935,peak_14936,peak_14580|peak_15607,peak_15608,peak_15254	utr3	rna-XM_027472320.1	989	1719	1304	917	1043	727	277	348	340	245	205	202
BRD3	NC_040063.1	6123763	6124123	peak_18757	361	+	-0.0230962259249	1.0	60.6109510086	peak_13909|peak_14547	utr3	rna-XM_005013277.4	693	1024	762	459	593	453	1056	791	731	600	396	514
SRCIN1	NC_040073.1	4808486	4808997	peak_3733	512	+	0.561865012757	1.0	60.6109510086	peak_17164|peak_17909	cds	rna-XM_027445411.1	452	1193	630	266	384	203	179	312	326	78	115	139
ZBTB42	NC_040050.1	13122416	13123107	peak_6638	692	-	-0.0230180247139	1.0	60.6109510086	peak_7712|peak_8069,peak_8070	cds	rna-XM_027458511.1	240	407	384	171	165	111	224	282	257	112	122	110
ITPK1	NC_040050.1	20436784	20437324	peak_6776	541	+	-0.0230962259249	1.0	60.6109510086	peak_7119|peak_7444	utr3	rna-XM_027459636.1	469	1123	817	371	592	318	697	874	659	434	373	435
GFRA4	NC_040049.1	74265205	74265625	peak_20511	421	-	-0.0230974879642	1.0	60.6109510086	peak_6885|peak_7177	utr3	rna-XM_005010136.4	119	270	192	78	112	75	520	410	522	227	154	251
CCDC78	NC_040060.1	12397064	12399251	peak_13515	2188	-	-0.0230962259249	1.0	60.6109510086	NA|peak_13931	cds	rna-XM_027469388.1	43	59	65	24	83	26	45	33	91	30	43	29
GARNL3	NC_040063.1	11761511	11762022	peak_19044	512	-	0.561865012757	1.0	60.6109510086	peak_14246|peak_14904	utr5	rna-XM_027470976.1	978	1985	1568	518	761	391	1620	2109	1636	1019	601	637
RELN	NC_040046.1	189935532	189940406	peak_12785	4875	+	-0.660548216594	0.303890189737	599.674847979	NA|peak_1219	cds	rna-XM_027459414.1	22	35	37	44	37	34	35	60	45	34	24	52
KCNN3	NC_040071.1	41840	41991	peak_831	152	-	-0.0230167670511	1.0	60.6109510086	peak_16693|peak_17447	NP_exon	rna-XR_003492523.1	335	529	437	372	336	246	668	709	564	546	460	396
B3GALT1	NC_040052.1	24314366	24469363	peak_5516	154998	-	-0.0230949640235	1.0	60.6109510086	peak_9310|peak_9712	utr5	rna-XM_027461888.1	2464	3530	3663	2868	2994	2416	2576	2494	1902	2836	1752	1624
COL27A1	NC_040063.1	5233973	5234303	peak_18711	331	+	-0.0230180247139	1.0	60.6109510086	peak_13893|peak_14532	utr3	rna-XM_027470676.1	139	228	229	105	96	70	1120	993	1091	578	347	528
NUAK1	NC_040046.1	146345565	146346194	peak_12052	630	-	-0.0230962259249	1.0	60.6109510086	peak_2225|peak_2346	cds	rna-XM_027449660.1	330	528	399	247	286	157	564	654	674	326	302	373
PSPC1	NC_040046.1	17473564	17473744	peak_10281	181	-	-0.0230962259249	1.0	60.6109510086	peak_1358|peak_1440	NP_exon	rna-XR_003500603.1	148	197	240	126	137	105	141	182	197	121	80	111
ZNF598	NC_040060.1	1678690	1678781	peak_13115	92	+	0.0231744228972	1.0	60.6109510086	peak_12870|NA	utr3	rna-XM_027468848.1	58	166	80	107	112	66	157	234	156	178	144	68
TTI2	NC_040068.1	802477	802717	peak_1017	241	-	-0.0230962259249	1.0	60.6109510086	peak_16144|peak_16852	utr5	rna-XM_027443607.1	58	135	98	67	45	34	104	104	91	64	37	59
GATA3	NC_040046.1	198573942	198574331	peak_12872	390	-	-0.0230180247139	1.0	60.6109510086	peak_2572|peak_2710	cds	rna-XM_027460791.1	34	54	63	19	27	20	1329	1021	781	815	404	335
MAP4K4	NC_040046.1	64880597	64880958	peak_10777	362	-	-0.0230962259249	1.0	60.6109510086	peak_1613|peak_1711	utr3	rna-XM_027445829.1	3497	6209	5566	2400	3279	2220	6153	7847	5902	4363	3644	3018
FOXRED1	NC_040070.1	415346	415554	peak_18318	209	-	-0.0230962259249	1.0	60.6109510086	peak_16522,peak_16523|peak_17260,peak_17261	utr3	rna-XM_027444424.1	733	1109	865	621	663	509	1351	1294	1449	923	899	856
HOXB8	NC_040073.1	5061671	5063056	peak_3756	1386	-	-0.0230974879642	1.0	60.6109510086	peak_17324|peak_18100	cds	rna-XM_005026155.4	248	827	559	150	353	174	818	1315	722	461	471	288
WASHC2C	NC_040051.1	19870394	19872949	peak_3224	2556	+	-0.0230962259249	1.0	60.6109510086	peak_8304|peak_8709	cds	rna-XM_027460766.1	689	1448	1212	602	905	560	1088	1483	1076	823	647	727
RAD21	NC_040047.1	141847831	141847951	peak_9535	121	-	-0.0230180247139	1.0	60.6109510086	peak_4222|peak_4421	utr5	rna-XM_027452630.1	233	605	465	228	210	173	566	604	515	407	288	271
LOC101792010	NC_040047.1	154885986	154886315	peak_9654	330	+	-0.0230962259249	1.0	60.6109510086	peak_3459|peak_3614	cds	rna-XM_027450257.1	437	1227	725	523	726	401	1241	1744	1541	1141	908	1117
ANAPC4	NC_040049.1	57499382	57500159	peak_20245	778	-	-0.0230962259249	1.0	60.6109510086	peak_6767|peak_7034	utr3	rna-XM_027457300.1	424	845	868	362	416	344	1122	1464	1346	754	618	744
DACT1	NC_040050.1	9460005	9460694	peak_6540	690	+	-0.0230962259249	1.0	60.6109510086	peak_7001|peak_7313	cds	rna-XM_027458384.1	1090	2733	2055	835	1428	1001	3421	3975	4942	2100	1960	2670
PHLPP2	NC_040056.1	21761794	21762413	peak_805	620	+	-0.0230962259249	1.0	60.6109510086	peak_11320|peak_11830	cds	rna-XM_027466395.1	119	304	164	92	122	81	232	263	245	116	106	173
POLD3	NC_040046.1	1095414	1095745	peak_10060	332	+	-0.0230962259249	1.0	60.6109510086	NA|peak_49	utr3	rna-XM_027462151.1	119	250	157	97	143	137	219	250	324	138	149	192
TMEM39A	NC_040046.1	118945925	118946075	peak_11479	151	+	-0.0230949640235	1.0	60.6109510086	NA|peak_657	cds	rna-XM_021270727.2	68	130	100	102	78	81	114	166	155	124	95	94
ADGRB1	NC_040047.1	154039391	154039572	peak_9644	182	+	-1.02317568918	0.622012251195	633.83074332	NA|peak_3611	utr3	rna-XM_027452768.1	9	22	25	14	10	21	36	44	33	17	11	20
PALD1	NC_040051.1	32385997	32386209	peak_3419	213	+	-0.0230167670511	1.0	60.6109510086	peak_8407|peak_8803	cds	rna-XM_027460373.1	760	1571	1277	808	1030	918	1107	1380	1361	872	950	1090
ZFP64	NC_040066.1	8273035	8273276	peak_6041	242	-	-0.0230962259249	1.0	60.6109510086	peak_15617|peak_16318	cds	rna-XM_027472943.1	53	73	53	32	33	20	65	115	110	37	36	64
KCNV2	NC_040075.1	26935683	26935864	peak_17744	182	+	1.56210214033	0.625027232164	248.678422516	peak_17668|NA	cds	rna-XM_027446707.1	10	13	22	4	7	2	6	8	3	3	4	10
TRAPPC10	NC_040046.1	80798963	80799144	peak_11029	182	+	0.976903774075	1.0	60.6109510086	peak_439|peak_463	utr5	rna-XM_027448838.1	141	288	265	181	85	118	220	240	254	195	107	150
LOC101790225	NC_040049.1	25968296	25968416	peak_19773	121	+	-0.0230962259249	1.0	60.6109510086	NA|peak_6322	utr3	rna-XM_027456220.1	131	135	123	73	76	49	190	230	214	97	97	107
ROBO2	NC_040046.1	102905378	102905588	peak_11274	211	+	0.976903774075	1.0	60.6109510086	peak_546|peak_576	utr3	rna-XM_027449315.1	53	110	72	15	48	61	222	295	200	203	180	131
SLC39A3	NC_040065.1	4456959	4458035	peak_4513	1077	-	-0.0230962259249	1.0	60.6109510086	peak_15039|peak_15716,peak_15717	utr3	rna-XM_027471838.1	755	1243	1268	626	690	647	923	897	866	561	497	553
SH3TC2	NC_040059.1	12579884	12580215	peak_17187	332	-	0.976980717486	0.687534862081	234.909806279	peak_12792|peak_13371	utr3	rna-XM_027468527.1	22	34	48	4	6	19	75	76	124	60	19	33
MFNG	NC_040046.1	149079060	149079181	peak_12115	122	-	0.438139904096	0.520363249988	654.184626482	peak_2255|NA	utr3	rna-XM_027450291.1	9	11	40	14	33	24	55	29	10	13	38	37
AVEN	NC_040050.1	43350349	43372474	peak_7425	22126	+	-0.0230962259249	1.0	60.6109510086	peak_7425|peak_7768	cds	rna-XM_027458849.1	660	1060	980	483	465	433	1881	1962	1692	1186	913	817
LOC101797491	NC_040059.1	15308532	15308593	peak_17304	62	+	3.43658839767	2.33321082397e-07	0.00401933249446	peak_12649|NA	NP_exon	rna-XR_003500439.1	8	6	63	1	15	10	0	8	3	27	3	5
SPPL3	NC_040061.1	7175860	7176011	peak_20780	152	+	-0.0230962259249	1.0	60.6109510086	peak_13461|peak_14091	cds	rna-XM_027470106.1	132	230	172	142	121	116	282	274	294	230	100	211
ISLR	NC_040056.1	12706747	12706927	peak_391	181	-	-0.0230167670511	1.0	60.6109510086	NA|peak_12036	utr3	rna-XM_027466312.1	151	347	416	139	248	251	1151	1004	944	872	651	902
LMOD3	NC_040058.1	5269542	5270039	peak_1304	498	+	-0.0230180247139	1.0	60.6109510086	peak_12020|peak_12566	cds	rna-XM_027467848.1	4581	8911	7640	2721	3646	2671	1766	1948	2041	1112	657	884
CHD9	NC_040057.1	18905346	18918483	peak_19342	13138	+	-0.0230962259249	1.0	60.6109510086	peak_11830,peak_11831|peak_12363	cds	rna-XM_027467012.1	498	1088	846	468	675	397	884	1260	1088	836	553	636
HAPLN1	NC_040075.1	71951202	71951352	peak_18231	151	-	-0.0230962259249	1.0	60.6109510086	NA|peak_19168	utr3	rna-XM_027446782.1	25	37	33	17	20	20	951	750	806	615	432	530
CEP162	NC_040048.1	81905027	81905238	peak_15544	212	+	0.976903774075	1.0	60.6109510086	peak_4923|peak_5159	cds	rna-XM_027454939.1	43	110	102	50	42	49	126	166	113	101	84	66
TXLNB	NC_040048.1	56914738	56914918	peak_15245	181	+	0.976983232949	1.0	60.6109510086	peak_4775|NA	utr3	rna-XM_005017749.4	24	35	43	23	20	10	5	9	7	6	7	4
MPDZ	NC_040075.1	31438582	31440921	peak_17779	2340	+	-0.0231744228972	1.0	60.6109510086	peak_17695|peak_18487	cds	rna-XM_027446716.1	327	455	421	359	377	250	233	373	258	201	173	144
ITPRIPL2	NC_040060.1	8776558	8776649	peak_13382	92	+	0.976981975286	1.0	60.6109510086	peak_12992|NA	cds	rna-XM_021271599.2	31	74	50	16	43	10	31	48	48	16	21	37
ANAPC2	NC_040063.1	1896511	1897504	peak_18638	994	+	0.976903774075	1.0	60.6109510086	peak_13852|peak_14491	cds	rna-XM_027470949.1	1727	3041	2865	1316	1462	1183	3326	3549	3291	2359	1756	1864
BEGAIN	NC_040050.1	16411272	16411660	peak_6700	389	+	-0.608059988685	0.685029977553	239.444841452	peak_7087|peak_7402	cds	rna-XM_027457761.1	67	88	129	35	71	22	43	83	36	18	32	7
B4GALNT4	NC_040050.1	35771063	35771303	peak_7149	241	-	-0.0230962259249	1.0	60.6109510086	peak_7940|peak_8301	cds	rna-XM_027458364.1	151	231	211	156	97	78	626	621	639	325	290	302
CSGALNACT2	NC_040051.1	26315974	26316333	peak_3327	360	+	-0.0230962259249	1.0	60.6109510086	peak_8359|peak_8758	utr3	rna-XM_027460016.1	149	263	273	119	134	86	337	407	319	197	179	193
PTP4A3	NC_040047.1	152540735	152540944	peak_9639	210	-	-0.0230962259249	1.0	60.6109510086	peak_4282|peak_4487	utr5	rna-XM_005016693.4	403	819	722	423	500	413	654	786	767	425	479	477
ABI2	NC_040052.1	18301599	18302911	peak_5330	1313	-	-0.0230962259249	1.0	60.6109510086	peak_9260|peak_9652	utr3	rna-XM_027461113.1	397	850	730	402	552	321	656	858	730	492	462	487
ADAMTS2	NC_040059.1	6983155	7098886	peak_16994	115732	-	-0.0230167670511	1.0	60.6109510086	peak_12710|peak_13288	cds	rna-XM_027468533.1	481	983	905	493	580	439	777	822	803	772	496	697
TMEFF1	NC_040047.1	93143986	93149425	peak_8950	5440	+	0.976983232949	1.0	60.6109510086	peak_3154|NA	cds	rna-XM_027451841.1	24	40	84	15	29	28	51	106	58	60	63	38
C4H4orf45	NC_040049.1	29496546	29498291	peak_19814	1746	-	-0.0230180247139	1.0	60.6109510086	peak_6558|peak_6830	utr3	rna-XM_013096650.3	694	1264	974	473	589	323	733	1081	978	438	448	483
TMEM196	NC_040047.1	32043733	32043943	peak_8307	211	-	-1.02317568918	0.622012251195	633.83074332	NA|peak_3840	cds	rna-XM_005015157.4	6	11	4	2	7	8	53	66	93	37	24	26
CFAP43	NC_040051.1	12505480	12506015	peak_3032	536	+	0.0230962259249	1.0	60.6109510086	peak_8228|NA	cds	rna-XM_027459882.1	17	38	40	19	39	10	52	47	65	34	25	55
SERPINE2	NC_040054.1	21644964	21646256	peak_14141	1293	-	-0.0230962259249	1.0	60.6109510086	NA|peak_11010	cds	rna-XM_013105920.2	577	1206	1346	626	912	767	1782	2050	2130	1366	1243	1561
NCOA5	NC_040066.1	15621667	15625180	peak_6292	3514	-	-0.0230962259249	1.0	60.6109510086	peak_15713|peak_16423	cds	rna-XM_027442949.1	1145	2164	1851	1053	1206	940	2476	2994	2617	1684	1438	1619
POLDIP3	NC_040046.1	160291091	160291362	peak_12408	272	+	-0.0230962259249	1.0	60.6109510086	peak_981|peak_1063	utr3	rna-XM_027453618.1	757	1463	1190	713	911	626	1423	1631	1553	939	786	997
TP53BP1	NC_040056.1	103164	103345	peak_15	182	-	-0.0230962259249	1.0	60.6109510086	peak_11334|peak_11845	cds	rna-XM_027466295.1	245	486	335	187	322	188	645	702	580	485	433	410
SYNE3	NC_040050.1	19193439	19198675	peak_6745	5237	+	0.0230962259249	1.0	60.6109510086	peak_7099|NA	cds	rna-XM_027459384.1	337	452	480	302	293	275	361	315	371	247	216	264
NFKBIE	NC_040048.1	32767367	32767637	peak_14895	271	-	-0.0230962259249	1.0	60.6109510086	NA|peak_5644	utr3	rna-XM_027454007.1	500	600	347	181	255	289	573	579	549	255	236	318
CUEDC1	NC_040065.1	6822803	6823463	peak_4642	661	-	-1.02309622592	0.622022411019	249.822057759	NA|peak_15773	utr5	rna-XM_027472022.1	358	804	656	424	494	348	323	569	607	181	269	325
LOC101801190	NC_040047.1	20749950	20751777	peak_8172	1828	-	-0.0230962259249	1.0	60.6109510086	peak_3640|peak_3791	cds	rna-XM_005013176.4	118	188	150	105	102	88	111	145	120	86	79	60
PSMB2	NC_040069.1	1199105	1201041	peak_3981	1937	-	-0.0230180247139	1.0	60.6109510086	peak_16317|peak_17054	cds	rna-XM_027443819.1	2657	5546	4120	1924	2204	1658	5455	6114	6421	3419	2498	3306
SYAP1	NC_040046.1	77906826	77906917	peak_10953	92	+	1.02309622592	0.622022411019	249.822057759	peak_412,peak_410|NA	utr3	rna-XM_027448010.1	33	68	57	36	40	23	70	80	66	43	27	42
SYT9	NC_040050.1	63502768	63503038	peak_7744	271	+	-0.0230180247139	1.0	60.6109510086	peak_7581|peak_7926	cds	rna-XM_027458407.1	57	241	107	27	95	37	242	283	307	109	144	157
HMGA2	NC_040046.1	167040185	167040276	peak_12537	92	-	1.13860307999	0.112621714916	340.20552049	peak_2417|NA	utr3	rna-XM_027456241.1	7	14	565	271	411	283	15	2680	33	20	820	1566
PRDM15	NC_040046.1	79658625	79659136	peak_10995	512	-	-0.0231756891752	1.0	60.6109510086	peak_1707|peak_1814	cds	rna-XM_021276632.2	366	656	510	267	268	210	595	682	649	256	270	291
ZFAND4	NC_040051.1	19901648	19901947	peak_3226	300	+	-0.0230180247139	1.0	60.6109510086	peak_8307|peak_8711	cds	rna-XM_027460769.1	98	229	145	55	89	65	194	188	190	124	48	114
APOLD1	NC_040046.1	159287373	159287463	peak_12380	91	+	0.0230192825141	1.0	60.6109510086	peak_959|NA	utr3	rna-XM_005012176.4	15	27	30	5	9	8	14	24	26	7	7	9
PTX3	NC_040054.1	1581863	1582430	peak_13670	568	+	0.976903774075	1.0	60.6109510086	peak_10087|peak_10543	utr3	rna-XM_005027559.4	257	493	377	172	247	169	1593	1645	1806	1155	834	1114
ZMYM2	NC_040046.1	17604085	17604655	peak_10286	571	+	-0.0230180247139	1.0	60.6109510086	peak_158|peak_156,peak_157	cds	rna-XM_021268931.2	162	265	255	114	118	68	248	398	229	163	108	130
KLF7	NC_040052.1	16964175	16964386	peak_5294	212	+	0.0230962259249	1.0	60.6109510086	peak_8853|NA	utr3	rna-XM_027461150.1	65	90	82	42	46	61	54	49	69	46	38	26
EPB41L2	NC_040048.1	60711784	60716017	peak_15302	4234	+	-0.0230962259249	1.0	60.6109510086	peak_4808|peak_5059	cds	rna-XM_027454517.1	916	1813	1456	805	1272	752	1016	1409	1086	819	673	805
TK2	NC_040057.1	11976444	11976504	peak_19226	61	-	-0.0230167670511	1.0	60.6109510086	NA|peak_12455	utr3	rna-XM_027466762.1	54	69	61	29	49	33	112	108	114	86	61	106
TUBGCP3	NC_040046.1	60692598	60693441	peak_10689	844	-	-0.0230962259249	1.0	60.6109510086	peak_1548|peak_1653	cds	rna-XM_027472681.1	284	515	420	230	331	226	587	660	667	458	392	436
SH3RF3	NC_040046.1	61845681	61853243	peak_10731	7563	-	-0.0230180247139	1.0	60.6109510086	peak_1572|peak_1674	cds	rna-XM_027444954.1	1174	3126	2176	788	1297	871	2800	4317	3199	1658	1934	1583
L3MBTL2	NC_040046.1	150531243	150531393	peak_12240	151	+	-0.0230962259249	1.0	60.6109510086	peak_908|peak_980	cds	rna-XM_027455304.1	240	523	330	227	310	184	465	443	470	339	227	340
TBC1D31	NC_040047.1	144255235	144259561	peak_9565	4327	+	-0.0230962259249	1.0	60.6109510086	peak_3435|peak_3587	NP_exon	rna-XR_003495829.1	1311	2049	1850	979	1081	840	1961	2674	1842	1359	1020	1050
FBXO21	NC_040061.1	9427208	9427537	peak_20862	330	-	-0.0230962259249	1.0	60.6109510086	peak_13689|peak_14331	utr3	rna-XM_027469797.1	150	550	240	195	170	150	318	353	262	170	185	180
CDC27	NC_040073.1	2651295	2652443	peak_3586	1149	+	-0.0230962259249	1.0	60.6109510086	peak_17080|peak_17825	utr3	rna-XM_027445270.1	240	452	318	187	236	214	403	473	452	328	292	313
NEDD1	NC_040046.1	157031454	157032456	peak_12333	1003	+	-0.0230962259249	1.0	60.6109510086	peak_931|peak_1011	utr3	rna-XM_027452364.1	182	363	288	158	185	145	285	271	267	186	156	148
GTF2H2	NC_040075.1	62915244	62916607	peak_18117	1364	+	-0.0230962259249	1.0	60.6109510086	peak_17846|peak_18654	cds	rna-XM_027446321.1	400	744	592	354	498	331	825	997	939	604	654	714
CHRNA4	NC_040066.1	13592308	13592398	peak_6151	91	-	-1.56202393488	0.625027557488	245.460899709	NA|peak_16362	utr3	rna-XM_027473312.1	62	84	95	40	31	10	27	35	12	24	26	20
SETX	NC_040063.1	6885677	6885947	peak_18797	271	+	-1.02309622592	0.622022411019	249.822057759	peak_13936|peak_14575	cds	rna-XM_027471115.1	181	186	122	102	130	98	159	253	226	100	101	100
NAIF1	NC_040063.1	5295994	5296624	peak_18717	631	-	-0.0230962259249	1.0	60.6109510086	peak_14100|peak_14750	utr3	rna-XM_027471061.1	418	965	676	384	431	339	977	1147	928	455	572	552
NUDT3	NC_040072.1	5281782	5282172	peak_9974	391	+	-0.0230974879642	1.0	60.6109510086	peak_16888|peak_17636	utr3	rna-XM_027444698.1	1622	2779	2312	1023	1226	916	1009	1359	991	533	488	410
DEPDC1	NC_040053.1	5694131	5694370	peak_2161	240	+	0.976983232949	1.0	60.6109510086	peak_9443|NA	cds	rna-XM_027463229.1	34	77	89	25	51	31	134	127	33	111	111	69
ADD3	NC_040051.1	10831056	10831146	peak_3022	91	-	0.0230962259249	1.0	60.6109510086	peak_8483|NA	utr5	rna-XM_027460910.1	214	425	337	206	307	170	361	566	481	380	275	345
ACKR4	NC_040047.1	44842655	44842716	peak_8503	62	+	-0.0230962259249	1.0	60.6109510086	peak_2949|peak_3073	cds	rna-XM_027450162.1	89	133	148	57	111	91	87	140	82	80	55	73
DAB2IP	NC_040063.1	9410437	9415632	peak_18968	5196	-	-0.976903774075	1.0	60.6109510086	NA|peak_14867	utr5	rna-XM_027470777.1	29	79	60	17	33	30	178	149	108	127	85	41
FNIP2	NC_040049.1	29504675	29505246	peak_19816	572	-	-0.0230962259249	1.0	60.6109510086	peak_6560|peak_6832	cds	rna-XM_005016561.4	1131	2125	1704	756	924	687	1410	2062	1772	873	848	783
MAP3K6	NC_040069.1	3048066	3048187	peak_4082	122	-	-0.0231744228972	1.0	60.6109510086	NA|peak_17106	utr3	rna-XM_027443930.1	7	62	53	47	38	46	21	68	26	37	32	13
POU3F1	NC_040069.1	2276927	2277167	peak_4033	241	-	-0.561944476007	1.0	60.6109510086	NA|peak_17087	cds	rna-XM_027444010.1	51	53	67	30	25	8	372	273	306	172	149	123
DDHD1	NC_040050.1	7569846	7569997	peak_6484	152	-	-0.0230962259249	1.0	60.6109510086	NA|peak_8023	utr3	rna-XM_027458073.1	36	59	99	35	58	34	151	165	138	102	102	92
SELENOI	NC_040048.1	116996129	116996310	peak_15953	182	-	0.0230962259249	1.0	60.6109510086	peak_5866|NA	utr3	rna-XM_027455502.1	147	257	197	116	166	113	230	205	253	214	89	170
FAM78A	NC_040063.1	7312682	7313221	peak_18824	540	+	0.976903774075	1.0	60.6109510086	peak_13946|peak_14587	utr3	rna-XM_005013235.4	1105	2108	1779	809	1113	863	1061	1371	912	888	644	569
HSPB2	NC_040070.1	7458884	7460121	peak_18542	1238	-	-0.0230962259249	1.0	60.6109510086	peak_16628|peak_17378	cds	rna-XM_005030872.4	929	1853	1460	740	927	747	785	871	791	524	485	388
DIO2	NC_040050.1	25627189	25627788	peak_6864	600	+	-0.0230962259249	1.0	60.6109510086	peak_7165,peak_7166|peak_7495	utr3	rna-XM_005013892.4	188	375	211	145	169	107	610	812	669	390	400	406
ZNF648	NC_040053.1	25879385	25879805	peak_2603	421	+	-0.0230962259249	1.0	60.6109510086	peak_9649|peak_10069	cds	rna-XM_021279082.2	318	621	519	273	396	292	640	729	802	387	435	539
TRMT10A	NC_040049.1	7232638	7232848	peak_19508	211	+	-0.0230962259249	1.0	60.6109510086	peak_5945|peak_6206	utr3	rna-XM_027456204.1	253	460	341	198	364	231	293	383	315	211	193	234
GJB3	NC_040069.1	975602	975723	peak_3962	122	+	-2.68642501103	5.33113107497e-10	1.35919268202e-05	NA|peak_16910	utr3	rna-XM_005025368.4	16	2	5	12	3	14	37	56	70	21	7	5
EBNA1BP2	NC_040053.1	15883535	15886041	peak_2395	2507	+	-0.0230962259249	1.0	60.6109510086	peak_9547|peak_9951	cds	rna-XM_027462744.1	1773	3001	2493	1432	1879	1286	2868	3566	3430	2426	1790	2248
ZBTB47	NC_040047.1	2786133	2787093	peak_7911	961	-	-0.0230974879642	1.0	60.6109510086	peak_3500|peak_3657	cds	rna-XM_027450324.1	1814	3069	2812	1049	1050	930	3967	4212	4484	1994	1309	1666
CDAN1	NC_040050.1	38825698	38825759	peak_7296	62	-	-1.02309622592	0.622022411019	249.822057759	NA|peak_8353	cds	rna-XM_027458591.1	63	91	55	36	55	42	66	51	60	24	36	24
TC2N	NC_040050.1	20939399	20939549	peak_6798	151	+	2.60845480288	0.0681542212782	231.682464146	peak_7130|NA	utr3	rna-XM_027457660.1	6	5	9	0	0	0	12	16	15	2	3	3
CSGALNACT1	NC_040049.1	16437170	16437739	peak_19652	570	-	-0.0230974879642	1.0	60.6109510086	peak_6482|peak_6751	utr3	rna-XM_027456118.1	177	459	407	90	194	145	949	1065	1103	372	404	523
MAP7	NC_040048.1	58079149	58083302	peak_15267	4154	+	0.562022681457	1.0	60.6109510086	peak_4789|peak_5032	cds	rna-XM_021279143.2	75	156	231	44	32	71	1188	1469	1137	779	486	430
TNRC6A	NC_040060.1	931702	934375	peak_13077	2674	-	0.0230167670511	1.0	60.6109510086	peak_13111|NA	cds	rna-XM_027469216.1	399	632	514	404	452	288	357	502	532	355	348	428
PIK3R1	NC_040075.1	22103056	22103869	peak_17642	814	+	-1.02309622592	0.622022411019	249.822057759	peak_17625|peak_18413	utr3	rna-XM_027446161.1	321	660	599	233	399	275	1095	1506	1185	734	592	638
DAB2IP	NC_040063.1	9625296	9625357	peak_18974	62	+	-0.0231744228972	1.0	60.6109510086	NA|peak_14655	utr3	rna-XM_027470776.1	61	118	95	91	110	68	88	102	81	43	51	75
RPS6KA2	NC_040048.1	44944362	44944782	peak_15068	421	+	-0.608059988685	0.685029977553	239.444841452	peak_4676|peak_4908	utr3	rna-XM_021272261.2	125	242	166	62	68	73	182	255	204	73	82	54
RGS3	NC_040063.1	1427816	1428261	peak_18607	446	-	-0.0230962259249	1.0	60.6109510086	peak_14067|peak_14714	utr3	rna-XM_021274352.2	664	1470	1152	495	679	532	1623	2110	2138	918	932	1051
RBBP7	NC_040046.1	77951522	77951613	peak_10957	92	-	0.0230962259249	1.0	60.6109510086	peak_1689|NA	utr5	rna-XM_027448019.1	193	444	351	184	213	199	524	620	562	394	321	429
EDNRA	NC_040049.1	34100528	34103577	peak_19882	3050	-	-0.0230962259249	1.0	60.6109510086	peak_6592|peak_6863	cds	rna-XM_005014682.4	586	1249	1228	493	662	529	1841	2021	1749	1210	946	1042
ATP7A	NC_040055.1	5057826	5058142	peak_16495	317	+	-0.0230962259249	1.0	60.6109510086	peak_10627|peak_11101	utr5	rna-XM_027465056.1	117	181	126	95	69	47	188	160	135	118	73	58
NR2F2	NC_040056.1	5045728	5045997	peak_177	270	-	-0.0230167670511	1.0	60.6109510086	peak_11406|peak_11923	utr3	rna-XM_005011108.4	1421	2668	2241	1312	1837	1296	1959	2930	2245	1826	1664	1670
KLF2	NC_040065.1	3153922	3154071	peak_4398	150	+	0.0230962259249	1.0	60.6109510086	peak_14645|NA	cds	rna-XM_027472014.1	398	886	639	374	567	287	491	292	501	405	155	336
MGA	NC_040050.1	37846455	37846666	peak_7245	212	+	0.0230962259249	1.0	60.6109510086	peak_7351|NA	cds	rna-XM_027457476.1	108	203	159	87	121	83	131	230	255	122	139	150
LOC106020099	NC_040046.1	150197808	150197929	peak_12217	122	-	-0.0230949640235	1.0	60.6109510086	NA|peak_2407	cds	rna-XM_013108674.3	755	1056	1143	877	1062	844	615	749	665	676	584	705
CAMSAP1	NC_040063.1	9116644	9116914	peak_18949	271	+	-0.0230962259249	1.0	60.6109510086	peak_13998|peak_14638	cds	rna-XM_021276365.2	130	213	209	74	120	97	188	257	218	103	101	134
TENM2	NC_040059.1	17240841	17241111	peak_17333	271	-	-0.0230974879642	1.0	60.6109510086	peak_12840|peak_13428	cds	rna-XM_027468687.1	54	85	88	27	33	18	50	59	54	16	14	29
TNFAIP8L3	NC_040057.1	5125209	5125359	peak_19168	151	+	-1.6081381899	0.371038958738	572.626096768	NA|peak_12285	cds	rna-XM_027466912.1	6	31	14	10	12	11	73	27	34	22	10	13
ADAMTS5	NC_040046.1	96579551	96579761	peak_11238	211	+	-0.0230167670511	1.0	60.6109510086	NA|peak_554	utr5	rna-XM_027454644.1	65	154	133	52	127	45	170	192	158	170	99	143
DNAJC2	NC_040046.1	190005412	190011125	peak_12788	5714	+	-0.0230180247139	1.0	60.6109510086	peak_1146|peak_1220	cds	rna-XM_027459467.1	5020	9977	8434	2924	4251	2962	11853	16273	13444	7976	5464	5899
MANSC1	NC_040046.1	133092277	133092966	peak_11825	690	-	-0.0230962259249	1.0	60.6109510086	peak_2104|peak_2226	utr3	rna-XM_005010036.4	174	281	284	114	143	102	362	457	363	229	167	223
FOXM1	NC_040046.1	123333100	123333611	peak_11663	512	+	-0.0230962259249	1.0	60.6109510086	peak_669|peak_727	utr3	rna-XM_027449843.1	99	201	131	69	94	57	241	298	304	110	135	145
58eb1e83-42be-4a22-8429-1cf7a4470d49	NC_040065.1	11540063	11540363	peak_4927	301	+	0.976981975286	1.0	60.6109510086	peak_14909,peak_14912|peak_15584,peak_15586	NP_exon	58eb1e83-42be-4a22-8429-1cf7a4470d49.trans	68	90	139	57	39	24	43	70	93	46	36	48
NRP1	NC_040047.1	14624666	14624967	peak_8065	302	+	-0.0230974879642	1.0	60.6109510086	peak_2768|peak_2895	utr5	rna-XM_027450532.1	1849	3933	3107	1293	1360	1218	2682	3240	2925	1482	1149	1264
RRP8	NC_040046.1	703329	704354	peak_10043	1026	+	-0.0230962259249	1.0	60.6109510086	peak_40|peak_39	cds	rna-XM_005029844.3	1153	2233	1663	911	883	847	1407	1556	1812	972	676	1034
PES1	NC_040061.1	9955525	9956150	peak_20899	626	-	0.976903774075	1.0	60.6109510086	peak_13709|peak_14353	cds	rna-XM_027470013.1	1753	2888	2513	1233	1437	1165	2860	3817	3263	2103	1891	2101
PPARGC1B	NC_040055.1	674076	674347	peak_16370	272	-	-1.02309622592	0.622022411019	249.822057759	peak_10755|peak_11231	utr3	rna-XM_027465501.1	63	109	98	54	61	45	122	150	152	73	72	86
RSF1	NC_040046.1	3187002	3189596	peak_10135	2595	-	-0.0230962259249	1.0	60.6109510086	peak_1286|peak_1372	cds	rna-XM_027466716.1	1123	1997	1610	799	1056	673	1862	1881	1919	1333	800	1051
DMP1	NC_040049.1	45333964	45334143	peak_20064	180	+	0.976980717486	0.687534862081	234.909806279	peak_6183|NA	cds	rna-XM_005012780.4	14	51	47	7	13	11	810	81	757	399	38	268
NASP	NC_040053.1	14155034	14156723	peak_2338	1690	-	-0.0230962259249	1.0	60.6109510086	peak_9856|peak_10290	cds	rna-XM_027463196.1	1790	3346	2755	1487	1977	1382	4109	5576	4448	3446	2944	2896
TBPL1	NC_040048.1	59241181	59244048	peak_15288	2868	-	-0.0230167670511	1.0	60.6109510086	peak_5558|peak_5807	utr3	rna-XM_027454494.1	121	270	250	148	174	155	292	354	250	239	221	221
TTN	NC_040052.1	20211223	20211494	peak_5425	272	+	-0.0230962259249	1.0	60.6109510086	peak_8947|peak_9334	cds	rna-XM_027461598.1	20257	27282	27038	16573	16663	12503	6068	9791	7204	4970	4877	4467
UHRF1BP1	NC_040072.1	5143784	5144175	peak_9963	392	-	-0.0230962259249	1.0	60.6109510086	peak_17016|peak_17769	cds	rna-XM_027444886.1	615	1035	857	604	692	378	571	671	566	448	422	310
LRRC49	NC_040057.1	61047	68334	peak_19056	7288	+	-0.0231744228972	1.0	60.6109510086	NA|peak_12221	cds	rna-XM_027467122.1	60	98	90	56	93	64	124	174	172	125	116	68
KLF12	NC_040046.1	41551899	41552080	peak_10551	182	-	-0.0230962259249	1.0	60.6109510086	peak_1479|peak_1580	utr3	rna-XM_027473013.1	273	494	400	251	288	245	586	756	654	449	399	514
ZNF385C	NC_040073.1	3027104	3027165	peak_3602	62	+	-0.976981975286	1.0	60.6109510086	NA|peak_17830	utr3	rna-XM_027445196.1	55	207	52	2	43	78	86	146	132	95	56	80
MARCH4	NC_040052.1	37288892	37288953	peak_5760	62	+	0.0230167670511	1.0	60.6109510086	peak_9113|NA	cds	rna-XM_027461527.1	86	167	115	53	120	60	79	140	139	130	72	94
KLHL12	NC_040072.1	2571271	2571481	peak_9812	211	+	-0.0230962259249	1.0	60.6109510086	NA|peak_17565	utr3	rna-XM_027444969.1	118	250	226	112	156	120	227	253	237	121	143	186
SYNPO2	NC_040049.1	44317251	44317491	peak_20020	241	-	-0.0230962259249	1.0	60.6109510086	NA|peak_6931	cds	rna-XM_005013494.4	44	72	74	33	39	44	130	206	188	94	94	121
DEAF1	NC_040050.1	34882660	34882869	peak_7099	210	+	-1.02309622592	0.622022411019	249.822057759	NA|peak_7596	utr3	rna-XM_027458101.1	61	58	41	31	42	31	90	68	89	54	26	36
LEO1	NC_040057.1	3115588	3120786	peak_19130	5199	-	-0.0230962259249	1.0	60.6109510086	peak_11872|peak_12413	cds	rna-XM_027466910.1	3266	6014	4919	2207	3106	1828	6792	7890	7533	4348	3200	4199
RUBCNL	NC_040046.1	28744202	28744531	peak_10480	330	+	-0.0230180247139	1.0	60.6109510086	peak_217|peak_230	cds	rna-XM_027471764.1	98	152	127	54	55	39	136	127	137	66	42	75
CCDC102A	NC_040056.1	19359186	19360051	peak_661	866	+	-0.0230962259249	1.0	60.6109510086	peak_11249|peak_11751	cds	rna-XM_027466093.1	1099	1946	1609	929	1132	848	2399	2515	2532	1981	1421	1587
TSC2	NC_040060.1	1580205	1580418	peak_13107	214	-	-0.0230962259249	1.0	60.6109510086	peak_13130|peak_13728	cds	rna-XM_027468927.1	530	1427	1087	507	741	550	708	1536	893	639	670	646
MACF1	NC_040069.1	78296	79608	peak_3927	1313	-	-0.0230962259249	1.0	60.6109510086	peak_16294|peak_17025	cds	rna-XM_027443786.1	3397	5784	5376	2976	3497	2970	4030	4766	4534	3016	2766	3104
OSBPL11	NC_040052.1	27498762	27499212	peak_5573	451	+	0.561944476007	1.0	60.6109510086	peak_9031|peak_9416	utr3	rna-XM_027462321.1	204	362	397	96	147	107	263	315	393	191	154	187
MAFG	NC_040064.1	334314	334585	peak_1732	272	-	0.976903774075	1.0	60.6109510086	peak_14435|peak_15101	utr3	rna-XM_027471247.1	88	189	141	63	63	85	133	130	98	100	48	108
DDX52	NC_040065.1	6941625	6942585	peak_4653	961	+	-0.0230180247139	1.0	60.6109510086	peak_14785|peak_15458	cds	rna-XM_027471771.1	1249	2256	2062	746	817	657	2455	2826	2847	1520	1034	1226
NAV1	NC_040072.1	2786248	2786458	peak_9827	211	+	0.976903774075	1.0	60.6109510086	peak_16831|peak_17579	cds	rna-XM_027444940.1	571	1226	1117	422	686	518	874	1238	961	667	697	577
UBN1	NC_040060.1	13288496	13288707	peak_13546	212	-	0.0230167670511	1.0	60.6109510086	peak_13334|NA	utr3	rna-XM_027468759.1	134	202	171	107	159	106	232	267	261	252	176	191
PTCHD1	NC_040046.1	88999649	88999710	peak_11113	62	-	-0.0230962259249	1.0	60.6109510086	NA|peak_1865	cds	rna-XM_027449064.1	10	21	31	13	8	21	53	49	45	24	35	30
CNST	NC_040048.1	28886601	28886962	peak_14809	362	+	-0.608059988685	0.685029977553	239.444841452	peak_4564|peak_4784	cds	rna-XM_027453864.1	80	173	125	46	77	44	149	98	143	75	24	45
CPSF3	NC_040048.1	102308441	102309285	peak_15741	845	+	-0.0230962259249	1.0	60.6109510086	peak_5004|peak_5243	cds	rna-XM_027455210.1	151	319	269	121	140	95	303	395	315	221	166	163
CTNNB1	NC_040047.1	46068407	46068677	peak_8556	271	+	-0.0230962259249	1.0	60.6109510086	peak_2973,peak_2972|peak_3100,peak_3099	utr3	rna-XM_027450106.1	3536	6912	5356	3294	4689	3137	9956	12950	10351	7984	7545	7583
TRMT6	NC_040048.1	15391367	15394643	peak_14523	3277	+	-0.0230962259249	1.0	60.6109510086	peak_4438|peak_4648	cds	rna-XM_021272182.2	270	650	387	211	269	156	535	619	597	365	239	366
PDXDC1	NC_040060.1	9948641	9949885	peak_13415	1245	+	-0.0230962259249	1.0	60.6109510086	peak_13011|peak_13595	cds	rna-XM_027469009.1	344	909	646	402	235	368	880	924	851	626	209	537
RABGEF1	NC_040065.1	11216958	11217318	peak_4908	361	-	-0.0230962259249	1.0	60.6109510086	peak_15227|peak_15904	utr3	rna-XM_013104594.3	184	448	349	167	237	147	379	402	435	266	195	210
TNKS2	NC_040051.1	17188762	17188972	peak_3175	211	-	-0.0230962259249	1.0	60.6109510086	peak_8552|peak_8961	utr3	rna-XM_013093938.3	120	191	154	122	139	94	131	110	138	91	64	98
LOC101796874	NC_040051.1	29485232	29485353	peak_3374	122	-	-1.02309622592	0.622022411019	249.822057759	NA|peak_9039	utr5	rna-XM_005017296.4	9	1	12	0	5	9	28	61	49	18	30	19
LOC101790579	NC_040048.1	111969127	111969188	peak_15848	62	+	0.0230167670511	1.0	60.6109510086	peak_5047|NA	cds	rna-XM_027455330.1	45	79	28	24	49	26	50	54	97	43	45	58
MED13	NC_040065.1	8362506	8362747	peak_4702	242	-	-0.0230974879642	1.0	60.6109510086	peak_15131|peak_15808	utr5	rna-XM_027472657.1	197	426	347	187	108	102	365	360	304	175	120	127
SFSWAP	NC_040061.1	2304432	2315753	peak_20599	11322	+	-0.0230949640235	1.0	60.6109510086	NA|peak_13998	cds	rna-XM_005018084.4	637	1024	949	655	883	622	968	1229	1062	962	774	795
TTN	NC_040052.1	20155524	20155795	peak_5392	272	+	0.0230962259249	1.0	60.6109510086	peak_8915|NA	cds	rna-XM_027461598.1	317	551	406	257	317	255	116	132	85	68	70	55
P3H3	NC_040046.1	121799605	121800246	peak_11606	642	+	0.976903774075	1.0	60.6109510086	peak_647|peak_701	NP_exon	rna-XR_003494930.1	699	1432	1026	653	511	532	1246	1388	1201	910	761	814
PCNX2	NC_040048.1	40768610	40777804	peak_15006	9195	+	-1.02313393453	0.130934329275	354.375992129	NA|peak_4876	cds	rna-XM_027454154.1	8	28	16	21	31	31	49	103	111	72	59	77
ENC1	NC_040075.1	24885357	24885837	peak_17708	481	-	-1.02309622592	0.622022411019	249.822057759	peak_18094|peak_18908	utr3	rna-XM_027446535.1	86	239	186	100	110	93	273	356	288	140	165	136
GFOD2	NC_040056.1	19058219	19058549	peak_645	331	-	0.976903774075	1.0	60.6109510086	peak_11637|peak_12152	utr3	rna-XM_027465666.1	112	193	85	80	75	57	154	211	183	121	82	125
ABCD2	NC_040046.1	187514551	187517190	peak_12741	2640	-	-0.0230974879642	1.0	60.6109510086	peak_2515,peak_2516|peak_2639,peak_2640	cds	rna-XM_027458918.1	173	331	213	109	151	58	357	334	398	162	113	152
NMT2	NC_040047.1	21877360	21877451	peak_8190	92	+	0.0230167670511	1.0	60.6109510086	peak_2822|NA	utr3	rna-XM_027452940.1	34	81	50	29	51	30	50	59	93	60	32	54
ZMYND11	NC_040047.1	10260126	10272048	peak_8027	11923	+	-0.0230949640235	1.0	60.6109510086	peak_2750|peak_2875	utr5	rna-XM_021266613.2	768	1456	1165	911	1258	711	1074	1423	1173	1227	1002	954
YY1	NC_040050.1	16560770	16561220	peak_6710	451	-	-0.0230962259249	1.0	60.6109510086	peak_7757|peak_8115	utr3	rna-XM_027457765.1	561	958	727	445	542	352	776	831	659	512	389	423
ULK1	NC_040061.1	2439849	2440240	peak_20602	392	+	-0.0230180247139	1.0	60.6109510086	peak_13378|peak_14001	utr5	rna-XM_027470198.1	162	352	224	147	121	78	342	370	272	165	165	206
DOCK7	NC_040053.1	7192460	7193385	peak_2193	926	+	0.976983232949	1.0	60.6109510086	peak_9455|peak_9854	cds	rna-XM_027462866.1	471	965	931	342	477	427	413	558	430	380	431	373
ANGPTL1	NC_040053.1	25075960	25082898	peak_2552	6939	-	-0.0230974879642	1.0	60.6109510086	peak_9951|peak_10386	cds	rna-XM_005019291.4	394	970	670	253	388	258	2543	2616	2386	1097	917	1026
MAPK1IP1L	NC_040050.1	8224577	8224786	peak_6501	210	+	-0.0231744228972	1.0	60.6109510086	NA|peak_7281	utr3	rna-XM_021278616.2	77	215	150	125	180	77	182	242	159	111	152	120
PLEKHG1	NC_040048.1	51102695	51102905	peak_15143	211	+	-0.0230962259249	1.0	60.6109510086	peak_4709|peak_4952	cds	rna-XM_005008901.4	169	263	258	136	210	129	255	357	251	174	197	189
LOC110354585	NW_020866968.1	77529	77650	peak_3485	122	+	0.0230180247139	1.0	60.6109510086	peak_18577|NA	cds	rna-XM_027448891.1	49	58	43	25	18	19	12	7	16	5	8	3
SLC24A2	NC_040075.1	33835625	33837890	peak_17823	2266	-	0.0230167670511	1.0	60.6109510086	peak_18140|NA	cds	rna-XM_027446180.1	22	41	27	12	20	20	24	43	27	50	24	11
FBXO3	NC_040050.1	52605691	52606050	peak_7561	360	-	-0.0230962259249	1.0	60.6109510086	peak_8097|peak_8478	utr3	rna-XM_027458892.1	264	491	389	240	259	196	521	593	509	434	275	351
HOXB6	NC_040073.1	5045523	5045671	peak_3753	149	-	0.0230962259249	1.0	60.6109510086	peak_17321|NA	utr5	rna-XM_013105668.3	28	78	73	30	51	24	105	144	117	74	80	69
ARHGAP31	NC_040046.1	118748847	118749745	peak_11468	899	-	-0.0230962259249	1.0	60.6109510086	peak_1936|peak_2041,peak_2042	cds	rna-XM_027449625.1	2828	4248	3696	2175	2253	1809	1699	1852	1558	1256	911	951
LRPAP1	NC_040049.1	66550301	66550511	peak_20370	211	+	0.976903774075	1.0	60.6109510086	peak_6305|peak_6582	utr3	rna-XM_027455605.1	183	305	277	102	163	112	295	294	406	200	168	218
CDR2L	NC_040064.1	4121028	4122139	peak_1933	1112	-	-0.0230167670511	1.0	60.6109510086	NA|peak_15173	cds	rna-XM_005011990.4	118	274	206	182	187	116	277	337	368	239	268	293
TTN	NC_040052.1	20054336	20055130	peak_5371	795	+	-0.0230962259249	1.0	60.6109510086	peak_8896|peak_9296	cds	rna-XM_027461598.1	3628	5013	6185	2734	2942	2621	1202	1402	1213	946	535	646
SLC7A1	NC_040046.1	21317392	21318306	peak_10347	915	-	-0.0230962259249	1.0	60.6109510086	peak_1393,peak_1392|peak_1483,peak_1481	utr3	rna-XM_027466575.1	129	283	217	148	155	105	490	585	591	308	316	378
NKX2-4	NC_040048.1	4677881	4678062	peak_14306	182	-	-0.438215721425	0.724403954196	246.977288619	peak_5158|peak_5408	utr3	rna-XM_027453173.1	12	19	15	7	6	2	8	23	23	7	4	2
ARMC8	NC_040054.1	16332726	16332906	peak_14028	181	-	-0.0230962259249	1.0	60.6109510086	NA|peak_10951	utr3	rna-XM_027464022.1	76	194	175	86	153	97	133	203	158	135	117	84
EDEM1	NC_040058.1	1584412	1584532	peak_1262	121	-	-1.02317568918	0.622012251195	633.83074332	NA|peak_12774	cds	rna-XM_005019910.4	8	25	10	13	10	8	15	27	14	9	13	0
CCNL1	NC_040054.1	1496874	1497054	peak_13669	181	-	-0.0230962259249	1.0	60.6109510086	peak_10315|peak_10777	utr3	rna-XM_027464008.1	175	280	253	150	191	110	201	345	354	196	141	192
ANP32A	NC_040056.1	1338905	1345885	peak_89	6981	+	-0.0230192825141	1.0	60.6109510086	peak_11007|peak_11487	utr3	rna-XM_027465690.1	32534	51128	53603	12951	14185	13005	72255	76510	66037	35072	17997	20443
CTTNBP2NL	NC_040072.1	1906869	1906990	peak_9779	122	+	0.976903774075	1.0	60.6109510086	peak_16800|NA	utr5	rna-XM_005013680.4	15	53	18	19	18	8	23	35	43	15	26	21
MDFI	NC_040072.1	3486227	3486287	peak_9860	61	+	0.0230962259249	1.0	60.6109510086	peak_16844|NA	cds	rna-XM_027444899.1	105	160	149	80	84	88	254	191	307	184	149	199
TRMT6	NC_040048.1	15385161	15388676	peak_14522	3516	+	0.976903774075	1.0	60.6109510086	peak_4437|peak_4647	utr5	rna-XM_021272182.2	266	400	340	190	182	131	507	502	475	366	204	324
LOC101797811	NC_040075.1	51723526	51765163	peak_18015	41638	-	-0.0230167670511	1.0	60.6109510086	peak_18233|peak_19065	cds	rna-XM_027446332.1	431	603	511	434	457	347	374	314	271	323	166	232
VPS13C	NC_040056.1	14947656	14950444	peak_480	2789	+	0.976903774075	1.0	60.6109510086	peak_11173|NA	cds	rna-XM_027465720.1	192	389	325	170	210	122	261	444	390	238	237	282
[truncated: 19,033 more rows]
