# Supplementary material for: Profiling Analysis of N6-Methyladenosine mRNA Methylation Reveals Differential m6A Patterns during the Embryonic Skeletal Muscle Development of Ducks
Source: Animals (Basel). 2022 Sep 28;12(19):2593. doi: 10.3390/ani12192593 (PMC9559603; doi:10.3390/ani12192593)
Supplement: Supplementary file 1 [file animals-12-02593-s001.zip › Table S11.xls]

Term	Database	ID	Input_number	Background_number	Rich_factor	P_Value	FDR	Input	Hyperlink
AMPK signaling pathway	KEGG PATHWAY	ko04152	4	82	12.76422764	0.000259714	0.36499711	K05031:CFTR|K04427:LOC101800996|K07187:IRS2|K07359:CAMKK1	https://www.kegg.jp/kegg-bin/show_pathway?ko04152/K05031%09red/K04427%09red/K07187%09red/K07359%09red/
Neuroactive ligand-receptor interaction	KEGG PATHWAY	ko04080	6	279	5.627240143	0.000616924	0.308256426	K05207:GRID2|K05222:TRPV1|K05203:GRIK3|K04236:F2RL3|K04320:LOC101803483|K04142:LOC101800857	https://www.kegg.jp/kegg-bin/show_pathway?ko04080/K05207%09red/K05222%09red/K05203%09red/K04236%09red/K04320%09red/K04142%09red/
Type I diabetes mellitus	KEGG PATHWAY	ko04940	2	25	20.93333333	0.004045674	0.381564937	K01580:GAD1|K07817:PTPRN2	https://www.kegg.jp/kegg-bin/show_pathway?ko04940/K01580%09red/K07817%09red/
Oxytocin signaling pathway	KEGG PATHWAY	ko04921	3	111	7.072072072	0.008648023	0.435480744	K16342:LOC101794571|K04863:CACNB2|K07359:CAMKK1	https://www.kegg.jp/kegg-bin/show_pathway?ko04921/K16342%09red/K04863%09red/K07359%09red/
Axon guidance	KEGG PATHWAY	ko04360	3	121	6.487603306	0.010936036	0.381564937	K05106:EPHA5|K20013:GDF7|K07520:ABLIM1	https://www.kegg.jp/kegg-bin/show_pathway?ko04360/K05106%09red/K20013%09red/K07520%09red/
Regulation of lipolysis in adipocytes	KEGG PATHWAY	ko04923	2	45	11.62962963	0.012722258	0.559867791	K04142:LOC101800857|K07187:IRS2	https://www.kegg.jp/kegg-bin/show_pathway?ko04923/K04142%09red/K07187%09red/
Long-term depression	KEGG PATHWAY	ko04730	2	45	11.62962963	0.012722258	0.591443272	K16342:LOC101794571|K05207:GRID2	https://www.kegg.jp/kegg-bin/show_pathway?ko04730/K16342%09red/K05207%09red/
Gastric acid secretion	KEGG PATHWAY	ko04971	2	49	10.68027211	0.014967891	0.392020489	K05031:CFTR|K04920:KCNK10	https://www.kegg.jp/kegg-bin/show_pathway?ko04971/K05031%09red/K04920%09red/
NOD-like receptor signaling pathway	KEGG PATHWAY	ko04621	2	51	10.26143791	0.016150173	0.326147372	K12800:LOC101795933|K04427:LOC101800996	https://www.kegg.jp/kegg-bin/show_pathway?ko04621/K12800%09red/K04427%09red/
Adipocytokine signaling pathway	KEGG PATHWAY	ko04920	2	53	9.874213836	0.017371245	0.381564937	K07187:IRS2|K07359:CAMKK1	https://www.kegg.jp/kegg-bin/show_pathway?ko04920/K07187%09red/K07359%09red/
cAMP signaling pathway	KEGG PATHWAY	ko04024	3	146	5.376712329	0.01806851	0.381564937	K05031:CFTR|K06230:GLI3|K04142:LOC101800857	https://www.kegg.jp/kegg-bin/show_pathway?ko04024/K05031%09red/K06230%09red/K04142%09red/
Bile secretion	KEGG PATHWAY	ko04976	2	59	8.870056497	0.02126093	0.241309748	K05031:CFTR|K05681:ABCG2	https://www.kegg.jp/kegg-bin/show_pathway?ko04976/K05031%09red/K05681%09red/
Inflammatory mediator regulation of TRP channels	KEGG PATHWAY	ko04750	2	67	7.810945274	0.026952752	0.559867791	K16342:LOC101794571|K05222:TRPV1	https://www.kegg.jp/kegg-bin/show_pathway?ko04750/K16342%09red/K05222%09red/
Longevity regulating pathway	KEGG PATHWAY	ko04211	2	68	7.696078431	0.027703175	0.381564937	K07187:IRS2|K07359:CAMKK1	https://www.kegg.jp/kegg-bin/show_pathway?ko04211/K07187%09red/K07359%09red/
MAPK signaling pathway	KEGG PATHWAY	ko04010	3	191	4.109947644	0.036141939	0.438806205	K16342:LOC101794571|K04427:LOC101800996|K04863:CACNB2	https://www.kegg.jp/kegg-bin/show_pathway?ko04010/K16342%09red/K04427%09red/K04863%09red/
Pertussis	KEGG PATHWAY	ko05133	2	79	6.624472574	0.03649733	0.384786619	K12800:LOC101795933|K10067:SFTPA	https://www.kegg.jp/kegg-bin/show_pathway?ko05133/K12800%09red/K10067%09red/
MAPK signaling pathway - fly	KEGG PATHWAY	ko04013	2	84	6.23015873	0.04080588	0.381564937	K17536:LOC101797884|K04427:LOC101800996	https://www.kegg.jp/kegg-bin/show_pathway?ko04013/K17536%09red/K04427%09red/
Mucin type O-Glycan biosynthesis	KEGG PATHWAY	ko00512	1	11	23.78787879	0.041262497	0.653020616	K00727:1d0b6bb0-92e2-4ed4-a489-2fc3e1d72af7	https://www.kegg.jp/kegg-bin/show_pathway?ko00512/K00727%09red/
Glutamatergic synapse	KEGG PATHWAY	ko04724	2	85	6.156862745	0.041689778	0.182327689	K16342:LOC101794571|K05203:GRIK3	https://www.kegg.jp/kegg-bin/show_pathway?ko04724/K16342%09red/K05203%09red/
Platelet activation	KEGG PATHWAY	ko04611	2	87	6.015325671	0.043479234	0.381564937	K16342:LOC101794571|K04236:F2RL3	https://www.kegg.jp/kegg-bin/show_pathway?ko04611/K16342%09red/K04236%09red/
Adrenergic signaling in cardiomyocytes	KEGG PATHWAY	ko04261	2	92	5.688405797	0.048076202	0.384786619	K04142:LOC101800857|K04863:CACNB2	https://www.kegg.jp/kegg-bin/show_pathway?ko04261/K04142%09red/K04863%09red/
