# Supplementary material for: Profiling Analysis of N6-Methyladenosine mRNA Methylation Reveals Differential m6A Patterns during the Embryonic Skeletal Muscle Development of Ducks
Source: Animals (Basel). 2022 Sep 28;12(19):2593. doi: 10.3390/ani12192593 (PMC9559603; doi:10.3390/ani12192593)
Supplement: Supplementary file 1 [file animals-12-02593-s001.zip › Table S12.xls]

Term	Database	ID	Input_number	Background_number	Rich_factor	P_Value	FDR	Input	Hyperlink
cAMP signaling pathway	KEGG PATHWAY	ko04024	4	146	5.01826484	0.008196448	0.001183808	K04851:CACNA1D|K08048:7cfef49c-b7a6-4ae4-94a1-cd41a48c861a|K05213:GRIN3A|K04153:HTR1F,HTR1F	https://www.kegg.jp/kegg-bin/show_pathway?ko04024/K04851%09red/K08048%09red/K05213%09red/K04153%09red/
GABAergic synapse	KEGG PATHWAY	ko04727	5	65	14.08974359	2.63E-05	0.007702857	K05185:LOC101802277|K05175:GABRA2|K05186:GABRG1|K08048:7cfef49c-b7a6-4ae4-94a1-cd41a48c861a|K04851:CACNA1D	https://www.kegg.jp/kegg-bin/show_pathway?ko04727/K05185%09red/K05175%09red/K05186%09red/K08048%09red/K04851%09red/
GnRH signaling pathway	KEGG PATHWAY	ko04912	3	63	8.722222222	0.00486925	0.00803228	K04851:CACNA1D|K08048:7cfef49c-b7a6-4ae4-94a1-cd41a48c861a|K05871:PTK2B	https://www.kegg.jp/kegg-bin/show_pathway?ko04912/K04851%09red/K08048%09red/K05871%09red/
Melanogenesis	KEGG PATHWAY	ko04916	4	67	10.93532338	0.000475987	0.013547733	K00312:WNT3,WNT3|K08048:7cfef49c-b7a6-4ae4-94a1-cd41a48c861a|K00572:WNT7A,WNT7B|K02620:TCF7	https://www.kegg.jp/kegg-bin/show_pathway?ko04916/K00312%09red/K08048%09red/K00572%09red/K02620%09red/
Signaling pathways regulating pluripotency of stem cells	KEGG PATHWAY	ko04550	3	108	5.087962963	0.021065876	0.028102205	K00312:WNT3,WNT3|K18489:DLX5|K00572:WNT7A,WNT7B	https://www.kegg.jp/kegg-bin/show_pathway?ko04550/K00312%09red/K18489%09red/K00572%09red/
Glutamatergic synapse	KEGG PATHWAY	ko04724	4	85	8.619607843	0.001168863	0.041084296	K04851:CACNA1D|K04607:GRM4|K08048:7cfef49c-b7a6-4ae4-94a1-cd41a48c861a|K05213:GRIN3A	https://www.kegg.jp/kegg-bin/show_pathway?ko04724/K04851%09red/K04607%09red/K08048%09red/K05213%09red/
Proteoglycans in cancer	KEGG PATHWAY	ko05205	4	162	4.522633745	0.011698794	0.041457326	K00312:WNT3,WNT3|K00572:WNT7A,WNT7B|K08550:97717df5-85c9-409c-b480-491de14099c4|K08109:GPC3	https://www.kegg.jp/kegg-bin/show_pathway?ko05205/K00312%09red/K00572%09red/K08550%09red/K08109%09red/
Salivary secretion	KEGG PATHWAY	ko04970	3	63	8.722222222	0.00486925	0.071788056	K13240:NOS1|K04975:LOC101797054|K08048:7cfef49c-b7a6-4ae4-94a1-cd41a48c861a	https://www.kegg.jp/kegg-bin/show_pathway?ko04970/K13240%09red/K04975%09red/K08048%09red/
Arrhythmogenic right ventricular cardiomyopathy (ARVC)	KEGG PATHWAY	ko05412	2	65	5.635897436	0.04895582	0.0978881	K02620:TCF7|K04851:CACNA1D	https://www.kegg.jp/kegg-bin/show_pathway?ko05412/K02620%09red/K04851%09red/
Sphingolipid metabolism	KEGG PATHWAY	ko00600	2	41	8.93495935	0.020969289	0.101567617	K04710:CERS3|K04628:LOC101794817	https://www.kegg.jp/kegg-bin/show_pathway?ko00600/K04710%09red/K04628%09red/
Adrenergic signaling in cardiomyocytes	KEGG PATHWAY	ko04261	3	92	5.972826087	0.013775162	0.108729688	K04851:CACNA1D|K08048:7cfef49c-b7a6-4ae4-94a1-cd41a48c861a|K04445:RPS6KA5	https://www.kegg.jp/kegg-bin/show_pathway?ko04261/K04851%09red/K08048%09red/K04445%09red/
Gap junction	KEGG PATHWAY	ko04540	2	59	6.209039548	0.041111699	0.108729688	K07373:GJD2|K08048:7cfef49c-b7a6-4ae4-94a1-cd41a48c861a	https://www.kegg.jp/kegg-bin/show_pathway?ko04540/K07373%09red/K08048%09red/
Basal cell carcinoma	KEGG PATHWAY	ko05217	3	42	13.08333333	0.001526538	0.154168871	K00312:WNT3,WNT3|K00572:WNT7A,WNT7B|K02620:TCF7	https://www.kegg.jp/kegg-bin/show_pathway?ko05217/K00312%09red/K00572%09red/K02620%09red/
HTLV-I infection	KEGG PATHWAY	ko05166	5	206	4.44579288	0.005220552	0.169462455	K00312:WNT3,WNT3|K08048:7cfef49c-b7a6-4ae4-94a1-cd41a48c861a|K02324:LOC101790280|K00572:WNT7A,WNT7B|K04725:XIAP	https://www.kegg.jp/kegg-bin/show_pathway?ko05166/K00312%09red/K08048%09red/K02324%09red/K00572%09red/K04725%09red/
Prolactin signaling pathway	KEGG PATHWAY	ko04917	2	57	6.426900585	0.038613988	0.169462455	K08550:97717df5-85c9-409c-b480-491de14099c4|K04248:LOC101803098	https://www.kegg.jp/kegg-bin/show_pathway?ko04917/K08550%09red/K04248%09red/
Pathways in cancer	KEGG PATHWAY	ko05200	6	316	3.477848101	0.007322823	0.193602365	K00312:WNT3,WNT3|K08048:7cfef49c-b7a6-4ae4-94a1-cd41a48c861a|K04725:XIAP|K02620:TCF7|K04291:LPAR2|K00572:WNT7A,WNT7B	https://www.kegg.jp/kegg-bin/show_pathway?ko05200/K00312%09red/K08048%09red/K04725%09red/K02620%09red/K04291%09red/K00572%09red/
Platinum drug resistance	KEGG PATHWAY	ko01524	2	45	8.140740741	0.024967558	0.193602365	K17686:d24d5566-c510-49f6-a160-7f459217dd7c|K04725:XIAP	https://www.kegg.jp/kegg-bin/show_pathway?ko01524/K17686%09red/K04725%09red/
Wnt signaling pathway	KEGG PATHWAY	ko04310	5	103	8.891585761	0.000237992	0.220435005	K03213:NKD1|K00312:WNT3,WNT3|K16834:SOST|K00572:WNT7A,WNT7B|K02620:TCF7	https://www.kegg.jp/kegg-bin/show_pathway?ko04310/K03213%09red/K00312%09red/K16834%09red/K00572%09red/K02620%09red/
Mineral absorption	KEGG PATHWAY	ko04978	2	30	12.21111111	0.011558142	0.220435005	K12347:SLC11A2|K04975:LOC101797054	https://www.kegg.jp/kegg-bin/show_pathway?ko04978/K12347%09red/K04975%09red/
Amphetamine addiction	KEGG PATHWAY	ko05031	2	45	8.140740741	0.024967558	0.220435005	K04851:CACNA1D|K05213:GRIN3A	https://www.kegg.jp/kegg-bin/show_pathway?ko05031/K04851%09red/K05213%09red/
Calcium signaling pathway	KEGG PATHWAY	ko04020	5	141	6.495271868	0.001003536	0.271737986	K04851:CACNA1D|K08048:7cfef49c-b7a6-4ae4-94a1-cd41a48c861a|K05871:PTK2B|K04248:LOC101803098|K13240:NOS1	https://www.kegg.jp/kegg-bin/show_pathway?ko04020/K04851%09red/K08048%09red/K05871%09red/K04248%09red/K13240%09red/
Cell adhesion molecules (CAMs)	KEGG PATHWAY	ko04514	3	99	5.550505051	0.016750464	0.271737986	K06757:NFASC|K06087:LOC101802171|K16359:NTNG2	https://www.kegg.jp/kegg-bin/show_pathway?ko04514/K06757%09red/K06087%09red/K16359%09red/
Long-term depression	KEGG PATHWAY	ko04730	2	45	8.140740741	0.024967558	0.282274107	K13240:NOS1|K05854:LYN	https://www.kegg.jp/kegg-bin/show_pathway?ko04730/K13240%09red/K05854%09red/
Estrogen signaling pathway	KEGG PATHWAY	ko04915	2	65	5.635897436	0.04895582	0.28667772	K08048:7cfef49c-b7a6-4ae4-94a1-cd41a48c861a|K08550:97717df5-85c9-409c-b480-491de14099c4	https://www.kegg.jp/kegg-bin/show_pathway?ko04915/K08048%09red/K08550%09red/
Phospholipase D signaling pathway	KEGG PATHWAY	ko04072	4	99	7.400673401	0.002053332	0.286927848	K04291:LPAR2|K08048:7cfef49c-b7a6-4ae4-94a1-cd41a48c861a|K05871:PTK2B|K04607:GRM4	https://www.kegg.jp/kegg-bin/show_pathway?ko04072/K04291%09red/K08048%09red/K05871%09red/K04607%09red/
Neuroactive ligand-receptor interaction	KEGG PATHWAY	ko04080	10	279	6.565113501	2.33E-06	0.318879263	K05185:LOC101802277|K05186:GABRG1|K05213:GRIN3A|K05175:GABRA2|K04248:LOC101803098|K04291:LPAR2|K04320:LOC101803483,LOC101803483|K04607:GRM4|K04583:GCGR|K04153:HTR1F,HTR1F	https://www.kegg.jp/kegg-bin/show_pathway?ko04080/K05185%09red/K05186%09red/K05213%09red/K05175%09red/K04248%09red/K04291%09red/K04320%09red/K04607%09red/K04583%09red/K04153%09red/
Gastric acid secretion	KEGG PATHWAY	ko04971	2	49	7.476190476	0.029250199	0.333261061	K08048:7cfef49c-b7a6-4ae4-94a1-cd41a48c861a|K04920:KCNK10	https://www.kegg.jp/kegg-bin/show_pathway?ko04971/K08048%09red/K04920%09red/
Longevity regulating pathway - multiple species	KEGG PATHWAY	ko04213	2	58	6.316091954	0.039855305	0.333261061	K08048:7cfef49c-b7a6-4ae4-94a1-cd41a48c861a|K08035:FOXA2	https://www.kegg.jp/kegg-bin/show_pathway?ko04213/K08048%09red/K08035%09red/
Morphine addiction	KEGG PATHWAY	ko05032	4	64	11.44791667	0.000399407	0.336602524	K05185:LOC101802277|K05175:GABRA2|K05186:GABRG1|K08048:7cfef49c-b7a6-4ae4-94a1-cd41a48c861a	https://www.kegg.jp/kegg-bin/show_pathway?ko05032/K05185%09red/K05175%09red/K05186%09red/K08048%09red/
Ovarian steroidogenesis	KEGG PATHWAY	ko04913	2	39	9.393162393	0.01908122	0.343370375	K08048:7cfef49c-b7a6-4ae4-94a1-cd41a48c861a|K04248:LOC101803098	https://www.kegg.jp/kegg-bin/show_pathway?ko04913/K08048%09red/K04248%09red/
Nicotine addiction	KEGG PATHWAY	ko05033	4	27	27.13580247	1.28E-05	0.357384004	K05185:LOC101802277|K05175:GABRA2|K05186:GABRG1|K05213:GRIN3A	https://www.kegg.jp/kegg-bin/show_pathway?ko05033/K05185%09red/K05175%09red/K05186%09red/K05213%09red/
Retrograde endocannabinoid signaling	KEGG PATHWAY	ko04723	5	74	12.37612613	4.94E-05	0.357384004	K05185:LOC101802277|K05175:GABRA2|K05186:GABRG1|K08048:7cfef49c-b7a6-4ae4-94a1-cd41a48c861a|K04851:CACNA1D	https://www.kegg.jp/kegg-bin/show_pathway?ko04723/K05185%09red/K05175%09red/K05186%09red/K08048%09red/K04851%09red/
Chemokine signaling pathway	KEGG PATHWAY	ko04062	3	146	3.76369863	0.045379577	0.402143637	K05854:LYN|K08048:7cfef49c-b7a6-4ae4-94a1-cd41a48c861a|K05871:PTK2B	https://www.kegg.jp/kegg-bin/show_pathway?ko04062/K05854%09red/K08048%09red/K05871%09red/
Circadian entrainment	KEGG PATHWAY	ko04713	4	76	9.640350877	0.000768157	0.420574999	K04851:CACNA1D|K08048:7cfef49c-b7a6-4ae4-94a1-cd41a48c861a|K04445:RPS6KA5|K13240:NOS1	https://www.kegg.jp/kegg-bin/show_pathway?ko04713/K04851%09red/K08048%09red/K04445%09red/K13240%09red/
Lysosome	KEGG PATHWAY	ko04142	3	102	5.387254902	0.018127426	0.435857037	K12347:SLC11A2|K12400:AP4E1|K01132:GALNS	https://www.kegg.jp/kegg-bin/show_pathway?ko04142/K12347%09red/K12400%09red/K01132%09red/
Insulin secretion	KEGG PATHWAY	ko04911	3	67	8.201492537	0.005784181	0.468357313	K04851:CACNA1D|K08048:7cfef49c-b7a6-4ae4-94a1-cd41a48c861a|K16882:PCLO,PCLO	https://www.kegg.jp/kegg-bin/show_pathway?ko04911/K04851%09red/K08048%09red/K16882%09red/
Hippo signaling pathway	KEGG PATHWAY	ko04390	4	109	6.721712538	0.002914303	0.500225181	K06092:PATJ|K00312:WNT3,WNT3|K00572:WNT7A,WNT7B|K02620:TCF7	https://www.kegg.jp/kegg-bin/show_pathway?ko04390/K06092%09red/K00312%09red/K00572%09red/K02620%09red/
Aldosterone synthesis and secretion	KEGG PATHWAY	ko04925	2	58	6.316091954	0.039855305	0.717232765	K04851:CACNA1D|K08048:7cfef49c-b7a6-4ae4-94a1-cd41a48c861a	https://www.kegg.jp/kegg-bin/show_pathway?ko04925/K04851%09red/K08048%09red/
Taste transduction	KEGG PATHWAY	ko04742	4	40	18.31666667	6.33E-05	0.735101797	K05175:GABRA2|K04607:GRM4|K08048:7cfef49c-b7a6-4ae4-94a1-cd41a48c861a|K04153:HTR1F,HTR1F	https://www.kegg.jp/kegg-bin/show_pathway?ko04742/K05175%09red/K04607%09red/K08048%09red/K04153%09red/
