# Supplementary material for: Profiling Analysis of N6-Methyladenosine mRNA Methylation Reveals Differential m6A Patterns during the Embryonic Skeletal Muscle Development of Ducks
Source: Animals (Basel). 2022 Sep 28;12(19):2593. doi: 10.3390/ani12192593 (PMC9559603; doi:10.3390/ani12192593)
Supplement: Supplementary file 1 [file animals-12-02593-s001.zip › Table S13.xls]

Geneid	Chr	Start	End	Strand	Length	T1	T2	T3	C1	C2	C3	T___C_PValue	T___C_FDR	T___C_logFC	uniprotAc	Refseq	pfam	interpro	eggNOG	GO(GO_term,class,description)	KEGG(KO,pathway,description)
GRHL2	NC_040047.1;NC_040047.1;NC_040047.1;NC_040047.1;NC_040047.1;NC_040047.1;NC_040047.1;NC_040047.1;NC_040047.1;NC_040047.1;NC_040047.1;NC_040047.1;NC_040047.1;NC_040047.1;NC_040047.1;NC_040047.1;NC_040047.1;NC_040047.1;NC_040047.1;NC_040047.1;NC_040047.1;NC_040047.1;NC_040047.1;NC_040047.1;NC_040047.1;NC_040047.1;NC_040047.1;NC_040047.1;NC_040047.1;NC_040047.1;NC_040047.1;NC_040047.1	135107565;135107565;135119143;135119143;135122284;135122284;135123862;135123862;135127457;135127457;135130327;135130327;135132876;135132876;135136829;135136829;135144926;135144926;135150036;135150036;135150208;135150211;135152536;135152536;135153759;135153759;135157682;135157682;135162488;135162488;135163115;135163115	135107860;135107860;135119332;135119332;135122351;135122351;135124246;135124246;135127509;135127509;135130480;135130480;135132987;135132987;135136923;135136923;135145084;135145084;135150123;135150123;135150347;135150347;135152567;135152567;135153853;135153853;135157767;135157767;135162552;135162552;135167467;135167467	+;+;+;+;+;+;+;+;+;+;+;+;+;+;+;+;+;+;+;+;+;+;+;+;+;+;+;+;+;+;+;+	6371	0.053756338	0.076073779	0.073904619	5.778751393	6.78590607	5.98005649	1.17E-10	8.72E-07	-6.18382194	R0KS02,Uncharacterized protein	-	PF04516,CP2 transcription factor	IPR007604,CP2 transcription factor	-	-	-
KIF26B	NC_040048.1;NC_040048.1;NC_040048.1;NC_040048.1;NC_040048.1;NC_040048.1;NC_040048.1;NC_040048.1;NC_040048.1;NC_040048.1;NC_040048.1;NC_040048.1;NC_040048.1;NC_040048.1;NC_040048.1;NC_040048.1;NC_040048.1;NC_040048.1;NC_040048.1;NC_040048.1;NC_040048.1;NC_040048.1;NC_040048.1;NC_040048.1;NC_040048.1;NC_040048.1;NC_040048.1;NC_040048.1;NC_040048.1	28156186;28156620;28188328;28246728;28246728;28276341;28276341;28341383;28341383;28381727;28381727;28383120;28383120;28385304;28385304;28388537;28388537;28393650;28393650;28421415;28421415;28422683;28422683;28438861;28438861;28440373;28440373;28441476;28441476	28156544;28157021;28188518;28247261;28247261;28276507;28276507;28341566;28341566;28381933;28381933;28383213;28383213;28385566;28385566;28388720;28388720;28393809;28393809;28421577;28421577;28426118;28426118;28439063;28439063;28440523;28440523;28447541;28447541	+;+;+;+;+;+;+;+;+;+;+;+;+;+;+;+;+;+;+;+;+;+;+;+;+;+;+;+;+	12764	0.017887894	0.027122378	0.026828086	2.336291903	2.286782095	2.931461093	2.34E-10	8.72E-07	-6.382259014	R0JY10,Kinesin-like protein KIF26B	-	PF00225,Kinesin motor domain	IPR036961,Kinesin motor domain superfamily;IPR027640,Kinesin-like protein;IPR001752,Kinesin motor domain;IPR027417,P-loop containing nucleoside triphosphate hydrolase	-	GO:0003777,molecular_function,microtubule motor activity;GO:0003774,molecular_function,motor activity;GO:0008017,molecular_function,microtubule binding;GO:0007018,biological_process,microtubule-based movement;GO:0000166,molecular_function,nucleotide binding;GO:0005524,molecular_function,ATP binding	-
LOC101790674	NC_040073.1;NC_040073.1;NC_040073.1;NC_040073.1	6575176;6575179;6579004;6579017	6577522;6577522;6583182;6583182	+;+;+;+	6526	0.116621251	0.137924317	0.157416654	13.90274497	14.67332166	11.34420102	1.37E-10	8.72E-07	-6.290189511	U3IHS5,Twist family bHLH transcription factor 1	-	PF00010,Helix-loop-helix DNA-binding domain	IPR011598,Myc-type, basic helix-loop-helix (bHLH) domain;IPR036638,Helix-loop-helix DNA-binding domain superfamily	-	GO:0046983,molecular_function,protein dimerization activity	-
LOC101791758	NC_040073.1;NC_040073.1;NC_040073.1;NC_040073.1;NC_040073.1;NC_040073.1;NC_040073.1;NC_040073.1	3327391;3329682;3330080;3330472;3330786;3331023;3332023;3332992	3328071;3329764;3330236;3330633;3330911;3331243;3332051;3333271	+;+;+;+;+;+;+;+	1739	2.407065293	2.448612668	2.633726659	41.58775224	44.29676209	39.94271596	2.18E-10	8.72E-07	-3.758275196	U3IN94,Keratin 19	-	PF00038,Intermediate filament protein	IPR018039,Intermediate filament protein, conserved site;IPR001664,Intermediate filament protein;IPR002957,Keratin, type I	-	GO:0005882,cellular_component,intermediate filament;GO:0045214,biological_process,sarcomere organization;GO:0030018,cellular_component,Z disc;GO:1990357,cellular_component,terminal web;GO:0007219,biological_process,Notch signaling pathway;GO:0071944,cellular_component,cell periphery;GO:0005886,cellular_component,plasma membrane;GO:0005198,molecular_function,structural molecule activity;GO:0043034…	-
IRX2	NC_040047.1;NC_040047.1;NC_040047.1;NC_040047.1;NC_040047.1	90922865;90924150;90924920;90926072;90928271	90923462;90924217;90925672;90926477;90929130	-;-;-;-;-	2685	0.056690524	0.077360902	0.047825935	7.865609211	7.766847526	7.483120215	4.15E-10	9.51E-07	-6.621886694	Q9PU52,Iroquois homeobox 2	NP_001025507.1,iroquois-class homeodomain protein IRX-2;XP_015137852.1,-	PF05920,Homeobox KN domain	IPR017970,Homeobox, conserved site;IPR008422,Homeobox KN domain;IPR001356,Homeobox domain;IPR009057,Homeobox-like domain superfamily;IPR003893,Iroquois-class homeodomain protein	KOG0773,Transcription factor MEIS1 and related HOX domain proteins;ENOG410XPMQ,-	GO:0003677,molecular_function,DNA binding;GO:0043565,molecular_function,sequence-specific DNA binding;GO:0072272,biological_process,proximal/distal pattern formation involved in metanephric nephron development;GO:0006355,biological_process,regulation of transcription, DNA-templated;GO:0072086,biological_process,specification of loop of Henle identity;GO:0000122,biological_process,negative regulat…	-
LOC101802901	NC_040065.1;NC_040065.1;NC_040065.1;NC_040065.1;NC_040065.1	518452;524962;525222;525366;525631	518482;525114;525287;525499;526942	+;+;+;+;+	1696	137.0464999	148.1921966	136.6403317	27.94685612	27.70778275	27.855357	4.00E-10	9.51E-07	2.650482631	R0KZK4,Uncharacterized protein	-	PF15312,Junctional sarcoplasmic reticulum protein	IPR026178,Junctional sarcoplasmic reticulum protein 1	-	-	-
NDNF	NC_040049.1;NC_040049.1;NC_040049.1;NC_040049.1;NC_040049.1;NC_040049.1;NC_040049.1;NC_040049.1;NC_040049.1;NC_040049.1;NC_040049.1;NC_040049.1;NC_040049.1;NC_040049.1;NC_040049.1;NC_040049.1	43623878;43624578;43625172;43626998;43640297;43640297;43640297;43640297;43641547;43641547;43641547;43641547;43642373;43642373;43642373;43642373	43624015;43624741;43625404;43627228;43640485;43640485;43640485;43640485;43641671;43641671;43641671;43641671;43644429;43644429;43644429;43644429	+;+;+;+;+;+;+;+;+;+;+;+;+;+;+;+	3137	0.533743901	0.673177945	0.723182411	21.88339293	17.68210533	18.94623725	4.84E-10	9.51E-07	-4.612898349	R0LVG7,Fibronectin type-III domain-containing protein C4orf31	XP_005013570.1,protein NDNF isoform X2	PF10179,Uncharacterised conserved protein (DUF2369)	IPR019326,Protein of unknown function DUF2369;IPR036116,Fibronectin type III superfamily;IPR003961,Fibronectin type III	-	-	-
SFRP1	NC_040068.1;NC_040068.1;NC_040068.1	2099139;2109884;2113385	2102907;2109961;2113993	-;-;-	4456	3.68920962	4.241915599	4.217021762	33.28435812	30.32435254	32.58911967	5.10E-10	9.51E-07	-2.673577296	H0Z429,Secreted frizzled related protein 1	XP_002194639.1,secreted frizzled-related protein 1	PF01392,z domain;PF01759,UNC-6/NTR/C345C module	IPR008993,Tissue inhibitor of metalloproteinases-like, OB-fold;IPR015526,Frizzled/secreted frizzled-related protein;IPR026559,Secreted frizzled-related protein 1;IPR036790,Frizzled cysteine-rich domain superfamily;IPR001134,Netrin domain;IPR018933,Netrin module, non-TIMP type;IPR020067,Frizzled domain	ENOG410XRC8,-;KOG3577,Smoothened and related G-protein-coupled receptors	GO:0016055,biological_process,Wnt signaling pathway;GO:2000271,biological_process,positive regulation of fibroblast apoptotic process;GO:0014034,biological_process,neural crest cell fate commitment;GO:0071392,biological_process,cellular response to estradiol stimulus;GO:0005109,molecular_function,frizzled binding;GO:0060346,biological_process,bone trabecula formation;GO:0060527,biological_process…	K02166,ko04310,Wnt signaling pathway
FGFR2	NC_040051.1;NC_040051.1;NC_040051.1;NC_040051.1;NC_040051.1;NC_040051.1;NC_040051.1;NC_040051.1;NC_040051.1;NC_040051.1;NC_040051.1;NC_040051.1;NC_040051.1;NC_040051.1;NC_040051.1;NC_040051.1;NC_040051.1;NC_040051.1;NC_040051.1;NC_040051.1;NC_040051.1;NC_040051.1;NC_040051.1;NC_040051.1;NC_040051.1;NC_040051.1;NC_040051.1;NC_040051.1;NC_040051.1;NC_040051.1;NC_040051.1;NC_040051.1;NC_040051.1;NC_…	5110164;5110164;5110164;5110164;5110164;5126165;5126165;5126165;5126165;5127121;5127121;5127121;5127121;5133840;5133840;5133840;5133840;5133840;5140313;5140313;5140313;5140313;5140313;5156023;5156023;5156023;5156023;5156023;5156948;5156948;5156948;5158739;5158739;5160906;5160906;5160906;5160906;5160906;5169242;5169309;5169310;5169310;5169310;5169328;5172667;5172667;5172667;5172667;5172667;5173371…	5110338;5110338;5110338;5110338;5110338;5126431;5126431;5126431;5126431;5127195;5127195;5127195;5127195;5134009;5134009;5134009;5134009;5134009;5140436;5140436;5140436;5140436;5140436;5156213;5156213;5156213;5156213;5156213;5157095;5157095;5157095;5158883;5158883;5161109;5161104;5161104;5161108;5161104;5169261;5169459;5169459;5169459;5169459;5169459;5172788;5172788;5172788;5172788;5172788;5173481…	+;+;+;+;+;+;+;+;+;+;+;+;+;+;+;+;+;+;+;+;+;+;+;+;+;+;+;+;+;+;+;+;+;+;+;+;+;+;+;+;+;+;+;+;+;+;+;+;+;+;+;+;+;+;+;+;+;+;+;+;+;+;+;+;+;+;+;+;+;+;+;+;+;+;+;+;+;+;+;+;+;+;+;+	4276	1.076818335	0.898669174	1.151189045	22.27151208	21.46536703	28.37115189	8.93E-10	1.09E-06	-4.209786577	R0JRY2,Receptor protein-tyrosine kinase	XP_012956529.1,-	PF07714,Protein tyrosine kinase;PF07679,Immunoglobulin I-set domain	IPR013783,Immunoglobulin-like fold;IPR001245,Serine-threonine/tyrosine-protein kinase, catalytic domain;IPR016248,Fibroblast growth factor receptor family;IPR020635,Tyrosine-protein kinase, catalytic domain;IPR036179,Immunoglobulin-like domain superfamily;IPR017441,Protein kinase, ATP binding site;IPR008266,Tyrosine-protein kinase, active site;IPR007110,Immunoglobulin-like domain;IPR003599,Immuno…	-	GO:0004713,molecular_function,protein tyrosine kinase activity;GO:0018108,biological_process,peptidyl-tyrosine phosphorylation;GO:0005007,molecular_function,fibroblast growth factor-activated receptor activity;GO:0004714,molecular_function,transmembrane receptor protein tyrosine kinase activity;GO:0008543,biological_process,fibroblast growth factor receptor signaling pathway;GO:0008284,biological…	-
FGFR3	NC_040049.1;NC_040049.1;NC_040049.1;NC_040049.1;NC_040049.1;NC_040049.1;NC_040049.1;NC_040049.1;NC_040049.1;NC_040049.1;NC_040049.1;NC_040049.1;NC_040049.1;NC_040049.1;NC_040049.1;NC_040049.1;NC_040049.1;NC_040049.1;NC_040049.1;NC_040049.1;NC_040049.1;NC_040049.1;NC_040049.1;NC_040049.1;NC_040049.1;NC_040049.1;NC_040049.1;NC_040049.1;NC_040049.1;NC_040049.1;NC_040049.1;NC_040049.1;NC_040049.1;NC_…	68207632;68210470;68210470;68210470;68210470;68210470;68210714;68210714;68210714;68210714;68210714;68210714;68211436;68211436;68211436;68211436;68211436;68211436;68213091;68213091;68213091;68213091;68213091;68213091;68214495;68214495;68214495;68214495;68214495;68214495;68215958;68215958;68215958;68215958;68215958;68215958;68216624;68216624;68216624;68216624;68216624;68216624;68217951;68217951;682…	68210634;68210634;68210634;68210634;68210634;68210634;68210819;68210819;68210819;68210819;68210819;68210819;68211573;68211573;68211573;68211573;68211573;68211573;68213161;68213161;68213161;68213161;68213161;68213161;68214617;68214617;68214617;68214617;68214617;68214617;68216148;68216148;68216148;68216148;68216148;68216148;68216734;68216734;68216734;68216734;68216734;68216734;68218072;68218072;682…	-;-;-;-;-;-;-;-;-;-;-;-;-;-;-;-;-;-;-;-;-;-;-;-;-;-;-;-;-;-;-;-;-;-;-;-;-;-;-;-;-;-;-;-;-;-;-;-;-;-;-;-;-;-;-;-;-;-;-;-;-;-;-;-;-;-;-;-;-;-;-;-;-;-;-;-;-;-;-;-;-;-;-;-;-;-;-;-;-;-;-;-;-;-;-;-;-;-;-;-;-;-;-;-;-;-;-	5734	2.694406471	3.465522848	3.008388097	22.51828353	22.12447607	23.78692097	9.58E-10	1.09E-06	-2.588086443	A0A1V4JF19,Fibroblast growth factor receptor	-	-	IPR013783,Immunoglobulin-like fold;IPR001245,Serine-threonine/tyrosine-protein kinase, catalytic domain;IPR016248,Fibroblast growth factor receptor family;IPR020635,Tyrosine-protein kinase, catalytic domain;IPR036179,Immunoglobulin-like domain superfamily;IPR017441,Protein kinase, ATP binding site;IPR008266,Tyrosine-protein kinase, active site;IPR007110,Immunoglobulin-like domain;IPR003599,Immuno…	-	GO:0016301,molecular_function,kinase activity;GO:0018108,biological_process,peptidyl-tyrosine phosphorylation;GO:0008543,biological_process,fibroblast growth factor receptor signaling pathway;GO:0016740,molecular_function,transferase activity;GO:0004714,molecular_function,transmembrane receptor protein tyrosine kinase activity;GO:0016310,biological_process,phosphorylation;GO:0004713,molecular_fun…	-
HAPLN1	NC_040075.1;NC_040075.1;NC_040075.1;NC_040075.1;NC_040075.1;NC_040075.1;NC_040075.1;NC_040075.1;NC_040075.1;NC_040075.1;NC_040075.1;NC_040075.1;NC_040075.1;NC_040075.1;NC_040075.1;NC_040075.1;NC_040075.1;NC_040075.1;NC_040075.1;NC_040075.1;NC_040075.1;NC_040075.1;NC_040075.1;NC_040075.1;NC_040075.1;NC_040075.1;NC_040075.1;NC_040075.1;NC_040075.1;NC_040075.1;NC_040075.1;NC_040075.1;NC_040075.1;NC_…	71949707;71949707;71949707;71949707;71949707;71949707;71949707;71958754;71958754;71958754;71958754;71958754;71958754;71958754;71968962;71968962;71968962;71968962;71968962;71968962;71968962;71978671;71978671;71978671;71978671;71978671;71978671;71978671;71980118;72006694;72006694;72006788;72006788;72006788;72007060;72007060;72007060	71951586;71951586;71951586;71951586;71951586;71951586;71951586;71959056;71959056;71959056;71959056;71959056;71959056;71959056;71969333;71969336;71969336;71969336;71969336;71969336;71969336;71978796;71978796;71978796;71978796;71978796;71978796;71978796;71980346;72007045;72006857;72007046;72006857;72007045;72007145;72007146;72007174	-;-;-;-;-;-;-;-;-;-;-;-;-;-;-;-;-;-;-;-;-;-;-;-;-;-;-;-;-;-;-;-;-;-;-;-;-	3381	0.506479779	0.675792437	0.696312229	28.63267808	20.70683491	24.09095625	7.62E-10	1.09E-06	-4.979167386	R0K8V6,Hyaluronan and proteoglycan link protein 1	XP_005012943.1,-;XP_005012942.1,hyaluronan and proteoglycan link protein 1 isoform X1	PF00193,xtracellular link domain;PF07686,Immunoglobulin V-set domain	IPR016187,C-type lectin fold;IPR007110,Immunoglobulin-like domain;IPR016186,C-type lectin-like/link domain superfamily;IPR003599,Immunoglobulin subtype;IPR036179,Immunoglobulin-like domain superfamily;IPR013783,Immunoglobulin-like fold;IPR000538,Link domain;IPR013106,Immunoglobulin V-set domain	-	GO:0031012,cellular_component,extracellular matrix;GO:0005540,molecular_function,hyaluronic acid binding;GO:0007155,biological_process,cell adhesion;GO:0005578,,	-
TP73	NC_040067.1;NC_040067.1;NC_040067.1;NC_040067.1;NC_040067.1;NC_040067.1;NC_040067.1;NC_040067.1;NC_040067.1;NC_040067.1;NC_040067.1;NC_040067.1;NC_040067.1;NC_040067.1;NC_040067.1;NC_040067.1;NC_040067.1;NC_040067.1;NC_040067.1;NC_040067.1;NC_040067.1;NC_040067.1;NC_040067.1;NC_040067.1;NC_040067.1;NC_040067.1;NC_040067.1;NC_040067.1;NC_040067.1;NC_040067.1;NC_040067.1;NC_040067.1;NC_040067.1;NC_…	6881989;6881989;6881989;6881989;6884977;6884977;6884977;6884977;6886043;6886043;6886043;6886043;6886367;6886367;6886367;6886367;6886732;6886732;6886732;6886732;6887137;6887137;6887137;6887137;6887967;6887967;6887967;6887967;6888252;6888252;6888252;6888252;6888524;6888889;6889524;6889524;6889524;6889890;6889890;6889890;6905096;6905096;6905096;6910402;6913322;6913322;6914153;6914153;6916736;6918960	6883065;6883065;6883065;6883065;6885070;6885070;6885070;6885070;6886175;6886175;6886175;6886175;6886521;6886521;6886521;6886521;6886856;6886856;6886856;6886856;6887225;6887225;6887225;6887225;6888109;6888109;6888109;6888109;6888361;6888361;6888361;6888361;6888639;6889430;6889639;6889639;6889639;6890076;6890076;6890076;6905341;6905341;6905341;6910679;6913445;6913445;6914248;6914248;6916874;6920422	-;-;-;-;-;-;-;-;-;-;-;-;-;-;-;-;-;-;-;-;-;-;-;-;-;-;-;-;-;-;-;-;-;-;-;-;-;-;-;-;-;-;-;-;-;-;-;-;-;-	5233	0.225426894	0.238158633	0.220851083	5.665111785	4.784821157	5.602165421	1.10E-09	1.09E-06	-4.230953716	U3I844,Tumor protein p73	-	PF00870,P53 DNA-binding domain;PF07647,SAM domain (Sterile alpha motif);PF07710,P53 tetramerisation motif	IPR002117,p53 tumour suppressor family;IPR013761,Sterile alpha motif/pointed domain superfamily;IPR011615,p53, DNA-binding domain;IPR037612,Tumour protein p73, SAM domain;IPR008967,p53-like transcription factor, DNA-binding;IPR001660,Sterile alpha motif domain;IPR032646,Tumour protein p73;IPR012346,p53/RUNT-type transcription factor, DNA-binding domain superfamily;IPR010991,p53, tetramerisation d…	-	GO:0019901,molecular_function,protein kinase binding;GO:0030054,cellular_component,cell junction;GO:0006355,biological_process,regulation of transcription, DNA-templated;GO:0044212,molecular_function,transcription regulatory region DNA binding;GO:0005634,cellular_component,nucleus;GO:0005794,cellular_component,Golgi apparatus;GO:0008134,molecular_function,transcription factor binding;GO:0003700,m…	-
TWIST1	NC_040047.1;NC_040047.1;NC_040047.1;NC_040047.1	31794622;31794622;31795874;31795874	31795351;31795774;31796477;31796477	-;-;-;-	1757	1.775975044	2.42352728	2.192589107	26.15534659	27.18989795	29.14797726	1.02E-09	1.09E-06	-3.37682795	A0A287CV12,Twist family bHLH transcription factor 1	-	-	IPR011598,Myc-type, basic helix-loop-helix (bHLH) domain;IPR036638,Helix-loop-helix DNA-binding domain superfamily;IPR015789,Twist-related	-	GO:0046983,molecular_function,protein dimerization activity	-
VIT	NC_040048.1;NC_040048.1;NC_040048.1;NC_040048.1;NC_040048.1;NC_040048.1;NC_040048.1;NC_040048.1;NC_040048.1;NC_040048.1;NC_040048.1;NC_040048.1;NC_040048.1;NC_040048.1;NC_040048.1;NC_040048.1;NC_040048.1;NC_040048.1;NC_040048.1	30721774;30737248;30739079;30739661;30742172;30746475;30749383;30751242;30752147;30757091;30757225;30757861;30762072;30766176;30768057;30768942;30769571;30771605;30772728	30722185;30737317;30739144;30739817;30742305;30746552;30749463;30751451;30752197;30757129;30757281;30757923;30762119;30766238;30768204;30769045;30769797;30772118;30775920	+;+;+;+;+;+;+;+;+;+;+;+;+;+;+;+;+;+;+	5715	0.026634131	0.024230274	0.052428606	4.062635051	3.934456667	4.231461207	1.08E-09	1.09E-06	-6.578800792	U3IWJ6,Vitrin	-	PF00092,von Willebrand factor type A domain;PF03815,LCCL domain	IPR004043,LCCL domain;IPR030763,Vitrin;IPR036609,LCCL domain superfamily;IPR036465,von Willebrand factor A-like domain superfamily;IPR002035,von Willebrand factor, type A	-	GO:0005614,cellular_component,interstitial matrix;GO:0010811,biological_process,positive regulation of cell-substrate adhesion;GO:0005539,molecular_function,glycosaminoglycan binding;GO:0005578,,;GO:0030198,biological_process,extracellular matrix organization	-
WIF1	NC_040046.1;NC_040046.1;NC_040046.1;NC_040046.1;NC_040046.1;NC_040046.1;NC_040046.1;NC_040046.1;NC_040046.1;NC_040046.1	167384341;167384661;167405371;167408633;167412702;167414107;167415601;167419751;167420406;167422765	167384570;167384800;167405479;167408773;167412797;167414202;167415696;167419846;167420501;167423594	+;+;+;+;+;+;+;+;+;+	1930	0.315469547	0.466369995	0.554458702	23.83350721	27.03131087	33.60021043	6.71E-10	1.09E-06	-5.668031518	A0A1D5PHP9,WNT inhibitory factor 1	NP_001186536.2,wnt inhibitory factor 1 precursor	-	IPR013032,EGF-like, conserved site;IPR013309,Wnt inhibitory factor (WIF)-1;IPR003306,WIF domain;IPR038677,WIF domain superfamily;IPR000742,EGF-like domain	-	-	K01691,ko04310,Wnt signaling pathway
CACNA1S	NC_040072.1;NC_040072.1;NC_040072.1;NC_040072.1;NC_040072.1;NC_040072.1;NC_040072.1;NC_040072.1;NC_040072.1;NC_040072.1;NC_040072.1;NC_040072.1;NC_040072.1;NC_040072.1;NC_040072.1;NC_040072.1;NC_040072.1;NC_040072.1;NC_040072.1;NC_040072.1;NC_040072.1;NC_040072.1;NC_040072.1;NC_040072.1;NC_040072.1;NC_040072.1;NC_040072.1;NC_040072.1;NC_040072.1;NC_040072.1;NC_040072.1;NC_040072.1;NC_040072.1;NC_…	4559948;4560526;4560775;4561094;4561818;4562558;4563114;4563339;4564331;4565167;4565728;4566171;4566763;4567379;4567616;4568852;4570781;4571004;4571653;4572119;4572589;4572964;4573396;4573822;4574195;4574891;4575547;4575852;4576206;4576624;4576832;4577450;4577873;4578411;4579012;4579762;4580054;4581529;4582175;4582661;4583186;4583833;4588622;4593622	4560393;4560606;4560884;4561158;4562008;4562686;4563238;4563440;4564433;4565263;4565855;4566330;4566854;4567444;4567744;4568908;4570864;4571114;4571811;4572320;4572735;4573016;4573503;4573909;4574301;4574950;4575676;4575984;4576275;4576717;4576946;4577570;4578080;4578636;4579172;4579843;4580202;4581632;4582380;4582813;4583319;4583972;4588727;4593926	-;-;-;-;-;-;-;-;-;-;-;-;-;-;-;-;-;-;-;-;-;-;-;-;-;-;-;-;-;-;-;-;-;-;-;-;-;-;-;-;-;-;-;-	5837	38.13174639	39.54169887	40.95623142	9.98550379	10.48727947	10.07241389	1.38E-09	1.12E-06	2.270962436	A0A1D5PV02,Voltage-dependent L-type calcium channel subunit alpha	-	-	IPR002077,Voltage-dependent calcium channel, alpha-1 subunit;IPR014873,Voltage-dependent calcium channel, alpha-1 subunit, IQ domain;IPR005446,Voltage-dependent calcium channel, L-type, alpha-1 subunit;IPR031649,Voltage-dependent L-type calcium channel, IQ-associated domain;IPR005450,Voltage-dependent calcium channel, L-type, alpha-1S subunit;IPR031688,Voltage-gated calcium channel subunit alpha,…	-	GO:0005216,molecular_function,ion channel activity;GO:0005262,molecular_function,calcium channel activity;GO:0005245,molecular_function,voltage-gated calcium channel activity;GO:0005891,cellular_component,voltage-gated calcium channel complex;GO:0055085,biological_process,transmembrane transport;GO:0006811,biological_process,ion transport;GO:0005244,molecular_function,voltage-gated ion channel ac…	-
CDH3	NC_040056.1;NC_040056.1;NC_040056.1;NC_040056.1;NC_040056.1;NC_040056.1;NC_040056.1;NC_040056.1;NC_040056.1;NC_040056.1;NC_040056.1;NC_040056.1;NC_040056.1;NC_040056.1;NC_040056.1;NC_040056.1;NC_040056.1;NC_040056.1;NC_040056.1;NC_040056.1;NC_040056.1;NC_040056.1;NC_040056.1;NC_040056.1;NC_040056.1;NC_040056.1;NC_040056.1;NC_040056.1;NC_040056.1;NC_040056.1;NC_040056.1;NC_040056.1;NC_040056.1;NC_…	20778718;20778718;20778718;20779088;20779088;20779088;20779303;20779303;20779303;20779512;20779512;20779512;20779816;20779816;20779816;20780244;20780244;20780244;20780469;20780469;20780469;20780795;20781054;20781277;20781824;20781824;20782082;20782082;20782306;20782306;20782633;20782633;20782877;20782877;20783259;20783465;20784095;20784300;20784399;20786124;20786124	20779010;20779010;20779010;20779231;20779231;20779231;20779433;20779433;20779433;20779730;20779730;20779730;20780040;20780040;20780040;20780386;20780386;20780386;20780713;20780713;20780713;20780980;20781182;20781471;20782009;20782009;20782210;20782210;20782481;20782481;20782777;20782777;20783032;20783032;20783369;20783619;20784205;20784439;20784413;20786306;20786306	-;-;-;-;-;-;-;-;-;-;-;-;-;-;-;-;-;-;-;-;-;-;-;-;-;-;-;-;-;-;-;-;-;-;-;-;-;-;-;-;-	3402	0.078299412	0.081408591	0.17614902	14.78063375	11.62391168	15.07736753	1.55E-09	1.12E-06	-6.654970268	A0A1L7H9G2,CDH3	-	-	IPR020894,Cadherin conserved site;IPR002126,Cadherin;IPR015919,Cadherin-like;IPR000233,Cadherin, cytoplasmic domain;IPR027397,Catenin binding domain superfamily	-	GO:0007155,biological_process,cell adhesion;GO:0007156,biological_process,homophilic cell adhesion via plasma membrane adhesion molecules;GO:0005509,molecular_function,calcium ion binding;GO:0005886,cellular_component,plasma membrane;GO:0016020,cellular_component,membrane;GO:0016021,cellular_component,integral component of membrane	-
COL19A1	NC_040048.1;NC_040048.1;NC_040048.1;NC_040048.1;NC_040048.1;NC_040048.1;NC_040048.1;NC_040048.1;NC_040048.1;NC_040048.1;NC_040048.1;NC_040048.1;NC_040048.1;NC_040048.1;NC_040048.1;NC_040048.1;NC_040048.1;NC_040048.1;NC_040048.1;NC_040048.1;NC_040048.1;NC_040048.1;NC_040048.1;NC_040048.1;NC_040048.1;NC_040048.1;NC_040048.1;NC_040048.1;NC_040048.1;NC_040048.1;NC_040048.1;NC_040048.1;NC_040048.1;NC_…	87673608;87673608;87673608;87673608;87673608;87673608;87673608;87673608;87673608;87679531;87679531;87679531;87679531;87679531;87679531;87679531;87679531;87679531;87681558;87686089;87686089;87686089;87686089;87686089;87686089;87686089;87686089;87686089;87686089;87688054;87688054;87688054;87688054;87688054;87688054;87688054;87688054;87688054;87688054;87689329;87689329;87689329;87689329;87689329;876…	87679294;87679294;87679294;87679294;87679294;87679294;87679294;87679294;87679294;87679608;87679608;87679608;87679608;87679608;87679608;87679608;87679608;87679608;87685223;87686244;87686244;87686244;87686244;87686244;87686244;87686244;87686244;87686244;87686244;87688120;87688120;87688120;87688120;87688120;87688120;87688120;87688120;87688120;87688120;87689499;87689499;87689499;87689499;87689499;876…	-;-;-;-;-;-;-;-;-;-;-;-;-;-;-;-;-;-;-;-;-;-;-;-;-;-;-;-;-;-;-;-;-;-;-;-;-;-;-;-;-;-;-;-;-;-;-;-;-;-;-;-;-;-;-;-;-;-;-;-;-;-;-;-;-;-;-;-;-;-;-;-;-;-;-;-;-;-;-;-;-;-;-;-;-;-;-;-;-;-;-;-;-;-;-;-;-;-;-;-;-;-;-;-;-;-;-;-;-;-;-;-;-;-;-;-;-;-;-;-;-;-;-;-;-;-;-;-;-;-;-;-;-;-;-;-;-;-;-;-;-;-;-;-;-;-;-;-;-;-;-;-;-;-;-;-;-;-;-;-;-;-;-;-;-;-;-;-;-;-;-;-;-;-;-;-;-;-;-;-;-;-;-;-;-;-;-;-;-;-;-;-;-;-;-;-;-;-;-;-…	13578	17.25552261	15.36667654	14.71572106	2.102843255	2.348202958	2.244745317	1.65E-09	1.12E-06	3.140857202	U3J6B8,Collagen type XIX alpha 1 chain	-	PF01391,Collagen triple helix repeat (20 copies)	IPR008160,Collagen triple helix repeat;IPR001791,Laminin G domain;IPR013320,Concanavalin A-like lectin/glucanase domain superfamily	-	GO:0030198,biological_process,extracellular matrix organization;GO:0007519,biological_process,skeletal muscle tissue development	-
DOK5	NC_040066.1;NC_040066.1;NC_040066.1;NC_040066.1;NC_040066.1;NC_040066.1;NC_040066.1;NC_040066.1;NC_040066.1;NC_040066.1;NC_040066.1;NC_040066.1;NC_040066.1;NC_040066.1;NC_040066.1;NC_040066.1;NC_040066.1;NC_040066.1;NC_040066.1;NC_040066.1;NC_040066.1;NC_040066.1;NC_040066.1;NC_040066.1;NC_040066.1;NC_040066.1;NC_040066.1;NC_040066.1;NC_040066.1;NC_040066.1;NC_040066.1;NC_040066.1;NC_040066.1;NC_…	9088501;9090733;9090755;9090760;9090803;9090815;9090821;9090846;9094597;9094743;9109043;9113274;9113274;9113274;9113274;9113274;9113274;9113274;9113274;9113274;9113274;9113274;9124174;9124174;9124174;9124174;9124174;9124174;9124174;9124174;9124174;9124174;9124174;9124368;9124368;9124368;9124368;9124368;9124368;9124368;9124368;9124389;9124389;9124389;9125251;9125251;9125251;9125251;9125251;9125251…	9088576;9091310;9091310;9091310;9091310;9091310;9091310;9091310;9094615;9094762;9109061;9113381;9113381;9113381;9113381;9113381;9113381;9113381;9113381;9113381;9113381;9113381;9124288;9124288;9124288;9124288;9124288;9124288;9124288;9124288;9124288;9124288;9124288;9124508;9124508;9124508;9124508;9124508;9124508;9124508;9124508;9124508;9124508;9124508;9125440;9125440;9125440;9125440;9125440;9125440…	+;+;+;+;+;+;+;+;+;+;+;+;+;+;+;+;+;+;+;+;+;+;+;+;+;+;+;+;+;+;+;+;+;+;+;+;+;+;+;+;+;+;+;+;+;+;+;+;+;+;+;+;+;+;+;+;+;+;+;+;+;+;+;+;+;+;+;+;+;+;+;+;+;+;+;+;+;+;+;+;+;+;+;+;+;+;+;+;+;+;+;+;+;+;+;+;+	2255	27.69215812	27.48027329	24.84732294	2.229876542	1.965962412	1.63617807	1.55E-09	1.12E-06	4.092343249	A0A0Q3XC28,Docking protein 5 isoform X1	-	PF02174,PTB domain (IRS-1 type)	IPR002404,IRS-type PTB domain;IPR037816,DOK4/5/6, PH domain;IPR001849,Pleckstrin homology domain;IPR011993,PH-like domain superfamily	-	-	-
EPCAM	NC_040048.1;NC_040048.1;NC_040048.1;NC_040048.1;NC_040048.1;NC_040048.1;NC_040048.1;NC_040048.1;NC_040048.1	19852676;19855703;19856144;19856502;19856955;19858006;19858375;19859245;19859800	19855075;19855744;19856341;19856603;19857018;19858071;19858615;19859349;19860165	-;-;-;-;-;-;-;-;-	3584	0.339763518	0.405691447	0.406066741	11.32164414	9.480019954	9.030146998	1.64E-09	1.12E-06	-4.383306686	U3J672,Epithelial cell adhesion molecule	-	PF00086,Thyroglobulin type-1 repeat	IPR036857,Thyroglobulin type-1 superfamily;IPR000716,Thyroglobulin type-1	-	GO:0023019,biological_process,signal transduction involved in regulation of gene expression;GO:2000048,biological_process,negative regulation of cell-cell adhesion mediated by cadherin;GO:0009986,cellular_component,cell surface;GO:0005923,cellular_component,bicellular tight junction;GO:0048863,biological_process,stem cell differentiation;GO:2000648,biological_process,positive regulation of stem c…	-
HHATL	NC_040047.1;NC_040047.1;NC_040047.1;NC_040047.1;NC_040047.1;NC_040047.1;NC_040047.1;NC_040047.1;NC_040047.1;NC_040047.1;NC_040047.1;NC_040047.1;NC_040047.1;NC_040047.1;NC_040047.1;NC_040047.1;NC_040047.1;NC_040047.1;NC_040047.1;NC_040047.1;NC_040047.1;NC_040047.1;NC_040047.1;NC_040047.1;NC_040047.1;NC_040047.1;NC_040047.1;NC_040047.1;NC_040047.1;NC_040047.1;NC_040047.1	2744459;2744461;2745009;2745508;2746037;2746037;2746403;2746403;2746403;2746645;2746645;2746645;2747519;2747519;2747519;2750129;2750129;2750129;2751734;2751734;2751734;2752235;2752235;2752235;2753011;2753011;2753011;2754431;2754431;2754431;2756792	2744700;2744700;2745076;2745729;2746104;2746104;2746516;2746516;2746516;2746839;2746839;2746839;2747728;2747728;2747728;2750300;2750300;2750300;2751878;2751878;2751878;2752270;2752270;2752270;2753212;2753212;2753212;2754706;2754572;2754706;2758503	+;+;+;+;+;+;+;+;+;+;+;+;+;+;+;+;+;+;+;+;+;+;+;+;+;+;+;+;+;+;+	3662	23.60938938	31.35751901	29.59592142	5.599948429	5.48163147	5.629036508	1.53E-09	1.12E-06	2.647185892	R0LAV8,Hedgehog acyltransferase like	XP_005023302.1,protein-cysteine N-palmitoyltransferase HHAT-like protein	PF03062,MBOAT, membrane-bound O-acyltransferase family	IPR004299,Membrane bound O-acyl transferase, MBOAT;IPR032980,Protein-cysteine N-palmitoyltransferase HHAT-like protein	-	GO:0060262,biological_process,negative regulation of N-terminal protein palmitoylation;GO:0016740,molecular_function,transferase activity;GO:0005783,cellular_component,endoplasmic reticulum;GO:0048471,cellular_component,perinuclear region of cytoplasm;GO:0016020,cellular_component,membrane;GO:0016021,cellular_component,integral component of membrane	-
STAC3	NC_040073.1;NC_040073.1;NC_040073.1;NC_040073.1;NC_040073.1;NC_040073.1;NC_040073.1;NC_040073.1;NC_040073.1;NC_040073.1;NC_040073.1;NC_040073.1;NC_040073.1;NC_040073.1;NC_040073.1;NC_040073.1;NC_040073.1;NC_040073.1;NC_040073.1;NC_040073.1;NC_040073.1;NC_040073.1;NC_040073.1;NC_040073.1;NC_040073.1;NC_040073.1;NC_040073.1;NC_040073.1;NC_040073.1;NC_040073.1;NC_040073.1;NC_040073.1;NC_040073.1;NC_…	5980203;5980203;5980203;5980203;5980203;5980858;5980858;5980858;5980858;5980858;5981211;5981211;5981211;5981211;5981211;5981756;5981756;5981756;5981756;5981756;5981973;5981973;5981973;5981973;5981973;5982231;5982231;5982231;5982231;5982231;5982396;5982396;5982396;5982396;5982396;5982577;5982577;5982577;5982577;5982577;5982910;5982910;5982910;5982910;5982910;5983152;5983152;5983152;5983152;5983152…	5980660;5980660;5980660;5980660;5980660;5980995;5980995;5980995;5980995;5980995;5981262;5981262;5981262;5981262;5981262;5981859;5981859;5981859;5981859;5981859;5982022;5982022;5982022;5982022;5982022;5982297;5982297;5982297;5982297;5982297;5982493;5982493;5982490;5982493;5982490;5982652;5982652;5982652;5982652;5982652;5983007;5983007;5983007;5983007;5983007;5983410;5983410;5983413;5983413;5983410…	-;-;-;-;-;-;-;-;-;-;-;-;-;-;-;-;-;-;-;-;-;-;-;-;-;-;-;-;-;-;-;-;-;-;-;-;-;-;-;-;-;-;-;-;-;-;-;-;-;-;-;-;-;-;-;-;-;-;-	1808	178.6705093	195.2680297	188.1680726	52.43126989	51.51195575	52.34833382	1.48E-09	1.12E-06	2.159629449	U3I8X2,SH3 and cysteine rich domain 3	-	PF00130,Phorbol esters/diacylglycerol binding domain (C1 domain);PF07653,Variant SH3 domain;PF00018,SH3 domain;PF16664,Unstructured on SH3 and cysteine-rich domain-containing protein 2	IPR001452,SH3 domain;IPR035736,Stac3, first SH3 domain;IPR036028,SH3-like domain superfamily;IPR002219,Protein kinase C-like, phorbol ester/diacylglycerol-binding domain	-	GO:1903078,biological_process,positive regulation of protein localization to plasma membrane;GO:0035556,biological_process,intracellular signal transduction;GO:1901387,biological_process,positive regulation of voltage-gated calcium channel activity;GO:0046872,molecular_function,metal ion binding;GO:0005891,cellular_component,voltage-gated calcium channel complex;GO:0031234,cellular_component,extr…	-
RSPO1	NC_040069.1;NC_040069.1;NC_040069.1;NC_040069.1;NC_040069.1;NC_040069.1;NC_040069.1;NC_040069.1;NC_040069.1;NC_040069.1;NC_040069.1;NC_040069.1;NC_040069.1;NC_040069.1;NC_040069.1;NC_040069.1;NC_040069.1;NC_040069.1;NC_040069.1;NC_040069.1;NC_040069.1;NC_040069.1;NC_040069.1;NC_040069.1;NC_040069.1;NC_040069.1;NC_040069.1	1946517;1946517;1946517;1946517;1949593;1949593;1949593;1949593;1950192;1950192;1950192;1950192;1951082;1951082;1951082;1951082;1953075;1953075;1953075;1953075;1960349;1960857;1960857;1961116;1961317;1961317;1973592	1948963;1948963;1948963;1948963;1949781;1949781;1949781;1949781;1950341;1950341;1950341;1950341;1951273;1951273;1951273;1951273;1953465;1953465;1953465;1953465;1960798;1961191;1960977;1961191;1961394;1961394;1973754	-;-;-;-;-;-;-;-;-;-;-;-;-;-;-;-;-;-;-;-;-;-;-;-;-;-;-	4395	0.216459124	0.196922659	0.233743136	11.71968492	14.94492866	10.07394279	1.95E-09	1.21E-06	-5.516978372	U3IFS4,R-spondin 1	XP_005025376.1,R-spondin-1	PF15913,urin-like repeat, cysteine-rich	IPR000884,Thrombospondin type-1 (TSP1) repeat;IPR009030,Growth factor receptor cysteine-rich domain superfamily;IPR006212,Furin-like repeat;IPR036383,Thrombospondin type-1 (TSP1) repeat superfamily	-	GO:0001664,molecular_function,G-protein coupled receptor binding;GO:0005102,molecular_function,signaling receptor binding;GO:0030177,biological_process,positive regulation of Wnt signaling pathway;GO:0002090,biological_process,regulation of receptor internalization;GO:0090263,biological_process,positive regulation of canonical Wnt signaling pathway;GO:0001934,biological_process,positive regulatio…	-
TBX5	NC_040061.1;NC_040061.1;NC_040061.1;NC_040061.1;NC_040061.1;NC_040061.1;NC_040061.1;NC_040061.1;NC_040061.1;NC_040061.1;NC_040061.1;NC_040061.1;NC_040061.1;NC_040061.1;NC_040061.1;NC_040061.1;NC_040061.1;NC_040061.1;NC_040061.1;NC_040061.1;NC_040061.1;NC_040061.1;NC_040061.1;NC_040061.1;NC_040061.1;NC_040061.1;NC_040061.1	8352275;8352275;8352275;8361259;8361259;8361259;8372033;8372033;8372033;8379686;8379686;8379686;8382016;8382016;8382016;8382775;8382775;8382775;8385436;8385436;8385436;8386518;8386518;8386518;8386801;8388922;8478020	8353338;8353338;8353338;8361485;8361485;8361485;8372124;8372124;8372124;8379838;8379838;8379838;8382163;8382163;8382163;8382894;8382894;8382894;8385530;8385530;8385530;8386693;8386693;8386693;8386892;8389286;8478135	-;-;-;-;-;-;-;-;-;-;-;-;-;-;-;-;-;-;-;-;-;-;-;-;-;-;-	2648	3.40584699	4.026681676	4.31598359	32.69465314	29.11744758	32.42559641	1.88E-09	1.21E-06	-2.693451785	A0A1V4JR48,T-box transcription factor TBX5	-	-	IPR001699,Transcription factor, T-box;IPR036960,T-box superfamily;IPR008967,p53-like transcription factor, DNA-binding;IPR018186,Transcription factor, T-box, conserved site	-	GO:0006355,biological_process,regulation of transcription, DNA-templated;GO:0003700,molecular_function,DNA binding transcription factor activity;GO:0003677,molecular_function,DNA binding;GO:0005634,cellular_component,nucleus;GO:0006351,biological_process,transcription, DNA-templated	-
ADAMTS20	NC_040046.1;NC_040046.1;NC_040046.1;NC_040046.1;NC_040046.1;NC_040046.1;NC_040046.1;NC_040046.1;NC_040046.1;NC_040046.1;NC_040046.1;NC_040046.1;NC_040046.1;NC_040046.1;NC_040046.1;NC_040046.1;NC_040046.1;NC_040046.1;NC_040046.1;NC_040046.1;NC_040046.1;NC_040046.1;NC_040046.1;NC_040046.1;NC_040046.1;NC_040046.1;NC_040046.1;NC_040046.1;NC_040046.1;NC_040046.1;NC_040046.1;NC_040046.1;NC_040046.1;NC_…	171466936;171470878;171473341;171473341;171473341;171473341;171473341;171473774;171473774;171473774;171473774;171473774;171473774;171473994;171478093;171487704;171487704;171487704;171487704;171487704;171487704;171487704;171493116;171493116;171493116;171493116;171493116;171493116;171493116;171503420;171503420;171503420;171503420;171503420;171503420;171503420;171504192;171504192;171504192;171504192…	171467028;171473579;171473579;171473579;171473579;171473579;171473579;171474120;171474120;171474120;171474120;171474120;171474120;171474120;171478197;171487866;171487866;171487866;171487866;171487866;171487866;171487866;171493378;171493378;171493378;171493378;171493378;171493378;171493378;171503503;171503503;171503503;171503503;171503503;171503503;171503503;171504316;171504316;171504316;171504316…	+;+;+;+;+;+;+;+;+;+;+;+;+;+;+;+;+;+;+;+;+;+;+;+;+;+;+;+;+;+;+;+;+;+;+;+;+;+;+;+;+;+;+;+;+;+;+;+;+;+;+;+;+;+;+;+;+;+;+;+;+;+;+;+;+;+;+;+;+;+;+;+;+;+;+;+;+;+;+;+;+;+;+;+;+;+;+;+;+;+;+;+;+;+;+;+;+;+;+;+;+;+;+;+;+;+;+;+;+;+;+;+;+;+;+;+;+;+;+;+;+;+;+;+;+;+;+;+;+;+;+;+;+;+;+;+;+;+;+;+;+;+;+;+;+;+;+;+;+;+;+;+;+;+;+;+;+;+;+;+;+;+;+;+;+;+;+;+;+;+;+;+;+;+;+;+;+;+;+;+;+;+;+;+;+;+;+;+;+;+;+;+;+;+;+;+;+;+;+;+…	10217	17.79952468	19.44587071	20.75901628	4.733269779	5.01598463	4.592527385	2.24E-09	1.29E-06	2.326833995	A0A1D5P8Z5,ADAM metallopeptidase with thrombospondin type 1 motif 20	XP_015137930.1,A disintegrin and metalloproteinase with thrombospondin motifs 20 isoform X1	-	IPR010294,ADAM-TS Spacer 1;IPR000884,Thrombospondin type-1 (TSP1) repeat;IPR001590,Peptidase M12B, ADAM/reprolysin;IPR024079,Metallopeptidase, catalytic domain superfamily;IPR012314,Peptidase M12B, GON-ADAMTSs;IPR002870,Peptidase M12B, propeptide;IPR036383,Thrombospondin type-1 (TSP1) repeat superfamily	-	GO:0006508,biological_process,proteolysis;GO:0046872,molecular_function,metal ion binding;GO:0004222,molecular_function,metalloendopeptidase activity;GO:0008270,molecular_function,zinc ion binding;GO:0008237,molecular_function,metallopeptidase activity	-
ETV4	NC_040073.1;NC_040073.1;NC_040073.1;NC_040073.1;NC_040073.1;NC_040073.1;NC_040073.1;NC_040073.1;NC_040073.1;NC_040073.1;NC_040073.1;NC_040073.1;NC_040073.1;NC_040073.1;NC_040073.1;NC_040073.1;NC_040073.1;NC_040073.1;NC_040073.1;NC_040073.1;NC_040073.1;NC_040073.1;NC_040073.1;NC_040073.1;NC_040073.1;NC_040073.1;NC_040073.1;NC_040073.1;NC_040073.1;NC_040073.1;NC_040073.1;NC_040073.1;NC_040073.1;NC_…	4306767;4306767;4306811;4306811;4306811;4306811;4306811;4306811;4306811;4307136;4307136;4307136;4307136;4307136;4307136;4307136;4307136;4307136;4307334;4307334;4307334;4307334;4307334;4307337;4307337;4307337;4307337;4307571;4307571;4307571;4307606;4307606;4307606;4307606;4307606;4307606;4307796;4309677;4312811;4312811;4312811;4312811;4312811;4312811;4312811;4312811;4312811;4312811;4312811;4314261…	4306920;4306920;4306920;4307034;4306920;4307034;4306920;4307015;4307015;4307230;4307230;4307230;4307230;4307230;4307230;4307230;4307230;4307230;4307430;4307430;4307430;4307430;4307430;4307430;4307430;4307430;4307430;4307653;4307653;4307653;4307653;4307653;4307653;4307653;4307653;4307653;4307832;4312122;4312864;4312864;4312864;4312864;4312864;4312864;4312864;4312864;4312864;4312864;4312864;4314366…	+;+;+;+;+;+;+;+;+;+;+;+;+;+;+;+;+;+;+;+;+;+;+;+;+;+;+;+;+;+;+;+;+;+;+;+;+;+;+;+;+;+;+;+;+;+;+;+;+;+;+;+;+;+;+;+;+;+;+;+;+;+;+;+;+;+;+;+;+;+;+;+;+;+;+;+;+;+;+;+;+;+;+;+;+;+;+;+;+;+;+;+;+;+;+;+;+;+;+;+;+;+;+;+;+;+;+;+;+;+;+;+;+;+;+;+;+;+;+;+;+;+;+;+;+;+;+;+;+;+;+;+;+;+	5972	1.11509795	1.031845717	1.218472204	9.649951619	10.56496086	10.96618762	2.18E-09	1.29E-06	-2.896239859	U3I4N0,ETS variant 4	-	PF04621,PEA3 subfamily ETS-domain transcription factor N terminal domain;PF00178,ts-domain	IPR006715,PEA3-type ETS-domain transcription factor, N-terminal;IPR036390,Winged helix DNA-binding domain superfamily;IPR036388,Winged helix-like DNA-binding domain superfamily;IPR000418,Ets domain	-	GO:0003677,molecular_function,DNA binding;GO:0005730,cellular_component,nucleolus;GO:0043565,molecular_function,sequence-specific DNA binding;GO:0003700,molecular_function,DNA binding transcription factor activity;GO:0045944,biological_process,positive regulation of transcription by RNA polymerase II;GO:0006355,biological_process,regulation of transcription, DNA-templated;GO:0000978,molecular_fun…	-
TP63	NC_040054.1;NC_040054.1;NC_040054.1;NC_040054.1;NC_040054.1;NC_040054.1;NC_040054.1;NC_040054.1;NC_040054.1;NC_040054.1;NC_040054.1;NC_040054.1;NC_040054.1;NC_040054.1;NC_040054.1;NC_040054.1;NC_040054.1;NC_040054.1;NC_040054.1;NC_040054.1;NC_040054.1;NC_040054.1;NC_040054.1;NC_040054.1;NC_040054.1;NC_040054.1;NC_040054.1;NC_040054.1;NC_040054.1;NC_040054.1;NC_040054.1;NC_040054.1;NC_040054.1;NC_…	11110218;11110222;11110223;11110223;11162077;11162077;11162077;11162077;11175939;11176695;11180080;11180080;11180080;11180080;11180080;11180080;11180960;11180960;11180960;11180960;11180960;11180960;11184334;11195306;11212552;11212552;11212552;11212552;11212552;11212552;11212552;11212552;11242412;11242412;11242412;11242412;11242412;11242412;11242412;11242412;11244279;11244279;11244279;11244279;112…	11110294;11110294;11110294;11110294;11162745;11162745;11162745;11162745;11176080;11176845;11180208;11180208;11180208;11180208;11180208;11180208;11181092;11181092;11181092;11181092;11181092;11181092;11184539;11195494;11212806;11212806;11212806;11212806;11212806;11212806;11212806;11212806;11242598;11242598;11242598;11242598;11242598;11242598;11242598;11242598;11244394;11244394;11244394;11244394;112…	+;+;+;+;+;+;+;+;+;+;+;+;+;+;+;+;+;+;+;+;+;+;+;+;+;+;+;+;+;+;+;+;+;+;+;+;+;+;+;+;+;+;+;+;+;+;+;+;+;+;+;+;+;+;+;+;+;+;+;+;+;+;+;+;+;+;+;+;+;+;+;+;+;+;+;+;+;+;+;+;+;+;+;+;+;+;+;+;+;+;+;+;+;+;+;+;+;+;+;+;+;+;+;+;+;+;+;+	10281	0.318315554	0.397339015	0.324747449	4.72081677	4.156841174	4.279179997	2.40E-09	1.33E-06	-3.346155803	A0A093K3B8,Tumor protein 63	XP_009680435.1,tumor protein 63	PF00870,P53 DNA-binding domain;PF07647,SAM domain (Sterile alpha motif);PF07710,P53 tetramerisation motif	IPR002117,p53 tumour suppressor family;IPR013761,Sterile alpha motif/pointed domain superfamily;IPR011615,p53, DNA-binding domain;IPR008967,p53-like transcription factor, DNA-binding;IPR001660,Sterile alpha motif domain;IPR032645,Tumour protein p63;IPR012346,p53/RUNT-type transcription factor, DNA-binding domain superfamily;IPR037611,Tumour protein p63, SAM domain;IPR010991,p53, tetramerisation d…	-	GO:0051262,biological_process,protein tetramerization;GO:0006915,biological_process,apoptotic process;GO:0003677,molecular_function,DNA binding;GO:0003700,molecular_function,DNA binding transcription factor activity;GO:0006355,biological_process,regulation of transcription, DNA-templated;GO:0032502,biological_process,developmental process;GO:0044212,molecular_function,transcription regulatory reg…	-
KLHL41	NC_040052.1;NC_040052.1;NC_040052.1;NC_040052.1;NC_040052.1;NC_040052.1	23746943;23748770;23750028;23751634;23751834;23753872	23747956;23748916;23750213;23751741;23751991;23755080	-;-;-;-;-;-	2822	201.1766039	195.1397905	209.3493023	46.60691394	50.8362211	48.57405221	2.61E-09	1.35E-06	2.367974834	U3IH32,Kelch like family member 41	-	PF01344,Kelch motif;PF00651,BTB/POZ domain;PF07707,BTB And C-terminal Kelch	IPR011705,BTB/Kelch-associated;IPR011333,SKP1/BTB/POZ domain superfamily;IPR015915,Kelch-type beta propeller;IPR017096,BTB-kelch protein;IPR006652,Kelch repeat type 1;IPR030571,Kelch-like protein 41;IPR000210,BTB/POZ domain	-	GO:0045214,biological_process,sarcomere organization;GO:0016567,biological_process,protein ubiquitination;GO:0005737,cellular_component,cytoplasm;GO:2000291,biological_process,regulation of myoblast proliferation;GO:0005634,cellular_component,nucleus;GO:0033017,cellular_component,sarcoplasmic reticulum membrane;GO:0031463,cellular_component,Cul3-RING ubiquitin ligase complex;GO:0005856,cellular_c…	-
REEP1	NC_040049.1;NC_040049.1;NC_040049.1;NC_040049.1;NC_040049.1;NC_040049.1;NC_040049.1;NC_040049.1;NC_040049.1;NC_040049.1;NC_040049.1;NC_040049.1;NC_040049.1;NC_040049.1;NC_040049.1;NC_040049.1;NC_040049.1;NC_040049.1;NC_040049.1;NC_040049.1;NC_040049.1;NC_040049.1;NC_040049.1;NC_040049.1;NC_040049.1;NC_040049.1;NC_040049.1;NC_040049.1;NC_040049.1;NC_040049.1;NC_040049.1;NC_040049.1;NC_040049.1;NC_…	70408722;70408722;70408722;70408722;70408722;70410790;70410790;70410790;70410790;70410790;70410836;70410836;70410928;70415356;70415356;70415356;70415356;70415892;70415892;70420528;70420528;70420528;70421543;70421543;70421543;70421543;70421543;70421543;70421543;70429621;70429621;70429621;70429621;70429621;70429621;70429621;70429621;70429621;70429621;70429621;70429621;70433864;70433864;70433864;704…	70409549;70409549;70409549;70409549;70409549;70410938;70410938;70410938;70410938;70410938;70410962;70410962;70410962;70415615;70415615;70415615;70415615;70416206;70416206;70420563;70420563;70420563;70421578;70421578;70421578;70421578;70421578;70421578;70421578;70429789;70429789;70429789;70429789;70429789;70429789;70429789;70429789;70429789;70429789;70429789;70429789;70433929;70433929;70433929;704…	-;-;-;-;-;-;-;-;-;-;-;-;-;-;-;-;-;-;-;-;-;-;-;-;-;-;-;-;-;-;-;-;-;-;-;-;-;-;-;-;-;-;-;-;-;-;-;-;-;-;-;-;-;-;-;-;-;-;-;-;-;-;-;-;-;-;-;-;-;-;-;-;-;-;-;-;-;-;-;-;-;-;-;-;-;-;-;-;-;-;-;-;-;-;-;-;-;-;-;-;-;-;-;-;-;-;-;-;-;-;-;-	2557	101.1238279	116.5835898	104.0726573	29.36088161	27.78190134	32.08959143	2.57E-09	1.35E-06	2.164578723	A0A1V4JFD3,Receptor expression-enhancing protein	-	-	IPR004345,TB2/DP1/HVA22-related protein	-	GO:0016021,cellular_component,integral component of membrane;GO:0016020,cellular_component,membrane	-
C4H4orf54	NC_040049.1;NC_040049.1;NC_040049.1	7181864;7184623;7184763	7184620;7184760;7188226	+;+;+	6359	30.32791464	41.62011036	36.34891392	7.95562051	7.769159451	7.832890533	3.27E-09	1.36E-06	2.507977937	R4GCL7,Uncharacterized protein	XP_008116483.1,serine-rich adhesin for platelets	PF15232,omain of unknown function (DUF4585)	IPR000286,Histone deacetylase superfamily;IPR027838,Domain of unknown function DUF4585	-	-	-
CLDN1	NC_040054.1;NC_040054.1;NC_040054.1;NC_040054.1	11380002;11382497;11382805;11390865	11382045;11382581;11382969;11391195	-;-;-;-	2625	2.11650021	2.281557183	2.348116761	28.18386667	24.17089747	22.80971119	3.31E-09	1.36E-06	-3.167786058	A0A091QZ92,Claudin	XP_009954786.1,claudin-1-like	PF00822,PMP-22/EMP/MP20/Claudin family	IPR006187,Claudin;IPR017974,Claudin, conserved site;IPR003548,Claudin-1;IPR004031,PMP-22/EMP/MP20/Claudin superfamily	-	GO:0030054,cellular_component,cell junction;GO:0005923,cellular_component,bicellular tight junction;GO:0005198,molecular_function,structural molecule activity;GO:0005886,cellular_component,plasma membrane;GO:0016020,cellular_component,membrane;GO:0016021,cellular_component,integral component of membrane	-
EEF1A2	NC_040066.1;NC_040066.1;NC_040066.1;NC_040066.1;NC_040066.1;NC_040066.1;NC_040066.1;NC_040066.1;NC_040066.1;NC_040066.1;NC_040066.1;NC_040066.1;NC_040066.1;NC_040066.1	13739759;13739759;13740863;13740863;13741965;13741965;13743543;13743543;13748187;13748187;13749345;13750566;13754574;13755999	13740179;13740179;13741097;13741097;13742221;13742221;13743693;13743693;13748483;13748483;13749556;13750745;13754787;13756152	-;-;-;-;-;-;-;-;-;-;-;-;-;-	2121	554.2608248	617.5599323	560.8744242	125.3614075	111.0464182	111.9550476	3.08E-09	1.36E-06	2.625832074	A0A218USF6,Elongation factor 1-alpha	-	-	IPR027417,P-loop containing nucleoside triphosphate hydrolase;IPR000795,Transcription factor, GTP-binding domain;IPR004161,Translation elongation factor EFTu-like, domain 2;IPR004160,Translation elongation factor EFTu/EF1A, C-terminal;IPR004539,Translation elongation factor EF1A, eukaryotic/archaeal;IPR009000,Translation protein, beta-barrel domain superfamily;IPR031157,Tr-type G domain, conserve…	-	GO:0003746,molecular_function,translation elongation factor activity;GO:0005737,cellular_component,cytoplasm;GO:0005525,molecular_function,GTP binding;GO:0006414,biological_process,translational elongation;GO:0003924,molecular_function,GTPase activity;GO:0000166,molecular_function,nucleotide binding	-
fc866f0a-202c-4090-8844-2d7e0d1f0fcf	NC_040049.1	7181864	7188226	+	6363	30.30884947	41.59394653	36.32606375	7.950619334	7.764275491	7.827966509	3.27E-09	1.36E-06	2.507977937	A0A1V4JTW7,Uncharacterized protein	-	-	IPR000286,Histone deacetylase superfamily	-	-	-
HSD17B2	NC_040057.1;NC_040057.1;NC_040057.1;NC_040057.1;NC_040057.1	7247621;7249697;7251920;7252403;7256883	7248651;7249834;7252105;7252615;7257220	-;-;-;-;-	1906	0.039930235	0.018163171	0.044915227	5.712233811	5.675298208	7.006653221	3.37E-09	1.36E-06	-7.105425015	R0LKH5,Estradiol 17-beta-dehydrogenase 2	XP_005020223.2,estradiol 17-beta-dehydrogenase 2	PF08643,ungal family of unknown function (DUF1776);PF13561,noyl-(Acyl carrier protein) reductase;PF08659,KR domain;PF00106,short chain dehydrogenase	IPR036291,NAD(P)-binding domain superfamily;IPR020904,Short-chain dehydrogenase/reductase, conserved site;IPR002347,Short-chain dehydrogenase/reductase SDR	-	GO:0004303,molecular_function,estradiol 17-beta-dehydrogenase activity;GO:0032526,biological_process,response to retinoic acid;GO:0016491,molecular_function,oxidoreductase activity;GO:0016021,cellular_component,integral component of membrane;GO:0016020,cellular_component,membrane;GO:0055114,biological_process,oxidation-reduction process;GO:0047035,molecular_function,testosterone dehydrogenase (NA…	K13368,ko00140,Steroid hormone biosynthesis;K13368,ko04913,Ovarian steroidogenesis
ISM1	NC_040048.1;NC_040048.1;NC_040048.1;NC_040048.1;NC_040048.1;NC_040048.1;NC_040048.1;NC_040048.1;NC_040048.1;NC_040048.1;NC_040048.1;NC_040048.1;NC_040048.1;NC_040048.1;NC_040048.1;NC_040048.1;NC_040048.1;NC_040048.1;NC_040048.1;NC_040048.1;NC_040048.1;NC_040048.1;NC_040048.1;NC_040048.1;NC_040048.1;NC_040048.1;NC_040048.1;NC_040048.1;NC_040048.1;NC_040048.1;NC_040048.1;NC_040048.1;NC_040048.1	11463966;11464281;11464281;11465738;11467521;11467521;11467521;11467521;11467521;11469807;11469807;11469807;11469807;11469807;11472887;11472887;11472887;11472887;11472887;11481598;11481598;11481598;11481598;11504612;11504612;11504612;11504612;11504612;11505587;11505587;11505587;11505587;11506209	11465880;11465880;11465880;11465905;11467644;11467610;11467610;11467610;11467610;11469950;11469950;11469950;11469950;11469950;11473154;11473154;11473154;11473154;11473154;11481834;11481834;11481834;11481834;11505093;11505776;11505093;11505093;11505093;11506554;11506087;11506374;11506616;11506372	-;-;-;-;-;-;-;-;-;-;-;-;-;-;-;-;-;-;-;-;-;-;-;-;-;-;-;-;-;-;-;-;-	4718	1.806695029	2.164604924	1.868941845	14.20737171	14.63591095	13.59188882	3.26E-09	1.36E-06	-2.548928176	F1NGZ0,Isthmin 1	-	PF00090,Thrombospondin type 1 domain;PF03782,AMOP domain	IPR000884,Thrombospondin type-1 (TSP1) repeat;IPR036383,Thrombospondin type-1 (TSP1) repeat superfamily;IPR005533,AMOP domain	ENOG410IE9A,-;ENOG410XT8R,-	-	-
LOC101794572	NC_040056.1;NC_040056.1;NC_040056.1;NC_040056.1;NC_040056.1;NC_040056.1;NC_040056.1;NC_040056.1;NC_040056.1;NC_040056.1;NC_040056.1;NC_040056.1;NC_040056.1;NC_040056.1;NC_040056.1;NC_040056.1	20767771;20768992;20769317;20769524;20769982;20770308;20770556;20770889;20771169;20771380;20771681;20771897;20772190;20772437;20776760;20776970	20768914;20769135;20769447;20769745;20770206;20770450;20770800;20771074;20771297;20771555;20771825;20772052;20772321;20772660;20776874;20777132	-;-;-;-;-;-;-;-;-;-;-;-;-;-;-;-	3680	0.165450061	0.301034813	0.32568422	18.83262994	15.52599583	13.94926861	2.85E-09	1.36E-06	-5.62523892	E1C6M9,Cadherin-1	NP_001034347.2,cadherin-1 precursor	PF08758,Cadherin prodomain like;PF00028,Cadherin domain;PF01049,Cadherin cytoplasmic region	IPR002126,Cadherin;IPR014868,Cadherin prodomain;IPR027397,Catenin binding domain superfamily;IPR000233,Cadherin, cytoplasmic domain;IPR015919,Cadherin-like;IPR020894,Cadherin conserved site	-	GO:0098609,biological_process,cell-cell adhesion;GO:0030506,molecular_function,ankyrin binding;GO:0005509,molecular_function,calcium ion binding;GO:0005802,cellular_component,trans-Golgi network;GO:0005886,cellular_component,plasma membrane;GO:0071681,biological_process,cellular response to indole-3-methanol;GO:0008013,molecular_function,beta-catenin binding;GO:0050839,molecular_function,cell adh…	K05689,ko04520,Adherens junction;K05689,ko05219,Bladder cancer;K05689,ko05218,Melanoma;K05689,ko05200,Pathways in cancer;K05689,ko04015,Rap1 signaling pathway;K05689,ko05100,Bacterial invasion of epithelial cells;K05689,ko04514,Cell adhesion molecules (CAMs);K05689,ko05130,Pathogenic Escherichia coli infection;K05689,ko04390,Hippo signaling pathway;K05689,ko05213,Endometrial cancer;K05689,ko05216…
PTCH2	NC_040053.1;NC_040053.1;NC_040053.1;NC_040053.1;NC_040053.1;NC_040053.1;NC_040053.1;NC_040053.1;NC_040053.1;NC_040053.1;NC_040053.1;NC_040053.1;NC_040053.1;NC_040053.1;NC_040053.1;NC_040053.1;NC_040053.1;NC_040053.1;NC_040053.1;NC_040053.1;NC_040053.1;NC_040053.1	14561163;14570462;14571787;14572070;14574677;14574957;14575368;14575712;14575930;14576181;14576355;14576570;14576796;14577284;14577735;14577973;14580023;14580557;14580822;14581230;14581654;14582190	14561425;14570651;14571856;14572161;14574872;14575078;14575515;14575843;14576088;14576273;14576480;14576688;14577201;14577596;14577877;14578153;14580306;14580694;14580964;14581521;14582058;14582341	+;+;+;+;+;+;+;+;+;+;+;+;+;+;+;+;+;+;+;+;+;+	4167	0.730569024	0.631400112	0.790958557	15.52986712	13.61783995	12.5018688	2.83E-09	1.36E-06	-3.963989363	A0A226NLU9,Uncharacterized protein	-	-	IPR000731,Sterol-sensing domain;IPR004766,Transmembrane receptor, patched;IPR003392,Protein patched/dispatched	-	GO:0008158,molecular_function,hedgehog receptor activity;GO:0016021,cellular_component,integral component of membrane;GO:0007165,biological_process,signal transduction;GO:0016020,cellular_component,membrane	-
LOC110351921	NC_040048.1;NC_040048.1;NC_040048.1;NC_040048.1;NC_040048.1;NC_040048.1;NC_040048.1;NC_040048.1;NC_040048.1;NC_040048.1;NC_040048.1;NC_040048.1;NC_040048.1;NC_040048.1;NC_040048.1;NC_040048.1;NC_040048.1;NC_040048.1;NC_040048.1;NC_040048.1;NC_040048.1;NC_040048.1;NC_040048.1;NC_040048.1;NC_040048.1;NC_040048.1;NC_040048.1;NC_040048.1;NC_040048.1;NC_040048.1;NC_040048.1;NC_040048.1;NC_040048.1;NC_…	38637233;38637233;38656487;38656487;38657767;38657767;38736251;38736251;38736252;38736988;38736989;38736989;38739387;38739387;38739387;38739387;38739387;38739454;38740339;38742241;38742241;38742241;38742241;38742241;38742241;38742241;38742241;38742241;38742241;38743098;38743098;38743098;38743098;38743098;38743098;38743098;38743098;38743098;38743098;38757647;38757647;38757647;38757647;38757647;387…	38637633;38637633;38656630;38656552;38657847;38657847;38739242;38738640;38739242;38739242;38739242;38739242;38739443;38739443;38739443;38739443;38739443;38740318;38741571;38742412;38742412;38742412;38742412;38742412;38742412;38742412;38742412;38742412;38742412;38756129;38756129;38756129;38756129;38756129;38756129;38756129;38756129;38756129;38756129;38757685;38757685;38757685;38757685;38757685;387…	+;+;+;+;+;+;+;+;+;+;+;+;+;+;+;+;+;+;+;+;+;+;+;+;+;+;+;+;+;+;+;+;+;+;+;+;+;+;+;+;+;+;+;+;+;+;+;+;+;+;+;+;+;+;+;+;+;+;+;+;+;+;+;+;+;+;+;+;+;+;+;+;+;+;+;+;+;+;+;+;+;+;+;+;+;+;+;+;+;+;+;+;+;+;+;+;+;+	34721	0.770473787	0.874423723	0.909809864	0.127191671	0.130746324	0.155930413	3.55E-09	1.39E-06	2.93875824	R0K362,Uncharacterized protein	-	-	-	-	-	-
OLFML2A	NC_040063.1;NC_040063.1;NC_040063.1;NC_040063.1;NC_040063.1;NC_040063.1;NC_040063.1;NC_040063.1;NC_040063.1;NC_040063.1;NC_040063.1;NC_040063.1;NC_040063.1;NC_040063.1;NC_040063.1;NC_040063.1	10597196;10599221;10603454;10603454;10603899;10603899;10604161;10604161;10604424;10604424;10604763;10604763;10605123;10605123;10605506;10605506	10597332;10599375;10603717;10603717;10604006;10604006;10604346;10604346;10604682;10604682;10604984;10604984;10605308;10605308;10606789;10606789	+;+;+;+;+;+;+;+;+;+;+;+;+;+;+;+	2801	251.4439265	267.5217175	274.1700691	38.15202706	44.46856774	34.00476606	3.67E-09	1.40E-06	3.075794456	F1P0X8,Olfactomedin like 2A	XP_015135337.1,olfactomedin-like protein 2A isoform X2	PF02191,Olfactomedin-like domain	IPR031231,Olfactomedin-like protein 2A;IPR003112,Olfactomedin-like domain	KOG3545,Olfactomedin and related extracellular matrix glycoproteins;ENOG410ZJ72,-	GO:0030198,biological_process,extracellular matrix organization;GO:0042803,molecular_function,protein homodimerization activity;GO:0005578,,;GO:0050840,molecular_function,extracellular matrix binding	-
TFAP2C	NC_040066.1;NC_040066.1;NC_040066.1;NC_040066.1;NC_040066.1;NC_040066.1	9682368;9682943;9684204;9685150;9686614;9688636	9682712;9682994;9684426;9685268;9686755;9690285	+;+;+;+;+;+	2531	0.045104916	0.09574596	0.101471857	9.069778543	7.30057928	7.25709184	3.90E-09	1.46E-06	-6.275590628	A0A218UZ88,Transcription factor AP-2 gamma	-	-	IPR004979,Transcription factor AP-2;IPR013854,Transcription factor AP-2, C-terminal	-	GO:0006355,biological_process,regulation of transcription, DNA-templated;GO:0003700,molecular_function,DNA binding transcription factor activity;GO:0005634,cellular_component,nucleus	-
CCN3	NC_040047.1;NC_040047.1;NC_040047.1;NC_040047.1;NC_040047.1	142753327;142753689;142754101;142756162;142757670	142753602;142753917;142754352;142756370;142758859	+;+;+;+;+	2156	0.194150582	0.353255138	0.258095897	17.64412073	12.69931475	14.30430855	4.12E-09	1.50E-06	-5.464807024	A0A1D5P2P1,Protein NOV	-	-	IPR012395,IGFBP-related, CNN;IPR000867,Insulin-like growth factor-binding protein, IGFBP;IPR000884,Thrombospondin type-1 (TSP1) repeat;IPR017891,Insulin-like growth factor binding protein, N-terminal, Cys-rich conserved site;IPR009030,Growth factor receptor cysteine-rich domain superfamily;IPR006207,Cystine knot, C-terminal;IPR001007,VWFC domain;IPR006208,Glycoprotein hormone subunit beta;IPR0363…	-	GO:0001558,biological_process,regulation of cell growth;GO:0005520,molecular_function,insulin-like growth factor binding;GO:0005576,cellular_component,extracellular region	-
LOC101797203	NC_040073.1;NC_040073.1;NC_040073.1;NC_040073.1;NC_040073.1;NC_040073.1;NC_040073.1;NC_040073.1;NC_040073.1	5490054;5491874;5492426;5493813;5494082;5494706;5495215;5497842;5498822	5491334;5491908;5492646;5493938;5494246;5494801;5495275;5498050;5500330	-;-;-;-;-;-;-;-;-	3703	4.603827787	5.525204177	5.710310726	99.21069452	92.06975206	70.81853064	4.58E-09	1.63E-06	-3.744266672	U3I0A3,Keratin 7	-	PF00038,Intermediate filament protein;PF16208,Keratin type II head	IPR018039,Intermediate filament protein, conserved site;IPR001664,Intermediate filament protein;IPR032444,Keratin type II head;IPR003054,Keratin, type II	-	GO:0005737,cellular_component,cytoplasm;GO:0045095,cellular_component,keratin filament;GO:0005882,cellular_component,intermediate filament;GO:0005198,molecular_function,structural molecule activity	-
GAP43	NC_040046.1;NC_040046.1;NC_040046.1	117295375;117326033;117347638	117295480;117326660;117353512	+;+;+	6609	0.080609653	0.094286891	0.110103132	7.039396061	7.684560064	12.68842063	4.73E-09	1.64E-06	-6.262681175	U3JU27,Growth associated protein 43	XP_005038645.1,neuromodulin	PF10580,ap junction protein N-terminal region;PF06614,Neuromodulin;PF00612,IQ calmodulin-binding motif	IPR017454,Neuromodulin (GAP-43), C-terminal;IPR018947,Neuromodulin gap junction N-terminal;IPR018243,Neuromodulin, palmitoylation site;IPR001422,Neuromodulin (GAP-43);IPR033137,Neuromodulin, phosphorylation site;IPR000048,IQ motif, EF-hand binding site	-	GO:0040008,biological_process,regulation of growth;GO:0045165,biological_process,cell fate commitment;GO:0005737,cellular_component,cytoplasm;GO:0007411,biological_process,axon guidance;GO:0016198,biological_process,axon choice point recognition;GO:0071944,cellular_component,cell periphery;GO:0010001,biological_process,glial cell differentiation;GO:0005886,cellular_component,plasma membrane;GO:00…	-
ATP8A2	NC_040046.1;NC_040046.1;NC_040046.1;NC_040046.1;NC_040046.1;NC_040046.1;NC_040046.1;NC_040046.1;NC_040046.1;NC_040046.1;NC_040046.1;NC_040046.1;NC_040046.1;NC_040046.1;NC_040046.1;NC_040046.1;NC_040046.1;NC_040046.1;NC_040046.1;NC_040046.1;NC_040046.1;NC_040046.1;NC_040046.1;NC_040046.1;NC_040046.1;NC_040046.1;NC_040046.1;NC_040046.1;NC_040046.1;NC_040046.1;NC_040046.1;NC_040046.1;NC_040046.1;NC_…	19721025;19721025;19729799;19729799;19744580;19744580;19750755;19750755;19815048;19815048;19819445;19819445;19819842;19819842;19823086;19823086;19824243;19824243;19827063;19827063;19861923;19861923;19866054;19866054;19918113;19918113;19953662;19953662;19958321;19958321;19960783;19960783;19962127;19962127;19964073;19964073;19965916;19965916;19967143;19967143;19968585;19968585;19975464;19975464;199…	19722850;19722850;19729890;19729890;19744684;19744684;19750843;19750843;19815155;19815155;19819501;19819501;19819903;19819903;19823164;19823164;19824365;19824365;19827137;19827137;19862033;19862033;19866237;19866237;19918285;19918285;19953726;19953726;19958459;19958459;19960922;19960922;19962211;19962211;19964142;19964142;19965965;19965965;19967225;19967225;19968690;19968690;19975539;19975539;199…	-;-;-;-;-;-;-;-;-;-;-;-;-;-;-;-;-;-;-;-;-;-;-;-;-;-;-;-;-;-;-;-;-;-;-;-;-;-;-;-;-;-;-;-;-;-;-;-;-;-;-;-;-;-;-;-;-;-;-;-;-;-;-;-;-;-;-;-	5396	18.77993104	18.13070865	13.95341151	1.725985676	1.682595673	2.081015796	5.44E-09	1.65E-06	3.533991412	F1P2K5,Phospholipid-transporting ATPase	XP_417130.4,phospholipid-transporting ATPase IB isoform X2	PF13246,Cation transport ATPase (P-type);PF16209,Phospholipid-translocating ATPase N-terminal;PF00122,1-E2 ATPase;PF16212,Phospholipid-translocating P-type ATPase C-terminal	IPR032630,P-type ATPase, C-terminal;IPR023214,HAD superfamily;IPR036412,HAD-like superfamily;IPR023299,P-type ATPase, cytoplasmic domain N;IPR018303,P-type ATPase, phosphorylation site;IPR006539,P-type ATPase, subfamily IV;IPR023298,P-type ATPase, transmembrane domain superfamily;IPR032631,P-type ATPase, N-terminal;IPR008250,P-type ATPase, A domain superfamily;IPR001757,P-type ATPase	ENOG410ITKD,-;ENOG410XPYK,-	GO:0050908,biological_process,detection of light stimulus involved in visual perception;GO:0007409,biological_process,axonogenesis;GO:0042755,biological_process,eating behavior;GO:0045332,biological_process,phospholipid translocation;GO:0010996,biological_process,response to auditory stimulus;GO:0010976,biological_process,positive regulation of neuron projection development;GO:0004012,molecular_f…	-
DTNA	NC_040047.1;NC_040047.1;NC_040047.1;NC_040047.1;NC_040047.1;NC_040047.1;NC_040047.1;NC_040047.1;NC_040047.1;NC_040047.1;NC_040047.1;NC_040047.1;NC_040047.1;NC_040047.1;NC_040047.1;NC_040047.1;NC_040047.1;NC_040047.1;NC_040047.1;NC_040047.1;NC_040047.1;NC_040047.1;NC_040047.1;NC_040047.1;NC_040047.1;NC_040047.1;NC_040047.1;NC_040047.1;NC_040047.1;NC_040047.1;NC_040047.1;NC_040047.1;NC_040047.1;NC_…	111135392;111135392;111135392;111135392;111135392;111135392;111135392;111135392;111135392;111135392;111135392;111135392;111135392;111135392;111135392;111135392;111135392;111135392;111135392;111135392;111135392;111135392;111135392;111135392;111135392;111135392;111135392;111135392;111135392;111135392;111135392;111135429;111135429;111135429;111135429;111135429;111135429;111138766;111143412;111146592…	111138904;111138904;111138904;111138904;111138904;111138904;111138904;111138904;111138904;111138904;111138904;111138904;111138904;111138904;111138904;111138904;111138904;111138904;111138904;111138904;111138904;111138904;111138904;111138904;111138904;111138904;111138904;111138904;111138904;111138904;111138904;111138904;111138904;111138904;111138904;111138904;111138904;111138904;111143458;111146724…	-;-;-;-;-;-;-;-;-;-;-;-;-;-;-;-;-;-;-;-;-;-;-;-;-;-;-;-;-;-;-;-;-;-;-;-;-;-;-;-;-;-;-;-;-;-;-;-;-;-;-;-;-;-;-;-;-;-;-;-;-;-;-;-;-;-;-;-;-;-;-;-;-;-;-;-;-;-;-;-;-;-;-;-;-;-;-;-;-;-;-;-;-;-;-;-;-;-;-;-;-;-;-;-;-;-;-;-;-;-;-;-;-;-;-;-;-;-;-;-;-;-;-;-;-;-;-;-;-;-;-;-;-;-;-;-;-;-;-;-;-;-;-;-;-;-;-;-;-;-;-;-;-;-;-;-;-;-;-;-;-;-;-;-;-;-;-;-;-;-;-;-;-;-;-;-;-;-;-;-;-;-;-;-;-;-;-;-;-;-;-;-;-;-;-;-;-;-;-;-…	9762	21.52935444	26.0050351	22.669307	5.133048161	6.139876627	5.324213773	5.51E-09	1.65E-06	2.390780382	A0A1D5PAS6,Dystrobrevin alpha	-	-	IPR011992,EF-hand domain pair;IPR000433,Zinc finger, ZZ-type;IPR015154,EF-hand domain, type 2;IPR015153,EF-hand domain, type 1;IPR017432,Distrobrevin	-	GO:0046872,molecular_function,metal ion binding;GO:0008270,molecular_function,zinc ion binding	-
GLIS1	NC_040053.1;NC_040053.1;NC_040053.1;NC_040053.1;NC_040053.1;NC_040053.1;NC_040053.1;NC_040053.1;NC_040053.1;NC_040053.1;NC_040053.1;NC_040053.1;NC_040053.1;NC_040053.1;NC_040053.1;NC_040053.1;NC_040053.1;NC_040053.1;NC_040053.1;NC_040053.1;NC_040053.1;NC_040053.1;NC_040053.1;NC_040053.1;NC_040053.1;NC_040053.1;NC_040053.1;NC_040053.1;NC_040053.1;NC_040053.1;NC_040053.1;NC_040053.1;NC_040053.1;NC_…	9768708;9769233;9769233;9769392;9804123;9852574;9852574;9852574;9852574;9858976;9858976;9858976;9858976;9921728;9921728;9921728;9921728;9925281;9925281;9925281;9925281;9928581;9928581;9928581;9928581;9934481;9934481;9934481;9934481;9949182;9949182;9949182;9949182;9957029;9957029;9957029;9957029;9960261;9960261;9960261;9960261	9768934;9769599;9769599;9769599;9804221;9852772;9852772;9852772;9852772;9860077;9860077;9860077;9860077;9921889;9921889;9921889;9921889;9925379;9925391;9925391;9925391;9928713;9928713;9928713;9928713;9934631;9934631;9934631;9934631;9949366;9949366;9949366;9949366;9957196;9957196;9957196;9957196;9960912;9960910;9960912;9960911	+;+;+;+;+;+;+;+;+;+;+;+;+;+;+;+;+;+;+;+;+;+;+;+;+;+;+;+;+;+;+;+;+;+;+;+;+;+;+;+;+	3556	0.021402426	0.019470756	0.03611154	3.012547177	4.258708025	3.529976967	5.53E-09	1.65E-06	-6.783208406	A0A1V4JY46,Zinc finger protein GLIS1 isoform A	-	-	IPR013087,Zinc finger C2H2-type;IPR036236,Zinc finger C2H2 superfamily;IPR030430,Zinc finger protein GLIS1	-	GO:0006357,biological_process,regulation of transcription by RNA polymerase II;GO:0000977,molecular_function,RNA polymerase II regulatory region sequence-specific DNA binding;GO:0005634,cellular_component,nucleus;GO:0003676,molecular_function,nucleic acid binding	-
LOC101796027	NC_040048.1;NC_040048.1;NC_040048.1;NC_040048.1;NC_040048.1;NC_040048.1;NC_040048.1;NC_040048.1;NC_040048.1;NC_040048.1;NC_040048.1;NC_040048.1;NC_040048.1;NC_040048.1;NC_040048.1;NC_040048.1;NC_040048.1;NC_040048.1;NC_040048.1;NC_040048.1;NC_040048.1;NC_040048.1;NC_040048.1;NC_040048.1;NC_040048.1	64268222;64289987;64293186;64306022;64306158;64307455;64314247;64317694;64320452;64321010;64325555;64327258;64327879;64338991;64351393;64352468;64357452;64359102;64361543;64362484;64366547;64367632;64367883;64368800;64385371	64268243;64290022;64293239;64306054;64306190;64307481;64314294;64317717;64320502;64321060;64325605;64327308;64327917;64339020;64351419;64352515;64357496;64359119;64361590;64362504;64366573;64367667;64367927;64368847;64387973	+;+;+;+;+;+;+;+;+;+;+;+;+;+;+;+;+;+;+;+;+;+;+;+;+	3516	33.86502999	26.84055846	30.03355815	3.86759551	3.772545437	3.444667939	5.03E-09	1.65E-06	3.352266767	A0A1V4JLS0,Uncharacterized protein	-	-	-	-	-	-
LOC101799146	NC_040073.1;NC_040073.1;NC_040073.1;NC_040073.1;NC_040073.1;NC_040073.1;NC_040073.1;NC_040073.1;NC_040073.1	5439567;5440736;5442689;5443287;5443677;5444045;5444602;5445171;5445333	5440151;5440950;5442749;5443382;5443841;5444170;5444822;5445205;5446316	+;+;+;+;+;+;+;+;+	2488	0.550613547	1.307952705	0.946234585	102.4057086	78.97163545	76.1462989	5.52E-09	1.65E-06	-6.208704971	U3IB68,Uncharacterized protein	-	PF00038,Intermediate filament protein;PF16208,Keratin type II head	IPR018039,Intermediate filament protein, conserved site;IPR001664,Intermediate filament protein;IPR032444,Keratin type II head;IPR003054,Keratin, type II	-	GO:0045095,cellular_component,keratin filament;GO:0005882,cellular_component,intermediate filament;GO:0005198,molecular_function,structural molecule activity	-
LOC113842033	NW_020866758.1;NW_020866758.1;NW_020866758.1;NW_020866758.1;NW_020866758.1;NW_020866758.1	11750;12238;12262;13625;13712;13913	12130;12259;12281;13709;13752;14557	+;+;+;+;+;+	1194	0.509929836	0.550888665	0.609440201	16.5158808	12.77249885	16.49173895	5.38E-09	1.65E-06	-4.457179442	R0JVB5,Cytokine-like protein 1	-	PF15153,Cytokine-like protein 1	IPR029253,Cytokine-like protein 1	-	-	-
MEIS2	NC_040050.1;NC_040050.1;NC_040050.1;NC_040050.1;NC_040050.1;NC_040050.1;NC_040050.1;NC_040050.1;NC_040050.1;NC_040050.1;NC_040050.1;NC_040050.1;NC_040050.1;NC_040050.1;NC_040050.1;NC_040050.1;NC_040050.1;NC_040050.1;NC_040050.1;NC_040050.1;NC_040050.1;NC_040050.1;NC_040050.1;NC_040050.1;NC_040050.1;NC_040050.1;NC_040050.1;NC_040050.1;NC_040050.1;NC_040050.1;NC_040050.1;NC_040050.1;NC_040050.1;NC_…	44627255;44627255;44627255;44627255;44627255;44627255;44627255;44627255;44627255;44627255;44627255;44627255;44627255;44627255;44627255;44628804;44628804;44628804;44629153;44629153;44629153;44629153;44629153;44629153;44629153;44629153;44629153;44629153;44629153;44629153;44629153;44629153;44629153;44630728;44630728;44630728;44630728;44630728;44630728;44630728;44630728;44630728;44630728;44630728;446…	44628346;44628346;44628346;44628346;44628346;44628346;44628346;44628346;44628346;44628346;44628346;44628346;44628346;44628346;44628346;44628836;44628836;44628836;44629385;44629385;44629385;44629385;44629385;44629385;44629385;44629385;44629385;44629385;44629385;44629385;44629385;44629385;44629385;44630869;44630869;44630869;44630869;44630869;44630869;44630869;44630869;44630869;44630869;44630869;446…	+;+;+;+;+;+;+;+;+;+;+;+;+;+;+;+;+;+;+;+;+;+;+;+;+;+;+;+;+;+;+;+;+;+;+;+;+;+;+;+;+;+;+;+;+;+;+;+;+;+;+;+;+;+;+;+;+;+;+;+;+;+;+;+;+;+;+;+;+;+;+;+;+;+;+;+;+;+;+;+;+;+;+;+;+;+;+;+;+;+;+;+;+;+;+;+;+;+;+;+;+;+;+;+;+;+;+;+;+;+;+;+;+;+;+;+;+;+;+;+;+;+;+;+;+;+;+;+;+;+;+;+;+;+;+;+;+;+;+;+;+;+;+;+;+;+;+;+;+;+;+;+;+;+;+;+;+;+;+;+;+;+;+;+;+;+;+;+;+;+;+;+;+;+;+;+;+;+;+;+;+;+;+;+;+;+;+;+;+;+;+;+;+;+;+	23510	0.775314046	0.924744117	0.861182143	3.855459964	4.177169228	4.162233914	5.17E-09	1.65E-06	-1.939051195	F7EAH2,Homeobox protein Meis2 isoform c	XP_002753608.1,homeobox protein Meis2 isoform X1	PF16493,N-terminal of Homeobox Meis and PKNOX1;PF05920,Homeobox KN domain	IPR008422,Homeobox KN domain;IPR001356,Homeobox domain;IPR009057,Homeobox-like domain superfamily;IPR032453,Homeobox protein PKNOX/Meis, N-terminal	KOG0773,Transcription factor MEIS1 and related HOX domain proteins;ENOG410XPMQ,-	GO:0006366,biological_process,transcription by RNA polymerase II;GO:0045638,biological_process,negative regulation of myeloid cell differentiation;GO:0008542,biological_process,visual learning;GO:0003712,molecular_function,transcription cofactor activity;GO:0001654,biological_process,eye development;GO:0043565,molecular_function,sequence-specific DNA binding;GO:0045944,biological_process,positive…	-
LOC113839978	NC_040073.1;NC_040073.1;NC_040073.1;NC_040073.1;NC_040073.1;NC_040073.1;NC_040073.1;NC_040073.1;NC_040073.1	5360249;5360576;5360725;5361261;5362553;5362813;5362990;5363455;5364430	5360484;5360631;5360945;5361386;5362717;5362908;5363050;5363663;5364822	-;-;-;-;-;-;-;-;-	1563	1.217322906	1.971267634	1.122823214	55.9780332	41.61521059	47.98128943	6.08E-09	1.78E-06	-4.75363971	A0A226PU49,Uncharacterized protein	-	-	IPR018039,Intermediate filament protein, conserved site;IPR001664,Intermediate filament protein;IPR032444,Keratin type II head;IPR003054,Keratin, type II	-	GO:0005882,cellular_component,intermediate filament;GO:0045095,cellular_component,keratin filament;GO:0005198,molecular_function,structural molecule activity	-
AMPD1	NC_040072.1;NC_040072.1;NC_040072.1;NC_040072.1;NC_040072.1;NC_040072.1;NC_040072.1;NC_040072.1;NC_040072.1;NC_040072.1;NC_040072.1;NC_040072.1;NC_040072.1;NC_040072.1;NC_040072.1;NC_040072.1;NC_040072.1;NC_040072.1;NC_040072.1;NC_040072.1;NC_040072.1;NC_040072.1;NC_040072.1;NC_040072.1;NC_040072.1;NC_040072.1;NC_040072.1;NC_040072.1;NC_040072.1;NC_040072.1;NC_040072.1;NC_040072.1;NC_040072.1;NC_…	213604;215094;215094;215302;215302;215302;216960;216960;216960;217637;217637;217637;218926;218926;218926;219319;219319;219319;220051;220051;220051;220432;220432;220432;220861;220861;220861;221090;221090;221090;221382;221382;221382;221970;221970;221970;222479;222479;222479;223043;223043;223043;223377;223377;223377;223605;223605;223605;227329	213751;215163;215163;215313;215313;215313;217134;217134;217134;217802;217802;217802;219088;219088;219088;219538;219538;219538;220180;220180;220180;220626;220626;220626;220992;220992;220992;221253;221253;221253;221508;221508;221508;222133;222133;222133;222599;222599;222599;223216;223216;223216;223487;223487;223487;223756;223893;223893;227467	+;+;+;+;+;+;+;+;+;+;+;+;+;+;+;+;+;+;+;+;+;+;+;+;+;+;+;+;+;+;+;+;+;+;+;+;+;+;+;+;+;+;+;+;+;+;+;+;+	2700	156.6113511	132.2317715	146.5964986	30.25120179	27.729128	31.29608825	7.30E-09	1.92E-06	2.606556808	A0A091UVF1,AMP deaminase 1	-	PF00962,Adenosine/AMP deaminase	IPR006329,AMP deaminase;IPR006650,Adenosine/AMP deaminase active site;IPR032466,Metal-dependent hydrolase;IPR001365,Adenosine/AMP deaminase domain;IPR029770,AMP deaminase 1	-	GO:0009168,biological_process,purine ribonucleoside monophosphate biosynthetic process;GO:0019239,molecular_function,deaminase activity;GO:0003876,molecular_function,AMP deaminase activity;GO:0032264,biological_process,IMP salvage	-
bc429317-7108-48c5-8687-8d3f532eb94a	NC_040066.1	1727015	1729566	-	2552	95.4170989	112.2675834	106.255753	37.50547035	36.42487703	40.29272476	7.15E-09	1.92E-06	1.771143728	-	-	-	-	-	-	-
FXYD6	NC_040070.1;NC_040070.1;NC_040070.1;NC_040070.1;NC_040070.1;NC_040070.1;NC_040070.1;NC_040070.1;NC_040070.1;NC_040070.1;NC_040070.1;NC_040070.1;NC_040070.1;NC_040070.1;NC_040070.1;NC_040070.1;NC_040070.1;NC_040070.1;NC_040070.1;NC_040070.1;NC_040070.1;NC_040070.1;NC_040070.1;NC_040070.1;NC_040070.1;NC_040070.1;NC_040070.1;NC_040070.1;NC_040070.1;NC_040070.1;NC_040070.1;NC_040070.1;NC_040070.1;NC_…	6678315;6678315;6678315;6678315;6678315;6678315;6678315;6678315;6678315;6680067;6680067;6680067;6680067;6680067;6680067;6680067;6680067;6680067;6680221;6680221;6680221;6680221;6680221;6680221;6680221;6680221;6680221;6680433;6680433;6680433;6680433;6680433;6680433;6680433;6680433;6680433;6680574;6680574;6680574;6680574;6680574;6680574;6680574;6680574;6680574;6680759;6680759;6680759;6680759;6680759…	6679643;6679643;6679643;6679643;6679643;6679643;6679643;6679643;6679643;6680109;6680109;6680109;6680109;6680109;6680109;6680109;6680109;6680109;6680270;6680270;6680270;6680270;6680270;6680270;6680270;6680270;6680270;6680469;6680469;6680469;6680469;6680469;6680469;6680469;6680469;6680469;6680648;6680648;6680648;6680648;6680648;6680648;6680648;6680648;6680648;6680797;6680797;6680797;6680797;6680797…	-;-;-;-;-;-;-;-;-;-;-;-;-;-;-;-;-;-;-;-;-;-;-;-;-;-;-;-;-;-;-;-;-;-;-;-;-;-;-;-;-;-;-;-;-;-;-;-;-;-;-;-;-;-;-;-;-;-;-;-;-;-;-;-;-;-;-;-;-;-;-;-;-;-	2536	67.94412918	71.10819765	77.11847146	23.03492135	22.87946124	21.79160683	7.33E-09	1.92E-06	1.986843654	A0A226PPB9,FXYD domain-containing ion transport regulator	-	-	IPR000272,Ion-transport regulator, FXYD motif	-	GO:0005216,molecular_function,ion channel activity;GO:0034220,biological_process,ion transmembrane transport;GO:0006811,biological_process,ion transport;GO:0016021,cellular_component,integral component of membrane;GO:0016020,cellular_component,membrane	-
LOC101792676	NC_040073.1;NC_040073.1;NC_040073.1;NC_040073.1;NC_040073.1;NC_040073.1;NC_040073.1;NC_040073.1	3338594;3340002;3340832;3341113;3341407;3341658;3342393;3342951	3339265;3340084;3340988;3341274;3341532;3341878;3342418;3343329	+;+;+;+;+;+;+;+	1826	0.479315894	1.042741069	0.867336164	43.22210935	32.10582423	34.5255857	6.84E-09	1.92E-06	-5.210809862	R0KKS9,Keratin, type I cytoskeletal 15	-	PF00038,Intermediate filament protein	IPR018039,Intermediate filament protein, conserved site;IPR001664,Intermediate filament protein;IPR002957,Keratin, type I	-	GO:0005882,cellular_component,intermediate filament;GO:0005198,molecular_function,structural molecule activity	-
PTH1R	NC_040047.1;NC_040047.1;NC_040047.1;NC_040047.1;NC_040047.1;NC_040047.1;NC_040047.1;NC_040047.1;NC_040047.1;NC_040047.1;NC_040047.1;NC_040047.1;NC_040047.1;NC_040047.1;NC_040047.1;NC_040047.1;NC_040047.1;NC_040047.1;NC_040047.1;NC_040047.1;NC_040047.1;NC_040047.1;NC_040047.1;NC_040047.1;NC_040047.1;NC_040047.1	1003215;1003215;1014158;1014158;1015442;1015442;1017574;1017574;1020955;1020955;1022882;1022882;1029539;1029539;1031696;1031696;1034716;1034716;1046574;1046574;1048995;1048995;1065093;1065093;1070302;1123009	1013421;1013421;1014199;1014199;1015583;1015583;1017668;1017668;1021021;1021021;1022942;1022942;1029692;1029692;1031882;1031882;1034810;1034810;1046692;1046692;1049105;1049105;1065198;1065198;1087753;1123160	-;-;-;-;-;-;-;-;-;-;-;-;-;-;-;-;-;-;-;-;-;-;-;-;-;-	28990	0.330785979	0.316455189	0.342551816	1.894396788	2.027150703	2.02941649	7.09E-09	1.92E-06	-2.272155452	C7S302,Parathyroid hormone 1 receptor	NP_001171046.1,parathyroid hormone/parathyroid hormone-related peptide receptor precursor	PF00002,7 transmembrane receptor (Secretin family);PF02793,Hormone receptor domain	IPR001879,GPCR, family 2, extracellular hormone receptor domain;IPR036445,GPCR family 2, extracellular hormone receptor domain superfamily;IPR000832,GPCR, family 2, secretin-like;IPR017981,GPCR, family 2-like;IPR002170,GPCR, family 2, parathyroid hormone receptor;IPR017983,GPCR, family 2, secretin-like, conserved site	ENOG410XRS2,-;KOG4564,Adenylate cyclase-coupled calcitonin receptor	GO:0007189,biological_process,adenylate cyclase-activating G-protein coupled receptor signaling pathway;GO:0030282,biological_process,bone mineralization;GO:0007186,biological_process,G-protein coupled receptor signaling pathway;GO:0007200,biological_process,phospholipase C-activating G-protein coupled receptor signaling pathway;GO:0001501,biological_process,skeletal system development;GO:0007188…	K04585,ko04961,Endocrine and other factor-regulated calcium reabsorption;K04585,ko04080,Neuroactive ligand-receptor interaction
SFN	NC_040069.1	2882105	2883580	+	1476	0.850789948	1.21963969	1.566007748	92.98962214	64.37216258	62.68310822	6.99E-09	1.92E-06	-5.621981596	A0A226NUK6,Uncharacterized protein	-	-	IPR023410,14-3-3 domain;IPR000308,14-3-3 protein;IPR036815,14-3-3 domain superfamily;IPR023409,14-3-3 protein, conserved site	-	GO:0019904,molecular_function,protein domain specific binding	-
CNR1	NC_040048.1	80307142	80314367	-	7226	19.92200991	26.81463639	24.03812502	6.680371905	6.336362695	6.698824487	7.60E-09	1.95E-06	2.152078594	R0KUR4,Cannabinoid receptor 1	XP_005025621.1,-	PF00001,7 transmembrane receptor (rhodopsin family)	IPR000810,Cannabinoid receptor type 1;IPR002230,Cannabinoid receptor family;IPR000276,G protein-coupled receptor, rhodopsin-like;IPR017452,GPCR, rhodopsin-like, 7TM	-	GO:0007165,biological_process,signal transduction;GO:0016020,cellular_component,membrane;GO:0004871,molecular_function,signal transducer activity;GO:0004949,molecular_function,cannabinoid receptor activity;GO:0005886,cellular_component,plasma membrane;GO:0038171,biological_process,cannabinoid signaling pathway;GO:0007186,biological_process,G-protein coupled receptor signaling pathway;GO:0004930,m…	K04277,ko04015,Rap1 signaling pathway;K04277,ko04723,Retrograde endocannabinoid signaling;K04277,ko04080,Neuroactive ligand-receptor interaction
APCDD1	NC_040047.1;NC_040047.1;NC_040047.1;NC_040047.1;NC_040047.1;NC_040047.1	107069182;107073331;107085098;107085429;107087929;107096695	107069650;107073652;107085427;107085630;107088112;107096914	-;-;-;-;-;-	1727	3.415341446	3.928966234	4.238286169	39.01573797	35.89722144	31.79072241	8.07E-09	2.04E-06	-2.896211038	U3IG29,APC down-regulated 1	-	PF14921,Adenomatosis polyposis coli down-regulated 1	IPR029405,APCDD1 domain	-	GO:0030178,biological_process,negative regulation of Wnt signaling pathway;GO:0017147,molecular_function,Wnt-protein binding;GO:0042802,molecular_function,identical protein binding;GO:0005887,cellular_component,integral component of plasma membrane	-
PDK4	NC_040047.1;NC_040047.1;NC_040047.1;NC_040047.1;NC_040047.1;NC_040047.1;NC_040047.1;NC_040047.1;NC_040047.1;NC_040047.1;NC_040047.1	25557903;25561295;25562030;25562444;25563243;25563930;25564508;25565072;25565810;25566939;25567604	25560421;25561408;25562140;25562542;25563319;25564007;25564597;25565256;25565881;25567080;25567859	-;-;-;-;-;-;-;-;-;-;-	3743	28.13093064	31.03039186	32.32901595	5.280172762	3.629031102	4.371491339	8.43E-09	2.10E-06	3.097214488	F1NYN2,Pyruvate dehydrogenase kinase 4	NP_001186838.1,pyruvate dehydrogenase kinase, isozyme 4	PF10436,Mitochondrial branched-chain alpha-ketoacid dehydrogenase kinase;PF02518,Histidine kinase-, DNA gyrase B-, and HSP90-like ATPase	IPR003594,Histidine kinase/HSP90-like ATPase;IPR018955,Branched-chain alpha-ketoacid dehydrogenase kinase/Pyruvate dehydrogenase kinase, N-terminal;IPR036784,Alpha-ketoacid/pyruvate dehydrogenase kinase, N-terminal domain superfamily;IPR005467,Histidine kinase domain;IPR036890,Histidine kinase/HSP90-like ATPase superfamily	COG0642,Signal transduction histidine kinase;KOG0787,Dehydrogenase kinase	GO:0045124,biological_process,regulation of bone resorption;GO:0042593,biological_process,glucose homeostasis;GO:0010565,biological_process,regulation of cellular ketone metabolic process;GO:0010510,biological_process,regulation of acetyl-CoA biosynthetic process from pyruvate;GO:0008286,biological_process,insulin receptor signaling pathway;GO:0042594,biological_process,response to starvation;GO:…	-
LOC113841577	NW_020866210.1;NW_020866210.1;NW_020866210.1;NW_020866210.1	6;262;749;991	167;426;874;1080	+;+;+;+	543	0.911041773	0.573795638	0.867120312	46.38228911	33.11462742	41.65513638	8.90E-09	2.18E-06	-5.368990001	A0A1D5PHS2,Keratin 18	-	-	IPR018039,Intermediate filament protein, conserved site;IPR001664,Intermediate filament protein;IPR002957,Keratin, type I;IPR027695,Keratin, type I cytoskeletal 18	-	GO:0005882,cellular_component,intermediate filament;GO:0005198,molecular_function,structural molecule activity	-
SEMA3E	NC_040046.1;NC_040046.1;NC_040046.1;NC_040046.1;NC_040046.1;NC_040046.1;NC_040046.1;NC_040046.1;NC_040046.1;NC_040046.1;NC_040046.1;NC_040046.1;NC_040046.1;NC_040046.1;NC_040046.1;NC_040046.1;NC_040046.1;NC_040046.1;NC_040046.1;NC_040046.1;NC_040046.1;NC_040046.1;NC_040046.1;NC_040046.1;NC_040046.1;NC_040046.1;NC_040046.1;NC_040046.1;NC_040046.1;NC_040046.1;NC_040046.1;NC_040046.1;NC_040046.1;NC_…	193597224;193597224;193597224;193602342;193602342;193602342;193603066;193603066;193603066;193608887;193608887;193608887;193612357;193612357;193612357;193613580;193613580;193613580;193614931;193614931;193614931;193620470;193620470;193620470;193621961;193621961;193621961;193622353;193622353;193622353;193624949;193624949;193624949;193627176;193627176;193627176;193637646;193637646;193637646;193651405…	193600403;193600403;193600403;193602481;193602481;193602481;193603133;193603133;193603133;193609053;193609053;193609053;193612398;193612398;193612398;193613671;193613671;193613671;193615153;193615153;193615153;193620614;193620614;193620614;193622030;193622030;193622030;193622467;193622467;193622467;193625091;193625091;193625091;193627295;193627295;193627295;193637739;193637739;193637739;193651494…	-;-;-;-;-;-;-;-;-;-;-;-;-;-;-;-;-;-;-;-;-;-;-;-;-;-;-;-;-;-;-;-;-;-;-;-;-;-;-;-;-;-;-;-;-;-;-;-;-;-;-	5896	0.058087114	0.093945735	0.072598731	2.120987373	2.418133767	2.884016017	9.09E-09	2.19E-06	-4.711099953	R0LRL3,Semaphorin-3E	XP_005015529.1,semaphorin-3E isoform X2	PF01403,Sema domain	IPR001627,Sema domain;IPR015513,Semaphorin 3E;IPR036352,Sema domain superfamily;IPR016201,PSI domain;IPR015943,WD40/YVTN repeat-like-containing domain superfamily;IPR013783,Immunoglobulin-like fold;IPR027231,Semaphorin	-	GO:0016525,biological_process,negative regulation of angiogenesis;GO:0001569,biological_process,branching involved in blood vessel morphogenesis;GO:0071526,biological_process,semaphorin-plexin signaling pathway;GO:2000249,biological_process,regulation of actin cytoskeleton reorganization;GO:0030215,molecular_function,semaphorin receptor binding;GO:0001953,biological_process,negative regulation of…	-
LOC101790071	NC_040046.1;NC_040046.1;NC_040046.1;NC_040046.1;NC_040046.1;NC_040046.1;NC_040046.1;NC_040046.1;NC_040046.1;NC_040046.1;NC_040046.1;NC_040046.1;NC_040046.1;NC_040046.1;NC_040046.1;NC_040046.1;NC_040046.1;NC_040046.1;NC_040046.1;NC_040046.1;NC_040046.1;NC_040046.1;NC_040046.1;NC_040046.1;NC_040046.1;NC_040046.1;NC_040046.1;NC_040046.1;NC_040046.1;NC_040046.1;NC_040046.1;NC_040046.1;NC_040046.1;NC_…	201334700;201335487;201336340;201348497;201351685;201352350;201353080;201354129;201355223;201356526;201357979;201358403;201359053;201360934;201361275;201362433;201363336;201363734;201364570;201365145;201365766;201369049;201369343;201369794;201370449;201371919;201372350;201372751;201373268;201373629;201373800;201374549;201375355;201375542;201376112;201376360;201377770;201378425;201378682;201381584…	201334973;201335552;201336564;201348636;201351865;201352509;201353173;201354302;201355383;201356655;201358095;201358558;201359169;201361080;201361394;201362591;201363464;201363883;201364707;201365291;201365885;201369195;201369543;201369933;201370572;201372062;201372540;201372882;201373342;201373709;201373826;201374593;201375423;201375637;201376129;201376413;201377841;201378484;201378717;201381619…	+;+;+;+;+;+;+;+;+;+;+;+;+;+;+;+;+;+;+;+;+;+;+;+;+;+;+;+;+;+;+;+;+;+;+;+;+;+;+;+;+;+;+;+;+;+;+;+;+;+;+;+;+;+;+;+;+;+;+;+;+;+;+;+;+;+;+;+;+;+;+;+;+;+;+;+;+;+;+;+;+;+;+;+;+;+;+;+;+;+;+;+	8485	0.219755119	0.338641991	0.519603278	15.25349588	19.32341095	19.69995118	9.53E-09	2.23E-06	-5.356115759	A0A151NQQ7,Uncharacterized protein	-	PF00092,von Willebrand factor type A domain;PF00041,ibronectin type III domain;PF01391,Collagen triple helix repeat (20 copies);PF00014,Kunitz/Bovine pancreatic trypsin inhibitor domain	IPR008160,Collagen triple helix repeat;IPR003961,Fibronectin type III;IPR036465,von Willebrand factor A-like domain superfamily;IPR036116,Fibronectin type III superfamily;IPR020901,Proteinase inhibitor I2, Kunitz, conserved site;IPR036880,Pancreatic trypsin inhibitor Kunitz domain superfamily;IPR013783,Immunoglobulin-like fold;IPR002223,Pancreatic trypsin inhibitor Kunitz domain;IPR002035,von Wil…	-	GO:0010951,biological_process,negative regulation of endopeptidase activity;GO:0004867,molecular_function,serine-type endopeptidase inhibitor activity	-
LOC101798971	NC_040055.1;NC_040055.1;NC_040055.1;NC_040055.1;NC_040055.1	19311662;19320956;19323250;19324577;19326712	19313132;19321093;19323348;19324694;19326989	-;-;-;-;-	2104	25.59207337	25.15801157	28.76670887	7.065822223	7.366266805	6.976291777	9.58E-09	2.23E-06	2.206208357	U3IM44,Uncharacterized protein	-	PF13903,PMP-22/EMP/MP20/Claudin tight junction	IPR026763,Transmembrane protein 182;IPR004031,PMP-22/EMP/MP20/Claudin superfamily	-	GO:0016021,cellular_component,integral component of membrane;GO:0016020,cellular_component,membrane	-
ESRP2	NC_040057.1;NC_040057.1;NC_040057.1;NC_040057.1;NC_040057.1;NC_040057.1;NC_040057.1;NC_040057.1;NC_040057.1;NC_040057.1;NC_040057.1;NC_040057.1;NC_040057.1;NC_040057.1;NC_040057.1;NC_040057.1;NC_040057.1;NC_040057.1;NC_040057.1;NC_040057.1;NC_040057.1;NC_040057.1;NC_040057.1;NC_040057.1;NC_040057.1;NC_040057.1;NC_040057.1;NC_040057.1;NC_040057.1;NC_040057.1;NC_040057.1;NC_040057.1;NC_040057.1;NC_…	20834695;20834695;20834695;20834695;20835945;20835945;20838950;20838950;20845002;20846677;20846677;20846677;20846677;20846677;20846677;20846677;20847903;20847903;20847903;20847903;20847903;20847903;20847903;20849303;20849303;20849303;20849303;20849303;20849315;20849315;20850451;20850451;20850451;20850451;20850451;20850451;20850451;20852573;20852573;20852573;20852573;20852573;20852573;20852573;208…	20836081;20836081;20836081;20836081;20836081;20836081;20839061;20839061;20845035;20846854;20846854;20846854;20846854;20846854;20846854;20846854;20848095;20848095;20848095;20848095;20848095;20848095;20848095;20849501;20849501;20849501;20849501;20849501;20849501;20849501;20850672;20850672;20850672;20850672;20850672;20850672;20850672;20852874;20852874;20852874;20852874;20852874;20852874;20852874;208…	-;-;-;-;-;-;-;-;-;-;-;-;-;-;-;-;-;-;-;-;-;-;-;-;-;-;-;-;-;-;-;-;-;-;-;-;-;-;-;-;-;-;-;-;-;-;-;-;-;-;-;-;-;-;-;-;-;-;-;-;-;-;-;-;-;-;-;-;-;-;-;-;-;-;-;-;-;-;-;-;-;-;-;-;-;-;-;-;-;-;-;-;-;-;-;-;-;-;-;-;-;-;-;-;-;-;-;-;-;-;-;-;-;-;-;-;-;-;-	3948	0.125302858	0.09645619	0.151787985	7.708353455	5.60556237	5.536160146	1.06E-08	2.30E-06	-5.349928203	A0A1D5P2F1,Epithelial-splicing regulatory protein 2	XP_015147838.1,epithelial splicing regulatory protein 2 isoform X1	-	IPR034431,Epithelial splicing regulatory protein 2;IPR012677,Nucleotide-binding alpha-beta plait domain superfamily;IPR036397,Ribonuclease H superfamily;IPR000504,RNA recognition motif domain;IPR035979,RNA-binding domain superfamily;IPR012337,Ribonuclease H-like superfamily	-	GO:0003723,molecular_function,RNA binding;GO:0003676,molecular_function,nucleic acid binding;GO:0043484,biological_process,regulation of RNA splicing	-
FAT2	NC_040059.1;NC_040059.1;NC_040059.1;NC_040059.1;NC_040059.1;NC_040059.1;NC_040059.1;NC_040059.1;NC_040059.1;NC_040059.1;NC_040059.1;NC_040059.1;NC_040059.1;NC_040059.1;NC_040059.1;NC_040059.1;NC_040059.1;NC_040059.1;NC_040059.1;NC_040059.1;NC_040059.1;NC_040059.1;NC_040059.1;NC_040059.1;NC_040059.1;NC_040059.1	7914624;7916574;7918142;7920677;7920748;7923383;7924182;7926059;7926365;7927816;7928588;7930508;7931740;7932382;7933831;7935860;7940904;7941537;7943262;7945585;7946385;7947580;7954030;7954734;7956497;7969645	7915747;7917166;7918295;7920745;7921117;7923528;7924989;7926256;7926508;7927953;7928802;7930897;7931973;7932535;7934027;7939912;7941114;7941812;7943401;7945795;7946696;7947641;7954344;7956494;7958018;7970009	-;-;-;-;-;-;-;-;-;-;-;-;-;-;-;-;-;-;-;-;-;-;-;-;-;-	14162	0.056427326	0.041556493	0.090674082	2.741687175	2.456722824	2.531641551	1.05E-08	2.30E-06	-5.061196638	A0A0A0AZF9,Protocadherin Fat 2	-	PF00008,-like domain;PF02210,Laminin G domain;PF00028,Cadherin domain	IPR002126,Cadherin;IPR015919,Cadherin-like;IPR001791,Laminin G domain;IPR001881,EGF-like calcium-binding domain;IPR013320,Concanavalin A-like lectin/glucanase domain superfamily;IPR000742,EGF-like domain;IPR013032,EGF-like, conserved site;IPR020894,Cadherin conserved site	-	GO:0007155,biological_process,cell adhesion;GO:0007156,biological_process,homophilic cell adhesion via plasma membrane adhesion molecules;GO:0005509,molecular_function,calcium ion binding;GO:0005886,cellular_component,plasma membrane;GO:0016020,cellular_component,membrane;GO:0016021,cellular_component,integral component of membrane	-
MAPKBP1	NC_040050.1;NC_040050.1;NC_040050.1;NC_040050.1;NC_040050.1;NC_040050.1;NC_040050.1;NC_040050.1;NC_040050.1;NC_040050.1;NC_040050.1;NC_040050.1;NC_040050.1;NC_040050.1;NC_040050.1;NC_040050.1;NC_040050.1;NC_040050.1;NC_040050.1;NC_040050.1;NC_040050.1;NC_040050.1;NC_040050.1;NC_040050.1;NC_040050.1;NC_040050.1;NC_040050.1;NC_040050.1;NC_040050.1;NC_040050.1;NC_040050.1;NC_040050.1;NC_040050.1;NC_…	37886842;37887834;37887834;37887834;37887834;37887834;37887980;37888504;37888504;37888504;37888504;37888504;37888504;37888504;37914579;37914579;37914579;37914579;37914579;37914579;37914579;37939121;37939121;37939121;37939121;37939121;37939121;37939121;37939783;37939783;37939783;37939783;37939783;37939783;37939783;37942839;37942839;37942839;37942839;37942839;37942839;37942839;37944794;37944794;379…	37886980;37887968;37887968;37887968;37887968;37887968;37888274;37888846;37888846;37888846;37888846;37888846;37888846;37888846;37914670;37914670;37914670;37914670;37914670;37914670;37914670;37939183;37939183;37939183;37939183;37939183;37939183;37939183;37939840;37939840;37939840;37939840;37939840;37939840;37939840;37943009;37943009;37943009;37943009;37943009;37943009;37943009;37944931;37944931;379…	+;+;+;+;+;+;+;+;+;+;+;+;+;+;+;+;+;+;+;+;+;+;+;+;+;+;+;+;+;+;+;+;+;+;+;+;+;+;+;+;+;+;+;+;+;+;+;+;+;+;+;+;+;+;+;+;+;+;+;+;+;+;+;+;+;+;+;+;+;+;+;+;+;+;+;+;+;+;+;+;+;+;+;+;+;+;+;+;+;+;+;+;+;+;+;+;+;+;+;+;+;+;+;+;+;+;+;+;+;+;+;+;+;+;+;+;+;+;+;+;+;+;+;+;+;+;+;+;+;+;+;+;+;+;+;+;+;+;+;+;+;+;+;+;+;+;+;+;+;+;+;+;+;+;+;+;+;+;+;+;+;+;+;+;+;+;+;+;+;+;+;+;+;+;+;+;+;+;+;+;+;+;+;+;+;+;+;+;+;+;+;+;+;+;+;+;+;+;+;+…	10529	13.62539158	14.39800706	13.02135914	4.588858615	4.914506452	5.043013674	1.03E-08	2.30E-06	1.81226627	A0A226NYD3,Uncharacterized protein	-	-	IPR036322,WD40-repeat-containing domain superfamily;IPR015943,WD40/YVTN repeat-like-containing domain superfamily;IPR001680,WD40 repeat;IPR017986,WD40-repeat-containing domain	-	-	-
MAT1A	NC_040051.1;NC_040051.1;NC_040051.1;NC_040051.1;NC_040051.1;NC_040051.1;NC_040051.1;NC_040051.1;NC_040051.1	26659112;26660441;26661081;26663428;26664347;26666009;26667810;26668776;26676301	26659866;26660574;26661263;26663646;26664490;26666121;26667932;26668853;26676619	-;-;-;-;-;-;-;-;-	2068	324.4301287	411.7619096	364.8707182	100.5166874	93.38112313	89.32287345	1.05E-08	2.30E-06	2.266497863	R0LR17,S-adenosylmethionine synthase	XP_005015825.1,S-adenosylmethionine synthase	PF02773,S-adenosylmethionine synthetase, C-terminal domain;PF00438,S-adenosylmethionine synthetase, N-terminal domain;PF02772,S-adenosylmethionine synthetase, central domain	IPR022630,S-adenosylmethionine synthetase, C-terminal;IPR022628,S-adenosylmethionine synthetase, N-terminal;IPR022629,S-adenosylmethionine synthetase, central domain;IPR022636,S-adenosylmethionine synthetase superfamily;IPR022631,S-adenosylmethionine synthetase, conserved site;IPR002133,S-adenosylmethionine synthetase	-	GO:0009087,biological_process,methionine catabolic process;GO:0006556,biological_process,S-adenosylmethionine biosynthetic process;GO:0042802,molecular_function,identical protein binding;GO:0016740,molecular_function,transferase activity;GO:0046872,molecular_function,metal ion binding;GO:0051289,biological_process,protein homotetramerization;GO:0006730,biological_process,one-carbon metabolic proc…	K00789,ko01230,Biosynthesis of amino acids;K00789,ko00270,Cysteine and methionine metabolism
ROR2	NC_040075.1;NC_040075.1;NC_040075.1;NC_040075.1;NC_040075.1;NC_040075.1;NC_040075.1;NC_040075.1;NC_040075.1;NC_040075.1	45171308;45176045;45177798;45179814;45184004;45204161;45205329;45215120;45215167;45219868	45174350;45176247;45178043;45180128;45184131;45204191;45205616;45215164;45215196;45219910	-;-;-;-;-;-;-;-;-;-	4372	0.56575444	0.554284137	0.636384667	5.410615055	5.426973587	6.329337056	1.03E-08	2.30E-06	-2.972321087	A0A091F452,Tyrosine-protein kinase transmembrane receptor ROR2	-	PF01392,z domain;PF00051,Kringle domain;PF07714,Protein tyrosine kinase;PF07679,Immunoglobulin I-set domain	IPR000719,Protein kinase domain;IPR001245,Serine-threonine/tyrosine-protein kinase, catalytic domain;IPR000001,Kringle;IPR036790,Frizzled cysteine-rich domain superfamily;IPR038178,Kringle superfamily;IPR020067,Frizzled domain;IPR013806,Kringle-like fold;IPR036179,Immunoglobulin-like domain superfamily;IPR013783,Immunoglobulin-like fold;IPR008266,Tyrosine-protein kinase, active site;IPR007110,Imm…	-	GO:0016301,molecular_function,kinase activity;GO:0007169,biological_process,transmembrane receptor protein tyrosine kinase signaling pathway;GO:0005524,molecular_function,ATP binding;GO:0004672,molecular_function,protein kinase activity;GO:0016020,cellular_component,membrane;GO:0006468,biological_process,protein phosphorylation;GO:0000166,molecular_function,nucleotide binding;GO:0016310,biologica…	-
ABLIM3	NC_040055.1;NC_040055.1;NC_040055.1;NC_040055.1;NC_040055.1;NC_040055.1;NC_040055.1;NC_040055.1;NC_040055.1;NC_040055.1;NC_040055.1;NC_040055.1;NC_040055.1;NC_040055.1;NC_040055.1;NC_040055.1;NC_040055.1;NC_040055.1;NC_040055.1;NC_040055.1;NC_040055.1;NC_040055.1;NC_040055.1;NC_040055.1;NC_040055.1;NC_040055.1;NC_040055.1;NC_040055.1;NC_040055.1;NC_040055.1;NC_040055.1;NC_040055.1;NC_040055.1;NC_…	867771;867771;867771;867771;867771;867771;867771;867771;867771;867771;867771;867771;867771;867771;867771;867771;867771;867771;867771;867771;867771;867771;868899;868900;869202;869202;869202;869202;869202;869202;869202;869202;869202;869202;869202;869202;869202;869202;869202;869202;869202;869202;869202;869202;869202;869202;869202;869202;869640;869640;869804;869804;869804;869804;869804;869804;869804;…	868931;868931;868931;868931;868931;868931;868931;868931;868931;868931;868931;868931;868931;868931;868931;868931;868931;868931;868931;868931;868931;868931;868931;868931;869282;869282;869282;869282;869282;869282;869282;869282;869282;869282;869282;869282;869282;869282;869282;869282;869282;869282;869282;869282;869282;869282;869282;869282;869811;869811;869811;869811;869811;869811;869811;869811;869811;…	-;-;-;-;-;-;-;-;-;-;-;-;-;-;-;-;-;-;-;-;-;-;-;-;-;-;-;-;-;-;-;-;-;-;-;-;-;-;-;-;-;-;-;-;-;-;-;-;-;-;-;-;-;-;-;-;-;-;-;-;-;-;-;-;-;-;-;-;-;-;-;-;-;-;-;-;-;-;-;-;-;-;-;-;-;-;-;-;-;-;-;-;-;-;-;-;-;-;-;-;-;-;-;-;-;-;-;-;-;-;-;-;-;-;-;-;-;-;-;-;-;-;-;-;-;-;-;-;-;-;-;-;-;-;-;-;-;-;-;-;-;-;-;-;-;-;-;-;-;-;-;-;-;-;-;-;-;-;-;-;-;-;-;-;-;-;-;-;-;-;-;-;-;-;-;-;-;-;-;-;-;-;-;-;-;-;-;-;-;-;-;-;-;-;-;-;-;-;-;-…	4374	57.67186663	53.22652001	58.24660917	13.42538531	13.87340211	11.84603527	1.17E-08	2.34E-06	2.425520388	U3IYF8,Actin binding LIM protein family member 3	-	PF02209,Villin headpiece domain;PF16182,Putative adherens-junction anchoring region of AbLIM;PF00412,LIM domain	IPR028449,Actin-binding LIM protein 3;IPR001781,Zinc finger, LIM-type;IPR003128,Villin headpiece;IPR036886,Villin headpiece domain superfamily;IPR032402,Putative adherens-junction anchoring domain	-	GO:0030036,biological_process,actin cytoskeleton organization;GO:0001725,cellular_component,stress fiber;GO:0007010,biological_process,cytoskeleton organization;GO:0030032,biological_process,lamellipodium assembly;GO:0046872,molecular_function,metal ion binding;GO:0030027,cellular_component,lamellipodium;GO:0045944,biological_process,positive regulation of transcription by RNA polymerase II;GO:00…	-
ABRA	NC_040047.1;NC_040047.1	137267149;137273743	137269111;137274572	-;-	2793	11.51278889	11.37853391	9.287272588	1.596830285	1.561873726	1.67998039	1.13E-08	2.34E-06	3.05124506	R0JIG8,Actin-binding Rho-activating protein	-	PF14705,Costars	IPR026111,Actin-binding Rho-activating protein;IPR038095,Costars domain superfamily;IPR027817,Costars domain	-	GO:0003779,molecular_function,actin binding;GO:0035025,biological_process,positive regulation of Rho protein signal transduction	-
BMP5	NC_040048.1;NC_040048.1;NC_040048.1;NC_040048.1;NC_040048.1;NC_040048.1;NC_040048.1;NC_040048.1	92623207;92624520;92647008;92652500;92662980;92670971;92672894;92676818	92623897;92625037;92647200;92652648;92663177;92671047;92673004;92679003	+;+;+;+;+;+;+;+	4123	0.756824679	0.688517654	0.913599475	8.738631011	8.275104381	8.228985832	1.15E-08	2.34E-06	-3.108691569	A0A093HXR7,Bone morphogenetic protein 5	XP_009685326.1,bone morphogenetic protein 5 isoform X2	PF00019,Transforming growth factor beta like domain;PF00688,TGF-beta propeptide	IPR001839,Transforming growth factor-beta, C-terminal;IPR015615,Transforming growth factor-beta-related;IPR017948,Transforming growth factor beta, conserved site;IPR029034,Cystine-knot cytokine;IPR001111,TGF-beta, propeptide	-	GO:0008083,molecular_function,growth factor activity;GO:0010469,biological_process,regulation of signaling receptor activity;GO:0005576,cellular_component,extracellular region	-
DLX3	NC_040073.1;NC_040073.1;NC_040073.1	3898642;3899429;3901473	3899149;3899619;3902909	+;+;+	2136	0.338490996	0.24311098	0.300591375	11.36112294	8.169126059	10.28889171	1.15E-08	2.34E-06	-4.758133505	A0A0Q3U2G4,Homeobox protein DLX-3	-	PF12413,Homeobox protein distal-less-like N terminal;PF00046,Homeobox domain	IPR009057,Homeobox-like domain superfamily;IPR000047,Helix-turn-helix motif;IPR017970,Homeobox, conserved site;IPR020479,Homeobox domain, metazoa;IPR001356,Homeobox domain;IPR022135,Distal-less-like homeobox protein, N-terminal domain	-	GO:0043565,molecular_function,sequence-specific DNA binding;GO:0006355,biological_process,regulation of transcription, DNA-templated;GO:0003677,molecular_function,DNA binding;GO:0005634,cellular_component,nucleus	-
MYBPC1	NC_040046.1;NC_040046.1;NC_040046.1;NC_040046.1;NC_040046.1;NC_040046.1;NC_040046.1;NC_040046.1;NC_040046.1;NC_040046.1;NC_040046.1;NC_040046.1;NC_040046.1;NC_040046.1;NC_040046.1;NC_040046.1;NC_040046.1;NC_040046.1;NC_040046.1;NC_040046.1;NC_040046.1;NC_040046.1;NC_040046.1;NC_040046.1;NC_040046.1;NC_040046.1;NC_040046.1;NC_040046.1;NC_040046.1;NC_040046.1;NC_040046.1;NC_040046.1;NC_040046.1;NC_…	144551617;144551617;144551617;144551617;144551617;144551617;144551617;144551617;144551628;144574215;144574215;144574215;144574215;144574215;144574215;144574215;144574215;144574238;144577033;144577068;144577068;144577068;144577068;144577068;144577068;144577068;144577068;144582717;144582717;144582717;144582717;144583115;144583115;144583115;144583115;144583115;144583115;144584506;144584506;144584506…	144551764;144551764;144551764;144551764;144551764;144551764;144551764;144551764;144551764;144574247;144574247;144574247;144574247;144574247;144574247;144574247;144574247;144574247;144577109;144577109;144577109;144577109;144577109;144577109;144577109;144577109;144577109;144582752;144582752;144582752;144582752;144583150;144583150;144583150;144583150;144583150;144583150;144584541;144584541;144584541…	+;+;+;+;+;+;+;+;+;+;+;+;+;+;+;+;+;+;+;+;+;+;+;+;+;+;+;+;+;+;+;+;+;+;+;+;+;+;+;+;+;+;+;+;+;+;+;+;+;+;+;+;+;+;+;+;+;+;+;+;+;+;+;+;+;+;+;+;+;+;+;+;+;+;+;+;+;+;+;+;+;+;+;+;+;+;+;+;+;+;+;+;+;+;+;+;+;+;+;+;+;+;+;+;+;+;+;+;+;+;+;+;+;+;+;+;+;+;+;+;+;+;+;+;+;+;+;+;+;+;+;+;+;+;+;+;+;+;+;+;+;+;+;+;+;+;+;+;+;+;+;+;+;+;+;+;+;+;+;+;+;+;+;+;+;+;+;+;+;+;+;+;+;+;+;+;+;+;+;+;+;+;+;+;+;+;+;+;+;+;+;+;+;+;+;+;+;+;+;+…	4009	544.386415	518.4560616	504.6070973	91.14731308	82.17593421	71.66528086	1.17E-08	2.34E-06	2.990793552	E1C5Z5,Myosin binding protein C, slow type	-	PF00041,ibronectin type III domain;PF07679,Immunoglobulin I-set domain	IPR003961,Fibronectin type III;IPR007110,Immunoglobulin-like domain;IPR036116,Fibronectin type III superfamily;IPR036179,Immunoglobulin-like domain superfamily;IPR013783,Immunoglobulin-like fold;IPR003599,Immunoglobulin subtype;IPR003598,Immunoglobulin subtype 2;IPR013098,Immunoglobulin I-set	ENOG410IFCI,-;ENOG4110AYI,-	GO:0006941,biological_process,striated muscle contraction;GO:0045214,biological_process,sarcomere organization;GO:0031430,cellular_component,M band;GO:0097493,molecular_function,structural molecule activity conferring elasticity;GO:0005859,cellular_component,muscle myosin complex;GO:0007015,biological_process,actin filament organization;GO:0051015,molecular_function,actin filament binding;GO:0008…	-
RHOV	NC_040050.1;NC_040050.1;NC_040050.1	37062954;37065870;37069115	37065562;37065928;37069533	-;-;-	3087	0.123270211	0.168216732	0.221855325	5.396570698	5.169965294	4.8197728	1.12E-08	2.34E-06	-4.59751058	A0A218VAE9,Rho-related GTP-binding protein RhoV	-	-	IPR001806,Small GTPase superfamily;IPR005225,Small GTP-binding protein domain;IPR003578,Small GTPase superfamily, Rho type;IPR027417,P-loop containing nucleoside triphosphate hydrolase	-	GO:0005525,molecular_function,GTP binding;GO:0003924,molecular_function,GTPase activity;GO:0007264,biological_process,small GTPase mediated signal transduction;GO:0000166,molecular_function,nucleotide binding;GO:0005622,cellular_component,intracellular	-
TMOD1	NC_040075.1;NC_040075.1;NC_040075.1;NC_040075.1;NC_040075.1;NC_040075.1;NC_040075.1;NC_040075.1;NC_040075.1;NC_040075.1;NC_040075.1;NC_040075.1;NC_040075.1;NC_040075.1;NC_040075.1;NC_040075.1;NC_040075.1;NC_040075.1;NC_040075.1;NC_040075.1;NC_040075.1;NC_040075.1;NC_040075.1;NC_040075.1;NC_040075.1;NC_040075.1;NC_040075.1;NC_040075.1;NC_040075.1;NC_040075.1;NC_040075.1;NC_040075.1;NC_040075.1;NC_…	63507115;63507829;63509718;63510198;63510198;63510198;63512397;63512397;63512397;63513147;63514772;63514772;63514772;63514772;63516888;63516888;63516888;63516888;63517898;63517898;63517898;63517898;63519448;63519448;63519448;63519448;63520144;63520144;63520144;63520144;63521071;63521071;63521071;63521071;63523640;63523640;63523640;63523640	63507161;63507908;63509835;63510361;63510361;63510361;63512553;63512553;63512553;63513363;63514891;63514891;63514891;63514891;63516977;63516977;63516977;63516977;63518028;63518028;63518028;63518028;63519555;63519555;63519555;63519555;63520287;63520287;63520287;63520287;63521215;63521215;63521215;63521215;63525153;63525153;63525153;63525153	+;+;+;+;+;+;+;+;+;+;+;+;+;+;+;+;+;+;+;+;+;+;+;+;+;+;+;+;+;+;+;+;+;+;+;+;+;+	3035	292.4415689	275.13838	282.4936942	80.93801781	82.58252153	79.08511412	1.20E-08	2.35E-06	2.125225675	U3I563,Tropomodulin 1	-	PF03250,Tropomodulin	IPR004934,Tropomodulin;IPR032675,Leucine-rich repeat domain superfamily;IPR030135,Tropomodulin-1	-	GO:0005884,cellular_component,actin filament;GO:0008180,cellular_component,COP9 signalosome;GO:0030017,cellular_component,sarcomere;GO:0005523,molecular_function,tropomyosin binding;GO:0030863,cellular_component,cortical cytoskeleton;GO:0030016,cellular_component,myofibril;GO:0005865,cellular_component,striated muscle thin filament;GO:0006936,biological_process,muscle contraction;GO:0008344,biolo…	-
GRHL1	NC_040048.1;NC_040048.1;NC_040048.1;NC_040048.1;NC_040048.1;NC_040048.1;NC_040048.1;NC_040048.1;NC_040048.1;NC_040048.1;NC_040048.1;NC_040048.1;NC_040048.1;NC_040048.1;NC_040048.1;NC_040048.1;NC_040048.1;NC_040048.1;NC_040048.1;NC_040048.1;NC_040048.1;NC_040048.1;NC_040048.1;NC_040048.1;NC_040048.1;NC_040048.1;NC_040048.1;NC_040048.1;NC_040048.1;NC_040048.1;NC_040048.1;NC_040048.1;NC_040048.1;NC_…	102555561;102555561;102555590;102555937;102556004;102557337;102557337;102557964;102557964;102557964;102557964;102557964;102560248;102560248;102560248;102560248;102560248;102561721;102561721;102561721;102561721;102561721;102562491;102562491;102562491;102562491;102562491;102563038;102563038;102563038;102563038;102563038;102563543;102563543;102563543;102563543;102563543;102565215;102565215;102565215…	102555718;102555718;102555718;102556085;102556085;102557402;102557402;102558150;102558150;102558150;102558150;102558150;102560318;102560318;102560318;102560318;102560318;102562111;102562111;102562111;102562111;102562111;102562567;102562567;102562567;102562567;102562567;102563194;102563194;102563194;102563194;102563194;102563654;102563654;102563654;102563654;102563654;102565309;102565309;102565309…	+;+;+;+;+;+;+;+;+;+;+;+;+;+;+;+;+;+;+;+;+;+;+;+;+;+;+;+;+;+;+;+;+;+;+;+;+;+;+;+;+;+;+;+;+;+;+;+;+;+;+;+;+;+;+;+;+;+;+;+;+;+;+;+;+;+;+;+;+;+;+;+;+;+;+;+;+;+;+;+;+;+	4269	0.356556702	0.381141524	0.421123658	9.750801564	7.693014929	6.7826644	1.21E-08	2.35E-06	-4.077566115	A0A1D5NZ26,Grainyhead like transcription factor 1	XP_015131563.1,grainyhead-like protein 1 homolog isoform X1	-	IPR007604,CP2 transcription factor	-	-	-
NT5C2	NC_040051.1;NC_040051.1;NC_040051.1;NC_040051.1;NC_040051.1;NC_040051.1;NC_040051.1;NC_040051.1;NC_040051.1;NC_040051.1;NC_040051.1;NC_040051.1;NC_040051.1;NC_040051.1;NC_040051.1;NC_040051.1;NC_040051.1;NC_040051.1;NC_040051.1;NC_040051.1;NC_040051.1;NC_040051.1;NC_040051.1;NC_040051.1;NC_040051.1;NC_040051.1;NC_040051.1;NC_040051.1;NC_040051.1;NC_040051.1;NC_040051.1;NC_040051.1;NC_040051.1;NC_…	13393535;13411892;13420646;13421401;13422417;13422947;13422947;13422947;13422947;13437492;13437492;13437492;13437492;13438963;13438963;13438963;13438963;13440362;13440362;13440362;13440362;13440629;13440629;13440629;13440629;13442178;13442178;13442178;13442178;13443013;13443246;13443246;13443246;13443246;13443246;13444462;13444462;13444462;13444462;13444462;13445186;13445186;13445186;13445186;134…	13393657;13412012;13420743;13421570;13422846;13423020;13423020;13423020;13423020;13437609;13437609;13437609;13437609;13439058;13439058;13439058;13439058;13440453;13440453;13440453;13440453;13440686;13440686;13440686;13440686;13442271;13442271;13442271;13442271;13443139;13443299;13443299;13443299;13443299;13443299;13444545;13444545;13444545;13444545;13444545;13445227;13445227;13445227;13445227;134…	+;+;+;+;+;+;+;+;+;+;+;+;+;+;+;+;+;+;+;+;+;+;+;+;+;+;+;+;+;+;+;+;+;+;+;+;+;+;+;+;+;+;+;+;+;+;+;+;+;+;+;+;+;+;+;+;+;+;+;+;+;+;+;+;+;+;+;+;+;+;+;+;+;+;+;+;+;+;+;+	3939	168.6275927	171.7679118	178.2585149	44.22449411	50.09713432	41.96732547	1.28E-08	2.44E-06	2.24069639	A0A218V9W1,Cytosolic purine 5'-nucleotidase	-	-	IPR008380,HAD-superfamily hydrolase, subfamily IG, 5'-nucleotidase;IPR023214,HAD superfamily;IPR036412,HAD-like superfamily;IPR016695,Purine 5'-nucleotidase	-	GO:0046872,molecular_function,metal ion binding	-
106080c6-30bd-4d9c-a717-e72792ad37f2	NC_040070.1	4105054	4107437	-	2384	0.239430667	0.203299517	0.197502655	9.060459483	7.944137442	6.476550627	1.30E-08	2.45E-06	-4.873664272	-	-	-	-	-	-	-
AXIN2	NC_040064.1;NC_040064.1;NC_040064.1;NC_040064.1;NC_040064.1;NC_040064.1;NC_040064.1;NC_040064.1;NC_040064.1;NC_040064.1;NC_040064.1;NC_040064.1;NC_040064.1;NC_040064.1;NC_040064.1;NC_040064.1;NC_040064.1;NC_040064.1;NC_040064.1;NC_040064.1;NC_040064.1;NC_040064.1;NC_040064.1;NC_040064.1;NC_040064.1;NC_040064.1;NC_040064.1;NC_040064.1;NC_040064.1;NC_040064.1;NC_040064.1;NC_040064.1;NC_040064.1;NC_…	9799879;9826656;9826656;9827250;9827878;9827878;9827878;9827878;9834763;9834763;9834763;9834763;9840245;9840245;9840245;9840245;9842015;9842015;9842015;9842015;9842376;9842376;9842376;9842376;9843037;9843037;9843037;9843040;9843504;9843504;9843504;9843504;9844379;9844379;9844379;9844379;9845698;9845698;9845698;9845698;9850181;9850181;9850181;9850181	9799900;9826818;9826818;9827268;9828807;9828807;9828807;9828807;9834903;9834903;9834903;9834903;9840347;9840347;9840347;9840347;9842155;9842155;9842155;9842155;9842872;9842872;9842872;9842872;9843219;9843219;9843219;9843219;9843734;9843734;9843734;9843734;9844474;9844474;9844474;9844474;9845865;9845865;9845865;9845865;9851334;9851334;9851334;9851334	+;+;+;+;+;+;+;+;+;+;+;+;+;+;+;+;+;+;+;+;+;+;+;+;+;+;+;+;+;+;+;+;+;+;+;+;+;+;+;+;+;+;+;+	3848	2.986528389	3.301760469	2.981166517	14.23788669	14.71911153	15.08074353	1.33E-08	2.45E-06	-1.933230742	U3IUE4,Axin 2	-	PF00778,IX domain;PF08833,Axin beta-catenin binding domain;PF16646,Axin-1 tankyrase binding domain;PF00615,Regulator of G protein signaling domain	IPR014936,Axin beta-catenin binding;IPR036305,RGS domain superfamily;IPR038207,DIX domain superfamily;IPR001158,DIX domain;IPR024066,RGS, subdomain 1/3;IPR029071,Ubiquitin-like domain superfamily;IPR032101,Axin-1/2, tankyrase-binding domain;IPR016137,RGS domain	-	GO:0048255,biological_process,mRNA stabilization;GO:0035414,-,-;GO:0016055,biological_process,Wnt signaling pathway;GO:0010942,biological_process,positive regulation of cell death;GO:0061181,biological_process,regulation of chondrocyte development;GO:0070411,molecular_function,I-SMAD binding;GO:0090090,biological_process,negative regulation of canonical Wnt signaling pathway;GO:0005634,cellular_c…	-
FOXD3	NC_040053.1	6881595	6883604	-	2010	40.74187176	50.18894338	50.44934214	7.961860293	6.952034326	5.626552004	1.32E-08	2.45E-06	3.088409336	A0A0Q3U4E4,Forkhead box protein D3	-	PF00250,orkhead domain	IPR018122,Fork head domain conserved site1;IPR001766,Fork head domain;IPR036390,Winged helix DNA-binding domain superfamily;IPR030456,Fork head domain conserved site 2;IPR036388,Winged helix-like DNA-binding domain superfamily	-	GO:0006355,biological_process,regulation of transcription, DNA-templated;GO:0043565,molecular_function,sequence-specific DNA binding;GO:0003700,molecular_function,DNA binding transcription factor activity;GO:0003677,molecular_function,DNA binding;GO:0005634,cellular_component,nucleus	-
ENPP2	NC_040047.1;NC_040047.1;NC_040047.1;NC_040047.1;NC_040047.1;NC_040047.1;NC_040047.1;NC_040047.1;NC_040047.1;NC_040047.1;NC_040047.1;NC_040047.1;NC_040047.1;NC_040047.1;NC_040047.1;NC_040047.1;NC_040047.1;NC_040047.1;NC_040047.1;NC_040047.1;NC_040047.1;NC_040047.1;NC_040047.1;NC_040047.1;NC_040047.1;NC_040047.1;NC_040047.1;NC_040047.1;NC_040047.1;NC_040047.1;NC_040047.1;NC_040047.1;NC_040047.1;NC_…	142798676;142798676;142798676;142798676;142798676;142798676;142798676;142804130;142804130;142804130;142804130;142804130;142804130;142804130;142804898;142804898;142804898;142804898;142804898;142804898;142804898;142807562;142807562;142807562;142807562;142807562;142807562;142807562;142808801;142808801;142808801;142808801;142808801;142808801;142808801;142809445;142809445;142809445;142809445;142809445…	142799292;142799292;142799292;142799292;142799292;142799292;142799292;142804286;142804286;142804286;142804286;142804286;142804286;142804286;142805030;142805030;142805030;142805030;142805030;142805030;142805030;142807639;142807639;142807639;142807639;142807639;142807639;142807639;142808936;142808936;142808936;142808936;142808936;142808936;142808936;142809581;142809581;142809581;142809581;142809581…	-;-;-;-;-;-;-;-;-;-;-;-;-;-;-;-;-;-;-;-;-;-;-;-;-;-;-;-;-;-;-;-;-;-;-;-;-;-;-;-;-;-;-;-;-;-;-;-;-;-;-;-;-;-;-;-;-;-;-;-;-;-;-;-;-;-;-;-;-;-;-;-;-;-;-;-;-;-;-;-;-;-;-;-;-;-;-;-;-;-;-;-;-;-;-;-;-;-;-;-;-;-;-;-;-;-;-;-;-;-;-;-;-;-;-;-;-;-;-;-;-;-;-;-;-;-;-;-;-;-;-;-;-;-;-;-;-;-;-;-;-;-;-;-;-;-;-;-;-;-;-;-;-;-;-;-;-;-;-;-;-;-;-;-;-;-;-;-;-;-;-;-;-;-;-;-;-;-;-;-	3639	0.564685287	0.627879701	0.858672014	9.384226966	8.537560494	8.992850829	1.35E-08	2.45E-06	-3.407633898	U3IHB1,Ectonucleotide pyrophosphatase/phosphodiesterase 2	-	PF01223,NA/RNA non-specific endonuclease;PF01663,Type I phosphodiesterase / nucleotide pyrophosphatase;PF01033,Somatomedin B domain	IPR020436,Somatomedin B, chordata;IPR029881,Ectonucleotide pyrophosphatase/phosphodiesterase family member 2;IPR001212,Somatomedin B domain;IPR036024,Somatomedin B-like domain superfamily;IPR017850,Alkaline-phosphatase-like, core domain superfamily;IPR020821,Extracellular Endonuclease, subunit A;IPR001604,DNA/RNA non-specific endonuclease;IPR002591,Type I phosphodiesterase/nucleotide pyrophosphat…	-	GO:0008152,biological_process,metabolic process;GO:0030247,molecular_function,polysaccharide binding;GO:0003676,molecular_function,nucleic acid binding;GO:0005509,molecular_function,calcium ion binding;GO:0006935,biological_process,chemotaxis;GO:0090305,biological_process,nucleic acid phosphodiester bond hydrolysis;GO:0005615,cellular_component,extracellular space;GO:0016787,molecular_function,hy…	-
LOC106018502	NC_040047.1;NC_040047.1;NC_040047.1;NC_040047.1	63592444;63593896;63598893;63600117	63593267;63594011;63599581;63601875	-;-;-;-	3388	2.86412222	2.59540345	2.678421752	0.154870025	0.198894119	0.189393848	1.39E-08	2.49E-06	4.206160748	-	-	-	-	-	-	-
SLIT3	NC_040059.1;NC_040059.1;NC_040059.1;NC_040059.1;NC_040059.1;NC_040059.1;NC_040059.1;NC_040059.1;NC_040059.1;NC_040059.1;NC_040059.1;NC_040059.1;NC_040059.1;NC_040059.1;NC_040059.1;NC_040059.1;NC_040059.1;NC_040059.1;NC_040059.1;NC_040059.1;NC_040059.1;NC_040059.1;NC_040059.1;NC_040059.1;NC_040059.1;NC_040059.1;NC_040059.1;NC_040059.1;NC_040059.1;NC_040059.1;NC_040059.1;NC_040059.1;NC_040059.1;NC_…	16521161;16521161;16521163;16521163;16521694;16521694;16521694;16521694;16548092;16548092;16548092;16551196;16551196;16551196;16578848;16578848;16578848;16578848;16786332;16786332;16786332;16786332;16813002;16813002;16813002;16813002;16832876;16832876;16832876;16832876;16837908;16837908;16837908;16837908;16852731;16852731;16852731;16852731;16868875;16868875;16868875;16868875;16874389;16874389;168…	16521607;16521607;16521607;16521607;16521948;16521948;16521948;16521948;16548163;16548163;16548163;16551267;16551267;16551267;16578919;16578919;16578919;16578919;16786403;16786403;16786403;16786403;16813073;16813073;16813073;16813073;16832947;16832947;16832947;16832947;16838071;16838071;16838071;16838071;16852872;16852872;16852872;16852872;16868946;16868946;16868946;16868946;16874460;16874460;168…	+;+;+;+;+;+;+;+;+;+;+;+;+;+;+;+;+;+;+;+;+;+;+;+;+;+;+;+;+;+;+;+;+;+;+;+;+;+;+;+;+;+;+;+;+;+;+;+;+;+;+;+;+;+;+;+;+;+;+;+;+;+;+;+;+;+;+;+;+;+;+;+;+;+;+;+;+;+;+;+;+;+;+;+;+;+;+;+;+;+;+;+;+;+;+;+;+;+;+;+;+;+;+;+;+;+;+;+;+;+;+;+;+;+;+;+;+;+;+;+;+;+;+;+;+;+;+;+;+;+;+;+;+;+;+;+;+;+;+;+;+;+;+;+;+	8276	1.181700472	1.146158405	1.406808314	10.41347472	9.170753806	12.83662229	1.46E-08	2.60E-06	-2.800937949	A0A1V4KVG1,Slit-like protein 3 protein	-	-	IPR001611,Leucine-rich repeat;IPR018097,EGF-like calcium-binding, conserved site;IPR000483,Cysteine-rich flanking region, C-terminal;IPR001881,EGF-like calcium-binding domain;IPR032675,Leucine-rich repeat domain superfamily;IPR009030,Growth factor receptor cysteine-rich domain superfamily;IPR006207,Cystine knot, C-terminal;IPR000372,Leucine-rich repeat N-terminal domain;IPR013320,Concanavalin A-l…	-	GO:0005576,cellular_component,extracellular region;GO:0005509,molecular_function,calcium ion binding	-
90f94d91-05c3-431c-affe-ba3ffa853938	NC_040069.1	442832	443583	+	752	1.922916933	2.716118626	2.33374027	56.69128484	37.06947615	51.25011372	1.72E-08	2.65E-06	-4.062327909	-	-	-	-	-	-	-
CAV3	NC_040058.1;NC_040058.1	750290;754245	751177;754399	-;-	1043	241.4920513	232.6078394	225.471083	54.03785899	55.08615369	45.29500046	1.54E-08	2.65E-06	2.49304629	R0LYE5,Caveolin	-	PF01146,Caveolin	IPR031091,Caveolin-3;IPR001612,Caveolin;IPR018361,Caveolin, conserved site	-	GO:0006469,biological_process,negative regulation of protein kinase activity;GO:0070836,biological_process,caveola assembly;GO:0045792,biological_process,negative regulation of cell size;GO:0051924,biological_process,regulation of calcium ion transport;GO:0051896,biological_process,regulation of protein kinase B signaling;GO:0071253,molecular_function,connexin binding;GO:0051001,biological_proces…	-
CDH11	NC_040057.1;NC_040057.1;NC_040057.1;NC_040057.1;NC_040057.1;NC_040057.1;NC_040057.1;NC_040057.1;NC_040057.1;NC_040057.1;NC_040057.1;NC_040057.1;NC_040057.1;NC_040057.1;NC_040057.1;NC_040057.1;NC_040057.1;NC_040057.1;NC_040057.1;NC_040057.1;NC_040057.1;NC_040057.1;NC_040057.1;NC_040057.1;NC_040057.1;NC_040057.1;NC_040057.1;NC_040057.1;NC_040057.1;NC_040057.1;NC_040057.1;NC_040057.1;NC_040057.1;NC_…	11153808;11153808;11153808;11153808;11153808;11153808;11157762;11157762;11157762;11157762;11157762;11157762;11163653;11163653;11163653;11163653;11163653;11163653;11164583;11164583;11164583;11164583;11164583;11164583;11164919;11164919;11164919;11164919;11164919;11164919;11166055;11166055;11166055;11166055;11166055;11166055;11167763;11167763;11167763;11167763;11167763;11167763;11170872;11170872;111…	11156712;11156712;11156712;11156712;11156712;11156712;11158013;11158013;11158013;11158013;11158013;11158013;11163770;11163770;11163770;11163770;11163770;11163770;11164704;11164704;11164704;11164704;11164704;11164704;11165055;11165055;11165055;11165055;11165055;11165055;11166308;11166308;11166308;11166308;11166308;11166308;11167950;11167950;11167950;11167950;11167950;11167950;11171039;11171039;111…	-;-;-;-;-;-;-;-;-;-;-;-;-;-;-;-;-;-;-;-;-;-;-;-;-;-;-;-;-;-;-;-;-;-;-;-;-;-;-;-;-;-;-;-;-;-;-;-;-;-;-;-;-;-;-;-;-;-;-;-;-;-;-;-;-;-;-;-;-;-;-;-;-;-;-;-;-;-;-;-;-;-;-;-;-;-;-	5578	15.82038348	16.40958144	17.55755406	73.77118985	71.80299532	89.00129777	1.69E-08	2.65E-06	-1.919055939	R0L5Y7,Cadherin-11	XP_005020058.1,cadherin-11;XP_012955507.1,-	PF00028,Cadherin domain;PF01049,Cadherin cytoplasmic region	IPR020894,Cadherin conserved site;IPR002126,Cadherin;IPR015919,Cadherin-like;IPR000233,Cadherin, cytoplasmic domain;IPR027397,Catenin binding domain superfamily	-	GO:0007155,biological_process,cell adhesion;GO:0007156,biological_process,homophilic cell adhesion via plasma membrane adhesion molecules;GO:0005509,molecular_function,calcium ion binding;GO:0005886,cellular_component,plasma membrane;GO:0016020,cellular_component,membrane;GO:0016021,cellular_component,integral component of membrane	-
CRYBG1	NC_040048.1;NC_040048.1;NC_040048.1;NC_040048.1;NC_040048.1;NC_040048.1;NC_040048.1;NC_040048.1;NC_040048.1;NC_040048.1;NC_040048.1;NC_040048.1;NC_040048.1;NC_040048.1;NC_040048.1;NC_040048.1;NC_040048.1;NC_040048.1;NC_040048.1;NC_040048.1;NC_040048.1;NC_040048.1	71720714;71726022;71729022;71730432;71732354;71736008;71736400;71740549;71743808;71744050;71744916;71745454;71745803;71748325;71749418;71750962;71751179;71753420;71753681;71760451;71782136;71815460	71722411;71726184;71729180;71730555;71732493;71736137;71736552;71740613;71743954;71744176;71745058;71745489;71745929;71748464;71749571;71751080;71751226;71753596;71755142;71761940;71782265;71815695	-;-;-;-;-;-;-;-;-;-;-;-;-;-;-;-;-;-;-;-;-;-	7168	0.350381128	0.284949945	0.292606916	5.886522948	4.740009977	4.576617252	1.70E-08	2.65E-06	-3.71707792	A0A226NJV4,Uncharacterized protein	-	-	IPR035992,Ricin B-like lectins;IPR011024,Gamma-crystallin-like;IPR001064,Beta/gamma crystallin;IPR000772,Ricin B, lectin domain	-	-	-
CTHRC1	NC_040047.1;NC_040047.1;NC_040047.1;NC_040047.1	135649602;135653173;135653991;135654748	135649792;135653394;135654207;135654896	+;+;+;+	779	18.70923733	22.04239504	24.17696172	128.0877825	109.4482316	131.5354252	1.56E-08	2.65E-06	-2.196043269	H0ZPH9,Collagen triple helix repeat containing 1	-	-	-	ENOG410IHSA,-;ENOG4111TT8,-	GO:0060122,biological_process,inner ear receptor cell stereocilium organization;GO:0090103,biological_process,cochlea morphogenesis;GO:0005737,cellular_component,cytoplasm;GO:0005109,molecular_function,frizzled binding;GO:0045669,biological_process,positive regulation of osteoblast differentiation;GO:0017147,molecular_function,Wnt-protein binding;GO:0033690,biological_process,positive regulation …	-
DLX4	NC_040073.1;NC_040073.1;NC_040073.1	3907755;3909317;3910686	3908457;3909510;3911075	-;-;-	1287	0.14783805	0.188292948	0.066517812	9.410891078	10.08589127	8.849710818	1.61E-08	2.65E-06	-5.75621872	A0A226NCC0,Uncharacterized protein	-	-	IPR017970,Homeobox, conserved site;IPR001356,Homeobox domain;IPR020479,Homeobox domain, metazoa;IPR009057,Homeobox-like domain superfamily;IPR000047,Helix-turn-helix motif	-	GO:0006355,biological_process,regulation of transcription, DNA-templated;GO:0043565,molecular_function,sequence-specific DNA binding;GO:0003677,molecular_function,DNA binding;GO:0005634,cellular_component,nucleus	-
EN1	NC_040052.1;NC_040052.1	35697499;35700691	35698327;35701126	-;-	1265	0.691882074	0.602069626	0.744421074	12.47803505	11.91544175	11.15941489	1.54E-08	2.65E-06	-3.809792785	A0A226P0N7,Homeobox protein engrailed-like	-	-	IPR009057,Homeobox-like domain superfamily;IPR017970,Homeobox, conserved site;IPR019549,Homeobox engrailed, C-terminal;IPR020479,Homeobox domain, metazoa;IPR000747,Homeobox domain engrailed;IPR019737,Homeobox engrailed-type, conserved site;IPR001356,Homeobox domain	-	GO:0043565,molecular_function,sequence-specific DNA binding;GO:0006355,biological_process,regulation of transcription, DNA-templated;GO:0003677,molecular_function,DNA binding;GO:0007275,biological_process,multicellular organism development;GO:0005634,cellular_component,nucleus	-
IRX3	NC_040057.1;NC_040057.1;NC_040057.1;NC_040057.1;NC_040057.1;NC_040057.1;NC_040057.1	19464948;19466005;19466476;19466999;19467779;19468750;19468908	19465340;19466071;19466885;19467047;19468445;19468905;19469400	-;-;-;-;-;-;-	2235	0.664021051	0.604089994	0.919285085	24.9046476	20.21639171	17.11828031	1.58E-08	2.65E-06	-4.530240277	A0A218UY75,Iroquois-class homeodomain protein irx-3	-	-	IPR017970,Homeobox, conserved site;IPR008422,Homeobox KN domain;IPR001356,Homeobox domain;IPR009057,Homeobox-like domain superfamily;IPR003893,Iroquois-class homeodomain protein	-	GO:0043565,molecular_function,sequence-specific DNA binding;GO:0006355,biological_process,regulation of transcription, DNA-templated;GO:0003677,molecular_function,DNA binding;GO:0005634,cellular_component,nucleus	-
LOC101798185	NC_040061.1;NC_040061.1;NC_040061.1	11302581;11309758;11319862	11307884;11309867;11320439	-;-;-	5992	1.295546873	1.808369175	1.64301881	9.54476992	11.3465035	12.02053546	1.64E-08	2.65E-06	-2.481774733	A0A087RB53,Protein FAM101A	-	PF15068,AM101 family	IPR028215,Refilin family	-	GO:0061181,biological_process,regulation of chondrocyte development;GO:0061572,biological_process,actin filament bundle organization;GO:0031005,molecular_function,filamin binding	-
LOC113843885	NC_040050.1;NC_040050.1	35882559;35885792	35885124;35887220	-;-	3995	10.37303549	10.83197857	11.85017728	2.75812079	3.293584949	3.061768439	1.72E-08	2.65E-06	2.170888809	-	-	-	-	-	-	-
SCD	NC_040051.1;NC_040051.1;NC_040051.1;NC_040051.1;NC_040051.1;NC_040051.1	20162217;20166178;20173128;20176159;20177142;20178584	20162472;20166463;20173258;20176364;20177374;20182239	+;+;+;+;+;+	4768	2.857205962	3.630348521	3.456296463	19.34976671	22.32986948	27.44543467	1.65E-08	2.65E-06	-2.481939362	A0A0H3U2H5,SCD1	XP_012960226.1,-	PF00487,atty acid desaturase	IPR005804,Fatty acid desaturase domain;IPR015876,Acyl-CoA desaturase;IPR001522,Fatty acid desaturase type 1, conserved site	-	GO:0006629,biological_process,lipid metabolic process;GO:0006633,biological_process,fatty acid biosynthetic process;GO:0016717,molecular_function,oxidoreductase activity, acting on paired donors, with oxidation of a pair of donors resulting in the reduction of molecular oxygen to two molecules of water;GO:0016020,cellular_component,membrane;GO:0055114,biological_process,oxidation-reduction proces…	K00507,ko01212,Fatty acid metabolism;K00507,ko04212,Longevity regulating pathway - worm;K00507,ko01040,Biosynthesis of unsaturated fatty acids;K00507,ko04152,AMPK signaling pathway;K00507,ko03320,PPAR signaling pathway
SUSD5	NC_040047.1;NC_040047.1;NC_040047.1;NC_040047.1;NC_040047.1;NC_040047.1;NC_040047.1	64440681;64454433;64462655;64475891;64485581;64488640;64490290	64444236;64454621;64462773;64476068;64486504;64488701;64492880	-;-;-;-;-;-;-	7619	0.059934659	0.118138088	0.151688374	4.688712543	4.012555345	5.658479893	1.57E-08	2.65E-06	-5.137582415	R0LX51,Sushi domain containing 5	-	PF00084,Sushi repeat (SCR repeat);PF00193,xtracellular link domain	IPR016187,C-type lectin fold;IPR000538,Link domain;IPR000436,Sushi/SCR/CCP domain;IPR016186,C-type lectin-like/link domain superfamily;IPR035976,Sushi/SCR/CCP superfamily	-	GO:0005540,molecular_function,hyaluronic acid binding;GO:0007155,biological_process,cell adhesion;GO:0007219,biological_process,Notch signaling pathway;GO:0016021,cellular_component,integral component of membrane;GO:0016020,cellular_component,membrane	-
TNNI2	NC_040050.1;NC_040050.1;NC_040050.1;NC_040050.1;NC_040050.1;NC_040050.1;NC_040050.1;NC_040050.1	32187693;32189516;32189719;32190888;32191238;32191576;32191800;32192304	32187814;32189545;32189725;32190929;32191366;32191665;32191976;32192604	+;+;+;+;+;+;+;+	898	2835.368179	2453.901369	2576.165289	587.65776	591.507474	585.5741413	1.66E-08	2.65E-06	2.475110051	U3IUV2,Troponin I2, fast skeletal type	-	PF00992,Troponin	IPR001978,Troponin;IPR038077,Troponin domain superfamily	-	GO:0045893,biological_process,positive regulation of transcription, DNA-templated;GO:0003009,biological_process,skeletal muscle contraction;GO:0005861,cellular_component,troponin complex;GO:0003779,molecular_function,actin binding;GO:0031014,molecular_function,troponin T binding;GO:0005634,cellular_component,nucleus	-
JPH2	NC_040066.1;NC_040066.1;NC_040066.1;NC_040066.1;NC_040066.1;NC_040066.1;NC_040066.1	1727015;1730534;1731919;1736254;1747916;1748492;1755601	1729566;1730631;1732724;1736372;1748489;1748698;1756167	-;-;-;-;-;-;-	4923	162.5873684	179.2410685	167.5128873	64.17081283	65.37753491	65.90342298	1.83E-08	2.79E-06	1.695184753	G1MY82,Junctophilin 2	-	PF02493,MORN repeat	IPR003409,MORN motif;IPR017191,Junctophilin	KOG0231,Junctional membrane complex protein Junctophilin and related MORN repeat proteins;COG4642,Uncharacterized protein conserved in bacteria	GO:0015278,molecular_function,calcium-release channel activity;GO:0030314,cellular_component,junctional membrane complex;GO:0010314,molecular_function,phosphatidylinositol-5-phosphate binding;GO:0005547,molecular_function,phosphatidylinositol-3,4,5-trisphosphate binding;GO:0005546,molecular_function,phosphatidylinositol-4,5-bisphosphate binding;GO:0070273,molecular_function,phosphatidylinositol-4…	-
f3673127-da51-4d6c-809a-6f792077b26a	NC_040046.1	19707544	19710374	+	2831	200.0800271	248.3250103	255.9936806	65.1163813	73.38735602	78.63586063	1.90E-08	2.81E-06	2.009252446	R0JPL3,Protein shisa-2-like protein	-	PF13908,Wnt and FGF inhibitory regulator	IPR026910,Shisa family	-	GO:0016021,cellular_component,integral component of membrane;GO:0016020,cellular_component,membrane	-
MTCL1	NC_040047.1;NC_040047.1;NC_040047.1;NC_040047.1;NC_040047.1;NC_040047.1;NC_040047.1;NC_040047.1;NC_040047.1;NC_040047.1;NC_040047.1;NC_040047.1;NC_040047.1;NC_040047.1;NC_040047.1;NC_040047.1;NC_040047.1;NC_040047.1;NC_040047.1;NC_040047.1;NC_040047.1;NC_040047.1;NC_040047.1;NC_040047.1;NC_040047.1;NC_040047.1;NC_040047.1;NC_040047.1;NC_040047.1;NC_040047.1;NC_040047.1;NC_040047.1;NC_040047.1;NC_…	106536904;106536904;106536905;106536905;106536905;106536905;106536905;106536905;106536905;106536905;106536905;106547851;106547851;106547851;106547851;106547851;106547851;106547851;106547851;106547851;106547851;106547851;106549570;106549570;106549570;106549570;106549570;106549570;106549570;106549570;106549570;106549570;106549570;106589491;106589491;106589491;106589491;106589491;106589491;106589491…	106537301;106537301;106537301;106537301;106537301;106537301;106537301;106537301;106537301;106537301;106537301;106548075;106548075;106548075;106548075;106548075;106548075;106548075;106548075;106548075;106548075;106548075;106549728;106549728;106549728;106549728;106549728;106549728;106549728;106549728;106549728;106549728;106549728;106589550;106589550;106589550;106589550;106589550;106589550;106589550…	+;+;+;+;+;+;+;+;+;+;+;+;+;+;+;+;+;+;+;+;+;+;+;+;+;+;+;+;+;+;+;+;+;+;+;+;+;+;+;+;+;+;+;+;+;+;+;+;+;+;+;+;+;+;+;+;+;+;+;+;+;+;+;+;+;+;+;+;+;+;+;+;+;+;+;+;+;+;+;+;+;+;+;+;+;+;+;+;+;+;+;+;+;+;+;+;+;+;+;+;+;+;+;+;+;+;+;+;+;+;+;+;+;+;+;+;+;+;+;+;+;+;+;+;+;+;+;+;+;+;+;+;+;+;+;+;+;+;+;+;+;+;+;+;+;+;+;+;+;+;+;+;+;+;+;+;+;+;+;+;+;+;+;+;+;+;+;+;+	9351	28.36820088	26.15954216	26.88366333	7.037330825	6.079770821	5.828417937	1.89E-08	2.81E-06	2.418399642	A0A1V4J954,Microtubule cross-linking factor 1	-	-	IPR027881,Protein SOGA;IPR027882,Domain of unknown function DUF4482	-	GO:0010506,biological_process,regulation of autophagy;GO:0005615,cellular_component,extracellular space	-
TMEM182	NC_040046.1;NC_040046.1;NC_040046.1;NC_040046.1;NC_040046.1;NC_040046.1;NC_040046.1;NC_040046.1;NC_040046.1	64514559;64514559;64526382;64535254;64535254;64537210;64537210;64537717;64537717	64516046;64516046;64526519;64535352;64535352;64537309;64537309;64538067;64538062	-;-;-;-;-;-;-;-;-	2176	59.54605484	59.67641642	53.66263315	18.96892101	19.00427922	18.50393559	1.89E-08	2.81E-06	1.929838245	R0LJK1,Transmembrane protein 182	-	PF13903,PMP-22/EMP/MP20/Claudin tight junction	IPR026763,Transmembrane protein 182;IPR004031,PMP-22/EMP/MP20/Claudin superfamily	-	GO:0016021,cellular_component,integral component of membrane;GO:0016020,cellular_component,membrane	-
TRPS1	NC_040047.1;NC_040047.1;NC_040047.1;NC_040047.1;NC_040047.1;NC_040047.1;NC_040047.1;NC_040047.1;NC_040047.1;NC_040047.1;NC_040047.1;NC_040047.1;NC_040047.1;NC_040047.1;NC_040047.1;NC_040047.1;NC_040047.1;NC_040047.1;NC_040047.1;NC_040047.1;NC_040047.1;NC_040047.1;NC_040047.1;NC_040047.1;NC_040047.1;NC_040047.1;NC_040047.1;NC_040047.1;NC_040047.1;NC_040047.1;NC_040047.1;NC_040047.1;NC_040047.1;NC_…	141092104;141092104;141092104;141092104;141092104;141092104;141092104;141092104;141092104;141102991;141102991;141102991;141102991;141102991;141102991;141102991;141102991;141102991;141242776;141242776;141242776;141242776;141242776;141242776;141242776;141242776;141242776;141251193;141251193;141251193;141251193;141251193;141251193;141251193;141251193;141251193;141252380;141252693;141252693;141252693…	141098398;141098398;141098398;141098398;141098398;141098398;141098398;141098398;141098398;141103113;141103113;141103113;141103113;141103113;141103113;141103113;141103113;141103113;141243379;141243379;141243379;141243379;141243379;141243379;141243379;141243379;141243379;141251970;141251970;141251970;141251970;141251970;141251657;141251970;141251970;141251970;141253044;141253044;141253044;141253044…	-;-;-;-;-;-;-;-;-;-;-;-;-;-;-;-;-;-;-;-;-;-;-;-;-;-;-;-;-;-;-;-;-;-;-;-;-;-;-;-;-;-;-;-;-;-;-;-;-;-;-;-;-;-;-;-;-;-;-;-;-;-;-;-;-;-;-;-;-;-;-;-;-	16297	1.146485574	1.565576829	1.646820936	9.315401451	8.617856611	8.989412159	1.93E-08	2.82E-06	-2.3206476	U3IQP4,Transcriptional repressor GATA binding 1	-	PF00320,ATA zinc finger	IPR013087,Zinc finger C2H2-type;IPR028440,Transcription factor TRPS1;IPR036236,Zinc finger C2H2 superfamily;IPR000679,Zinc finger, GATA-type;IPR013088,Zinc finger, NHR/GATA-type	-	GO:0006355,biological_process,regulation of transcription, DNA-templated;GO:0032991,cellular_component,protein-containing complex;GO:0043565,molecular_function,sequence-specific DNA binding;GO:0003676,molecular_function,nucleic acid binding;GO:0003700,molecular_function,DNA binding transcription factor activity;GO:0046872,molecular_function,metal ion binding;GO:0000122,biological_process,negative…	-
PFKM	NC_040073.1;NC_040073.1;NC_040073.1;NC_040073.1;NC_040073.1;NC_040073.1;NC_040073.1;NC_040073.1;NC_040073.1;NC_040073.1;NC_040073.1;NC_040073.1;NC_040073.1;NC_040073.1;NC_040073.1;NC_040073.1;NC_040073.1;NC_040073.1;NC_040073.1;NC_040073.1;NC_040073.1	6125081;6125607;6125830;6126030;6126217;6127084;6127349;6127507;6127858;6128076;6128191;6129014;6129257;6129445;6129875;6130070;6130195;6130557;6132105;6132275;6133098	6125486;6125712;6125929;6126141;6126278;6127248;6127505;6127634;6128004;6128137;6128257;6129139;6129349;6129540;6129983;6130114;6130360;6130746;6132182;6132348;6133319	-;-;-;-;-;-;-;-;-;-;-;-;-;-;-;-;-;-;-;-;-	2711	120.743758	127.1747163	109.1973178	19.09640908	13.78868457	13.56529068	1.97E-08	2.86E-06	3.254314795	A0A1D5PG85,ATP-dependent 6-phosphofructokinase	NP_989554.3,ATP-dependent 6-phosphofructokinase, muscle type;XP_015128526.1,-	-	IPR022953,ATP-dependent 6-phosphofructokinase;IPR035966,Phosphofructokinase superfamily;IPR009161,ATP-dependent 6-phosphofructokinase, eukaryotic-type;IPR015912,Phosphofructokinase, conserved site;IPR000023,Phosphofructokinase domain	-	GO:0016301,molecular_function,kinase activity;GO:0016310,biological_process,phosphorylation;GO:0006096,biological_process,glycolytic process;GO:0005737,cellular_component,cytoplasm;GO:0006002,biological_process,fructose 6-phosphate metabolic process;GO:0003824,molecular_function,catalytic activity;GO:0016740,molecular_function,transferase activity;GO:0046872,molecular_function,metal ion binding;G…	K00850,ko04152,AMPK signaling pathway;K00850,ko01230,Biosynthesis of amino acids;K00850,ko00010,Glycolysis / Gluconeogenesis;K00850,ko03018,RNA degradation;K00850,ko00052,Galactose metabolism;K00850,ko00680,Methane metabolism;K00850,ko01200,Carbon metabolism;K00850,ko00051,Fructose and mannose metabolism;K00850,ko00030,Pentose phosphate pathway;K00850,ko05230,Central carbon metabolism in cancer
SRL	NC_040060.1;NC_040060.1;NC_040060.1;NC_040060.1;NC_040060.1;NC_040060.1;NC_040060.1;NC_040060.1;NC_040060.1;NC_040060.1;NC_040060.1;NC_040060.1;NC_040060.1;NC_040060.1;NC_040060.1;NC_040060.1;NC_040060.1;NC_040060.1;NC_040060.1;NC_040060.1;NC_040060.1	11795563;11795563;11795563;11799841;11799841;11799841;11800418;11800418;11800418;11803963;11806972;11806972;11806972;11807907;11807907;11807907;11809640;11809640;11817891;11817891;11817891	11799183;11799183;11799183;11800074;11800074;11800074;11800534;11800534;11800534;11803998;11807067;11807067;11807067;11808005;11808005;11808005;11810860;11810860;11818037;11818045;11818037	-;-;-;-;-;-;-;-;-;-;-;-;-;-;-;-;-;-;-;-;-	5579	209.011262	194.4410243	203.7707583	57.79314074	63.60860637	60.75645325	2.01E-08	2.88E-06	2.05433285	A0A1V4KT84,Sarcalumenin isoform C	-	-	IPR022812,Dynamin superfamily;IPR031692,EH domain-containing protein, N-terminal;IPR030381,Dynamin-type guanine nucleotide-binding (G) domain;IPR027417,P-loop containing nucleoside triphosphate hydrolase	-	GO:0005525,molecular_function,GTP binding	-
LOC101799338	NC_040047.1;NC_040047.1;NC_040047.1;NC_040047.1;NC_040047.1;NC_040047.1;NC_040047.1;NC_040047.1;NC_040047.1;NC_040047.1;NC_040047.1;NC_040047.1;NC_040047.1;NC_040047.1;NC_040047.1	112646839;112652782;112654252;112655378;112656890;112657820;112658827;112659993;112660320;112661242;112663148;112665829;112667297;112668386;112674802	112649652;112653165;112654376;112655608;112657117;112657962;112659086;112660178;112660454;112661402;112663292;112665987;112667431;112668421;112674997	-;-;-;-;-;-;-;-;-;-;-;-;-;-;-	5338	0.14970472	0.175105488	0.096225279	5.054010261	4.365143683	3.884197103	2.08E-08	2.93E-06	-4.648210825	U3IJF7,Desmoglein 2	-	PF00028,Cadherin domain	IPR002126,Cadherin;IPR015919,Cadherin-like;IPR027397,Catenin binding domain superfamily;IPR009123,Desmoglein;IPR009122,Desmosomal cadherin;IPR020894,Cadherin conserved site	-	GO:0086073,biological_process,bundle of His cell-Purkinje myocyte adhesion involved in cell communication;GO:0030054,cellular_component,cell junction;GO:0086091,biological_process,regulation of heart rate by cardiac conduction;GO:0003165,biological_process,Purkinje myocyte development;GO:0030057,cellular_component,desmosome;GO:0007156,biological_process,homophilic cell adhesion via plasma membran…	-
LOC113842961	NC_040047.1;NC_040047.1;NC_040047.1;NC_040047.1;NC_040047.1;NC_040047.1;NC_040047.1	155775307;155775498;155775694;155775914;155776354;155776589;155776784	155775495;155775621;155775821;155776027;155776496;155776709;155777091	+;+;+;+;+;+;+	1127	204.3814734	298.5159503	268.1435095	67.23635653	61.96315795	67.68242067	2.08E-08	2.93E-06	2.275600219	A0A1D5P8W3,Glycine N-methyltransferase	XP_015139032.1,glycine N-methyltransferase isoform X1	-	IPR014369,Glycine/Sarcosine N-methyltransferase;IPR029063,S-adenosyl-L-methionine-dependent methyltransferase;IPR025714,Methyltransferase domain	-	GO:0032259,biological_process,methylation;GO:0017174,molecular_function,glycine N-methyltransferase activity;GO:0016740,molecular_function,transferase activity;GO:0008168,molecular_function,methyltransferase activity	K00552,ko00260,Glycine, serine and threonine metabolism
CLMP	NC_040070.1;NC_040070.1;NC_040070.1;NC_040070.1;NC_040070.1;NC_040070.1;NC_040070.1;NC_040070.1	5050463;5055421;5057198;5057662;5058671;5059635;5095761;5096266	5053954;5055562;5057320;5057829;5058872;5059792;5096103;5096368	-;-;-;-;-;-;-;-	4731	5.268453118	5.663730439	5.519038086	20.62864808	19.71580635	22.90454574	2.16E-08	2.94E-06	-1.62710265	E1BXB7,CXADR like membrane protein	XP_015153658.1,-;XP_417886.3,CXADR-like membrane protein	PF13927,Immunoglobulin domain;PF07686,Immunoglobulin V-set domain	IPR007110,Immunoglobulin-like domain;IPR036179,Immunoglobulin-like domain superfamily;IPR013783,Immunoglobulin-like fold;IPR003599,Immunoglobulin subtype;IPR003598,Immunoglobulin subtype 2;IPR013106,Immunoglobulin V-set domain	ENOG4111I1J,-;ENOG410IEC5,-	GO:0005881,cellular_component,cytoplasmic microtubule;GO:0048565,biological_process,digestive tract development;GO:0005923,cellular_component,bicellular tight junction;GO:0016021,cellular_component,integral component of membrane;GO:0016020,cellular_component,membrane	-
COL17A1	NC_040051.1;NC_040051.1;NC_040051.1;NC_040051.1;NC_040051.1;NC_040051.1;NC_040051.1;NC_040051.1;NC_040051.1;NC_040051.1;NC_040051.1;NC_040051.1;NC_040051.1;NC_040051.1;NC_040051.1;NC_040051.1;NC_040051.1;NC_040051.1;NC_040051.1;NC_040051.1;NC_040051.1;NC_040051.1;NC_040051.1;NC_040051.1;NC_040051.1;NC_040051.1;NC_040051.1;NC_040051.1;NC_040051.1;NC_040051.1;NC_040051.1;NC_040051.1;NC_040051.1;NC_…	12548263;12552128;12552920;12553711;12555774;12556278;12557286;12558953;12559397;12560521;12561436;12561620;12562057;12563409;12564110;12564336;12564463;12565270;12566069;12566533;12567029;12567534;12567770;12568384;12569114;12569291;12569706;12569940;12570367;12570787;12571193;12571596;12572303;12572908;12573161;12574096;12574886;12575740;12575915;12576755;12576977;12577556;12577669;12577869;125…	12548517;12552193;12552964;12553809;12555908;12556325;12557321;12559000;12559540;12560676;12561507;12561691;12562122;12563573;12564199;12564380;12564612;12565485;12566107;12566559;12567055;12567596;12567874;12568446;12569149;12569344;12569741;12569975;12570429;12570822;12571237;12571622;12572338;12572943;12573241;12574131;12574966;12575793;12575956;12576817;12577036;12577582;12577710;12577925;125…	+;+;+;+;+;+;+;+;+;+;+;+;+;+;+;+;+;+;+;+;+;+;+;+;+;+;+;+;+;+;+;+;+;+;+;+;+;+;+;+;+;+;+;+;+;+;+;+;+;+;+;+;+;+;+;+;+	5461	0.1533011	0.386698263	0.485966147	26.09406313	23.67861145	22.11199183	2.13E-08	2.94E-06	-5.836555544	A0A091FKR4,Collagen alpha-1	-	PF01391,Collagen triple helix repeat (20 copies)	IPR008160,Collagen triple helix repeat	-	GO:0005581,cellular_component,collagen trimer;GO:0016021,cellular_component,integral component of membrane;GO:0016020,cellular_component,membrane	-
d153bb0c-43d4-4995-8819-c5f945c42983	NC_040047.1	67947570	67951541	-	3972	1.053848576	1.368374509	1.799673557	31.90205549	30.7335954	23.40418262	2.14E-08	2.94E-06	-4.051150206	R0KCY9,Desmoplakin	XP_005010786.1,-	PF00681,Plectin repeat	IPR035915,Plakin repeat superfamily;IPR028462,Desmoplakin;IPR001101,Plectin repeat	-	GO:0098609,biological_process,cell-cell adhesion;GO:0005856,cellular_component,cytoskeleton;GO:0030054,cellular_component,cell junction;GO:0050839,molecular_function,cell adhesion molecule binding	K10381,ko05412,Arrhythmogenic right ventricular cardiomyopathy (ARVC)
MYOZ1	NC_040051.1;NC_040051.1;NC_040051.1;NC_040051.1;NC_040051.1;NC_040051.1;NC_040051.1;NC_040051.1;NC_040051.1;NC_040051.1;NC_040051.1	21666928;21666928;21668374;21668374;21669755;21669755;21677646;21677646;21679402;21681599;21681599	21667512;21667512;21668533;21668533;21669989;21669989;21677827;21677827;21679503;21681793;21681794	-;-;-;-;-;-;-;-;-;-;-	1460	188.7297912	158.3226619	135.0678107	24.40811707	21.08524311	22.79893303	2.19E-08	2.94E-06	3.142014277	U3IEV0,Myozenin 1	XP_005015740.1,myozenin-1 isoform X1	PF05556,Calcineurin-binding protein (Calsarcin)	IPR008438,Myozenin	-	-	-
RASSF3	NC_040046.1;NC_040046.1;NC_040046.1;NC_040046.1;NC_040046.1;NC_040046.1;NC_040046.1;NC_040046.1;NC_040046.1;NC_040046.1;NC_040046.1;NC_040046.1;NC_040046.1;NC_040046.1;NC_040046.1;NC_040046.1;NC_040046.1;NC_040046.1;NC_040046.1;NC_040046.1;NC_040046.1;NC_040046.1;NC_040046.1;NC_040046.1;NC_040046.1;NC_040046.1;NC_040046.1;NC_040046.1;NC_040046.1;NC_040046.1;NC_040046.1	167545981;167545981;167545981;167545981;167545981;167545981;167549023;167549023;167549023;167549023;167549023;167549023;167550108;167550108;167550108;167550108;167550108;167550108;167551661;167551661;167551661;167551661;167551661;167551661;167552191;167556091;167557994;167558285;167598965;167626810;167645810	167548650;167548650;167548650;167548650;167548650;167548650;167549138;167549138;167549138;167549138;167549138;167549138;167550375;167550375;167550375;167550375;167550375;167550375;167551768;167551768;167551768;167551768;167551768;167551768;167552280;167556129;167558089;167558308;167599217;167626931;167645945	-;-;-;-;-;-;-;-;-;-;-;-;-;-;-;-;-;-;-;-;-;-;-;-;-;-;-;-;-;-;-	3922	117.7990092	124.291226	117.4223647	42.53206586	40.52090141	38.1817659	2.21E-08	2.94E-06	1.880729602	R0JAZ7,Ras association domain family member 3	-	PF00788,Ras association (RalGDS/AF-6) domain;PF16517,Novel Ras effector 1 C-terminal SARAH (Sav/Rassf/Hpo) domain	IPR000159,Ras-associating (RA) domain;IPR033614,C-terminal RASSF family;IPR029071,Ubiquitin-like domain superfamily;IPR033619,Ras association domain-containing protein 3;IPR011524,SARAH domain	-	GO:0042981,biological_process,regulation of apoptotic process;GO:0005829,cellular_component,cytosol;GO:0042802,molecular_function,identical protein binding;GO:0005886,cellular_component,plasma membrane;GO:0007165,biological_process,signal transduction	-
SOSTDC1	NC_040047.1;NC_040047.1;NC_040047.1;NC_040047.1	30510215;30511408;30513434;30514427	30511539;30511539;30513599;30515443	-;-;-;-	2508	0.409667017	0.469316634	0.768018154	20.17136795	15.93705705	14.91912655	2.20E-08	2.94E-06	-4.658378901	G1NCI5,Sclerostin domain containing 1	XP_003207162.1,sclerostin domain-containing protein 1	PF05463,Sclerostin (SOST)	IPR006207,Cystine knot, C-terminal;IPR008835,Sclerostin/Sclerostin domain-containing protein 1;IPR029034,Cystine-knot cytokine	-	GO:0005615,cellular_component,extracellular space	-
COL9A2	NC_040069.1;NC_040069.1;NC_040069.1;NC_040069.1;NC_040069.1;NC_040069.1;NC_040069.1;NC_040069.1;NC_040069.1;NC_040069.1;NC_040069.1;NC_040069.1;NC_040069.1;NC_040069.1;NC_040069.1;NC_040069.1;NC_040069.1;NC_040069.1;NC_040069.1;NC_040069.1;NC_040069.1;NC_040069.1;NC_040069.1;NC_040069.1;NC_040069.1;NC_040069.1;NC_040069.1;NC_040069.1;NC_040069.1;NC_040069.1;NC_040069.1;NC_040069.1;NC_040069.1	432344;433882;434663;434681;434795;435334;435633;435860;436017;436370;436561;436919;437153;437625;438313;438512;438651;438872;439113;439363;439541;439695;440048;440173;440687;440871;441017;441188;441367;442067;442218;442555;442832	432536;433956;434678;434697;434857;435387;435668;435883;436070;436423;436608;436975;437206;437678;438366;438565;438704;438925;439166;439416;439585;439748;440101;440226;440758;440906;441061;441220;441513;442121;442406;442632;443583	+;+;+;+;+;+;+;+;+;+;+;+;+;+;+;+;+;+;+;+;+;+;+;+;+;+;+;+;+;+;+;+;+	2737	6.965586605	12.4967393	11.72932365	245.8471211	192.5942974	199.6855385	2.32E-08	3.01E-06	-4.056021995	A0A1U8DF37,LOW QUALITY PROTEIN: collagen alpha-2	XP_014378936.1,collagen alpha-2(IX) chain	-	IPR008160,Collagen triple helix repeat	-	GO:0005581,cellular_component,collagen trimer	K08131,ko04512,ECM-receptor interaction;K08131,ko04151,PI3K-Akt signaling pathway;K08131,ko04510,Focal adhesion;K08131,ko04974,Protein digestion and absorption
DLX5	NC_040047.1;NC_040047.1;NC_040047.1	26121544;26122417;26123097	26122254;26122601;26123698	-;-;-	1498	0.152417279	0.092440597	0.200019681	17.98036168	10.58296727	14.9118892	2.29E-08	3.01E-06	-6.299147245	A0A091GKI8,Homeobox protein DLX-5	XP_009557146.1,homeobox protein DLX-5	PF12413,Homeobox protein distal-less-like N terminal;PF00046,Homeobox domain	IPR009057,Homeobox-like domain superfamily;IPR000047,Helix-turn-helix motif;IPR017970,Homeobox, conserved site;IPR020479,Homeobox domain, metazoa;IPR001356,Homeobox domain;IPR022135,Distal-less-like homeobox protein, N-terminal domain	-	GO:0043565,molecular_function,sequence-specific DNA binding;GO:0006355,biological_process,regulation of transcription, DNA-templated;GO:0003677,molecular_function,DNA binding;GO:0005634,cellular_component,nucleus	-
PTN	NC_040046.1;NC_040046.1;NC_040046.1;NC_040046.1;NC_040046.1	142509265;142531263;142532486;142534191;142585838	142515898;142531424;142532659;142534300;142586200	-;-;-;-;-	7443	6.820285871	6.888451455	6.538813488	84.44212353	61.71639644	103.5606221	2.32E-08	3.01E-06	-3.303193603	A0A226NYK8,Uncharacterized protein	-	-	IPR020089,Pleiotrophin/Midkine, N-terminal domain;IPR020092,Pleiotrophin/Midkine heparin-binding growth factor, conserved site;IPR020091,Pleiotrophin/Midkine disulphide-rich domain superfamily;IPR037122,Pleiotrophin/Midkine, N-terminal domain superfamily;IPR000762,Midkine heparin-binding growth factor;IPR020090,Pleiotrophin/Midkine, C-terminal domain;IPR038130,Pleiotrophin/Midkine, C-terminal dom…	-	GO:0008083,molecular_function,growth factor activity;GO:0010469,biological_process,regulation of signaling receptor activity	-
c0609ae1-a397-45ae-b27f-910e96482db4	NC_040075.1	8398052	8401059	-	3008	35.90288327	37.91057099	34.28036775	14.10014008	13.38226954	13.8391306	2.41E-08	3.05E-06	1.702025083	R0JU45,Kinesin-like protein KIF24	-	PF00225,Kinesin motor domain	IPR019821,Kinesin motor domain, conserved site;IPR013761,Sterile alpha motif/pointed domain superfamily;IPR027417,P-loop containing nucleoside triphosphate hydrolase;IPR001752,Kinesin motor domain;IPR036961,Kinesin motor domain superfamily;IPR027640,Kinesin-like protein	-	GO:0007018,biological_process,microtubule-based movement;GO:0008017,molecular_function,microtubule binding;GO:0000166,molecular_function,nucleotide binding;GO:0003777,molecular_function,microtubule motor activity;GO:0005524,molecular_function,ATP binding	-
FSD2	NC_040056.1;NC_040056.1;NC_040056.1;NC_040056.1;NC_040056.1;NC_040056.1;NC_040056.1;NC_040056.1;NC_040056.1;NC_040056.1;NC_040056.1;NC_040056.1;NC_040056.1;NC_040056.1;NC_040056.1;NC_040056.1;NC_040056.1;NC_040056.1;NC_040056.1;NC_040056.1;NC_040056.1;NC_040056.1;NC_040056.1;NC_040056.1;NC_040056.1;NC_040056.1;NC_040056.1;NC_040056.1;NC_040056.1;NC_040056.1;NC_040056.1;NC_040056.1;NC_040056.1;NC_…	10253523;10253523;10253524;10255658;10255658;10255658;10256518;10256518;10256518;10257623;10257623;10257623;10259257;10259257;10259257;10260275;10260275;10260275;10261479;10261479;10261479;10262653;10262653;10262653;10263230;10263230;10263230;10264660;10264660;10264660;10266984;10266984;10266984;10270692;10270692;10270692;10273115;10273115;10273115	10253749;10253737;10254048;10256436;10256436;10256436;10256613;10256613;10256613;10257856;10257856;10257856;10259279;10259279;10259279;10260396;10260396;10260396;10261634;10261634;10261634;10262787;10262787;10262787;10263383;10263383;10263383;10264793;10264793;10264793;10267116;10267116;10267116;10270868;10270868;10270868;10274573;10274573;10274573	+;+;+;+;+;+;+;+;+;+;+;+;+;+;+;+;+;+;+;+;+;+;+;+;+;+;+;+;+;+;+;+;+;+;+;+;+;+;+	4128	6.959884473	4.771853922	6.242280885	0.370730127	0.395211785	0.301169711	2.39E-08	3.05E-06	4.388289021	U3IAM9,Fibronectin type III and SPRY domain containing 2	-	PF00041,ibronectin type III domain;PF00622,SPRY domain	IPR003961,Fibronectin type III;IPR003879,Butyrophylin-like, SPRY domain;IPR001870,B30.2/SPRY domain;IPR036116,Fibronectin type III superfamily;IPR013320,Concanavalin A-like lectin/glucanase domain superfamily;IPR013783,Immunoglobulin-like fold;IPR003877,SPRY domain	-	-	-
SHISA2	NC_040046.1;NC_040046.1;NC_040046.1	19704883;19707544;19707798	19705278;19707795;19710374	+;+;+	3225	183.1406485	229.69843	237.0092433	60.87600539	68.46855159	73.59266465	2.42E-08	3.05E-06	1.990297347	Q71SY8,Shisa	NP_989832.1,protein shisa-2 homolog precursor	PF13908,Wnt and FGF inhibitory regulator	IPR026910,Shisa family	ENOG410IE4F,-;ENOG410ZKJD,-	GO:0008150,biological_process,biological_process;GO:0005575,cellular_component,cellular_component;GO:0003674,molecular_function,molecular_function;GO:0016021,cellular_component,integral component of membrane;GO:0016020,cellular_component,membrane	-
WNT5A	NC_040058.1;NC_040058.1;NC_040058.1;NC_040058.1;NC_040058.1;NC_040058.1;NC_040058.1;NC_040058.1;NC_040058.1;NC_040058.1	10324373;10327252;10327844;10327844;10329146;10329146;10334262;10334262;10336059;10336059	10325219;10327453;10327977;10327977;10329411;10329411;10334554;10334554;10338916;10338919	+;+;+;+;+;+;+;+;+;+	4603	3.802871271	4.09140515	4.017253854	15.71173173	14.67796164	16.81533874	2.43E-08	3.05E-06	-1.671433896	A0A1V4KAI2,Protein Wnt	-	-	IPR026538,Wnt-5a protein;IPR018161,Wnt protein, conserved site;IPR005817,Wnt	-	GO:0016055,biological_process,Wnt signaling pathway;GO:0005578,,;GO:0007275,biological_process,multicellular organism development;GO:0005576,cellular_component,extracellular region;GO:0005102,molecular_function,signaling receptor binding	-
CCNI	NC_040049.1;NC_040049.1;NC_040049.1;NC_040049.1;NC_040049.1;NC_040049.1;NC_040049.1;NC_040049.1;NC_040049.1;NC_040049.1;NC_040049.1;NC_040049.1;NC_040049.1;NC_040049.1	15944620;15944620;15946648;15946648;15947686;15947686;15948002;15948002;15951706;15951706;15959021;15959021;15968758;15981680	15946311;15946311;15946878;15946878;15947826;15947826;15948076;15948076;15951840;15951840;15959177;15959177;15968994;15982013	-;-;-;-;-;-;-;-;-;-;-;-;-;-	3002	338.8182468	419.3604471	321.9298779	74.15184031	91.13405404	80.67586453	2.50E-08	3.06E-06	2.446188173	U3ITR1,Cyclin I	-	PF00134,Cyclin, N-terminal domain	IPR013763,Cyclin-like;IPR036915,Cyclin-like superfamily;IPR006671,Cyclin, N-terminal;IPR028856,Cyclin I	-	GO:0051726,biological_process,regulation of cell cycle	-
COL11A1	NC_040053.1;NC_040053.1;NC_040053.1;NC_040053.1;NC_040053.1;NC_040053.1;NC_040053.1;NC_040053.1;NC_040053.1;NC_040053.1;NC_040053.1;NC_040053.1;NC_040053.1;NC_040053.1;NC_040053.1;NC_040053.1;NC_040053.1;NC_040053.1;NC_040053.1;NC_040053.1;NC_040053.1;NC_040053.1;NC_040053.1;NC_040053.1;NC_040053.1;NC_040053.1;NC_040053.1;NC_040053.1;NC_040053.1;NC_040053.1;NC_040053.1;NC_040053.1;NC_040053.1;NC_…	32623853;32623853;32623854;32623854;32623854;32623854;32640283;32640283;32640283;32640283;32640283;32640283;32643584;32643584;32643584;32643584;32643584;32643584;32646133;32646133;32646133;32646133;32646133;32646133;32657721;32657721;32657721;32657721;32657721;32657721;32671097;32671097;32671485;32671485;32671816;32671816;32671816;32671816;32671816;32671816;32674301;32674301;32674301;32676162;326…	32624266;32624266;32624266;32624266;32624266;32624266;32640450;32640450;32640450;32640450;32640450;32640450;32643797;32643797;32643797;32643797;32643797;32643797;32646295;32646295;32646295;32646295;32646295;32646295;32657849;32657849;32657849;32657849;32657849;32657849;32671213;32671213;32671631;32671631;32671911;32671911;32671911;32671911;32671911;32671911;32674546;32674546;32674546;32676224;326…	+;+;+;+;+;+;+;+;+;+;+;+;+;+;+;+;+;+;+;+;+;+;+;+;+;+;+;+;+;+;+;+;+;+;+;+;+;+;+;+;+;+;+;+;+;+;+;+;+;+;+;+;+;+;+;+;+;+;+;+;+;+;+;+;+;+;+;+;+;+;+;+;+;+;+;+;+;+;+;+;+;+;+;+;+;+;+;+;+;+;+;+;+;+;+;+;+;+;+;+;+;+;+;+;+;+;+;+;+;+;+;+;+;+;+;+;+;+;+;+;+;+;+;+;+;+;+;+;+;+;+;+;+;+;+;+;+;+;+;+;+;+;+;+;+;+;+;+;+;+;+;+;+;+;+;+;+;+;+;+;+;+;+;+;+;+;+;+;+;+;+;+;+;+;+;+;+;+;+;+;+;+;+;+;+;+;+;+;+;+;+;+;+;+;+;+;+;+;+;+…	7460	13.07388157	11.39271496	17.48890583	254.5016009	194.4542593	212.7293849	2.53E-08	3.06E-06	-3.667442305	A0A093FZP7,Collagen alpha-1	-	PF02210,Laminin G domain;PF01391,Collagen triple helix repeat (20 copies);PF01410,ibrillar collagen C-terminal domain	IPR008160,Collagen triple helix repeat;IPR001791,Laminin G domain;IPR013320,Concanavalin A-like lectin/glucanase domain superfamily;IPR000885,Fibrillar collagen, C-terminal	-	GO:0005201,molecular_function,extracellular matrix structural constituent;GO:0005581,cellular_component,collagen trimer	-
da8aee8a-6531-41da-b575-e6e3c8f58080	NC_040075.1	45171308	45174350	-	3043	0.737810493	0.682596191	0.829920636	6.566648538	6.701586625	7.736159856	2.54E-08	3.06E-06	-2.905755031	A0A091WXK0,Tyrosine-protein kinase transmembrane receptor ROR2	-	PF01392,z domain;PF00051,Kringle domain;PF07714,Protein tyrosine kinase	IPR001245,Serine-threonine/tyrosine-protein kinase, catalytic domain;IPR000001,Kringle;IPR016247,Tyrosine-protein kinase, receptor ROR;IPR036790,Frizzled cysteine-rich domain superfamily;IPR038178,Kringle superfamily;IPR013806,Kringle-like fold;IPR011009,Protein kinase-like domain superfamily;IPR008266,Tyrosine-protein kinase, active site;IPR000719,Protein kinase domain;IPR018056,Kringle, conserv…	-	GO:0016301,molecular_function,kinase activity;GO:0007169,biological_process,transmembrane receptor protein tyrosine kinase signaling pathway;GO:0005524,molecular_function,ATP binding;GO:0004672,molecular_function,protein kinase activity;GO:0016020,cellular_component,membrane;GO:0006468,biological_process,protein phosphorylation;GO:0000166,molecular_function,nucleotide binding;GO:0016310,biologica…	-
LOC106018273	NC_040069.1;NC_040069.1;NC_040069.1;NC_040069.1;NC_040069.1;NC_040069.1;NC_040069.1;NC_040069.1;NC_040069.1;NC_040069.1;NC_040069.1;NC_040069.1;NC_040069.1;NC_040069.1	3335413;3335757;3336250;3336833;3337438;3337671;3337929;3338118;3338356;3338622;3338743;3338880;3339065;3340173	3335649;3335903;3336404;3336889;3337592;3337748;3338003;3338186;3338424;3338741;3338782;3338985;3339127;3340440	-;-;-;-;-;-;-;-;-;-;-;-;-;-	1639	625.6192737	457.3341451	511.01282	72.40364236	66.17139203	60.78017193	2.51E-08	3.06E-06	3.320296047	A0A1V4JC18,Transcription elongation factor A protein 3	-	-	IPR001222,Zinc finger, TFIIS-type;IPR035441,TFIIS/LEDGF domain superfamily;IPR017923,Transcription factor IIS, N-terminal;IPR036575,Transcription elongation factor S-II, central domain superfamily;IPR006289,Transcription elongation factor, TFIIS;IPR035100,Transcription elongation factor, IIS-type;IPR003618,Transcription elongation factor S-II, central domain;IPR003617,Transcription elongation fac…	-	GO:0003746,molecular_function,translation elongation factor activity;GO:0003676,molecular_function,nucleic acid binding;GO:0046872,molecular_function,metal ion binding;GO:0006355,biological_process,regulation of transcription, DNA-templated;GO:0006414,biological_process,translational elongation;GO:0005634,cellular_component,nucleus;GO:0008270,molecular_function,zinc ion binding;GO:0006351,biologi…	-
ZNF185	NC_040049.1;NC_040049.1;NC_040049.1;NC_040049.1;NC_040049.1;NC_040049.1;NC_040049.1;NC_040049.1;NC_040049.1;NC_040049.1;NC_040049.1;NC_040049.1;NC_040049.1;NC_040049.1;NC_040049.1;NC_040049.1;NC_040049.1;NC_040049.1;NC_040049.1;NC_040049.1;NC_040049.1;NC_040049.1;NC_040049.1;NC_040049.1;NC_040049.1;NC_040049.1;NC_040049.1;NC_040049.1;NC_040049.1;NC_040049.1;NC_040049.1;NC_040049.1;NC_040049.1;NC_…	10081581;10083370;10083665;10083666;10083667;10083668;10096873;10096873;10096873;10096873;10096873;10096873;10098493;10098493;10098493;10098493;10098493;10098493;10099210;10099210;10099210;10099210;10099210;10099210;10100826;10100826;10100826;10100826;10100826;10100826;10101484;10101484;10101484;10101484;10101484;10101484;10102343;10102343;10102343;10102343;10102343;10102343;10103054;10103054;101…	10081689;10083707;10083863;10083863;10083863;10083863;10096950;10096950;10096950;10096950;10096950;10096950;10098631;10098631;10098631;10098631;10098631;10098631;10099269;10099269;10099269;10099269;10099269;10099269;10100864;10100864;10100864;10100864;10100864;10100864;10101558;10101558;10101558;10101558;10101558;10101558;10102417;10102417;10102417;10102417;10102417;10102417;10103134;10103134;101…	+;+;+;+;+;+;+;+;+;+;+;+;+;+;+;+;+;+;+;+;+;+;+;+;+;+;+;+;+;+;+;+;+;+;+;+;+;+;+;+;+;+;+;+;+;+;+;+;+;+;+;+;+;+;+;+;+;+;+;+;+;+;+;+;+;+;+;+;+;+;+;+;+;+;+;+;+;+;+;+;+;+;+;+;+;+;+;+;+;+;+;+;+;+;+;+;+;+;+;+;+;+;+;+;+;+;+;+;+;+;+;+;+;+;+;+;+;+;+;+;+;+;+;+;+;+;+;+;+;+;+;+;+;+;+;+;+;+;+;+;+;+;+;+;+;+;+;+;+;+;+;+;+;+;+;+;+;+;+;+;+;+;+;+;+;+;+;+;+;+;+;+;+;+;+;+;+;+;+;+;+;+;+;+;+;+;+;+;+;+;+;+;+;+;+;+;+	5185	0.278887856	0.24036338	0.173363249	5.835618044	5.800411901	4.66399244	2.54E-08	3.06E-06	-4.23055549	A0A226P936,Uncharacterized protein	-	-	IPR030637,Zinc finger protein 185;IPR001781,Zinc finger, LIM-type	-	GO:0015629,cellular_component,actin cytoskeleton;GO:0051015,molecular_function,actin filament binding;GO:0046872,molecular_function,metal ion binding	-
LAMC2	NC_040053.1;NC_040053.1;NC_040053.1;NC_040053.1;NC_040053.1;NC_040053.1;NC_040053.1;NC_040053.1;NC_040053.1;NC_040053.1;NC_040053.1;NC_040053.1;NC_040053.1;NC_040053.1;NC_040053.1;NC_040053.1;NC_040053.1;NC_040053.1;NC_040053.1;NC_040053.1;NC_040053.1;NC_040053.1;NC_040053.1;NC_040053.1;NC_040053.1;NC_040053.1;NC_040053.1;NC_040053.1;NC_040053.1;NC_040053.1;NC_040053.1;NC_040053.1;NC_040053.1;NC_…	23696336;23696336;23698545;23698545;23698733;23698733;23699492;23699492;23700098;23700098;23702045;23702045;23702427;23702427;23703528;23703784;23703784;23704380;23704380;23704751;23704751;23705239;23705239;23706365;23706365;23707127;23707127;23707871;23707871;23708159;23708159;23708681;23708681;23709098;23709098;23709559;23709559;23709958;23709958;23710333;23710333;23710733;23710733;23711605;237…	23698335;23698335;23698644;23698644;23698891;23698891;23699691;23699691;23700212;23700212;23702194;23702194;23702498;23702571;23703600;23703921;23703921;23704459;23704459;23704956;23704956;23705392;23705392;23706501;23706501;23707360;23707360;23708050;23708050;23708377;23708377;23708793;23708793;23709287;23709287;23709681;23709681;23710094;23710094;23710431;23710431;23710862;23710862;23711793;237…	-;-;-;-;-;-;-;-;-;-;-;-;-;-;-;-;-;-;-;-;-;-;-;-;-;-;-;-;-;-;-;-;-;-;-;-;-;-;-;-;-;-;-;-;-;-;-	5500	0.041512924	0.025177457	0.046695504	1.61384891	1.895816873	1.618749217	2.62E-08	3.10E-06	-5.178355053	U3I441,Laminin subunit gamma 2	XP_005009894.1,laminin subunit gamma-2	PF00053,Laminin EGF domain;PF00052,Laminin B (Domain IV)	IPR031082,Laminin subunit gamma-2;IPR000034,Laminin IV;IPR002049,Laminin EGF domain;IPR000742,EGF-like domain	-	GO:0048731,biological_process,system development;GO:0070831,biological_process,basement membrane assembly;GO:0005604,cellular_component,basement membrane;GO:0008284,biological_process,positive regulation of cell proliferation;GO:0030335,biological_process,positive regulation of cell migration	K06246,ko04151,PI3K-Akt signaling pathway;K06246,ko04512,ECM-receptor interaction;K06246,ko05145,Toxoplasmosis;K06246,ko04510,Focal adhesion;K06246,ko05222,Small cell lung cancer;K06246,ko05200,Pathways in cancer;K06246,ko05146,Amoebiasis
LOC101805317	NC_040046.1;NC_040046.1	201523711;201524465	201524280;201524760	+;+	866	0.790950638	0.879466602	0.543702459	74.47382382	53.28085041	41.67867498	2.62E-08	3.10E-06	-5.927326712	A0A226MSE7,Uncharacterized protein	-	-	IPR002048,EF-hand domain;IPR018247,EF-Hand 1, calcium-binding site;IPR011992,EF-hand domain pair	-	GO:0005509,molecular_function,calcium ion binding	-
PNOC	NC_040048.1;NC_040048.1;NC_040048.1;NC_040048.1;NC_040048.1;NC_040048.1;NC_040048.1;NC_040048.1;NC_040048.1;NC_040048.1;NC_040048.1;NC_040048.1;NC_040048.1;NC_040048.1;NC_040048.1	116491823;116491823;116491824;116491845;116494885;116494885;116494885;116494934;116497924;116497924;116497924;116497924;116499438;116500161;116500161	116491953;116491953;116491953;116491953;116495074;116495074;116495074;116495074;116498997;116498338;116498338;116498338;116500622;116500622;116500622	+;+;+;+;+;+;+;+;+;+;+;+;+;+;+	2580	3.952845645	5.957688974	5.242686404	0.406743911	0.4398879	0.544048509	2.65E-08	3.11E-06	3.747922325	G1NMY3,Prepronociceptin	-	PF01160,Vertebrate endogenous opioids neuropeptide	IPR002367,Nociceptin;IPR006024,Opioid neuropeptide precursor	ENOG4111JDY,-;ENOG410IY0N,-	GO:0007218,biological_process,neuropeptide signaling pathway;GO:0007268,biological_process,chemical synaptic transmission	-
LOC113843753	NC_040046.1;NC_040046.1;NC_040046.1;NC_040046.1	179810543;179810543;179814352;179814355	179812345;179812345;179815270;179815270	+;+;+;+	2722	1.397998312	1.462595666	1.462451027	0.016063545	0.026058752	0.029466677	2.77E-08	3.18E-06	6.103782939	-	-	-	-	-	-	-
MAP7D2	NC_040046.1;NC_040046.1;NC_040046.1;NC_040046.1;NC_040046.1;NC_040046.1;NC_040046.1;NC_040046.1;NC_040046.1;NC_040046.1;NC_040046.1;NC_040046.1;NC_040046.1;NC_040046.1;NC_040046.1;NC_040046.1;NC_040046.1	79392229;79394457;79396338;79396494;79397263;79397974;79399271;79399502;79400979;79401491;79409370;79410569;79414935;79417768;79425501;79428825;79457867	79393845;79394736;79396491;79396523;79397341;79398027;79399375;79399706;79401105;79401723;79409497;79410693;79415045;79417882;79425664;79428902;79458146	-;-;-;-;-;-;-;-;-;-;-;-;-;-;-;-;-	3885	0.470159247	0.240595391	0.297481009	10.6808229	11.11905833	9.889259479	2.77E-08	3.18E-06	-4.651790057	A0A1V4JCZ8,MAP7 domain-containing protein 2 isoform D	-	-	IPR008604,Microtubule-associated protein 7 family	-	GO:0000226,biological_process,microtubule cytoskeleton organization;GO:0015630,cellular_component,microtubule cytoskeleton	-
NUDT3	NC_040072.1;NC_040072.1;NC_040072.1;NC_040072.1;NC_040072.1	5259356;5271297;5279073;5279878;5280864	5259570;5271407;5279117;5279962;5288480	+;+;+;+;+	8073	37.50201384	35.09499872	33.55196979	11.19528229	11.77805573	11.13258937	2.76E-08	3.18E-06	1.955237448	A0A091HWD0,Diphosphoinositol polyphosphate phosphohydrolase 1	-	PF00293,NUDIX domain	IPR015797,NUDIX hydrolase-like domain superfamily;IPR000086,NUDIX hydrolase domain;IPR020084,NUDIX hydrolase, conserved site	-	GO:0016787,molecular_function,hydrolase activity	-
LMOD3	NC_040058.1;NC_040058.1;NC_040058.1;NC_040058.1;NC_040058.1;NC_040058.1	5266987;5268736;5269834;5270295;5271291;5272583	5267461;5269724;5270243;5270557;5271575;5273112	+;+;+;+;+;+	2952	97.58302891	85.70314281	91.36495204	23.92135071	19.93158226	25.30962952	2.80E-08	3.19E-06	2.310305204	A0A218UWM5,Leiomodin-3	-	-	IPR003124,WH2 domain;IPR004934,Tropomodulin;IPR030131,Leiomodin-3;IPR032675,Leucine-rich repeat domain superfamily	-	GO:0003785,molecular_function,actin monomer binding;GO:0003779,molecular_function,actin binding;GO:0005523,molecular_function,tropomyosin binding;GO:0051694,biological_process,pointed-end actin filament capping	-
HSPB8	NC_040061.1;NC_040061.1;NC_040061.1;NC_040061.1;NC_040061.1;NC_040061.1;NC_040061.1	7837476;7837476;7839067;7839067;7840124;7840124;7840842	7838255;7838255;7839130;7839130;7840984;7840738;7841001	-;-;-;-;-;-;-	1722	40.08657055	49.13405607	51.3799685	17.34271476	16.62080794	17.6066988	2.88E-08	3.24E-06	1.756518849	A0A1V4JRD0,Heat shock protein beta-8	-	-	IPR001436,Alpha crystallin/Heat shock protein;IPR031107,Small heat shock protein HSP20;IPR008978,HSP20-like chaperone;IPR002068,Alpha crystallin/Hsp20 domain	-	-	-
SLN	NC_040046.1;NC_040046.1	16059485;16061391	16060131;16061524	-;-	781	30.50128015	68.44012984	43.9551573	0.839788165	0.590342516	0.872945587	2.86E-08	3.24E-06	6.254922303	U3J798,Uncharacterized protein	-	-	-	-	-	-
B4GALNT3	NC_040046.1;NC_040046.1;NC_040046.1;NC_040046.1;NC_040046.1;NC_040046.1;NC_040046.1;NC_040046.1;NC_040046.1;NC_040046.1;NC_040046.1;NC_040046.1;NC_040046.1;NC_040046.1;NC_040046.1;NC_040046.1;NC_040046.1;NC_040046.1;NC_040046.1;NC_040046.1;NC_040046.1;NC_040046.1;NC_040046.1;NC_040046.1;NC_040046.1;NC_040046.1;NC_040046.1;NC_040046.1;NC_040046.1;NC_040046.1;NC_040046.1;NC_040046.1;NC_040046.1;NC_…	139793594;139793594;139793594;139795923;139795923;139795923;139796562;139796562;139796562;139797182;139797182;139797182;139797182;139797966;139797966;139797966;139797966;139798369;139798369;139798369;139798369;139800194;139800194;139800194;139800194;139801653;139801653;139801653;139801653;139803048;139803048;139803048;139803048;139803490;139803490;139803490;139803490;139804012;139804012;139804012…	139794205;139794205;139794205;139796049;139796049;139796049;139796715;139796715;139796715;139797254;139797254;139797254;139797254;139798119;139798119;139798119;139798156;139798667;139798667;139798667;139798667;139801199;139801199;139801199;139801199;139801729;139801729;139801729;139801729;139803148;139803148;139803148;139803148;139803599;139803599;139803599;139803599;139804155;139804155;139804155…	-;-;-;-;-;-;-;-;-;-;-;-;-;-;-;-;-;-;-;-;-;-;-;-;-;-;-;-;-;-;-;-;-;-;-;-;-;-;-;-;-;-;-;-;-;-;-;-;-;-;-;-;-;-;-;-;-;-;-;-;-;-;-;-;-;-;-;-;-;-;-;-;-;-;-	3890	58.74327811	59.92024436	59.89288553	19.47953054	22.92067564	20.11393093	2.94E-08	3.25E-06	1.828138148	R0LNF4,Beta-1,4-N-acetylgalactosaminyltransferase	-	PF07691,PA14 domain;PF05679,Chondroitin N-acetylgalactosaminyltransferase	IPR008428,Chondroitin N-acetylgalactosaminyltransferase;IPR011658,PA14 domain;IPR037524,PA14/GLEYA domain;IPR029044,Nucleotide-diphospho-sugar transferases	-	GO:0033842,molecular_function,N-acetyl-beta-glucosaminyl-glycoprotein 4-beta-N-acetylgalactosaminyltransferase activity;GO:0005794,cellular_component,Golgi apparatus;GO:0032580,cellular_component,Golgi cisterna membrane;GO:0016740,molecular_function,transferase activity;GO:0008376,molecular_function,acetylgalactosaminyltransferase activity	-
COBL	NC_040047.1;NC_040047.1;NC_040047.1;NC_040047.1;NC_040047.1;NC_040047.1;NC_040047.1;NC_040047.1;NC_040047.1;NC_040047.1;NC_040047.1;NC_040047.1;NC_040047.1;NC_040047.1;NC_040047.1;NC_040047.1;NC_040047.1;NC_040047.1;NC_040047.1;NC_040047.1;NC_040047.1;NC_040047.1;NC_040047.1;NC_040047.1;NC_040047.1;NC_040047.1;NC_040047.1;NC_040047.1;NC_040047.1;NC_040047.1;NC_040047.1;NC_040047.1;NC_040047.1;NC_…	85008138;85008138;85008138;85008138;85008138;85008138;85008138;85008138;85008138;85008138;85008138;85014542;85014542;85014542;85014542;85014542;85014542;85014542;85014542;85014542;85014542;85014542;85016936;85016936;85016936;85016936;85016936;85016936;85016936;85016936;85016936;85016936;85016936;85017709;85017709;85017709;85017709;85017709;85017709;85017709;85017709;85017709;85017709;85017709;850…	85009476;85009476;85009476;85009476;85009476;85009476;85009476;85009476;85009476;85009476;85009476;85014796;85014796;85014796;85014796;85014796;85014796;85014796;85014796;85014796;85014796;85014796;85017055;85017055;85017055;85017055;85017055;85017055;85017055;85017055;85017055;85017055;85017055;85019726;85019726;85019726;85019726;85019726;85019726;85019726;85019726;85019726;85019726;85019726;850…	-;-;-;-;-;-;-;-;-;-;-;-;-;-;-;-;-;-;-;-;-;-;-;-;-;-;-;-;-;-;-;-;-;-;-;-;-;-;-;-;-;-;-;-;-;-;-;-;-;-;-;-;-;-;-;-;-;-;-;-;-;-;-;-;-;-;-;-;-;-;-;-;-;-;-;-;-;-;-;-;-;-;-;-;-;-;-;-;-;-;-;-;-;-;-;-;-;-;-;-;-;-;-;-;-;-;-;-;-;-;-;-;-;-;-;-;-;-;-;-;-;-;-;-;-;-;-;-;-;-;-;-;-;-;-;-;-;-;-;-;-;-;-;-;-;-;-;-;-;-;-;-;-;-;-;-;-;-;-;-;-;-	6442	17.76854552	18.20695186	17.33563933	5.233149988	4.409847174	4.152354273	2.97E-08	3.25E-06	2.262775272	R0JNS2,Protein cordon-bleu	-	PF02205,WH2 motif;PF09469,Cordon-bleu ubiquitin-like domain	IPR003124,WH2 domain;IPR019025,Cordon-bleu, ubiquitin-like domain;IPR003116,Raf-like Ras-binding	-	GO:0005057,molecular_function,signal transducer activity, downstream of receptor;GO:0003779,molecular_function,actin binding;GO:0007165,biological_process,signal transduction	-
MSX2	NC_040059.1;NC_040059.1	11297243;11302685	11299100;11303176	-;-	2350	0.259087755	0.235703854	0.218574698	9.284578834	5.795289096	8.276813371	2.95E-08	3.25E-06	-4.704374646	A0A226PMP2,Uncharacterized protein	-	-	IPR017970,Homeobox, conserved site;IPR001356,Homeobox domain;IPR020479,Homeobox domain, metazoa;IPR009057,Homeobox-like domain superfamily	-	GO:0006355,biological_process,regulation of transcription, DNA-templated;GO:0043565,molecular_function,sequence-specific DNA binding;GO:0003677,molecular_function,DNA binding;GO:0005634,cellular_component,nucleus	-
PRKAB2	NC_040053.1;NC_040053.1;NC_040053.1;NC_040053.1;NC_040053.1;NC_040053.1;NC_040053.1;NC_040053.1;NC_040053.1	27408999;27410906;27411250;27411374;27412143;27412794;27414102;27414457;27414926	27409141;27411083;27411372;27411417;27412236;27412914;27414235;27414525;27415753	+;+;+;+;+;+;+;+;+	1734	29.16558257	37.4540084	36.06514038	12.02814931	11.06521649	11.63344064	2.99E-08	3.25E-06	1.872797995	A0A091QRK4,5'-AMP-activated protein kinase subunit beta-2	XP_010177065.1,5'-AMP-activated protein kinase subunit beta-2 isoform X1	PF16561,lycogen recognition site of AMP-activated protein kinase;PF04739,5'-AMP-activated protein kinase beta subunit, interaction domain	IPR013783,Immunoglobulin-like fold;IPR032640,AMP-activated protein kinase, glycogen-binding domain;IPR006828,Association with the SNF1 complex (ASC) domain;IPR037256,ASC domain superfamily;IPR014756,Immunoglobulin E-set	-	GO:0016301,molecular_function,kinase activity;GO:0016310,biological_process,phosphorylation	-
RBBP8NL	NC_040066.1;NC_040066.1;NC_040066.1;NC_040066.1;NC_040066.1;NC_040066.1;NC_040066.1;NC_040066.1;NC_040066.1;NC_040066.1;NC_040066.1;NC_040066.1;NC_040066.1;NC_040066.1;NC_040066.1	12554885;12556938;12557396;12558910;12559356;12560705;12560768;12562128;12562373;12563768;12564155;12564585;12565232;12566287;12573397	12556007;12557064;12557457;12559018;12560178;12560765;12560867;12562210;12562539;12563840;12564267;12564680;12565274;12566445;12573611	-;-;-;-;-;-;-;-;-;-;-;-;-;-;-	3354	0.045382843	0.051608532	0.025524277	2.93324936	2.241736412	2.45120757	3.01E-08	3.25E-06	-5.578879844	U3J5R8,RBBP8 N-terminal like	-	PF10482,Tumour-suppressor protein CtIP N-terminal domain	IPR019518,DNA endonuclease Ctp1, N-terminal;IPR033316,DNA endonuclease RBBP8-like	-	-	-
bfb6862e-bb27-4eb8-a7e0-4b1d696ae690	NC_040075.1	39663547	39665513	-	1967	27.68407656	24.58706044	21.84820978	5.046043871	4.309285662	4.709739714	3.17E-08	3.39E-06	2.718454058	U3J3Q6,FERM domain containing 3	-	PF09379,RM N-terminal domain;PF00373,RM central domain;PF08736,RM adjacent (FA);PF09380,RM C-terminal PH-like domain	IPR019748,FERM central domain;IPR014847,FERM adjacent (FA);IPR035963,FERM superfamily, second domain;IPR018980,FERM, C-terminal PH-like domain;IPR000299,FERM domain;IPR019747,FERM conserved site;IPR011993,PH-like domain superfamily;IPR018979,FERM, N-terminal;IPR019749,Band 4.1 domain;IPR014352,FERM/acyl-CoA-binding protein superfamily;IPR000798,Ezrin/radixin/moesin-like;IPR029071,Ubiquitin-like d…	-	GO:0005856,cellular_component,cytoskeleton;GO:0008092,molecular_function,cytoskeletal protein binding;GO:0016021,cellular_component,integral component of membrane;GO:0016020,cellular_component,membrane	-
LOC101803381	NC_040050.1;NC_040050.1;NC_040050.1;NC_040050.1;NC_040050.1;NC_040050.1;NC_040050.1;NC_040050.1;NC_040050.1;NC_040050.1;NC_040050.1;NC_040050.1;NC_040050.1;NC_040050.1;NC_040050.1;NC_040050.1;NC_040050.1;NC_040050.1;NC_040050.1;NC_040050.1;NC_040050.1;NC_040050.1;NC_040050.1	34541659;34542665;34542873;34544330;34544766;34545043;34545205;34545429;34545778;34546065;34547255;34547924;34548148;34548441;34550456;34550678;34552358;34552643;34552878;34555246;34555465;34556785;34557312	34542569;34542802;34543335;34544626;34544968;34545133;34545351;34545692;34545984;34546154;34547524;34548054;34548352;34549060;34550594;34550762;34552554;34552740;34552956;34555388;34555638;34556827;34557820	+;+;+;+;+;+;+;+;+;+;+;+;+;+;+;+;+;+;+;+;+;+;+	5504	163.2208139	170.9690685	192.6578377	61.3452438	60.64138219	58.38563445	3.18E-08	3.39E-06	1.858191572	A0A1D5PYZ8,Spectrin beta chain	XP_015141773.1,spectrin beta chain, erythrocytic isoform X2	-	IPR001715,Calponin homology domain;IPR002017,Spectrin repeat;IPR018159,Spectrin/alpha-actinin;IPR036872,CH domain superfamily;IPR001849,Pleckstrin homology domain;IPR011993,PH-like domain superfamily;IPR001589,Actinin-type actin-binding domain, conserved site;IPR016343,Spectrin, beta subunit;IPR001605,Pleckstrin homology domain, spectrin-type	-	GO:0051693,biological_process,actin filament capping;GO:0005737,cellular_component,cytoplasm;GO:0007010,biological_process,cytoskeleton organization;GO:0008091,cellular_component,spectrin;GO:0005856,cellular_component,cytoskeleton;GO:0003779,molecular_function,actin binding;GO:0005543,molecular_function,phospholipid binding;GO:0005200,molecular_function,structural constituent of cytoskeleton	-
COL20A1	NC_040066.1;NC_040066.1;NC_040066.1;NC_040066.1;NC_040066.1;NC_040066.1;NC_040066.1;NC_040066.1;NC_040066.1;NC_040066.1;NC_040066.1;NC_040066.1;NC_040066.1;NC_040066.1;NC_040066.1;NC_040066.1;NC_040066.1;NC_040066.1;NC_040066.1;NC_040066.1;NC_040066.1;NC_040066.1;NC_040066.1;NC_040066.1;NC_040066.1;NC_040066.1;NC_040066.1;NC_040066.1;NC_040066.1;NC_040066.1;NC_040066.1;NC_040066.1;NC_040066.1;NC_…	13539017;13539017;13543014;13543014;13545433;13545433;13547154;13547154;13547507;13547507;13547860;13547860;13549183;13549183;13550000;13550000;13550259;13550259;13551437;13551437;13552096;13553051;13553702;13553702;13556123;13556123;13556477;13556477;13556785;13556785;13557422;13557422;13558644;13558644;13562148;13562148;13562937;13562937;13563355;13563355;13566283;13566283;13567987;13567987;135…	13539638;13539638;13543098;13543098;13545543;13545543;13547297;13547297;13547665;13547665;13548060;13548060;13549338;13549338;13550119;13550119;13550423;13550423;13551598;13551598;13552268;13553180;13553847;13553847;13556246;13556246;13556616;13556616;13556914;13556914;13557564;13557564;13558776;13558776;13562290;13562290;13563066;13563066;13563411;13563411;13566321;13566321;13568125;13568125;135…	+;+;+;+;+;+;+;+;+;+;+;+;+;+;+;+;+;+;+;+;+;+;+;+;+;+;+;+;+;+;+;+;+;+;+;+;+;+;+;+;+;+;+;+;+;+;+;+;+;+;+;+;+;+;+;+;+;+;+;+;+;+;+;+;+;+;+;+;+;+;+;+;+;+;+;+;+;+	5427	455.3800288	372.9373137	524.5586351	63.44834022	76.46061441	66.14560939	3.21E-08	3.40E-06	3.031955924	R0M481,Collagen alpha-1	-	PF00092,von Willebrand factor type A domain;PF00041,ibronectin type III domain;PF01391,Collagen triple helix repeat (20 copies)	IPR008160,Collagen triple helix repeat;IPR003961,Fibronectin type III;IPR036465,von Willebrand factor A-like domain superfamily;IPR036116,Fibronectin type III superfamily;IPR001791,Laminin G domain;IPR013320,Concanavalin A-like lectin/glucanase domain superfamily;IPR013783,Immunoglobulin-like fold;IPR002035,von Willebrand factor, type A	-	GO:0005581,cellular_component,collagen trimer	-
ASB5	NC_040049.1;NC_040049.1;NC_040049.1;NC_040049.1;NC_040049.1;NC_040049.1;NC_040049.1;NC_040049.1;NC_040049.1;NC_040049.1;NC_040049.1;NC_040049.1;NC_040049.1;NC_040049.1;NC_040049.1;NC_040049.1;NC_040049.1;NC_040049.1;NC_040049.1;NC_040049.1;NC_040049.1;NC_040049.1;NC_040049.1;NC_040049.1;NC_040049.1;NC_040049.1;NC_040049.1;NC_040049.1;NC_040049.1;NC_040049.1;NC_040049.1	23583143;23585442;23585597;23596965;23597200;23601426;23601426;23604532;23604532;23604532;23604532;23605738;23605738;23605738;23605738;23607389;23607389;23607389;23607389;23607677;23607677;23607677;23607677;23609613;23609613;23609613;23609613;23610069;23610069;23610069;23610069	23583328;23585734;23585734;23597300;23597300;23601493;23601493;23604611;23604611;23604611;23604611;23605845;23605845;23605845;23605845;23607539;23607539;23607539;23607539;23607811;23607811;23607811;23607811;23609804;23609804;23609804;23609804;23610687;23610687;23610687;23610687	+;+;+;+;+;+;+;+;+;+;+;+;+;+;+;+;+;+;+;+;+;+;+;+;+;+;+;+;+;+;+	2168	19.9745844	21.31751369	18.83543267	5.949661571	5.889181868	5.308989974	3.37E-08	3.48E-06	2.122613505	R0L5C9,Ankyrin repeat and SOCS box containing 5	XP_012962677.1,ankyrin repeat and SOCS box protein 5 isoform X1	PF12796,Ankyrin repeats (3 copies);PF07525,SOCS box;PF13637,Ankyrin repeats (many copies)	IPR001496,SOCS box domain;IPR002110,Ankyrin repeat;IPR036036,SOCS box-like domain superfamily;IPR037328,Ankyrin repeat and SOCS box protein 5, SOCS box domain;IPR036770,Ankyrin repeat-containing domain superfamily;IPR020683,Ankyrin repeat-containing domain	-	GO:0016020,cellular_component,membrane;GO:0005622,cellular_component,intracellular;GO:0016021,cellular_component,integral component of membrane;GO:0035556,biological_process,intracellular signal transduction	-
KIF24	NC_040075.1;NC_040075.1;NC_040075.1;NC_040075.1;NC_040075.1;NC_040075.1;NC_040075.1;NC_040075.1;NC_040075.1;NC_040075.1;NC_040075.1;NC_040075.1;NC_040075.1;NC_040075.1;NC_040075.1;NC_040075.1;NC_040075.1;NC_040075.1;NC_040075.1;NC_040075.1;NC_040075.1	8398052;8403325;8405021;8405051;8405399;8406167;8406877;8408288;8409261;8411963;8413755;8415800;8417344;8419684;8419769;8421639;8425421;8427372;8430610;8431979;8432505	8401059;8403418;8405048;8405397;8406165;8406839;8407404;8408397;8409332;8412068;8413876;8415887;8417559;8419766;8419783;8421828;8426051;8427553;8430703;8432050;8432723	-;-;-;-;-;-;-;-;-;-;-;-;-;-;-;-;-;-;-;-;-	7645	35.98782296	34.33824768	34.7584757	13.20042274	13.40237593	12.93089902	3.34E-08	3.48E-06	1.726399797	U3II88,Kinesin family member 24	-	PF00225,Kinesin motor domain	IPR019821,Kinesin motor domain, conserved site;IPR013761,Sterile alpha motif/pointed domain superfamily;IPR027417,P-loop containing nucleoside triphosphate hydrolase;IPR001752,Kinesin motor domain;IPR036961,Kinesin motor domain superfamily;IPR027640,Kinesin-like protein	-	GO:0000166,molecular_function,nucleotide binding;GO:0005814,cellular_component,centriole;GO:0003774,molecular_function,motor activity;GO:0005524,molecular_function,ATP binding;GO:0007019,biological_process,microtubule depolymerization;GO:0060271,biological_process,cilium assembly;GO:0008017,molecular_function,microtubule binding;GO:0007018,biological_process,microtubule-based movement;GO:0042802,…	-
LOC106015647	NC_040048.1;NC_040048.1;NC_040048.1;NC_040048.1;NC_040048.1;NC_040048.1;NC_040048.1;NC_040048.1;NC_040048.1;NC_040048.1;NC_040048.1;NC_040048.1;NC_040048.1;NC_040048.1;NC_040048.1;NC_040048.1;NC_040048.1;NC_040048.1;NC_040048.1;NC_040048.1;NC_040048.1;NC_040048.1;NC_040048.1;NC_040048.1;NC_040048.1;NC_040048.1;NC_040048.1;NC_040048.1;NC_040048.1;NC_040048.1;NC_040048.1;NC_040048.1;NC_040048.1;NC_…	38851604;38851614;38856158;38857560;38857560;38857560;38859591;38859591;38859591;38859591;38859591;38866531;38866531;38866531;38866531;38866531;38866531;38866531;38866531;38866531;38866531;38866531;38866531;38866531;38866531;38866531;38866531;38866531;38866531;38866531;38866531;38866531;38866531;38866531;38866531;38866531;38866531;38871127;38871131;38871131;38885387;38885388;38887947;38887947;388…	38854239;38854239;38857913;38857913;38857913;38857913;38859771;38859771;38859771;38859771;38859771;38871279;38871279;38871279;38870524;38871279;38871279;38871279;38871279;38871279;38871279;38871279;38871279;38871279;38871279;38871279;38871279;38871279;38871279;38871279;38871279;38871279;38871279;38871279;38871279;38870524;38871279;38871279;38871279;38871279;38885728;38885728;38888018;38888018;388…	-;-;-;-;-;-;-;-;-;-;-;-;-;-;-;-;-;-;-;-;-;-;-;-;-;-;-;-;-;-;-;-;-;-;-;-;-;-;-;-;-;-;-;-;-;-;-;-;-;-;-;-;-;-;-;-;-;-;-;-;-;-;-;-;-;-;-;-;-;-;-;-;-;-;-;-;-;-;-;-;-;-;-;-;-;-;-;-;-;-;-;-;-;-;-;-;-;-;-;-;-;-;-;-;-;-;-;-;-;-;-;-;-;-;-;-;-;-;-;-;-;-;-;-;-;-;-;-;-;-;-;-;-;-;-;-;-;-;-;-;-;-;-;-;-;-;-;-;-;-;-;-;-;-;-;-;-;-;-;-;-;-;-;-;-;-;-;-;-;-;-;-;-;-;-;-;-;-;-;-;-;-;-;-;-;-;-;-;-;-;-;-;-;-;-;-;-;-;-;-…	21004	1.49467478	2.027298339	2.22335722	0.395531536	0.366411814	0.421968032	3.38E-08	3.48E-06	2.586226778	-	-	-	-	-	-	-
LRRC3C	NC_040073.1;NC_040073.1	3579350;3582477	3579410;3584895	+;+	2480	3.974137153	4.257579059	4.038784499	0.546562131	0.414722942	0.501301841	3.38E-08	3.48E-06	3.382559992	U3I2U3,Leucine rich repeat containing 3C	XP_005031065.1,-	PF13855,Leucine rich repeat	IPR001611,Leucine-rich repeat;IPR003591,Leucine-rich repeat, typical subtype;IPR032675,Leucine-rich repeat domain superfamily	-	GO:0016021,cellular_component,integral component of membrane;GO:0016020,cellular_component,membrane	-
KCNT2	NC_040053.1;NC_040053.1;NC_040053.1;NC_040053.1;NC_040053.1;NC_040053.1;NC_040053.1;NC_040053.1;NC_040053.1;NC_040053.1;NC_040053.1;NC_040053.1;NC_040053.1;NC_040053.1;NC_040053.1;NC_040053.1;NC_040053.1;NC_040053.1;NC_040053.1;NC_040053.1;NC_040053.1;NC_040053.1;NC_040053.1;NC_040053.1;NC_040053.1;NC_040053.1;NC_040053.1;NC_040053.1;NC_040053.1;NC_040053.1;NC_040053.1;NC_040053.1;NC_040053.1;NC_…	29193775;29193775;29193775;29193775;29193775;29193775;29193775;29193775;29193775;29203390;29203390;29203390;29203390;29203390;29203390;29203390;29203390;29203390;29204077;29206612;29206612;29206612;29206612;29206612;29206612;29206612;29206612;29206612;29206612;29208292;29208292;29208292;29208292;29208292;29208292;29208292;29208292;29210762;29210762;29210762;29210762;29210762;29210762;29210762;292…	29201095;29201095;29201095;29201095;29201095;29201095;29201095;29201095;29201095;29203474;29203474;29203474;29203474;29203474;29203474;29203474;29203474;29203474;29205191;29206912;29206912;29206912;29206912;29206912;29206912;29206912;29206912;29206912;29206912;29208312;29208312;29208312;29208312;29208312;29208312;29208312;29208312;29210890;29210890;29210890;29210890;29210890;29210890;29210890;292…	-;-;-;-;-;-;-;-;-;-;-;-;-;-;-;-;-;-;-;-;-;-;-;-;-;-;-;-;-;-;-;-;-;-;-;-;-;-;-;-;-;-;-;-;-;-;-;-;-;-;-;-;-;-;-;-;-;-;-;-;-;-;-;-;-;-;-;-;-;-;-;-;-;-;-;-;-;-;-;-;-;-;-;-;-;-;-;-;-;-;-;-;-;-;-;-;-;-;-;-;-;-;-;-;-;-;-;-;-;-;-;-;-;-;-;-;-;-;-;-;-;-;-;-;-;-;-;-;-;-;-;-;-;-;-;-;-;-;-;-;-;-;-;-;-;-;-;-;-;-;-;-;-;-;-;-;-;-;-;-;-;-;-;-;-;-;-;-;-;-;-;-;-;-;-;-;-;-;-;-;-;-;-;-;-;-;-;-;-;-;-;-;-;-;-;-;-;-;-;-…	12056	4.974480602	5.817692526	5.343425575	1.817038006	1.823896515	1.583408601	3.46E-08	3.53E-06	1.936042624	A0A218UUC0,Potassium channel subfamily T member 2	-	-	IPR003929,Potassium channel, BK, alpha subunit;IPR036291,NAD(P)-binding domain superfamily;IPR013099,Potassium channel domain	-	GO:0006813,biological_process,potassium ion transport;GO:0016021,cellular_component,integral component of membrane;GO:0016020,cellular_component,membrane	-
LOC113843742	NC_040050.1;NC_040050.1;NC_040050.1;NC_040050.1;NC_040050.1;NC_040050.1;NC_040050.1;NC_040050.1;NC_040050.1;NC_040050.1;NC_040050.1;NC_040050.1;NC_040050.1;NC_040050.1	34443549;34444039;34444365;34444742;34445416;34445607;34445862;34446119;34446314;34446473;34446942;34447062;34447267;34447509	34443620;34444233;34444667;34444900;34445533;34445794;34445974;34446234;34446394;34446658;34447022;34447123;34447418;34447787	-;-;-;-;-;-;-;-;-;-;-;-;-;-	2105	100.7830598	92.87102744	103.7265009	36.01857424	35.34802285	34.90299182	3.48E-08	3.53E-06	1.800545861	U3J802,Spectrin beta, erythrocytic	-	PF00435,Spectrin repeat;PF00307,Calponin homology (CH) domain;PF15410,Pleckstrin homology domain	IPR001715,Calponin homology domain;IPR002017,Spectrin repeat;IPR018159,Spectrin/alpha-actinin;IPR036872,CH domain superfamily;IPR001849,Pleckstrin homology domain;IPR011993,PH-like domain superfamily;IPR001589,Actinin-type actin-binding domain, conserved site;IPR001605,Pleckstrin homology domain, spectrin-type	-	GO:0005794,cellular_component,Golgi apparatus;GO:0032991,cellular_component,protein-containing complex;GO:0030506,molecular_function,ankyrin binding;GO:0003779,molecular_function,actin binding;GO:0005829,cellular_component,cytosol;GO:0051015,molecular_function,actin filament binding;GO:0014731,cellular_component,spectrin-associated cytoskeleton;GO:0005543,molecular_function,phospholipid binding	-
CACNA2D1	NC_040046.1;NC_040046.1;NC_040046.1;NC_040046.1;NC_040046.1;NC_040046.1;NC_040046.1;NC_040046.1;NC_040046.1;NC_040046.1;NC_040046.1;NC_040046.1;NC_040046.1;NC_040046.1;NC_040046.1;NC_040046.1;NC_040046.1;NC_040046.1;NC_040046.1;NC_040046.1;NC_040046.1;NC_040046.1;NC_040046.1;NC_040046.1;NC_040046.1;NC_040046.1;NC_040046.1;NC_040046.1;NC_040046.1;NC_040046.1;NC_040046.1;NC_040046.1;NC_040046.1;NC_…	192563882;192563882;192563882;192574244;192574245;192574246;192574247;192574247;192576078;192576078;192576078;192576078;192576078;192576078;192576078;192576078;192578876;192578876;192578876;192578876;192578876;192578876;192578876;192578876;192580015;192580015;192580015;192580015;192580015;192580015;192580015;192580015;192580289;192580289;192580289;192580289;192580289;192580289;192580289;192580289…	192568573;192568573;192568573;192575060;192575060;192575060;192575060;192575060;192576160;192576160;192576160;192576160;192576160;192576160;192576160;192576160;192578988;192578988;192578988;192578988;192578988;192578988;192578988;192578988;192580144;192580144;192580144;192580144;192580144;192580144;192580144;192580144;192580344;192580344;192580344;192580344;192580344;192580344;192580344;192580344…	-;-;-;-;-;-;-;-;-;-;-;-;-;-;-;-;-;-;-;-;-;-;-;-;-;-;-;-;-;-;-;-;-;-;-;-;-;-;-;-;-;-;-;-;-;-;-;-;-;-;-;-;-;-;-;-;-;-;-;-;-;-;-;-;-;-;-;-;-;-;-;-;-;-;-;-;-;-;-;-;-;-;-;-;-;-;-;-;-;-;-;-;-;-;-;-;-;-;-;-;-;-;-;-;-;-;-;-;-;-;-;-;-;-;-;-;-;-;-;-;-;-;-;-;-;-;-;-;-;-;-;-;-;-;-;-;-;-;-;-;-;-;-;-;-;-;-;-;-;-;-;-;-;-;-;-;-;-;-;-;-;-;-;-;-;-;-;-;-;-;-;-;-;-;-;-;-;-;-;-;-;-;-;-;-;-;-;-;-;-;-;-;-;-;-;-;-;-;-;-…	9780	11.94911469	14.11662433	11.60265495	4.278609073	4.210223086	3.862792098	3.62E-08	3.56E-06	1.919221667	A0A0Q3X9V2,Voltage-dependent calcium channel subunit alpha-2/delta-1 isoform X1	-	PF08473,Neuronal voltage-dependent calcium channel alpha 2acd;PF00092,von Willebrand factor type A domain;PF08399,VWA N-terminal	IPR002035,von Willebrand factor, type A;IPR036465,von Willebrand factor A-like domain superfamily;IPR013608,VWA N-terminal;IPR013680,Voltage-dependent calcium channel, alpha-2/delta subunit, conserved region	-	-	-
GJA1	NC_040048.1;NC_040048.1	65129080;65138097	65132152;65138342	-;-	3319	16.86553756	17.71107802	18.08120064	88.18769276	81.47874649	74.58960562	3.57E-08	3.56E-06	-1.902793229	A0A226P471,Gap junction protein	-	-	IPR017990,Connexin, conserved site;IPR013124,Gap junction alpha-1 protein (Cx43), C-terminal;IPR035091,Gap junction alpha-1 protein (Cx43), alpha helix domain superfamily;IPR013092,Connexin, N-terminal;IPR002261,Gap junction alpha-1 protein (Cx43);IPR019570,Gap junction protein, cysteine-rich domain;IPR038359,Connexin, N-terminal domain superfamily;IPR000500,Connexin;IPR034634,Connexin, C-terminal	-	GO:0007267,biological_process,cell-cell signaling;GO:0007507,biological_process,heart development;GO:0005921,cellular_component,gap junction;GO:0005922,cellular_component,connexin complex;GO:0055085,biological_process,transmembrane transport;GO:0030054,cellular_component,cell junction;GO:0007154,biological_process,cell communication;GO:0022857,molecular_function,transmembrane transporter activity…	-
LDHD	NC_040056.1;NC_040056.1;NC_040056.1;NC_040056.1;NC_040056.1;NC_040056.1;NC_040056.1	17496537;17496757;17497055;17497574;17497777;17497940;17498131	17496685;17496956;17497183;17497701;17497867;17498051;17498436	+;+;+;+;+;+;+	1115	12.69588092	11.89155008	11.40166	1.294102265	1.71763403	1.510649493	3.58E-08	3.56E-06	3.302182894	F1P277,Lactate dehydrogenase D	XP_015134715.1,probable D-lactate dehydrogenase, mitochondrial isoform X2	PF02913,AD linked oxidases, C-terminal domain;PF01565,AD binding domain	IPR016171,Vanillyl-alcohol oxidase, C-terminal subdomain 2;IPR006094,FAD linked oxidase, N-terminal;IPR016166,FAD-binding, type 2;IPR036318,FAD-binding, type 2-like superfamily;IPR016164,FAD-linked oxidase-like, C-terminal;IPR004113,FAD-linked oxidase, C-terminal	-	GO:0016614,molecular_function,oxidoreductase activity, acting on CH-OH group of donors;GO:0003824,molecular_function,catalytic activity;GO:0050660,molecular_function,flavin adenine dinucleotide binding;GO:0016491,molecular_function,oxidoreductase activity;GO:0005739,cellular_component,mitochondrion;GO:0055114,biological_process,oxidation-reduction process	-
LOC113839637	NW_020866752.1;NW_020866752.1;NW_020866752.1;NW_020866752.1;NW_020866752.1;NW_020866752.1;NW_020866752.1;NW_020866752.1;NW_020866752.1;NW_020866752.1;NW_020866752.1;NW_020866752.1;NW_020866752.1;NW_020866752.1;NW_020866752.1;NW_020866752.1;NW_020866752.1;NW_020866752.1;NW_020866752.1;NW_020866752.1	575;844;1865;2350;2612;2857;3028;3564;4832;5349;5960;6230;6568;6850;7325;7807;8027;8284;8529;9226	741;1099;2107;2526;2757;2947;3417;3690;4950;5545;6143;6395;6692;7158;7528;7932;8197;8388;8624;9519	+;+;+;+;+;+;+;+;+;+;+;+;+;+;+;+;+;+;+;+	3693	386.3158124	329.6914035	288.1895266	56.70156608	64.20942902	67.0357165	3.62E-08	3.56E-06	2.741585343	A0A091I1V9,Myosin heavy chain, skeletal muscle, adult	-	PF01576,Myosin tail;PF00063,Myosin head (motor domain);PF02736,Myosin N-terminal SH3-like domain	IPR002928,Myosin tail;IPR001609,Myosin head, motor domain;IPR027417,P-loop containing nucleoside triphosphate hydrolase;IPR004009,Myosin, N-terminal, SH3-like;IPR000048,IQ motif, EF-hand binding site;IPR036961,Kinesin motor domain superfamily;IPR008989,Myosin S1 fragment, N-terminal;IPR027401,Myosin IQ motif-containing domain superfamily	-	GO:0003777,molecular_function,microtubule motor activity;GO:0003774,molecular_function,motor activity;GO:0005524,molecular_function,ATP binding;GO:0003779,molecular_function,actin binding;GO:0008017,molecular_function,microtubule binding;GO:0051015,molecular_function,actin filament binding;GO:0016459,cellular_component,myosin complex;GO:0000166,molecular_function,nucleotide binding;GO:0007018,bio…	-
LOC113842422	NC_040046.1;NC_040046.1	121548873;121554127	121552898;121554175	-;-	4075	9.291594228	11.02710835	9.936879594	3.444347366	3.089672756	3.159124238	3.56E-08	3.56E-06	1.953075341	-	-	-	-	-	-	-
LOC101801336	NC_040051.1;NC_040051.1;NC_040051.1;NC_040051.1;NC_040051.1;NC_040051.1;NC_040051.1;NC_040051.1;NC_040051.1;NC_040051.1;NC_040051.1;NC_040051.1;NC_040051.1;NC_040051.1	7515615;7516874;7518094;7518481;7520004;7520865;7521078;7521754;7523498;7525091;7526756;7527726;7529518;7533501	7515777;7517041;7518205;7518610;7520122;7520987;7521194;7521862;7523632;7525216;7526910;7527774;7529614;7533757	-;-;-;-;-;-;-;-;-;-;-;-;-;-	1860	0.020458879	0.055837102	0.046026034	3.009030225	3.031767712	3.277328163	3.67E-08	3.58E-06	-5.853489721	U3ILD2,Triacylglycerol lipase	-	PF12697,Alpha/beta hydrolase family;PF00151,Lipase	IPR000734,Triacylglycerol lipase family;IPR016272,Lipase, LIPH-type;IPR033906,Lipase, N-terminal;IPR036392,PLAT/LH2 domain superfamily;IPR013818,Lipase/vitellogenin;IPR029058,Alpha/Beta hydrolase fold;IPR002331,Pancreatic lipase	-	GO:0052689,molecular_function,carboxylic ester hydrolase activity;GO:0006629,biological_process,lipid metabolic process;GO:0004806,molecular_function,triglyceride lipase activity;GO:0016042,biological_process,lipid catabolic process;GO:0005576,cellular_component,extracellular region	-
GATA3	NC_040046.1;NC_040046.1;NC_040046.1;NC_040046.1;NC_040046.1;NC_040046.1;NC_040046.1;NC_040046.1;NC_040046.1;NC_040046.1;NC_040046.1;NC_040046.1;NC_040046.1;NC_040046.1;NC_040046.1;NC_040046.1;NC_040046.1	198554997;198554997;198554997;198562558;198562558;198562558;198567805;198567805;198567805;198570733;198570733;198570733;198573885;198573885;198573885;198575133;198583443	198556336;198556336;198556336;198562683;198562683;198562683;198567950;198567950;198567947;198571269;198571269;198571269;198574505;198574505;198574505;198575299;198583578	-;-;-;-;-;-;-;-;-;-;-;-;-;-;-;-;-	3073	0.544859947	0.529480366	0.626810781	18.8246456	12.82222053	11.47137828	3.79E-08	3.62E-06	-4.357653576	A0A091EXZ5,GATA-binding factor 3	XP_017595884.1,-;XP_017595883.1,-;XP_008636606.1,-	PF00320,ATA zinc finger	IPR016374,Transcription factor, GATA-2/3;IPR029521,Transcription factor GATA-3;IPR000679,Zinc finger, GATA-type;IPR013088,Zinc finger, NHR/GATA-type	-	GO:0043565,molecular_function,sequence-specific DNA binding;GO:0045582,biological_process,positive regulation of T cell differentiation;GO:0003700,molecular_function,DNA binding transcription factor activity;GO:0046872,molecular_function,metal ion binding;GO:0006355,biological_process,regulation of transcription, DNA-templated;GO:0000976,molecular_function,transcription regulatory region sequence…	-
SPATA7	NC_040050.1;NC_040050.1;NC_040050.1;NC_040050.1;NC_040050.1;NC_040050.1;NC_040050.1;NC_040050.1;NC_040050.1;NC_040050.1;NC_040050.1;NC_040050.1;NC_040050.1;NC_040050.1;NC_040050.1;NC_040050.1;NC_040050.1;NC_040050.1;NC_040050.1;NC_040050.1;NC_040050.1;NC_040050.1;NC_040050.1;NC_040050.1;NC_040050.1;NC_040050.1;NC_040050.1;NC_040050.1;NC_040050.1;NC_040050.1;NC_040050.1;NC_040050.1;NC_040050.1;NC_…	22475192;22475192;22475192;22475192;22475192;22475192;22479325;22479325;22479325;22479325;22479325;22479325;22480555;22480555;22480555;22480555;22480555;22480555;22481997;22481997;22481997;22481997;22481997;22481997;22482654;22482654;22482654;22482654;22482654;22482654;22483981;22483981;22483981;22483981;22483981;22483981;22484212;22484212;22484212;22484212;22484212;22484212;22487537;22487537;224…	22479003;22479003;22479003;22479003;22479003;22479003;22479382;22479382;22479382;22479382;22479382;22479382;22480632;22480632;22480632;22480632;22480632;22480632;22482050;22482050;22482050;22482050;22482050;22482050;22482724;22482724;22482724;22482724;22482724;22482724;22484047;22484047;22484047;22484047;22484047;22484047;22484690;22484690;22484690;22484690;22484690;22484690;22487582;22487582;224…	-;-;-;-;-;-;-;-;-;-;-;-;-;-;-;-;-;-;-;-;-;-;-;-;-;-;-;-;-;-;-;-;-;-;-;-;-;-;-;-;-;-;-;-;-;-;-;-;-;-;-;-;-;-;-;-;-;-;-;-;-;-;-;-;-;-;-;-;-;-;-;-;-;-;-;-;-	5261	4.520708284	4.974713295	5.255943891	1.421206985	1.48982657	1.433107714	3.78E-08	3.62E-06	2.074437803	F1NJT8,Spermatogenesis associated 7	XP_421307.3,spermatogenesis-associated protein 7 isoform X1	PF15244,Spermatogenesis-associated protein 7, or HSD3	IPR029357,Spermatogenesis-associated protein 7	-	GO:0005930,cellular_component,axoneme;GO:1903546,biological_process,protein localization to photoreceptor outer segment;GO:0045494,biological_process,photoreceptor cell maintenance;GO:0032391,cellular_component,photoreceptor connecting cilium;GO:0015630,cellular_component,microtubule cytoskeleton;GO:0005739,cellular_component,mitochondrion;GO:0036064,cellular_component,ciliary basal body;GO:00058…	-
THBS1	NC_040050.1;NC_040050.1;NC_040050.1;NC_040050.1;NC_040050.1;NC_040050.1;NC_040050.1;NC_040050.1;NC_040050.1;NC_040050.1;NC_040050.1;NC_040050.1;NC_040050.1;NC_040050.1;NC_040050.1;NC_040050.1;NC_040050.1;NC_040050.1;NC_040050.1;NC_040050.1;NC_040050.1;NC_040050.1	42839676;42842665;42842912;42843425;42843832;42844406;42845907;42846354;42846922;42847522;42848224;42848477;42848780;42849276;42849837;42850992;42852582;42852885;42853336;42853951;42854759;42854940	42841994;42842804;42843009;42843696;42844059;42844640;42846025;42846513;42847029;42847740;42848376;42848604;42848953;42849452;42850010;42851085;42852707;42853081;42853411;42854528;42854844;42855102	-;-;-;-;-;-;-;-;-;-;-;-;-;-;-;-;-;-;-;-;-;-	6024	4.996734663	3.764184477	4.824711122	34.65915238	31.28587676	36.82870894	3.76E-08	3.62E-06	-2.598152612	A0A1V4KF81,Thrombospondin-1	-	-	IPR028499,Thrombospondin-1;IPR008859,Thrombospondin, C-terminal;IPR000884,Thrombospondin type-1 (TSP1) repeat;IPR028974,TSP type-3 repeat;IPR003367,Thrombospondin, type 3-like repeat;IPR001791,Laminin G domain;IPR017897,Thrombospondin, type 3 repeat;IPR001881,EGF-like calcium-binding domain;IPR013320,Concanavalin A-like lectin/glucanase domain superfamily;IPR037349,Thrombospondin;IPR000742,EGF-li…	-	GO:0016525,biological_process,negative regulation of angiogenesis;GO:0050840,molecular_function,extracellular matrix binding;GO:0031012,cellular_component,extracellular matrix;GO:0005509,molecular_function,calcium ion binding;GO:0030198,biological_process,extracellular matrix organization;GO:0006954,biological_process,inflammatory response;GO:0008201,molecular_function,heparin binding;GO:0016020,…	-
ABCC8	NC_040050.1;NC_040050.1;NC_040050.1;NC_040050.1;NC_040050.1;NC_040050.1;NC_040050.1;NC_040050.1;NC_040050.1;NC_040050.1;NC_040050.1;NC_040050.1;NC_040050.1;NC_040050.1;NC_040050.1;NC_040050.1;NC_040050.1;NC_040050.1;NC_040050.1;NC_040050.1;NC_040050.1;NC_040050.1;NC_040050.1;NC_040050.1;NC_040050.1;NC_040050.1;NC_040050.1;NC_040050.1;NC_040050.1;NC_040050.1;NC_040050.1;NC_040050.1;NC_040050.1;NC_…	64275919;64276669;64279113;64283916;64286084;64287153;64292636;64294396;64299235;64300854;64306274;64306623;64311135;64311459;64313266;64313429;64317288;64318463;64321371;64322333;64323620;64325523;64328063;64328888;64329610;64330847;64332142;64332801;64334203;64337755;64339059;64339797;64340073;64340927;64341768	64276205;64276810;64279234;64284082;64286326;64287341;64292800;64294551;64299369;64301016;64306314;64306768;64311240;64311569;64313339;64313536;64317323;64318498;64321469;64322417;64323700;64325660;64328188;64328987;64329857;64331007;64332211;64332958;64334295;64337857;64339172;64339917;64340203;64341005;64342574	+;+;+;+;+;+;+;+;+;+;+;+;+;+;+;+;+;+;+;+;+;+;+;+;+;+;+;+;+;+;+;+;+;+;+	5141	17.8313393	20.90203985	19.49127792	4.422677425	4.670386348	3.401168684	3.86E-08	3.66E-06	2.5267333	A0A1V4JNS8,ATP-binding cassette sub-family C member 8	-	-	IPR003439,ABC transporter-like;IPR027417,P-loop containing nucleoside triphosphate hydrolase;IPR011527,ABC transporter type 1, transmembrane domain;IPR036640,ABC transporter type 1, transmembrane domain superfamily;IPR000844,ATP-binding cassette subfamily C member 8;IPR003593,AAA+ ATPase domain;IPR017871,ABC transporter, conserved site;IPR000388,Sulphonylurea receptor	-	GO:0042626,molecular_function,ATPase activity, coupled to transmembrane movement of substances;GO:0006813,biological_process,potassium ion transport;GO:0055085,biological_process,transmembrane transport;GO:0016887,molecular_function,ATPase activity;GO:0007165,biological_process,signal transduction;GO:0016020,cellular_component,membrane;GO:0008281,molecular_function,sulfonylurea receptor activity;…	-
LOC113844815	NC_040046.1;NC_040046.1;NC_040046.1	837379;837618;837957	837511;837724;838203	+;+;+	487	82.82695049	85.94327563	97.47406748	16.07139571	20.2454567	14.82288811	3.88E-08	3.66E-06	2.687673752	A0A1V4KFQ1,Phosphodiesterase	-	-	IPR023088,3'5'-cyclic nucleotide phosphodiesterase;IPR003018,GAF domain;IPR029016,GAF-like domain superfamily;IPR002073,3'5'-cyclic nucleotide phosphodiesterase, catalytic domain;IPR003607,HD/PDEase domain;IPR023174,3'5'-cyclic nucleotide phosphodiesterase, conserved site;IPR036971,3'5'-cyclic nucleotide phosphodiesterase, catalytic domain superfamily	-	GO:0016787,molecular_function,hydrolase activity;GO:0004114,molecular_function,3',5'-cyclic-nucleotide phosphodiesterase activity;GO:0046872,molecular_function,metal ion binding;GO:0007165,biological_process,signal transduction;GO:0008081,molecular_function,phosphoric diester hydrolase activity	-
9bdea004-97b4-41c3-b65f-69580ba4add2	NC_040052.1	11232750	11233073	-	324	730.6509595	783.6289249	607.053559	191.3642226	177.001421	213.146116	3.96E-08	3.72E-06	2.185258734	-	-	-	-	-	-	-
PCDH10	NC_040049.1;NC_040049.1;NC_040049.1;NC_040049.1;NC_040049.1;NC_040049.1;NC_040049.1;NC_040049.1	39247271;39255743;39257773;39269993;39278762;39279442;39280777;39281273	39253430;39255817;39257865;39270298;39278868;39279500;39281270;39284741	-;-;-;-;-;-;-;-	10763	0.424270342	0.572533924	0.612454577	4.155964395	3.819107113	3.714934017	4.08E-08	3.81E-06	-2.555084967	Q90ZT4,OL-protocadherin isoform	NP_999837.1,protocadherin-10 precursor	PF08266,Cadherin-like;PF00028,Cadherin domain;PF16492,Cadherin cytoplasmic C-terminal	IPR002126,Cadherin;IPR013164,Cadherin, N-terminal;IPR032455,Cadherin, cytoplasmic C-terminal domain;IPR015919,Cadherin-like;IPR030712,Protocadherin-10;IPR020894,Cadherin conserved site	-	GO:0007155,biological_process,cell adhesion;GO:0007156,biological_process,homophilic cell adhesion via plasma membrane adhesion molecules;GO:0005509,molecular_function,calcium ion binding;GO:0005886,cellular_component,plasma membrane;GO:0016020,cellular_component,membrane;GO:0016021,cellular_component,integral component of membrane	-
ae68a200-0cf8-4eed-9f55-274d7bf12fde	NC_040050.1	2580489	2581314	-	826	95.36413327	100.0849641	112.7626693	31.49680076	33.44792292	27.77187922	4.15E-08	3.84E-06	2.042632233	A0A091KUR9,LIM zinc-binding domain-containing Nebulette	-	PF14604,Variant SH3 domain;PF00880,Nebulin repeat	IPR036028,SH3-like domain superfamily;IPR001452,SH3 domain;IPR035629,Nebulin, SH3 domain;IPR000900,Nebulin repeat	-	-	-
AMPD3	NC_040052.1;NC_040052.1;NC_040052.1;NC_040052.1;NC_040052.1;NC_040052.1;NC_040052.1;NC_040052.1;NC_040052.1;NC_040052.1;NC_040052.1;NC_040052.1;NC_040052.1;NC_040052.1;NC_040052.1;NC_040052.1;NC_040052.1;NC_040052.1;NC_040052.1;NC_040052.1;NC_040052.1;NC_040052.1;NC_040052.1;NC_040052.1;NC_040052.1;NC_040052.1;NC_040052.1;NC_040052.1;NC_040052.1;NC_040052.1;NC_040052.1;NC_040052.1;NC_040052.1;NC_…	3000488;3001631;3001631;3001633;3001634;3005260;3005260;3005260;3005260;3005260;3007965;3007965;3007965;3007965;3007965;3008636;3008636;3008636;3008636;3008636;3010409;3010409;3010409;3010409;3010409;3013148;3013148;3013148;3013148;3013148;3021205;3021205;3021205;3021205;3021205;3021622;3021622;3021622;3021622;3021622;3022632;3022632;3022632;3022632;3022632;3024386;3024386;3024386;3024386;3024386…	3001508;3001806;3001806;3001806;3001806;3005485;3005485;3005485;3005485;3005485;3008160;3008160;3008160;3008160;3008160;3008801;3008801;3008801;3008801;3008801;3010628;3010628;3010628;3010628;3010628;3013277;3013277;3013277;3013277;3013277;3021399;3021399;3021399;3021399;3021399;3021753;3021753;3021753;3021753;3021753;3022795;3022795;3022795;3022795;3022795;3024512;3024512;3024512;3024512;3024512…	+;+;+;+;+;+;+;+;+;+;+;+;+;+;+;+;+;+;+;+;+;+;+;+;+;+;+;+;+;+;+;+;+;+;+;+;+;+;+;+;+;+;+;+;+;+;+;+;+;+;+;+;+;+;+;+;+;+;+;+;+;+;+;+;+;+;+;+;+;+	5071	11.99162206	15.25120367	12.74588046	4.466482883	4.168352061	3.93053859	4.21E-08	3.87E-06	1.97872471	U3IA17,AMP deaminase	-	PF00962,Adenosine/AMP deaminase	IPR006650,Adenosine/AMP deaminase active site;IPR006329,AMP deaminase;IPR032466,Metal-dependent hydrolase;IPR029771,AMP deaminase 3;IPR001365,Adenosine/AMP deaminase domain	-	GO:0046034,biological_process,ATP metabolic process;GO:0019239,molecular_function,deaminase activity;GO:0016787,molecular_function,hydrolase activity;GO:0046039,biological_process,GTP metabolic process;GO:0034101,biological_process,erythrocyte homeostasis;GO:0006188,biological_process,IMP biosynthetic process;GO:0046872,molecular_function,metal ion binding;GO:0032264,biological_process,IMP salvag…	-
LOC113839912	NC_040072.1;NC_040072.1	1381740;1384792	1382319;1385978	+;+	1767	0.043071323	0.039183932	0	5.666676987	4.95760758	5.515171355	4.25E-08	3.87E-06	-7.118312338	-	-	-	-	-	-	-
RBM38	NC_040066.1;NC_040066.1;NC_040066.1;NC_040066.1;NC_040066.1;NC_040066.1;NC_040066.1;NC_040066.1;NC_040066.1	10047405;10047405;10048197;10048545;10049179;10049929;10049929;10061299;10061299	10047562;10047774;10048320;10048756;10049302;10049983;10049983;10062758;10062758	+;+;+;+;+;+;+;+;+	2345	40.58500581	49.92813213	45.04937939	17.52728027	14.76109971	16.4179025	4.24E-08	3.87E-06	1.787246887	W6HU63,RNA binding motif protein 38	-	PF00076,RNA recognition motif. (a.k.a. RRM, RBD, or RNP domain)	IPR000504,RNA recognition motif domain;IPR035979,RNA-binding domain superfamily;IPR012677,Nucleotide-binding alpha-beta plait domain superfamily	-	GO:0003723,molecular_function,RNA binding;GO:0003676,molecular_function,nucleic acid binding	-
GPRC5B	NC_040060.1;NC_040060.1;NC_040060.1;NC_040060.1;NC_040060.1;NC_040060.1;NC_040060.1;NC_040060.1;NC_040060.1;NC_040060.1;NC_040060.1;NC_040060.1	8548958;8548959;8551113;8555094;8555094;8555098;8560537;8560537;8560537;8562029;8562029;8562029	8549172;8549172;8551263;8556107;8556107;8556107;8560649;8560649;8560649;8565605;8565605;8565605	+;+;+;+;+;+;+;+;+;+;+;+	5070	20.57291558	26.41832831	23.22571728	8.882982165	9.324679928	10.25938442	4.28E-08	3.87E-06	1.614001774	E1BT99,G protein-coupled receptor class C group 5 member B	XP_015150284.1,-;XP_015150281.1,-;XP_015150283.1,-;XP_015150280.1,G-protein coupled receptor family C group 5 member B isoform X3	PF00003,7 transmembrane sweet-taste receptor of 3 GCPR	IPR017978,GPCR family 3, C-terminal	ENOG410Y0Z8,-;ENOG410IE42,-	GO:0030295,molecular_function,protein kinase activator activity;GO:0070062,cellular_component,extracellular exosome;GO:0016020,cellular_component,membrane;GO:0005730,cellular_component,nucleolus;GO:0007186,biological_process,G-protein coupled receptor signaling pathway;GO:0032147,biological_process,activation of protein kinase activity;GO:0043231,cellular_component,intracellular membrane-bounded …	-
LOC101793676	NC_040073.1;NC_040073.1;NC_040073.1;NC_040073.1;NC_040073.1;NC_040073.1;NC_040073.1;NC_040073.1;NC_040073.1;NC_040073.1;NC_040073.1;NC_040073.1;NC_040073.1;NC_040073.1;NC_040073.1;NC_040073.1	3226780;3228561;3229185;3229870;3230130;3230360;3231022;3231392;3236538;3238775;3239157;3239573;3239823;3240037;3240618;3241169	3227372;3228643;3229341;3230031;3230255;3230580;3231059;3231486;3237062;3238857;3239313;3239734;3239948;3240257;3240667;3241465	+;+;+;+;+;+;+;+;+;+;+;+;+;+;+;+	3096	1.216827484	1.833823183	1.38256498	165.8470052	129.9043954	87.06071504	4.32E-08	3.88E-06	-6.127227281	A0A212D6S5,KRT17	-	-	IPR018039,Intermediate filament protein, conserved site;IPR001664,Intermediate filament protein;IPR002957,Keratin, type I	-	GO:0005882,cellular_component,intermediate filament;GO:0005198,molecular_function,structural molecule activity	-
CLEC19A	NC_040060.1;NC_040060.1;NC_040060.1;NC_040060.1;NC_040060.1	8831294;8836166;8836740;8837071;8837670	8831530;8836331;8836833;8837203;8837954	+;+;+;+;+	915	84.50791316	163.1822537	129.3950271	12.85466345	11.39562055	11.61486232	4.38E-08	3.90E-06	3.693679819	A0A1D5PRJ1,C-type lectin domain containing 19A	XP_001234358.4,C-type lectin domain family 19 member A	-	IPR016187,C-type lectin fold;IPR018378,C-type lectin, conserved site;IPR001304,C-type lectin-like;IPR016186,C-type lectin-like/link domain superfamily;IPR033988,CEL-1-like C-type lectin-like domain	-	-	-
TENM4	NC_040046.1;NC_040046.1;NC_040046.1;NC_040046.1;NC_040046.1;NC_040046.1;NC_040046.1;NC_040046.1;NC_040046.1;NC_040046.1;NC_040046.1;NC_040046.1;NC_040046.1;NC_040046.1;NC_040046.1;NC_040046.1;NC_040046.1;NC_040046.1;NC_040046.1;NC_040046.1;NC_040046.1;NC_040046.1;NC_040046.1;NC_040046.1;NC_040046.1;NC_040046.1;NC_040046.1;NC_040046.1;NC_040046.1;NC_040046.1;NC_040046.1;NC_040046.1;NC_040046.1;NC_…	3527790;3537546;3542208;3545062;3552000;3556664;3567520;3572061;3580839;3590904;3592176;3594479;3601107;3607044;3620733;3620824;3636809;3644633;3650562;3667898;3672341;3676901;3693751;3698784;3703849;3724613;3726896;3732220;3774629;3853370;3858103;3911529;3999688;4017094;4111740	3528548;3537688;3543822;3545358;3552235;3556836;3568397;3572215;3581071;3591153;3592319;3594746;3601368;3607163;3620821;3620948;3636955;3644659;3650747;3668098;3672535;3677002;3693961;3698998;3704019;3724848;3726994;3732472;3774838;3853639;3858391;3911626;3999770;4017236;4112169	-;-;-;-;-;-;-;-;-;-;-;-;-;-;-;-;-;-;-;-;-;-;-;-;-;-;-;-;-;-;-;-;-;-;-	9313	3.031859489	3.323245907	3.598807884	12.68132129	12.24343043	15.01590911	4.39E-08	3.90E-06	-1.689541488	A0A151N5I6,Uncharacterized protein	-	PF06484,Teneurin Intracellular Region;PF15636,HH signature containing HNH/Endo VII superfamily nuclease toxin	IPR008969,Carboxypeptidase-like, regulatory domain superfamily;IPR027688,Teneurin-1/4;IPR022385,Rhs repeat-associated core;IPR028916,Tox-GHH domain;IPR006530,YD repeat;IPR011042,Six-bladed beta-propeller, TolB-like;IPR011044,Quinoprotein amine dehydrogenase, beta chain-like;IPR000742,EGF-like domain;IPR013032,EGF-like, conserved site;IPR009471,Teneurin intracellular, N-terminal	-	GO:0048666,biological_process,neuron development;GO:0097264,biological_process,self proteolysis;GO:0007165,biological_process,signal transduction;GO:0016021,cellular_component,integral component of membrane;GO:0016020,cellular_component,membrane	-
FRMD3	NC_040075.1;NC_040075.1;NC_040075.1;NC_040075.1;NC_040075.1;NC_040075.1;NC_040075.1;NC_040075.1;NC_040075.1;NC_040075.1;NC_040075.1;NC_040075.1;NC_040075.1;NC_040075.1;NC_040075.1;NC_040075.1	39663547;39665466;39685197;39688962;39689597;39693281;39694384;39697410;39697488;39699015;39711343;39712691;39723895;39732313;39745184;39805142	39665463;39665513;39685318;39689030;39689671;39693369;39694447;39697485;39697497;39699102;39711466;39712788;39723973;39732355;39745288;39805347	-;-;-;-;-;-;-;-;-;-;-;-;-;-;-;-	3213	17.3153556	15.60171711	13.76182719	3.551888357	3.024486015	3.232796185	4.43E-08	3.91E-06	2.570509143	H0YYC9,FERM domain containing 3	-	PF09379,RM N-terminal domain;PF00373,RM central domain;PF08736,RM adjacent (FA);PF09380,RM C-terminal PH-like domain	IPR019748,FERM central domain;IPR014847,FERM adjacent (FA);IPR035963,FERM superfamily, second domain;IPR018980,FERM, C-terminal PH-like domain;IPR000299,FERM domain;IPR019747,FERM conserved site;IPR011993,PH-like domain superfamily;IPR018979,FERM, N-terminal;IPR019749,Band 4.1 domain;IPR014352,FERM/acyl-CoA-binding protein superfamily;IPR000798,Ezrin/radixin/moesin-like;IPR029071,Ubiquitin-like d…	ENOG410XSWH,-;KOG3530,FERM domain protein EHM2	GO:0005856,cellular_component,cytoskeleton;GO:0016020,cellular_component,membrane;GO:0016021,cellular_component,integral component of membrane;GO:0008092,molecular_function,cytoskeletal protein binding	-
LOC101795831	NC_040048.1;NC_040048.1;NC_040048.1;NC_040048.1;NC_040048.1;NC_040048.1;NC_040048.1;NC_040048.1;NC_040048.1;NC_040048.1;NC_040048.1;NC_040048.1;NC_040048.1;NC_040048.1;NC_040048.1;NC_040048.1;NC_040048.1;NC_040048.1;NC_040048.1;NC_040048.1;NC_040048.1;NC_040048.1;NC_040048.1	64153374;64160641;64160643;64160644;64189574;64189574;64189574;64189574;64196779;64196779;64196779;64203715;64203715;64203715;64203715;64205719;64205719;64205719;64205719;64206454;64227673;64227673;64227673	64153520;64161134;64161134;64161134;64189783;64189783;64189783;64189783;64196820;64196820;64196820;64203852;64203852;64203852;64203852;64205745;64205745;64205745;64205745;64206473;64227809;64227809;64227809	+;+;+;+;+;+;+;+;+;+;+;+;+;+;+;+;+;+;+;+;+;+;+	1215	36.45620605	30.23108042	32.65802825	5.326169241	5.312596764	4.059926019	4.48E-08	3.91E-06	3.071775591	A0A1D5NY74,Triadin	-	-	IPR010798,Triadin	-	GO:0016529,cellular_component,sarcoplasmic reticulum;GO:0005102,molecular_function,signaling receptor binding;GO:0016021,cellular_component,integral component of membrane;GO:0016020,cellular_component,membrane	-
LOC113843431	NC_040049.1;NC_040049.1	69880983;69897285	69881906;69899219	-;-	2859	1.357627993	1.586250248	1.332485082	0.030587597	0.012405023	0.014027334	4.47E-08	3.91E-06	6.444967615	R0LQ53,Uncharacterized protein	-	-	-	-	-	-
LDB3	NC_040051.1;NC_040051.1;NC_040051.1;NC_040051.1;NC_040051.1;NC_040051.1;NC_040051.1;NC_040051.1;NC_040051.1;NC_040051.1;NC_040051.1;NC_040051.1;NC_040051.1;NC_040051.1;NC_040051.1;NC_040051.1;NC_040051.1;NC_040051.1;NC_040051.1;NC_040051.1;NC_040051.1;NC_040051.1;NC_040051.1;NC_040051.1;NC_040051.1;NC_040051.1;NC_040051.1;NC_040051.1;NC_040051.1;NC_040051.1;NC_040051.1;NC_040051.1;NC_040051.1;NC_…	28731538;28731538;28731538;28731538;28731538;28731538;28731538;28731538;28731538;28731538;28731538;28731538;28731538;28731538;28731538;28731538;28731538;28731538;28738075;28738075;28738075;28738075;28738075;28738075;28738075;28738075;28738075;28738075;28738075;28738075;28738075;28738075;28738075;28738075;28738075;28738075;28739623;28739623;28739623;28739623;28739623;28739623;28739623;28739623;287…	28736038;28736038;28736038;28736038;28736038;28736038;28736038;28736038;28736038;28736038;28736038;28736038;28736038;28736038;28736038;28736038;28736038;28736038;28738190;28738190;28738190;28738190;28738190;28738190;28738190;28738190;28738190;28738190;28738190;28738190;28738190;28738190;28738190;28738190;28738190;28738190;28739743;28739743;28739743;28739743;28739743;28739743;28739743;28739743;287…	-;-;-;-;-;-;-;-;-;-;-;-;-;-;-;-;-;-;-;-;-;-;-;-;-;-;-;-;-;-;-;-;-;-;-;-;-;-;-;-;-;-;-;-;-;-;-;-;-;-;-;-;-;-;-;-;-;-;-;-;-;-;-;-;-;-;-;-;-;-;-;-;-;-;-;-;-;-;-;-;-;-;-;-;-;-;-;-;-;-;-;-;-;-;-;-;-;-;-;-;-;-;-;-;-;-;-;-;-;-;-;-;-;-;-;-;-;-;-;-;-;-;-;-;-;-;-;-;-;-;-;-;-;-;-;-;-;-;-;-;-;-;-;-;-;-;-;-;-;-;-;-;-;-;-;-;-;-;-;-;-;-;-;-;-;-;-;-;-;-;-;-;-;-;-;-;-;-;-;-;-;-;-;-;-;-;-;-;-;-;-;-;-;-;-;-;-;-;-;-…	8653	41.26385327	42.45258825	39.59377223	17.45360545	16.27589677	17.47285741	4.52E-08	3.92E-06	1.583521012	U3J4C0,LIM domain binding 3	-	PF15936,omain of unknown function (DUF4749);PF00595,PDZ domain (Also known as DHR or GLGF);PF00412,LIM domain	IPR001781,Zinc finger, LIM-type;IPR031847,Domain of unknown function DUF4749;IPR036034,PDZ superfamily;IPR006643,Zasp-like motif;IPR001478,PDZ domain	-	GO:0045214,biological_process,sarcomere organization;GO:0008092,molecular_function,cytoskeletal protein binding;GO:0046872,molecular_function,metal ion binding;GO:0005856,cellular_component,cytoskeleton;GO:0030018,cellular_component,Z disc;GO:0051371,molecular_function,muscle alpha-actinin binding;GO:0005080,molecular_function,protein kinase C binding	-
SOX21	NC_040046.1;NC_040046.1	52056681;52057620	52057570;52058278	-;-	1549	0.270231539	0.290540378	0.442135177	12.05330044	9.478959479	8.543814459	4.57E-08	3.94E-06	-4.602905432	A0A226M6J9,Uncharacterized protein	-	-	IPR009071,High mobility group box domain;IPR036910,High mobility group box domain superfamily;IPR022097,Transcription factor SOX	-	GO:0006355,biological_process,regulation of transcription, DNA-templated;GO:0003677,molecular_function,DNA binding;GO:0005634,cellular_component,nucleus	-
DSP	NC_040047.1;NC_040047.1;NC_040047.1;NC_040047.1;NC_040047.1;NC_040047.1;NC_040047.1;NC_040047.1;NC_040047.1;NC_040047.1;NC_040047.1;NC_040047.1;NC_040047.1;NC_040047.1;NC_040047.1;NC_040047.1;NC_040047.1;NC_040047.1;NC_040047.1;NC_040047.1;NC_040047.1;NC_040047.1;NC_040047.1;NC_040047.1;NC_040047.1	67947570;67953079;67953155;67956267;67957022;67957911;67958607;67959560;67961077;67961559;67962517;67963271;67963818;67964515;67966184;67967286;67967958;67969284;67970331;67971484;67972642;67975629;67976157;67977808;67986168	67951541;67953152;67955369;67956365;67957129;67957994;67958769;67959753;67961215;67961725;67962734;67963475;67963944;67964669;67966336;67967411;67968053;67969388;67970492;67971534;67972770;67975803;67976305;67977910;67986594	-;-;-;-;-;-;-;-;-;-;-;-;-;-;-;-;-;-;-;-;-;-;-;-;-	9596	0.908113247	1.29153848	1.592445144	31.74571376	29.32705375	21.69034226	4.64E-08	3.96E-06	-4.151128871	R0KCY9,Desmoplakin	XP_005010786.1,-	PF00681,Plectin repeat	IPR035915,Plakin repeat superfamily;IPR028462,Desmoplakin;IPR001101,Plectin repeat	-	GO:0098609,biological_process,cell-cell adhesion;GO:0005856,cellular_component,cytoskeleton;GO:0030054,cellular_component,cell junction;GO:0050839,molecular_function,cell adhesion molecule binding	K10381,ko05412,Arrhythmogenic right ventricular cardiomyopathy (ARVC)
MYOT	NC_040059.1;NC_040059.1;NC_040059.1;NC_040059.1;NC_040059.1;NC_040059.1;NC_040059.1;NC_040059.1;NC_040059.1;NC_040059.1;NC_040059.1;NC_040059.1;NC_040059.1;NC_040059.1;NC_040059.1;NC_040059.1;NC_040059.1;NC_040059.1;NC_040059.1;NC_040059.1;NC_040059.1;NC_040059.1;NC_040059.1;NC_040059.1;NC_040059.1;NC_040059.1;NC_040059.1;NC_040059.1;NC_040059.1;NC_040059.1;NC_040059.1;NC_040059.1;NC_040059.1;NC_…	6257628;6257629;6266516;6266516;6267894;6267894;6268525;6268525;6269269;6269269;6269872;6269872;6270590;6270590;6275074;6275075;6276686;6276686;6277330;6278955;6278955;6278955;6278955;6278955;6280555;6280555;6280555;6280555;6280555;6282490;6282490;6282490;6282490;6282490;6283067;6283067;6283067;6283067;6283067;6284352;6284352;6284352;6284352;6284352;6285029;6285029;6285029;6285029;6285029;6285703…	6257770;6257770;6266589;6266589;6267956;6267956;6268666;6268666;6269292;6269292;6269991;6269991;6270848;6270848;6275211;6275211;6277285;6277285;6278187;6279105;6279105;6279105;6279105;6279105;6280653;6280653;6280653;6280653;6280653;6282539;6282539;6282539;6282539;6282539;6283199;6283199;6283199;6283199;6283199;6284559;6284559;6284559;6284559;6284559;6285194;6285194;6285194;6285194;6285194;6285836…	+;+;+;+;+;+;+;+;+;+;+;+;+;+;+;+;+;+;+;+;+;+;+;+;+;+;+;+;+;+;+;+;+;+;+;+;+;+;+;+;+;+;+;+;+;+;+;+;+;+;+;+;+;+;+;+;+;+;+	3950	152.4549012	170.8250626	180.6554467	57.44022069	50.18209143	47.81023531	4.65E-08	3.96E-06	2.005651133	A0A1V4KUI8,Myotilin	-	-	IPR007110,Immunoglobulin-like domain;IPR003915,Polycystic kidney disease type 2 protein;IPR013122,Polycystin cation channel, PKD1/PKD2;IPR036179,Immunoglobulin-like domain superfamily;IPR027359,Voltage-dependent channel domain superfamily;IPR003599,Immunoglobulin subtype;IPR003598,Immunoglobulin subtype 2;IPR013098,Immunoglobulin I-set;IPR013783,Immunoglobulin-like fold	-	GO:0005509,molecular_function,calcium ion binding;GO:0016021,cellular_component,integral component of membrane;GO:0016020,cellular_component,membrane	-
TFAP2B	NC_040048.1;NC_040048.1;NC_040048.1;NC_040048.1;NC_040048.1;NC_040048.1;NC_040048.1;NC_040048.1;NC_040048.1;NC_040048.1;NC_040048.1;NC_040048.1;NC_040048.1;NC_040048.1;NC_040048.1	113825921;113825925;113829396;113830679;113830679;113836190;113836190;113844208;113844208;113846947;113846947;113849617;113849617;113851702;113851702	113826193;113826193;113829422;113831137;113831137;113836250;113836250;113844427;113844427;113847065;113847065;113849758;113849758;113857118;113857118	+;+;+;+;+;+;+;+;+;+;+;+;+;+;+	6718	0.005664411	0.010306342	0.025486283	4.002806912	2.850791818	2.238620903	4.71E-08	3.99E-06	-7.459846818	A0A1U7S7J6,transcription factor AP-2-beta isoform X1	XP_006025726.1,transcription factor AP-2-beta isoform X1	-	IPR004979,Transcription factor AP-2;IPR008122,Transcription factor AP-2 beta;IPR013854,Transcription factor AP-2, C-terminal	-	GO:0006355,biological_process,regulation of transcription, DNA-templated;GO:0003700,molecular_function,DNA binding transcription factor activity;GO:0005634,cellular_component,nucleus	-
MYOM2	NC_040048.1;NC_040048.1;NC_040048.1;NC_040048.1;NC_040048.1;NC_040048.1;NC_040048.1;NC_040048.1;NC_040048.1;NC_040048.1;NC_040048.1;NC_040048.1;NC_040048.1;NC_040048.1;NC_040048.1;NC_040048.1;NC_040048.1;NC_040048.1;NC_040048.1;NC_040048.1;NC_040048.1;NC_040048.1;NC_040048.1;NC_040048.1;NC_040048.1;NC_040048.1;NC_040048.1;NC_040048.1;NC_040048.1;NC_040048.1;NC_040048.1;NC_040048.1;NC_040048.1;NC_…	96386672;96386672;96386672;96391075;96391075;96391075;96391964;96391964;96391964;96392109;96392109;96392109;96392474;96392474;96392474;96395268;96395268;96395268;96396079;96396079;96396079;96397650;96397650;96397650;96399106;96399106;96399106;96403676;96403676;96403676;96404975;96404975;96404975;96405150;96405150;96405150;96409445;96409445;96409445;96410090;96410090;96410090;96411967;96411967;964…	96387687;96387687;96387687;96391130;96391130;96391130;96391986;96391986;96391986;96392145;96392145;96392145;96392637;96392637;96392637;96395373;96395373;96395373;96396117;96396117;96396117;96397737;96397737;96397737;96399219;96399219;96399219;96403743;96403743;96403743;96405034;96405034;96405034;96405294;96405294;96405294;96409581;96409581;96409581;96410134;96410134;96410134;96412073;96412073;964…	-;-;-;-;-;-;-;-;-;-;-;-;-;-;-;-;-;-;-;-;-;-;-;-;-;-;-;-;-;-;-;-;-;-;-;-;-;-;-;-;-;-;-;-;-;-;-;-;-;-;-;-;-;-;-;-;-;-;-;-;-;-;-;-;-;-;-;-;-;-;-;-;-;-;-;-;-;-;-;-;-;-;-;-;-;-;-;-;-;-;-;-;-;-;-;-;-;-;-;-;-;-;-;-;-;-;-;-;-;-;-;-;-;-;-;-	5675	189.2483396	191.4629152	208.8166702	38.13896102	45.6464116	32.2175872	4.86E-08	4.09E-06	2.655412522	R0M1Q9,M-protein, striated muscle	-	PF00041,ibronectin type III domain;PF07679,Immunoglobulin I-set domain	IPR003961,Fibronectin type III;IPR007110,Immunoglobulin-like domain;IPR036116,Fibronectin type III superfamily;IPR036179,Immunoglobulin-like domain superfamily;IPR013783,Immunoglobulin-like fold;IPR003599,Immunoglobulin subtype;IPR003598,Immunoglobulin subtype 2;IPR013098,Immunoglobulin I-set	-	-	-
SMYD1	NC_040049.1;NC_040049.1;NC_040049.1;NC_040049.1;NC_040049.1;NC_040049.1;NC_040049.1;NC_040049.1;NC_040049.1;NC_040049.1;NC_040049.1;NC_040049.1;NC_040049.1;NC_040049.1;NC_040049.1;NC_040049.1;NC_040049.1;NC_040049.1;NC_040049.1	70653083;70653084;70662007;70662007;70663174;70663174;70664759;70664759;70666470;70669218;70669218;70671934;70671934;70672506;70672506;70673497;70673497;70674838;70674838	70653528;70653528;70662183;70662183;70663387;70663387;70664889;70664889;70666508;70669410;70669410;70672026;70672026;70672669;70672669;70673665;70673665;70675277;70675277	+;+;+;+;+;+;+;+;+;+;+;+;+;+;+;+;+;+;+	2066	227.0685969	236.1498627	241.9080236	106.5610969	107.5308739	110.1408188	4.97E-08	4.17E-06	1.43521768	U3I3D4,SET and MYND domain containing 1	-	PF00856,SET domain;PF01753,MYND finger	IPR001214,SET domain;IPR002893,Zinc finger, MYND-type;IPR011990,Tetratricopeptide-like helical domain superfamily	-	GO:0045663,biological_process,positive regulation of myoblast differentiation;GO:0007507,biological_process,heart development;GO:0005737,cellular_component,cytoplasm;GO:0045892,biological_process,negative regulation of transcription, DNA-templated;GO:0006338,biological_process,chromatin remodeling;GO:0010831,biological_process,positive regulation of myotube differentiation;GO:0003714,molecular_fu…	-
CDH13	NC_040057.1;NC_040057.1;NC_040057.1;NC_040057.1;NC_040057.1;NC_040057.1;NC_040057.1;NC_040057.1;NC_040057.1;NC_040057.1;NC_040057.1;NC_040057.1;NC_040057.1;NC_040057.1;NC_040057.1	6551778;6570155;6571814;6584134;6584217;6609522;6611042;6640613;6694238;6749631;6801090;6834463;6863685;6934292;7024756	6554248;6570370;6572047;6584214;6584275;6609775;6611224;6640753;6694416;6749775;6801242;6834579;6863893;6934403;7024921	-;-;-;-;-;-;-;-;-;-;-;-;-;-;-	4720	9.142517994	9.659582121	9.839527496	3.770352326	3.373774767	3.560092734	5.05E-08	4.21E-06	1.733270873	R0LH57,Cadherin-13	-	PF08758,Cadherin prodomain like;PF00028,Cadherin domain	IPR020894,Cadherin conserved site;IPR002126,Cadherin;IPR014868,Cadherin prodomain;IPR015919,Cadherin-like;IPR033216,Cadherin-13	-	GO:0007155,biological_process,cell adhesion;GO:0042803,molecular_function,protein homodimerization activity;GO:0007156,biological_process,homophilic cell adhesion via plasma membrane adhesion molecules;GO:0005509,molecular_function,calcium ion binding;GO:0005886,cellular_component,plasma membrane;GO:0016020,cellular_component,membrane	-
LOC106016036	NC_040057.1;NC_040057.1;NC_040057.1;NC_040057.1;NC_040057.1;NC_040057.1;NC_040057.1;NC_040057.1;NC_040057.1;NC_040057.1;NC_040057.1;NC_040057.1;NC_040057.1;NC_040057.1;NC_040057.1;NC_040057.1;NC_040057.1;NC_040057.1;NC_040057.1;NC_040057.1;NC_040057.1;NC_040057.1;NC_040057.1;NC_040057.1;NC_040057.1;NC_040057.1;NC_040057.1;NC_040057.1;NC_040057.1;NC_040057.1;NC_040057.1;NC_040057.1	5184200;5184822;5184998;5185004;5185004;5185146;5185146;5186052;5186052;5186052;5186052;5186052;5186482;5186482;5186482;5186482;5186482;5188824;5188824;5188824;5188824;5188824;5190112;5190968;5190968;5190968;5190968;5191536;5191536;5191536;5191536;5192093	5184773;5185056;5185221;5185221;5185221;5185221;5185221;5186085;5186085;5186085;5186085;5186085;5186564;5186564;5186564;5186564;5186564;5188873;5188873;5188873;5188873;5188873;5190957;5191042;5191042;5191042;5191042;5191903;5191903;5191903;5191707;5192754	+;+;+;+;+;+;+;+;+;+;+;+;+;+;+;+;+;+;+;+;+;+;+;+;+;+;+;+;+;+;+;+	3092	2.006055236	1.477913474	1.799659616	0.056565292	0.045880934	0.03891088	5.14E-08	4.21E-06	5.501218248	A0A226PEF6,Uncharacterized protein	-	-	IPR016130,Protein-tyrosine phosphatase, active site;IPR029021,Protein-tyrosine phosphatase-like;IPR000340,Dual specificity phosphatase, catalytic domain;IPR020422,Dual specificity protein phosphatase domain;IPR000387,Tyrosine specific protein phosphatases domain;IPR024950,Dual specificity phosphatase	-	GO:0008138,molecular_function,protein tyrosine/serine/threonine phosphatase activity;GO:0004725,molecular_function,protein tyrosine phosphatase activity;GO:0035335,biological_process,peptidyl-tyrosine dephosphorylation;GO:0006470,biological_process,protein dephosphorylation;GO:0016311,biological_process,dephosphorylation;GO:0016791,molecular_function,phosphatase activity	-
PRRX1	NC_040053.1;NC_040053.1;NC_040053.1;NC_040053.1;NC_040053.1;NC_040053.1;NC_040053.1;NC_040053.1;NC_040053.1	26766278;26766282;26797053;26797053;26797480;26797480;26798922;26802227;26802227	26766856;26766856;26797228;26797228;26797661;26797661;26798990;26802361;26803275	+;+;+;+;+;+;+;+;+	2055	14.46218709	11.99451605	17.35080701	95.57789163	95.4560756	106.5150539	5.15E-08	4.21E-06	-2.446971023	A0A0Q3LVX5,Paired mesoderm homeobox protein 1 isoform X1	-	PF03826,OAR domain;PF00046,Homeobox domain	IPR017970,Homeobox, conserved site;IPR001356,Homeobox domain;IPR009057,Homeobox-like domain superfamily;IPR003654,OAR domain	-	GO:0006355,biological_process,regulation of transcription, DNA-templated;GO:0043565,molecular_function,sequence-specific DNA binding;GO:0003677,molecular_function,DNA binding;GO:0007275,biological_process,multicellular organism development;GO:0005634,cellular_component,nucleus	-
PRXL2A	NC_040051.1;NC_040051.1;NC_040051.1;NC_040051.1;NC_040051.1;NC_040051.1;NC_040051.1;NC_040051.1;NC_040051.1;NC_040051.1;NC_040051.1;NC_040051.1;NC_040051.1;NC_040051.1;NC_040051.1;NC_040051.1;NC_040051.1;NC_040051.1	26707538;26707943;26710209;26712632;26712632;26712632;26713313;26713313;26713313;26716878;26716878;26716878;26717998;26717998;26717998;26718306;26718306;26718306	26707558;26708118;26710363;26712811;26712811;26712811;26713404;26713404;26713404;26717018;26717018;26717018;26718162;26718162;26718162;26718446;26718776;26718446	+;+;+;+;+;+;+;+;+;+;+;+;+;+;+;+;+;+	1401	235.3016361	205.1688694	216.8013467	51.43379823	48.45242763	39.73201742	5.15E-08	4.21E-06	2.549673884	A0A0F6YFH3,Selenoprotein U	NP_001180448.1,-;NP_001180447.1,selenoprotein U	PF13911,AhpC/TSA antioxidant enzyme	IPR032802,Peroxiredoxin-like FAM213A;IPR032801,Peroxiredoxin-like FAM213/AAED1;IPR036249,Thioredoxin-like superfamily	-	GO:0055114,biological_process,oxidation-reduction process;GO:0016021,cellular_component,integral component of membrane;GO:0016020,cellular_component,membrane	-
SDK2	NC_040064.1;NC_040064.1;NC_040064.1;NC_040064.1;NC_040064.1;NC_040064.1;NC_040064.1;NC_040064.1;NC_040064.1;NC_040064.1;NC_040064.1;NC_040064.1;NC_040064.1;NC_040064.1;NC_040064.1;NC_040064.1;NC_040064.1;NC_040064.1;NC_040064.1;NC_040064.1;NC_040064.1;NC_040064.1;NC_040064.1;NC_040064.1;NC_040064.1;NC_040064.1;NC_040064.1;NC_040064.1;NC_040064.1;NC_040064.1;NC_040064.1;NC_040064.1;NC_040064.1;NC_…	11710;13454;13781;14590;14893;15738;15845;16016;17246;17503;18360;18671;18994;19755;20086;20230;20543;20831;22239;22515;22863;23070;23455;23701;23888;24000;24100;24410;24672;25537;25909;26186;26400;26781;27008;27355;27643;27963;28255;28536;28750;29167;30986;31934;33214;42383;58891	12110;13580;13919;14730;15057;15843;15864;16177;17383;17689;18475;18772;19050;19890;20156;20333;20744;21025;22337;22704;22978;23307;23605;23810;23997;24008;24291;24508;24867;25652;26090;26326;26547;26917;27184;27457;27810;28079;28449;28619;28940;29278;31119;32081;33320;42542;59307	-;-;-;-;-;-;-;-;-;-;-;-;-;-;-;-;-;-;-;-;-;-;-;-;-;-;-;-;-;-;-;-;-;-;-;-;-;-;-;-;-;-;-;-;-;-;-	6916	39.50060401	44.2248259	43.27458773	16.22932319	19.19449038	17.77896407	5.17E-08	4.21E-06	1.567893662	A0A1D5PKQ9,Protein sidekick-2	NP_989869.2,protein sidekick-2 precursor	-	IPR003961,Fibronectin type III;IPR007110,Immunoglobulin-like domain;IPR036116,Fibronectin type III superfamily;IPR036179,Immunoglobulin-like domain superfamily;IPR013783,Immunoglobulin-like fold;IPR003599,Immunoglobulin subtype;IPR003598,Immunoglobulin subtype 2;IPR013098,Immunoglobulin I-set	-	GO:0016021,cellular_component,integral component of membrane;GO:0016020,cellular_component,membrane	-
CACNA1C	NC_040046.1;NC_040046.1;NC_040046.1;NC_040046.1;NC_040046.1;NC_040046.1;NC_040046.1;NC_040046.1;NC_040046.1;NC_040046.1;NC_040046.1;NC_040046.1;NC_040046.1;NC_040046.1;NC_040046.1;NC_040046.1;NC_040046.1;NC_040046.1;NC_040046.1;NC_040046.1;NC_040046.1;NC_040046.1;NC_040046.1;NC_040046.1;NC_040046.1;NC_040046.1;NC_040046.1;NC_040046.1;NC_040046.1;NC_040046.1;NC_040046.1;NC_040046.1;NC_040046.1;NC_…	138509757;138509757;138509757;138509757;138509757;138509757;138509757;138509757;138509757;138509757;138509757;138509757;138509757;138509757;138509757;138509757;138509757;138509757;138509757;138509757;138509757;138509757;138509757;138509757;138509757;138509757;138509757;138509757;138509757;138509757;138509757;138509757;138516336;138516336;138516336;138516336;138516336;138516336;138516336;138516336…	138516632;138516632;138516632;138516632;138516270;138516632;138516632;138516632;138516632;138516632;138516632;138516632;138516632;138516632;138516632;138516632;138516632;138516632;138516632;138516632;138516632;138516632;138516632;138516632;138516632;138516632;138516632;138516632;138516632;138516632;138516632;138516632;138516632;138516632;138516632;138516632;138516632;138516632;138516632;138516632…	-;-;-;-;-;-;-;-;-;-;-;-;-;-;-;-;-;-;-;-;-;-;-;-;-;-;-;-;-;-;-;-;-;-;-;-;-;-;-;-;-;-;-;-;-;-;-;-;-;-;-;-;-;-;-;-;-;-;-;-;-;-;-;-;-;-;-;-;-;-;-;-;-;-;-;-;-;-;-;-;-;-;-;-;-;-;-;-;-;-;-;-;-;-;-;-;-;-;-;-;-;-;-;-;-;-;-;-;-;-;-;-;-;-;-;-;-;-;-;-;-;-;-;-;-;-;-;-;-;-;-;-;-;-;-;-;-;-;-;-;-;-;-;-;-;-;-;-;-;-;-;-;-;-;-;-;-;-;-;-;-;-;-;-;-;-;-;-;-;-;-;-;-;-;-;-;-;-;-;-;-;-;-;-;-;-;-;-;-;-;-;-;-;-;-;-;-;-;-;-…	14649	0.992316361	1.14380488	1.276909041	4.733961578	5.29967852	6.085843359	5.24E-08	4.21E-06	-1.926053063	A0A1V4K7Z6,Voltage-dependent L-type calcium channel subunit alpha	-	-	IPR002077,Voltage-dependent calcium channel, alpha-1 subunit;IPR014873,Voltage-dependent calcium channel, alpha-1 subunit, IQ domain;IPR005446,Voltage-dependent calcium channel, L-type, alpha-1 subunit;IPR031649,Voltage-dependent L-type calcium channel, IQ-associated domain;IPR005451,Voltage-dependent calcium channel, L-type, alpha-1C subunit;IPR027359,Voltage-dependent channel domain superfamily…	-	GO:0005216,molecular_function,ion channel activity;GO:0005262,molecular_function,calcium channel activity;GO:0055085,biological_process,transmembrane transport;GO:0006811,biological_process,ion transport;GO:0005245,molecular_function,voltage-gated calcium channel activity;GO:0005891,cellular_component,voltage-gated calcium channel complex;GO:0005244,molecular_function,voltage-gated ion channel ac…	-
LMX1B	NC_040063.1;NC_040063.1;NC_040063.1;NC_040063.1;NC_040063.1;NC_040063.1;NC_040063.1;NC_040063.1;NC_040063.1;NC_040063.1;NC_040063.1;NC_040063.1;NC_040063.1;NC_040063.1;NC_040063.1;NC_040063.1	11262797;11262798;11263895;11263895;11360011;11360011;11363987;11363987;11365158;11365158;11365639;11365639;11366683;11366683;11367268;11368636	11263503;11263503;11264081;11264081;11360243;11360243;11364165;11364165;11365235;11365235;11365705;11365705;11366844;11366844;11368627;11373762	+;+;+;+;+;+;+;+;+;+;+;+;+;+;+;+	8100	0.009395929	0.021369755	0.026422353	2.86641473	1.817083234	1.713090735	5.25E-08	4.21E-06	-6.47572933	A0A0Q3PXG3,LIM/homeobox protein LMX-1.2-like isoform X1	-	PF00046,Homeobox domain;PF00412,LIM domain	IPR017970,Homeobox, conserved site;IPR001356,Homeobox domain;IPR009057,Homeobox-like domain superfamily;IPR001781,Zinc finger, LIM-type	-	GO:0006355,biological_process,regulation of transcription, DNA-templated;GO:0043565,molecular_function,sequence-specific DNA binding;GO:0003677,molecular_function,DNA binding;GO:0005634,cellular_component,nucleus;GO:0046872,molecular_function,metal ion binding	-
LOC110351724	NC_040048.1;NC_040048.1	114548590;114560301	114549224;114561126	+;+	1461	42.45532368	43.07826719	41.33931747	15.71225838	16.99258956	18.77565827	5.25E-08	4.21E-06	1.618777014	-	-	-	-	-	-	-
793cdc1d-0f60-4ae4-bd34-dd00ab6947c9	NC_040065.1	526558	528893	-	2336	9.448218385	8.136058614	8.190703196	1.516148376	1.715605178	1.562276285	5.32E-08	4.24E-06	2.743083056	Q0P6K6,Anti-Mullerian hormone	NP_001297291.1,muellerian-inhibiting factor precursor	PF00019,Transforming growth factor beta like domain;PF04709,Anti-Mullerian hormone, N terminal region	IPR001839,Transforming growth factor-beta, C-terminal;IPR021203,Muellerian-inhibiting factor;IPR006799,Anti-Mullerian hormone, N-terminal;IPR017948,Transforming growth factor beta, conserved site;IPR029034,Cystine-knot cytokine	-	GO:0008083,molecular_function,growth factor activity;GO:0010469,biological_process,regulation of signaling receptor activity;GO:0008406,biological_process,gonad development;GO:0005576,cellular_component,extracellular region	K04665,ko04024,cAMP signaling pathway;K04665,ko04060,Cytokine-cytokine receptor interaction;K04665,ko04350,TGF-beta signaling pathway;K04665,ko04390,Hippo signaling pathway
LGR6	NC_040072.1;NC_040072.1;NC_040072.1;NC_040072.1;NC_040072.1;NC_040072.1;NC_040072.1;NC_040072.1;NC_040072.1;NC_040072.1;NC_040072.1;NC_040072.1;NC_040072.1;NC_040072.1;NC_040072.1;NC_040072.1;NC_040072.1;NC_040072.1	2414936;2461783;2472069;2482709;2498980;2508154;2520907;2522459;2523380;2523616;2524674;2527573;2529813;2531079;2531486;2533722;2538712;2539186	2415154;2461854;2472140;2482780;2499195;2508225;2520975;2522530;2523451;2523684;2524745;2527638;2529884;2531150;2531611;2533882;2538792;2541711	+;+;+;+;+;+;+;+;+;+;+;+;+;+;+;+;+;+	4181	0.018203068	0.049680464	0.061426757	2.604046315	2.943479738	2.225343737	5.46E-08	4.33E-06	-5.584757371	U3IGI3,Leucine rich repeat containing G protein-coupled receptor 6	-	PF13855,Leucine rich repeat	IPR001611,Leucine-rich repeat;IPR032675,Leucine-rich repeat domain superfamily;IPR002131,Glycoprotein hormone receptor family;IPR003591,Leucine-rich repeat, typical subtype;IPR017452,GPCR, rhodopsin-like, 7TM;IPR000276,G protein-coupled receptor, rhodopsin-like	-	GO:0016020,cellular_component,membrane;GO:0016500,molecular_function,protein-hormone receptor activity;GO:0030177,biological_process,positive regulation of Wnt signaling pathway;GO:0007186,biological_process,G-protein coupled receptor signaling pathway;GO:0004930,molecular_function,G-protein coupled receptor activity;GO:0031982,cellular_component,vesicle;GO:0016021,cellular_component,integral com…	-
GAS2	NC_040050.1;NC_040050.1;NC_040050.1;NC_040050.1;NC_040050.1;NC_040050.1;NC_040050.1;NC_040050.1;NC_040050.1	59532934;59542296;59550192;59550292;59566766;59577290;59581866;59585959;59621427	59533132;59542457;59550289;59550315;59566907;59577353;59582010;59586066;59622825	+;+;+;+;+;+;+;+;+	2341	3.592407776	4.406861616	5.576798203	41.83850228	32.95107525	45.99728125	5.58E-08	4.39E-06	-2.844115668	U3HZV9,Growth arrest specific 2	-	PF02187,rowth-Arrest-Specific Protein 2 Domain;PF00307,Calponin homology (CH) domain	IPR029929,Growth arrest-specific protein 2;IPR003108,GAR domain;IPR036534,GAR domain superfamily;IPR036872,CH domain superfamily;IPR001715,Calponin homology domain	-	GO:0005856,cellular_component,cytoskeleton;GO:0006915,biological_process,apoptotic process;GO:0008017,molecular_function,microtubule binding	-
LOC106015458	NC_040047.1;NC_040047.1	102788680;102790569	102788904;102794470	+;+	4127	3.75279385	4.7394565	5.082157444	0.67807078	0.859364233	0.689942926	5.56E-08	4.39E-06	2.909456131	-	-	-	-	-	-	-
AQP4	NC_040047.1;NC_040047.1;NC_040047.1;NC_040047.1;NC_040047.1;NC_040047.1;NC_040047.1;NC_040047.1;NC_040047.1;NC_040047.1	114422753;114422938;114426886;114426886;114428207;114428207;114428750;114428750;114430975;114430975	114422901;114423092;114427300;114427300;114428371;114428371;114428830;114428830;114435659;114435659	+;+;+;+;+;+;+;+;+;+	5650	8.021546059	10.0915927	5.197113147	0.448858104	0.389184007	0.42588475	5.64E-08	4.41E-06	4.520191561	U3I8G8,Aquaporin 4	-	PF00230,Major intrinsic protein	IPR023271,Aquaporin-like;IPR000425,Major intrinsic protein;IPR034294,Aquaporin transporter;IPR022357,Major intrinsic protein, conserved site	-	GO:0015267,molecular_function,channel activity;GO:0055085,biological_process,transmembrane transport;GO:0050891,biological_process,multicellular organismal water homeostasis;GO:0009897,cellular_component,external side of plasma membrane;GO:0005737,cellular_component,cytoplasm;GO:0005886,cellular_component,plasma membrane;GO:0071346,biological_process,cellular response to interferon-gamma;GO:00160…	-
DACT2	NC_040048.1;NC_040048.1;NC_040048.1;NC_040048.1	43905839;43911061;43912809;43916566	43906236;43911193;43913096;43919190	+;+;+;+	3444	2.121450261	2.141070774	2.436012053	10.90585065	13.77858799	13.26324731	5.70E-08	4.42E-06	-2.187464607	U3J939,Dishevelled binding antagonist of beta catenin 2	-	PF15268,apper	IPR024843,Dapper;IPR024853,Dact2	-	-	-
DYDC1	NC_040051.1;NC_040051.1;NC_040051.1;NC_040051.1;NC_040051.1;NC_040051.1;NC_040051.1;NC_040051.1;NC_040051.1;NC_040051.1;NC_040051.1;NC_040051.1;NC_040051.1;NC_040051.1;NC_040051.1;NC_040051.1;NC_040051.1;NC_040051.1;NC_040051.1;NC_040051.1;NC_040051.1;NC_040051.1;NC_040051.1;NC_040051.1;NC_040051.1;NC_040051.1;NC_040051.1;NC_040051.1;NC_040051.1;NC_040051.1;NC_040051.1;NC_040051.1;NC_040051.1;NC_…	26676457;26676457;26676457;26676457;26676457;26692606;26692606;26692606;26692606;26692606;26692762;26694211;26694211;26694211;26694211;26694211;26694211;26695203;26695203;26695203;26695203;26695203;26695203;26696697;26696697;26696697;26696697;26696697;26696697;26697015;26697015;26697015;26697015;26697015;26697015;26697471;26697579;26698136;26698136;26698136;26698200	26679098;26679098;26679098;26679098;26679098;26692664;26692664;26692664;26692664;26692664;26694021;26694303;26694303;26694303;26694303;26694303;26694303;26695283;26695283;26695283;26695283;26695283;26695283;26696819;26696819;26696819;26696819;26696819;26696819;26697170;26697167;26697167;26697167;26697167;26697167;26697490;26697632;26698285;26698285;26698285;26698220	-;-;-;-;-;-;-;-;-;-;-;-;-;-;-;-;-;-;-;-;-;-;-;-;-;-;-;-;-;-;-;-;-;-;-;-;-;-;-;-;-	4638	61.60927921	74.61970202	68.45166856	24.50219884	20.24113868	20.33742009	5.75E-08	4.42E-06	1.961274655	A0A1V4KJT6,DPY30 domain-containing protein 1	-	-	IPR007858,Dpy-30 motif	-	-	-
TMOD4	NC_040071.1;NC_040071.1;NC_040071.1;NC_040071.1;NC_040071.1;NC_040071.1;NC_040071.1;NC_040071.1;NC_040071.1;NC_040071.1;NC_040071.1;NC_040071.1;NC_040071.1;NC_040071.1;NC_040071.1;NC_040071.1;NC_040071.1;NC_040071.1;NC_040071.1;NC_040071.1	808213;808218;808458;808458;808692;808692;809021;809021;809604;809604;809890;809890;810243;810243;810719;810719;810959;810959;811649;812375	808345;808345;808602;808602;808835;808835;809128;809128;809734;809734;809979;809979;810365;810365;810875;810875;811102;811102;811802;812451	-;-;-;-;-;-;-;-;-;-;-;-;-;-;-;-;-;-;-;-	1406	23.57369185	25.7057181	24.0202867	6.748448499	7.264720506	5.904380145	5.75E-08	4.42E-06	2.189672943	H9KZU7,Tropomodulin 4	-	PF03250,Tropomodulin	IPR004934,Tropomodulin;IPR032675,Leucine-rich repeat domain superfamily;IPR030129,Tropomodulin-4	-	GO:0005523,molecular_function,tropomyosin binding;GO:0005865,cellular_component,striated muscle thin filament;GO:0005623,cellular_component,cell;GO:0016020,cellular_component,membrane;GO:0051015,molecular_function,actin filament binding;GO:0051694,biological_process,pointed-end actin filament capping	-
PKP3	NC_040050.1;NC_040050.1;NC_040050.1;NC_040050.1;NC_040050.1;NC_040050.1;NC_040050.1;NC_040050.1;NC_040050.1;NC_040050.1;NC_040050.1;NC_040050.1;NC_040050.1;NC_040050.1	35735015;35736431;35736884;35737359;35737725;35738264;35738624;35738943;35739361;35739749;35740248;35741180;35742284;35745066	35736187;35736518;35737076;35737512;35737910;35738431;35738741;35739117;35739565;35739872;35740972;35741256;35742491;35745212	-;-;-;-;-;-;-;-;-;-;-;-;-;-	3741	0.020344033	0.027761831	0.068651502	3.728485853	2.948386569	2.755083092	5.88E-08	4.50E-06	-6.033213167	A0A226P2W6,Uncharacterized protein	-	-	IPR000225,Armadillo;IPR016024,Armadillo-type fold;IPR011989,Armadillo-like helical;IPR028434,Plakophilin-3;IPR028435,Plakophilin/Delta catenin	-	GO:0098609,biological_process,cell-cell adhesion;GO:0007155,biological_process,cell adhesion;GO:0005634,cellular_component,nucleus;GO:0030057,cellular_component,desmosome	-
COL2A1	NC_040073.1;NC_040073.1;NC_040073.1;NC_040073.1;NC_040073.1;NC_040073.1;NC_040073.1;NC_040073.1;NC_040073.1;NC_040073.1;NC_040073.1;NC_040073.1;NC_040073.1;NC_040073.1;NC_040073.1;NC_040073.1;NC_040073.1;NC_040073.1;NC_040073.1;NC_040073.1;NC_040073.1;NC_040073.1;NC_040073.1;NC_040073.1;NC_040073.1;NC_040073.1;NC_040073.1;NC_040073.1;NC_040073.1;NC_040073.1;NC_040073.1	6164580;6165138;6165340;6165498;6166684;6166826;6167024;6167209;6167545;6167684;6167883;6168089;6168227;6168382;6168533;6168723;6168948;6169090;6169406;6169667;6170096;6170404;6170540;6171176;6171342;6171601;6171820;6172010;6172418;6173685;6174145	6164715;6165245;6165393;6165596;6166737;6166924;6167077;6167262;6167646;6167782;6167990;6168142;6168280;6168435;6168586;6168830;6169001;6169143;6169567;6169774;6170203;6170457;6170647;6171229;6171449;6171654;6171927;6172298;6172605;6173966;6174264	+;+;+;+;+;+;+;+;+;+;+;+;+;+;+;+;+;+;+;+;+;+;+;+;+;+;+;+;+;+;+	3142	38.59851982	49.70284048	53.98888965	966.0407382	587.7958309	691.0498526	5.93E-08	4.52E-06	-3.67672749	Q90W37,Alpha 1 type IIA collagen	NP_989757.1,collagen alpha-1(II) chain precursor	PF01391,Collagen triple helix repeat (20 copies);PF01410,ibrillar collagen C-terminal domain	IPR008160,Collagen triple helix repeat;IPR000885,Fibrillar collagen, C-terminal	ENOG410YF8Q,-	GO:0005201,molecular_function,extracellular matrix structural constituent;GO:0005581,cellular_component,collagen trimer	K19719,ko04512,ECM-receptor interaction;K19719,ko04151,PI3K-Akt signaling pathway;K19719,ko04974,Protein digestion and absorption;K19719,ko04510,Focal adhesion
CCDC69	NC_040059.1;NC_040059.1;NC_040059.1;NC_040059.1;NC_040059.1;NC_040059.1;NC_040059.1;NC_040059.1;NC_040059.1;NC_040059.1;NC_040059.1;NC_040059.1;NC_040059.1;NC_040059.1;NC_040059.1;NC_040059.1;NC_040059.1;NC_040059.1;NC_040059.1;NC_040059.1;NC_040059.1;NC_040059.1;NC_040059.1;NC_040059.1	7879842;7881065;7881896;7882326;7882326;7882326;7882694;7882694;7882694;7883082;7883082;7883082;7883345;7883345;7883345;7883590;7883590;7883590;7883789;7883789;7883789;7884280;7884280;7884280	7882195;7882218;7882199;7882423;7882423;7882423;7882813;7882813;7882813;7883183;7883183;7883183;7883418;7883418;7883418;7883677;7883677;7883677;7883955;7883955;7883955;7887638;7887643;7887646	-;-;-;-;-;-;-;-;-;-;-;-;-;-;-;-;-;-;-;-;-;-;-;-	6393	34.98804248	29.52876992	32.13161463	6.5180505	4.421456538	5.965750672	5.98E-08	4.53E-06	2.836213586	G1N3E6,Coiled-coil domain containing 69	-	-	-	ENOG410IYDA,-;ENOG4111TAG,-	-	-
FBN3	NC_040065.1;NC_040065.1;NC_040065.1;NC_040065.1;NC_040065.1;NC_040065.1;NC_040065.1;NC_040065.1;NC_040065.1;NC_040065.1;NC_040065.1;NC_040065.1;NC_040065.1;NC_040065.1;NC_040065.1;NC_040065.1;NC_040065.1;NC_040065.1;NC_040065.1;NC_040065.1;NC_040065.1;NC_040065.1;NC_040065.1;NC_040065.1;NC_040065.1;NC_040065.1;NC_040065.1;NC_040065.1;NC_040065.1;NC_040065.1;NC_040065.1;NC_040065.1;NC_040065.1;NC_…	2079288;2079348;2079406;2079496;2082421;2082530;2104080;2106417;2111060;2114701;2134024;2135995;2145511;2154256;2155084;2155927;2157738;2158329;2158893;2159700;2160353;2163715;2164132;2165802;2166731;2166957;2167533;2168379;2168748;2169142;2172248;2173310;2173812;2174744;2175014;2175484;2176075;2176554;2177252;2178296;2178527;2179197;2179374;2179829;2180374;2180970;2182069;2182706;2184260;2184626…	2079346;2079403;2079494;2079589;2082527;2082723;2104162;2106515;2111155;2114796;2134221;2136120;2145636;2154408;2155281;2156070;2157857;2158454;2159015;2159975;2160406;2163840;2164257;2165921;2166868;2167007;2167658;2168606;2168873;2169270;2172373;2173435;2173934;2174869;2175139;2175606;2176197;2176679;2177374;2178418;2178688;2179265;2179499;2179954;2180523;2181041;2182194;2182831;2184385;2184742…	+;+;+;+;+;+;+;+;+;+;+;+;+;+;+;+;+;+;+;+;+;+;+;+;+;+;+;+;+;+;+;+;+;+;+;+;+;+;+;+;+;+;+;+;+;+;+;+;+;+;+;+;+;+;+;+;+;+;+;+;+;+;+;+;+;+;+;+;+	9237	11.17670062	12.88515038	13.82784107	45.70364727	51.24652958	58.10477458	6.05E-08	4.56E-06	-1.718641312	A0A1D5NW86,Fibrillin 3	-	-	IPR024731,EGF domain;IPR018097,EGF-like calcium-binding, conserved site;IPR011398,Fibrillin;IPR009030,Growth factor receptor cysteine-rich domain superfamily;IPR001881,EGF-like calcium-binding domain;IPR026823,Complement Clr-like EGF domain;IPR000152,EGF-type aspartate/asparagine hydroxylation site;IPR000742,EGF-like domain;IPR013032,EGF-like, conserved site;IPR017878,TB domain;IPR036773,TGF-beta…	-	GO:0005578,,;GO:0005201,molecular_function,extracellular matrix structural constituent;GO:0005509,molecular_function,calcium ion binding	-
TCF7	NC_040059.1;NC_040059.1;NC_040059.1;NC_040059.1;NC_040059.1;NC_040059.1;NC_040059.1;NC_040059.1;NC_040059.1;NC_040059.1;NC_040059.1	4568946;4569473;4615643;4617471;4619921;4621743;4622054;4622714;4626634;4628399;4631989	4569241;4569603;4615775;4617561;4620007;4621853;4622216;4622821;4626682;4628471;4632419	+;+;+;+;+;+;+;+;+;+;+	1673	0.750607271	0.310391544	0.486120755	27.57312841	19.94827864	23.68374028	6.08E-08	4.56E-06	-5.205301892	U3JZP8,Transcription factor 7	-	PF08347,N-terminal CTNNB1 binding;PF00505,HMG (high mobility group) box	IPR027397,Catenin binding domain superfamily;IPR009071,High mobility group box domain;IPR028785,Transcription factor 7;IPR036910,High mobility group box domain superfamily;IPR024940,Transcription factor TCF/LEF;IPR013558,CTNNB1 binding, N-teminal	-	GO:0003677,molecular_function,DNA binding;GO:0033153,biological_process,T cell receptor V(D)J recombination;GO:0006357,biological_process,regulation of transcription by RNA polymerase II;GO:0016055,biological_process,Wnt signaling pathway;GO:0008013,molecular_function,beta-catenin binding;GO:0071353,biological_process,cellular response to interleukin-4;GO:0060070,biological_process,canonical Wnt …	-
AMH	NC_040065.1;NC_040065.1;NC_040065.1;NC_040065.1;NC_040065.1	526558;529094;529373;530562;531075	528893;529277;529499;531072;531178	-;-;-;-;-	3262	6.766106115	5.826435598	5.87869003	1.11256056	1.261205267	1.118785224	6.15E-08	4.57E-06	2.718957688	Q0P6K6,Anti-Mullerian hormone	NP_001297291.1,muellerian-inhibiting factor precursor	PF00019,Transforming growth factor beta like domain;PF04709,Anti-Mullerian hormone, N terminal region	IPR001839,Transforming growth factor-beta, C-terminal;IPR021203,Muellerian-inhibiting factor;IPR006799,Anti-Mullerian hormone, N-terminal;IPR017948,Transforming growth factor beta, conserved site;IPR029034,Cystine-knot cytokine	-	GO:0008083,molecular_function,growth factor activity;GO:0010469,biological_process,regulation of signaling receptor activity;GO:0008406,biological_process,gonad development;GO:0005576,cellular_component,extracellular region	K04665,ko04024,cAMP signaling pathway;K04665,ko04060,Cytokine-cytokine receptor interaction;K04665,ko04350,TGF-beta signaling pathway;K04665,ko04390,Hippo signaling pathway
DAAM2	NC_040048.1;NC_040048.1;NC_040048.1;NC_040048.1;NC_040048.1;NC_040048.1;NC_040048.1;NC_040048.1;NC_040048.1;NC_040048.1;NC_040048.1;NC_040048.1;NC_040048.1;NC_040048.1;NC_040048.1;NC_040048.1;NC_040048.1;NC_040048.1;NC_040048.1;NC_040048.1;NC_040048.1;NC_040048.1;NC_040048.1;NC_040048.1;NC_040048.1;NC_040048.1;NC_040048.1;NC_040048.1;NC_040048.1;NC_040048.1;NC_040048.1;NC_040048.1;NC_040048.1;NC_…	34190684;34201872;34201872;34201872;34201902;34202212;34203199;34203244;34203244;34205428;34205428;34207770;34219592;34219592;34219592;34219592;34219592;34219592;34219592;34219592;34227860;34227860;34268117;34268117;34268117;34268117;34268117;34268117;34268117;34268117;34279067;34279067;34279067;34279067;34279067;34279067;34279067;34279067;34279067;34279067;34300110;34300110;34300110;34300110;343…	34190765;34202025;34202025;34202025;34202025;34202271;34203338;34203338;34203338;34205506;34205506;34207869;34219726;34219726;34219726;34219726;34219726;34219726;34219726;34219726;34228107;34228107;34268156;34268156;34268156;34268156;34268156;34268156;34268156;34268156;34279269;34279269;34279269;34279269;34279269;34279269;34279269;34279269;34279269;34279269;34300199;34300199;34300199;34300199;343…	+;+;+;+;+;+;+;+;+;+;+;+;+;+;+;+;+;+;+;+;+;+;+;+;+;+;+;+;+;+;+;+;+;+;+;+;+;+;+;+;+;+;+;+;+;+;+;+;+;+;+;+;+;+;+;+;+;+;+;+;+;+;+;+;+;+;+;+;+;+;+;+;+;+;+;+;+;+;+;+;+;+;+;+;+;+;+;+;+;+;+;+;+;+;+;+;+;+;+;+;+;+;+;+;+;+;+;+;+;+;+;+;+;+;+;+;+;+;+;+;+;+;+;+;+;+;+;+;+;+;+;+;+;+;+;+;+;+;+;+;+;+;+;+;+;+;+;+;+;+;+;+;+;+;+;+;+;+;+;+;+;+;+;+;+;+;+;+;+;+;+;+;+;+;+;+;+;+;+;+;+;+;+;+;+;+;+;+;+;+;+;+;+;+;+;+;+;+;+;+…	10361	2.626026691	2.556079305	2.908422459	10.93440773	11.07690887	13.81833855	6.16E-08	4.57E-06	-1.828413814	A0A0Q3LVS0,Disheveled-associated activator of morphogenesis 2 isoform X2	-	PF02181,ormin Homology 2 Domain;PF06367,iaphanous FH3 Domain;PF06371,iaphanous GTPase-binding Domain	IPR014768,Rho GTPase-binding/formin homology 3 (GBD/FH3) domain;IPR011989,Armadillo-like helical;IPR010473,Formin, GTPase-binding domain;IPR010472,Formin, FH3 domain;IPR016024,Armadillo-type fold;IPR014767,Diaphanous autoregulatory (DAD) domain;IPR015425,Formin, FH2 domain	-	GO:0030036,biological_process,actin cytoskeleton organization;GO:0017048,molecular_function,Rho GTPase binding;GO:0003779,molecular_function,actin binding;GO:0016043,biological_process,cellular component organization	-
DUSP26	NC_040068.1;NC_040068.1;NC_040068.1;NC_040068.1;NC_040068.1;NC_040068.1;NC_040068.1;NC_040068.1;NC_040068.1;NC_040068.1;NC_040068.1;NC_040068.1;NC_040068.1;NC_040068.1;NC_040068.1;NC_040068.1;NC_040068.1;NC_040068.1;NC_040068.1;NC_040068.1;NC_040068.1	809490;809490;809490;809490;809490;810699;810699;810699;810699;810699;811244;811244;811244;811244;811244;813407;813407;813407;820833;820833;820833	810246;810246;810246;810246;810246;810907;810907;810907;810907;810907;811516;811516;811405;811405;811516;813812;813821;813580;820945;820946;820867	-;-;-;-;-;-;-;-;-;-;-;-;-;-;-;-;-;-;-;-;-	1768	14.4637791	18.44519304	13.77578988	2.003236769	2.467371785	3.062251064	6.23E-08	4.60E-06	2.945239068	G1MS40,Dual specificity phosphatase 26	-	PF00782,ual specificity phosphatase, catalytic domain	IPR029021,Protein-tyrosine phosphatase-like;IPR016130,Protein-tyrosine phosphatase, active site;IPR000340,Dual specificity phosphatase, catalytic domain;IPR020405,Atypical dual specificity phosphatase, subfamily A;IPR003595,Protein-tyrosine phosphatase, catalytic;IPR020422,Dual specificity protein phosphatase domain;IPR000387,Tyrosine specific protein phosphatases domain;IPR020417,Atypical dual s…	COG2453,Predicted protein-tyrosine phosphatase;KOG1716,Dual specificity phosphatase	GO:0005794,cellular_component,Golgi apparatus;GO:0008138,molecular_function,protein tyrosine/serine/threonine phosphatase activity;GO:0004725,molecular_function,protein tyrosine phosphatase activity;GO:0004721,molecular_function,phosphoprotein phosphatase activity;GO:0035335,biological_process,peptidyl-tyrosine dephosphorylation;GO:0005737,cellular_component,cytoplasm;GO:0045785,biological_proces…	-
ASB12	NC_040055.1;NC_040055.1;NC_040055.1;NC_040055.1;NC_040055.1;NC_040055.1	3739210;3739211;3741268;3741268;3743003;3743003	3739485;3739413;3742112;3742112;3743861;3743861	+;+;+;+;+;+	1980	51.08395977	53.81681453	64.48735542	19.65415339	21.40496186	22.80670193	6.41E-08	4.70E-06	1.720783144	U3I9D3,Ankyrin repeat and SOCS box containing 12	-	PF12796,Ankyrin repeats (3 copies);PF07525,SOCS box;PF00023,Ankyrin repeat	IPR020683,Ankyrin repeat-containing domain;IPR002110,Ankyrin repeat;IPR001496,SOCS box domain;IPR036770,Ankyrin repeat-containing domain superfamily	-	GO:0061630,molecular_function,ubiquitin protein ligase activity;GO:0000151,cellular_component,ubiquitin ligase complex;GO:0016567,biological_process,protein ubiquitination	-
LOC113843675	NC_040046.1;NC_040046.1	175230106;175231997	175231196;175240964	+;+	10059	0.764172367	0.85695714	0.868084223	0.104324415	0.126928584	0.103659194	6.43E-08	4.70E-06	3.195017506	R0KB83,Uncharacterized protein	-	-	-	-	-	-
ACTN2	NC_040048.1;NC_040048.1;NC_040048.1;NC_040048.1;NC_040048.1;NC_040048.1;NC_040048.1;NC_040048.1;NC_040048.1;NC_040048.1;NC_040048.1;NC_040048.1;NC_040048.1;NC_040048.1;NC_040048.1;NC_040048.1;NC_040048.1;NC_040048.1;NC_040048.1;NC_040048.1;NC_040048.1	24842024;24864543;24865469;24873006;24874170;24876288;24879742;24883198;24884718;24885878;24887200;24888988;24894743;24895677;24896181;24898108;24898699;24899831;24907287;24908342;24909909	24842478;24864657;24865588;24873092;24874257;24876366;24879823;24883283;24884810;24886108;24887347;24889138;24894851;24895817;24896363;24898242;24898878;24899977;24907352;24908500;24911271	+;+;+;+;+;+;+;+;+;+;+;+;+;+;+;+;+;+;+;+;+	4218	585.2374244	518.6612867	510.6264411	158.3863973	155.6113222	153.6565016	6.47E-08	4.71E-06	2.106230407	R0JMH7,Alpha-actinin-2	XP_005023651.1,alpha-actinin-2	PF00435,Spectrin repeat;PF08726,Ca2+ insensitive EF hand;PF00307,Calponin homology (CH) domain	IPR001715,Calponin homology domain;IPR002017,Spectrin repeat;IPR018159,Spectrin/alpha-actinin;IPR036872,CH domain superfamily;IPR002048,EF-hand domain;IPR014837,EF-hand, Ca insensitive;IPR011992,EF-hand domain pair;IPR001589,Actinin-type actin-binding domain, conserved site	-	GO:0003779,molecular_function,actin binding;GO:0005509,molecular_function,calcium ion binding	-
SHROOM3	NC_040049.1;NC_040049.1;NC_040049.1;NC_040049.1;NC_040049.1;NC_040049.1;NC_040049.1;NC_040049.1;NC_040049.1;NC_040049.1;NC_040049.1;NC_040049.1	15715165;15755603;15824179;15824276;15833095;15836559;15842781;15846217;15848187;15849526;15854176;15855055	15715377;15755757;15824273;15824306;15833226;15839814;15842857;15847116;15848702;15849676;15854448;15856051	+;+;+;+;+;+;+;+;+;+;+;+	6796	43.7481026	41.53159734	48.96408805	14.06456525	16.92408983	16.11601327	6.63E-08	4.80E-06	1.827069742	U3IRI1,Shroom family member 3	-	PF08688,Apx/Shroom domain ASD1;PF08687,Apx/Shroom domain ASD2	IPR030494,Shroom3;IPR014799,Apx/Shrm Domain 2;IPR027685,Shroom family;IPR014800,Apx/Shrm Domain 1	-	GO:0001843,biological_process,neural tube closure;GO:0051015,molecular_function,actin filament binding;GO:0000902,biological_process,cell morphogenesis;GO:0003779,molecular_function,actin binding;GO:0002064,biological_process,epithelial cell development	-
MYADML2	NC_040064.1;NC_040064.1;NC_040064.1;NC_040064.1;NC_040064.1;NC_040064.1;NC_040064.1	351714;351714;354060;354744;354744;355747;356285	353965;354662;354662;354884;354884;355857;356446	-;-;-;-;-;-;-	3363	18.74953101	15.74994807	15.04447765	3.367459812	2.752487678	2.611599242	6.67E-08	4.81E-06	2.823799759	U3I332,Myeloid associated differentiation marker like 2	-	PF01284,Membrane-associating domain	IPR008253,Marvel domain	-	GO:0005737,cellular_component,cytoplasm;GO:0016021,cellular_component,integral component of membrane;GO:0016020,cellular_component,membrane	-
APOBEC2	NC_040072.1;NC_040072.1;NC_040072.1	5624901;5632914;5634034	5625273;5633461;5634678	+;+;+	1566	155.3244328	176.2120542	148.3934009	62.62778336	53.58395012	63.07567989	6.75E-08	4.82E-06	1.734824954	R0L7B9,Apolipoprotein B mRNA editing enzyme catalytic subunit 2	-	PF08210,APOBEC-like N-terminal domain	IPR016193,Cytidine deaminase-like;IPR002125,Cytidine and deoxycytidylate deaminase domain;IPR013158,APOBEC-like, N-terminal	-	GO:0016556,biological_process,mRNA modification;GO:0016814,molecular_function,hydrolase activity, acting on carbon-nitrogen (but not peptide) bonds, in cyclic amidines;GO:0003824,molecular_function,catalytic activity;GO:0016554,biological_process,cytidine to uridine editing;GO:0009972,biological_process,cytidine deamination;GO:0080111,biological_process,DNA demethylation;GO:0042802,molecular_func…	-
LOC113845534	NC_040064.1;NC_040064.1	8388585;8390411	8390070;8391215	-;-	2291	0.066440007	0.105776091	0.074734547	2.557462262	2.414967289	2.503227001	6.73E-08	4.82E-06	-4.565752555	-	-	-	-	-	-	-
CAVIN4	NC_040047.1;NC_040047.1	93201617;93213000	93202206;93215106	+;+	2697	221.9858867	178.8712695	165.0588812	31.72775943	31.82336961	25.75468411	6.80E-08	4.83E-06	2.982888366	U3IQ60,Caveolae associated protein 4	XP_005010670.1,muscle-related coiled-coil protein	PF15237,PTRF/SDPR family	IPR026752,Cavin family;IPR033299,Caveolae-associated protein 4	-	GO:0010468,biological_process,regulation of gene expression;GO:0005901,cellular_component,caveola;GO:0035023,biological_process,regulation of Rho protein signal transduction;GO:0005886,cellular_component,plasma membrane	-
CLIC3	NC_040063.1;NC_040063.1;NC_040063.1;NC_040063.1;NC_040063.1;NC_040063.1;NC_040063.1;NC_040063.1;NC_040063.1;NC_040063.1;NC_040063.1	260806;260806;262167;262167;262680;262680;262924;263342;263342;264247;264247	261751;261751;262342;262342;262786;262786;263049;263451;263451;264367;264367	-;-;-;-;-;-;-;-;-;-;-	1586	9.045507438	12.7474767	12.01000898	1.957423016	2.34799874	2.174625892	6.86E-08	4.85E-06	2.686470946	U3IBD3,Chloride intracellular channel 3	XP_005014861.1,chloride intracellular channel protein 3 isoform X1	PF13410,lutathione S-transferase, C-terminal domain;PF13417,lutathione S-transferase, N-terminal domain	IPR004045,Glutathione S-transferase, N-terminal;IPR036282,Glutathione S-transferase, C-terminal domain superfamily;IPR002946,Intracellular chloride channel;IPR030261,Chloride intracellular channel protein 3;IPR036249,Thioredoxin-like superfamily	-	GO:1902476,biological_process,chloride transmembrane transport;GO:0006821,biological_process,chloride transport;GO:0005737,cellular_component,cytoplasm;GO:0005254,molecular_function,chloride channel activity;GO:0016604,cellular_component,nuclear body;GO:0005634,cellular_component,nucleus	-
ALX4	NC_040050.1;NC_040050.1;NC_040050.1;NC_040050.1;NC_040050.1;NC_040050.1;NC_040050.1;NC_040050.1;NC_040050.1	56388316;56388316;56389170;56389170;56392862;56392862;56418250;56418250;56419673	56389032;56389032;56389298;56389298;56393172;56393172;56418981;56418657;56420400	-;-;-;-;-;-;-;-;-	2617	0.029081784	0.132285073	0.032712428	5.496948904	6.17977785	6.252385206	6.91E-08	4.86E-06	-6.126710393	U3KCT6,ALX homeobox 4	XP_005046969.1,homeobox protein aristaless-like 4	PF03826,OAR domain;PF00046,Homeobox domain	IPR017970,Homeobox, conserved site;IPR033203,Homeobox protein aristaless-like 4;IPR001356,Homeobox domain;IPR009057,Homeobox-like domain superfamily;IPR003654,OAR domain	-	GO:0048565,biological_process,digestive tract development;GO:0006355,biological_process,regulation of transcription, DNA-templated;GO:0046982,molecular_function,protein heterodimerization activity;GO:0048705,biological_process,skeletal system morphogenesis;GO:0005634,cellular_component,nucleus;GO:0060021,biological_process,roof of mouth development;GO:0003700,molecular_function,DNA binding transc…	-
CACNG1	NC_040064.1;NC_040064.1;NC_040064.1;NC_040064.1	9348575;9350320;9352472;9359149	9349571;9350457;9352546;9359532	-;-;-;-	1594	74.72239584	79.05468804	75.96807724	19.31140477	19.17920902	14.11444581	6.96E-08	4.87E-06	2.435558832	A0A091LNI6,Multifunctional fusion protein	-	PF13903,PMP-22/EMP/MP20/Claudin tight junction	IPR004031,PMP-22/EMP/MP20/Claudin superfamily;IPR008368,Voltage-dependent calcium channel, gamma subunit;IPR005421,Voltage-dependent calcium channel, gamma-1 subunit	-	GO:0005262,molecular_function,calcium channel activity;GO:0005245,molecular_function,voltage-gated calcium channel activity;GO:0006811,biological_process,ion transport;GO:0005891,cellular_component,voltage-gated calcium channel complex;GO:0005244,molecular_function,voltage-gated ion channel activity;GO:0016020,cellular_component,membrane;GO:0034765,biological_process,regulation of ion transmembra…	-
COQ8A	NC_040048.1;NC_040048.1;NC_040048.1;NC_040048.1;NC_040048.1;NC_040048.1;NC_040048.1;NC_040048.1;NC_040048.1;NC_040048.1;NC_040048.1;NC_040048.1;NC_040048.1;NC_040048.1	21023117;21025038;21025639;21026469;21027735;21028507;21029587;21031836;21033014;21036125;21040369;21044684;21046006;21050046	21024527;21025124;21025704;21026576;21027876;21028600;21029668;21031976;21033099;21036247;21040443;21044750;21046413;21050240	-;-;-;-;-;-;-;-;-;-;-;-;-;-	3085	59.43009098	54.07746446	48.81206387	17.63172229	16.75005073	17.21163403	6.99E-08	4.88E-06	1.972690986	R0LC92,Chaperone activity of bc1 complex-like, mitochondrial	XP_005022606.1,atypical kinase COQ8A, mitochondrial	PF03109,ABC1 family	IPR034640,Atypical kinase COQ8A;IPR004147,UbiB domain;IPR034646,UbiB domain, ADCK3-like;IPR011009,Protein kinase-like domain superfamily	-	GO:0006744,biological_process,ubiquinone biosynthetic process;GO:0005739,cellular_component,mitochondrion	-
e08f4ab5-f763-4d64-a55f-f083293af747	NW_020866758.1	13913	14557	+	645	0.707972354	0.483055863	0.66363119	19.32033578	13.47156693	17.4095523	7.04E-08	4.88E-06	-4.43560835	-	-	-	-	-	-	-
EPYC	NC_040046.1;NC_040046.1;NC_040046.1;NC_040046.1;NC_040046.1;NC_040046.1;NC_040046.1	154788281;154790636;154792281;154793800;154797703;154809234;154811502	154789142;154790731;154792483;154793958;154797856;154809414;154811607	-;-;-;-;-;-;-	1761	0.129654222	0	0.072920293	27.56088428	17.70277145	21.77147347	7.06E-08	4.88E-06	-8.051253349	U3J1W5,Epiphycan	-	PF13855,Leucine rich repeat;PF00560,Leucine Rich Repeat	IPR001611,Leucine-rich repeat;IPR003591,Leucine-rich repeat, typical subtype;IPR027217,Epiphycan;IPR032675,Leucine-rich repeat domain superfamily	-	-	-
CHST11	NC_040046.1;NC_040046.1;NC_040046.1;NC_040046.1;NC_040046.1;NC_040046.1	145743599;145743599;145816187;145816187;145907499;145907499	145743857;145743842;145816272;145816272;145912425;145912425	+;+;+;+;+;+	5272	0.541353102	0.702623933	0.803796845	5.183631741	5.771964212	5.0054114	7.29E-08	4.90E-06	-2.656585848	A0A1D5PNT7,Carbohydrate sulfotransferase	-	-	IPR018011,Carbohydrate sulfotransferase 8-10;IPR005331,Sulfotransferase	-	GO:0008146,molecular_function,sulfotransferase activity;GO:0005975,biological_process,carbohydrate metabolic process;GO:0005794,cellular_component,Golgi apparatus;GO:0016740,molecular_function,transferase activity;GO:0000139,cellular_component,Golgi membrane;GO:0016051,biological_process,carbohydrate biosynthetic process;GO:0016020,cellular_component,membrane;GO:0016021,cellular_component,integra…	-
EPHA1	NC_040046.1;NC_040046.1;NC_040046.1;NC_040046.1;NC_040046.1;NC_040046.1;NC_040046.1;NC_040046.1;NC_040046.1;NC_040046.1;NC_040046.1;NC_040046.1;NC_040046.1;NC_040046.1;NC_040046.1;NC_040046.1;NC_040046.1;NC_040046.1;NC_040046.1;NC_040046.1;NC_040046.1;NC_040046.1;NC_040046.1;NC_040046.1;NC_040046.1;NC_040046.1;NC_040046.1;NC_040046.1;NC_040046.1;NC_040046.1;NC_040046.1;NC_040046.1;NC_040046.1;NC_…	122102941;122102942;122106674;122106674;122117549;122117549;122119443;122119443;122124830;122124830;122125183;122125183;122126755;122126755;122126988;122126988;122129811;122129811;122131575;122131575;122131910;122131910;122132136;122132136;122132757;122132757;122133200;122133200;122134148;122134148;122135001;122135001;122135507;122135507;122136548;122136548	122103470;122103175;122106741;122106741;122117824;122117824;122119833;122119833;122124985;122124985;122125515;122125515;122126879;122126879;122127147;122127147;122129907;122129907;122131630;122131630;122132032;122132032;122132321;122132321;122132818;122132818;122133409;122133409;122134297;122134297;122135194;122135194;122135662;122135662;122137591;122137591	+;+;+;+;+;+;+;+;+;+;+;+;+;+;+;+;+;+;+;+;+;+;+;+;+;+;+;+;+;+;+;+;+;+;+;+	4317	0.061703636	0.080192271	0.059491608	2.856252414	1.947054198	2.006600836	7.26E-08	4.90E-06	-4.740787866	U3I500,EPH receptor A1	XP_005016481.1,-	PF00536,SAM domain (Sterile alpha motif);PF07714,Protein tyrosine kinase;PF07699,Putative ephrin-receptor like;PF01404,phrin receptor ligand binding domain;PF00041,ibronectin type III domain;PF14575,phrin type-A receptor 2 transmembrane domain	IPR013783,Immunoglobulin-like fold;IPR016257,Ephrin receptor type-A /type-B;IPR001245,Serine-threonine/tyrosine-protein kinase, catalytic domain;IPR013761,Sterile alpha motif/pointed domain superfamily;IPR001090,Ephrin receptor ligand binding domain;IPR036116,Fibronectin type III superfamily;IPR003961,Fibronectin type III;IPR020635,Tyrosine-protein kinase, catalytic domain;IPR008979,Galactose-bin…	-	GO:0006469,biological_process,negative regulation of protein kinase activity;GO:0019901,molecular_function,protein kinase binding;GO:0005005,molecular_function,transmembrane-ephrin receptor activity;GO:0051496,biological_process,positive regulation of stress fiber assembly;GO:0004672,molecular_function,protein kinase activity;GO:0043087,biological_process,regulation of GTPase activity;GO:0016310,…	K05102,ko04360,Axon guidance
LOC106019711	NC_040061.1;NC_040061.1;NC_040061.1;NC_040061.1;NC_040061.1	12310698;12310698;12314387;12314387;12315020	12311857;12311857;12314452;12319647;12319647	-;-;-;-;-	6421	5.956047597	7.602054966	8.019540067	2.431056604	2.308794904	2.335921364	7.15E-08	4.90E-06	1.91603163	-	-	-	-	-	-	-
PTHLH	NC_040046.1;NC_040046.1;NC_040046.1;NC_040046.1;NC_040046.1;NC_040046.1;NC_040046.1;NC_040046.1;NC_040046.1;NC_040046.1;NC_040046.1;NC_040046.1;NC_040046.1;NC_040046.1;NC_040046.1;NC_040046.1;NC_040046.1;NC_040046.1;NC_040046.1;NC_040046.1;NC_040046.1;NC_040046.1;NC_040046.1;NC_040046.1;NC_040046.1	134137776;134137776;134137776;134137776;134137776;134142339;134142343;134142343;134142343;134142343;134142343;134148290;134148290;134148290;134148290;134148290;134148290;134148531;134148548;134148940;134149547;134150811;134150811;134151003;134151003	134138274;134138274;134138274;134138274;134138274;134142765;134142765;134142765;134142765;134142765;134142765;134148412;134148412;134148412;134148412;134148412;134148412;134148923;134148923;134149538;134149993;134150907;134150907;134151508;134151504	-;-;-;-;-;-;-;-;-;-;-;-;-;-;-;-;-;-;-;-;-;-;-;-;-	3091	0.406265275	0.459197394	0.49852851	6.577842531	6.379513046	4.813535631	7.25E-08	4.90E-06	-3.395367719	R0KD54,Parathyroid hormone-related protein	XP_012957017.1,parathyroid hormone-related protein isoform X2	PF01279,Parathyroid hormone family	IPR003626,Parathyroid hormone-related protein;IPR001415,Parathyroid hormone/parathyroid hormone-related protein	-	GO:0005179,molecular_function,hormone activity;GO:0030282,biological_process,bone mineralization;GO:0010469,biological_process,regulation of signaling receptor activity;GO:0005576,cellular_component,extracellular region	-
RUSC2	NC_040075.1;NC_040075.1;NC_040075.1;NC_040075.1;NC_040075.1;NC_040075.1;NC_040075.1;NC_040075.1;NC_040075.1;NC_040075.1	9626585;9626663;9628739;9629653;9632014;9635410;9635721;9636158;9636612;9636933	9626660;9626742;9628913;9629758;9632060;9635662;9636061;9636389;9636785;9638333	+;+;+;+;+;+;+;+;+;+	2885	16.9756924	15.25156099	19.22851247	4.986313789	4.216577101	4.642906477	7.25E-08	4.90E-06	2.209749556	A0A091RA15,Iporin	-	PF14604,Variant SH3 domain;PF02759,RUN domain	IPR001452,SH3 domain;IPR004012,RUN domain;IPR036028,SH3-like domain superfamily;IPR037213,RUN domain superfamily	-	-	-
SFRP2	NC_040049.1;NC_040049.1;NC_040049.1	31581867;31583010;31584587	31582510;31583090;31586221	+;+;+	2360	20.52632347	21.60753905	29.11049149	145.5152195	155.2988349	196.9351537	7.27E-08	4.90E-06	-2.489094392	C7AFG0,Secreted frizzled-related protein 2	-	PF01392,z domain;PF01759,UNC-6/NTR/C345C module	IPR008993,Tissue inhibitor of metalloproteinases-like, OB-fold;IPR015526,Frizzled/secreted frizzled-related protein;IPR026558,Secreted frizzled-related protein 2;IPR036790,Frizzled cysteine-rich domain superfamily;IPR001134,Netrin domain;IPR018933,Netrin module, non-TIMP type;IPR020067,Frizzled domain	-	GO:0016055,biological_process,Wnt signaling pathway;GO:0007275,biological_process,multicellular organism development;GO:0005576,cellular_component,extracellular region	-
073e3dd9-ec1f-4bdc-bba9-9beb6840dc9c	NC_040053.1	25469173	25473283	+	4111	22.73398942	23.19161655	24.17693499	9.636298525	10.9046402	11.3747107	7.53E-08	4.95E-06	1.451232612	R0JWC8,Uncharacterized protein	-	-	-	-	-	-
LAD1	NC_040072.1;NC_040072.1;NC_040072.1;NC_040072.1;NC_040072.1;NC_040072.1;NC_040072.1;NC_040072.1;NC_040072.1;NC_040072.1;NC_040072.1;NC_040072.1;NC_040072.1;NC_040072.1;NC_040072.1;NC_040072.1;NC_040072.1;NC_040072.1;NC_040072.1	2969275;2969276;2972596;2972596;2973234;2973234;2973940;2973940;2974675;2974675;2975300;2975300;2975697;2975697;2976180;2976180;2977281;2977281;2977476	2969678;2969678;2972739;2972739;2973735;2973735;2974083;2974083;2974724;2974724;2975372;2975372;2975828;2975828;2976269;2976269;2977358;2977522;2977663	+;+;+;+;+;+;+;+;+;+;+;+;+;+;+;+;+;+;+	1922	0.712760929	0.432287245	0.579037204	24.22845658	16.77344401	15.29466178	7.41E-08	4.95E-06	-4.716789267	R0K642,Ladinin-1	-	-	IPR006018,Caldesmon/lymphocyte specific protein	-	-	-
LOC101795494	NC_040073.1;NC_040073.1;NC_040073.1;NC_040073.1;NC_040073.1;NC_040073.1;NC_040073.1;NC_040073.1	3293932;3295566;3296103;3296882;3297380;3297735;3298745;3300401	3294774;3295648;3296259;3297043;3297505;3297961;3299139;3300755	+;+;+;+;+;+;+;+	2348	0.324135554	0.28013674	0.291681171	8.063420873	5.014778261	6.814972214	7.52E-08	4.95E-06	-4.149714065	A0A218UMW9,Keratin, type I cytoskeletal 14	-	-	IPR000727,Target SNARE coiled-coil homology domain;IPR001664,Intermediate filament protein;IPR002957,Keratin, type I	-	GO:0005882,cellular_component,intermediate filament;GO:0005198,molecular_function,structural molecule activity	-
MDK	NC_040050.1;NC_040050.1;NC_040050.1;NC_040050.1;NC_040050.1;NC_040050.1;NC_040050.1;NC_040050.1;NC_040050.1;NC_040050.1;NC_040050.1;NC_040050.1;NC_040050.1;NC_040050.1;NC_040050.1	36353012;36353012;36353012;36353497;36353497;36353497;36353734;36353734;36353734;36353972;36353972;36353972;36355507;36356556;36356556	36353372;36353372;36353372;36353658;36353658;36353658;36353895;36353895;36353895;36354051;36354055;36354055;36355656;36356632;36356632	-;-;-;-;-;-;-;-;-;-;-;-;-;-;-	996	69.30629968	85.60904179	80.92402689	385.3592276	333.2589735	472.4719518	7.47E-08	4.95E-06	-2.021789232	A0A091TI35,Midkine	XP_010285660.1,midkine	PF05196,PTN/MK heparin-binding protein family, N-terminal domain;PF01091,PTN/MK heparin-binding protein family, C-terminal domain	IPR020089,Pleiotrophin/Midkine, N-terminal domain;IPR020092,Pleiotrophin/Midkine heparin-binding growth factor, conserved site;IPR020091,Pleiotrophin/Midkine disulphide-rich domain superfamily;IPR037122,Pleiotrophin/Midkine, N-terminal domain superfamily;IPR000762,Midkine heparin-binding growth factor;IPR020090,Pleiotrophin/Midkine, C-terminal domain;IPR038130,Pleiotrophin/Midkine, C-terminal dom…	-	GO:0008083,molecular_function,growth factor activity;GO:0010469,biological_process,regulation of signaling receptor activity	-
RIPK4	NC_040046.1;NC_040046.1;NC_040046.1;NC_040046.1;NC_040046.1;NC_040046.1;NC_040046.1;NC_040046.1	79609782;79612881;79613651;79614748;79616005;79616866;79624126;79628764	79612085;79613133;79613757;79614906;79616054;79617014;79624417;79629085	-;-;-;-;-;-;-;-	3636	0.062794578	0.066648247	0.105951019	2.453216164	1.882544183	2.569930229	7.53E-08	4.95E-06	-4.55760058	A0A226MHQ7,Uncharacterized protein	-	-	IPR002110,Ankyrin repeat;IPR011009,Protein kinase-like domain superfamily;IPR017441,Protein kinase, ATP binding site;IPR008271,Serine/threonine-protein kinase, active site;IPR036770,Ankyrin repeat-containing domain superfamily;IPR020683,Ankyrin repeat-containing domain;IPR000719,Protein kinase domain	-	GO:0006468,biological_process,protein phosphorylation;GO:0004672,molecular_function,protein kinase activity;GO:0005524,molecular_function,ATP binding	-
CAVIN1	NC_040073.1;NC_040073.1	2866549;2882735	2868577;2883360	-;-	2655	511.8090144	423.6948775	522.3403606	137.6471951	141.9306386	137.1244628	7.82E-08	5.11E-06	2.125131381	U3IIR2,Caveolae associated protein 1	XP_005012098.1,polymerase I and transcript release factor	PF15237,PTRF/SDPR family	IPR033297,Caveolae-associated protein 1;IPR026752,Cavin family	-	GO:0045121,cellular_component,membrane raft;GO:0005901,cellular_component,caveola;GO:0005737,cellular_component,cytoplasm;GO:2000147,biological_process,positive regulation of cell motility;GO:0009303,biological_process,rRNA transcription;GO:0006363,biological_process,termination of RNA polymerase I transcription;GO:0043231,cellular_component,intracellular membrane-bounded organelle;GO:0005886,cel…	-
BMP4	NC_040050.1;NC_040050.1;NC_040050.1;NC_040050.1;NC_040050.1	7837184;7837336;7839140;7839140;7839706	7838177;7838177;7839519;7839512;7839883	-;-;-;-;-	1552	3.064877098	3.278990667	2.895903503	15.46714483	15.92769037	17.44220322	7.91E-08	5.15E-06	-2.083943568	A5HMF9,Bone morphogenetic protein 4	-	PF00019,Transforming growth factor beta like domain;PF00688,TGF-beta propeptide	IPR001839,Transforming growth factor-beta, C-terminal;IPR015615,Transforming growth factor-beta-related;IPR017948,Transforming growth factor beta, conserved site;IPR029034,Cystine-knot cytokine;IPR001111,TGF-beta, propeptide	-	GO:0008283,biological_process,cell proliferation;GO:0008083,molecular_function,growth factor activity;GO:0010469,biological_process,regulation of signaling receptor activity;GO:0005576,cellular_component,extracellular region	-
ZNF385C	NC_040073.1;NC_040073.1;NC_040073.1;NC_040073.1;NC_040073.1;NC_040073.1;NC_040073.1;NC_040073.1;NC_040073.1;NC_040073.1;NC_040073.1	2966420;2972878;2974048;3010145;3015977;3019719;3020901;3022644;3024050;3024656;3025498	2966952;2973038;2974126;3010287;3016087;3019881;3021215;3022831;3024163;3024764;3027881	+;+;+;+;+;+;+;+;+;+;+	4300	0.398234449	0.466954001	0.388224246	4.006427526	3.488860905	3.478801611	7.99E-08	5.18E-06	-2.813726337	A0A087QJ78,Zinc finger protein 385C	-	PF12874,Zinc-finger of C2H2 type	IPR013087,Zinc finger C2H2-type;IPR003604,Matrin/U1-C-like, C2H2-type zinc finger;IPR036236,Zinc finger C2H2 superfamily	-	GO:0003676,molecular_function,nucleic acid binding;GO:0008270,molecular_function,zinc ion binding	-
SLC25A42	NC_040065.1;NC_040065.1;NC_040065.1;NC_040065.1;NC_040065.1;NC_040065.1;NC_040065.1;NC_040065.1;NC_040065.1;NC_040065.1;NC_040065.1;NC_040065.1;NC_040065.1;NC_040065.1;NC_040065.1;NC_040065.1;NC_040065.1;NC_040065.1;NC_040065.1;NC_040065.1;NC_040065.1;NC_040065.1;NC_040065.1;NC_040065.1	4037439;4038136;4045415;4046307;4046307;4046307;4048059;4048059;4048059;4050489;4050489;4050489;4051348;4051348;4051348;4052146;4052146;4052146;4052760;4052760;4052760;4053316;4053316;4053316	4037565;4041141;4046194;4046429;4046429;4046429;4048170;4048170;4048170;4050514;4050514;4050514;4051514;4051514;4051514;4052262;4052262;4052262;4052911;4052911;4052911;4058299;4058299;4058299	+;+;+;+;+;+;+;+;+;+;+;+;+;+;+;+;+;+;+;+;+;+;+;+	9594	8.460302842	8.017868019	8.981121359	2.898590912	2.739240961	3.511307453	8.18E-08	5.28E-06	1.795831998	U3IG12,Solute carrier family 25 member 42	XP_005026238.1,mitochondrial coenzyme A transporter SLC25A42	PF00153,Mitochondrial carrier protein	IPR018108,Mitochondrial substrate/solute carrier;IPR023395,Mitochondrial carrier domain superfamily;IPR002067,Mitochondrial carrier protein;IPR002167,Graves disease carrier protein	-	GO:0015866,biological_process,ADP transport;GO:0015228,molecular_function,coenzyme A transmembrane transporter activity;GO:0055085,biological_process,transmembrane transport;GO:0005347,molecular_function,ATP transmembrane transporter activity;GO:0080122,molecular_function,AMP transmembrane transporter activity;GO:0015217,molecular_function,ADP transmembrane transporter activity;GO:0080121,biologi…	-
XKRX	NC_040055.1;NC_040055.1;NC_040055.1;NC_040055.1;NC_040055.1;NC_040055.1;NC_040055.1;NC_040055.1;NC_040055.1;NC_040055.1;NC_040055.1;NC_040055.1;NC_040055.1;NC_040055.1;NC_040055.1;NC_040055.1;NC_040055.1;NC_040055.1;NC_040055.1;NC_040055.1;NC_040055.1;NC_040055.1;NC_040055.1;NC_040055.1;NC_040055.1;NC_040055.1;NC_040055.1;NC_040055.1;NC_040055.1;NC_040055.1;NC_040055.1;NC_040055.1;NC_040055.1;NC_…	14895119;14895124;14895129;14895148;14895149;14895149;14895149;14896235;14896235;14896235;14896238;14896238;14896566;14896566;14896566;14897275;14897278;14901741;14901741;14901741;14901741;14901741;14901741;14901741;14901741;14901741;14901741;14903645;14905784;14905784;14905784;14905784;14905784;14905784;14905784;14905784;14905784;14905784;14905784;14908293;14908293;14908293;14908293;14908293;149…	14895252;14895252;14895252;14895584;14895584;14895584;14895584;14896305;14896305;14896305;14896305;14896305;14896625;14896625;14896625;14897345;14897345;14902097;14902097;14902097;14902097;14902097;14902097;14902097;14902097;14902097;14902097;14904113;14905858;14906043;14905858;14905858;14905858;14905858;14905858;14905858;14905858;14905858;14905858;14908477;14908477;14908477;14908477;14908477;149…	+;+;+;+;+;+;+;+;+;+;+;+;+;+;+;+;+;+;+;+;+;+;+;+;+;+;+;+;+;+;+;+;+;+;+;+;+;+;+;+;+;+;+;+;+;+;+;+;+;+;+;+;+;+;+;+;+;+;+;+	3020	12.92811438	10.94740011	10.88530949	1.853243781	1.796785488	2.576226678	8.30E-08	5.34E-06	2.806397563	F1P2I0,XK-related protein	XP_015133977.1,-;XP_004940756.1,XK-related protein 2 isoform X2;XP_015133978.1,-	PF09815,XK-related protein	IPR018629,XK-related protein	ENOG410IJ21,-;ENOG4110US3,-	GO:0016021,cellular_component,integral component of membrane;GO:0016020,cellular_component,membrane	-
CAV1	NC_040046.1;NC_040046.1;NC_040046.1;NC_040046.1;NC_040046.1	176641738;176642123;176643170;176659609;176659609	176641779;176642287;176643307;176661997;176661995	+;+;+;+;+	2734	31.83188977	36.21446599	38.42045929	11.99477975	12.54410577	10.13605185	8.50E-08	5.44E-06	1.92594553	A0M8T8,Caveolin	-	PF01146,Caveolin	IPR001612,Caveolin;IPR018361,Caveolin, conserved site;IPR015504,Caveolin-1	ENOG4111HJR,-;ENOG410IV7A,-	GO:0031397,biological_process,negative regulation of protein ubiquitination;GO:0033138,biological_process,positive regulation of peptidyl-serine phosphorylation;GO:2000286,biological_process,receptor internalization involved in canonical Wnt signaling pathway;GO:0000122,biological_process,negative regulation of transcription by RNA polymerase II;GO:0001960,biological_process,negative regulation o…	-
HMCN2	NC_040063.1;NC_040063.1;NC_040063.1;NC_040063.1;NC_040063.1;NC_040063.1;NC_040063.1;NC_040063.1;NC_040063.1;NC_040063.1;NC_040063.1;NC_040063.1;NC_040063.1;NC_040063.1;NC_040063.1;NC_040063.1;NC_040063.1;NC_040063.1;NC_040063.1;NC_040063.1;NC_040063.1;NC_040063.1;NC_040063.1;NC_040063.1;NC_040063.1;NC_040063.1;NC_040063.1;NC_040063.1;NC_040063.1;NC_040063.1;NC_040063.1;NC_040063.1;NC_040063.1;NC_…	7596392;7596637;7597002;7597407;7597673;7597857;7598203;7598552;7598935;7599724;7600316;7600534;7600790;7600902;7601193;7601510;7602112;7602466;7602501;7602677;7602860;7603252;7603483;7603785;7604106;7604452;7604697;7605049;7605218;7605493;7606068;7606326;7606587;7606856;7607126;7607713;7608177;7608413;7608927;7609315;7609624;7609937;7610426;7610763;7611413;7611691;7611962;7612707;7613376;7613834…	7596522;7596756;7597313;7597535;7597726;7598094;7598324;7598689;7599084;7599993;7600397;7600724;7600821;7601034;7601406;7601700;7602246;7602498;7602599;7602784;7603024;7603373;7603639;7603912;7604253;7604593;7604833;7605130;7605408;7605765;7606165;7606509;7606711;7607015;7607269;7607838;7608273;7608726;7609133;7609465;7609766;7610050;7610599;7610951;7611499;7611804;7612129;7612988;7613537;7613953…	-;-;-;-;-;-;-;-;-;-;-;-;-;-;-;-;-;-;-;-;-;-;-;-;-;-;-;-;-;-;-;-;-;-;-;-;-;-;-;-;-;-;-;-;-;-;-;-;-;-;-;-;-;-;-;-;-;-;-;-;-;-;-;-;-;-;-;-;-;-;-;-;-;-;-;-;-;-;-;-;-;-;-;-;-;-;-;-;-;-;-;-;-	14491	0.824567208	0.817038106	1.252431564	0.021121716	0.046501503	0.024907689	8.54E-08	5.44E-06	5.232218559	U3IRV3,Uncharacterized protein	-	PF13927,Immunoglobulin domain;PF07645,Calcium-binding EGF domain;PF07474,2F domain;PF12662,Complement Clr-like EGF-like;PF07679,Immunoglobulin I-set domain	IPR032984,Hemicentin-2;IPR013106,Immunoglobulin V-set domain;IPR018097,EGF-like calcium-binding, conserved site;IPR036465,von Willebrand factor A-like domain superfamily;IPR006605,G2 nidogen/fibulin G2F;IPR009017,Green fluorescent protein;IPR009030,Growth factor receptor cysteine-rich domain superfamily;IPR003599,Immunoglobulin subtype;IPR001881,EGF-like calcium-binding domain;IPR036179,Immunoglo…	-	GO:0030054,cellular_component,cell junction;GO:0031012,cellular_component,extracellular matrix;GO:0005604,cellular_component,basement membrane;GO:0005938,cellular_component,cell cortex;GO:0005509,molecular_function,calcium ion binding;GO:0005576,cellular_component,extracellular region	-
CXCL12	NC_040051.1;NC_040051.1;NC_040051.1;NC_040051.1;NC_040051.1	18444223;18448541;18452038;18455774;18457967	18444383;18448658;18452124;18455871;18461886	+;+;+;+;+	4384	74.77897434	71.30693467	80.75584754	27.49766048	31.8497929	29.18162175	8.65E-08	5.47E-06	1.672864769	Q6T7B9,C-X-C motif chemokine ligand 12	XP_015143834.1,stromal cell-derived factor 1 isoform X1	PF00048,Small cytokines (intecrine/chemokine), interleukin-8 like	IPR033899,CXC Chemokine domain;IPR036048,Chemokine interleukin-8-like superfamily;IPR001811,Chemokine interleukin-8-like domain	ENOG410J1S5,-;ENOG4112BS6,-	GO:1901863,biological_process,positive regulation of muscle tissue development;GO:0008009,molecular_function,chemokine activity;GO:0060326,biological_process,cell chemotaxis;GO:0050918,biological_process,positive chemotaxis;GO:0007411,biological_process,axon guidance;GO:0006952,biological_process,defense response;GO:0006955,biological_process,immune response;GO:0007154,biological_process,cell com…	-
UNC5C	NC_040049.1;NC_040049.1;NC_040049.1;NC_040049.1;NC_040049.1;NC_040049.1;NC_040049.1;NC_040049.1;NC_040049.1;NC_040049.1;NC_040049.1;NC_040049.1;NC_040049.1;NC_040049.1;NC_040049.1;NC_040049.1;NC_040049.1;NC_040049.1;NC_040049.1;NC_040049.1;NC_040049.1;NC_040049.1;NC_040049.1;NC_040049.1;NC_040049.1;NC_040049.1;NC_040049.1;NC_040049.1;NC_040049.1;NC_040049.1;NC_040049.1;NC_040049.1;NC_040049.1;NC_…	8386778;8386782;8386783;8432268;8432268;8544139;8544139;8544139;8544139;8544139;8562788;8562788;8562788;8562788;8562788;8579462;8579462;8579462;8579462;8579462;8591350;8591350;8591350;8592193;8592193;8592342;8592342;8592342;8594002;8594002;8594002;8594002;8594002;8595430;8595430;8595430;8595430;8595430;8608821;8608821;8608821;8610346;8610346;8610346;8610346;8610346;8611806;8611806;8611806;8611806…	8387157;8387157;8387157;8432457;8432457;8544360;8544360;8544360;8544360;8544360;8562931;8562931;8562931;8562931;8562931;8579565;8579565;8579565;8579565;8579565;8591498;8591498;8591498;8592373;8592373;8592373;8592373;8592373;8594169;8594169;8594169;8594169;8594169;8595594;8595594;8595594;8595594;8595594;8608877;8608877;8608877;8610537;8610537;8610537;8610537;8610537;8612150;8612150;8612150;8612150…	+;+;+;+;+;+;+;+;+;+;+;+;+;+;+;+;+;+;+;+;+;+;+;+;+;+;+;+;+;+;+;+;+;+;+;+;+;+;+;+;+;+;+;+;+;+;+;+;+;+;+;+;+;+;+;+;+;+;+;+;+;+;+;+;+;+;+;+;+;+;+;+;+;+;+;+;+	7155	0.207419573	0.183860536	0.299120977	3.752219687	3.157486756	4.943655889	8.63E-08	5.47E-06	-3.789257487	A0A1V4JTX7,Netrin receptor UNC5C	-	-	IPR007110,Immunoglobulin-like domain;IPR000906,ZU5 domain;IPR000884,Thrombospondin type-1 (TSP1) repeat;IPR011029,Death-like domain superfamily;IPR000488,Death domain;IPR037936,Netrin receptor UNC5;IPR036179,Immunoglobulin-like domain superfamily;IPR013783,Immunoglobulin-like fold;IPR033772,UPA domain;IPR003599,Immunoglobulin subtype;IPR003598,Immunoglobulin subtype 2;IPR013098,Immunoglobulin I-s…	-	GO:0005042,molecular_function,netrin receptor activity;GO:0038007,biological_process,netrin-activated signaling pathway;GO:0007165,biological_process,signal transduction;GO:0016021,cellular_component,integral component of membrane;GO:0016020,cellular_component,membrane	-
AKAP6	NC_040050.1;NC_040050.1;NC_040050.1;NC_040050.1;NC_040050.1;NC_040050.1;NC_040050.1;NC_040050.1;NC_040050.1;NC_040050.1;NC_040050.1;NC_040050.1;NC_040050.1;NC_040050.1;NC_040050.1;NC_040050.1;NC_040050.1;NC_040050.1;NC_040050.1;NC_040050.1;NC_040050.1;NC_040050.1;NC_040050.1;NC_040050.1;NC_040050.1;NC_040050.1;NC_040050.1;NC_040050.1;NC_040050.1;NC_040050.1;NC_040050.1;NC_040050.1;NC_040050.1;NC_…	48608742;48608957;48613379;48617210;48617210;48617210;48619593;48619593;48619593;48619593;48619593;48619594;48667452;48667452;48667794;48670338;48670338;48670338;48670338;48670338;48670338;48670338;48670338;48670338;48670338;48670338;48690787;48707091;48707091;48707091;48707091;48707091;48707091;48707091;48707091;48707091;48707091;48707091;48707091;48711731;48711731;48711731;48711731;48711731;487…	48608884;48609386;48613577;48617421;48617421;48617421;48619879;48619879;48619879;48619879;48619879;48619879;48667700;48667700;48667929;48670695;48670695;48670695;48670695;48670695;48670695;48670695;48670695;48670695;48670695;48670695;48690924;48707342;48707342;48707342;48707342;48707342;48707342;48707342;48707342;48707342;48707342;48707342;48707342;48713521;48713521;48713521;48713521;48713521;487…	+;+;+;+;+;+;+;+;+;+;+;+;+;+;+;+;+;+;+;+;+;+;+;+;+;+;+;+;+;+;+;+;+;+;+;+;+;+;+;+;+;+;+;+;+;+;+;+;+;+;+;+;+;+;+;+;+;+;+;+;+;+;+;+;+;+;+;+;+;+;+;+;+;+;+;+;+;+;+;+;+;+;+;+;+;+;+;+;+;+;+;+;+;+;+;+;+;+;+;+;+;+;+;+;+;+;+;+;+;+;+;+;+;+;+;+;+;+;+;+;+;+;+;+;+;+;+;+;+;+;+;+;+;+;+;+;+;+;+;+;+;+;+;+;+;+;+;+;+;+;+;+;+;+;+;+;+;+;+;+;+;+;+;+;+;+;+;+;+;+;+;+;+	17079	6.684263841	7.544465778	6.298201546	2.393749481	2.620647809	2.216658763	8.91E-08	5.55E-06	1.816567834	R0JP02,A-kinase anchor protein 6	-	-	IPR018159,Spectrin/alpha-actinin;IPR026696,A-kinase anchor protein 6/Centrosomal protein of 68kDa	-	GO:0016301,molecular_function,kinase activity;GO:0016310,biological_process,phosphorylation	-
FOXD1	NC_040075.1;NC_040075.1;NC_040075.1;NC_040075.1;NC_040075.1;NC_040075.1;NC_040075.1;NC_040075.1	25102857;25106078;25106204;25106336;25106550;25106600;25106699;25106772	25102923;25106201;25106333;25106548;25106598;25106697;25106770;25109765	-;-;-;-;-;-;-;-	3747	0.071090098	0.092391256	0.102812358	1.913769724	2.479872437	1.851619289	8.94E-08	5.55E-06	-4.231224545	H0Z609,Uncharacterized protein	-	PF00250,orkhead domain	IPR018122,Fork head domain conserved site1;IPR001766,Fork head domain;IPR036390,Winged helix DNA-binding domain superfamily;IPR030456,Fork head domain conserved site 2;IPR036388,Winged helix-like DNA-binding domain superfamily	KOG2294,Transcription factor of the Forkhead/HNF3 family;COG5025,Transcription factor of the Forkhead/HNF3 family	GO:0003677,molecular_function,DNA binding;GO:0043565,molecular_function,sequence-specific DNA binding;GO:0003700,molecular_function,DNA binding transcription factor activity;GO:0045944,biological_process,positive regulation of transcription by RNA polymerase II;GO:0006355,biological_process,regulation of transcription, DNA-templated;GO:0005634,cellular_component,nucleus	-
GPT2	NC_040057.1;NC_040057.1;NC_040057.1;NC_040057.1;NC_040057.1;NC_040057.1;NC_040057.1;NC_040057.1;NC_040057.1;NC_040057.1;NC_040057.1	16039259;16043089;16044667;16048393;16050543;16052145;16052786;16053721;16054686;16056864;16058176	16039863;16043178;16044775;16048526;16050786;16052224;16052922;16053895;16054841;16056976;16061532	+;+;+;+;+;+;+;+;+;+;+	5200	0.900111967	1.205007622	1.168884245	6.390572606	5.551787115	6.540060938	8.97E-08	5.55E-06	-2.186619947	A0A091UYK9,Alanine aminotransferase 2	-	PF00155,Aminotransferase class I and II	IPR015421,Pyridoxal phosphate-dependent transferase, major domain;IPR015422,Pyridoxal phosphate-dependent transferase domain 1;IPR015424,Pyridoxal phosphate-dependent transferase;IPR004839,Aminotransferase, class I/classII	-	GO:0030170,molecular_function,pyridoxal phosphate binding;GO:0008483,molecular_function,transaminase activity;GO:0003824,molecular_function,catalytic activity;GO:0016740,molecular_function,transferase activity;GO:0009058,biological_process,biosynthetic process	-
IRX4	NC_040047.1;NC_040047.1;NC_040047.1;NC_040047.1;NC_040047.1;NC_040047.1;NC_040047.1;NC_040047.1;NC_040047.1;NC_040047.1;NC_040047.1;NC_040047.1;NC_040047.1;NC_040047.1;NC_040047.1;NC_040047.1;NC_040047.1;NC_040047.1;NC_040047.1;NC_040047.1;NC_040047.1;NC_040047.1;NC_040047.1;NC_040047.1;NC_040047.1;NC_040047.1;NC_040047.1;NC_040047.1;NC_040047.1;NC_040047.1;NC_040047.1;NC_040047.1	90308271;90308271;90308271;90308271;90308271;90309741;90309741;90309741;90309741;90309741;90310980;90310980;90310980;90310980;90310980;90311454;90311454;90311454;90311454;90311454;90312621;90312621;90312621;90312621;90312621;90317144;90317448;90317448;90317448;90317448;90317642;90317642	90309556;90309556;90309556;90309556;90309556;90310063;90310063;90310063;90310063;90310063;90311086;90311086;90311086;90311086;90311086;90311705;90311705;90311705;90311705;90311705;90312686;90312779;90312779;90312779;90312686;90317319;90318219;90318217;90317555;90317555;90318217;90318219	-;-;-;-;-;-;-;-;-;-;-;-;-;-;-;-;-;-;-;-;-;-;-;-;-;-;-;-;-;-;-;-	3075	0.136126392	0.191389613	0.069600344	5.588264517	5.720688491	4.382111701	8.96E-08	5.55E-06	-4.95216883	A0A1V4J871,Iroquois-class homeodomain protein IRX-4	-	-	IPR017970,Homeobox, conserved site;IPR008422,Homeobox KN domain;IPR001356,Homeobox domain;IPR009057,Homeobox-like domain superfamily;IPR003893,Iroquois-class homeodomain protein	-	GO:0043565,molecular_function,sequence-specific DNA binding;GO:0006355,biological_process,regulation of transcription, DNA-templated;GO:0003677,molecular_function,DNA binding;GO:0005634,cellular_component,nucleus	-
LOC110352821	NC_040060.1;NC_040060.1;NC_040060.1;NC_040060.1;NC_040060.1;NC_040060.1;NC_040060.1;NC_040060.1;NC_040060.1;NC_040060.1;NC_040060.1;NC_040060.1	6859412;6859412;6868534;6868534;6869258;6869258;6885576;6885576;6894772;6894772;7035947;7035947	6867339;6867339;6868619;6868619;6869427;6869427;6885726;6891188;6894886;6894886;7037567;7037567	-;-;-;-;-;-;-;-;-;-;-;-	15533	1.246973453	1.116598259	1.548700639	0.244902622	0.235176339	0.227204337	8.89E-08	5.55E-06	2.779711107	A0A0Q3U625,Uncharacterized protein	-	-	-	-	-	-
GJA8	NC_040046.1;NC_040046.1;NC_040046.1;NC_040046.1;NC_040046.1;NC_040046.1;NC_040046.1;NC_040046.1;NC_040046.1;NC_040046.1;NC_040046.1;NC_040046.1;NC_040046.1;NC_040046.1;NC_040046.1;NC_040046.1;NC_040046.1;NC_040046.1;NC_040046.1;NC_040046.1;NC_040046.1;NC_040046.1;NC_040046.1;NC_040046.1;NC_040046.1;NC_040046.1;NC_040046.1;NC_040046.1;NC_040046.1;NC_040046.1	107345785;107345785;107345785;107345785;107371963;107371963;107371963;107371963;107372520;107372520;107372520;107372520;107372734;107373502;107373502;107373502;107373511;107380145;107380145;107380145;107380145;107381212;107381212;107382080;107384492;107384804;107388422;107393038;107393339;107398178	107347804;107347804;107347804;107347804;107372055;107372055;107372055;107372055;107372904;107372904;107372643;107372904;107372904;107379695;107379626;107379626;107379626;107380222;107380222;107380222;107380222;107381304;107381304;107382182;107384539;107384921;107388537;107393235;107393525;107400200	-;-;-;-;-;-;-;-;-;-;-;-;-;-;-;-;-;-;-;-;-;-;-;-;-;-;-;-;-;-	11656	5.138660871	4.4521179	4.201099715	0.408889995	0.480749999	0.261488949	9.07E-08	5.59E-06	3.892389322	R0LQQ2,Gap junction protein	XP_005017701.1,-	PF00029,Connexin;PF03509,ap junction alpha-8 protein (Cx50)	IPR017990,Connexin, conserved site;IPR013092,Connexin, N-terminal;IPR019570,Gap junction protein, cysteine-rich domain;IPR038359,Connexin, N-terminal domain superfamily;IPR000500,Connexin;IPR034634,Connexin, C-terminal;IPR002266,Gap junction alpha-8 protein (Cx50)	-	GO:0030054,cellular_component,cell junction;GO:0005921,cellular_component,gap junction;GO:0005922,cellular_component,connexin complex;GO:0043010,biological_process,camera-type eye development;GO:0007154,biological_process,cell communication;GO:0005886,cellular_component,plasma membrane;GO:0016020,cellular_component,membrane;GO:0002088,biological_process,lens development in camera-type eye;GO:0016…	-
RIPOR2	NC_040047.1;NC_040047.1;NC_040047.1;NC_040047.1;NC_040047.1;NC_040047.1;NC_040047.1;NC_040047.1;NC_040047.1;NC_040047.1;NC_040047.1;NC_040047.1;NC_040047.1;NC_040047.1;NC_040047.1;NC_040047.1;NC_040047.1;NC_040047.1;NC_040047.1;NC_040047.1;NC_040047.1;NC_040047.1;NC_040047.1	94646759;94673591;94674780;94675564;94675864;94676411;94679189;94680243;94684348;94685229;94687230;94688121;94690506;94693808;94695863;94697321;94698341;94698394;94699148;94699951;94701566;94703431;94704531	94646948;94673717;94674935;94675642;94675887;94676464;94679338;94680306;94684391;94685354;94687378;94688250;94691198;94693992;94696031;94697456;94698391;94698501;94699306;94700153;94701649;94703521;94706151	+;+;+;+;+;+;+;+;+;+;+;+;+;+;+;+;+;+;+;+;+;+;+	4793	25.31078714	31.53485693	23.0944485	8.958464634	8.206082154	8.994775361	9.21E-08	5.66E-06	1.924075175	U3J0C4,Uncharacterized protein	-	PF15903,ilopodia upregulated, FAM65	IPR033035,Rho family-interacting cell polarization regulator 2;IPR026136,RIPOR family member 3;IPR011989,Armadillo-like helical;IPR031780,FAM65, N-terminal;IPR016024,Armadillo-type fold	-	GO:2000114,biological_process,regulation of establishment of cell polarity;GO:0045184,biological_process,establishment of protein localization;GO:0090023,biological_process,positive regulation of neutrophil chemotaxis;GO:0007162,biological_process,negative regulation of cell adhesion;GO:0035024,biological_process,negative regulation of Rho protein signal transduction;GO:0007605,biological_process…	-
IFFO1	NC_040046.1;NC_040046.1;NC_040046.1;NC_040046.1;NC_040046.1;NC_040046.1;NC_040046.1;NC_040046.1;NC_040046.1;NC_040046.1;NC_040046.1	121554274;121555529;121555786;121556214;121557248;121557888;121558349;121558794;121558973;121562771;121563054	121555351;121555659;121555881;121556334;121557432;121557896;121558489;121558889;121559033;121563052;121563557	-;-;-;-;-;-;-;-;-;-;-	2704	43.38719815	44.51563431	43.2316207	18.41817358	21.27433071	20.76398157	9.27E-08	5.67E-06	1.432803577	A0A226P974,Uncharacterized protein	-	-	IPR001664,Intermediate filament protein	-	GO:0005882,cellular_component,intermediate filament;GO:0005198,molecular_function,structural molecule activity	-
9bc06971-7d4e-4e38-bc11-6840fc89384c	NC_040073.1	6125081	6125486	-	406	17.33965542	22.51087912	18.34466219	2.907818233	2.533282994	2.667024572	9.37E-08	5.70E-06	3.150354711	U3IY97,Uncharacterized protein	-	-	-	-	-	-
LOC106020524	NC_040064.1;NC_040064.1;NC_040064.1;NC_040064.1;NC_040064.1;NC_040064.1;NC_040064.1;NC_040064.1;NC_040064.1;NC_040064.1;NC_040064.1;NC_040064.1;NC_040064.1;NC_040064.1;NC_040064.1;NC_040064.1;NC_040064.1;NC_040064.1;NC_040064.1;NC_040064.1;NC_040064.1;NC_040064.1;NC_040064.1;NC_040064.1;NC_040064.1;NC_040064.1;NC_040064.1;NC_040064.1;NC_040064.1;NC_040064.1;NC_040064.1;NC_040064.1;NC_040064.1;NC_…	6928903;6928903;6928903;6928903;6928903;6928903;6928903;6928903;6928903;6928903;6928903;6937594;6937594;6937594;6937594;6937594;6937594;6937594;6937594;6937594;6937594;6937594;6946901;6946901;6947971;6947971;6947971;6947971;6947971;6947971;6947971;6947971;6947971;6950275;6950275;6950770;6950770;6954335;6956047;6956047;6956047;6956047;6956047;6956047;6956047;6956051;6956051;6956051;6956051;6956051…	6929734;6929734;6929734;6929734;6929734;6929734;6929734;6929734;6929734;6929734;6929734;6939317;6939317;6939317;6939317;6939317;6939317;6939317;6939317;6939317;6939317;6939317;6946946;6946946;6948069;6948069;6948069;6948069;6948069;6948069;6948069;6948069;6948069;6950453;6950453;6950913;6950913;6954481;6956222;6956222;6956222;6956222;6956222;6956222;6956222;6956222;6956222;6956222;6956222;6956222…	-;-;-;-;-;-;-;-;-;-;-;-;-;-;-;-;-;-;-;-;-;-;-;-;-;-;-;-;-;-;-;-;-;-;-;-;-;-;-;-;-;-;-;-;-;-;-;-;-;-;-;-;-;-;-;-;-;-;-;-;-;-;-;-;-;-;-;-;-;-;-;-;-;-;-;-;-;-;-;-;-;-;-;-;-;-;-;-;-;-;-;-;-;-;-;-;-;-;-;-;-;-;-;-;-;-;-;-;-;-;-;-;-;-;-;-;-;-;-;-;-;-;-;-;-;-;-;-;-;-;-;-;-	4674	92.17840951	75.05228123	78.59344148	22.83539857	22.96106135	20.66127227	9.46E-08	5.72E-06	2.206294824	A0A212D7H3,MYH1	-	-	IPR002928,Myosin tail;IPR001609,Myosin head, motor domain;IPR027417,P-loop containing nucleoside triphosphate hydrolase;IPR004009,Myosin, N-terminal, SH3-like;IPR000048,IQ motif, EF-hand binding site;IPR036961,Kinesin motor domain superfamily;IPR008989,Myosin S1 fragment, N-terminal;IPR027401,Myosin IQ motif-containing domain superfamily	-	GO:0003777,molecular_function,microtubule motor activity;GO:0051015,molecular_function,actin filament binding;GO:0003774,molecular_function,motor activity;GO:0003779,molecular_function,actin binding;GO:0008017,molecular_function,microtubule binding;GO:0007018,biological_process,microtubule-based movement;GO:0016459,cellular_component,myosin complex;GO:0000166,molecular_function,nucleotide binding…	-
MYOZ2	NC_040049.1;NC_040049.1;NC_040049.1;NC_040049.1;NC_040049.1;NC_040049.1;NC_040049.1;NC_040049.1;NC_040049.1;NC_040049.1;NC_040049.1	44247692;44247692;44255399;44255399;44257378;44257378;44259980;44259980;44265513;44266188;44266188	44248130;44248130;44255582;44255582;44257507;44257507;44260149;44260149;44265616;44266343;44266344	-;-;-;-;-;-;-;-;-;-;-	1184	419.6492677	380.3704531	405.8085112	130.1408749	142.7325241	119.6011351	9.47E-08	5.72E-06	1.934770449	G1NE80,Myozenin 2	XP_003205760.1,-	PF05556,Calcineurin-binding protein (Calsarcin)	IPR008438,Myozenin	ENOG410ZK6W,-;ENOG410IKXK,-	GO:0015629,cellular_component,actin cytoskeleton;GO:0030018,cellular_component,Z disc;GO:0003779,molecular_function,actin binding;GO:0031433,molecular_function,telethonin binding	-
AFAP1L1	NC_040055.1;NC_040055.1;NC_040055.1;NC_040055.1;NC_040055.1;NC_040055.1;NC_040055.1;NC_040055.1;NC_040055.1;NC_040055.1;NC_040055.1;NC_040055.1;NC_040055.1;NC_040055.1;NC_040055.1;NC_040055.1;NC_040055.1;NC_040055.1;NC_040055.1;NC_040055.1;NC_040055.1;NC_040055.1;NC_040055.1;NC_040055.1;NC_040055.1;NC_040055.1;NC_040055.1;NC_040055.1;NC_040055.1;NC_040055.1;NC_040055.1;NC_040055.1;NC_040055.1;NC_…	845402;845402;845402;845402;846968;846968;846968;846968;848073;848073;848085;848515;848515;848515;848515;848895;848895;848895;848895;849138;849138;849138;849138;849561;849561;849561;849561;849883;849883;849883;849883;850362;850362;850362;850362;850644;850644;850644;850644;851033;851033;851033;851750;851750;851750;851750;852291;852291;852291;852291;852981;852981;852981;852981;853402;853402;853402;…	846581;846581;846581;846581;847096;847096;847096;847096;848251;848251;848251;848679;848679;848679;848679;849009;849009;849009;849009;849216;849216;849216;849216;849706;849706;849706;849706;850094;850094;850094;850094;850514;850514;850514;850514;850737;850737;850737;850737;851119;851119;851119;851929;851929;851929;851929;852502;852502;852502;852502;853079;853079;853079;853079;853513;853513;853513;…	-;-;-;-;-;-;-;-;-;-;-;-;-;-;-;-;-;-;-;-;-;-;-;-;-;-;-;-;-;-;-;-;-;-;-;-;-;-;-;-;-;-;-;-;-;-;-;-;-;-;-;-;-;-;-;-;-;-;-;-;-;-;-;-;-;-;-;-;-;-;-;-;-;-	3608	113.1902197	109.3549842	108.7426289	40.99821925	40.30222945	35.18005158	9.65E-08	5.81E-06	1.821653921	U3IX18,Actin filament associated protein 1 like 1	-	PF00169,PH domain	IPR030113,Actin-filament associated protein;IPR011993,PH-like domain superfamily;IPR001849,Pleckstrin homology domain;IPR030112,Actin filament-associated protein 1-like 1	-	-	-
ASTN2	NC_040063.1;NC_040063.1;NC_040063.1;NC_040063.1;NC_040063.1;NC_040063.1;NC_040063.1;NC_040063.1;NC_040063.1;NC_040063.1;NC_040063.1;NC_040063.1;NC_040063.1;NC_040063.1;NC_040063.1;NC_040063.1;NC_040063.1;NC_040063.1;NC_040063.1;NC_040063.1;NC_040063.1;NC_040063.1;NC_040063.1;NC_040063.1;NC_040063.1;NC_040063.1;NC_040063.1;NC_040063.1;NC_040063.1;NC_040063.1;NC_040063.1;NC_040063.1;NC_040063.1;NC_…	3490460;3490460;3490460;3490460;3490460;3490460;3490460;3490460;3490460;3490460;3490460;3494406;3497936;3497936;3497936;3497936;3497936;3497936;3497936;3497936;3497936;3497936;3497936;3497936;3499278;3499278;3499278;3499278;3499278;3499278;3499278;3499278;3499278;3499278;3499278;3499278;3523472;3523472;3523472;3523472;3523472;3523472;3523472;3523472;3523472;3523472;3523472;3523472;3559502;3559502…	3491408;3491408;3491408;3491408;3491408;3491408;3491408;3491408;3491408;3491408;3491408;3496481;3498119;3498119;3498119;3498119;3498119;3498119;3498119;3498119;3498119;3498119;3498119;3498119;3499378;3499378;3499378;3499378;3499378;3499378;3499378;3499378;3499378;3499378;3499378;3499378;3523613;3523613;3523613;3523613;3523613;3523613;3523613;3523613;3523613;3523613;3523613;3523613;3559701;3559701…	-;-;-;-;-;-;-;-;-;-;-;-;-;-;-;-;-;-;-;-;-;-;-;-;-;-;-;-;-;-;-;-;-;-;-;-;-;-;-;-;-;-;-;-;-;-;-;-;-;-;-;-;-;-;-;-;-;-;-;-;-;-;-;-;-;-;-;-;-;-;-;-;-;-;-;-;-;-;-;-;-;-;-;-;-;-;-;-;-;-;-;-;-;-;-;-;-;-;-;-;-;-;-;-;-;-;-;-;-;-;-;-;-;-;-;-;-;-;-;-;-;-;-;-;-;-;-;-;-;-;-;-;-;-;-;-;-;-;-;-;-;-;-;-;-;-;-;-;-;-;-;-;-;-;-;-;-;-;-;-;-;-;-;-;-;-;-;-;-;-;-;-;-;-;-;-;-;-;-;-;-;-;-;-;-;-;-;-;-;-;-;-;-;-;-;-;-;-;-;-…	8952	0.140277699	0.154687236	0.12431965	1.26017006	1.21230835	1.30813349	9.85E-08	5.89E-06	-2.849947789	F1NGF8,Astrotactin 2	-	PF14670,Coagulation Factor Xa inhibitory site;PF01823,MAC/Perforin domain	IPR003961,Fibronectin type III;IPR026995,Astrotactin;IPR020864,Membrane attack complex component/perforin (MACPF) domain	ENOG410IHIU,-;ENOG4110VB2,-	GO:0043533,molecular_function,inositol 1,3,4,5 tetrakisphosphate binding;GO:2000009,biological_process,negative regulation of protein localization to cell surface;GO:0005768,cellular_component,endosome;GO:0005509,molecular_function,calcium ion binding;GO:0016020,cellular_component,membrane;GO:0060187,cellular_component,cell pole;GO:0016021,cellular_component,integral component of membrane	-
RSPO2	NC_040047.1;NC_040047.1;NC_040047.1;NC_040047.1;NC_040047.1;NC_040047.1;NC_040047.1;NC_040047.1;NC_040047.1;NC_040047.1;NC_040047.1;NC_040047.1;NC_040047.1;NC_040047.1;NC_040047.1;NC_040047.1;NC_040047.1;NC_040047.1;NC_040047.1;NC_040047.1;NC_040047.1;NC_040047.1;NC_040047.1;NC_040047.1;NC_040047.1;NC_040047.1;NC_040047.1;NC_040047.1;NC_040047.1;NC_040047.1	137785737;137785737;137785737;137785737;137830335;137832677;137832677;137832677;137832677;137832677;137834248;137834248;137834248;137834248;137834248;137844929;137844929;137844929;137844929;137844929;137897971;137897971;137897971;137897971;137898007;137898675;137898675;137898675;137898675;137898675	137788433;137788433;137788433;137788433;137831822;137832865;137832865;137832865;137832865;137832862;137834391;137834391;137834391;137834391;137834391;137845117;137845117;137845117;137845117;137845117;137898298;137898303;137898303;137898303;137898303;137898915;137898919;137898919;137898920;137898926	-;-;-;-;-;-;-;-;-;-;-;-;-;-;-;-;-;-;-;-;-;-;-;-;-;-;-;-;-;-	5292	0.129433721	0.085042904	0.194123409	4.469994146	4.081400379	6.80527669	9.88E-08	5.89E-06	-4.925116732	A0A1V4KHD2,R-spondin-2	-	-	IPR000884,Thrombospondin type-1 (TSP1) repeat;IPR009030,Growth factor receptor cysteine-rich domain superfamily;IPR006212,Furin-like repeat;IPR036383,Thrombospondin type-1 (TSP1) repeat superfamily	-	-	-
P2RX5	NC_040065.1;NC_040065.1;NC_040065.1;NC_040065.1;NC_040065.1;NC_040065.1;NC_040065.1;NC_040065.1;NC_040065.1;NC_040065.1;NC_040065.1;NC_040065.1;NC_040065.1;NC_040065.1;NC_040065.1;NC_040065.1;NC_040065.1;NC_040065.1;NC_040065.1;NC_040065.1;NC_040065.1;NC_040065.1	9307226;9310491;9311301;9311373;9311911;9311911;9312709;9312709;9313615;9313615;9314494;9314494;9315045;9315045;9315499;9315499;9316900;9316900;9318399;9318399;9320825;9320825	9310053;9310573;9311366;9311794;9312004;9312004;9312845;9312845;9313753;9313753;9314574;9314574;9315141;9315141;9315574;9315574;9316971;9316971;9318549;9318549;9321178;9321181	-;-;-;-;-;-;-;-;-;-;-;-;-;-;-;-;-;-;-;-;-;-	4603	8.548193249	8.227936091	7.28127261	2.479299868	2.396244657	2.291416626	1.00E-07	5.94E-06	2.063503131	R0KZE2,p2X purinoceptor	-	PF00864,ATP P2X receptor	IPR003048,P2X5 purinoceptor;IPR027309,P2X purinoreceptor extracellular domain superfamily;IPR001429,P2X purinoreceptor	-	GO:0005216,molecular_function,ion channel activity;GO:0004931,molecular_function,extracellularly ATP-gated cation channel activity;GO:0098655,biological_process,cation transmembrane transport;GO:0033198,biological_process,response to ATP;GO:0005524,molecular_function,ATP binding;GO:0006811,biological_process,ion transport;GO:0035590,biological_process,purinergic nucleotide receptor signaling path…	-
VEGFA	NC_040048.1;NC_040048.1;NC_040048.1;NC_040048.1;NC_040048.1;NC_040048.1;NC_040048.1;NC_040048.1;NC_040048.1;NC_040048.1;NC_040048.1;NC_040048.1;NC_040048.1;NC_040048.1;NC_040048.1;NC_040048.1;NC_040048.1;NC_040048.1;NC_040048.1;NC_040048.1;NC_040048.1;NC_040048.1;NC_040048.1;NC_040048.1;NC_040048.1;NC_040048.1;NC_040048.1;NC_040048.1;NC_040048.1;NC_040048.1;NC_040048.1;NC_040048.1;NC_040048.1;NC_…	32316558;32316558;32316558;32316558;32316558;32316558;32316558;32316558;32316558;32316558;32322928;32322928;32322928;32322928;32322928;32322928;32322928;32322928;32322928;32322928;32329024;32329024;32329024;32329024;32329024;32329024;32329024;32329024;32329024;32329024;32330831;32330831;32330831;32330831;32330831;32330831;32330831;32330831;32330831;32330831;32331313;32331313;32331313;32331313;323…	32317126;32317126;32317126;32317126;32317126;32317126;32317126;32317126;32317126;32317126;32322979;32322979;32322979;32322979;32322979;32322979;32322979;32322979;32322979;32322979;32329220;32329220;32329220;32329220;32329220;32329220;32329220;32329220;32329220;32329220;32330907;32330907;32330907;32330907;32330907;32330907;32330907;32330907;32330907;32330907;32331345;32331345;32331345;32331345;323…	+;+;+;+;+;+;+;+;+;+;+;+;+;+;+;+;+;+;+;+;+;+;+;+;+;+;+;+;+;+;+;+;+;+;+;+;+;+;+;+;+;+;+;+;+;+;+;+;+;+;+;+;+;+;+;+;+;+;+;+;+;+;+;+;+;+;+;+;+;+;+;+;+;+;+	5987	25.38595876	23.30292034	26.69632985	9.238698452	10.60957705	10.35593981	1.00E-07	5.94E-06	1.636688191	A0A1V4JJV4,Vascular endothelial growth factor A isoform A	-	-	IPR027928,Vascular endothelial growth factor, heparin-binding domain;IPR023581,Platelet-derived growth factor, conserved site;IPR000072,PDGF/VEGF domain;IPR029034,Cystine-knot cytokine;IPR036841,Vascular endothelial growth factor, heparin-binding domain superfamily	-	GO:0008083,molecular_function,growth factor activity;GO:0010469,biological_process,regulation of signaling receptor activity;GO:0008201,molecular_function,heparin binding;GO:0016020,cellular_component,membrane	-
GLI1	NC_040073.1;NC_040073.1;NC_040073.1;NC_040073.1;NC_040073.1;NC_040073.1;NC_040073.1;NC_040073.1;NC_040073.1;NC_040073.1;NC_040073.1;NC_040073.1;NC_040073.1;NC_040073.1	6059225;6070198;6070544;6071113;6071567;6071640;6071823;6072051;6072817;6073449;6074125;6074554;6075086;6075463	6059555;6070364;6070639;6071308;6071637;6071728;6071924;6072191;6072966;6073613;6074373;6074833;6075460;6078084	+;+;+;+;+;+;+;+;+;+;+;+;+;+	5034	2.328264268	2.083742165	2.21078567	9.137598118	10.18748131	10.86651904	1.01E-07	5.95E-06	-1.86900718	U3IBR1,GLI family zinc finger 1	-	PF00096,Zinc finger, C2H2 type	IPR013087,Zinc finger C2H2-type;IPR036236,Zinc finger C2H2 superfamily;IPR032850,Zinc finger protein GLI1	-	GO:0007283,biological_process,spermatogenesis;GO:0003705,molecular_function,transcription factor activity, RNA polymerase II distal enhancer sequence-specific binding;GO:0021983,biological_process,pituitary gland development;GO:0009953,biological_process,dorsal/ventral pattern formation;GO:0003676,molecular_function,nucleic acid binding;GO:0008017,molecular_function,microtubule binding;GO:0009954…	-
CD151	NC_040050.1;NC_040050.1;NC_040050.1;NC_040050.1;NC_040050.1;NC_040050.1;NC_040050.1;NC_040050.1;NC_040050.1;NC_040050.1;NC_040050.1;NC_040050.1;NC_040050.1;NC_040050.1;NC_040050.1;NC_040050.1;NC_040050.1;NC_040050.1;NC_040050.1;NC_040050.1;NC_040050.1;NC_040050.1;NC_040050.1;NC_040050.1;NC_040050.1;NC_040050.1;NC_040050.1;NC_040050.1;NC_040050.1;NC_040050.1;NC_040050.1;NC_040050.1;NC_040050.1;NC_…	50230352;50230434;50230435;50230439;50239268;50239268;50242946;50242946;50242946;50242946;50242946;50245595;50248048;50248048;50248050;50248050;50248050;50248050;50248050;50249011;50249011;50249011;50249011;50249011;50249011;50249011;50253047;50253047;50253047;50253047;50253047;50253047;50253047;50255343;50255343;50255343;50255343;50255343;50255343;50255343;50256315;50256315;50256315;50256315;502…	50230372;50230591;50230591;50230591;50239394;50239394;50243013;50243040;50243040;50243040;50243013;50245614;50248153;50248153;50248153;50248153;50248153;50248153;50248153;50249202;50249202;50249202;50249202;50249202;50249202;50249202;50253121;50253121;50253121;50253121;50253121;50253121;50253121;50255447;50255447;50255447;50255447;50255447;50255447;50255447;50256470;50256470;50256470;50256470;502…	+;+;+;+;+;+;+;+;+;+;+;+;+;+;+;+;+;+;+;+;+;+;+;+;+;+;+;+;+;+;+;+;+;+;+;+;+;+;+;+;+;+;+;+;+;+;+;+;+;+;+;+;+;+;+;+;+;+;+;+;+	3357	57.16528786	48.97397903	60.08145544	17.47956817	17.22058919	20.71510019	1.02E-07	6.00E-06	1.905457348	A0A093J5C4,Tetraspanin	-	PF00335,Tetraspanin family	IPR018503,Tetraspanin, conserved site;IPR018499,Tetraspanin/Peripherin;IPR008952,Tetraspanin, EC2 domain superfamily;IPR000301,Tetraspanin	-	GO:0016021,cellular_component,integral component of membrane;GO:0016020,cellular_component,membrane	-
FBXW4	NC_040051.1;NC_040051.1;NC_040051.1;NC_040051.1;NC_040051.1;NC_040051.1;NC_040051.1;NC_040051.1;NC_040051.1;NC_040051.1;NC_040051.1;NC_040051.1;NC_040051.1;NC_040051.1;NC_040051.1;NC_040051.1;NC_040051.1;NC_040051.1	14207874;14207874;14208875;14208875;14209184;14209184;14221556;14221556;14246960;14246960;14249530;14249530;14250833;14250833;14253761;14253761;14265303;14266367	14208640;14208640;14209016;14209016;14209324;14209324;14221621;14221621;14247054;14247054;14249662;14249662;14251018;14251018;14253856;14253856;14265669;14266720	-;-;-;-;-;-;-;-;-;-;-;-;-;-;-;-;-;-	2347	17.39728188	19.04266447	18.45669464	7.284390051	8.129819987	8.594966371	1.03E-07	6.00E-06	1.507657276	A0A1D5PGM5,F-box and WD repeat domain containing 4	XP_001233793.2,F-box/WD repeat-containing protein 4	-	IPR017986,WD40-repeat-containing domain;IPR036322,WD40-repeat-containing domain superfamily;IPR015943,WD40/YVTN repeat-like-containing domain superfamily;IPR001680,WD40 repeat;IPR036047,F-box-like domain superfamily;IPR001810,F-box domain	-	-	-
RUNX2	NC_040048.1;NC_040048.1;NC_040048.1;NC_040048.1;NC_040048.1;NC_040048.1;NC_040048.1;NC_040048.1;NC_040048.1;NC_040048.1;NC_040048.1;NC_040048.1;NC_040048.1;NC_040048.1	112489613;112489623;112491856;112498556;112498556;112498556;112537508;112537508;112547319;112547319;112547319;112572179;112639028;112639028	112492937;112492937;112492937;112498660;112498660;112498660;112537681;112537681;112547480;112547480;112547480;112577181;112639999;112639999	+;+;+;+;+;+;+;+;+;+;+;+;+;+	9741	0.14454163	0.095956585	0.109855795	2.536147039	2.326532149	1.815617385	1.03E-07	6.00E-06	-3.934899125	A0A1V4JNC9,Runt-related transcription factor 2 isoform A	-	-	IPR012346,p53/RUNT-type transcription factor, DNA-binding domain superfamily;IPR000040,Acute myeloid leukemia 1 protein (AML1)/Runt;IPR008967,p53-like transcription factor, DNA-binding;IPR013524,Runt domain	-	GO:0006355,biological_process,regulation of transcription, DNA-templated;GO:0003700,molecular_function,DNA binding transcription factor activity;GO:0003677,molecular_function,DNA binding;GO:0005524,molecular_function,ATP binding;GO:0005634,cellular_component,nucleus	-
33f7d49b-87e7-4cb4-98cf-df3e23fe5238	NC_040046.1	63575834	63578634	-	2801	0.149442576	0.160673704	0.21394465	7.243265367	4.102453288	5.340537997	1.06E-07	6.13E-06	-4.681098052	A0A218UXJ2,POU domain protein	-	-	IPR016362,POU-domain transcription factor, class 3;IPR009057,Homeobox-like domain superfamily;IPR010982,Lambda repressor-like, DNA-binding domain superfamily;IPR017970,Homeobox, conserved site;IPR013847,POU domain;IPR001356,Homeobox domain;IPR000327,POU-specific domain	-	GO:0003677,molecular_function,DNA binding;GO:0043565,molecular_function,sequence-specific DNA binding;GO:0006357,biological_process,regulation of transcription by RNA polymerase II;GO:0003700,molecular_function,DNA binding transcription factor activity;GO:0006355,biological_process,regulation of transcription, DNA-templated;GO:0006351,biological_process,transcription, DNA-templated;GO:0007420,bio…	-
CASQ2	NC_040046.1;NC_040046.1;NC_040046.1;NC_040046.1;NC_040046.1;NC_040046.1;NC_040046.1;NC_040046.1;NC_040046.1;NC_040046.1;NC_040046.1	119032716;119037147;119037486;119038107;119040620;119043610;119044561;119045131;119046933;119047512;119060184	119034708;119037221;119037586;119038161;119040665;119043740;119044634;119045242;119047033;119047596;119060544	-;-;-;-;-;-;-;-;-;-;-	3134	271.4985878	323.467862	306.8409132	107.275462	127.9445327	110.6255115	1.06E-07	6.13E-06	1.692809034	A0A091JY55,Calsequestrin	XP_010209082.1,calsequestrin-2	PF01216,Calsequestrin	IPR018233,Calsequestrin, conserved site;IPR001393,Calsequestrin;IPR036249,Thioredoxin-like superfamily	-	GO:0005509,molecular_function,calcium ion binding	-
POU3F3	NC_040046.1;NC_040046.1	63575834;63576679	63576677;63578634	-;-	2800	0.149495948	0.160731088	0.214021059	7.245852248	4.10391845	5.342445332	1.06E-07	6.13E-06	-4.681098052	A0A1D5PY72,POU domain protein	-	-	IPR016362,POU-domain transcription factor, class 3;IPR009057,Homeobox-like domain superfamily;IPR010982,Lambda repressor-like, DNA-binding domain superfamily;IPR017970,Homeobox, conserved site;IPR013847,POU domain;IPR001356,Homeobox domain;IPR000327,POU-specific domain	-	GO:0003677,molecular_function,DNA binding;GO:0043565,molecular_function,sequence-specific DNA binding;GO:0006357,biological_process,regulation of transcription by RNA polymerase II;GO:0003700,molecular_function,DNA binding transcription factor activity;GO:0006355,biological_process,regulation of transcription, DNA-templated;GO:0006351,biological_process,transcription, DNA-templated;GO:0007420,bio…	-
BMP7	NC_040066.1;NC_040066.1;NC_040066.1;NC_040066.1;NC_040066.1;NC_040066.1;NC_040066.1	9937621;9940678;9941291;9943070;9947705;9958419;9983390	9939421;9940788;9941367;9943267;9947853;9958611;9984236	-;-;-;-;-;-;-	3376	1.634407446	1.743255508	1.407365968	10.86648407	9.853990603	9.265768621	1.08E-07	6.14E-06	-2.332226946	A0A218UZM4,Bone morphogenetic protein 7	-	-	IPR001839,Transforming growth factor-beta, C-terminal;IPR015615,Transforming growth factor-beta-related;IPR017948,Transforming growth factor beta, conserved site;IPR029034,Cystine-knot cytokine;IPR001111,TGF-beta, propeptide	-	GO:0008083,molecular_function,growth factor activity;GO:0010469,biological_process,regulation of signaling receptor activity;GO:0005576,cellular_component,extracellular region	-
LOC113843304	NC_040048.1;NC_040048.1	92247205;92248607	92248514;92249517	+;+	2221	0.274136076	0.420852361	0.462539884	5.158010923	4.902318914	4.839221732	1.09E-07	6.14E-06	-3.376609983	A0A226MGP8,Uncharacterized protein	-	-	IPR035915,Plakin repeat superfamily;IPR001101,Plectin repeat	-	GO:0005856,cellular_component,cytoskeleton	-
MOXD1	NC_040048.1;NC_040048.1;NC_040048.1;NC_040048.1;NC_040048.1;NC_040048.1;NC_040048.1;NC_040048.1;NC_040048.1;NC_040048.1;NC_040048.1;NC_040048.1	59937929;59949474;59951080;59951362;59971263;59973683;59976933;59979328;59981786;59985991;59989555;59991947	59938240;59949620;59951247;59951445;59971442;59973785;59977099;59979519;59981845;59986133;59989723;59992440	+;+;+;+;+;+;+;+;+;+;+;+	2219	1.852086308	2.215366605	2.71987105	14.04952859	16.84593234	14.92835766	1.09E-07	6.14E-06	-2.448042071	A0A1V4JLI8,DBH-like monooxygenase protein 1	-	-	IPR036939,Copper type II, ascorbate-dependent monooxygenase, N-terminal domain superfamily;IPR005018,DOMON domain;IPR014784,Copper type II, ascorbate-dependent monooxygenase-like, C-terminal;IPR008977,PHM/PNGase F domain superfamily;IPR000323,Copper type II, ascorbate-dependent monooxygenase, N-terminal;IPR024548,Copper type II ascorbate-dependent monooxygenase, C-terminal;IPR028463,DBH-like mono…	-	GO:0055114,biological_process,oxidation-reduction process;GO:0004497,molecular_function,monooxygenase activity;GO:0016715,molecular_function,oxidoreductase activity, acting on paired donors, with incorporation or reduction of molecular oxygen, reduced ascorbate as one donor, and incorporation of one atom of oxygen;GO:0005507,molecular_function,copper ion binding;GO:0003824,molecular_function,cata…	-
PTPN21	NC_040050.1;NC_040050.1;NC_040050.1;NC_040050.1;NC_040050.1;NC_040050.1;NC_040050.1;NC_040050.1;NC_040050.1;NC_040050.1;NC_040050.1;NC_040050.1;NC_040050.1;NC_040050.1;NC_040050.1;NC_040050.1;NC_040050.1	22428928;22432606;22441866;22443976;22446741;22447290;22447694;22448485;22450518;22451041;22452832;22456613;22459112;22460543;22460983;22461756;22462748	22429385;22432978;22442035;22444073;22446808;22447360;22447749;22448632;22450578;22451125;22454297;22456750;22459333;22460671;22461217;22461916;22469358	+;+;+;+;+;+;+;+;+;+;+;+;+;+;+;+;+	10550	57.41211214	42.15971156	40.23595907	7.634255506	8.249618061	9.134622357	1.07E-07	6.14E-06	2.8105873	R0L3Z5,Tyrosine-protein phosphatase non-receptor type 21	XP_005028671.1,tyrosine-protein phosphatase non-receptor type 21 isoform X2	PF00102,Protein-tyrosine phosphatase;PF09379,RM N-terminal domain;PF00373,RM central domain;PF09380,RM C-terminal PH-like domain	IPR019748,FERM central domain;IPR029021,Protein-tyrosine phosphatase-like;IPR014392,Protein-tyrosine phosphatase, non-receptor type-14, -21;IPR035963,FERM superfamily, second domain;IPR018979,FERM, N-terminal;IPR000387,Tyrosine specific protein phosphatases domain;IPR000299,FERM domain;IPR000242,PTP type protein phosphatase;IPR011993,PH-like domain superfamily;IPR003595,Protein-tyrosine phosphata…	-	GO:0004725,molecular_function,protein tyrosine phosphatase activity;GO:0035335,biological_process,peptidyl-tyrosine dephosphorylation;GO:0005856,cellular_component,cytoskeleton;GO:0006470,biological_process,protein dephosphorylation;GO:0016311,biological_process,dephosphorylation;GO:0016791,molecular_function,phosphatase activity	-
RETREG1	NC_040047.1;NC_040047.1;NC_040047.1;NC_040047.1;NC_040047.1;NC_040047.1;NC_040047.1;NC_040047.1;NC_040047.1;NC_040047.1;NC_040047.1;NC_040047.1;NC_040047.1;NC_040047.1;NC_040047.1;NC_040047.1;NC_040047.1;NC_040047.1;NC_040047.1;NC_040047.1;NC_040047.1;NC_040047.1;NC_040047.1;NC_040047.1;NC_040047.1;NC_040047.1;NC_040047.1	69856649;69856649;69856649;69862082;69862082;69862082;69863367;69863367;69863367;69865341;69865341;69865341;69866152;69866152;69866152;69868004;69868004;69868004;69874809;69878140;69884929;69904214;69904214;69905869;69905869;69918652;69918652	69859586;69859586;69859586;69862208;69862208;69862208;69863431;69863431;69863431;69865478;69865478;69865478;69866236;69866236;69866236;69868130;69868130;69868130;69874921;69878387;69884986;69904244;69904244;69905975;69905975;69918949;69918956	-;-;-;-;-;-;-;-;-;-;-;-;-;-;-;-;-;-;-;-;-;-;-;-;-;-;-	4342	7.256635106	7.646159456	7.541506682	2.829736688	2.385090023	2.641590538	1.09E-07	6.14E-06	1.828589175	R0KBT3,Protein FAM134B	-	-	IPR033358,Reticulophagy receptor 1	-	GO:0030176,cellular_component,integral component of endoplasmic reticulum membrane;GO:0061709,biological_process,reticulophagy;GO:0016021,cellular_component,integral component of membrane;GO:0016020,cellular_component,membrane	-
SMTN	NC_040061.1;NC_040061.1;NC_040061.1;NC_040061.1;NC_040061.1;NC_040061.1;NC_040061.1;NC_040061.1;NC_040061.1;NC_040061.1;NC_040061.1;NC_040061.1;NC_040061.1;NC_040061.1;NC_040061.1;NC_040061.1;NC_040061.1;NC_040061.1;NC_040061.1;NC_040061.1;NC_040061.1;NC_040061.1	10895509;10898860;10900308;10900537;10900738;10901273;10901488;10902302;10902776;10902993;10904580;10906337;10906998;10908116;10909722;10910170;10910734;10911995;10912434;10912682;10912985;10919503	10896554;10898928;10900459;10900660;10900908;10901336;10901550;10902466;10902851;10903259;10905154;10906475;10907089;10908808;10909968;10910483;10910836;10912326;10912512;10912775;10913145;10919671	-;-;-;-;-;-;-;-;-;-;-;-;-;-;-;-;-;-;-;-;-;-	5195	126.8108634	148.2786231	146.1687617	56.21541438	49.02426805	46.87437578	1.09E-07	6.14E-06	1.777705043	A0A226P9Z8,Uncharacterized protein	-	-	IPR001715,Calponin homology domain;IPR022189,Smoothelin;IPR036872,CH domain superfamily	-	-	-
LOC113840832	NW_020865322.1;NW_020865322.1;NW_020865322.1;NW_020865322.1;NW_020865322.1;NW_020865322.1;NW_020865322.1;NW_020865322.1;NW_020865322.1;NW_020865322.1;NW_020865322.1;NW_020865322.1;NW_020865322.1;NW_020865322.1;NW_020865322.1;NW_020865322.1;NW_020865322.1;NW_020865322.1;NW_020865322.1;NW_020865322.1;NW_020865322.1;NW_020865322.1;NW_020865322.1;NW_020865322.1;NW_020865322.1;NW_020865322.1;NW_020865…	37441;37748;37984;38800;38914;39114;40397;40552;40757;40943;41338;41547;42652;43624;44037;44477;44657;44947;45156;45395;47521;47855;48108;48353;48531;49109;49465;49879;50444;50714;51060;51468;53761;54228;54459;54716;54945;55340	37659;37891;38140;38827;39025;39206;40460;40650;40860;41081;41456;41696;42822;43930;44113;44564;44774;45070;45292;45650;47763;48031;48253;48443;48920;49235;49583;50075;50627;50879;51184;51776;53964;54353;54629;54820;55040;55620	+;+;+;+;+;+;+;+;+;+;+;+;+;+;+;+;+;+;+;+;+;+;+;+;+;+;+;+;+;+;+;+;+;+;+;+;+;+	5963	1534.131599	1622.320932	1455.314487	461.8216275	512.9628293	457.7037971	1.10E-07	6.16E-06	2.000672592	A0A1D5PUR6,Uncharacterized protein	-	-	IPR002928,Myosin tail;IPR001609,Myosin head, motor domain;IPR027417,P-loop containing nucleoside triphosphate hydrolase;IPR004009,Myosin, N-terminal, SH3-like;IPR000048,IQ motif, EF-hand binding site;IPR036961,Kinesin motor domain superfamily;IPR008989,Myosin S1 fragment, N-terminal;IPR027401,Myosin IQ motif-containing domain superfamily	-	GO:0051015,molecular_function,actin filament binding;GO:0016459,cellular_component,myosin complex;GO:0003777,molecular_function,microtubule motor activity;GO:0003779,molecular_function,actin binding;GO:0008017,molecular_function,microtubule binding;GO:0007018,biological_process,microtubule-based movement;GO:0003774,molecular_function,motor activity;GO:0000166,molecular_function,nucleotide binding…	-
IRX1	NC_040047.1;NC_040047.1;NC_040047.1;NC_040047.1;NC_040047.1	91478388;91478898;91481682;91483198;91483663	91478653;91479194;91482696;91483270;91484074	+;+;+;+;+	2063	0.387360056	0.117466323	0.290479382	19.37209065	19.25442431	13.62724539	1.12E-07	6.25E-06	-5.734037674	Q9I9C5,Iroquois homologue-1	NP_001025509.1,iroquois-class homeodomain protein IRX-1	PF05920,Homeobox KN domain	IPR009057,Homeobox-like domain superfamily;IPR017970,Homeobox, conserved site;IPR006311,Twin-arginine translocation pathway, signal sequence;IPR003893,Iroquois-class homeodomain protein;IPR008422,Homeobox KN domain;IPR001356,Homeobox domain	-	GO:0043565,molecular_function,sequence-specific DNA binding;GO:0006355,biological_process,regulation of transcription, DNA-templated;GO:0003677,molecular_function,DNA binding;GO:0005634,cellular_component,nucleus	-
GRIP2	NC_040058.1;NC_040058.1;NC_040058.1;NC_040058.1;NC_040058.1;NC_040058.1;NC_040058.1;NC_040058.1;NC_040058.1;NC_040058.1;NC_040058.1;NC_040058.1;NC_040058.1;NC_040058.1;NC_040058.1;NC_040058.1;NC_040058.1;NC_040058.1;NC_040058.1;NC_040058.1;NC_040058.1;NC_040058.1;NC_040058.1;NC_040058.1;NC_040058.1;NC_040058.1;NC_040058.1;NC_040058.1;NC_040058.1;NC_040058.1;NC_040058.1;NC_040058.1;NC_040058.1;NC_…	21440875;21440875;21440875;21440875;21440875;21440875;21440875;21440875;21440875;21445574;21445574;21445574;21445574;21445574;21445574;21445574;21445574;21445574;21446912;21446912;21446912;21446912;21446912;21446912;21446912;21446912;21446912;21450874;21450874;21450874;21450874;21450874;21450874;21450874;21450874;21450874;21451001;21453931;21453931;21453931;21453931;21453931;21453931;21453931;214…	21443089;21443089;21443089;21443089;21443089;21443089;21443089;21443089;21443089;21445720;21445720;21445720;21445720;21445720;21445720;21445720;21445720;21445720;21447148;21447148;21447148;21447148;21447148;21447148;21447148;21447148;21447148;21450994;21450994;21450994;21450994;21450994;21450994;21450994;21450994;21450994;21451397;21454084;21454084;21454084;21454084;21454084;21454084;21454084;214…	-;-;-;-;-;-;-;-;-;-;-;-;-;-;-;-;-;-;-;-;-;-;-;-;-;-;-;-;-;-;-;-;-;-;-;-;-;-;-;-;-;-;-;-;-;-;-;-;-;-;-;-;-;-;-;-;-;-;-;-;-;-;-;-;-;-;-;-;-;-;-;-;-;-;-;-;-;-;-;-;-;-;-;-;-;-;-;-;-;-;-;-;-;-;-;-;-;-;-;-;-;-;-;-;-;-;-;-;-;-;-;-;-;-;-;-;-;-;-;-;-;-;-;-;-;-;-;-;-;-;-;-;-;-;-;-;-;-;-;-;-;-;-;-;-;-;-;-;-;-;-;-;-;-;-;-;-;-;-;-;-;-;-;-;-;-;-;-;-;-;-;-;-;-;-;-;-;-;-;-;-;-;-;-;-;-;-;-;-;-;-;-;-;-;-;-;-;-;-;-…	7572	41.44576471	35.56540257	39.43504773	10.50969971	13.28334231	13.03967387	1.16E-07	6.43E-06	1.98154146	A0A1V4JII1,Glutamate receptor-interacting protein 2	-	-	IPR030029,Glutamate receptor-interacting protein 2;IPR036034,PDZ superfamily;IPR001478,PDZ domain	-	GO:0030159,molecular_function,receptor signaling complex scaffold activity	-
LOC106016351	NC_040048.1;NC_040048.1;NC_040048.1;NC_040048.1;NC_040048.1;NC_040048.1;NC_040048.1;NC_040048.1;NC_040048.1;NC_040048.1;NC_040048.1;NC_040048.1;NC_040048.1;NC_040048.1	64230344;64231925;64234661;64234661;64236366;64236366;64241141;64241141;64256124;64256124;64266042;64266042;64267184;64267208	64230401;64231984;64234719;64234719;64236560;64236560;64241200;64241200;64256195;64256195;64266077;64266077;64267335;64267335	+;+;+;+;+;+;+;+;+;+;+;+;+;+	692	117.2950079	78.6431698	85.79399095	13.96418854	14.55539477	13.85099884	1.16E-07	6.43E-06	3.058359392	A0A099ZUA6,Triadin	-	PF05279,Aspartyl beta-hydroxylase N-terminal region	IPR007943,Aspartyl beta-hydroxylase/Triadin domain;IPR010798,Triadin	-	GO:0016529,cellular_component,sarcoplasmic reticulum;GO:0005102,molecular_function,signaling receptor binding;GO:0016021,cellular_component,integral component of membrane;GO:0016020,cellular_component,membrane	-
LOC113842616	NC_040047.1;NC_040047.1	4959219;4959495	4959350;4961742	+;+	2380	16.21271565	13.7748724	13.50670716	3.619251757	3.248562898	3.033086768	1.16E-07	6.43E-06	2.453519218	A0A226N8I0,Uncharacterized protein	-	-	IPR012510,Actin-binding, Xin repeat;IPR030072,Xin actin-binding repeat-containing protein 1/2	-	GO:0030036,biological_process,actin cytoskeleton organization;GO:0030054,cellular_component,cell junction;GO:0007507,biological_process,heart development;GO:0003779,molecular_function,actin binding	-
HOXB5	NC_040073.1;NC_040073.1;NC_040073.1;NC_040073.1;NC_040073.1	5037387;5037387;5039445;5040358;5040482	5038552;5038552;5039568;5041304;5041289	-;-;-;-;-	2237	1.667073928	1.872552268	1.856061038	11.3759199	9.258883218	10.72073315	1.18E-07	6.48E-06	-2.225343916	G1MUC9,Homeobox B5	-	PF00046,Homeobox domain	IPR009057,Homeobox-like domain superfamily;IPR017995,Homeobox protein, antennapedia type;IPR017970,Homeobox, conserved site;IPR020479,Homeobox domain, metazoa;IPR001827,Homeobox protein, antennapedia type, conserved site;IPR001356,Homeobox domain	ENOG410ZTBY,-;KOG0489,Transcription factor zerknullt and related HOX domain proteins	GO:0016525,biological_process,negative regulation of angiogenesis;GO:0006366,biological_process,transcription by RNA polymerase II;GO:0003677,molecular_function,DNA binding;GO:0045647,biological_process,negative regulation of erythrocyte differentiation;GO:0043565,molecular_function,sequence-specific DNA binding;GO:0003700,molecular_function,DNA binding transcription factor activity;GO:0045944,bi…	-
PPP2R3B	NC_040046.1;NC_040046.1;NC_040046.1;NC_040046.1;NC_040046.1;NC_040046.1;NC_040046.1;NC_040046.1;NC_040046.1;NC_040046.1;NC_040046.1;NC_040046.1;NC_040046.1;NC_040046.1;NC_040046.1;NC_040046.1;NC_040046.1;NC_040046.1;NC_040046.1;NC_040046.1;NC_040046.1;NC_040046.1;NC_040046.1;NC_040046.1;NC_040046.1;NC_040046.1;NC_040046.1;NC_040046.1;NC_040046.1;NC_040046.1;NC_040046.1;NC_040046.1;NC_040046.1;NC_…	68724330;68724330;68724330;68724330;68724330;68724330;68729075;68729075;68729075;68729075;68729075;68729075;68729266;68729266;68729266;68729266;68729266;68729266;68732992;68732992;68732992;68732992;68732992;68732992;68733501;68733501;68733501;68733501;68733501;68733501;68734625;68734625;68734625;68734625;68734625;68734625;68736763;68736763;68736763;68736763;68736763;68736763;68737337;68737337;687…	68725510;68725510;68725510;68725510;68725510;68725510;68729181;68729181;68729181;68729181;68729181;68729181;68729384;68729384;68729384;68729384;68729384;68729384;68733167;68733167;68733167;68733167;68733167;68733167;68733590;68733590;68733590;68733590;68733590;68733590;68734673;68734673;68734673;68734673;68734673;68734673;68736919;68736919;68736919;68736919;68736919;68736919;68737423;68737423;687…	-;-;-;-;-;-;-;-;-;-;-;-;-;-;-;-;-;-;-;-;-;-;-;-;-;-;-;-;-;-;-;-;-;-;-;-;-;-;-;-;-;-;-;-;-;-;-;-;-;-;-;-;-;-;-;-;-;-;-;-;-;-;-;-;-;-;-;-;-;-;-;-;-;-;-;-;-;-;-;-;-;-	4417	96.42176346	74.32465705	91.78145569	20.87751023	24.82697628	22.36280614	1.19E-07	6.51E-06	2.268183668	R0KV52,Serine/threonine-protein phosphatase 2A regulatory subunit B'' subunit beta	XP_005025437.1,serine/threonine-protein phosphatase 2A regulatory subunit B'' subunit beta isoform X1	PF13499,-hand domain pair	IPR002048,EF-hand domain;IPR018247,EF-Hand 1, calcium-binding site;IPR011992,EF-hand domain pair	-	GO:0005509,molecular_function,calcium ion binding	K11583,ko04152,AMPK signaling pathway;K11583,ko04151,PI3K-Akt signaling pathway;K11583,ko03015,mRNA surveillance pathway;K11583,ko04071,Sphingolipid signaling pathway;K11583,ko04728,Dopaminergic synapse;K11583,ko04261,Adrenergic signaling in cardiomyocytes
CMYA5	NC_040075.1;NC_040075.1;NC_040075.1;NC_040075.1;NC_040075.1;NC_040075.1;NC_040075.1;NC_040075.1;NC_040075.1;NC_040075.1;NC_040075.1;NC_040075.1	22545518;22547099;22547836;22548542;22555912;22559782;22560895;22565461;22567567;22568557;22580261;22587230	22546154;22547275;22547935;22548675;22556056;22559928;22561044;22565582;22567589;22580259;22580393;22587508	-;-;-;-;-;-;-;-;-;-;-;-	13750	23.88930424	19.49238728	19.16072171	4.140357203	3.742626236	3.012915209	1.20E-07	6.55E-06	2.83800901	A0A226NFU9,Uncharacterized protein	-	-	IPR003961,Fibronectin type III;IPR036116,Fibronectin type III superfamily;IPR013783,Immunoglobulin-like fold;IPR013320,Concanavalin A-like lectin/glucanase domain superfamily	-	-	-
LOC101798111	NC_040046.1;NC_040046.1;NC_040046.1	354404;355645;355983	354582;355867;360144	-;-;-	4564	0.125066326	0.182045592	0.103165278	4.406986506	4.219548054	2.855794886	1.20E-07	6.55E-06	-4.477699504	R0KYP5,Hemoglobin subunit rho	-	PF00042,lobin	IPR009050,Globin-like superfamily;IPR000971,Globin;IPR002337,Haemoglobin, beta-type;IPR012292,Globin/Protoglobin	-	GO:0019825,molecular_function,oxygen binding;GO:0015671,biological_process,oxygen transport;GO:0046872,molecular_function,metal ion binding;GO:0005344,molecular_function,oxygen carrier activity;GO:0005833,cellular_component,hemoglobin complex;GO:0005506,molecular_function,iron ion binding;GO:0020037,molecular_function,heme binding	-
CRABP1	NC_040056.1;NC_040056.1;NC_040056.1;NC_040056.1	13988046;13996687;13999560;13999857	13988373;13996800;13999738;14000016	-;-;-;-	781	5.993063032	9.131260846	11.07099972	242.5308221	171.2447406	309.0227378	1.24E-07	6.75E-06	-4.477337676	B0FLN8,Cellular retinoic acid binding protein I	NP_001025710.1,cellular retinoic acid-binding protein 1	PF00061,Lipocalin / cytosolic fatty-acid binding protein family	IPR031259,Intracellular lipid binding protein;IPR031279,Cellular retinoic acid-binding protein 1;IPR000463,Cytosolic fatty-acid binding;IPR000566,Lipocalin/cytosolic fatty-acid binding domain;IPR012674,Calycin	ENOG4111US8,-;KOG4015,Fatty acid-binding protein FABP	GO:0070852,cellular_component,cell body fiber;GO:0005737,cellular_component,cytoplasm;GO:0030424,cellular_component,axon;GO:0005623,cellular_component,cell;GO:0034653,biological_process,retinoic acid catabolic process;GO:0008289,molecular_function,lipid binding;GO:0005501,molecular_function,retinoid binding;GO:0001972,molecular_function,retinoic acid binding;GO:0005829,cellular_component,cytosol;…	-
WNT10A	NC_040052.1;NC_040052.1;NC_040052.1;NC_040052.1	36182055;36185747;36191182;36193460	36183147;36186123;36191444;36193906	-;-;-;-	2180	0.069822962	0.063521107	0.01963496	3.67049064	2.847038227	3.072198437	1.29E-07	6.96E-06	-5.567623796	A0A226PBI7,Protein Wnt	-	-	IPR013302,Wnt-10 protein;IPR018161,Wnt protein, conserved site;IPR005817,Wnt	-	GO:0016055,biological_process,Wnt signaling pathway;GO:0005578,,;GO:0007275,biological_process,multicellular organism development;GO:0005576,cellular_component,extracellular region;GO:0005102,molecular_function,signaling receptor binding	-
ANXA8L1	NC_040051.1;NC_040051.1;NC_040051.1;NC_040051.1;NC_040051.1;NC_040051.1;NC_040051.1;NC_040051.1;NC_040051.1;NC_040051.1;NC_040051.1;NC_040051.1;NC_040051.1	19638509;19638787;19642444;19642800;19644102;19645064;19645742;19646416;19647001;19648951;19649282;19650078;19651367	19638668;19638833;19642534;19642894;19644215;19645154;19645821;19646475;19647094;19649046;19649340;19650200;19651652	+;+;+;+;+;+;+;+;+;+;+;+;+	1396	0.354366535	0.371980697	0.275958385	7.924367856	7.951895472	5.659396139	1.31E-07	7.01E-06	-4.096178461	U3I5K3,Annexin	-	PF00191,Annexin	IPR037104,Annexin superfamily;IPR018502,Annexin repeat;IPR001464,Annexin;IPR018252,Annexin repeat, conserved site;IPR009115,Annexin A8	-	GO:0005544,molecular_function,calcium-dependent phospholipid binding;GO:0005509,molecular_function,calcium ion binding	-
MYLK2	NC_040066.1;NC_040066.1;NC_040066.1;NC_040066.1;NC_040066.1;NC_040066.1;NC_040066.1;NC_040066.1;NC_040066.1;NC_040066.1;NC_040066.1;NC_040066.1	14929605;14935023;14936125;14937249;14937535;14937785;14938009;14938248;14938451;14938698;14939225;14940704	14929620;14936007;14936459;14937354;14937628;14937894;14938150;14938318;14938579;14938850;14939357;14942264	+;+;+;+;+;+;+;+;+;+;+;+	3835	7.759543151	6.797421026	8.326451627	2.211902026	1.979065411	1.986906905	1.31E-07	7.01E-06	2.204630802	A0A1V4KKT8,Myosin light chain kinase 2, skeletal/cardiac muscle isoform A	-	-	IPR011009,Protein kinase-like domain superfamily;IPR017441,Protein kinase, ATP binding site;IPR008271,Serine/threonine-protein kinase, active site;IPR000719,Protein kinase domain	-	GO:0005524,molecular_function,ATP binding;GO:0016301,molecular_function,kinase activity;GO:0006468,biological_process,protein phosphorylation;GO:0004672,molecular_function,protein kinase activity;GO:0016310,biological_process,phosphorylation	-
SDC3	NC_040069.1;NC_040069.1;NC_040069.1;NC_040069.1;NC_040069.1	4522241;4523079;4524631;4525656;4531015	4522549;4523349;4525244;4525773;4531059	-;-;-;-;-	1357	14.5539969	13.26594091	16.65484438	66.37688957	65.80935306	62.09197745	1.31E-07	7.01E-06	-1.814102416	U3INY9,Syndecan	-	PF01034,Syndecan domain	IPR031194,Syndecan-3;IPR030479,Syndecan, conserved site;IPR001050,Syndecan;IPR003585,Neurexin/syndecan/glycophorin C;IPR027789,Syndecan/Neurexin domain	-	GO:0031012,cellular_component,extracellular matrix;GO:0042802,molecular_function,identical protein binding;GO:0016021,cellular_component,integral component of membrane;GO:0016020,cellular_component,membrane	-
DKK1	NC_040051.1;NC_040051.1;NC_040051.1;NC_040051.1	30474081;30474726;30474982;30475204	30474616;30474882;30475092;30476075	+;+;+;+	1676	0.045409921	0.08262292	0.153237035	6.104798978	8.887651554	5.455695451	1.32E-07	7.01E-06	-5.873659764	A0A226ME61,Uncharacterized protein	-	-	IPR006796,Dickkopf, N-terminal cysteine-rich	-	GO:0030178,biological_process,negative regulation of Wnt signaling pathway;GO:0007275,biological_process,multicellular organism development;GO:0005576,cellular_component,extracellular region	-
C4H4orf50	NC_040049.1;NC_040049.1;NC_040049.1;NC_040049.1;NC_040049.1;NC_040049.1;NC_040049.1;NC_040049.1;NC_040049.1;NC_040049.1;NC_040049.1;NC_040049.1;NC_040049.1;NC_040049.1;NC_040049.1;NC_040049.1;NC_040049.1;NC_040049.1;NC_040049.1;NC_040049.1;NC_040049.1;NC_040049.1;NC_040049.1;NC_040049.1;NC_040049.1;NC_040049.1;NC_040049.1;NC_040049.1;NC_040049.1;NC_040049.1;NC_040049.1;NC_040049.1;NC_040049.1;NC_…	63785755;63785755;63785755;63785755;63785755;63819921;63819921;63819921;63819921;63831636;63831636;63833639;63833639;63833639;63833639;63833639;63833639;63835185;63835185;63835185;63835185;63835185;63835185;63835185;63835298;63841085;63843846;63843846;63843846;63843846;63843846;63843846;63843846;63843846;63844475;63844475;63844475;63844475;63844475;63844475;63844475;63844475;63846723;63846723;638…	63789074;63789074;63789074;63789074;63789074;63820019;63820019;63820019;63820019;63832407;63834049;63834049;63834049;63834049;63834049;63834049;63834049;63835427;63835427;63835427;63835427;63835427;63835427;63835427;63835427;63841351;63844028;63844028;63844028;63844028;63844028;63844028;63844028;63844028;63844531;63844531;63844531;63844531;63844531;63844531;63844531;63844531;63846899;63846899;638…	-;-;-;-;-;-;-;-;-;-;-;-;-;-;-;-;-;-;-;-;-;-;-;-;-;-;-;-;-;-;-;-;-;-;-;-;-;-;-;-;-;-;-;-;-;-;-;-;-;-;-;-;-;-;-;-;-;-;-;-;-;-;-;-;-;-;-;-;-;-;-;-;-;-;-;-;-;-;-;-;-;-;-;-;-;-;-;-;-;-;-;-;-;-;-;-;-;-;-;-;-;-;-;-;-;-;-;-;-;-;-;-;-;-;-;-;-;-;-;-;-;-;-;-;-;-;-;-;-;-;-;-;-;-;-;-;-;-;-	10933	26.18811302	18.58083898	20.8324532	4.107339675	4.703708477	4.079009582	1.33E-07	7.05E-06	2.670670288	A0A226NYL6,Uncharacterized protein	-	-	IPR032771,Protein of unknown function DUF4527	-	-	-
MTSS1	NC_040047.1;NC_040047.1;NC_040047.1;NC_040047.1;NC_040047.1;NC_040047.1;NC_040047.1;NC_040047.1;NC_040047.1;NC_040047.1;NC_040047.1;NC_040047.1;NC_040047.1;NC_040047.1;NC_040047.1;NC_040047.1;NC_040047.1;NC_040047.1;NC_040047.1;NC_040047.1;NC_040047.1;NC_040047.1;NC_040047.1;NC_040047.1;NC_040047.1;NC_040047.1;NC_040047.1;NC_040047.1;NC_040047.1;NC_040047.1;NC_040047.1;NC_040047.1;NC_040047.1;NC_…	144804743;144804743;144804743;144804743;144804743;144804743;144806204;144806204;144808533;144808533;144808533;144808533;144808533;144808533;144808533;144808533;144809093;144809093;144809093;144809093;144809093;144809093;144809093;144809093;144811156;144811156;144811909;144811909;144812040;144812040;144813110;144813110;144813110;144813110;144820571;144820571;144820571;144820571;144820571;144820571…	144805954;144805954;144805954;144805954;144805954;144805954;144806816;144806963;144808695;144808695;144808695;144808695;144808695;144808695;144808695;144808695;144809257;144809257;144809257;144809257;144809257;144809257;144809257;144809257;144811286;144811286;144812103;144812103;144812103;144812103;144813229;144813229;144813229;144813229;144820781;144820778;144820781;144820778;144820781;144820781…	-;-;-;-;-;-;-;-;-;-;-;-;-;-;-;-;-;-;-;-;-;-;-;-;-;-;-;-;-;-;-;-;-;-;-;-;-;-;-;-;-;-;-;-;-;-;-;-;-;-;-;-;-;-;-;-;-;-;-;-;-;-;-;-;-;-;-;-;-;-;-;-;-;-;-;-;-;-;-;-;-;-;-;-;-;-;-;-;-;-;-;-;-;-;-;-;-;-;-;-;-;-;-;-;-;-;-;-;-;-;-;-;-;-;-;-	4149	88.8557349	94.39498351	79.36678747	20.42395583	28.2086465	27.9250136	1.36E-07	7.21E-06	2.096835303	U3JIN1,MTSS1, I-BAR domain containing	XP_005042523.1,metastasis suppressor protein 1 isoform X1	PF08397,IRSp53/MIM homology domain;PF02205,WH2 motif	IPR003124,WH2 domain;IPR030127,I-BAR domain containing protein MIM/ABBA;IPR027267,AH/BAR domain superfamily;IPR027682,I-BAR domain containing protein MIM;IPR013606,IMD/I-BAR domain	-	GO:0030036,biological_process,actin cytoskeleton organization;GO:0015629,cellular_component,actin cytoskeleton;GO:0005102,molecular_function,signaling receptor binding;GO:0003785,molecular_function,actin monomer binding;GO:0007009,biological_process,plasma membrane organization;GO:0003779,molecular_function,actin binding;GO:0042802,molecular_function,identical protein binding	-
UPK3BL1	NC_040065.1;NC_040065.1;NC_040065.1;NC_040065.1;NC_040065.1;NC_040065.1	12201957;12202604;12202833;12203152;12203321;12203531	12202130;12202759;12203064;12203228;12203450;12203724	+;+;+;+;+;+	963	0.079031182	0.215694726	0.22224409	6.17507371	6.665980381	6.413331961	1.39E-07	7.34E-06	-4.879336954	A0A091KBJ0,Uroplakin-3b-like	-	-	IPR024831,Uroplakin-3	-	GO:0016021,cellular_component,integral component of membrane;GO:0016020,cellular_component,membrane	-
PAPPA2	NC_040053.1;NC_040053.1;NC_040053.1;NC_040053.1;NC_040053.1;NC_040053.1;NC_040053.1;NC_040053.1;NC_040053.1;NC_040053.1;NC_040053.1;NC_040053.1;NC_040053.1;NC_040053.1;NC_040053.1;NC_040053.1;NC_040053.1;NC_040053.1;NC_040053.1;NC_040053.1;NC_040053.1;NC_040053.1	24488596;24493257;24509733;24516039;24516842;24518123;24519863;24520859;24521371;24521729;24523089;24526207;24526499;24534440;24536814;24538854;24546613;24546895;24548085;24550769;24563305;24564817	24489064;24494316;24509878;24516332;24517034;24518244;24520355;24520987;24521462;24521922;24523226;24526342;24526718;24534611;24536991;24539067;24546781;24547027;24548194;24550840;24563403;24565988	+;+;+;+;+;+;+;+;+;+;+;+;+;+;+;+;+;+;+;+;+;+	6005	0.025347886	0.028825149	0.01425619	0.910178403	0.76778935	1.041839629	1.40E-07	7.37E-06	-4.928108718	A0A1V4JXJ3,Pappalysin-2 isoform B	-	-	IPR026918,Pappalysin-2;IPR008754,Peptidase M43, pregnancy-associated plasma-A;IPR000800,Notch domain;IPR024079,Metallopeptidase, catalytic domain superfamily;IPR035976,Sushi/SCR/CCP superfamily;IPR000436,Sushi/SCR/CCP domain;IPR013320,Concanavalin A-like lectin/glucanase domain superfamily;IPR006558,LamG-like jellyroll fold;IPR011936,Myxococcus cysteine-rich repeat	-	GO:0006508,biological_process,proteolysis;GO:0008270,molecular_function,zinc ion binding;GO:0008237,molecular_function,metallopeptidase activity	-
LOC113840001	NC_040073.1;NC_040073.1;NC_040073.1;NC_040073.1	6163397;6163752;6163900;6164061	6163484;6163784;6163932;6164126	+;+;+;+	220	1.729705184	1.888309282	3.307598183	58.23371066	43.52640781	52.68226618	1.42E-07	7.42E-06	-4.175886777	-	-	-	-	-	-	-
LOC101794131	NC_040059.1;NC_040059.1;NC_040059.1;NC_040059.1;NC_040059.1;NC_040059.1;NC_040059.1;NC_040059.1;NC_040059.1;NC_040059.1;NC_040059.1;NC_040059.1;NC_040059.1;NC_040059.1;NC_040059.1;NC_040059.1;NC_040059.1;NC_040059.1;NC_040059.1;NC_040059.1;NC_040059.1;NC_040059.1;NC_040059.1;NC_040059.1;NC_040059.1;NC_040059.1;NC_040059.1;NC_040059.1;NC_040059.1;NC_040059.1;NC_040059.1;NC_040059.1;NC_040059.1;NC_…	6224009;6224009;6224009;6235788;6235788;6236106;6236106;6236106;6238689;6238689;6239203;6239203;6239203;6239203;6239203;6239203;6239203;6239203;6239203;6239203;6239203;6239203;6239203;6239203;6239203;6239203;6239203;6239203;6239203;6239203;6239203;6239203;6239663;6239663;6239663;6239663;6239663;6239663;6241441;6241441;6241441;6241441;6241441;6241441;6241441;6241441;6241441;6241441;6241441;6241441…	6224167;6224167;6224167;6238809;6236192;6236192;6238809;6236192;6238809;6238809;6239778;6239778;6239778;6239778;6239559;6239778;6239778;6239778;6239778;6239778;6239778;6239778;6239778;6239778;6239778;6239778;6239778;6239778;6239778;6239778;6239778;6239778;6239778;6239778;6239778;6239778;6239778;6239778;6241603;6241603;6241603;6241603;6241603;6241603;6241603;6241603;6241603;6241603;6241603;6241603…	-;-;-;-;-;-;-;-;-;-;-;-;-;-;-;-;-;-;-;-;-;-;-;-;-;-;-;-;-;-;-;-;-;-;-;-;-;-;-;-;-;-;-;-;-;-;-;-;-;-;-;-;-;-;-;-;-;-;-;-;-;-;-;-;-;-;-;-;-;-;-;-;-;-;-;-;-;-;-;-;-;-;-;-;-;-;-;-;-;-;-;-;-;-;-;-;-;-;-;-;-;-;-;-;-;-;-;-;-;-;-;-;-;-;-;-;-;-;-;-;-;-;-;-;-;-;-;-;-;-;-;-;-;-;-;-;-;-;-;-;-;-;-;-;-;-;-;-;-;-;-;-;-;-;-;-;-;-;-;-;-;-;-;-;-;-;-;-;-;-;-;-;-;-;-;-;-;-;-;-;-;-;-;-;-;-;-;-;-;-;-;-;-;-;-;-;-;-;-;-…	11223	19.99479394	23.60681046	23.55890726	8.395911195	6.655200552	6.575036172	1.43E-07	7.44E-06	1.942291231	R0JWL9,Uncharacterized protein	-	-	-	-	-	-
YBX3	NC_040046.1;NC_040046.1;NC_040046.1;NC_040046.1;NC_040046.1;NC_040046.1;NC_040046.1;NC_040046.1;NC_040046.1;NC_040046.1;NC_040046.1;NC_040046.1;NC_040046.1;NC_040046.1;NC_040046.1;NC_040046.1;NC_040046.1;NC_040046.1;NC_040046.1	124207830;124207830;124208723;124208723;124209470;124209470;124211306;124211306;124216279;124216279;124217082;124217082;124222238;124222238;124223941;124223941;124227121;124227121;124227314	124208340;124208340;124208824;124208824;124209641;124209641;124211400;124211400;124216401;124216401;124217171;124217171;124222271;124222271;124224004;124224004;124227446;124227211;124227442	-;-;-;-;-;-;-;-;-;-;-;-;-;-;-;-;-;-;-	1517	1409.284425	1457.580997	1396.314584	584.2486165	586.6963179	548.6099301	1.45E-07	7.52E-06	1.623349434	A0A091HTA5,Nuclease-sensitive element-binding protein 1	-	PF00313,'Cold-shock' DNA-binding domain	IPR019844,Cold-shock conserved site;IPR002059,Cold-shock protein, DNA-binding;IPR011129,Cold shock domain;IPR012340,Nucleic acid-binding, OB-fold	-	GO:0006355,biological_process,regulation of transcription, DNA-templated;GO:0003676,molecular_function,nucleic acid binding;GO:0003677,molecular_function,DNA binding	-
8488adf6-d5f9-408a-bcdb-80603c23e506	NC_040047.1	94704531	94706151	+	1621	17.04309142	20.71587501	15.60597727	5.367840297	5.272854301	5.195478671	1.47E-07	7.59E-06	2.064451311	R0LEM3,Protein FAM65B	-	PF15903,ilopodia upregulated, FAM65	IPR033035,Rho family-interacting cell polarization regulator 2;IPR026136,RIPOR family member 3;IPR011989,Armadillo-like helical;IPR031780,FAM65, N-terminal;IPR016024,Armadillo-type fold	-	GO:0048741,biological_process,skeletal muscle fiber development;GO:0007605,biological_process,sensory perception of sound	-
CRYM	NC_040060.1;NC_040060.1;NC_040060.1;NC_040060.1;NC_040060.1;NC_040060.1;NC_040060.1;NC_040060.1;NC_040060.1;NC_040060.1;NC_040060.1;NC_040060.1;NC_040060.1;NC_040060.1;NC_040060.1;NC_040060.1;NC_040060.1	8117798;8117802;8118519;8118519;8119722;8119722;8126918;8126918;8127550;8127550;8128617;8129869;8129869;8130848;8130848;8131601;8131601	8118296;8118296;8118669;8118669;8119784;8119784;8127019;8127019;8127733;8127733;8128658;8129990;8129990;8130932;8130932;8133927;8133927	+;+;+;+;+;+;+;+;+;+;+;+;+;+;+;+;+	3575	2.89526037	3.311803971	3.603935034	12.63437608	11.98402294	12.70992975	1.51E-07	7.62E-06	-1.61691911	A0A1V4KT11,Ketimine reductase mu-crystallin	-	-	IPR023401,Ornithine cyclodeaminase, N-terminal;IPR036291,NAD(P)-binding domain superfamily;IPR003462,Ornithine cyclodeaminase/mu-crystallin	-	-	-
EYA1	NC_040047.1;NC_040047.1;NC_040047.1;NC_040047.1;NC_040047.1;NC_040047.1;NC_040047.1;NC_040047.1;NC_040047.1;NC_040047.1;NC_040047.1;NC_040047.1;NC_040047.1;NC_040047.1;NC_040047.1;NC_040047.1;NC_040047.1;NC_040047.1;NC_040047.1;NC_040047.1;NC_040047.1;NC_040047.1;NC_040047.1;NC_040047.1;NC_040047.1;NC_040047.1;NC_040047.1;NC_040047.1;NC_040047.1;NC_040047.1;NC_040047.1;NC_040047.1;NC_040047.1;NC_…	122763769;122763769;122763769;122763769;122763769;122763769;122763769;122763769;122763769;122763769;122763769;122763769;122763769;122763769;122763769;122763769;122763769;122763769;122763769;122763769;122763769;122763769;122763769;122774074;122774074;122774074;122774074;122774074;122774074;122774074;122774074;122774074;122774074;122774074;122774074;122774074;122774074;122774074;122774074;122774074…	122766011;122766011;122766011;122766011;122766011;122766011;122766011;122766011;122766011;122766011;122766011;122766011;122766011;122766011;122766011;122766011;122766011;122766011;122766011;122766011;122766011;122766011;122766011;122774174;122774174;122774174;122774174;122774174;122774174;122774174;122774174;122774174;122774174;122774174;122774174;122774174;122774174;122774174;122774174;122774174…	-;-;-;-;-;-;-;-;-;-;-;-;-;-;-;-;-;-;-;-;-;-;-;-;-;-;-;-;-;-;-;-;-;-;-;-;-;-;-;-;-;-;-;-;-;-;-;-;-;-;-;-;-;-;-;-;-;-;-;-;-;-;-;-;-;-;-;-;-;-;-;-;-;-;-;-;-;-;-;-;-;-;-;-;-;-;-;-;-;-;-;-;-;-;-;-;-;-;-;-;-;-;-;-;-;-;-;-;-;-;-;-;-;-;-;-;-;-;-;-;-;-;-;-;-;-;-;-;-;-;-;-;-;-;-;-;-;-;-;-;-;-;-;-;-;-;-;-;-;-;-;-;-;-;-;-;-;-;-;-;-;-;-;-;-;-;-;-;-;-;-;-;-;-;-;-;-;-;-;-;-;-;-;-;-;-;-;-;-;-;-;-;-;-;-;-;-;-;-;-…	5876	20.50978199	19.93126086	19.97432755	8.81047737	9.856350546	9.145601996	1.52E-07	7.62E-06	1.434955833	A0A1V4KGN1,Eyes absent homolog	-	-	IPR028471,Eyes absent homologue 1;IPR028472,Eyes absent family;IPR006545,EYA domain;IPR038102,EYA domain superfamily	-	GO:0016787,molecular_function,hydrolase activity;GO:0004725,molecular_function,protein tyrosine phosphatase activity;GO:0004721,molecular_function,phosphoprotein phosphatase activity;GO:0035335,biological_process,peptidyl-tyrosine dephosphorylation;GO:0046872,molecular_function,metal ion binding;GO:0006355,biological_process,regulation of transcription, DNA-templated;GO:0009887,biological_process…	-
IGSF11	NC_040046.1;NC_040046.1;NC_040046.1;NC_040046.1;NC_040046.1;NC_040046.1;NC_040046.1;NC_040046.1;NC_040046.1;NC_040046.1;NC_040046.1;NC_040046.1;NC_040046.1;NC_040046.1;NC_040046.1;NC_040046.1;NC_040046.1;NC_040046.1;NC_040046.1;NC_040046.1;NC_040046.1;NC_040046.1;NC_040046.1;NC_040046.1;NC_040046.1;NC_040046.1;NC_040046.1;NC_040046.1;NC_040046.1;NC_040046.1;NC_040046.1;NC_040046.1;NC_040046.1;NC_…	118579905;118579905;118579905;118579905;118579905;118579905;118579905;118583336;118583336;118583336;118583336;118583336;118583336;118583336;118583716;118583716;118583716;118583716;118583716;118584837;118584837;118584837;118584837;118584837;118584837;118585797;118585797;118585797;118585797;118585797;118585797;118585797;118587195;118587195;118587195;118587195;118587195;118587195;118587195;118611332…	118582631;118582631;118582631;118582631;118582631;118582631;118582631;118583486;118583486;118583486;118583486;118583486;118583486;118583486;118583838;118583838;118583838;118583838;118583838;118584992;118584992;118584992;118584992;118584992;118584992;118586004;118586004;118586004;118586004;118586004;118586004;118586004;118587358;118587358;118587358;118587358;118587358;118587358;118587358;118611456…	-;-;-;-;-;-;-;-;-;-;-;-;-;-;-;-;-;-;-;-;-;-;-;-;-;-;-;-;-;-;-;-;-;-;-;-;-;-;-;-;-;-;-;-;-;-	4224	17.83758471	21.27626257	20.34821431	7.494526187	9.286305369	8.165143619	1.50E-07	7.62E-06	1.563228838	A0A140T8H1,Immunoglobulin superfamily member 11	NP_001305351.1,immunoglobulin superfamily member 11 precursor	PF13927,Immunoglobulin domain;PF07686,Immunoglobulin V-set domain	IPR007110,Immunoglobulin-like domain;IPR036179,Immunoglobulin-like domain superfamily;IPR013783,Immunoglobulin-like fold;IPR003599,Immunoglobulin subtype;IPR003598,Immunoglobulin subtype 2;IPR013106,Immunoglobulin V-set domain	-	GO:0016021,cellular_component,integral component of membrane;GO:0016020,cellular_component,membrane	-
IRF6	NC_040072.1;NC_040072.1;NC_040072.1;NC_040072.1;NC_040072.1;NC_040072.1;NC_040072.1;NC_040072.1;NC_040072.1;NC_040072.1;NC_040072.1;NC_040072.1;NC_040072.1;NC_040072.1;NC_040072.1;NC_040072.1;NC_040072.1;NC_040072.1;NC_040072.1;NC_040072.1;NC_040072.1;NC_040072.1;NC_040072.1;NC_040072.1;NC_040072.1	1493426;1493426;1493426;1494293;1494293;1494293;1494802;1494802;1494802;1495503;1495503;1495503;1495755;1495755;1495755;1496328;1496328;1496328;1497205;1497205;1497205;1499721;1500536;1500536;1500926	1494012;1494012;1494012;1494411;1494411;1494411;1495194;1495194;1495194;1495649;1495649;1495649;1495877;1495877;1495877;1496532;1496532;1496532;1497381;1497381;1497381;1499821;1500690;1500692;1501066	-;-;-;-;-;-;-;-;-;-;-;-;-;-;-;-;-;-;-;-;-;-;-;-;-	2150	0.336286868	0.144916759	0.119453614	11.32781793	10.30987265	8.561769113	1.48E-07	7.62E-06	-5.313434638	A0A087QPK9,Interferon regulatory factor 6	XP_009271013.1,interferon regulatory factor 6	PF00605,Interferon regulatory factor transcription factor;PF10401,Interferon-regulatory factor 3	IPR019817,Interferon regulatory factor, conserved site;IPR017855,SMAD-like domain superfamily;IPR036388,Winged helix-like DNA-binding domain superfamily;IPR019471,Interferon regulatory factor-3;IPR008984,SMAD/FHA domain superfamily;IPR036390,Winged helix DNA-binding domain superfamily;IPR001346,Interferon regulatory factor DNA-binding domain	-	GO:0003677,molecular_function,DNA binding;GO:0003700,molecular_function,DNA binding transcription factor activity;GO:0006355,biological_process,regulation of transcription, DNA-templated;GO:0044212,molecular_function,transcription regulatory region DNA binding;GO:0006351,biological_process,transcription, DNA-templated;GO:0005634,cellular_component,nucleus	-
LGALS1	NC_040046.1;NC_040046.1;NC_040046.1;NC_040046.1;NC_040046.1;NC_040046.1;NC_040046.1	149179378;149179612;149180881;149180881;149181944;149181944;149182420	149179763;149179763;149180960;149180960;149182005;149182115;149182632	+;+;+;+;+;+;+	851	3.577298618	4.596882956	4.627482355	35.70958222	27.46424078	28.9824331	1.52E-07	7.62E-06	-2.53977768	U3J7Z8,Galectin	XP_005016019.1,galectin-1	PF00337,alactoside-binding lectin	IPR001079,Galectin, carbohydrate recognition domain;IPR013320,Concanavalin A-like lectin/glucanase domain superfamily	-	GO:0031295,biological_process,T cell costimulation;GO:0045445,biological_process,myoblast differentiation;GO:0031012,cellular_component,extracellular matrix;GO:0030246,molecular_function,carbohydrate binding;GO:0046598,biological_process,positive regulation of viral entry into host cell;GO:0005622,cellular_component,intracellular;GO:0002317,biological_process,plasma cell differentiation;GO:000557…	-
LOC113839962	NC_040073.1;NC_040073.1;NC_040073.1;NC_040073.1;NC_040073.1	2844919;2844919;2847744;2847744;2848585	2845266;2845266;2851096;2847904;2851097	-;-;-;-;-	3702	1.685785063	1.814177925	2.79811433	0.141734102	0.153283466	0.129997236	1.51E-07	7.62E-06	4.179751275	-	-	-	-	-	-	-
LOC113845772	NC_040066.1;NC_040066.1	2219907;2220754	2220495;2222540	+;+	2376	27.8834882	23.9826935	23.67202621	7.526731026	7.732057354	6.599630294	1.52E-07	7.62E-06	2.106197585	R0JVX1,Uncharacterized protein	-	-	-	-	-	-
PHTF2	NC_040046.1;NC_040046.1;NC_040046.1;NC_040046.1;NC_040046.1;NC_040046.1;NC_040046.1;NC_040046.1;NC_040046.1;NC_040046.1;NC_040046.1;NC_040046.1;NC_040046.1;NC_040046.1;NC_040046.1;NC_040046.1;NC_040046.1;NC_040046.1;NC_040046.1;NC_040046.1;NC_040046.1;NC_040046.1;NC_040046.1;NC_040046.1;NC_040046.1;NC_040046.1;NC_040046.1;NC_040046.1;NC_040046.1;NC_040046.1;NC_040046.1;NC_040046.1;NC_040046.1;NC_…	190518440;190518773;190518773;190518773;190518773;190518773;190520616;190524706;190530531;190530531;190530531;190530531;190530531;190530531;190530531;190545056;190545056;190545056;190545056;190545056;190545056;190545056;190545056;190545510;190545510;190545510;190545510;190545510;190545510;190546909;190546909;190546909;190546909;190546909;190546909;190548883;190548883;190548883;190548883;190548883…	190518911;190518911;190518911;190518911;190518911;190518911;190520886;190524748;190530607;190530607;190530607;190530607;190530607;190530607;190530607;190545112;190545112;190545112;190545112;190545112;190545112;190545112;190545112;190545521;190545521;190545521;190545521;190545521;190545521;190546944;190546944;190546944;190546944;190546944;190546944;190548952;190548952;190548952;190548952;190548952…	+;+;+;+;+;+;+;+;+;+;+;+;+;+;+;+;+;+;+;+;+;+;+;+;+;+;+;+;+;+;+;+;+;+;+;+;+;+;+;+;+;+;+;+;+;+;+;+;+;+;+;+;+;+;+;+;+;+;+;+;+;+;+;+;+;+;+;+;+;+;+;+;+;+;+;+;+;+;+;+;+;+;+;+;+;+;+;+;+;+;+;+;+;+;+;+;+;+;+;+;+;+;+;+;+;+;+;+;+;+;+;+;+;+;+;+;+;+;+;+;+;+;+;+;+;+;+;+;+;+;+;+;+;+;+;+;+;+;+;+;+;+;+;+;+;+;+;+;+;+;+;+;+;+	5455	10.24759159	10.56657027	11.04827318	5.210124803	5.389785963	5.653545233	1.48E-07	7.62E-06	1.28592264	U3IY00,Putative homeodomain transcription factor 2	-	PF12129,Male germ-cell putative homeodomain transcription factor	IPR021980,Transcription factor homeodomain, male germ-cell	-	GO:0016021,cellular_component,integral component of membrane;GO:0005783,cellular_component,endoplasmic reticulum;GO:0016020,cellular_component,membrane	-
RNF122	NC_040068.1;NC_040068.1;NC_040068.1;NC_040068.1;NC_040068.1;NC_040068.1;NC_040068.1;NC_040068.1;NC_040068.1;NC_040068.1;NC_040068.1;NC_040068.1	803160;803160;803671;803671;804021;804021;804399;804399;805268;805268;807934;808617	803588;803588;803753;803750;804062;804062;804444;804444;805424;805424;808168;808772	-;-;-;-;-;-;-;-;-;-;-;-	1148	67.58807939	85.52220725	84.4525607	37.55472202	35.21881236	37.55397065	1.51E-07	7.62E-06	1.415641176	A0A1V4KHN0,RING finger protein 122	-	-	IPR001841,Zinc finger, RING-type;IPR013083,Zinc finger, RING/FYVE/PHD-type	-	GO:0016021,cellular_component,integral component of membrane;GO:0016020,cellular_component,membrane	-
RNF217	NC_040048.1;NC_040048.1;NC_040048.1;NC_040048.1;NC_040048.1;NC_040048.1;NC_040048.1	63422671;63431057;63436575;63442316;63448740;63479909;63481211	63429897;63431128;63436776;63442480;63448973;63480782;63481440	-;-;-;-;-;-;-	9004	4.192479557	4.225486989	4.440152577	1.534550274	1.835532902	1.737074348	1.52E-07	7.62E-06	1.646363362	K7G2V1,Ring finger protein 217	-	PF01485,IBR domain, a half RING-finger domain	IPR002867,IBR domain;IPR031127,E3 ubiquitin ligase RBR family;IPR013083,Zinc finger, RING/FYVE/PHD-type	ENOG410XP9Y,-;KOG1815,Predicted E3 ubiquitin ligase	GO:0016567,biological_process,protein ubiquitination;GO:0016740,molecular_function,transferase activity;GO:0046872,molecular_function,metal ion binding;GO:0004842,molecular_function,ubiquitin-protein transferase activity;GO:0016020,cellular_component,membrane;GO:0016021,cellular_component,integral component of membrane	-
931cd4b9-c6f8-45cf-9da9-18fbea60167b	NC_040065.1	2199499	2200044	+	546	29.82949453	28.15171713	30.80962496	100.9838603	104.0594707	115.8319418	1.54E-07	7.66E-06	-1.535845093	U3IJ97,Fibrillin 3	-	PF07645,Calcium-binding EGF domain;PF00683,TB domain;PF12662,Complement Clr-like EGF-like;PF12661,Human growth factor-like EGF	IPR018097,EGF-like calcium-binding, conserved site;IPR011398,Fibrillin;IPR009030,Growth factor receptor cysteine-rich domain superfamily;IPR001881,EGF-like calcium-binding domain;IPR026823,Complement Clr-like EGF domain;IPR000152,EGF-type aspartate/asparagine hydroxylation site;IPR000742,EGF-like domain;IPR013032,EGF-like, conserved site;IPR017878,TB domain;IPR036773,TGF-beta binding (TB) domain …	-	GO:0005578,,;GO:0005201,molecular_function,extracellular matrix structural constituent;GO:0005509,molecular_function,calcium ion binding	-
ASB15	NC_040046.1;NC_040046.1;NC_040046.1;NC_040046.1;NC_040046.1;NC_040046.1;NC_040046.1;NC_040046.1;NC_040046.1;NC_040046.1;NC_040046.1;NC_040046.1;NC_040046.1;NC_040046.1;NC_040046.1;NC_040046.1;NC_040046.1;NC_040046.1;NC_040046.1;NC_040046.1;NC_040046.1;NC_040046.1;NC_040046.1;NC_040046.1;NC_040046.1;NC_040046.1;NC_040046.1	179796336;179796336;179796336;179800925;179800925;179800925;179802641;179802792;179802792;179803241;179803241;179803241;179804136;179804136;179804136;179805003;179805003;179805003;179805552;179805552;179805552;179806679;179806679;179806679;179807984;179807984;179807984	179796456;179796456;179796456;179801053;179801053;179801053;179802693;179802923;179802923;179803399;179803399;179803399;179804381;179804381;179804381;179805174;179805174;179805174;179806122;179806122;179806122;179806832;179806832;179806832;179808275;179808274;179808275	+;+;+;+;+;+;+;+;+;+;+;+;+;+;+;+;+;+;+;+;+;+;+;+;+;+;+	2029	2.92575071	2.951743522	2.995661938	0.387900182	0.3146315	0.27671664	1.54E-07	7.66E-06	3.486561845	R0LZY6,Ankyrin repeat and SOCS box containing 15	XP_005013222.1,ankyrin repeat and SOCS box protein 15 isoform X1	PF12796,Ankyrin repeats (3 copies);PF07525,SOCS box	IPR020683,Ankyrin repeat-containing domain;IPR036036,SOCS box-like domain superfamily;IPR002110,Ankyrin repeat;IPR001496,SOCS box domain;IPR036770,Ankyrin repeat-containing domain superfamily	-	GO:0035556,biological_process,intracellular signal transduction;GO:0005622,cellular_component,intracellular	-
LOC101789635	NC_040046.1	159240641	159242202	+	1562	211.5112733	235.3072728	230.7097689	120.0337217	121.973846	129.1445971	1.54E-07	7.66E-06	1.181804681	A0A226M9H2,Uncharacterized protein	-	-	IPR036390,Winged helix DNA-binding domain superfamily;IPR005819,Histone H5;IPR005818,Linker histone H1/H5, domain H15;IPR036388,Winged helix-like DNA-binding domain superfamily	-	GO:0005694,cellular_component,chromosome;GO:0000786,cellular_component,nucleosome;GO:0003677,molecular_function,DNA binding;GO:0005634,cellular_component,nucleus;GO:0006334,biological_process,nucleosome assembly	-
LOC101804141	NC_040056.1;NC_040056.1;NC_040056.1;NC_040056.1;NC_040056.1;NC_040056.1;NC_040056.1	18342655;18344544;18345821;18346018;18346352;18346644;18346927	18342812;18344622;18345871;18346169;18346465;18346795;18347725	+;+;+;+;+;+;+	1505	0.758541808	0.989114386	1.109212133	8.134878225	7.965113041	10.23255319	1.55E-07	7.68E-06	-2.890254684	A0A1V4K0S8,RNA-binding Raly-like protein	-	-	-	-	-	-
LOC101804932	NC_040061.1;NC_040061.1;NC_040061.1;NC_040061.1;NC_040061.1;NC_040061.1;NC_040061.1;NC_040061.1;NC_040061.1;NC_040061.1;NC_040061.1;NC_040061.1;NC_040061.1;NC_040061.1;NC_040061.1;NC_040061.1;NC_040061.1;NC_040061.1;NC_040061.1;NC_040061.1;NC_040061.1;NC_040061.1;NC_040061.1;NC_040061.1;NC_040061.1;NC_040061.1;NC_040061.1;NC_040061.1;NC_040061.1;NC_040061.1;NC_040061.1;NC_040061.1;NC_040061.1;NC_…	2540275;2540275;2540276;2540276;2540276;2540277;2540278;2540278;2540556;2540556;2540556;2540556;2540556;2540556;2540556;2540556;2540821;2540821;2540821;2540821;2540821;2540821;2540821;2540821;2541788;2541788;2541788;2541788;2541788;2541788;2541788;2541788;2542893;2542893;2542893;2542893;2542893;2542893;2542893;2542893;2544375;2544375;2544375;2544375;2544375;2544375;2544375;2544375;2545060;2545060…	2540431;2540431;2540431;2540431;2540431;2540431;2540431;2540431;2540730;2540730;2540730;2540730;2540730;2540730;2540730;2540730;2540957;2540957;2540957;2540957;2540957;2540957;2540957;2540957;2541974;2541974;2541974;2541974;2541974;2541974;2541974;2541974;2543056;2543056;2543056;2543056;2543056;2543056;2543056;2543056;2544544;2544544;2544544;2544544;2544544;2544544;2544544;2544544;2545221;2545221…	+;+;+;+;+;+;+;+;+;+;+;+;+;+;+;+;+;+;+;+;+;+;+;+;+;+;+;+;+;+;+;+;+;+;+;+;+;+;+;+;+;+;+;+;+;+;+;+;+;+;+;+;+;+;+;+;+;+;+;+;+;+;+;+;+;+;+;+;+;+;+;+;+;+;+;+;+;+;+;+;+;+;+;+;+;+;+;+;+;+;+;+;+;+;+;+;+;+;+;+;+;+;+;+;+;+;+;+;+;+;+;+;+;+;+;+;+;+;+;+;+;+;+;+;+;+;+;+;+;+;+;+;+;+;+;+;+;+;+;+;+;+;+;+;+;+;+;+;+;+;+;+;+;+;+;+;+;+;+;+;+;+;+;+;+;+;+;+;+;+;+	5893	10.93239424	8.623909238	7.619483821	1.535901728	1.751331226	1.422325942	1.57E-07	7.72E-06	2.848955362	A0A0Q3LV93,E1A-binding protein p400 isoform X7	-	PF07529,HSA;PF00271,Helicase conserved C-terminal domain;PF00176,SNF2 family N-terminal domain;PF15790,1A-binding protein p400, N-terminal	IPR001005,SANT/Myb domain;IPR027417,P-loop containing nucleoside triphosphate hydrolase;IPR014012,Helicase/SANT-associated domain;IPR031575,E1A-binding protein p400, N-terminal;IPR017877,Myb-like domain;IPR038718,SNF2-like, N-terminal domain superfamily;IPR000330,SNF2-related, N-terminal domain;IPR014001,Helicase superfamily 1/2, ATP-binding domain;IPR001650,Helicase, C-terminal	-	GO:0005524,molecular_function,ATP binding	-
SEMA6B	NC_040065.1;NC_040065.1;NC_040065.1;NC_040065.1;NC_040065.1;NC_040065.1;NC_040065.1;NC_040065.1;NC_040065.1;NC_040065.1;NC_040065.1;NC_040065.1;NC_040065.1;NC_040065.1;NC_040065.1;NC_040065.1;NC_040065.1;NC_040065.1;NC_040065.1;NC_040065.1;NC_040065.1;NC_040065.1;NC_040065.1;NC_040065.1;NC_040065.1;NC_040065.1;NC_040065.1;NC_040065.1;NC_040065.1;NC_040065.1;NC_040065.1;NC_040065.1;NC_040065.1;NC_…	2388029;2396895;2396895;2396896;2399534;2399933;2399933;2399933;2399933;2399933;2400324;2400324;2400324;2400324;2400324;2400702;2400702;2400702;2400702;2400702;2400878;2400878;2400878;2400878;2400878;2401198;2401198;2401198;2401198;2401198;2401671;2401671;2401671;2401671;2401671;2401897;2401897;2401897;2401897;2401897;2402117;2402117;2402117;2402117;2402117;2402314;2402314;2402314;2402314;2402314…	2388146;2397122;2397122;2397122;2399809;2400079;2400079;2400079;2400079;2400079;2400453;2400453;2400453;2400453;2400453;2400762;2400762;2400762;2400762;2400762;2400940;2400940;2400940;2400940;2400940;2401299;2401299;2401299;2401299;2401299;2401761;2401761;2401761;2401761;2401761;2402016;2402016;2402016;2402016;2402016;2402205;2402205;2402205;2402205;2402205;2402531;2402531;2402531;2402531;2402531…	+;+;+;+;+;+;+;+;+;+;+;+;+;+;+;+;+;+;+;+;+;+;+;+;+;+;+;+;+;+;+;+;+;+;+;+;+;+;+;+;+;+;+;+;+;+;+;+;+;+;+;+;+;+;+;+;+;+;+;+;+;+;+;+;+;+;+;+;+;+;+;+;+;+;+;+;+;+;+;+;+;+;+;+;+;+	4356	20.92244402	27.99084718	26.27604736	10.82082602	10.67398441	10.19175643	1.60E-07	7.84E-06	1.553249659	E1BV84,Semaphorin 6B	XP_015155498.1,-;NP_001305955.1,semaphorin-6B precursor;XP_015155499.1,-;XP_015155500.1,-	PF01437,Plexin repeat;PF01403,Sema domain	IPR001627,Sema domain;IPR036352,Sema domain superfamily;IPR016201,PSI domain;IPR002165,Plexin repeat;IPR015943,WD40/YVTN repeat-like-containing domain superfamily;IPR027231,Semaphorin	KOG3611,Semaphorins;ENOG410XQZC,-	GO:0030215,molecular_function,semaphorin receptor binding;GO:0005887,cellular_component,integral component of plasma membrane;GO:0016021,cellular_component,integral component of membrane;GO:0016020,cellular_component,membrane	K06842,ko04360,Axon guidance
FJX1	NC_040050.1	53470568	53473277	+	2710	2.682000437	3.972881951	4.106677145	18.40966468	18.87155612	21.60592436	1.61E-07	7.87E-06	-2.14406464	A0A0Q3QSC0,Four-jointed box protein 1	-	-	IPR024868,Four-jointed box protein 1/four-jointed protein	-	-	-
GPX3	NC_040059.1;NC_040059.1;NC_040059.1;NC_040059.1;NC_040059.1	7841255;7842089;7842361;7842566;7842761	7841461;7842242;7842478;7842665;7843384	+;+;+;+;+	1203	239.3290834	294.6212451	299.6294825	93.62886443	111.763476	89.47591958	1.62E-07	7.91E-06	1.806331016	F1NPJ8,Glutathione peroxidase	-	PF00255,lutathione peroxidase	IPR000889,Glutathione peroxidase;IPR036249,Thioredoxin-like superfamily;IPR029760,Glutathione peroxidase conserved site	KOG1651,Glutathione peroxidase;COG0386,Glutathione peroxidase	GO:0016491,molecular_function,oxidoreductase activity;GO:0098869,biological_process,cellular oxidant detoxification;GO:0004602,molecular_function,glutathione peroxidase activity;GO:0006979,biological_process,response to oxidative stress;GO:0055114,biological_process,oxidation-reduction process;GO:0004601,molecular_function,peroxidase activity	-
COL9A3	NC_040066.1;NC_040066.1;NC_040066.1;NC_040066.1;NC_040066.1;NC_040066.1;NC_040066.1;NC_040066.1;NC_040066.1;NC_040066.1;NC_040066.1;NC_040066.1;NC_040066.1;NC_040066.1;NC_040066.1;NC_040066.1;NC_040066.1;NC_040066.1;NC_040066.1;NC_040066.1;NC_040066.1;NC_040066.1;NC_040066.1;NC_040066.1;NC_040066.1;NC_040066.1;NC_040066.1;NC_040066.1;NC_040066.1;NC_040066.1;NC_040066.1;NC_040066.1;NC_040066.1;NC_…	12962526;12962526;12965390;12965399;12969056;12969056;12969580;12969580;12970424;12970424;12974302;12974302;12975625;12975625;12976181;12976181;12976887;12976887;12978034;12978034;12979466;12979466;12981000;12981000;12981520;12981520;12982094;12982094;12982912;12982912;12984027;12984027;12984909;12984909;12985263;12985263;12985976;12985976;12986723;12986723;12987213;12987213;12987662;12987662;129…	12964216;12964216;12965467;12965467;12969091;12969091;12969651;12969651;12970477;12970477;12974337;12974337;12975648;12975648;12976234;12976234;12976940;12976940;12978075;12978075;12979522;12979522;12981053;12981053;12981573;12981573;12982147;12982147;12982965;12982965;12984080;12984080;12984962;12984962;12985316;12985316;12986029;12986029;12986767;12986767;12987266;12987266;12987715;12987715;129…	+;+;+;+;+;+;+;+;+;+;+;+;+;+;+;+;+;+;+;+;+;+;+;+;+;+;+;+;+;+;+;+;+;+;+;+;+;+;+;+;+;+;+;+;+;+;+;+;+;+;+;+;+;+;+;+;+;+;+;+;+;+;+;+	3667	0.705655565	0.330424086	1.0272077	159.2676385	108.9415312	118.2454432	1.64E-07	7.99E-06	-7.26175991	-	-	-	-	-	-	-
EGFR	NC_040047.1;NC_040047.1;NC_040047.1;NC_040047.1;NC_040047.1;NC_040047.1;NC_040047.1;NC_040047.1;NC_040047.1;NC_040047.1;NC_040047.1;NC_040047.1;NC_040047.1;NC_040047.1;NC_040047.1;NC_040047.1;NC_040047.1;NC_040047.1;NC_040047.1;NC_040047.1;NC_040047.1;NC_040047.1;NC_040047.1;NC_040047.1;NC_040047.1;NC_040047.1;NC_040047.1;NC_040047.1;NC_040047.1;NC_040047.1;NC_040047.1;NC_040047.1;NC_040047.1;NC_…	56493653;56493654;56604032;56604032;56606083;56606083;56607128;56607128;56609072;56609072;56612335;56612335;56613386;56613386;56614405;56614405;56615093;56615093;56615316;56615316;56616572;56616572;56617306;56617306;56618129;56618129;56619869;56619869;56621867;56621867;56627609;56627609;56629097;56629097;56630992;56630992;56631853;56631853;56636234;56636234;56639855;56639855;56640839;56640839;566…	56494106;56494106;56604183;56604183;56606269;56606269;56607262;56607262;56609140;56609140;56612453;56612453;56613527;56613527;56614521;56614521;56615219;56615219;56615389;56615389;56616662;56616662;56617505;56617505;56618261;56618261;56619968;56619968;56622024;56622024;56627644;56627644;56629238;56629238;56631114;56631114;56631951;56631951;56636419;56636419;56640010;56640010;56640914;56640914;566…	+;+;+;+;+;+;+;+;+;+;+;+;+;+;+;+;+;+;+;+;+;+;+;+;+;+;+;+;+;+;+;+;+;+;+;+;+;+;+;+;+;+;+;+;+;+;+;+;+;+;+;+;+;+;+;+	11422	2.505361807	3.240038062	3.050484012	8.835338104	9.579101078	10.05939257	1.67E-07	8.04E-06	-1.383985345	R0LGI4,Receptor protein-tyrosine kinase	-	PF14843,rowth factor receptor domain IV;PF00757,urin-like cysteine rich region;PF01030,Receptor L domain;PF07714,Protein tyrosine kinase	IPR032778,Growth factor receptor domain 4;IPR001245,Serine-threonine/tyrosine-protein kinase, catalytic domain;IPR006212,Furin-like repeat;IPR000494,Receptor L-domain;IPR016245,Tyrosine protein kinase, EGF/ERB/XmrK receptor;IPR020635,Tyrosine-protein kinase, catalytic domain;IPR009030,Growth factor receptor cysteine-rich domain superfamily;IPR011009,Protein kinase-like domain superfamily;IPR01744…	-	GO:0016301,molecular_function,kinase activity;GO:0016310,biological_process,phosphorylation;GO:0023014,biological_process,signal transduction by protein phosphorylation;GO:0035556,biological_process,intracellular signal transduction;GO:0000166,molecular_function,nucleotide binding;GO:0005622,cellular_component,intracellular;GO:0016740,molecular_function,transferase activity;GO:0004714,molecular_f…	-
MICALL1	NC_040046.1;NC_040046.1;NC_040046.1;NC_040046.1;NC_040046.1;NC_040046.1;NC_040046.1;NC_040046.1;NC_040046.1;NC_040046.1;NC_040046.1;NC_040046.1;NC_040046.1;NC_040046.1;NC_040046.1;NC_040046.1;NC_040046.1	149254165;149258143;149259735;149261101;149261635;149263509;149263717;149264314;149264454;149264975;149265676;149265913;149266251;149266617;149266818;149267070;149267401	149254402;149258191;149259876;149261204;149261762;149263714;149264082;149264377;149264848;149265264;149265810;149266039;149266341;149266690;149266932;149267116;149268972	+;+;+;+;+;+;+;+;+;+;+;+;+;+;+;+;+	4143	74.08632496	73.64998717	68.67477569	29.69878515	32.38419839	35.93207691	1.66E-07	8.04E-06	1.461814317	A0A218UZZ8,MICAL-like protein 1	-	-	IPR028563,MICAL-like protein;IPR001715,Calponin homology domain;IPR022735,Domain of unknown function DUF3585;IPR036872,CH domain superfamily;IPR001781,Zinc finger, LIM-type	-	GO:0032456,biological_process,endocytic recycling;GO:0005622,cellular_component,intracellular;GO:0046872,molecular_function,metal ion binding;GO:0017137,molecular_function,Rab GTPase binding	-
PACSIN3	NC_040050.1;NC_040050.1;NC_040050.1;NC_040050.1;NC_040050.1;NC_040050.1;NC_040050.1;NC_040050.1;NC_040050.1;NC_040050.1;NC_040050.1;NC_040050.1;NC_040050.1;NC_040050.1;NC_040050.1;NC_040050.1;NC_040050.1;NC_040050.1;NC_040050.1;NC_040050.1;NC_040050.1;NC_040050.1;NC_040050.1	35876620;35876625;35887146;35887146;35888459;35888459;35888981;35888981;35889647;35889647;35890235;35890235;35890922;35890922;35891862;35891862;35892551;35892551;35893360;35893939;35893939;35895699;35895699	35876694;35876694;35887220;35887220;35888559;35888559;35889137;35889137;35889882;35889882;35890390;35890390;35891097;35891097;35891982;35891982;35892687;35892687;35893422;35894099;35894099;35896013;35896013	+;+;+;+;+;+;+;+;+;+;+;+;+;+;+;+;+;+;+;+;+;+;+	1773	555.2636559	446.9619905	462.8552444	113.9611328	124.2808919	96.87877198	1.67E-07	8.04E-06	2.446400203	U3IK76,Protein kinase C and casein kinase substrate in neurons 3	-	PF14604,Variant SH3 domain;PF00611,es/CIP4, and EFC/F-BAR homology domain	IPR028523,Protein kinase C and casein kinase substrate in neurons protein 3;IPR031160,F-BAR domain;IPR001060,FCH domain;IPR027267,AH/BAR domain superfamily;IPR036028,SH3-like domain superfamily;IPR001452,SH3 domain	-	GO:0097320,biological_process,plasma membrane tubulation;GO:0005737,cellular_component,cytoplasm;GO:0045806,biological_process,negative regulation of endocytosis;GO:0065009,biological_process,regulation of molecular function;GO:0051926,biological_process,negative regulation of calcium ion transport;GO:0005886,cellular_component,plasma membrane;GO:0008289,molecular_function,lipid binding;GO:000809…	-
SLC8A3	NC_040050.1;NC_040050.1;NC_040050.1;NC_040050.1;NC_040050.1;NC_040050.1;NC_040050.1	40649436;40668019;40724849;40735062;40741950;40742545;40742980	40649824;40669830;40724955;40735079;40742074;40742895;40745472	+;+;+;+;+;+;+	5295	25.20371554	22.84396567	24.8741378	10.97459599	10.63643957	10.80047479	1.68E-07	8.04E-06	1.486916736	F1P023,Solute carrier family 8 member A3	NP_001280026.1,sodium/calcium exchanger 3 precursor	PF01699,Sodium/calcium exchanger protein;PF16494,C-terminal extension of sodium/calcium exchanger domain;PF03160,Calx-beta domain	IPR038081,CalX-like domain superfamily;IPR004836,Sodium/calcium exchanger protein;IPR003644,Na-Ca exchanger/integrin-beta4;IPR032452,Sodium/calcium exchanger domain, C-terminal extension;IPR004837,Sodium/calcium exchanger membrane region	KOG1306,Ca2+/Na+ exchanger NCX1 and related proteins;ENOG410XPJP,-	GO:0060078,biological_process,regulation of postsynaptic membrane potential;GO:0030001,biological_process,metal ion transport;GO:0005789,cellular_component,endoplasmic reticulum membrane;GO:0031226,cellular_component,intrinsic component of plasma membrane;GO:0006874,biological_process,cellular calcium ion homeostasis;GO:0042383,cellular_component,sarcolemma;GO:0015368,molecular_function,calcium:c…	K05849,ko04974,Protein digestion and absorption;K05849,ko04020,Calcium signaling pathway;K05849,ko04022,cGMP-PKG signaling pathway;K05849,ko04740,Olfactory transduction
AHCY	NC_040066.1;NC_040066.1;NC_040066.1;NC_040066.1;NC_040066.1;NC_040066.1;NC_040066.1;NC_040066.1;NC_040066.1;NC_040066.1	2180349;2182147;2185184;2187897;2193456;2194377;2195426;2196364;2201328;2205191	2180499;2182337;2185259;2188049;2193568;2194584;2195513;2196481;2201522;2206174	+;+;+;+;+;+;+;+;+;+	2277	915.5404743	827.359215	832.3605135	289.6563261	319.6609295	287.1400583	1.70E-07	8.11E-06	1.839979895	A0A0A0B0R4,Adenosylhomocysteinase	-	PF07991,Acetohydroxy acid isomeroreductase, NADPH-binding domain;PF05221,S-adenosyl-L-homocysteine hydrolase;PF00670,S-adenosyl-L-homocysteine hydrolase, NAD binding domain;PF02826,-isomer specific 2-hydroxyacid dehydrogenase, NAD binding domain	IPR000043,Adenosylhomocysteinase-like;IPR036291,NAD(P)-binding domain superfamily;IPR020082,S-adenosyl-L-homocysteine hydrolase, conserved site;IPR034373,Adenosylhomocysteinase;IPR015878,S-adenosyl-L-homocysteine hydrolase, NAD binding domain	-	GO:0051287,molecular_function,NAD binding;GO:0006730,biological_process,one-carbon metabolic process;GO:0016787,molecular_function,hydrolase activity;GO:0004013,molecular_function,adenosylhomocysteinase activity;GO:0019510,biological_process,S-adenosylhomocysteine catabolic process	-
FBLN1	NC_040046.1;NC_040046.1;NC_040046.1;NC_040046.1;NC_040046.1;NC_040046.1;NC_040046.1;NC_040046.1;NC_040046.1;NC_040046.1;NC_040046.1;NC_040046.1;NC_040046.1;NC_040046.1;NC_040046.1;NC_040046.1;NC_040046.1;NC_040046.1;NC_040046.1;NC_040046.1;NC_040046.1;NC_040046.1;NC_040046.1;NC_040046.1;NC_040046.1;NC_040046.1;NC_040046.1;NC_040046.1;NC_040046.1;NC_040046.1;NC_040046.1;NC_040046.1;NC_040046.1;NC_…	131686823;131686825;131686826;131686829;131686832;131687500;131688055;131688055;131688055;131688055;131688055;131688055;131702466;131702466;131702466;131702466;131702466;131702466;131710268;131710268;131710268;131710268;131710268;131710268;131721889;131721889;131721889;131721889;131721889;131721889;131724452;131724452;131724452;131724452;131724452;131724452;131726051;131726051;131726051;131726051…	131686966;131686966;131686966;131686966;131686966;131687699;131688265;131688265;131688265;131688265;131688265;131688265;131702565;131702565;131702565;131702565;131702565;131702565;131710403;131710403;131710403;131710403;131710403;131710403;131722060;131722060;131722060;131722060;131722060;131722060;131724511;131724511;131724511;131724511;131724511;131724511;131726131;131726131;131726131;131726131…	+;+;+;+;+;+;+;+;+;+;+;+;+;+;+;+;+;+;+;+;+;+;+;+;+;+;+;+;+;+;+;+;+;+;+;+;+;+;+;+;+;+;+;+;+;+;+;+;+;+;+;+;+;+;+;+;+;+;+;+;+;+;+;+;+;+;+;+;+;+;+;+;+;+;+;+;+;+;+;+;+;+;+;+;+;+;+;+;+;+;+;+;+;+;+;+;+;+;+;+;+;+;+;+;+;+	4713	4.545751837	5.986524051	6.003306596	21.01359179	20.67907137	26.18299621	1.71E-07	8.14E-06	-1.725229796	F1NX60,Fibulin-1	-	PF07645,Calcium-binding EGF domain;PF01821,Anaphylotoxin-like domain;PF12662,Complement Clr-like EGF-like	IPR018097,EGF-like calcium-binding, conserved site;IPR000020,Anaphylatoxin/fibulin;IPR009030,Growth factor receptor cysteine-rich domain superfamily;IPR001881,EGF-like calcium-binding domain;IPR026823,Complement Clr-like EGF domain;IPR000152,EGF-type aspartate/asparagine hydroxylation site;IPR000742,EGF-like domain;IPR013032,EGF-like, conserved site;IPR017048,Fibulin-1	ENOG410Y194,-;ENOG410IR7F,-	GO:0005578,,;GO:0007162,biological_process,negative regulation of cell adhesion;GO:0005509,molecular_function,calcium ion binding;GO:2000647,biological_process,negative regulation of stem cell proliferation;GO:0005615,cellular_component,extracellular space;GO:2000146,biological_process,negative regulation of cell motility;GO:0031012,cellular_component,extracellular matrix;GO:0072378,biological_pr…	-
LOC110354585	NW_020866968.1;NW_020866968.1;NW_020866968.1;NW_020866968.1;NW_020866968.1;NW_020866968.1;NW_020866968.1;NW_020866968.1;NW_020866968.1;NW_020866968.1;NW_020866968.1;NW_020866968.1;NW_020866968.1;NW_020866968.1;NW_020866968.1;NW_020866968.1;NW_020866968.1;NW_020866968.1;NW_020866968.1;NW_020866968.1;NW_020866968.1;NW_020866968.1;NW_020866968.1;NW_020866968.1;NW_020866968.1;NW_020866968.1;NW_020866…	35607;35612;35619;35674;35874;35874;35891;36033;36033;36033;36131;36131;36131;36131;36131;36131;36131;37550;37550;37550;37550;37550;37550;37550;37550;37550;37550;42251;62006;62006;62006;62006;65045;65045;69685;69685;70761;77264;77264;77264;77264;77264	35867;35867;35867;35867;36026;36026;36026;36171;36171;36171;36171;36171;36171;36171;36171;36171;36171;37612;37612;37612;37612;37612;37612;37612;37612;37612;37612;42460;62089;62089;62089;62089;68979;68979;69860;70126;71324;79839;79809;79839;79839;79808	+;+;+;+;+;+;+;+;+;+;+;+;+;+;+;+;+;+;+;+;+;+;+;+;+;+;+;+;+;+;+;+;+;+;+;+;+;+;+;+;+;+	8427	9.135191518	9.230912645	9.305484275	2.890092387	3.834044299	3.155221269	1.72E-07	8.14E-06	1.799252954	A0A1U8DIQ2,uncharacterized protein LOC106722768	XP_014380191.1,uncharacterized protein LOC106722768	-	IPR018154,TLV/ENV coat polyprotein	-	GO:0016021,cellular_component,integral component of membrane;GO:0016020,cellular_component,membrane	-
TFAP2A	NC_040047.1;NC_040047.1;NC_040047.1;NC_040047.1;NC_040047.1;NC_040047.1	66643785;66648578;66651952;66653636;66656139;66657843	66644654;66649012;66652073;66653880;66656280;66658159	+;+;+;+;+;+	2131	0.142856927	0.016245426	0.060259331	17.27659556	13.11458376	10.06838047	1.72E-07	8.14E-06	-7.200668526	K7FBS0,Transcription factor AP-2 alpha	-	PF03299,Transcription factor AP-2	IPR004979,Transcription factor AP-2;IPR008121,Transcription factor AP-2 alpha, N-terminal;IPR013854,Transcription factor AP-2, C-terminal	KOG3811,Transcription factor AP-2;ENOG410XR9E,-	GO:0046983,molecular_function,protein dimerization activity;GO:0007605,biological_process,sensory perception of sound;GO:0001078,molecular_function,transcriptional repressor activity, RNA polymerase II proximal promoter sequence-specific DNA binding;GO:0008285,biological_process,negative regulation of cell proliferation;GO:0000122,biological_process,negative regulation of transcription by RNA pol…	-
CSRNP1	NC_040047.1;NC_040047.1;NC_040047.1;NC_040047.1;NC_040047.1;NC_040047.1;NC_040047.1;NC_040047.1;NC_040047.1;NC_040047.1;NC_040047.1;NC_040047.1;NC_040047.1;NC_040047.1	5228773;5229265;5234235;5234529;5234529;5236870;5236870;5236870;5237265;5237265;5237265;5238560;5238560;5238560	5228963;5230360;5234724;5234724;5234724;5237129;5237129;5237129;5237561;5237561;5237561;5241598;5241598;5241598	+;+;+;+;+;+;+;+;+;+;+;+;+;+	5373	3.902379721	4.671278157	4.007168905	12.96368471	14.81873897	14.42793908	1.75E-07	8.23E-06	-1.433077761	U3I2C8,Cysteine and serine rich nuclear protein 1	-	PF16019,Cysteine/serine-rich nuclear protein N-terminus	IPR031972,Cysteine/serine-rich nuclear protein, N-terminal domain;IPR023260,Cysteine/serine-rich nuclear protein family	-	-	-
INKA2	NC_040072.1;NC_040072.1;NC_040072.1;NC_040072.1;NC_040072.1;NC_040072.1	1635239;1635239;1635239;1638716;1644075;1645777	1637114;1637114;1637114;1638816;1644094;1645918	-;-;-;-;-;-	2139	75.62668921	70.27382571	64.9167195	27.18756929	25.53416613	24.05498875	1.75E-07	8.23E-06	1.773798426	U3J2A4,Family with sequence similarity 212 member B	-	PF15342,AM212 family	IPR029267,FAM212 domain	-	GO:0019901,molecular_function,protein kinase binding;GO:0005634,cellular_component,nucleus	-
LOC106018120	NC_040047.1;NC_040047.1	111200085;111206177	111205678;111206345	+;+	5763	2.86573401	2.82334403	2.629306085	0.629736691	0.467710065	0.480164179	1.75E-07	8.23E-06	2.714134893	A0A093GP43,Dystrobrevin alpha	-	PF00569,Zinc finger, ZZ type;PF09068,hand;PF09069,-hand	IPR011992,EF-hand domain pair;IPR000433,Zinc finger, ZZ-type;IPR015154,EF-hand domain, type 2;IPR015153,EF-hand domain, type 1;IPR017432,Distrobrevin	-	GO:0008270,molecular_function,zinc ion binding	-
LOC113839973	NC_040046.1;NC_040046.1	63562756;63568370	63562976;63571842	+;+	3694	0.103014386	0.056230109	0.092699971	2.024084989	1.891389956	1.878185565	1.77E-07	8.26E-06	-4.201021032	R0KXZ0,Uncharacterized protein	-	-	-	-	-	-
PAK1	NC_040046.1;NC_040046.1;NC_040046.1;NC_040046.1;NC_040046.1;NC_040046.1;NC_040046.1;NC_040046.1;NC_040046.1;NC_040046.1;NC_040046.1;NC_040046.1;NC_040046.1;NC_040046.1;NC_040046.1;NC_040046.1;NC_040046.1;NC_040046.1;NC_040046.1;NC_040046.1;NC_040046.1;NC_040046.1;NC_040046.1;NC_040046.1;NC_040046.1;NC_040046.1;NC_040046.1;NC_040046.1;NC_040046.1;NC_040046.1;NC_040046.1;NC_040046.1;NC_040046.1;NC_…	3040782;3040782;3040782;3040782;3040782;3040782;3040782;3040782;3040782;3046086;3046086;3046086;3046086;3046086;3046086;3046086;3046086;3046086;3048294;3048294;3048294;3048294;3048294;3048294;3048294;3048294;3048294;3051389;3051389;3051389;3051389;3051389;3051389;3051389;3051389;3051389;3051895;3051895;3051895;3051895;3051895;3051895;3051895;3051895;3051895;3055384;3055384;3055384;3055384;3055384…	3044542;3044542;3044542;3044542;3044542;3044542;3044542;3044542;3044542;3046223;3046223;3046223;3046223;3046223;3046223;3046223;3046223;3046223;3048490;3048490;3048490;3048490;3048490;3048490;3048490;3048490;3048490;3051488;3051488;3051488;3051488;3051488;3051488;3051488;3051488;3051488;3052012;3052012;3052012;3052012;3052012;3052012;3052012;3052012;3052012;3055496;3055496;3055496;3055496;3055496…	-;-;-;-;-;-;-;-;-;-;-;-;-;-;-;-;-;-;-;-;-;-;-;-;-;-;-;-;-;-;-;-;-;-;-;-;-;-;-;-;-;-;-;-;-;-;-;-;-;-;-;-;-;-;-;-;-;-;-;-;-;-;-;-;-;-;-;-;-;-;-;-;-;-;-;-;-;-;-;-;-;-;-;-;-;-;-;-;-;-;-;-;-;-;-;-;-;-;-;-;-;-;-;-;-;-;-;-;-;-;-;-;-;-;-;-;-;-;-;-;-;-;-;-;-;-;-;-;-;-;-;-;-;-;-;-;-;-;-;-	6116	0.379539627	0.464152761	0.30794397	3.045591468	2.899440968	3.554030055	1.77E-07	8.26E-06	-2.720462186	E1C3P6,p21	XP_015136342.1,-;XP_015136340.1,-;NP_001155844.1,serine/threonine-protein kinase PAK 1;XP_015136341.1,-;XP_015136339.1,-	PF00069,Protein kinase domain;PF00786,P21-Rho-binding domain	IPR000095,CRIB domain;IPR036936,CRIB domain superfamily;IPR011009,Protein kinase-like domain superfamily;IPR033923,p21 activated kinase binding domain;IPR017441,Protein kinase, ATP binding site;IPR008271,Serine/threonine-protein kinase, active site;IPR000719,Protein kinase domain	ENOG410XP4K,-;KOG0578,p21-activated serine/threonine protein kinase	GO:0001726,cellular_component,ruffle;GO:0050770,biological_process,regulation of axonogenesis;GO:0033148,biological_process,positive regulation of intracellular estrogen receptor signaling pathway;GO:0033138,biological_process,positive regulation of peptidyl-serine phosphorylation;GO:0031532,biological_process,actin cytoskeleton reorganization;GO:0005518,molecular_function,collagen binding;GO:004…	K04409,ko04062,Chemokine signaling pathway;K04409,ko04011,MAPK signaling pathway - yeast;K04409,ko04392,Hippo signaling pathway -multiple species;K04409,ko05211,Renal cell carcinoma;K04409,ko04650,Natural killer cell mediated cytotoxicity;K04409,ko04360,Axon guidance;K04409,ko04014,Ras signaling pathway;K04409,ko04012,ErbB signaling pathway;K04409,ko05120,Epithelial cell signaling in Helicobacter…
LOC113842404	NC_040046.1;NC_040046.1;NC_040046.1;NC_040046.1;NC_040046.1	119040664;119040669;119045825;119045825;119046866	119042125;119042125;119049230;119045963;119049230	+;+;+;+;+	4868	41.21161176	42.62660373	42.28542614	14.13786021	18.16282725	14.63125833	1.79E-07	8.34E-06	1.739227002	A0A091RPW9,Calsequestrin	-	PF01216,Calsequestrin	IPR018233,Calsequestrin, conserved site;IPR001393,Calsequestrin;IPR036249,Thioredoxin-like superfamily	-	GO:0005509,molecular_function,calcium ion binding	-
IGFBP7	NC_040049.1;NC_040049.1;NC_040049.1;NC_040049.1;NC_040049.1	12389656;12392346;12393085;12394132;12405753	12389893;12392472;12393201;12394241;12406265	-;-;-;-;-	1105	101.6597045	105.3608224	112.685477	54.68589066	57.80470354	56.54503297	1.82E-07	8.42E-06	1.232983884	A0A0Q3MG80,Insulin-like growth factor-binding protein 7 isoform X1	-	PF07648,Kazal-type serine protease inhibitor domain;PF00219,Insulin-like growth factor binding protein;PF07679,Immunoglobulin I-set domain	IPR007110,Immunoglobulin-like domain;IPR000867,Insulin-like growth factor-binding protein, IGFBP;IPR002350,Kazal domain;IPR011390,Insulin-like growth factor binding protein-related protein (IGFBP-rP), MAC25;IPR009030,Growth factor receptor cysteine-rich domain superfamily;IPR036179,Immunoglobulin-like domain superfamily;IPR036058,Kazal domain superfamily;IPR003599,Immunoglobulin subtype;IPR013098…	-	GO:0001558,biological_process,regulation of cell growth;GO:0005520,molecular_function,insulin-like growth factor binding;GO:0005576,cellular_component,extracellular region	-
LOC101802071	NC_040064.1;NC_040064.1;NC_040064.1;NC_040064.1;NC_040064.1;NC_040064.1;NC_040064.1;NC_040064.1;NC_040064.1;NC_040064.1;NC_040064.1;NC_040064.1;NC_040064.1;NC_040064.1;NC_040064.1	7030905;7031605;7031938;7032174;7033945;7034071;7034287;7034509;7034652;7034857;7035037;7035877;7036088;7037038;7037570	7030926;7031847;7032081;7032330;7033972;7034179;7034379;7034572;7034750;7034960;7035175;7035995;7036237;7037208;7037905	+;+;+;+;+;+;+;+;+;+;+;+;+;+;+	1978	36.95692643	38.60946497	29.49552106	10.54439379	11.92359185	12.22588514	1.83E-07	8.42E-06	1.91643711	U3IVM5,Uncharacterized protein	-	PF00063,Myosin head (motor domain);PF02736,Myosin N-terminal SH3-like domain	IPR004009,Myosin, N-terminal, SH3-like;IPR001609,Myosin head, motor domain;IPR027417,P-loop containing nucleoside triphosphate hydrolase;IPR000048,IQ motif, EF-hand binding site;IPR036961,Kinesin motor domain superfamily;IPR008989,Myosin S1 fragment, N-terminal;IPR027401,Myosin IQ motif-containing domain superfamily	-	GO:0003777,molecular_function,microtubule motor activity;GO:0051015,molecular_function,actin filament binding;GO:0016459,cellular_component,myosin complex;GO:0003779,molecular_function,actin binding;GO:0008017,molecular_function,microtubule binding;GO:0007018,biological_process,microtubule-based movement;GO:0003774,molecular_function,motor activity;GO:0000166,molecular_function,nucleotide binding…	-
POPDC2	NC_040046.1;NC_040046.1;NC_040046.1;NC_040046.1;NC_040046.1;NC_040046.1;NC_040046.1;NC_040046.1	119347377;119347377;119351029;119351167;119353634;119353634;119355525;119355525	119347821;119347821;119351548;119351548;119353742;119353742;119357841;119357827	-;-;-;-;-;-;-;-	3391	15.63212771	18.90722338	19.18678912	8.175060829	8.61809278	8.018464124	1.83E-07	8.42E-06	1.423322576	A0A226PVE7,Uncharacterized protein	-	-	IPR014710,RmlC-like jelly roll fold;IPR006916,Popeye protein;IPR018490,Cyclic nucleotide-binding-like	-	GO:0016021,cellular_component,integral component of membrane;GO:0016020,cellular_component,membrane	-
SOGA1	NC_040066.1;NC_040066.1;NC_040066.1;NC_040066.1;NC_040066.1;NC_040066.1;NC_040066.1;NC_040066.1;NC_040066.1;NC_040066.1;NC_040066.1;NC_040066.1;NC_040066.1;NC_040066.1;NC_040066.1;NC_040066.1;NC_040066.1;NC_040066.1;NC_040066.1;NC_040066.1;NC_040066.1;NC_040066.1;NC_040066.1;NC_040066.1;NC_040066.1;NC_040066.1;NC_040066.1;NC_040066.1;NC_040066.1;NC_040066.1;NC_040066.1;NC_040066.1;NC_040066.1;NC_…	3367155;3367155;3367155;3368149;3368149;3368149;3369834;3369834;3369834;3370289;3370289;3370289;3370515;3370515;3370515;3371482;3371482;3371482;3371812;3371812;3371812;3372036;3372036;3372036;3372578;3372578;3372578;3372868;3372868;3372868;3374245;3374245;3374245;3377297;3377297;3377297;3379495;3379495;3379495;3380591;3380591;3380591;3386357	3368061;3368061;3368061;3369598;3369598;3369598;3369904;3369904;3369904;3370360;3370354;3370360;3370766;3370766;3370766;3371649;3371649;3371649;3371919;3371919;3371919;3372266;3372266;3372266;3372703;3372703;3372703;3372984;3372987;3372987;3375471;3375471;3375471;3377359;3377359;3377359;3379653;3379653;3379653;3380832;3380832;3380815;3386739	-;-;-;-;-;-;-;-;-;-;-;-;-;-;-;-;-;-;-;-;-;-;-;-;-;-;-;-;-;-;-;-;-;-;-;-;-;-;-;-;-;-;-	5579	60.93064008	72.07379918	63.76515578	28.04229151	32.94857154	30.44292233	1.83E-07	8.42E-06	1.417621418	A0A226MSE5,Uncharacterized protein	-	-	IPR027881,Protein SOGA;IPR027882,Domain of unknown function DUF4482	-	GO:0010506,biological_process,regulation of autophagy;GO:0005615,cellular_component,extracellular space	-
LOC106017003	NC_040048.1;NC_040048.1;NC_040048.1	37368903;37372842;37374457	37369589;37372922;37377222	+;+;+	3534	0.064606985	0.06857188	0.0847848	1.373364947	1.394954359	1.872434719	1.85E-07	8.46E-06	-4.079907134	-	-	-	-	-	-	-
CAPNS2	NC_040057.1	20431173	20433981	+	2809	0.108375975	0.160216107	0.1980971	4.265091458	3.674117094	2.855403863	1.89E-07	8.54E-06	-4.223830813	A0A1L1RIZ2,Calpain small subunit 2	XP_004944228.1,calpain small subunit 2	-	IPR002048,EF-hand domain;IPR018247,EF-Hand 1, calcium-binding site;IPR011992,EF-hand domain pair	-	GO:0005509,molecular_function,calcium ion binding	-
IL16	NC_040056.1;NC_040056.1;NC_040056.1;NC_040056.1;NC_040056.1;NC_040056.1;NC_040056.1;NC_040056.1;NC_040056.1;NC_040056.1;NC_040056.1;NC_040056.1;NC_040056.1;NC_040056.1;NC_040056.1;NC_040056.1;NC_040056.1;NC_040056.1;NC_040056.1;NC_040056.1;NC_040056.1;NC_040056.1;NC_040056.1;NC_040056.1;NC_040056.1;NC_040056.1;NC_040056.1;NC_040056.1;NC_040056.1;NC_040056.1;NC_040056.1;NC_040056.1;NC_040056.1;NC_…	9076386;9076386;9076386;9086414;9086414;9086414;9090774;9090774;9090783;9099958;9099958;9099958;9100836;9100836;9100836;9101509;9102985;9102985;9102985;9102985;9103542;9103542;9103542;9103542;9104063;9106088;9106088;9106088;9106088;9106088;9107319;9107319;9107319;9107319;9107319;9107633;9107633;9107633;9107633;9107633;9107797;9107797;9107797;9107797;9107797;9109020;9109020;9109020;9109020;9109020…	9076540;9076540;9076540;9086467;9086467;9086467;9091185;9091185;9091185;9100094;9100094;9100094;9100968;9100968;9100968;9101527;9103081;9103081;9103081;9103081;9103684;9103684;9103684;9103684;9104211;9106198;9106198;9106198;9106198;9106198;9107433;9107433;9107433;9107433;9107433;9107706;9107706;9107706;9107706;9107706;9108010;9108010;9108010;9108010;9108010;9109137;9109137;9109137;9109137;9109137…	+;+;+;+;+;+;+;+;+;+;+;+;+;+;+;+;+;+;+;+;+;+;+;+;+;+;+;+;+;+;+;+;+;+;+;+;+;+;+;+;+;+;+;+;+;+;+;+;+;+;+;+;+;+;+;+;+;+;+;+;+;+;+;+;+;+;+;+;+;+;+;+;+;+;+;+;+;+;+;+;+;+;+;+;+;+;+;+;+;+;+;+;+;+;+;+;+;+;+;+	5012	0.296106753	0.179587807	0.307452439	3.358761697	4.627841	4.704955824	1.90E-07	8.54E-06	-3.701607466	F1P243,Pro-interleukin-16	-	PF00595,PDZ domain (Also known as DHR or GLGF)	IPR020450,Interleukin-16;IPR036034,PDZ superfamily;IPR001478,PDZ domain	KOG3528,FOG: PDZ domain;ENOG4110362,-	GO:0050930,biological_process,induction of positive chemotaxis;GO:0051924,biological_process,regulation of calcium ion transport;GO:0006935,biological_process,chemotaxis;GO:0005125,molecular_function,cytokine activity;GO:0005737,cellular_component,cytoplasm;GO:0010469,biological_process,regulation of signaling receptor activity;GO:0030595,biological_process,leukocyte chemotaxis;GO:0005886,cellula…	-
IMPA2	NC_040047.1;NC_040047.1;NC_040047.1;NC_040047.1;NC_040047.1;NC_040047.1;NC_040047.1;NC_040047.1	108127991;108132515;108137323;108138806;108141206;108144747;108145010;108146025	108128159;108132648;108137427;108138851;108141314;108144855;108145161;108148012	+;+;+;+;+;+;+;+	2812	33.96668573	40.91001018	36.09131797	19.25018259	18.17441363	18.79703631	1.89E-07	8.54E-06	1.292008667	F1P0Q6,Inositol-1-monophosphatase	-	PF00459,Inositol monophosphatase family	IPR033942,Inositol monophosphatase;IPR020550,Inositol monophosphatase, conserved site;IPR000760,Inositol monophosphatase-like;IPR020552,Inositol monophosphatase, Lithium-sensitive;IPR020583,Inositol monophosphatase, metal-binding site	KOG2951,Inositol monophosphatase;COG0483,Archaeal fructose-1,6-bisphosphatase and related enzymes of inositol monophosphatase family	GO:0016787,molecular_function,hydrolase activity;GO:0006020,biological_process,inositol metabolic process;GO:0052834,molecular_function,inositol monophosphate phosphatase activity;GO:0005737,cellular_component,cytoplasm;GO:0042803,molecular_function,protein homodimerization activity;GO:0046872,molecular_function,metal ion binding;GO:0052833,molecular_function,inositol monophosphate 4-phosphatase …	-
ITGB1BP2	NC_040055.1;NC_040055.1;NC_040055.1;NC_040055.1;NC_040055.1;NC_040055.1;NC_040055.1;NC_040055.1;NC_040055.1;NC_040055.1;NC_040055.1	11544770;11546397;11546857;11548041;11548251;11548729;11548906;11549180;11549651;11549793;11549976	11545170;11546459;11546976;11548143;11548321;11548787;11549018;11549325;11549707;11549842;11550182	-;-;-;-;-;-;-;-;-;-;-	1390	55.73881626	46.52395578	56.8156624	13.30623202	11.20112035	16.41673366	1.88E-07	8.54E-06	2.282222968	U3I546,Integrin subunit beta 1 binding protein 2	-	PF04968,CHORD;PF04969,CS domain	IPR007051,CHORD domain;IPR007052,CS domain;IPR008978,HSP20-like chaperone	-	GO:0030018,cellular_component,Z disc;GO:0008270,molecular_function,zinc ion binding;GO:0005509,molecular_function,calcium ion binding	-
[truncated: 2,550 more rows]
