# Supplementary material for: Profiling Analysis of N6-Methyladenosine mRNA Methylation Reveals Differential m6A Patterns during the Embryonic Skeletal Muscle Development of Ducks
Source: Animals (Basel). 2022 Sep 28;12(19):2593. doi: 10.3390/ani12192593 (PMC9559603; doi:10.3390/ani12192593)
Supplement: Supplementary file 1 [file animals-12-02593-s001.zip › Table S14.xls]

Category	Term	Count	%	PValue	Genes	List Total	Pop Hits	Pop Total	Fold Enrichment	Bonferroni	Benjamini	FDR
GOTERM_BP_DIRECT	GO:0009952~anterior/posterior pattern specification	24	0.008004189	1.20E-07	BTG2, EMX2, MSX2, ZBTB16, MLLT3, HOXC11, HOXD10, GLI3, HOXC10, GLI2, HOXA11, SHH, HOXB9, ZIC3, HOXC5, HOXA2, ALX4, HOXC4, ALX1, HOXD4, HOXC9, HOXA7, HOXC8, HOXB5	1066	53	7753	3.293426316	3.58E-04	3.58E-04	3.57E-04
GOTERM_BP_DIRECT	GO:0030326~embryonic limb morphogenesis	15	0.005002618	7.97E-07	FBN2, PRRX1, DLX5, PTCH1, LEF1, HNF1A, BMP7, GDF5, HOXD10, HOXC10, GREM1, SHH, GJA5, ALX1, TP63	1066	25	7753	4.363789869	0.002381475	0.001192157	0.001186575
GOTERM_BP_DIRECT	GO:0090090~negative regulation of canonical Wnt signaling pathway	26	0.008671205	1.52E-06	DRAXIN, LEF1, PTPRO, PRICKLE1, MLLT3, FOXO3, GLI3, SHH, WNT11, SOSTDC1, SOST, CTHRC1, WWTR1, WNT5B, CAV1, WNT5A, NOG, AXIN2, DKK2, DKK3, GREM1, DAB2, BMP2, SFRP2, RAPGEF1, ROR2	1066	68	7753	2.780846485	0.004548947	0.001519774	0.001512658
GOTERM_BP_DIRECT	GO:0030198~extracellular matrix organization	23	0.007670681	2.52E-06	CSGALNACT1, VIT, WNT3A, ELN, FBLN1, NDNF, TNFRSF11B, DMP1, OLFML2A, MMP9, COL19A1, SERPINB5, ADAMTS20, SMOC2, ELF3, CRISPLD2, ADAMTSL2, ITGA8, COL4A6, TNR, TGFBI, MPZL3, NOX1	1066	57	7753	2.934712485	0.007511399	0.001884936	0.00187611
GOTERM_BP_DIRECT	GO:0042733~embryonic digit morphogenesis	18	0.006003142	1.14E-05	FBXW4, NOG, WNT5A, WNT7A, HOXC11, GRHL2, GLI3, GLI2, HOXA11, BMP4, GJA1, SHH, SFRP2, SALL1, CHST11, FLVCR1, ALX4, ROR2	1066	41	7753	3.193016977	0.033468108	0.006629159	0.00659812
GOTERM_BP_DIRECT	GO:0007169~transmembrane receptor protein tyrosine kinase signaling pathway	13	0.004335602	1.33E-05	ALK, RET, NTRK2, LTK, GFRA2, DOK4, ERBB4, DOK5, LOC101797327, NTF3, ROR1, ROR2, ANGPTL1	1066	23	7753	4.110816543	0.038994572	0.006629159	0.00659812
GOTERM_BP_DIRECT	GO:0007411~axon guidance	20	0.006670157	3.03E-05	EPHA5, ROBO2, DRAXIN, SEMA3C, DLX5, WNT3A, PTPRO, CRMP1, ETV1, GATA3, BMP7, GLI3, GDF7, GLI2, ROBO1, CDH4, FLRT2, BOC, CNTN4, WNT3	1066	52	7753	2.797301198	0.086612838	0.012183707	0.01212666
GOTERM_BP_DIRECT	GO:0060021~palate development	19	0.00633665	3.26E-05	GABRB3, CSRNP1, PKDCC, PRRX1, DLX5, WNT3A, INSIG1, SATB2, CHD7, LEF1, WNT5A, WNT9B, WNT7A, INHBA, GLI3, SHH, WNT11, ALX4, ALX1	1066	48	7753	2.878889149	0.092871576	0.012183707	0.01212666
GOTERM_BP_DIRECT	GO:0007155~cell adhesion	21	0.007003665	6.55E-05	TNFAIP6, DSCAM, LAMA1, TNC, GRHL2, THBS1, HAPLN1, FERMT1, ACAN, VCAN, GPNMB, CNTN1, CD9, IGFBP7, CNTN3, NCAM2, TGFBI, CTNNA2, SUSD5, CNTN4, ITGA9	1066	59	7753	2.588688905	0.177859595	0.021759742	0.021657857
GOTERM_BP_DIRECT	GO:0007517~muscle organ development	9	0.003001571	8.37E-05	MYOG, FXR1, MYOD1, MYF6, PAX3, ALX4, ETV1, JPH1, CRYAB	1066	13	7753	5.035142156	0.221493007	0.023535076	0.023424878
GOTERM_BP_DIRECT	GO:0048704~embryonic skeletal system morphogenesis	12	0.004002094	8.66E-05	EYA1, COL11A1, SATB2, FLVCR1, ALX4, ALX1, HOXD4, HOXC9, HOXA7, HOXD10, GLI3, HOXB5	1066	23	7753	3.794599886	0.228097506	0.023535076	0.023424878
GOTERM_BP_DIRECT	GO:0002062~chondrocyte differentiation	11	0.003668587	3.08E-04	BMP4, BMP2, WNT2B, WNT5B, WNT7A, SCX, CYTL1, PTH1R, GDF5, MEF2D, GLI2	1066	22	7753	3.636491557	0.602336384	0.076833886	0.076474129
GOTERM_BP_DIRECT	GO:0090263~positive regulation of canonical Wnt signaling pathway	16	0.005336126	4.93E-04	WNT2B, DLX5, CAV1, WNT7A, DKK2, SFRP1, GPRC5B, SFRP2, BAMBI, CAPRIN2, RSPO2, RSPO1, ROR2, LGR5, LGR4, WLS	1066	44	7753	2.644721133	0.771145793	0.113408195	0.112877187
GOTERM_BP_DIRECT	GO:0061436~establishment of skin barrier	6	0.002001047	8.00E-04	KDF1, TMEM79, SFN, ABCA12, CLDN1, TP63	1066	7	7753	6.233985527	0.908673187	0.149298779	0.148599722
GOTERM_BP_DIRECT	GO:0002076~osteoblast development	7	0.002334555	8.49E-04	SHH, MSX2, SATB2, HOXA2, PTH1R, RUNX2, GLI2	1066	10	7753	5.09108818	0.920983696	0.149298779	0.148599722
GOTERM_BP_DIRECT	GO:0071392~cellular response to estradiol stimulus	7	0.002334555	8.49E-04	MYOG, CRHBP, SFRP1, MSX2, MYOD1, ESR1, EGFR	1066	10	7753	5.09108818	0.920983696	0.149298779	0.148599722
GOTERM_BP_DIRECT	GO:0008584~male gonad development	13	0.004335602	9.30E-04	WNT2B, SRD5A2, WNT5A, INHBA, GATA3, YBX3, ESR1, RXFP2, HOXA11, SFRP1, SFRP2, COL9A3, LHX9	1066	33	7753	2.86511456	0.938119327	0.149298779	0.148599722
GOTERM_BP_DIRECT	GO:0035116~embryonic hindlimb morphogenesis	9	0.003001571	9.49E-04	BMP4, SHH, MSX2, ZBTB16, CHD7, RSPO2, WNT7A, ALX4, WNT3	1066	17	7753	3.850402825	0.941458728	0.149298779	0.148599722
GOTERM_BP_DIRECT	GO:0035115~embryonic forelimb morphogenesis	9	0.003001571	9.49E-04	SHH, MSX2, RSPO2, WNT7A, ALX4, TBX5, RUNX2, WNT3, HOXA11	1066	17	7753	3.850402825	0.941458728	0.149298779	0.148599722
GOTERM_BP_DIRECT	GO:0086091~regulation of heart rate by cardiac conduction	9	0.003001571	0.001503841	DSP, CAV1, CACNA2D1, GJA5, PKP2, ANK2, CACNA1D, SCN4B, SCN2B	1066	18	7753	3.636491557	0.988889556	0.224824267	0.223771578
GOTERM_BP_DIRECT	GO:0001649~osteoblast differentiation	17	0.005669634	0.001807176	WWTR1, CBFB, DLX5, WNT3A, NOG, LEF1, TNC, FHL2, BMP4, GJA1, VCAN, SFRP1, BMP2, WNT11, RSPO2, MEF2D, LGR4	1066	54	7753	2.289642832	0.995520948	0.257307406	0.256102622
GOTERM_BP_DIRECT	GO:0043066~negative regulation of apoptotic process	32	0.010672252	0.002047924	PTGFR, LTK, FHL2, HTR2B, SCX, EGFR, GLI3, GLI2, SOCS3, NUAK2, WNT11, CHST11, ERBB4, MYO18A, PTK2B, CAPN3, NTSR1, TP63, PLK3, UBE2B, MSX2, BCL11B, WNT5A, WNT7A, HIPK3, ADAMTS20, BTC, GREM1, GH1, DAB2, ACTC1, BCL6	1066	134	7753	1.736831789	0.997822485	0.264901251	0.263660911
GOTERM_BP_DIRECT	GO:0030282~bone mineralization	8	0.002668063	0.002126298	PKDCC, WNT11, RSPO2, PTH1R, PTN, AXIN2, LGR4, PHEX	1066	15	7753	3.878924328	0.998278224	0.264901251	0.263660911
GOTERM_BP_DIRECT	GO:0048565~digestive tract development	8	0.002668063	0.002126298	COL3A1, CLMP, ITGB4, COBL, ALX4, ITGA6, FAT4, LGR4	1066	15	7753	3.878924328	0.998278224	0.264901251	0.263660911
GOTERM_BP_DIRECT	GO:0030335~positive regulation of cell migration	20	0.006670157	0.002636939	RET, CEMIP, FLT1, WNT5B, LEF1, EGFR, AQP1, FAM83H, PAK1, DAB2, BMP2, WNT11, FAM110C, NTF3, NUMB, CDH13, ROR2, EPHA1, LGR6, HRAS	1066	71	7753	2.048727638	0.999627346	0.315377874	0.313901189
GOTERM_BP_DIRECT	GO:0042472~inner ear morphogenesis	11	0.003668587	0.002873878	ATP8A2, USH1G, PRRX1, WNT3A, DLX5, COL11A1, INSIG1, ITGA8, KCNQ4, ROR2, GATA3	1066	28	7753	2.857243366	0.999816861	0.323301238	0.321787453
GOTERM_BP_DIRECT	GO:0032332~positive regulation of chondrocyte differentiation	7	0.002334555	0.002919443	PKDCC, ZBTB16, GDF5, GLI3, RUNX2, HOXA11, SOX5	1066	12	7753	4.242573483	0.99984025	0.323301238	0.321787453
GOTERM_BP_DIRECT	GO:0009954~proximal/distal pattern formation	8	0.002668063	0.00333636	GREM1, HOXC11, HOXD10, GLI3, TP63, HOXC10, GLI2, HOXA11	1066	16	7753	3.636491557	0.999954254	0.356275628	0.354607448
GOTERM_BP_DIRECT	GO:0043616~keratinocyte proliferation	6	0.002001047	0.00377731	FERMT1, PTCH1, CDH13, IRF6, WNT16, TP63	1066	9	7753	4.84865541	0.999987818	0.364327601	0.362621719
GOTERM_BP_DIRECT	GO:0035413~positive regulation of catenin import into nucleus	6	0.002001047	0.00377731	KANK1, SFRP2, WNT3A, BAMBI, EGF, EGFR	1066	9	7753	4.84865541	0.999987818	0.364327601	0.362621719
GOTERM_BP_DIRECT	GO:0060307~regulation of ventricular cardiac muscle cell membrane repolarization	6	0.002001047	0.00377731	GJA1, CAV3, CACNA2D1, GJA5, ANK2, SCN4B	1066	9	7753	4.84865541	0.999987818	0.364327601	0.362621719
GOTERM_BP_DIRECT	GO:0060272~embryonic skeletal joint morphogenesis	5	0.001667539	0.004216941	BMP4, NOG, HOXC11, BMP7, HOXA11	1066	6	7753	6.060819262	0.999996745	0.382080381	0.380291376
GOTERM_BP_DIRECT	GO:0045606~positive regulation of epidermal cell differentiation	5	0.001667539	0.004216941	BMP4, PTCH1, PTCH2, KDF1, SFN	1066	6	7753	6.060819262	0.999996745	0.382080381	0.380291376
GOTERM_BP_DIRECT	GO:0033138~positive regulation of peptidyl-serine phosphorylation	13	0.004335602	0.004671491	OPRD1, NTRK2, TENM1, WNT3A, CAV1, WNT5A, MIF, PAK1, PINK1, SFRP2, CAPRIN2, NTF3, STOX1	1066	39	7753	2.424327705	0.999999169	0.389842668	0.388017317
GOTERM_BP_DIRECT	GO:0050679~positive regulation of epithelial cell proliferation	9	0.003001571	0.004783934	SFRP1, EYA1, ESRP2, DLX5, NOG, FGF1, HRAS, EGFR, BMP5	1066	21	7753	3.116992763	0.999999407	0.389842668	0.388017317
GOTERM_BP_DIRECT	GO:0002063~chondrocyte development	7	0.002334555	0.00479733	ACAN, SFRP2, CHST11, MSX2, COL11A1, SULF1, RUNX2	1066	13	7753	3.916221677	0.999999431	0.389842668	0.388017317
GOTERM_BP_DIRECT	GO:0040007~growth	8	0.002668063	0.005007708	BMP4, BMP2, INHBB, INHBA, BMP7, GDF5, BMP5, GDF7	1066	17	7753	3.422580289	0.999999697	0.389842668	0.388017317
GOTERM_BP_DIRECT	GO:0007154~cell communication	8	0.002668063	0.005007708	SLC8A3, LOC101797522, GJD4, LOC101797703, GJA3, GJB3, GJA4, GJA8	1066	17	7753	3.422580289	0.999999697	0.389842668	0.388017317
GOTERM_BP_DIRECT	GO:0030514~negative regulation of BMP signaling pathway	11	0.003668587	0.005084904	GREM1, SFRP1, SHH, SFRP2, NOG, WNT5A, VWC2, SOSTDC1, SOST, CHRDL1, FSTL3	1066	30	7753	2.666760475	0.99999976	0.389842668	0.388017317
GOTERM_BP_DIRECT	GO:0009880~embryonic pattern specification	6	0.002001047	0.006706116	SHH, ERBB4, SATB2, ZBTB16, BMP7, SIM2	1066	10	7753	4.363789869	0.999999998	0.501282178	0.498935038
GOTERM_BP_DIRECT	GO:0010862~positive regulation of pathway-restricted SMAD protein phosphorylation	8	0.002668063	0.007237441	BMP4, GDF10, DAB2, BMP2, INHBA, BMP7, BMP5, GDF7	1066	18	7753	3.23243694	1	0.516739951	0.514320433
GOTERM_BP_DIRECT	GO:0060048~cardiac muscle contraction	7	0.002334555	0.007431377	CSRP3, TNNC1, MYL3, TPM1, CASQ2, NKX2-5, ATP1B1	1066	14	7753	3.636491557	1	0.516739951	0.514320433
GOTERM_BP_DIRECT	GO:0030177~positive regulation of Wnt signaling pathway	7	0.002334555	0.007431377	KANK1, SHH, SALL1, LGR6, SULF1, WNT3, ATP6V1C2	1066	14	7753	3.636491557	1	0.516739951	0.514320433
GOTERM_BP_DIRECT	GO:0001501~skeletal system development	10	0.003335079	0.007747654	PKDCC, VDR, GJA5, CHD7, MMP9, PTHLH, FGFRL1, TP63, HOXC10, BMP5	1066	27	7753	2.69369745	1	0.526488322	0.524023159
GOTERM_BP_DIRECT	GO:0010976~positive regulation of neuron projection development	11	0.003668587	0.0084455	NCKIPSD, RET, NTRK2, LTK, GPRC5B, ATP8A2, WNT5A, RAPGEF1, CNTN1, PTK2B, NDNF	1066	32	7753	2.500087946	1	0.55494015	0.552341768
GOTERM_BP_DIRECT	GO:0060070~canonical Wnt signaling pathway	12	0.004002094	0.008814693	PTPRU, SFRP1, SHH, WNT2B, WNT11, HOXB9, UBE2B, WNT5A, LEF1, WNT9B, WNT7A, NDP	1066	37	7753	2.358805334	1	0.55494015	0.552341768
GOTERM_BP_DIRECT	GO:0007158~neuron cell-cell adhesion	4	0.001334031	0.009279936	RET, NLGN1, TNR, ASTN1	1066	4	7753	7.272983114	1	0.55494015	0.552341768
GOTERM_BP_DIRECT	GO:0010739~positive regulation of protein kinase A signaling	4	0.001334031	0.009279936	MC1R, ADIPOQ, MIF, AKAP5	1066	4	7753	7.272983114	1	0.55494015	0.552341768
GOTERM_BP_DIRECT	GO:0060686~negative regulation of prostatic bud formation	4	0.001334031	0.009279936	BMP4, WNT5A, SULF1, BMP7	1066	4	7753	7.272983114	1	0.55494015	0.552341768
GOTERM_BP_DIRECT	GO:0007442~hindgut morphogenesis	4	0.001334031	0.009279936	SHH, WNT5A, GLI3, GLI2	1066	4	7753	7.272983114	1	0.55494015	0.552341768
GOTERM_BP_DIRECT	GO:0045669~positive regulation of osteoblast differentiation	12	0.004002094	0.01090448	FBN2, BMP4, GJA1, SHH, BMP2, SFRP2, MSX2, BMP7, GLI3, TP63, RUNX2, CTHRC1	1066	38	7753	2.29673151	1	0.627854852	0.624915063
GOTERM_BP_DIRECT	GO:0001656~metanephros development	6	0.002001047	0.010919215	EYA1, ID2, ITGA8, HOXC11, GLI3, HOXA11	1066	11	7753	3.967081699	1	0.627854852	0.624915063
GOTERM_BP_DIRECT	GO:0045599~negative regulation of fat cell differentiation	9	0.003001571	0.011859126	WWTR1, MSX2, WNT3A, INSIG1, ADIPOQ, WNT5A, ENPP1, GATA3, TRIB2	1066	24	7753	2.727368668	1	0.656644208	0.65356962
GOTERM_BP_DIRECT	GO:0043588~skin development	9	0.003001571	0.011859126	TFAP2B, COL3A1, SHH, ATP8A2, ITGB4, PTCH2, DACT2, ITGA6, DHCR24	1066	24	7753	2.727368668	1	0.656644208	0.65356962
GOTERM_BP_DIRECT	GO:0008283~cell proliferation	23	0.007670681	0.012276813	USP13, PDXK, LTK, ENPEP, DLX5, TXNRD1, RASGRF1, MIF, AXIN2, USP28, TYR, GRHL2, EGFR, GLI2, BMP4, UCHL1, IRF2, COL4A3, TGFBI, HRAS, GLUL, FAM83B, LHX9	1066	98	7753	1.706924608	1	0.667412179	0.664287172
GOTERM_BP_DIRECT	GO:0001658~branching involved in ureteric bud morphogenesis	10	0.003335079	0.012846545	BMP4, GREM1, SHH, BMP2, EYA1, PTCH1, WNT9B, FAT4, GLI3, HOXA11	1066	29	7753	2.507925212	1	0.685913763	0.682702127
GOTERM_BP_DIRECT	GO:0001657~ureteric bud development	8	0.002668063	0.013766963	ROBO2, RET, ARG2, SFRP1, EPCAM, SIM1, BMP7, CRLF1	1066	20	7753	2.909193246	1	0.697681709	0.694414972
GOTERM_BP_DIRECT	GO:0043406~positive regulation of MAP kinase activity	8	0.002668063	0.013766963	TENM1, FLT1, HTR2B, NOX4, MIF, TPD52L1, HRAS, EGFR	1066	20	7753	2.909193246	1	0.697681709	0.694414972
GOTERM_BP_DIRECT	GO:0071560~cellular response to transforming growth factor beta stimulus	8	0.002668063	0.013766963	WNT10A, SFRP1, COL4A2, CAV1, WNT5A, WNT7A, SCX, SOX5	1066	20	7753	2.909193246	1	0.697681709	0.694414972
GOTERM_BP_DIRECT	GO:0045214~sarcomere organization	7	0.002334555	0.015547139	ACTN2, TPM1, CASQ2, CAPN3, LDB3, KLHL41, MYPN	1066	16	7753	3.181930113	1	0.742908381	0.73942988
GOTERM_BP_DIRECT	GO:0048741~skeletal muscle fiber development	7	0.002334555	0.015547139	MYOG, CAV2, MYOD1, DNER, STAC3, KLHL40, KLHL41	1066	16	7753	3.181930113	1	0.742908381	0.73942988
GOTERM_BP_DIRECT	GO:0006936~muscle contraction	7	0.002334555	0.015547139	TMOD1, MYOM1, MYBPC1, MYL1, ACTN2, CACNA1S, MYOM2	1066	16	7753	3.181930113	1	0.742908381	0.73942988
GOTERM_BP_DIRECT	GO:0048557~embryonic digestive tract morphogenesis	5	0.001667539	0.015653254	SHH, ID2, TCF7, GLI3, OVOL2	1066	8	7753	4.545614447	1	0.742908381	0.73942988
GOTERM_BP_DIRECT	GO:0030509~BMP signaling pathway	10	0.003335079	0.016172963	TMEM100, FAM83G, DLX5, NOG, LEF1, SCX, ROR2, BMP7, RUNX2, GDF7	1066	30	7753	2.424327705	1	0.753540607	0.750012323
GOTERM_BP_DIRECT	GO:0055010~ventricular cardiac muscle tissue morphogenesis	6	0.002001047	0.016633338	TNNC1, COL11A1, MYL3, TPM1, PKP2, TNNI1	1066	12	7753	3.636491557	1	0.753540607	0.750012323
GOTERM_BP_DIRECT	GO:0030539~male genitalia development	6	0.002001047	0.016633338	SHH, SRD5A2, WNT9B, DHCR24, LGR4, BMP5	1066	12	7753	3.636491557	1	0.753540607	0.750012323
GOTERM_BP_DIRECT	GO:0007156~homophilic cell adhesion via plasma membrane adhesion molecules	15	0.005002618	0.016896601	RET, ROBO2, PCDH10, PCDH7, CDH8, CDH4, LOC101803492, DCHS2, CDHR1, CDH11, FAT1, CDH13, FAT2, FAT4, LOC101801046	1066	56	7753	1.948120477	1	0.754042334	0.750511701
GOTERM_BP_DIRECT	GO:0051965~positive regulation of synapse assembly	11	0.003668587	0.019968002	NTRK2, NLGN1, FLRT2, LRRN3, SLITRK1, ADGRB3, SLITRK4, LRRTM2, SLITRK6, SYNDIG1, EFNA5	1066	36	7753	2.222300396	1	0.853315914	0.849320454
GOTERM_BP_DIRECT	GO:0006338~chromatin remodeling	10	0.003335079	0.020088756	KAT2B, SMARCD3, SATB1, SATB2, MYB, CHD7, SMYD1, HNF1A, GATA3, TP63	1066	31	7753	2.346123585	1	0.853315914	0.849320454
GOTERM_BP_DIRECT	GO:0072001~renal system development	4	0.001334031	0.020833465	EMX2, ITGB4, ITGA6, TBX18	1066	5	7753	5.818386492	1	0.853315914	0.849320454
GOTERM_BP_DIRECT	GO:0060687~regulation of branching involved in prostate gland morphogenesis	4	0.001334031	0.020833465	BMP4, SFRP1, BMP7, ESR1	1066	5	7753	5.818386492	1	0.853315914	0.849320454
GOTERM_BP_DIRECT	GO:0045617~negative regulation of keratinocyte differentiation	4	0.001334031	0.020833465	MSX2, HOXA7, GRHL2, TP63	1066	5	7753	5.818386492	1	0.853315914	0.849320454
GOTERM_BP_DIRECT	GO:0048341~paraxial mesoderm formation	4	0.001334031	0.020833465	WNT11, WNT5A, LEF1, HNF1A	1066	5	7753	5.818386492	1	0.853315914	0.849320454
GOTERM_BP_DIRECT	GO:0001937~negative regulation of endothelial cell proliferation	7	0.002334555	0.021295919	AIMP1, CAV2, CAV1, TNMD, SULF1, XDH, THBS1	1066	17	7753	2.994757753	1	0.860470259	0.856441302
GOTERM_BP_DIRECT	GO:0001958~endochondral ossification	6	0.002001047	0.024030842	BMP4, CSGALNACT1, DLX5, SCX, MEF2D, RUNX2	1066	13	7753	3.356761437	1	0.9569869	0.952506024
GOTERM_BP_DIRECT	GO:0045600~positive regulation of fat cell differentiation	9	0.003001571	0.024622282	SFRP1, BMP2, SFRP2, KLF5, WNT5B, WIF1, ID2, LMO3, ZBTB16	1066	27	7753	2.424327705	1	0.9569869	0.952506024
GOTERM_BP_DIRECT	GO:0007409~axonogenesis	10	0.003335079	0.024644813	NTNG1, RTN4R, ATP8A2, PTPRZ1, SLITRK1, SLITRK4, NUMB, SLITRK6, CCK, ADCY1	1066	32	7753	2.272807223	1	0.9569869	0.952506024
GOTERM_BP_DIRECT	GO:0042474~middle ear morphogenesis	5	0.001667539	0.025154009	EYA1, PRRX1, INSIG1, NOG, HOXA2	1066	9	7753	4.040546175	1	0.964236999	0.959722176
GOTERM_BP_DIRECT	GO:0060325~face morphogenesis	7	0.002334555	0.028325159	CSRNP1, CRISPLD1, CRISPLD2, DLX5, NOG, LEF1, SCX	1066	18	7753	2.828382322	1	1	0.995650719
GOTERM_BP_DIRECT	GO:0010629~negative regulation of gene expression	14	0.00466911	0.032401732	OPRD1, ACE, SFMBT2, MIF, GH1, PINK1, GJA1, STC2, ITGB8, SLIT3, HRAS, XDH, CRYAB, STOX1	1066	55	7753	1.851304793	1	1	0.995650719
GOTERM_BP_DIRECT	GO:0051216~cartilage development	7	0.002334555	0.036725433	FBXW4, CSGALNACT1, PRRX1, SATB2, ZBTB16, ITGB8, HOXC4	1066	19	7753	2.679520095	1	1	0.995650719
GOTERM_BP_DIRECT	GO:0019233~sensory perception of pain	7	0.002334555	0.036725433	P2RX7, GRIN2A, MC1R, MME, PENK, OPRL1, AQP1	1066	19	7753	2.679520095	1	1	0.995650719
GOTERM_BP_DIRECT	GO:0008285~negative regulation of cell proliferation	29	0.009671728	0.036752502	PTPRU, DPT, PTH1R, GLI3, FGFRL1, SCIN, ERBB4, PTK2B, SLIT3, HRAS, MYOG, TFAP2B, CDKN2C, MSX2, BCL11B, ZBTB16, TSC1, INHBA, AXIN2, BMP5, KAT2B, BMP2, BCL6, WNK2, CDH13, CD9, NOX4, ROR2, IRF6	1066	145	7753	1.454596623	1	1	0.995650719
GOTERM_BP_DIRECT	GO:0006355~regulation of transcription, DNA-templated	28	0.00933822	0.037210092	USP13, MLLT3, HOXC10, KLHL31, SOX2, DMD, HOXC9, TCFL5, IRX1, MYOG, EMX2, SFMBT2, PRRX2, EYA4, SOX13, ATP1B4, LOC101793031, RUNX2, LIN28B, WT1, MYOD1, MYF6, AHRR, MKX, VGLL1, ABCG1, LHX9, LHX8	1066	139	7753	1.465061347	1	1	0.995650719
GOTERM_BP_DIRECT	GO:0035136~forelimb morphogenesis	4	0.001334031	0.03744999	TFAP2B, ZBTB16, GDF5, HOXD10	1066	6	7753	4.84865541	1	1	0.995650719
GOTERM_BP_DIRECT	GO:0008585~female gonad development	4	0.001334031	0.03744999	SFRP1, COL9A3, LHX9, LHX8	1066	6	7753	4.84865541	1	1	0.995650719
GOTERM_BP_DIRECT	GO:0043508~negative regulation of JUN kinase activity	4	0.001334031	0.03744999	SFRP1, SFRP2, DUSP10, HIPK3	1066	6	7753	4.84865541	1	1	0.995650719
GOTERM_BP_DIRECT	GO:0003009~skeletal muscle contraction	4	0.001334031	0.03744999	TNNC2, TNNT3, STAC3, TNNI2	1066	6	7753	4.84865541	1	1	0.995650719
GOTERM_BP_DIRECT	GO:0021954~central nervous system neuron development	4	0.001334031	0.03744999	NTRK2, BTG2, NPY, HPRT1	1066	6	7753	4.84865541	1	1	0.995650719
GOTERM_BP_DIRECT	GO:0008045~motor neuron axon guidance	5	0.001667539	0.037452604	ALCAM, NOG, SLIT1, HOXA2, ETV4	1066	10	7753	3.636491557	1	1	0.995650719
GOTERM_BP_DIRECT	GO:0006695~cholesterol biosynthetic process	5	0.001667539	0.037452604	INSIG1, DHCR24, DHCR7, HMGCR, HSD17B7	1066	10	7753	3.636491557	1	1	0.995650719
GOTERM_BP_DIRECT	GO:0018149~peptide cross-linking	5	0.001667539	0.037452604	DSP, COL3A1, THBS1, EVPL, TGM2	1066	10	7753	3.636491557	1	1	0.995650719
GOTERM_BP_DIRECT	GO:0016051~carbohydrate biosynthetic process	5	0.001667539	0.037452604	CHST8, CHST9, LOC101790054, CHST11, CHST14	1066	10	7753	3.636491557	1	1	0.995650719
GOTERM_BP_DIRECT	GO:0008016~regulation of heart contraction	5	0.001667539	0.037452604	GLP1R, CHRM2, THRB, HOPX, HBEGF	1066	10	7753	3.636491557	1	1	0.995650719
GOTERM_BP_DIRECT	GO:0045668~negative regulation of osteoblast differentiation	8	0.002668063	0.037650356	GDF10, SFRP1, ID2, PTCH1, NOG, HOXA2, AXIN2, OSTN	1066	24	7753	2.424327705	1	1	0.995650719
GOTERM_BP_DIRECT	GO:0007605~sensory perception of sound	14	0.00466911	0.042239946	GABRB3, TUB, GABRB2, CEMIP, ADGRV1, THRB, CHD7, EYA4, SLC1A3, CACNA1D, TSPEAR, USH1G, KCNQ4, CRYM	1066	57	7753	1.78634673	1	1	0.995650719
GOTERM_BP_DIRECT	GO:0032331~negative regulation of chondrocyte differentiation	6	0.002001047	0.044395103	BMP4, GREM1, CHADL, GDF5, PTHLH, GLI2	1066	15	7753	2.909193246	1	1	0.995650719
GOTERM_BP_DIRECT	GO:0002088~lens development in camera-type eye	6	0.002001047	0.044395103	GJA1, NHS, SLITRK6, GATA3, GJA8, CRYAB	1066	15	7753	2.909193246	1	1	0.995650719
GOTERM_BP_DIRECT	GO:0030199~collagen fibril organization	8	0.002668063	0.046307312	GREM1, ACAN, COL3A1, SFRP2, COL11A1, SERPINF2, DPT, SCX	1066	25	7753	2.327354597	1	1	0.995650719
GOTERM_BP_DIRECT	GO:0010595~positive regulation of endothelial cell migration	7	0.002334555	0.046564778	BMP4, WNT5A, WNT7A, PTK2B, TEK, GATA3, FGF1	1066	20	7753	2.54554409	1	1	0.995650719
GOTERM_BP_DIRECT	GO:0030336~negative regulation of cell migration	10	0.003335079	0.050155322	PTPRU, KANK1, SFRP1, SHH, SFRP2, WNT11, NOG, EPHA1, SULF1, TBX5	1066	36	7753	2.020273087	1	1	0.995650719
GOTERM_BP_DIRECT	GO:0048570~notochord morphogenesis	3	0.001000524	0.051391085	WNT11, NOG, WNT5A	1066	3	7753	7.272983114	1	1	0.995650719
GOTERM_BP_DIRECT	GO:0060513~prostatic bud formation	3	0.001000524	0.051391085	NOG, TP63, GLI2	1066	3	7753	7.272983114	1	1	0.995650719
GOTERM_BP_DIRECT	GO:0071285~cellular response to lithium ion	3	0.001000524	0.051391085	MYOG, SHH, ID2	1066	3	7753	7.272983114	1	1	0.995650719
GOTERM_BP_DIRECT	GO:0051647~nucleus localization	3	0.001000524	0.051391085	CAV3, BIN1, DMD	1066	3	7753	7.272983114	1	1	0.995650719
GOTERM_BP_DIRECT	GO:0060197~cloacal septation	3	0.001000524	0.051391085	BMP4, WNT11, TP63	1066	3	7753	7.272983114	1	1	0.995650719
GOTERM_BP_DIRECT	GO:0051781~positive regulation of cell division	3	0.001000524	0.051391085	SHH, HTR2B, FGF1	1066	3	7753	7.272983114	1	1	0.995650719
GOTERM_BP_DIRECT	GO:0060993~kidney morphogenesis	3	0.001000524	0.051391085	WWTR1, GCNT1, PRKX	1066	3	7753	7.272983114	1	1	0.995650719
GOTERM_BP_DIRECT	GO:0070779~D-aspartate import	3	0.001000524	0.051391085	SLC1A1, SLC1A2, SLC1A3	1066	3	7753	7.272983114	1	1	0.995650719
GOTERM_BP_DIRECT	GO:0048935~peripheral nervous system neuron development	3	0.001000524	0.051391085	NTRK2, ETV1, HOXD10	1066	3	7753	7.272983114	1	1	0.995650719
GOTERM_BP_DIRECT	GO:0051938~L-glutamate import	3	0.001000524	0.051391085	SLC1A1, SLC1A2, SLC1A3	1066	3	7753	7.272983114	1	1	0.995650719
GOTERM_BP_DIRECT	GO:0010482~regulation of epidermal cell division	3	0.001000524	0.051391085	KDF1, SFN, TP63	1066	3	7753	7.272983114	1	1	0.995650719
GOTERM_BP_DIRECT	GO:0060028~convergent extension involved in axis elongation	3	0.001000524	0.051391085	SFRP2, WNT11, WNT5A	1066	3	7753	7.272983114	1	1	0.995650719
GOTERM_BP_DIRECT	GO:0045453~bone resorption	5	0.001667539	0.05261454	NOX4, PTK2B, TNFSF11, HNF1A, PTH1R	1066	11	7753	3.305901416	1	1	0.995650719
GOTERM_BP_DIRECT	GO:0061098~positive regulation of protein tyrosine kinase activity	5	0.001667539	0.05261454	GPRC5B, ACE, WNT3A, DOK7, SRCIN1	1066	11	7753	3.305901416	1	1	0.995650719
GOTERM_BP_DIRECT	GO:0008544~epidermis development	5	0.001667539	0.05261454	SATB1, GRHL1, GRHL2, EGFR, ZNF750	1066	11	7753	3.305901416	1	1	0.995650719
GOTERM_BP_DIRECT	GO:0060384~innervation	5	0.001667539	0.05261454	GABRB3, GABRB2, CHD7, SLITRK6, SULF1	1066	11	7753	3.305901416	1	1	0.995650719
GOTERM_BP_DIRECT	GO:0007157~heterophilic cell-cell adhesion via plasma membrane cell adhesion molecules	5	0.001667539	0.05261454	CDH4, NLGN1, ALCAM, FAT4, SCARF2	1066	11	7753	3.305901416	1	1	0.995650719
GOTERM_BP_DIRECT	GO:0035914~skeletal muscle cell differentiation	9	0.003001571	0.053373402	BTG2, KLF5, WNT3A, MYOD1, MYF6, SCX, SMYD1, MEF2D, KLHL41	1066	31	7753	2.111511227	1	1	0.995650719
GOTERM_BP_DIRECT	GO:0072659~protein localization to plasma membrane	9	0.003001571	0.053373402	ADIPOQ, ANK2, ZDHHC22, ATP1B1, FGF13, ABCA12, RAMP1, SKAP1, SYTL2	1066	31	7753	2.111511227	1	1	0.995650719
GOTERM_BP_DIRECT	GO:0016525~negative regulation of angiogenesis	9	0.003001571	0.053373402	COL4A2, ADGRB3, TNMD, COL4A3, SEMA3E, TEK, SULF1, THBS1, THBS4	1066	31	7753	2.111511227	1	1	0.995650719
GOTERM_BP_DIRECT	GO:0032092~positive regulation of protein binding	11	0.003668587	0.054154566	BMP4, EPHB6, TIAM1, BMP2, ACE, WNT3A, BAMBI, CAV1, WNT5A, CAPRIN2, CTHRC1	1066	42	7753	1.904828911	1	1	0.995650719
GOTERM_BP_DIRECT	GO:0030216~keratinocyte differentiation	8	0.002668063	0.056138599	DSP, CERS3, ST14, WNT5A, IRF6, WNT16, EVPL, TP63	1066	26	7753	2.237840958	1	1	0.995650719
GOTERM_BP_DIRECT	GO:0043065~positive regulation of apoptotic process	18	0.006003142	0.056567069	ZBTB16, UNC5C, BMP7, BMP4, GRIN2A, BMP2, WNT11, SCIN, SFRP2, BCL6, BIN1, ERBB4, KCNMA1, EEF1A2, TRIM35, ITGA6, PHLDA3, TGM2	1066	83	7753	1.577273447	1	1	0.995650719
GOTERM_BP_DIRECT	GO:0009953~dorsal/ventral pattern formation	6	0.002001047	0.057507814	NOG, HOXA2, WNT7A, GLI3, HOXA11, OVOL2	1066	16	7753	2.727368668	1	1	0.995650719
GOTERM_BP_DIRECT	GO:0048701~embryonic cranial skeleton morphogenesis	6	0.002001047	0.057507814	BMP4, PRRX1, WNT9B, GRHL2, FGFR2, RUNX2	1066	16	7753	2.727368668	1	1	0.995650719
GOTERM_BP_DIRECT	GO:0002040~sprouting angiogenesis	6	0.002001047	0.057507814	LEF1, CDH13, PTK2B, SEMA3E, TEK, THBS1	1066	16	7753	2.727368668	1	1	0.995650719
GOTERM_BP_DIRECT	GO:0001755~neural crest cell migration	7	0.002334555	0.057887297	RET, SHH, SEMA3C, ERBB4, HTR2B, ALX1, OVOL2	1066	21	7753	2.424327705	1	1	0.995650719
GOTERM_BP_DIRECT	GO:0010718~positive regulation of epithelial to mesenchymal transition	7	0.002334555	0.057887297	WWTR1, DAB2, BMP2, BAMBI, LEF1, ALX1, AXIN2	1066	21	7753	2.424327705	1	1	0.995650719
GOTERM_BP_DIRECT	GO:0003334~keratinocyte development	4	0.001334031	0.058957955	BCL11B, KDF1, SFN, FOSL2	1066	7	7753	4.155990351	1	1	0.995650719
GOTERM_BP_DIRECT	GO:0034375~high-density lipoprotein particle remodeling	4	0.001334031	0.058957955	LIPC, LIPG, LCAT, ABCG1	1066	7	7753	4.155990351	1	1	0.995650719
GOTERM_BP_DIRECT	GO:0035137~hindlimb morphogenesis	4	0.001334031	0.058957955	TFAP2B, PTCH1, GDF5, HOXD10	1066	7	7753	4.155990351	1	1	0.995650719
GOTERM_BP_DIRECT	GO:2000251~positive regulation of actin cytoskeleton reorganization	4	0.001334031	0.058957955	BAIAP2L1, NTF3, TEK, HRAS	1066	7	7753	4.155990351	1	1	0.995650719
GOTERM_BP_DIRECT	GO:0031668~cellular response to extracellular stimulus	4	0.001334031	0.058957955	P2RX7, SFRP2, SLC1A2, ITGA6	1066	7	7753	4.155990351	1	1	0.995650719
GOTERM_BP_DIRECT	GO:0043691~reverse cholesterol transport	4	0.001334031	0.058957955	LIPG, LCAT, HNF1A, ABCG1	1066	7	7753	4.155990351	1	1	0.995650719
GOTERM_BP_DIRECT	GO:0021846~cell proliferation in forebrain	4	0.001334031	0.058957955	EMX2, WNT3A, FABP7, WNT7A	1066	7	7753	4.155990351	1	1	0.995650719
GOTERM_BP_DIRECT	GO:0000187~activation of MAPK activity	9	0.003001571	0.062949599	P2RX7, ALK, BMP2, GRM4, CD81, EGF, NTF3, FGF1, THBS1	1066	32	7753	2.045526501	1	1	0.995650719
GOTERM_BP_DIRECT	GO:0016055~Wnt signaling pathway	9	0.003001571	0.062949599	DRAXIN, WNT10A, SFRP2, WNT5B, WNT7B, CCDC88C, CPE, WNT16, WLS	1066	32	7753	2.045526501	1	1	0.995650719
GOTERM_BP_DIRECT	GO:0042632~cholesterol homeostasis	9	0.003001571	0.062949599	ABCG8, ABCG5, LIPC, CAV3, CAV1, MTTP, LIPG, LCAT, ABCG1	1066	32	7753	2.045526501	1	1	0.995650719
GOTERM_BP_DIRECT	GO:0030334~regulation of cell migration	9	0.003001571	0.062949599	LAMA1, LMNA, ENPP2, PECAM1, NEXN, PRKX, UNC5C, PHLDA2, SRCIN1	1066	32	7753	2.045526501	1	1	0.995650719
GOTERM_BP_DIRECT	GO:0051897~positive regulation of protein kinase B signaling	10	0.003335079	0.067753901	MC1R, FAM110C, IGF2, NOX4, TNFSF11, TEK, GATA3, THBS1, EGFR, HBEGF	1066	38	7753	1.913942925	1	1	0.995650719
GOTERM_BP_DIRECT	GO:0048661~positive regulation of smooth muscle cell proliferation	5	0.001667539	0.070605141	BMP4, ID2, SERPINF2, CDH13, HBEGF	1066	12	7753	3.030409631	1	1	0.995650719
GOTERM_BP_DIRECT	GO:0048754~branching morphogenesis of an epithelial tube	5	0.001667539	0.070605141	PAK1, EGF, BMP7, GLI2, GDF7	1066	12	7753	3.030409631	1	1	0.995650719
GOTERM_BP_DIRECT	GO:0007389~pattern specification process	5	0.001667539	0.070605141	NRG3, EYA1, SOSTDC1, TBX5, BMP5	1066	12	7753	3.030409631	1	1	0.995650719
GOTERM_BP_DIRECT	GO:0002931~response to ischemia	5	0.001667539	0.070605141	PANX2, UCHL1, CAV1, FAIM2, NDNF	1066	12	7753	3.030409631	1	1	0.995650719
GOTERM_BP_DIRECT	GO:0036342~post-anal tail morphogenesis	5	0.001667539	0.070605141	SFRP2, CHST11, WNT3A, WNT5A, TP63	1066	12	7753	3.030409631	1	1	0.995650719
GOTERM_BP_DIRECT	GO:0010719~negative regulation of epithelial to mesenchymal transition	5	0.001667539	0.070605141	SFRP1, SFRP2, FOXA2, PBLD, OVOL2	1066	12	7753	3.030409631	1	1	0.995650719
GOTERM_BP_DIRECT	GO:0048706~embryonic skeletal system development	7	0.002334555	0.07071272	SHH, WNT11, HOXB9, WNT5A, HOXC5, SCX, SULF1	1066	22	7753	2.314130991	1	1	0.995650719
GOTERM_BP_DIRECT	GO:0009611~response to wounding	6	0.002001047	0.072596103	GRIN2A, MDK, ITGB4, SLC1A2, SLC1A3, NMNAT3	1066	17	7753	2.566935217	1	1	0.995650719
GOTERM_BP_DIRECT	GO:0048863~stem cell differentiation	6	0.002001047	0.072596103	MSX2, EPCAM, HOXD4, HOXA7, ETV4, RUNX2	1066	17	7753	2.566935217	1	1	0.995650719
GOTERM_BP_DIRECT	GO:0050808~synapse organization	6	0.002001047	0.072596103	LRRTM2, WNT7A, SNCG, TNR, TSC1, SEMA3E	1066	17	7753	2.566935217	1	1	0.995650719
GOTERM_BP_DIRECT	GO:0046330~positive regulation of JNK cascade	8	0.002668063	0.07940952	SERPINF2, PTK2B, WNT16, TPD52L1, PLCB1, HRAS, NOX1, TIRAP	1066	28	7753	2.077995176	1	1	0.995650719
GOTERM_BP_DIRECT	GO:0048546~digestive tract morphogenesis	4	0.001334031	0.084940776	SFRP1, SFRP2, AGR2, EGFR	1066	8	7753	3.636491557	1	1	0.995650719
GOTERM_BP_DIRECT	GO:0001709~cell fate determination	4	0.001334031	0.084940776	PTCH1, PTCH2, HOXA2, GATA3	1066	8	7753	3.636491557	1	1	0.995650719
GOTERM_BP_DIRECT	GO:0001953~negative regulation of cell-matrix adhesion	4	0.001334031	0.084940776	BCL6, SEMA3E, HOXA7, THBS1	1066	8	7753	3.636491557	1	1	0.995650719
GOTERM_BP_DIRECT	GO:0060445~branching involved in salivary gland morphogenesis	4	0.001334031	0.084940776	SHH, ESRP2, BMP7, TGM2	1066	8	7753	3.636491557	1	1	0.995650719
GOTERM_BP_DIRECT	GO:0010875~positive regulation of cholesterol efflux	4	0.001334031	0.084940776	PTCH1, ADIPOQ, ABCA12, ABCG1	1066	8	7753	3.636491557	1	1	0.995650719
GOTERM_BP_DIRECT	GO:0040037~negative regulation of fibroblast growth factor receptor signaling pathway	4	0.001334031	0.084940776	WNT5A, SHISA2, SULF1, THBS1	1066	8	7753	3.636491557	1	1	0.995650719
GOTERM_BP_DIRECT	GO:0043407~negative regulation of MAP kinase activity	7	0.002334555	0.085036769	BMP4, UCHL1, CAV3, ADIPOQ, HMGCR, BMP7, SORL1	1066	23	7753	2.2135166	1	1	0.995650719
GOTERM_BP_DIRECT	GO:0008104~protein localization	7	0.002334555	0.085036769	SLC9A2, GRIP1, GRIN2A, CAV1, DHCR24, NRCAM, TNS4	1066	23	7753	2.2135166	1	1	0.995650719
GOTERM_BP_DIRECT	GO:0010811~positive regulation of cell-substrate adhesion	7	0.002334555	0.085036769	VIT, SMOC2, COL26A1, AGR2, VWC2, COL8A1, NDNF	1066	23	7753	2.2135166	1	1	0.995650719
GOTERM_BP_DIRECT	GO:0030324~lung development	9	0.003001571	0.085118391	CCDC39, ZIC3, WNT5A, DHCR7, FGF1, TBX5, SIM2, GLI3, GLI2	1066	34	7753	1.925201413	1	1	0.995650719
GOTERM_BP_DIRECT	GO:0030819~positive regulation of cAMP biosynthetic process	6	0.002001047	0.08962339	MC1R, MC5R, AKAP5, RAMP1, ADCY7, PTHLH	1066	18	7753	2.424327705	1	1	0.995650719
GOTERM_BP_DIRECT	GO:0034613~cellular protein localization	6	0.002001047	0.08962339	CRACR2B, EYA1, WNT3A, WNT5A, DMD, AXIN2	1066	18	7753	2.424327705	1	1	0.995650719
GOTERM_BP_DIRECT	GO:0007519~skeletal muscle tissue development	6	0.002001047	0.08962339	CAV1, ELN, DMD, HOXD10, COL19A1, KLHL31	1066	18	7753	2.424327705	1	1	0.995650719
GOTERM_BP_DIRECT	GO:0035987~endodermal cell differentiation	6	0.002001047	0.08962339	COL4A2, COL11A1, COL12A1, COL8A1, INHBA, MMP9	1066	18	7753	2.424327705	1	1	0.995650719
GOTERM_BP_DIRECT	GO:0048709~oligodendrocyte differentiation	5	0.001667539	0.09130483	SLC8A3, NTRK2, DUSP10, PTPRZ1, GLI3	1066	13	7753	2.797301198	1	1	0.995650719
GOTERM_BP_DIRECT	GO:0006730~one-carbon metabolic process	5	0.001667539	0.09130483	CA12, AHCY, MAT1A, LOC101790524, ALDH1L2	1066	13	7753	2.797301198	1	1	0.995650719
GOTERM_BP_DIRECT	GO:0010800~positive regulation of peptidyl-threonine phosphorylation	5	0.001667539	0.09130483	CEMIP, EGF, WNT5A, BMP7, STOX1	1066	13	7753	2.797301198	1	1	0.995650719
GOTERM_BP_DIRECT	GO:0042771~intrinsic apoptotic signaling pathway in response to DNA damage by p53 class mediator	5	0.001667539	0.09130483	DYRK2, USP28, TP63, TP73, PHLDA3	1066	13	7753	2.797301198	1	1	0.995650719
GOTERM_BP_DIRECT	GO:0030308~negative regulation of cell growth	12	0.004002094	0.092225858	CDA, SFRP1, GJA1, SFRP2, WNT11, CDKN2C, BCL6, CAPRIN2, ENPP1, SLIT3, INHBA, ENO1	1066	52	7753	1.678380719	1	1	0.995650719
GOTERM_BP_DIRECT	GO:0016337~single organismal cell-cell adhesion	8	0.002668063	0.092854376	DSP, ARVCF, RAPGEF1, FAT1, PKP1, PKP3, EGFR, MPZL2	1066	29	7753	2.00634017	1	1	0.995650719
GOTERM_BP_DIRECT	GO:0022407~regulation of cell-cell adhesion	3	0.001000524	0.093502234	EPHA7, LEF1, EFNA5	1066	4	7753	5.454737336	1	1	0.995650719
GOTERM_BP_DIRECT	GO:0072201~negative regulation of mesenchymal cell proliferation	3	0.001000524	0.093502234	WNT11, LMNA, WNT5A	1066	4	7753	5.454737336	1	1	0.995650719
GOTERM_BP_DIRECT	GO:0006940~regulation of smooth muscle contraction	3	0.001000524	0.093502234	CHRNB4, CAV1, ADRA2A	1066	4	7753	5.454737336	1	1	0.995650719
GOTERM_BP_DIRECT	GO:0048333~mesodermal cell differentiation	3	0.001000524	0.093502234	ITGB4, ITGA8, INHBA	1066	4	7753	5.454737336	1	1	0.995650719
GOTERM_BP_DIRECT	GO:0003139~secondary heart field specification	3	0.001000524	0.093502234	BMP4, SMARCD3, AXIN2	1066	4	7753	5.454737336	1	1	0.995650719
GOTERM_BP_DIRECT	GO:0009612~response to mechanical stimulus	3	0.001000524	0.093502234	P2RX7, INHBB, SOST	1066	4	7753	5.454737336	1	1	0.995650719
GOTERM_BP_DIRECT	GO:0003337~mesenchymal to epithelial transition involved in metanephros morphogenesis	3	0.001000524	0.093502234	BMP4, GREM1, SALL1	1066	4	7753	5.454737336	1	1	0.995650719
GOTERM_BP_DIRECT	GO:0002115~store-operated calcium entry	3	0.001000524	0.093502234	CRACR2B, ORAI1, SRL	1066	4	7753	5.454737336	1	1	0.995650719
GOTERM_BP_DIRECT	GO:0032348~negative regulation of aldosterone biosynthetic process	3	0.001000524	0.093502234	BMP2, BMP5, DKK3	1066	4	7753	5.454737336	1	1	0.995650719
GOTERM_BP_DIRECT	GO:2000065~negative regulation of cortisol biosynthetic process	3	0.001000524	0.093502234	BMP2, BMP5, DKK3	1066	4	7753	5.454737336	1	1	0.995650719
GOTERM_BP_DIRECT	GO:1900029~positive regulation of ruffle assembly	3	0.001000524	0.093502234	COBL, EPS8L2, HRAS	1066	4	7753	5.454737336	1	1	0.995650719
GOTERM_BP_DIRECT	GO:0048703~embryonic viscerocranium morphogenesis	3	0.001000524	0.093502234	MTHFD1L, CHST11, HOXA2	1066	4	7753	5.454737336	1	1	0.995650719
GOTERM_BP_DIRECT	GO:0060371~regulation of atrial cardiac muscle cell membrane depolarization	3	0.001000524	0.093502234	GJA1, GJA5, SCN2B	1066	4	7753	5.454737336	1	1	0.995650719
GOTERM_BP_DIRECT	GO:0086002~cardiac muscle cell action potential involved in contraction	3	0.001000524	0.093502234	CACNA2D1, SCN4B, SCN2B	1066	4	7753	5.454737336	1	1	0.995650719
GOTERM_BP_DIRECT	GO:2000647~negative regulation of stem cell proliferation	3	0.001000524	0.093502234	KDF1, FBLN1, OVOL2	1066	4	7753	5.454737336	1	1	0.995650719
GOTERM_BP_DIRECT	GO:0009313~oligosaccharide catabolic process	3	0.001000524	0.093502234	NEU2, NEU4, GM2A	1066	4	7753	5.454737336	1	1	0.995650719
GOTERM_BP_DIRECT	GO:0021978~telencephalon regionalization	3	0.001000524	0.093502234	BMP4, SHH, BMP2	1066	4	7753	5.454737336	1	1	0.995650719
GOTERM_BP_DIRECT	GO:0097237~cellular response to toxic substance	3	0.001000524	0.093502234	OPRD1, ABTB2, PINK1	1066	4	7753	5.454737336	1	1	0.995650719
GOTERM_BP_DIRECT	GO:0002070~epithelial cell maturation	3	0.001000524	0.093502234	GJA1, TMEM79, TFCP2L1	1066	4	7753	5.454737336	1	1	0.995650719
GOTERM_BP_DIRECT	GO:0010524~positive regulation of calcium ion transport into cytosol	3	0.001000524	0.093502234	P2RX7, TRPC3, CAV1	1066	4	7753	5.454737336	1	1	0.995650719
GOTERM_BP_DIRECT	GO:0043401~steroid hormone mediated signaling pathway	3	0.001000524	0.093502234	BMP4, BMP7, NR3C2	1066	4	7753	5.454737336	1	1	0.995650719
GOTERM_BP_DIRECT	GO:0070836~caveola assembly	3	0.001000524	0.093502234	CAV3, CAV2, CAV1	1066	4	7753	5.454737336	1	1	0.995650719
GOTERM_BP_DIRECT	GO:0090037~positive regulation of protein kinase C signaling	3	0.001000524	0.093502234	WNT11, MC1R, WNT5A	1066	4	7753	5.454737336	1	1	0.995650719
GOTERM_BP_DIRECT	GO:0010628~positive regulation of gene expression	19	0.00633665	0.094634757	NTRK2, PTGFR, WNT10A, CAV1, TNC, ANK2, WNT16, ESR1, P2RX7, EDAR, GH1, GJA1, SHH, AGR2, CNTN1, ITGB8, SLC26A9, WNT3, STOX1	1066	95	7753	1.454596623	1	1	0.995650719
