# Supplementary material for: Profiling Analysis of N6-Methyladenosine mRNA Methylation Reveals Differential m6A Patterns during the Embryonic Skeletal Muscle Development of Ducks
Source: Animals (Basel). 2022 Sep 28;12(19):2593. doi: 10.3390/ani12192593 (PMC9559603; doi:10.3390/ani12192593)
Supplement: Supplementary file 1 [file animals-12-02593-s001.zip › Table S15.xls]

Category	Term		Count	%	PValue	Genes	List Total	Pop Hits	Pop Total	Fold Enrichment	Bonferroni	Benjamini	FDR
KEGG_PATHWAY	gga04512	ECM-receptor interaction	28	0.00933822	2.50E-09	LAMA1, ITGB4, COL11A1, TNC, LAMC2, THBS1, THBS4, SV2C, IBSP, SV2B, SPP1, DAG1, ITGB8, TNR, COL27A1, LAMB2, ITGA2, COL3A1, COL2A1, COL4A2, COL4A1, COL4A3, ITGA8, COL4A6, COL4A5, ITGA6, COL6A6, ITGA9	468	73	4324	3.543847325	3.27E-07	3.27E-07	3.07E-07
KEGG_PATHWAY	gga04916	Melanogenesis	26	0.008671205	4.07E-06	WNT2B, ASIP, TCF7, LEF1, ADCY2, ADCY1, FZD10, ADCY8, ADCY7, WNT6, WNT11, HRAS, WNT3, WNT10A, WNT5B, WNT3A, WNT7B, WNT5A, WNT9B, WNT7A, TYR, WNT16, POMC, MC1R, DCT, PLCB1	468	89	4324	2.699126092	5.33E-04	2.67E-04	2.50E-04
KEGG_PATHWAY	gga04510	Focal adhesion	41	0.013673823	7.85E-06	MYLK2, FLT1, LAMA1, ITGB4, COL11A1, RASGRF1, TNC, LAMC2, THBS1, EGFR, THBS4, PAK1, IBSP, SPP1, ITGB8, PAK6, TNR, HRAS, COL27A1, CAV3, LAMB2, ACTN2, EGF, CAV2, ITGA2, CAV1, VEGFA, COL3A1, COL2A1, COL4A2, COL4A1, COL4A3, ITGA8, COL4A6, RAPGEF1, COL4A5, ITGA6, COL6A6, MET, MYL9, ITGA9	468	184	4324	2.058760684	0.001028217	3.43E-04	3.22E-04
KEGG_PATHWAY	gga04020	Calcium signaling pathway	37	0.012339791	1.17E-05	CHRM2, MYLK2, PTGFR, CHRNA7, PTGER3, HTR2B, ATP2A3, ADCY2, CACNA1D, ADCY1, CACNA1C, ADCY8, CACNA1E, ADCY7, EGFR, RYR3, CACNA1G, CACNA1I, GRIN2A, CYSLTR2, ERBB3, ERBB4, PTK2B, NOS1, CACNA1S, NTSR1, TNNC1, TNNC2, PHKA1, PHKB, PHKA2, SLC8A3, P2RX7, P2RX5, ORAI1, SLC25A5, PLCB1	468	161	4324	2.123321123	0.001535397	3.84E-04	3.61E-04
KEGG_PATHWAY	gga04310	Wnt signaling pathway	27	0.009004712	2.91E-04	WNT2B, TCF7, LEF1, PRICKLE1, FZD10, WNT6, WNT11, SOX17, WIF1, SOST, WNT3, WNT10A, WNT5B, WNT3A, WNT7B, WNT5A, WNT9B, WNT7A, AXIN2, WNT16, DKK1, DKK2, SFRP1, SFRP2, DAAM2, BAMBI, PLCB1	468	119	4324	2.096315449	0.037468307	0.007636544	0.00717019
KEGG_PATHWAY	gga04080	Neuroactive ligand-receptor interaction	45	0.015007854	0.001558522	GABRB3, CHRM2, GLP1R, OPRD1, PTGFR, GABRB2, THRB, CHRNA2, NPFFR1, CHRM4, CHRNA7, MLNR, PTGER3, OPRL1, HTR2B, LPAR2, GRIK4, GRIK1, PTH1R, GRIN2A, GRM4, CYSLTR2, CHRNG, HRH3, CNR1, GRM8, P2RY1, S1PR1, NTSR1, GABRA2, GABRP, GABBR2, CHRNB4, HTR1F, HTR1B, PRLR, GRIN2B, GABRG3, ADRA2A, P2RX7, MTNR1A, P2RX5, MC1R, MC5R, APLNR	468	262	4324	1.586905461	0.184803113	0.034027725	0.031949696
KEGG_PATHWAY	gga04514	Cell adhesion molecules (CAMs)	23	0.007670681	0.00250947	NTNG1, NLGN1, CNTNAP1, CADM1, SDC3, CLDN1, PTPRF, CLDN10, VCAN, CLDN4, CDH4, ALCAM, CDH3, CLDN14, PECAM1, ITGA8, CNTN1, ITGB8, ITGA6, NRCAM, NCAM2, CD99, ITGA9	468	109	4324	1.949580491	0.280467641	0.046962944	0.044094978
KEGG_PATHWAY	gga04261	Adrenergic signaling in cardiomyocytes	23	0.007670681	0.003573392	TPM3, TNNC1, CACNA2D1, TPM1, CACNA2D3, ATP1B4, ADCY2, PPP2R3B, CACNA1D, ADCY1, CACNA1C, ADCY8, ATP1B1, ADCY7, ACTC1, MYL3, CACNG1, CACNA1S, PLCB1, CACNG3, SCN4B, CACNG4, CREB5	468	112	4324	1.897359585	0.37434283	0.05621646	0.052783393
KEGG_PATHWAY	gga04260	Cardiac muscle contraction	15	0.005002618	0.0038622	TPM3, TNNC1, CACNA2D1, TPM1, CACNA2D3, ATP1B4, CACNA1D, CACNA1C, ATP1B1, ACTC1, MYL3, CACNG1, CACNA1S, CACNG3, CACNG4	468	60	4324	2.30982906	0.397656679	0.05621646	0.052783393
KEGG_PATHWAY	gga04350	TGF-beta signaling pathway	17	0.005669634	0.004676256	FST, NOG, INHBB, INHBA, BMP7, THBS1, GDF5, LTBP1, BMP6, GDF7, BMP5, BMP4, BMP2, ACVR1C, BAMBI, ID2, AMH	468	74	4324	2.122545623	0.458832434	0.061258952	0.057517947
KEGG_PATHWAY	gga00100	Steroid biosynthesis	7	0.002334555	0.006715182	SQLE, NSDHL, MSMO1, DHCR24, DHCR7, HSD17B7, FDFT1	468	17	4324	3.804424334	0.58631721	0.079971717	0.075087948
KEGG_PATHWAY	gga00512	Mucin type O-Glycan biosynthesis	8	0.002668063	0.017349735	GALNT6, ST6GALNAC1, GALNT14, GALNT13, GALNT1, GCNT1, GCNT4, GALNTL6	468	26	4324	2.842866535	0.899012918	0.18940127	0.17783478
KEGG_PATHWAY	gga01230	Biosynthesis of amino acids	12	0.004002094	0.038621352	RPIA, ARG2, CPS1, GPT2, PAH, ENO1, MAT1A, SDSL, ENO2, GAPDH, PFKM, GLUL	468	57	4324	1.945119208	0.99425651	0.376436365	0.353447885
KEGG_PATHWAY	gga02010	ABC transporters	9	0.003001571	0.040229841	ABCC3, ABCG8, ABCG5, ABCC8, ABCC5, TAP2, ABCC9, ABCA12, ABCG1	468	37	4324	2.247401247	0.995387793	0.376436365	0.353447885
KEGG_PATHWAY	gga04010	MAPK signaling pathway	32	0.010672252	0.043935773	RASGRF2, RASGRF1, HSPB1, CACNA1D, CACNA1C, FGF1, CACNA1E, EGFR, FGF3, CACNA1G, CACNA1I, PAK1, DUSP10, NTF3, CACNG1, CACNA1S, HRAS, CACNG3, CACNG4, DUSP4, NTRK2, MEF2C, GADD45B, EGF, DUSP1, CACNA2D1, CACNA2D3, HSPA2, MAPK8IP1, FGF13, FGFR3, FGFR2	468	211	4324	1.401223316	0.997221528	0.383705754	0.360273342
KEGG_PATHWAY	gga04340	Hedgehog signaling pathway	6	0.002001047	0.068114793	SHH, PTCH1, PTCH2, GLI1, GLI3, GLI2	468	21	4324	2.63980464	0.999903066	0.538662794	0.505767356
KEGG_PATHWAY	gga00220	Arginine biosynthesis	5	0.001667539	0.069902805	ARG2, CPS1, GPT2, NOS1, GLUL	468	15	4324	3.07977208	0.999924628	0.538662794	0.505767356
KEGG_PATHWAY	gga01040	Biosynthesis of unsaturated fatty acids	6	0.002001047	0.094376861	FADS2, ACOT7, SCD, TECR, ELOVL6, ACOX3	468	23	4324	2.41025641	0.999997708	0.652835662	0.612967836
KEGG_PATHWAY	gga04810	Regulation of actin cytoskeleton	26	0.008671205	0.094686088	CHRM2, CYFIP2, MYLK2, ITGB4, CHRM4, FGF1, EGFR, FGF3, PAK1, SCIN, ITGB8, PAK6, HRAS, ACTN2, EGF, ITGA2, SSH2, TIAM1, ITGA8, ARHGEF4, ITGA6, FGF13, FGFR3, MYL9, FGFR2, ITGA9	468	177	4324	1.357187696	0.999997809	0.652835662	0.612967836
