# Supplementary material for: Profiling Analysis of N6-Methyladenosine mRNA Methylation Reveals Differential m6A Patterns during the Embryonic Skeletal Muscle Development of Ducks
Source: Animals (Basel). 2022 Sep 28;12(19):2593. doi: 10.3390/ani12192593 (PMC9559603; doi:10.3390/ani12192593)
Supplement: Supplementary file 1 [file animals-12-02593-s001.zip › Table S16.xls]

Gene id	Peak_Specific	Diff_Gene_logFC
TECR	Treat	1.202854916
LOC101799421	Treat	1.093188102
ADIPOQ	Treat	1.973729529
FAM124B	Treat	1.801381041
ASB12	Treat	1.720783144
NOX1	Treat	2.592732364
LSMEM1	Treat	1.512352976
ARHGAP36	Treat	1.688330451
KBTBD13	Treat	1.610656077
FSD2	Treat	4.388289021
HEPHL1	Treat	1.777474838
GATM	Treat	2.26733488
PHKB	Treat	1.078425167
SSUH2	Treat	2.822261654
LOC106017218	Treat	2.516858632
e7bb50bc-fcf9-4091-9232-ba712214c2fa	Treat	1.649565794
DOCK3	Treat	1.249390842
SLC38A3	Treat	2.036096316
c6ab9e5e-e050-4f48-94db-f2637de9a67f	Treat	1.073754593
CCDC36	Treat	2.581493263
ABTB1	Treat	1.056118047
GPX3	Treat	1.806331016
SYT17	Treat	1.39569837
NPTX2	Treat	1.510875472
SERPIND1	Treat	1.513342089
LOC101797313	Treat	1.36896864
PTGS1	Treat	1.495667279
CLIC3	Treat	2.686470946
PRRT1B	Treat	1.169253417
KCNT1	Treat	4.366743091
LOC106016586	Treat	1.145932372
PECAM1	Treat	1.187835957
SLC16A5	Treat	2.035579278
CACNG1	Treat	2.435558832
TMEM38A	Treat	1.491948072
GAMT	Treat	2.2833321
TEKT1	Treat	1.743989435
AMH	Treat	2.718957688
MYLK2	Treat	2.204630802
LOC101793871	Treat	3.160071624
RIMS4	Treat	1.03480533
LOC101793813	Treat	1.949354639
LOC113845719	Treat	1.504389629
TTC34	Treat	1.118576734
LOC101798236	Treat	1.184095648
RNF207	Treat	2.311570394
PPP3CC	Treat	1.138600895
KCNJ5	Treat	1.805101828
SCN4B	Treat	1.530885781
SMIM35	Treat	3.70700042
USP2	Treat	1.58812535
ZBTB16	Treat	1.095176026
LOC106018323	Treat	1.147235749
SCN4A	Treat	2.132928705
ERBB3	Treat	1.554491732
GPR182	Treat	1.018029203
GRASP	Treat	1.058001895
LOC113839962	Treat	4.179751275
SKAP1	Treat	2.081268113
NDUFA4L2	Treat	1.432259725
LOC101794290	Treat	2.22729816
DNAI1	Treat	1.801368464
LRRC2	Treat	4.168201632
TDRD7	Treat	1.157080976
59a1cbb0-fe9a-4f22-bbe6-3ea472c4d219	Treat	1.201737698
2720109b-5091-4fd6-bfce-b4c883796faf	Treat	2.202193353
LOC101802407	Treat	2.212692527
b8ecad53-b882-45bc-a075-f70d98302a5d	Treat	1.941125767
MAMDC2	Treat	1.918036288
ff62ceb2-fed5-47d8-83b1-bde7f6a2a413	Treat	1.421471877
3cc54871-bab7-4931-a9e4-b81a9be70f3e	Treat	1.053658813
LOC101801710	Treat	1.871253048
70bacbe3-e205-432c-b776-002425ec601d	Treat	1.190528762
LOC101801209	Treat	1.448028399
LOC101800493	Treat	1.688702324
LOC101805092	Treat	1.077072146
LOC113841946	Treat	1.105080406
DHRS12	Treat	1.140350295
TEAD4	Treat	1.628991978
LOC101794949	Treat	1.739744552
NT5DC3	Treat	2.029764902
LOC101796281	Treat	1.051349398
LOC110351446	Treat	1.137249169
TSPAN12	Treat	1.146461856
STRIP2	Treat	1.40571432
LOC101803585	Treat	2.247252979
88f77f02-d475-4f3f-a47a-09b197acd755	Treat	2.257349218
LOC101801378	Treat	2.089857847
LOC101800998	Treat	1.404096806
PDK4	Treat	3.097214488
SLC4A7	Treat	1.119008973
LOC101800940	Treat	3.988227682
ADCY1	Treat	2.846600668
COBL	Treat	2.262775272
C2H18orf63	Treat	2.275921084
MC5R	Treat	1.549453748
216b72b6-32ee-4145-ac81-235fa4c46da7	Treat	1.352075448
LCA5L	Treat	1.224217834
SPACA1	Treat	2.71322813
EPHX1	Treat	1.6387336
ARHGEF33	Treat	2.134270925
KLHDC3	Treat	1.344941118
EPM2A	Treat	1.076395396
f25f9df0-c105-4360-bb52-3e19f566cf99	Treat	1.219968651
KLHL32	Treat	3.194848585
MLIP	Treat	2.427149392
ELOA	Treat	1.209992151
SLC9B2	Treat	1.34865703
98f3fe9b-f396-4f83-bc6c-cc2aa9cf0d7f	Treat	1.780116496
RASSF6	Treat	1.296197921
UGT8	Treat	2.37016978
FGL1	Treat	1.383461148
LOC101793524	Treat	1.256616657
DYSF	Treat	1.530597556
5ed4af64-d151-443f-8cb1-e331006706ab	Treat	1.130269415
PNPLA2	Treat	1.037702009
LOC101801251	Treat	2.526181109
SFTPA	Treat	4.176465214
HECTD2	Treat	1.880194959
NPFFR1	Treat	3.73605816
LRRC20	Treat	4.072978352
DNAH7	Treat	1.083935898
TFCP2L1	Treat	1.406701331
RAMP1	Treat	2.44003919
ITGA6	Treat	1.567333375
PRKAG3	Treat	1.919419167
PLCD4	Treat	1.551263261
TMEM275	Treat	1.41664096
ADGRL4	Treat	1.769404962
FAM13C	Control	1.27557542
32f1b8b5-058d-423f-8980-7d98c545c151	Control	1.884784717
ATP1B4	Control	1.587940623
CHRNB4	Control	1.176950185
LCAT	Control	1.411979959
NLRC5	Control	1.025026218
LOC101797129	Control	1.282808374
HAGH	Control	1.73959124
LOC101804932	Control	2.848955362
RIMBP2	Control	1.513685436
ZDHHC12	Control	1.206669729
LHX6	Control	1.224917071
LOC113845643	Control	1.768403267
LOC110354301	Control	2.465294687
TGM2	Control	2.384517585
PINK1	Control	1.044861985
22cd77b5-bcfd-4188-8141-153c8969609f	Control	1.437150142
LOC101796567	Control	1.094614786
APOA1	Control	1.016410299
01bc8665-e9e3-449a-b671-64acbfe92d99	Control	1.291684817
G6PC	Control	1.95928658
ddb5325f-dbcd-4e14-853b-4d16b4b39f0a	Control	2.488591551
ATF7	Control	1.101544743
DMGDH	Control	1.876160749
c46bd0c3-f507-4d22-8b5d-6203d336e3b1	Control	1.956544445
DGKI	Control	1.529317805
CACNA2D1	Control	1.919221667
LOC101804833	Control	1.1954414
AMPH	Control	1.173200611
LOC101799158	Control	1.96846146
VWA3B	Control	1.256586689
LOC106017580	Control	1.053666995
ENPP1	Control	1.674476863
SH3TC1	Control	1.158375752
SOD3	Control	1.174187457
d538aa3b-7335-42f1-ab4d-70e92a6ad742	Control	1.205354632
CAPN3	Control	2.349813969
LOC101795725	Control	1.63296641
e71c2772-371b-4188-a134-ce1303e2720c	Control	1.014761867
MYOD1	Control	1.441559236
PDZD7	Control	1.07780666
e3138c06-1d9c-4aea-a4cd-691052c25586	Control	1.344614359
IQCA1	Control	1.154112522
LOC101792439	Control	1.423374606
PTGER3	Control	1.84851287
SERPINI1	Treat	-1.251720659
SNORC	Treat	-3.892046279
CNGB1	Treat	-2.047610357
DPEP1	Treat	-1.448804332
SMPD3	Treat	-3.564026169
RADIL	Treat	-2.16294951
BAIAP2L1	Treat	-1.436663951
LOC101797312	Treat	-1.872910534
NUDT1	Treat	-1.129650682
SOCS3	Treat	-1.051049058
RBPJL	Treat	-4.833133638
KCNQ2	Treat	-2.606137613
DRAXIN	Treat	-1.440749926
TMEM88B	Treat	-2.605615122
90f94d91-05c3-431c-affe-ba3ffa853938	Treat	-4.062327909
TIRAP	Treat	-1.530090035
LOC101802115	Treat	-1.897860788
GRIK4	Treat	-1.394514323
SORL1	Treat	-1.028071625
LOC101795107	Treat	-2.993236417
TNS4	Treat	-4.336672012
COL2A1	Treat	-3.67672749
ASIC2	Treat	-2.110383825
LOC101801676	Treat	-5.111239431
RAB27B	Treat	-2.494045422
LOC113840221	Treat	-1.29862218
DPT	Treat	-1.293809135
MB	Treat	-2.045749324
NRCAM	Treat	-1.444863608
PRKAR2B	Treat	-1.743487473
SCEL	Treat	-3.80266517
PTPRN2	Treat	-2.014551713
SPAG6	Treat	-2.517774652
LOC101799338	Treat	-4.648210825
CPA6	Treat	-3.612637382
EXO1	Treat	-1.02595384
LOC113843304	Treat	-3.376609983
PKDCC	Treat	-1.127889864
RGS17	Treat	-1.765976868
MARCH1	Treat	-1.20471277
DMP1	Treat	-3.728762307
IBSP	Treat	-5.938707012
LOC101796809	Treat	-1.194818695
GALNTL6	Treat	-1.45623278
MSMO1	Treat	-2.188349827
C4H4orf48	Treat	-1.988644018
PRKCH	Treat	-1.598967113
GSC	Treat	-1.1637019
ZDHHC22	Treat	-2.743321512
CHST1	Treat	-2.291962008
58c7a679-216b-4a68-901c-cc7918adf875	Treat	-1.167884316
SMOC1	Treat	-1.824452878
8dcc3865-dea9-4d35-9d0c-a79674f53151	Treat	-1.387492417
SNCG	Treat	-1.457973751
PCBD1	Treat	-3.908898966
WLS	Treat	-1.248981986
PTGS2	Treat	-1.863186355
e414c170-6eaf-4ed6-9b93-bc8345118f1f	Control	-1.721494389
HSD17B7	Control	-1.075806868
PATJ	Control	-1.248837827
ASTN1	Control	-1.670590924
LOC101799094	Control	-3.487063165
MME	Control	-2.534099992
LOC101795342	Control	-2.22745267
SOX2	Control	-2.245322696
LOC101801861	Control	-6.875772948
TP63	Control	-3.346155803
GABRB2	Control	-2.237389925
LOC101801425	Control	-3.627574411
PAX3	Control	-1.459716338
PCOLCE2	Control	-1.212177669
b247677f-f784-4311-ad9f-46241127a24a	Control	-1.198872031
VGLL1	Control	-2.301380391
ZIC3	Control	-9.371799412
LOC101797872	Control	-1.012815149
FAM19A2	Control	-2.687494895
IL13RA2	Control	-2.141896341
CERS3	Control	-5.042347796
CFAP161	Control	-1.392973032
BNC1	Control	-2.423503709
TRPM1	Control	-2.69732619
LOC101795178	Control	-1.244030852
MCTP2	Control	-3.137557367
a8ceebf4-7eea-40a5-a2ec-935e112fb519	Control	-1.17767634
ISLR	Control	-1.763585863
HSD11B2	Control	-5.958383492
NDRG4	Control	-1.328552727
CHRNA7	Control	-1.556627819
FAM81A	Control	-1.469659461
CDH8	Control	-1.14483164
ZNF536	Control	-1.898001614
IRX3	Control	-4.530240277
ESRP2	Control	-5.349928203
FAM107A	Control	-2.854883237
SFMBT2	Control	-2.040560528
WNT7A	Control	-4.430508004
LOC113845030	Control	-1.180709972
CNTN4	Control	-1.670080879
CACNA1D	Control	-2.473724275
LOC101805470	Control	-5.752999608
NRG2	Control	-3.281101193
LOC106019744	Control	-1.201875467
SOWAHA	Control	-1.967530582
FAT2	Control	-5.061196638
FAM83G	Control	-2.609427592
CRYM	Control	-1.61691911
PAK1	Control	-2.720462186
CACNG3	Control	-1.376792833
C1QTNF8	Control	-4.389112836
SYTL2	Control	-3.517581326
LOC101804267	Control	-4.292380415
LOC101789961	Control	-1.768025429
LOC101801165	Control	-2.035045307
GRIN2A	Control	-1.647296655
GLT1D1	Control	-1.427974553
GGT1	Control	-2.01391067
SLC7A4	Control	-1.328371983
NOS1	Control	-1.665362971
RTN4R	Control	-1.186299165
LOC101797522	Control	-3.639849733
LOC101797703	Control	-1.434604388
LOC101794161	Control	-3.116683726
TMEM268	Control	-2.604613708
LMX1B	Control	-6.47572933
PRRX2	Control	-3.07315464
NOG	Control	-5.319641359
cf67d02f-9fdb-4d82-b39b-61991c5d8f4a	Control	-1.051049058
ITGB4	Control	-1.660756002
LOC113845533	Control	-2.364651369
4eb8964c-c8c3-47c9-929b-61a7686374e8	Control	-2.389073159
PIRT	Control	-3.411674948
LOC101792538	Control	-4.141367891
CNMD	Control	-7.548674535
CRLF1	Control	-2.507213671
GDAP1L1	Control	-1.087814326
TFAP2C	Control	-6.275590628
COL9A3	Control	-7.26175991
GDF5	Control	-5.900556712
RIPOR3	Control	-1.649325487
KCNG1	Control	-3.662773313
BMP7	Control	-2.332226946
8dd127f1-6253-4041-821d-da1f2fe393ff	Control	-5.117193194
RBBP8NL	Control	-5.578879844
AJAP1	Control	-3.185484593
PLCH2	Control	-3.008814104
SFRP1	Control	-2.673577296
GJB3	Control	-1.718283193
TFAP2E	Control	-4.44754728
SFN	Control	-5.621981596
DLGAP3	Control	-1.043767557
RSPO1	Control	-5.516978372
CRYBG2	Control	-4.491057483
OPRD1	Control	-2.71806588
RASL11A	Control	-3.819217531
POU2F3	Control	-4.12735839
OPCML	Control	-1.464403107
MLLT11	Control	-1.41891188
GMIP	Control	-2.157864468
OLFM2	Control	-1.45756106
MTUS2	Control	-1.184179277
WNT2B	Control	-3.092455146
LGR6	Control	-5.584757371
LOC113840609	Control	-2.939463464
KCND3	Control	-3.534772561
SCUBE3	Control	-4.390995018
PRKX	Control	-1.033032185
WNT3	Control	-7.615628495
ZNF385C	Control	-2.813726337
LOC101793676	Control	-6.127227281
LOC101792676	Control	-5.210809862
SOST	Control	-2.976059482
ASB9	Control	-2.281458798
LOC101800911	Control	-3.894842775
LOC101799146	Control	-6.208704971
LOC101799579	Control	-2.408401213
LOC106020364	Control	-2.94515102
GALNT6	Control	-1.607764871
HOXC10	Control	-7.937459333
HOXC9	Control	-3.230401316
LOC101790674	Control	-6.290189511
LOC101800206	Control	-1.016000784
WNT9B	Control	-7.947927165
HOXB1	Control	-3.862685969
RIPK4	Control	-4.55760058
LOC101797392	Control	-2.103036214
SLC4A8	Control	-2.681024681
TMEM106C	Control	-1.018540552
RSPH1	Control	-1.072747454
ATP8B1	Control	-1.743613351
CCDC68	Control	-1.348421367
LOC101800581	Control	-1.17052645
SPEF2	Control	-4.063231925
dec7ae8c-a586-48bf-a681-1eb310b2d7b2	Control	-1.31449263
ADGRV1	Control	-2.774602535
THBS4	Control	-1.331616781
SV2C	Control	-3.492651053
42355edd-3254-4090-b137-58f0aac24bed	Control	-1.117642524
MLLT3	Control	-1.168950268
LOC101802994	Control	-1.008913646
2587607d-c4fa-446a-a23a-ed4b32c2afcf	Control	-1.187187534
da8aee8a-6531-41da-b575-e6e3c8f58080	Control	-2.905755031
ROR2	Control	-2.972321087
HEMGN	Control	-2.116818765
LOC113841043	Control	-1.093584359
ATP7B	Control	-1.456347614
LPAR5	Control	-1.899620893
LMNTD1	Control	-2.363201633
WNT7B	Control	-6.420363181
PTPRO	Control	-3.325876702
FAM180A	Control	-2.113609077
PPFIA2	Control	-1.99772006
SLC6A15	Control	-2.848556178
KERA	Control	-1.907482963
TMEM117	Control	-2.023664875
PCLO	Control	-1.960041216
SEMA3E	Control	-4.711099953
LOC101804347	Control	-1.29474256
WNT3A	Control	-6.351619197
ITGBL1	Control	-2.641908635
TFAP2A	Control	-7.200668526
NRN1	Control	-2.346110869
LOC101799119	Control	-5.292897575
GABBR2	Control	-1.160752625
EDAR	Control	-6.43812364
LOC101801046	Control	-4.938079042
C2H8orf34	Control	-1.138816521
RALYL	Control	-1.280683112
GRHL2	Control	-6.18382194
BAALC	Control	-3.337334227
SHH	Control	-7.461338539
ADARB2	Control	-3.043489094
GPR158	Control	-2.016780988
LOC101791330	Control	-1.068547134
DLX5	Control	-6.299147245
ETV1	Control	-1.351260656
SOSTDC1	Control	-4.658378901
AGR2	Control	-5.645578392
TMEM196	Control	-3.474710047
MACC1	Control	-5.590690865
0e8ccec0-02d2-4a5f-8d24-be8a298e0e4b	Control	-5.34691265
RNF182	Control	-3.655917776
BMP6	Control	-1.548860548
LOC101799383	Control	-3.816275679
SERPINB5	Control	-4.427734185
IRX2	Control	-6.621886694
APCDD1	Control	-2.896211038
SNTG1	Control	-1.746073966
LOC101799153	Control	-5.000430438
TAF4B	Control	-1.461073895
PENK	Control	-3.037569682
TOX	Control	-1.325407077
RGS22	Control	-2.363300639
TMEM74	Control	-2.981023975
TNFRSF11B	Control	-2.611133839
KCNQ3	Control	-2.911748735
FAM83H	Control	-2.80327416
EPPK1	Control	-4.459463999
NDP	Control	-2.202684991
KIF26B	Control	-6.382259014
VIT	Control	-6.578800792
PCNX2	Control	-2.105611409
RAB32	Control	-1.690584555
MTHFD1L	Control	-1.101684912
97717df5-85c9-409c-b480-491de14099c4	Control	-1.558478766
MOXD1	Control	-2.448042071
DSCAM	Control	-3.08765188
CD24	Control	-1.674187464
SIM1	Control	-5.442915107
COL9A1	Control	-8.457039382
KHDRBS2	Control	-2.826852679
LOC113843303	Control	-3.592839847
HMGCLL1	Control	-1.232314092
GREB1	Control	-2.647646058
RUNX1	Control	-1.944677095
TFAP2B	Control	-7.459846818
KCNH1	Control	-2.793340177
LOC101799042	Control	-2.206784762
FOXA2	Control	-10.13238486
FBLN7	Control	-1.18484191
LOC101802171	Control	-3.401993966
56fb2542-d47f-43af-8248-141f5cbedb62	Control	-3.209454493
SYNDIG1	Control	-3.350124216
HTR1F	Control	-4.158040499
ADGRG6	Control	-1.443757566
MYB	Control	-1.31903612
CLVS2	Control	-2.49706634
CRYBG1	Control	-3.71707792
FAM83B	Control	-6.217485253
a26674a7-e408-4bc5-85b5-4330e45b02e1	Control	-1.360336906
FAM110C	Control	-4.823805557
PTK2B	Control	-1.417855439
SH2D4A	Control	-3.129112931
MTNR1A	Control	-2.342017454
HAND2	Control	-3.35297302
SLC7A11	Control	-2.734042335
TRPC3	Control	-1.926981695
GABRA2	Control	-2.514044192
BEND4	Control	-1.021190317
ARAP2	Control	-3.588071305
UPK1B	Control	-1.180546514
FGFBP1	Control	-4.840126092
STK32B	Control	-2.168106669
FBXO41	Control	-2.644672278
CDS1	Control	-1.675074304
SCNN1A	Control	-3.308556743
HMX1	Control	-3.225313501
FOXI3	Control	-4.49690718
C1S	Control	-1.407564112
LOC101797054	Control	-6.112028238
AKAP5	Control	-1.593836034
a6d424a7-18e6-4058-9230-514ff4e07f2a	Control	-1.588332091
LOC101801566	Control	-1.486266337
NTF3	Control	-2.128727364
CEND1	Control	-1.438128918
PAK6	Control	-3.068831837
LOC101790054	Control	-2.047737697
STXBP6	Control	-1.165701081
LUZP2	Control	-1.839761997
ANO3	Control	-1.144637598
RIBC2	Control	-3.348311942
613b2c34-b28f-43e1-8b9d-63b35761a22f	Control	-2.589531923
SLC24A4	Control	-1.642042445
BBOF1	Control	-1.16609086
c458ca0c-be36-4e62-b603-1d463b9fe4d8	Control	-1.041523673
LOC106017830	Control	-2.682862186
RAB15	Control	-3.315383155
ABTB2	Control	-1.957040308
ELF5	Control	-5.94756401
CFAP46	Control	-1.192245295
FGFR2	Control	-4.209786577
LOC106017841	Control	-2.506369267
COL17A1	Control	-5.836555544
SLIT1	Control	-1.99612314
CNNM1	Control	-2.483343011
GDF10	Control	-2.914697774
LRMDA	Control	-1.040424009
CHST11	Control	-2.656585848
EMX2	Control	-3.973853889
CFAP58	Control	-1.023536013
ASCL4	Control	-7.848423466
LOC101794817	Control	-1.617209563
LOC106020238	Control	-4.288982123
CCDC83	Control	-4.228233901
LOC101795292	Control	-1.744653537
GPR39	Control	-1.749675422
FAM83F	Control	-4.739036974
MLPH	Control	-1.501900272
HOXD10	Control	-2.586910055
LOC113844117	Control	-4.054757849
LOC101804634	Control	-4.091434461
INHBB	Control	-2.603064409
THSD7B	Control	-1.336239047
EN1	Control	-3.809792785
C1QL2	Control	-3.844571399
WNT10A	Control	-5.567623796
WNT6	Control	-5.854616961
LOC101802962	Control	-1.25402271
GLIS1	Control	-6.783208406
ALX1	Control	-4.798243469
LOC101803314	Control	-1.272449265
LOC101795149	Control	-1.167837132
