# Supplementary material for: Profiling Analysis of N6-Methyladenosine mRNA Methylation Reveals Differential m6A Patterns during the Embryonic Skeletal Muscle Development of Ducks
Source: Animals (Basel). 2022 Sep 28;12(19):2593. doi: 10.3390/ani12192593 (PMC9559603; doi:10.3390/ani12192593)
Supplement: Supplementary file 1 [file animals-12-02593-s001.zip › Table S17.xls]

Geneid	T1	T2	T3	C1	C2	C3	logFC	PValue	FDR	T1_IP	T2_IP	T3_IP	T1_Input	T2_Input	T3_Input	C1_IP	C2_IP	C3_IP	C1_Input	C2_Input	C3_Input	logFC	PValue	FDR	Treat|Control
LOC101799119	0.05623672	0	0.063257456	3.230909147	1.362731542	1.244611467	-5.292897575	6.04E-05	0.000503292	0	2	1	3	16	0	181	106	74	75	27	43	-4.830647014	4.73E-08	0.000971725	NA|peak_3249
SOWAHA	0.083336467	0.047384346	0.26950366	0.670297932	0.563105883	0.669683269	-1.967530582	0.004886883	0.017180087	21	4	5	26	29	19	49	47	49	56	59	5	-1.723589165	0.029656443	118.1410295	NA|peak_13255
LPAR2	0.380996955	0.504160245	0.571415449	1.698057105	1.441880733	2.567346806	-1.652688464	0.000154325	0.001046131	25	40	16	26	66	3	80	93	83	62	27	28	-1.497136889	0.005646252	30.75927341	peak_16668|peak_17422
PCLO	0.012964318	0.007371392	0.025519929	0.037241266	0.080048377	0.102472057	-1.960041216	0.004747679	0.016769737	0	0	0	0	0	1	5	5	3	0	1	0	-13.90241985	0	0	NA|peak_2680
WNT3	0	0	0	0.436202818	0.495334664	0.320065022	-7.615628495	7.80E-05	0.000614861	2	0	2	1	2	6	21	38	38	14	23	8	-2.286263437	0.000294822	2.505530746	NA|peak_17799
ASTN1	0.041932247	0.028610747	0.041271279	0.102386294	0.166094037	0.176767591	-1.670590924	0.00242759	0.009666304	2	2	6	6	3	3	27	41	35	18	18	22	-1.175169064	0.041308186	152.1919546	NA|peak_10381
AHRR	0.095478569	0.270234764	0.047732603	0.390075008	0.524030104	0.335412439	-1.260218212	0.041958332	0.099320691	0	3	0	0	3	2	16	19	13	3	10	10	-2.023221212	0.000806972	6.123231556	NA|peak_4160
CAPNS2	0.108375975	0.160216107	0.1980971	4.265091458	3.674117094	2.855403863	-4.223830813	1.89E-07	8.54E-06	7	28	21	22	38	13	423	493	377	268	222	185	-1.4826213	0.010130671	50.44636807	NA|peak_12377
SERPINB5	0.113206374	0.014712709	0.054574006	1.951178027	1.537411014	1.482813775	-4.427734185	1.20E-05	0.00014798	2	1	5	6	13	0	67	60	40	38	21	30	-2.415530435	0.000486873	3.978533951	NA|peak_4104
RBPJL	0.015855631	0.014424585	0.124845618	2.004061146	1.285641119	2.055337547	-4.833133638	1.97E-05	0.000214787	17	29	16	1	0	3	406	320	343	199	129	158	-3.065618344	0.000731422	5.68532982	NA|peak_16225
AGR2	0	0	0.091953194	2.583107815	1.638062688	1.766133231	-5.645578392	3.38E-05	0.000324935	1	2	0	1	1	5	8	15	20	8	0	8	-2.977480838	1.65E-06	0.022666354	NA|peak_3832
LOC101801046	0.050645169	0.115185505	0.178024504	5.237394565	3.988519424	3.662814315	-4.938079042	2.62E-07	1.01E-05	5	4	3	4	6	4	45	60	70	35	21	29	-1.376826763	0.012885873	60.39160869	NA|peak_3405
CDH8	0.048837785	0.0565472	0.04494667	0.153045049	0.128274976	0.135692483	-1.14483164	0.014461369	0.042067387	8	6	15	2	2	4	6	9	21	2	0	1	-1.724333385	0.029620065	118.3660065	NA|peak_12452
LOC101801566	0.074483292	0.024393896	0.010053837	0.109547783	0.113846501	0.169553647	-1.486266337	0.034472675	0.084971471	0	0	1	2	0	0	5	5	12	0	2	1	-4.094095202	4.52E-20	1.80E-15	NA|peak_752
SLC39A8	0.089292563	0.067694571	0.133920099	1.162807193	1.123481781	1.317461232	-3.314170306	4.44E-06	7.10E-05	0	2	2	0	0	0	15	9	15	8	3	5	-3.830639195	3.88E-07	0.00633359	NA|peak_6184,peak_6183
LOC101804844	0.078501318	0.071416201	0.044150812	0.8569102	0.768215782	0.889364792	-3.318827348	1.43E-05	0.000169299	27	11	6	76	32	6	50	45	50	35	29	32	-2.11064407	0.004069216	23.68635908	NA|peak_7243
LOC106017841	0.038468979	0.052495456	0.025962927	0.37129979	0.215119057	0.255414605	-2.506369267	0.000102878	0.000762996	2	1	7	5	4	4	24	30	23	21	17	4	-1.415499159	0.01538205	68.5614273	NA|peak_8593
LOC101794817	0.197424197	0.168380367	0.180432799	0.808146341	0.563499395	0.728220573	-1.617209563	0.000503346	0.00269753	24	12	20	35	21	18	151	109	89	62	36	56	-1.723661184	0.001745003	11.70777095	NA|peak_8981
SEMA3E	0.058087114	0.093945735	0.072598731	2.120987373	2.418133767	2.884016017	-4.711099953	9.09E-09	2.19E-06	2	7	2	1	0	0	65	95	64	52	30	40	-2.562726721	0.012961223	60.08208105	NA|peak_2683
C1QTNF8	0.076297773	0	0.042911491	1.336953984	0.604432434	1.266446756	-4.389112836	0.00014943	0.001020828	4	1	0	3	8	0	39	33	52	19	4	28	-2.508687643	3.41E-05	0.36506525	NA|peak_13743
SH2D4A	0.143327737	0.139705422	0.115157955	1.423384833	1.001863331	1.985246999	-3.129112931	5.30E-06	8.01E-05	2	16	2	8	38	10	59	71	61	31	29	46	-2.345133161	0.000836473	6.272416061	NA|peak_6270
NOS1	0.041697912	0.040463442	0.065665019	0.261921804	0.139905175	0.1787094	-1.665362971	0.001234195	0.005620937	45	11	28	36	37	32	123	34	19	17	32	5	-2.062829421	2.20E-05	0.247986189	NA|peak_14335
GABRA2	0.004339055	0.015789739	0.029284523	0.1146721	0.06066014	0.178342274	-2.514044192	0.003122935	0.011874156	3	0	1	5	0	0	12	13	10	9	4	4	-1.376826763	0.012885873	60.39160869	NA|peak_6485
PATJ	0.884569839	0.622894453	0.942381507	2.042583555	2.528753208	2.702592847	-1.248837827	0.000143406	0.00098965	25	43	56	31	67	60	99	143	116	87	54	74	-1.271093357	0.034387229	134.8793582	NA|peak_10241
GJD2	0.074250759	0.10807884	0.19209695	0.392458271	0.415211261	1.017275931	-1.970318976	0.002478291	0.00982362	4	31	12	20	35	24	36	37	63	20	21	25	-1.961812721	0.001323283	9.423918504	NA|peak_7783
TRPM1	0.068798228	0.055225466	0.122909042	0.599864	0.776984809	0.592840207	-2.69732619	1.68E-05	0.000191198	4	2	3	6	4	2	28	52	30	8	20	15	-1.8812263	0.000431171	3.569118029	NA|peak_11677
LOC113844117	0.046440705	0.016899684	0.041790785	0.821777575	0.839687163	0.528587735	-4.054757849	9.39E-06	0.000124609	1	0	0	0	0	0	13	16	5	2	2	0	-7.381406618	7.65E-287	1.08E-281	NA|peak_9692
LOC101797054	0.006881286	0.006260218	0.007740364	0.687897365	0.776018335	0.507647434	-6.112028238	2.71E-07	1.03E-05	1	0	0	0	6	0	32	39	25	20	17	14	-4.415553892	4.95E-06	0.061838197	NA|peak_724
SYTL2	0.152197145	0.111537729	0.15693134	2.526050954	1.067800875	2.419348068	-3.517581326	6.45E-06	9.36E-05	2	24	28	8	16	2	80	46	73	108	41	115	-1.500600808	0.010746305	52.89213061	NA|peak_1381
PLCH2	0.047931828	0.027749115	0.029408596	0.340466963	0.357380585	0.37197251	-3.008814104	8.55E-06	0.000115271	0	4	0	0	0	0	4	4	12	2	2	5	-6.028901353	1.28E-71	1.25E-66	NA|peak_16762
CACNA1D	0.034613771	0.043298356	0.048668802	0.238635427	0.286308504	0.355670664	-2.473724275	2.39E-05	0.000248324	3	0	2	13	0	3	13	8	15	4	0	3	-4.321203357	6.14E-15	1.96E-10	NA|peak_12826
97717df5-85c9-409c-b480-491de14099c4	0.184175608	0.251329325	0.294816797	0.537201796	0.825250417	1.321376408	-1.558478766	0.00132294	0.005936322	5	4	4	9	15	3	19	24	21	2	11	10	-2.701364506	3.66E-06	0.047631531	NA|peak_4973
C1QL2	0.04680629	0	0.157949121	1.210100659	1.112401019	1.23321486	-3.844571399	0.000273008	0.001645107	0	5	0	0	0	0	20	13	14	17	13	3	-3.023188921	0.000667424	5.317571794	NA|peak_9781
GJB3	0.097295917	0.147524163	0.133763162	0.472030931	0.493702311	0.59244763	-1.718283193	0.000329185	0.00190489	16	0	5	10	3	14	42	59	84	26	11	6	-2.638114083	1.27E-08	0.000279147	NA|peak_16909
LOC101801425	0.061808631	0.131203587	0.046349986	1.941227709	0.748875211	1.172508908	-3.627574411	9.30E-05	0.000704742	3	0	1	0	0	0	53	17	29	18	7	12	-3.345220442	6.45E-07	0.009786763	NA|peak_10790
LOC101793031	0.145729111	0.190578526	0.194657737	0.701190287	0.68758806	1.363041865	-2.046376574	0.00018108	0.001190709	10	15	28	11	23	31	41	66	64	18	11	23	-2.101303569	1.34E-05	0.154809767	peak_8804|peak_9199
TMEM117	0.113901675	0.160142329	0.093179237	0.594897557	0.540433705	0.752975826	-2.023664875	0.000146068	0.001001265	5	2	1	0	1	0	5	17	14	9	8	9	-3.147455732	0.021506974	92.31123042	NA|peak_2565
0e8ccec0-02d2-4a5f-8d24-be8a298e0e4b	0.00672799	0.006120757	0.01513586	0.371074714	0.507910699	0.609787246	-5.34691265	1.13E-06	2.74E-05	0	2	0	0	3	5	20	44	31	17	12	16	-3.608214989	4.87E-06	0.061515419	NA|peak_3913,peak_3914
LOC101800581	0.535614109	0.906553283	0.854683116	2.046700745	2.066429205	2.284164198	-1.17052645	0.000410004	0.00227323	2	9	8	7	10	9	25	24	29	14	7	11	-1.83059228	0.000691716	5.409687435	NA|peak_18329
PTK2B	0.202952075	0.323110699	0.214021059	0.801624458	0.851183086	0.815450994	-1.417855439	0.00070789	0.003563332	30	27	31	50	40	24	118	180	124	93	53	55	-1.608168074	0.00427474	24.43636244	NA|peak_6115
WNT7B	0	0.011285739	0.006977052	0.769730531	0.549187674	0.889024291	-6.420363181	7.13E-07	1.95E-05	15	8	28	0	2	2	216	321	223	170	97	163	-2.785275643	0.004191139	24.17527538	NA|peak_2220
ADGRV1	0.011255106	0.030717838	0.017724311	0.320727379	0.086016234	0.106754607	-2.774602535	0.001723485	0.007340677	7	0	3	2	3	5	15	4	5	1	2	0	-3.193655759	0.011106457	54.24587507	NA|peak_18720
KCND3	0.008977003	0.040833927	0.035342001	0.505431364	0.363946531	0.368969508	-3.534772561	2.12E-05	0.000226066	0	3	8	3	6	4	44	69	39	27	16	20	-1.608184094	0.002392034	15.40046376	NA|peak_17688
HTR1F	0.035418386	0.012888683	0.023904065	0.480225848	0.71301636	0.440458803	-4.158040499	7.82E-06	0.000107948	2	2	2	13	0	6	38	49	46	13	26	11	-3.345220442	6.45E-07	0.009786763	NA|peak_579
ADARB2	0.073333682	0.218339896	0.292460452	1.869112262	1.609264915	2.452058058	-3.043489094	2.79E-05	0.000278457	0	1	6	2	1	6	35	16	19	17	7	10	-1.546759584	0.006609758	34.81784053	NA|peak_3729
PIRT	0.09543201	0.122993325	0.080509489	1.29758533	1.119197544	1.609194624	-3.411674948	5.15E-07	1.57E-05	3	2	1	0	0	0	17	31	40	11	26	8	-1.675274198	0.004911062	27.57917075	NA|peak_15185
GRM4	0.211828706	0.213357676	0.331881563	0.990983426	0.951869753	1.498922403	-1.869606338	8.50E-05	0.000657465	21	26	1	22	2	19	46	38	11	6	3	2	-3.345738346	0.005969703	32.38296016	NA|peak_17638
HOXB1	0.051368135	0.084117449	0.104005914	1.310332538	1.091554983	1.970560152	-3.862685969	1.81E-06	3.83E-05	0	7	8	2	15	9	89	104	73	53	37	74	-1.608136037	0.013930622	62.97281171	NA|peak_18087
SOST	0.116529985	0.082454244	0.203898933	1.353852437	1.20673569	1.350905267	-2.976059482	1.37E-05	0.000163675	0	6	16	23	1	25	89	80	41	64	15	23	-2.224854946	0.00049874	4.023911971	NA|peak_17869
FAM81A	0.085202382	0.106579636	0.155738806	0.208039322	0.436748481	0.549986906	-1.469659461	0.008244329	0.026492652	1	3	0	0	0	0	18	9	9	3	3	1	-4.321203357	6.14E-15	1.96E-10	NA|peak_12390
STMN3	0.096460112	0.142600458	0.122065243	1.524000872	1.033862008	0.813265344	-2.901658995	2.35E-05	0.000244837	7	23	23	11	44	31	140	325	167	165	52	123	-1.608159875	0.007686587	39.35191454	peak_15437|peak_16122
FAM83B	0.007573592	0.024115138	0	1.20527583	1.005851243	1.021660036	-6.217485253	6.51E-07	1.83E-05	1	4	0	0	0	0	122	122	110	66	39	50	-4.723715918	1.80E-07	0.003271641	NA|peak_5981
SIM1	0.013236005	0.024082785	0.014888421	1.034190606	1.085566834	0.976448803	-5.442915107	2.80E-07	1.04E-05	0	2	4	0	0	0	30	39	27	15	0	14	-4.271291251	6.08E-10	1.52E-05	NA|peak_5117
VGLL1	0.039836183	0.045300973	0.061612972	0.30324829	0.292378383	0.304375889	-2.301380391	3.78E-05	0.000354724	0	0	0	0	20	5	11	11	13	2	3	4	-12.16042535	0	0	NA|peak_11203
CNNM1	0.316497206	0.383909105	0.617083175	2.679018151	3.441388043	2.957500186	-2.483343011	5.16E-06	7.87E-05	6	29	3	12	24	21	92	64	80	25	31	42	-1.970769811	0.000464368	3.819107706	NA|peak_8660
ALX4	0.029081784	0.132285073	0.032712428	5.496948904	6.17977785	6.252385206	-6.126710393	6.91E-08	4.86E-06	2	0	9	0	2	12	185	248	145	136	97	80	-1.415499159	0.01538205	68.5614273	NA|peak_8492
BCL11B	0.084919818	0.171678668	0.074294441	15.56882162	12.59292275	6.94091118	-6.385329125	5.28E-07	1.60E-05	2	10	14	0	0	0	343	337	224	207	144	132	-1.830552296	0.003480574	20.92891051	NA|peak_7414
GRHL2	0.053756338	0.076073779	0.073904619	5.778751393	6.78590607	5.98005649	-6.18382194	1.17E-10	8.72E-07	2	40	66	50	26	48	309	336	326	194	187	166	-1.175169064	0.041308186	152.1919546	NA|peak_3557
